# Supplementary material for: Multi-omics analysis of pigmentation related to proanthocyanidin biosynthesis in brown cotton (Gossypium hirsutum L.)
Source: Front Plant Sci. 2024 Mar 13;15:1372232. doi: 10.3389/fpls.2024.1372232 (PMC10965557; doi:10.3389/fpls.2024.1372232)
Supplement: Supplementary Data Sheet 1 — A two-way ANOVA analysis of ESI MS Positive and Negative data. [file DataSheet_1.xlsx]

## Sheet: ESI MS Positive
Row ID	m/z	RT	ESI MS mode	Formula	Name	8 dpa BL (Lsmean Log2)	12 dpa BL (Lsmean Log2)	16 dpa BL (Lsmean Log2)	20 dpa BL (Lsmean Log2)	24 dpa BL (Lsmean Log2)	36 dpa BL (Lsmean Log2)	40 dpa BL (Lsmean Log2)	50 dpa BL (Lsmean Log2)	8 dpa WL (Lsmean Log2)	12 dpa WL (Lsmean Log2)	16 dpa WL (Lsmean Log2)	20 dpa WL (Lsmean Log2)	24 dpa WL (Lsmean Log2)	36 dpa WL (Lsmean Log2)	40 dpa WL (Lsmean Log2)	50 dpa WL (Lsmean Log2)	8 dpa BL/WL (Log2)	12 dpa BL/WL (Log2)	16 dpa BL/WL (Log2)	20 dpa BL/WL (Log2)	24 dpa BL/WL (Log2)	36 dpa BL/WL (Log2)	40 dpa BL/WL (Log2)	50 dpa BL/WL (Log2)	8 dpa -log10(p-value)	12 dpa -log10(p-value)	16 dpa -log10(p-value)	20 dpa -log10(p-value)	24 dpa -log10(p-value)	36 dpa -log10(p-value)	40 dpa -log10(p-value)	50 dpa -log10(p-value)	8 dpa Sig Index	12 dpa Sig Index	16 dpa Sig Index	20 dpa Sig Index	24 dpa Sig Index	36 dpa Sig Index	40 dpa Sig Index	50 dpa Sig Index
70	129.052	1.45191	Positive	NA	Unknown	27.8987	28.5173	26.9781	27.9402	27.9814	27.6364	27.8442	24.3662	26.2892	27.1655	26.6642	27.747	26.7399	27.5407	27.3833	24.7917	1.60958	1.35175	0.313843	0.193184	1.24142	0.0956307	0.460916	-0.425525	2.16261	1.67656	0.238736	0.136064	1.48142	0.0630917	0.382832	0.346246	1	0	0	0	0	0	0	0
77	128.019	0.588517	Positive	NA	Unknown	25.8752	25.4977	26.1135	25.7707	27.1578	28.1766	27.7942	25.2346	25.4359	26.509	26.948	26.7911	27.2266	26.2453	26.9087	25.9238	0.4393	-1.01134	-0.834447	-1.02041	-0.0687642	1.93136	0.885579	-0.689159	0.424325	1.32696	1.0083	1.34416	0.0509916	3.38691	1.09704	0.772073	0	0	0	0	0	1	0	0
164	157.083	6.48682	Positive	C6H14O3	Dipropylene glycol	27.7388	28.7034	26.2568	27.7013	27.8083	27.1181	27.5049	23.2587	25.5771	26.1997	23.7391	26.3578	25.0517	25.6812	25.6494	23.9639	2.16165	2.50362	2.51767	1.3435	2.7567	1.43694	1.85552	-0.705179	2.24794	2.78165	2.80417	1.12812	3.19358	1.24207	1.79912	0.468073	1	1	1	0	1	0	0	0
192	110.009	0.58862	Positive	NA	Unknown	24.6156	24.1999	24.8958	24.5622	25.9196	27.0202	26.6837	24.0212	24.0518	25.1998	25.6873	25.5992	26.0792	24.9426	25.7765	24.748	0.563797	-0.999872	-0.791422	-1.03705	-0.159594	2.07765	0.907279	-0.726828	0.530338	1.1672	0.839369	1.22988	0.116323	3.36342	1.01654	0.746298	0	0	0	0	0	1	0	0
301	173.078	4.1915	Positive	NA	Unknown	23.9761	25.0427	24.2784	24.5335	24.198	24.1012	23.626	24.4214	23.2292	24.8875	24.2192	23.8999	23.6927	23.3717	23.3134	26.4961	0.746898	0.155176	0.0592173	0.633611	0.505376	0.729485	0.312615	-2.07465	1.28868	0.16941	0.058712	1.01898	0.74356	1.2457	0.394347	5.4862	0	0	0	0	0	0	0	1
336	215.124	7.68175	Positive	NA	Unknown	30.1315	31.1475	29.9613	30.9792	30.8868	30.3716	30.366	21.3098	27.2868	28.1763	27.1766	29.5368	28.414	28.4629	28.0369	21.7682	2.84469	2.97122	2.78469	1.44243	2.47285	1.90874	2.32908	-0.458443	3.57751	3.80231	3.47163	1.33968	2.93118	2.01307	2.68878	0.289418	1	1	1	0	1	1	1	0
495	146.029	0.58799	Positive	NA	Unknown	22.2844	22.0594	22.5263	22.1502	23.6162	24.5333	24.086	21.6728	21.9162	23.0061	23.395	23.1428	23.5746	22.7528	23.219	22.2726	0.368184	-0.946747	-0.868692	-0.992571	0.0415602	1.7805	0.866922	-0.599844	0.364236	1.30857	1.15658	1.40097	0.0319729	3.26881	1.15321	0.689672	0	0	0	0	0	1	0	0
556	129.019	0.623172	Positive	NA	Unknown	22.6657	22.2425	22.9103	22.5859	24.0416	25.0701	24.6792	22.099	22.1647	23.3032	23.7932	23.6426	24.1025	23.211	23.7799	22.8144	0.50099	-1.06066	-0.882894	-1.05664	-0.0608984	1.8591	0.899307	-0.715322	0.479051	1.3465	1.03571	1.33915	0.0431537	3.04115	1.06312	0.771843	0	0	0	0	0	1	0	0
687	107.07	1.45065	Positive	NA	Unknown	26.7616	27.9577	25.7506	26.8299	27.0721	26.4471	26.7751	22.1231	24.9826	25.9333	23.5439	26.6534	25.3787	26.2658	25.9473	22.1215	1.77897	2.02435	2.2067	0.17654	1.69332	0.181272	0.827783	0.00160131	1.61187	1.9459	2.20674	0.0882088	1.50037	0.090787	0.552858	0.000731533	0	0	1	0	0	0	0	0
785	291.085	8.37666	Positive	C15H14O6	Epicatechin	23.9295	23.5997	25.6092	25.8097	25.0949	24.7134	23.0012	19.4821	22.7606	19.6517	21.7542	20.7189	20.2297	17.8699	17.5279	14.2751	1.16889	3.94798	3.85508	5.09081	4.86519	6.84341	5.47335	5.20693	0.627859	3.55704	3.43956	5.03634	4.74147	7.30063	5.53645	5.18822	0	1	1	1	1	1	1	1
786	139.038	8.29993	Positive	NA	Unknown	23.1433	23.4524	23.323	23.1841	22.8723	22.5068	21.2015	18.2777	20.9204	19.2	19.8895	19.8344	18.7647	17.6174	16.4045	14.4908	2.22291	4.25247	3.4335	3.34963	4.1076	4.88944	4.79698	3.78686	1.50813	3.84432	2.83812	2.7387	3.6626	4.65416	4.53586	3.26534	0	1	1	1	1	1	1	1
787	105.003	0.589087	Positive	NA	Unknown	23.9587	23.5945	24.2009	23.8789	25.3154	26.3352	25.9575	23.3622	23.4711	24.5777	25.0661	24.9356	25.3667	24.3799	25.0445	24.0578	0.48769	-0.983187	-0.865245	-1.05668	-0.0513295	1.9553	0.91302	-0.695592	0.463439	1.20976	1.00853	1.34193	0.0361617	3.27462	1.08838	0.744168	0	0	0	0	0	1	0	0
789	226.559	8.37749	Positive	NA	Unknown	20.0563	19.7835	22.3034	22.6435	21.9406	21.3524	19.7242	17.1595	19.9682	16.4696	19.0896	17.3165	17.1105	13.1189	11.3175	1.95399e-14	0.0880873	3.31386	3.21382	5.32694	4.8301	8.23345	8.40676	17.1595	0.0324314	2.76742	2.64753	5.33922	4.6903	8.99541	9.19994	17.3847	0	1	1	1	1	1	1	1
791	151.034	0.588371	Positive	NA	Unknown	24.2668	24.009	24.5303	24.1355	25.5222	26.5211	26.1339	23.6721	23.9857	24.9505	25.3651	25.13	25.6106	24.6233	25.2433	24.284	0.281075	-0.941568	-0.834744	-0.994472	-0.0884305	1.89778	0.890652	-0.611918	0.254357	1.25778	1.05901	1.36084	0.0690774	3.46809	1.16145	0.687708	0	0	0	0	0	1	0	0
792	206.046	8.42327	Positive	NA	Unknown	20.6716	19.4565	22.2535	22.9827	22.4335	21.8343	20.6611	18.6744	19.8824	16.4126	18.9896	17.443	17.3589	12.2674	12.5494	-1.18572e-13	0.789131	3.04394	3.2639	5.53976	5.07454	9.5669	8.11174	18.6744	0.327192	2.08249	2.30538	4.8582	4.3159	9.38344	7.81557	17.0542	0	1	1	1	1	1	1	1
794	215.051	8.37024	Positive	NA	Unknown	19.3074	19.1123	21.527	21.5275	20.5673	20.0268	18.307	13.1495	18.9084	15.2529	18.0674	15.8452	15.3017	11.6053	10.5035	-2.86438e-14	0.39908	3.85932	3.45959	5.68227	5.26557	8.42149	7.80347	13.1495	0.133219	2.61334	2.22946	4.50718	4.06145	7.42768	6.78122	11.8928	0	1	1	1	1	1	1	1
796	82.5373	0.588134	Positive	NA	Unknown	24.0949	23.6986	24.3744	23.9945	25.352	26.311	25.9846	23.528	23.6698	24.7604	25.1592	25.0219	25.4819	24.4428	25.2425	24.2375	0.425011	-1.06188	-0.784804	-1.02737	-0.129905	1.86821	0.742039	-0.709514	0.400308	1.39817	0.908765	1.33304	0.099607	3.17349	0.840463	0.789889	0	0	0	0	0	1	0	0
797	86.9929	0.588939	Positive	NA	Unknown	22.6757	22.291	22.9244	22.6006	24.0551	25.112	24.7302	22.029	22.1314	23.2806	23.8051	23.6306	24.111	23.1178	23.8217	22.7823	0.54436	-0.989614	-0.880633	-1.02993	-0.0559266	1.99415	0.908561	-0.753378	0.514926	1.17114	0.992215	1.24011	0.0383547	3.23067	1.037	0.797875	0	0	0	0	0	1	0	0
811	112.006	0.588679	Positive	NA	Unknown	21.7251	21.3384	22.0404	21.662	23.0489	24.1702	23.8422	21.1235	21.1909	22.3892	22.8201	22.7401	23.2052	22.0596	22.9113	21.8417	0.534187	-1.05079	-0.779635	-1.07806	-0.15636	2.1106	0.93094	-0.718152	0.485746	1.23005	0.807344	1.27617	0.112073	3.37621	1.03495	0.72112	0	0	0	0	0	1	0	0
817	156.013	0.58836	Positive	NA	Unknown	21.5028	21.0676	21.7487	21.4218	22.8375	23.8792	23.5417	20.8798	20.9553	22.1214	22.6147	22.4791	22.9466	21.8872	22.6415	21.5957	0.547477	-1.05382	-0.866068	-1.05729	-0.10919	1.99194	0.900131	-0.715922	0.51333	1.26686	0.95821	1.27288	0.0771825	3.1887	1.01178	0.735608	0	0	0	0	0	1	0	0
819	111.009	0.587781	Positive	NA	Unknown	21.446	21.0301	21.7185	21.3645	22.7492	23.8896	23.5462	20.8262	20.8723	22.0436	22.5315	22.4455	22.9274	21.7738	22.6174	21.5618	0.573646	-1.01349	-0.812964	-1.08101	-0.178226	2.11585	0.928765	-0.7356	0.53527	1.17261	0.858916	1.28631	0.130083	3.40137	1.03557	0.748039	0	0	0	0	0	1	0	0
827	289.069	8.36869	Positive	NA	Unknown	24.396	24.7438	24.712	24.078	24.0281	23.464	22.352	18.9958	24.0077	23.3068	23.6754	23.3109	22.9914	21.298	19.9479	13.8956	0.388354	1.43698	1.03657	0.767142	1.03671	2.16594	2.40412	5.10023	0.301931	1.78238	1.1119	0.730049	1.11213	3.23031	3.74265	9.53286	0	0	0	0	0	1	1	1
832	132.013	0.578507	Positive	NA	Unknown	18.3694	16.6486	18.6075	18.3653	19.6454	20.3319	20.0337	16.7492	17.148	18.6881	19.4183	19.2838	19.6206	18.973	19.3684	18.1225	1.22139	-2.03954	-0.810838	-0.918478	0.0247955	1.35882	0.665304	-1.37328	1.09536	2.30247	0.621093	0.735508	0.0127914	1.27591	0.478153	1.29551	0	1	0	0	0	0	0	0
836	127.007	0.664047	Positive	NA	Unknown	20.5562	21.0459	21.9116	20.6558	18.8391	18.0233	18.4044	8.53606	21.7041	21.5994	21.6963	20.5278	19.3914	17.7233	17.3728	15.3042	-1.14789	-0.55345	0.215303	0.128081	-0.552291	0.300011	1.0316	-6.7681	0.314726	0.133532	0.0480386	0.0279895	0.133218	0.0682881	0.276125	3.66473	0	0	0	0	0	0	0	1
838	100.024	0.587857	Positive	NA	Unknown	21.2937	20.9155	21.4872	21.143	22.603	23.5513	23.1272	20.794	20.8103	21.9968	22.3362	22.2056	22.5984	21.7143	22.3108	21.3546	0.483407	-1.08131	-0.848935	-1.06266	0.00461063	1.83707	0.81641	-0.560641	0.508285	1.55716	1.09913	1.51831	0.00339425	3.35609	1.03981	0.618755	0	0	0	0	0	1	0	0
845	88.9904	0.588639	Positive	NA	Unknown	19.9653	19.5752	20.2403	19.906	21.3393	22.422	22.0537	19.3331	19.4326	20.5724	21.0901	20.9523	21.4091	20.3639	21.1224	20.0829	0.532684	-0.997247	-0.849831	-1.04636	-0.0698785	2.05804	0.931295	-0.749801	0.499051	1.18034	0.940775	1.26461	0.0483063	3.36807	1.07063	0.790232	0	0	0	0	0	1	0	0
850	375.037	8.43613	Positive	NA	Unknown	16.5749	17.1603	17.2338	18.5219	18.0916	16.9043	17.5148	15.2241	14.6239	3.6061	14.0382	8.66814	5.87317	-5.55112e-16	-7.77156e-16	-2.78666e-14	1.95095	13.5542	3.19564	9.85377	12.2184	16.9043	17.5148	15.2241	0.287647	4.1573	0.538139	2.6468	3.59881	5.58118	5.84053	4.86555	0	1	0	1	1	1	1	1
869	579.147	7.98455	Positive	NA	Unknown	21.957	20.5559	20.2291	19.0202	19.5521	17.8012	16.8696	16.825	23.1075	20.9323	21.4577	18.6092	17.6539	15.25	12.7267	5.37348e-14	-1.15054	-0.376397	-1.2286	0.411001	1.89821	2.55124	4.14292	16.825	0.405614	0.108579	0.4412	0.119709	0.78831	1.19516	2.41624	13.2796	0	0	0	0	0	0	1	1
879	85.0091	0.684013	Positive	NA	Unknown	22.7742	23.0194	23.1278	22.3095	21.3772	20.313	21.3065	15.9442	22.9585	23.0375	22.8909	22.6308	21.7596	20.0902	18.069	13.9926	-0.184234	-0.0180113	0.236904	-0.321282	-0.382462	0.222854	3.2375	1.95166	0.101963	0.00908724	0.134868	0.191156	0.234751	0.125924	4.32646	2.10311	0	0	0	0	0	0	1	1
918	163.111	11.123	Positive	NA	Unknown	23.4514	23.4468	23.4029	23.6087	22.685	24.1362	22.1919	21.4011	23.4582	22.8872	24.0828	24.9428	22.7153	23.2705	23.041	22.5367	-0.00674561	0.559572	-0.679992	-1.33404	-0.0302893	0.865708	-0.849036	-1.13557	0.00553286	0.712057	0.932593	2.46649	0.0253935	1.31512	1.2788	1.9506	0	0	0	1	0	0	0	0
924	216.949	0.586114	Positive	NA	Unknown	20.919	20.8373	21.297	21.0899	22.0367	23.3982	23.2351	20.4616	20.463	21.0702	21.8688	22.1135	22.6308	20.884	21.9617	21.0886	0.455973	-0.232941	-0.571839	-1.02357	-0.594103	2.51423	1.27342	-0.627032	0.378292	0.168622	0.506229	1.12444	0.532292	4.09753	1.54016	0.571709	0	0	0	0	0	1	0	0
957	196.153	4.19318	Positive	NA	Unknown	23.0152	24.0178	23.2353	23.0555	22.8	22.5686	22.4573	23.485	22.6322	24.1976	23.651	23.2857	22.938	22.7275	22.6371	25.6941	0.383006	-0.179802	-0.41574	-0.230182	-0.138006	-0.158906	-0.179815	-2.20918	0.544461	0.212134	0.607251	0.285244	0.156095	0.183597	0.212152	6.2977	0	0	0	0	0	0	0	1
988	202.179	6.05473	Positive	NA	Unknown	21.7789	20.9313	21.7483	21.3593	21.4882	21.8722	21.6722	21.0693	22.3073	21.8117	22.7269	23.4288	22.7074	22.6065	22.9605	22.6712	-0.528372	-0.880374	-0.978579	-2.06953	-1.21921	-0.734321	-1.28831	-1.60192	1.0647	2.22934	2.59966	7.12662	3.56031	1.71114	3.84595	5.16691	0	0	0	1	1	0	1	1
999	398.239	12.5135	Positive	NA	Unknown	24.4876	24.887	24.1811	24.3376	24.4516	24.6138	24.1243	24.0753	23.8654	23.0869	24.0194	24.1558	24.1183	24.037	23.9467	24.1091	0.622147	1.80007	0.16166	0.181729	0.333339	0.576754	0.177524	-0.0337986	1.73799	7.44528	0.281732	0.325306	0.716512	1.55655	0.316017	0.0489701	0	1	0	0	0	0	0	0
1004	124.097	1.44988	Positive	NA	Unknown	26.3229	27.3711	25.3629	26.3799	26.5393	25.9358	26.316	21.8298	24.575	25.4804	23.1606	26.1938	24.9885	25.7273	25.5454	21.8185	1.74794	1.8907	2.20232	0.186164	1.55076	0.208484	0.770642	0.0112619	1.66865	1.87096	2.33705	0.0977946	1.40252	0.110786	0.531271	0.00539078	0	0	1	0	0	0	0	0
1104	180.158	6.51264	Positive	NA	Unknown	23.5888	24.3389	22.3807	23.7067	23.8351	23.1657	23.9353	19.4554	22.2893	22.9628	20.8557	23.1874	21.9458	22.753	22.5587	20.9572	1.29947	1.37607	1.52502	0.519364	1.88929	0.412648	1.37666	-1.50183	1.26575	1.37468	1.59554	0.366178	2.18031	0.275555	1.37553	1.5604	0	0	0	0	1	0	0	0
1107	117.091	6.51223	Positive	NA	Unknown	25.1887	26.5448	23.4363	25.109	25.1995	24.1676	24.7714	20.1667	22.6802	23.4147	20.9548	23.9706	22.2851	23.0256	22.7485	20.9168	2.50842	3.13008	2.48154	1.13843	2.91436	1.14204	2.02286	-0.750133	2.05699	2.83689	2.02491	0.668983	2.55876	0.67186	1.50358	0.387228	1	1	1	0	1	0	0	0
1110	135.116	12.1504	Positive	NA	Unknown	20.5803	22.502	21.5359	22.4911	21.4482	21.1257	20.8401	17.9773	18.7047	20.5825	21.1653	21.8783	20.3034	21.2682	20.8807	19.5271	1.87565	1.91955	0.370594	0.612813	1.14479	-0.142588	-0.0405206	-1.54985	3.44126	3.55539	0.360018	0.694942	1.68434	0.117072	0.0306416	2.61833	1	1	0	0	0	0	0	1
1114	152.127	6.52311	Positive	NA	Unknown	25.1832	26.5876	23.4869	25.1997	25.2073	24.2774	24.8195	20.292	22.7403	23.4499	21.0684	23.9699	22.3453	23.1377	22.7926	20.9684	2.44292	3.13771	2.41854	1.2298	2.86197	1.13974	2.02689	-0.676345	2.11366	3.03729	2.08297	0.790786	2.6606	0.712405	1.61002	0.359707	1	1	1	0	1	0	0	0
1117	180.159	6.09537	Positive	NA	Unknown	23.4322	24.4584	22.2663	23.3935	23.3902	22.6994	22.9679	19.181	21.2964	21.872	19.8109	22.1763	20.8657	21.5471	21.2992	19.7231	2.13583	2.58641	2.45539	1.21716	2.5245	1.15225	1.66865	-0.542062	2.28228	3.01038	2.79361	1.01223	2.90749	0.937022	1.5926	0.34458	1	1	1	0	1	0	0	0
1144	152.127	6.09644	Positive	NA	Unknown	23.8896	25.3816	22.2025	23.79	23.7461	22.826	23.1152	18.8695	21.2081	21.8092	19.607	22.3175	20.7785	21.4924	21.1136	19.4892	2.68157	3.57241	2.59551	1.47246	2.96762	1.33362	2.00161	-0.619622	2.44641	3.68797	2.3331	1.02755	2.83283	0.893914	1.59756	0.325383	1	1	1	0	1	0	0	0
1145	117.091	6.09543	Positive	NA	Unknown	23.7938	25.1871	22.1389	23.6764	23.6531	22.7107	23.0153	18.7404	21.0217	21.7231	19.4207	22.2458	20.7002	21.3893	21.0801	19.3767	2.77214	3.46407	2.71827	1.4306	2.9529	1.32143	1.93529	-0.636274	2.51173	3.45757	2.44118	0.965788	2.75216	0.864179	1.48835	0.330042	1	1	1	0	1	0	0	0
1187	152.127	1.45373	Positive	NA	Unknown	23.389	23.4901	22.6495	23.205	23.1146	22.8471	23.0297	20.1322	21.944	22.5527	20.9798	22.8487	22.2599	22.7917	22.6996	20.1272	1.44497	0.937364	1.66966	0.356304	0.854698	0.0554261	0.3301	0.00502328	2.3161	1.23513	2.85546	0.336628	1.0825	0.0417965	0.306257	0.00363494	1	0	1	0	0	0	0	0
1203	291.084	8.08406	Positive	C15H14O6	Catechin	29.1391	28.8144	29.0844	28.2419	27.384	27.016	24.9496	21.6575	28.0492	25.7272	26.5966	25.2275	24.5866	22.2053	21.1921	16.8338	1.08993	3.08726	2.48772	3.01441	2.79738	4.81065	3.75742	4.82378	1.03327	4.58864	3.40295	4.44271	4.01025	7.99345	5.93453	8.01834	0	1	1	1	1	1	1	1
1206	139.038	8.05648	Positive	NA	Unknown	25.9224	25.5943	25.9793	25.3295	24.6304	24.2191	22.4307	22.5517	25.1305	23.1468	23.9064	22.8568	22.4721	20.433	20.6442	17.9509	0.791812	2.44745	2.07287	2.47272	2.15835	3.78609	1.78645	4.60081	0.447437	2.16265	1.69736	2.19528	1.80033	4.03557	1.3679	5.24706	0	1	0	1	0	1	0	1
1209	311.051	8.09141	Positive	NA	Unknown	19.424	18.4877	20.196	19.4262	17.9149	15.5664	15.0776	12.0297	21.7015	18.5219	19.3126	17.4641	16.2983	11.3578	11.6406	4.44089e-16	-2.27751	-0.0342321	0.883397	1.96204	1.61664	4.20854	3.43705	12.0297	2.1729	0.0152391	0.569867	1.7482	1.32006	5.15218	3.91712	15.5546	1	0	0	0	0	1	1	1
1210	123.044	8.09001	Positive	NA	Unknown	23.0718	22.7725	23.0234	22.2053	21.4704	21.09	19.585	15.8492	22.0927	20.2296	20.9238	20.1733	19.9309	18.4933	16.728	15.4392	0.979013	2.54294	2.09956	2.03205	1.53948	2.59667	2.85697	0.410018	0.7547	2.96829	2.24931	2.14469	1.43162	3.05857	3.50332	0.247028	0	1	1	1	0	1	1	0
1211	579.147	7.90121	Positive	NA	Unknown	22.7593	21.5686	20.7998	19.7377	20.4302	18.7353	17.5205	17.9699	24.0945	21.0143	21.492	18.6435	17.7453	13.6728	12.49	3.38695	-1.3352	0.554341	-0.692224	1.0942	2.68484	5.06253	5.03057	14.583	0.384939	0.135277	0.17425	0.300348	0.980907	2.45316	2.4307	9.63805	0	0	0	0	0	1	1	1
1215	199.058	2.3315	Positive	NA	Unknown	19.0864	21.1451	20.8058	21.6615	21.425	21.8196	22.6055	19.934	15.9282	16.9866	18.1894	22.2109	19.8898	20.5659	18.6963	19.9023	3.15826	4.15856	2.61641	-0.549407	1.5352	1.25378	3.90918	0.0316816	1.96236	2.92583	1.49193	0.19288	0.702868	0.53571	2.67632	0.00942309	0	1	0	0	0	0	1	0
1216	289.069	8.13419	Positive	NA	Unknown	23.7941	23.7765	23.605	22.8744	22.5488	23.1461	22.3104	20.3119	22.9258	20.6511	20.8434	20.0444	20.9625	19.258	17.9854	14.1604	0.868316	3.1254	2.76162	2.82998	1.58626	3.88813	4.32495	6.15148	0.474498	2.88039	2.40825	2.49531	1.07863	3.92377	4.54016	7.11973	0	1	1	1	0	1	1	1
1220	261.038	8.51797	Positive	NA	Unknown	18.304	21.1684	19.3027	19.057	19.0614	19.5574	15.2275	16.6866	3.6068	3.44003	9.20431	11.6545	9.73337	14.0081	-1.77636e-15	7.81333	14.6972	17.7284	10.0984	7.40247	9.32801	5.54933	15.2275	8.87325	3.60116	4.66179	2.0983	1.33577	1.86891	0.886933	3.78444	1.73754	1	1	1	0	0	0	1	0
1223	226.559	8.08406	Positive	NA	Unknown	22.1226	21.7547	22.6242	22.5314	21.7984	21.0028	20.4441	17.0575	22.7574	21.2367	21.9754	20.7962	20.1431	17.8394	16.1939	1.15463e-14	-0.634807	0.517991	0.648801	1.73522	1.65533	3.16345	4.25022	17.0575	0.62807	0.479881	0.646796	2.62946	2.45578	5.9965	8.51812	25.349	0	0	0	1	1	1	1	1
1224	303.084	8.11312	Positive	NA	Unknown	22.8461	22.8753	23.3465	23.7863	23.007	21.5667	20.1799	17.5106	21.2961	19.6044	21.3394	21.4384	21.3872	20.5558	19.8496	11.6692	1.54994	3.27094	2.00711	2.34795	1.61981	1.01096	0.330311	5.84142	2.21263	6.20754	3.2139	4.00621	2.35935	1.19006	0.270757	11.7406	1	1	1	1	1	0	0	1
1234	151.008	0.588973	Positive	NA	Unknown	20.7874	20.4352	20.9732	20.6881	22.1513	23.0623	22.6381	20.2148	20.3421	21.4446	21.8976	21.6451	22.0927	21.2958	21.7629	20.8525	0.445323	-1.00939	-0.924351	-0.956938	0.0586456	1.76655	0.875153	-0.637678	0.44478	1.36795	1.20523	1.26668	0.0441953	3.0824	1.11461	0.716349	0	0	0	0	0	1	0	0
1237	473.104	8.67859	Positive	NA	Unknown	20.5622	20.5884	20.7512	19.5177	18.5936	16.3017	14.4421	7.04982	22.5012	20.2895	18.9232	18.277	16.6893	11.0162	11.9786	1.01474e-13	-1.93905	0.298889	1.82798	1.2407	1.90435	5.28555	2.46346	7.04982	0.71989	0.0767523	0.664391	0.39948	0.702368	3.02749	1.0041	4.5272	0	0	0	0	0	1	0	1
1238	625.152	9.28815	Positive	NA	Unknown	14.3745	15.4888	18.8638	19.8312	18.1913	13.7292	10.8039	2.93099e-14	13.4831	14.0549	15.1919	16.6676	15.6891	7.47713	8.88178e-16	3.55271e-15	0.891361	1.43393	3.67194	3.16364	2.50219	6.25205	10.8039	2.57572e-14	0.22166	0.397028	1.43539	1.15837	0.83232	3.10802	6.48418	0	0	0	0	0	0	1	1	0
1239	215.051	8.07218	Positive	NA	Unknown	20.635	20.3139	21.1644	20.8719	20.0215	19.2372	17.9779	13.2111	20.9234	18.8127	19.874	17.5944	16.9904	12.651	7.17101	3.88578e-14	-0.288473	1.50117	1.29047	3.27753	3.03117	6.5862	10.8069	13.2111	0.0723995	0.498562	0.410071	1.47152	1.31435	4.02026	7.58785	9.48713	0	0	0	0	0	1	1	1
1242	191.037	7.5857	Positive	NA	Unknown	12.3463	13.761	17.0365	16.4603	13.7737	15.2519	13.9082	3.40541	13.812	14.3608	15.4422	16.9873	16.0074	13.47	4.26949	3.40308	-1.4657	-0.599769	1.59438	-0.52701	-2.23364	1.78191	9.63868	0.00233057	0.261029	0.0939486	0.289117	0.0816225	0.441292	0.331578	3.44425	0.000331885	0	0	0	0	0	0	1	0
1243	199.058	6.46817	Positive	NA	Unknown	19.9296	20.9327	22.166	21.0613	20.5242	20.0254	20.1419	18.8781	19.1269	20.1723	21.0632	21.4635	21.1474	19.3012	17.8879	16.5689	0.802675	0.76042	1.10276	-0.402126	-0.623175	0.72415	2.25404	2.30911	1.09393	1.01316	1.73003	0.428637	0.76747	0.945721	4.78726	4.94372	0	0	0	0	0	0	1	1
1249	194.538	8.08674	Positive	NA	Unknown	20.0672	19.7012	20.6307	20.3895	19.6125	18.8662	17.4216	9.2157	20.5359	18.759	19.6195	17.8324	17.2503	13.0513	10.8115	-9.30367e-14	-0.468668	0.942249	1.01125	2.55711	2.36224	5.81495	6.61011	9.2157	0.100614	0.222745	0.242302	0.7988	0.716389	2.60044	3.12714	4.95201	0	0	0	0	0	1	1	1
1251	147.043	7.86891	Positive	NA	Unknown	22.1346	21.5556	21.6846	20.7522	19.5632	19.3604	19.0285	20.8555	23.2685	21.9597	21.8697	21.463	20.6139	17.7253	14.257	18.8498	-1.13392	-0.404085	-0.185103	-0.710775	-1.05069	1.63516	4.77154	2.00571	2.72822	0.627447	0.233747	1.38322	2.44299	4.56212	14.6954	5.96094	1	0	0	0	1	1	1	1
1252	221.041	2.41612	Positive	NA	Unknown	11.4828	11.1249	11.5859	13.4603	14.4052	15.618	17.304	13.4625	3.59483	7.41057	11.3762	14.0814	12.4359	13.0818	13.1	13.8215	7.88798	3.71438	0.209712	-0.621092	1.96928	2.53619	4.20406	-0.359034	3.47277	1.16863	0.0382568	0.122624	0.489724	0.685957	1.39649	0.0674339	1	0	0	0	0	0	0	0
1258	206.548	8.08474	Positive	NA	Unknown	18.8501	19.2352	20.1105	19.9945	19.6128	18.8829	18.4588	13.7195	19.4741	19.177	19.8727	18.8055	17.9562	14.9333	12.9908	-4.9738e-14	-0.623977	0.0581766	0.237757	1.18896	1.65662	3.94957	5.46798	13.7195	0.299298	0.0223159	0.0982718	0.688309	1.09234	3.82232	5.9021	15.2464	0	0	0	0	0	1	1	1
1260	579.147	8.47288	Positive	NA	Unknown	21.2631	19.9653	18.9678	17.41	18.3282	16.8118	15.158	11.1332	21.4616	17.9848	17.9363	13.8003	14.0132	8.54131	10.3626	7.21645e-14	-0.19848	1.9805	1.03153	3.60965	4.31506	8.27047	4.79545	11.1332	0.0253676	0.319365	0.147669	0.696039	0.890352	2.27222	1.03288	3.48443	0	0	0	0	0	1	0	1
1262	169.049	8.25285	Positive	NA	Unknown	23.4511	23.9425	24.3562	23.3111	22.3616	21.7798	21.3295	19.2218	19.9618	19.9861	20.8198	20.5242	20.1622	18.3113	18.3831	16.1676	3.48923	3.95642	3.53633	2.78695	2.19948	3.46852	2.94638	3.05416	5.74667	6.72262	5.84576	4.26653	3.06109	5.70308	4.60143	4.82863	1	1	1	1	1	1	1	1
1263	185.533	8.08559	Positive	NA	Unknown	19.7327	19.3072	20.2917	20.1851	19.5523	18.7707	18.6293	14.5829	20.5975	19.3835	19.9203	19.0474	18.2877	15.6573	13.6924	-7.37188e-14	-0.864774	-0.0763673	0.371409	1.13767	1.26461	3.11345	4.93696	14.5829	0.973807	0.053443	0.318362	1.44159	1.68104	5.94533	10.0953	23.3658	0	0	0	0	0	1	1	1
1268	579.147	8.3136	Positive	NA	Unknown	20.9377	20.0195	19.0083	16.0078	17.7348	15.347	12.7166	10.0649	21.4028	17.0263	17.9035	12.9578	12.879	7.52688	-2.55351e-15	1.56541e-14	-0.465173	2.99324	1.10476	3.05002	4.85583	7.82013	12.7166	10.0649	0.0668744	0.598559	0.174131	0.613816	1.17061	2.33745	4.64613	3.36127	0	0	0	0	0	1	1	1
1269	579.147	8.54427	Positive	NA	Unknown	21.9409	21.3823	20.7796	19.1473	19.2965	17.5623	15.0188	11.1332	21.9618	17.2663	18.681	13.6907	14.0132	8.54131	10.3626	-3.70814e-14	-0.0209434	4.11597	2.09855	5.45663	5.28333	9.02104	4.6562	11.1332	0.00258787	0.823828	0.339539	1.22667	1.17125	2.54609	0.978848	3.44255	0	0	0	0	0	1	0	1
1272	334.126	8.04463	Positive	NA	Unknown	18.8524	18.1773	19.5943	18.8052	17.2436	13.5744	11.3201	12.123	16.5752	13.9363	14.3222	14.8134	14.4728	12.6781	11.3827	3.34103	2.27717	4.241	5.27205	3.99177	2.77086	0.896229	-0.0625479	8.78192	0.756213	1.83492	2.51943	1.67989	0.993929	0.229757	0.0132881	5.13842	0	0	1	0	0	0	0	1
1273	310.057	8.10549	Positive	NA	Unknown	18.2237	16.7051	19.3548	18.6836	17.408	16.2851	13.3576	6.94301	19.3211	14.7651	17.5373	14.4922	9.58336	3.70666	-1.77636e-15	-3.81917e-14	-1.09733	1.94003	1.81757	4.19141	7.82469	12.5785	13.3576	6.94301	0.16805	0.33175	0.306049	0.918515	2.25877	4.43123	4.805	1.89739	0	0	0	0	1	1	1	0
1291	239.057	8.41265	Positive	NA	Unknown	11.3305	7.85821	11.1094	11.287	7.80609	11.5095	10.755	7.37007	6.97677	7.29418	3.61834	3.47381	7.01172	5.55112e-16	6.8545	-2.09832e-14	4.35373	0.564034	7.49104	7.81319	0.794377	11.5095	3.90045	7.37007	0.567472	0.0528286	1.20262	1.27756	0.0761026	2.24337	0.490973	1.17491	0	0	0	0	0	1	0	0
1298	172.169	11.4569	Positive	NA	Unknown	22.0375	23.9453	22.6847	22.1569	21.5654	22.6841	20.361	18.8737	21.7021	23.3163	23.4925	22.5729	20.0811	20.6357	20.2485	18.8955	0.335352	0.629008	-0.807724	-0.415944	1.48427	2.04843	0.11253	-0.0217693	0.254552	0.563419	0.790508	0.331237	1.88595	3.01007	0.0740749	0.0134679	0	0	0	0	0	1	0	0
1302	71.0295	0.587964	Positive	NA	Unknown	19.0463	18.346	19.378	18.9431	20.3728	21.292	20.9993	18.5425	18.6113	19.7296	20.1432	20.0425	20.5556	19.3877	20.2838	19.1873	0.43498	-1.38356	-0.765151	-1.09942	-0.182743	1.90425	0.715486	-0.644772	0.351295	1.70825	0.736212	1.22475	0.126349	2.7193	0.671872	0.584142	0	0	0	0	0	1	0	0
1309	225.551	8.12892	Positive	NA	Unknown	16.9031	16.3643	16.6862	16.1917	15.0879	13.6068	15.0265	6.93561	18.5461	16.0668	17.1167	16.1052	13.6417	3.49471	3.4172	-4.72955e-14	-1.64297	0.297412	-0.430458	0.0864163	1.44625	10.1121	11.6093	6.93561	0.320028	0.0469418	0.069466	0.0131598	0.273725	3.96473	4.7852	2.31395	0	0	0	0	0	1	1	1
1311	166.086	6.26461	Positive	C9H11NO2	Phenylalanine	24.853	25.2277	29.2588	26.1312	27.0287	27.7482	25.6623	22.4247	28.1714	33.3516	32.5214	28.5286	27.8372	27.6418	27.2916	23.3027	-3.31842	-8.12387	-3.26261	-2.39734	-0.808489	0.106405	-1.62928	-0.878034	9.09751	19.5834	8.93178	6.22856	1.35436	0.10536	3.7268	1.52623	1	1	1	1	0	0	1	0
1313	303.084	8.76016	Positive	NA	Unknown	17.3974	19.7718	20.4957	21.2333	20.6968	18.5995	15.2156	14.0132	19.1221	16.972	18.0515	17.5073	17.2397	15.7758	13.9337	11.1625	-1.72471	2.79976	2.44425	3.72601	3.45707	2.82369	1.2819	2.85069	0.815823	1.62738	1.33664	2.46806	2.2132	1.64765	0.545897	1.67064	0	0	0	1	1	0	0	0
1314	89.0599	6.83742	Positive	NA	Unknown	20.744	21.7683	20.0048	20.8507	20.4822	20.4796	19.8823	22.5179	19.6653	19.3994	19.4306	19.9698	19.0445	19.1999	19.2149	21.5832	1.07873	2.36881	0.574194	0.880914	1.43772	1.27977	0.667465	0.934778	1.31944	4.09452	0.550136	0.988205	2.00313	1.69046	0.673068	1.07483	0	1	0	0	1	0	0	0
1315	426.048	8.08462	Positive	NA	Unknown	16.2058	16.9929	17.5611	18.6587	17.8597	16.3643	17.0303	9.64687	19.6614	17.8748	19.0231	16.9227	16.2403	14.7062	7.03161	3.40494	-3.45557	-0.881962	-1.46206	1.73605	1.61941	1.65806	9.99874	6.24193	0.709549	0.132059	0.236933	0.291576	0.267912	0.275687	3.24729	1.63994	0	0	0	0	0	0	1	0
1317	148.525	2.38273	Positive	NA	Unknown	9.77226	15.6076	14.0273	16.4114	17.2621	18.0946	19.1573	14.2613	3.62782	3.67459	7.602	13.2725	13.35	11.9483	11.3499	10.4913	6.14444	11.933	6.42532	3.13893	3.91215	6.14633	7.8074	3.77002	1.32709	3.46873	1.41561	0.523859	0.703567	1.32768	1.87929	0.669063	0	1	0	0	0	0	0	0
1329	214.043	7.95584	Positive	NA	Unknown	21.1009	21.8918	23.3981	24.204	23.752	23.0392	23.5266	20.4951	17.5992	15.3423	18.3643	18.9681	19.5569	14.8691	13.7023	7.34832	3.50171	6.54948	5.03378	5.23581	4.19513	8.17011	9.82432	13.1468	1.26801	3.14387	2.14849	2.27527	1.6471	4.2843	5.47735	7.82673	0	1	1	1	0	1	1	1
1336	305.064	6.85191	Positive	NA	Unknown	27.5593	27.6915	26.6439	25.4467	25.5256	26.3396	22.2972	19.6139	24.8908	25.9189	25.3385	23.7336	23.0903	21.0966	19.0537	13.7123	2.66855	1.77259	1.30541	1.71316	2.4353	5.24299	3.24355	5.90157	3.56998	1.97935	1.26944	1.88327	3.13582	8.45599	4.67079	9.61248	1	1	0	0	1	1	1	1
1339	137.059	7.93751	Positive	NA	Unknown	19.174	19.7655	19.9395	20.0605	20.2528	19.8571	18.8454	18.9092	20.8006	21.2324	22.3712	21.5394	20.2062	20.292	18.4039	16.8982	-1.62653	-1.46695	-2.43173	-1.4789	0.0465548	-0.434944	0.441467	2.01103	1.62692	1.40055	2.91914	1.41709	0.0240243	0.276081	0.281127	2.21681	0	0	1	0	0	0	0	1
1368	205.038	8.166	Positive	NA	Unknown	17.7933	17.2165	18.2473	17.6259	15.403	13.8695	15.4159	11.2233	18.0349	15.3285	16.3016	15.593	13.846	10.9545	3.38562	1.39055e-14	-0.241556	1.88802	1.94566	2.03286	1.55698	2.91497	12.0303	11.2233	0.0631718	0.724409	0.754886	0.801895	0.558753	1.33527	9.05485	8.38878	0	0	0	0	0	0	1	1
1370	181.048	8.83691	Positive	NA	Unknown	22.8957	22.1825	21.8823	21.7012	21.5924	20.9685	18.5093	16.2861	22.0777	21.5979	21.2438	20.6077	18.6497	16.6652	14.9789	15.2007	0.817953	0.584573	0.638493	1.0935	2.94265	4.3033	3.53043	1.08537	0.849927	0.538949	0.606048	1.28225	5.24072	8.3302	6.60231	1.26856	0	0	0	0	1	1	1	0
1375	180.086	0.751468	Positive	C6H13NO5	GLUCOSAMINE/MANNOSAMINE	30.6996	30.7311	30.7666	30.5281	29.7927	29.4849	30.2578	25.9389	30.6212	30.5291	30.5835	30.1195	29.8371	29.209	28.1522	24.9891	0.0784657	0.201986	0.18311	0.408507	-0.0444476	0.275943	2.10555	0.949752	0.0640173	0.182305	0.16281	0.429795	0.0352269	0.263708	4.28597	1.36548	0	0	0	0	0	0	1	0
1381	293.064	8.5499	Positive	NA	Unknown	14.1607	16.7841	14.5973	17.1592	17.0138	14.9599	13.4161	14.2749	11.2318	10.726	11.6771	12.9238	13.1486	13.0203	8.29844	10.7147	2.92884	6.0581	2.92018	4.23548	3.86529	1.93967	5.11769	3.5602	0.899368	2.56502	0.895649	1.52318	1.33434	0.514253	2.00658	1.18564	0	1	0	0	0	0	1	0
1388	198.096	0.736888	Positive	NA	Unknown	30.2062	30.136	30.121	29.9974	29.3163	29.1565	29.9386	25.918	29.7383	30.0845	29.7182	29.7999	29.4081	28.9534	28.1883	25.4911	0.4679	0.0515456	0.402793	0.197497	-0.0918422	0.203063	1.75029	0.426844	0.606627	0.0469477	0.497507	0.20596	0.0869417	0.21281	3.95825	0.536893	0	0	0	0	0	0	1	0
1391	593.126	8.31504	Positive	NA	Unknown	21.5087	22.1466	21.3487	21.0288	19.5356	18.784	19.4781	15.2905	14.7898	3.4906	7.81753	8.89257	5.62359	-2.66454e-15	-2.22045e-15	3.47918	6.71886	18.656	13.5312	12.1362	13.912	18.784	19.4781	11.8113	1.17689	5.04837	3.24379	2.77541	3.37415	5.0941	5.34226	2.66877	0	1	1	1	1	1	1	1
1404	273.053	8.08443	Positive	NA	Unknown	10.6321	13.9549	15.3385	17.0296	16.7294	14.8446	15.0332	3.52633	17.724	16.2222	16.2387	15.5697	14.1056	6.97581	0	-1.77636e-14	-7.09191	-2.26732	-0.900208	1.45999	2.62386	7.86881	15.0332	3.52633	1.83074	0.380876	0.127451	0.222317	0.459124	2.13053	5.28774	0.679444	0	0	0	0	0	1	1	0
1406	307.079	9.30525	Positive	NA	Unknown	16.6071	18.1528	17.8205	17.5261	17.401	16.9252	15.3933	12.3777	15.5401	14.5906	14.0559	13.2721	12.845	11.9708	10.4752	3.66088	1.06703	3.56216	3.7646	4.25396	4.55605	4.95435	4.9181	8.7168	0.255949	1.26095	1.36548	1.63023	1.80158	2.03589	2.01419	4.54695	0	0	0	0	0	1	1	1
1409	139.53	0.748178	Positive	NA	Unknown	22.7182	22.1121	22.0335	20.5272	22.3271	23.6691	25.1143	22.4997	20.831	22.6291	21.0933	20.4956	21.8906	24.1538	24.5291	22.3914	1.88724	-0.516931	0.940239	0.0315374	0.436488	-0.484653	0.58524	0.108307	4.0329	0.638254	1.47884	0.0264316	0.509713	0.585397	0.755673	0.0972923	1	0	0	0	0	0	0	0
1440	193.142	7.6932	Positive	NA	Unknown	28.7907	30.5241	28.0525	29.5412	29.2181	28.5943	28.4454	19.8892	25.8086	26.8591	25.869	28.299	27.0548	27.1925	26.8888	20.3021	2.98204	3.665	2.18346	1.24225	2.16322	1.40179	1.55662	-0.412908	2.94962	3.94771	1.87583	0.83642	1.85052	0.990565	1.14943	0.205124	1	1	0	0	0	0	0	0
1453	293.064	9.26671	Positive	NA	Unknown	16.0474	18.3812	16.7242	16.5573	16.39	15.9682	14.7758	12.7577	7.09149	7.94111	3.49646	7.90944	11.9467	6.95949	3.43402	-6.16729e-14	8.95594	10.4401	13.2278	8.64785	4.44328	9.00868	11.3418	12.7577	1.88203	2.35347	3.30929	1.78835	0.695055	1.89822	2.65405	3.14314	0	1	1	0	0	0	1	1
1467	73.0651	6.85131	Positive	NA	Unknown	19.6281	20.5798	18.8119	19.5051	19.0743	18.9935	18.3606	21.2211	18.4303	18.1979	18.2925	18.6386	17.1091	17.5827	17.3221	20.2723	1.19779	2.38187	0.519393	0.866462	1.96513	1.41088	1.0385	0.948801	1.209	3.27216	0.389845	0.766769	2.48131	1.53133	0.98691	0.869487	0	1	0	0	1	0	0	0
1474	130.049	1.78474	Positive	C5H7NO3	Pyroglutamic Acid	25.655	26.0521	25.1098	25.8923	26.4972	25.1863	24.091	24.7847	25.5122	25.6301	25.6048	26.7642	26.2067	25.1177	25.3593	25.0185	0.142789	0.422071	-0.495028	-0.871975	0.290475	0.0685498	-1.26834	-0.233784	0.131002	0.482684	0.595713	1.31074	0.300936	0.0589181	2.26027	0.231471	0	0	0	0	0	0	1	0
1476	121.966	0.585972	Positive	NA	Unknown	18.564	19.3992	20.2101	20.5119	18.92	19.391	19.649	18.8104	16.9997	18.2175	17.5923	19.4306	19.2315	19.2483	16.696	19.5729	1.56432	1.18176	2.6178	1.08132	-0.311443	0.14279	2.95299	-0.762505	1.18532	0.798665	2.50298	0.706994	0.150945	0.0641073	2.97846	0.444819	0	0	1	0	0	0	1	0
1478	283.01	2.33786	Positive	NA	Unknown	11.2383	11.41	11.9686	12.5125	13.8379	14.3949	16.5735	10.0219	7.33901	0	3.75312	11.141	7.8911	11.5014	11.1234	11.8964	3.89928	11.41	8.21544	1.3715	5.94677	2.89348	5.45007	-1.87444	0.924372	4.30793	2.7101	0.238762	1.69316	0.613809	1.49154	0.349755	0	1	1	0	0	0	0	0
1482	334.234	11.2328	Positive	NA	Unknown	4.03958	14.0597	9.0006	7.06135	3.74534	3.58015	3.44339	17.1605	13.9873	18.02	18.8972	15.0124	11.8158	13.3638	12.2569	17.7073	-9.94777	-3.96028	-9.89659	-7.95107	-8.07042	-9.78365	-8.81354	-0.546791	2.11507	0.575603	2.09921	1.52597	1.55935	2.06436	1.77268	0.057152	1	0	1	0	0	1	0	0
1496	427.1	8.28637	Positive	NA	Unknown	17.5539	18.1263	16.4651	18.8665	18.5447	17.3143	16.6339	11.182	9.95053	7.4049	7.38111	4.01781	8.5966	-4.44089e-16	2.22045e-16	-1.88738e-14	7.60336	10.7214	9.08398	14.8487	9.94812	17.3143	16.6339	11.182	1.4851	2.44971	1.92418	3.8983	2.19689	4.80678	4.55471	2.60382	0	1	0	1	1	1	1	1
1525	181.048	9.28802	Positive	NA	Unknown	20.1724	20.2688	18.4247	18.8394	19.2451	18.3961	16.0062	14.2838	19.2057	19.0855	19.0812	18.3537	16.7687	16.7899	15.2413	14.5128	0.966747	1.18329	-0.656451	0.48567	2.47634	1.6062	0.764897	-0.228945	0.607268	0.799555	0.367329	0.253559	2.30719	1.2302	0.446336	0.106878	0	0	0	0	1	0	0	0
1530	334.234	11.2828	Positive	NA	Unknown	4.03958	13.766	9.0006	7.04077	3.74534	1.77636e-15	3.44339	18.7744	13.9873	19.7397	19.3873	15.0124	11.8158	13.3638	12.0134	17.9616	-9.94777	-5.97369	-10.3867	-7.97165	-8.07042	-13.3638	-8.56998	0.812788	2.33859	1.11654	2.49005	1.6933	1.72395	3.57261	1.88173	0.0942689	1	0	1	0	0	1	0	0
1543	283.011	6.39158	Positive	NA	Unknown	12.0197	12.1241	12.1435	15.7728	16.8304	15.4824	15.438	11.2363	11.7829	13.3617	13.9194	14.1724	14.3054	12.207	7.30003	-3.01981e-14	0.236761	-1.23757	-1.77591	1.60041	2.52491	3.27537	8.13795	11.2363	0.0572374	0.37778	0.604281	0.526306	0.980444	1.42248	5.18666	7.73214	0	0	0	0	0	0	1	1
1575	163.038	7.92049	Positive	NA	Unknown	24.1661	24.4228	24.4435	23.8521	23.2558	22.8052	19.7682	19.2314	22.5414	22.3634	22.2986	21.3203	20.6527	18.5351	16.787	14.0112	1.62475	2.05946	2.1449	2.5318	2.60304	4.27008	2.98123	5.22019	2.24803	3.16618	3.35458	4.22806	4.39136	8.16768	5.26335	10.1421	1	1	1	1	1	1	1	1
1611	455.096	8.08019	Positive	NA	Unknown	21.0825	20.4391	21.9256	21.4002	19.8779	17.6525	15.7297	10.4356	21.4294	16.2567	19.1123	14.6916	13.2685	3.41085	2.88658e-15	2.33147e-14	-0.346869	4.18244	2.81335	6.70851	6.60937	14.2416	15.7297	10.4356	0.0749877	1.68232	0.952203	3.33537	3.26558	8.73499	9.71763	6.05046	0	0	0	1	1	1	1	1
1612	130.016	0.588799	Positive	NA	Unknown	23.0278	22.6531	23.2746	22.9498	24.3766	25.3815	25.0076	22.4238	22.5683	23.6696	24.1329	23.9748	24.4349	23.4597	24.1048	23.1061	0.459501	-1.01655	-0.858296	-1.02495	-0.0583638	1.92177	0.902852	-0.6823	0.43501	1.28844	1.012	1.30379	0.041794	3.24312	1.0873	0.73525	0	0	0	0	0	1	0	0
1613	330.571	8.08518	Positive	NA	Unknown	21.8403	21.3188	22.5549	22.1226	20.8224	19.6608	17.8692	3.87479	22.3854	19.2668	20.802	18.1362	16.6457	4.29342	-1.77636e-15	-1.42109e-14	-0.545104	2.05203	1.75291	3.98641	4.17665	15.3674	17.8692	3.87479	0.0915046	0.433763	0.355145	1.0665	1.13968	7.00208	8.34268	1.02442	0	0	0	0	0	1	1	0
1615	206.046	8.07706	Positive	NA	Unknown	22.132	21.7969	22.7112	22.613	21.937	21.1412	20.7811	17.3276	22.8921	21.517	22.1621	21.1028	20.4911	18.2932	16.1287	3.90799e-14	-0.760144	0.279912	0.549077	1.51016	1.44587	2.84804	4.65244	17.3276	0.690984	0.196521	0.448993	1.83118	1.71865	4.52726	8.33757	24.085	0	0	0	0	0	1	1	1
1618	83.5361	0.588154	Positive	NA	Unknown	21.312	20.947	21.5877	21.2115	22.5709	23.5419	23.23	20.7714	20.9148	21.9636	22.3975	22.2433	22.7101	21.6704	22.4826	21.4742	0.397144	-1.01663	-0.809863	-1.03179	-0.139191	1.87149	0.74735	-0.702756	0.357642	1.27318	0.921639	1.30061	0.104967	3.08574	0.824	0.756925	0	0	0	0	0	1	0	0
1619	153.032	0.588311	Positive	NA	Unknown	21.3532	20.9767	21.5833	21.2687	22.6961	23.7051	23.3248	20.7318	20.9242	21.9726	22.4903	22.2846	22.7559	21.8077	22.4169	21.4505	0.429085	-0.995893	-0.906919	-1.01591	-0.0597796	1.89739	0.907846	-0.718678	0.397026	1.24561	1.08963	1.28175	0.0427209	3.17114	1.09122	0.78643	0	0	0	0	0	1	0	0
1622	152.035	0.587994	Positive	NA	Unknown	21.0871	20.68	21.315	20.9668	22.4156	23.4587	23.0567	20.4753	20.6049	21.7187	22.2107	22.0148	22.4495	21.5517	22.1762	21.1439	0.482273	-1.03866	-0.895753	-1.04801	-0.0339432	1.90707	0.880523	-0.668589	0.458051	1.3131	1.06248	1.33016	0.0236486	3.16988	1.03695	0.707015	0	0	0	0	0	1	0	0
1623	106.004	0.588536	Positive	NA	Unknown	20.9858	20.5831	21.2336	20.8766	22.334	23.3727	23	20.3454	20.4747	21.6061	22.0849	21.9248	22.4102	21.4048	22.0609	21.0242	0.511128	-1.023	-0.851294	-1.04818	-0.0762195	1.96791	0.939081	-0.678805	0.484605	1.25778	0.968334	1.30256	0.0539977	3.24612	1.11277	0.707447	0	0	0	0	0	1	0	0
1627	351.084	8.08767	Positive	NA	Unknown	17.5145	16.7578	19.0136	18.2906	16.459	14.5916	3.65786	1.74305e-14	19.6346	15.6719	17.535	13.2791	9.61493	3.39191	-5.55112e-16	-2.33147e-15	-2.1201	1.08583	1.47853	5.01156	6.84405	11.1996	3.65786	1.9762e-14	0.374287	0.167482	0.240466	1.1961	1.87874	3.81632	0.768312	0	0	0	0	0	0	1	0	0
1632	73.5321	0.588181	Positive	NA	Unknown	19.769	19.0182	20.2362	19.8333	21.0594	22.2809	22.1326	18.6984	18.8857	20.4282	20.9178	21.018	21.5527	19.9705	21.2499	20.0804	0.883373	-1.41003	-0.681523	-1.18472	-0.493292	2.31047	0.882629	-1.38199	0.675551	1.3011	0.478569	1.01473	0.317643	2.66717	0.67478	1.26403	0	0	0	0	0	1	0	0
1633	123.04	0.587544	Positive	NA	Unknown	19.745	19.2515	19.9304	19.5302	21.0811	22.08	21.6435	19.1711	19.2647	20.4242	20.8337	20.6949	21.1382	20.1327	20.8617	19.6476	0.480358	-1.17272	-0.903344	-1.16466	-0.0570309	1.94729	0.781839	-0.476471	0.43984	1.50417	1.03422	1.48921	0.0393021	3.14025	0.844454	0.435266	0	0	0	0	0	1	0	0
1637	174.024	0.588861	Positive	NA	Unknown	20.0441	19.6953	20.1601	19.9365	21.3759	22.3056	21.8221	19.4772	19.655	20.6552	21.1611	20.834	21.2725	20.6005	20.8902	20.0483	0.389104	-0.959907	-1.00099	-0.897514	0.103437	1.70511	0.93191	-0.57112	0.371339	1.2603	1.3387	1.14461	0.0802069	2.9022	1.20788	0.611583	0	0	0	0	0	1	0	0
1638	87.9937	0.58846	Positive	NA	Unknown	19.7735	19.3515	19.9745	19.6741	21.1018	22.1722	21.8079	19.1407	19.2139	20.3592	20.8752	20.6941	21.1464	20.1685	20.8899	19.8491	0.559527	-1.00774	-0.900783	-1.01997	-0.0446155	2.00363	0.918061	-0.708367	0.535572	1.20608	1.02791	1.22713	0.0304168	3.26361	1.05597	0.735457	0	0	0	0	0	1	0	0
1640	153.054	8.18918	Positive	C8H8O3	Resorcinol monoacetate	20.7687	20.746	20.5818	20.8213	20.9842	20.9147	20.0402	19.9673	19.3536	18.6819	19.3549	21.9265	20.7495	20.6313	19.5756	18.5108	1.41512	2.06406	1.22682	-1.10524	0.234682	0.283383	0.464613	1.45648	1.43998	2.49464	1.17239	1.01068	0.143003	0.177425	0.320293	1.50138	0	1	0	0	0	0	0	0
1646	205.053	7.51884	Positive	NA	Unknown	20.656	20.4183	21.59	21.8733	21.0866	20.7385	20.2506	11.6019	22.4233	22.3782	22.3281	22.1363	21.5025	20.0732	16.5549	3.33163	-1.76729	-1.95989	-0.738119	-0.262968	-0.415931	0.66537	3.69569	8.27023	0.723013	0.833735	0.237163	0.0741428	0.122468	0.209716	2.07139	6.31199	0	0	0	0	0	0	1	1
1653	91.5424	0.587831	Positive	NA	Unknown	18.3592	17.4858	18.5575	18.206	19.7253	20.6991	20.2962	17.8073	17.9905	19.1049	19.5534	19.2337	19.7141	18.9167	19.4502	18.5056	0.368644	-1.61909	-0.995908	-1.02769	0.0112448	1.78243	0.845992	-0.698264	0.277678	2.07103	1.02626	1.073	0.00674921	2.38229	0.816634	0.628404	0	1	0	0	0	1	0	0
1669	157.014	0.605728	Positive	NA	Unknown	17.975	16.2506	18.5646	18.0765	19.7128	20.7606	20.4368	17.3975	17.731	18.9775	19.5184	19.3691	19.8471	18.7099	19.5032	18.2356	0.243972	-2.7269	-0.953807	-1.29268	-0.134341	2.05065	0.933623	-0.838116	0.132578	3.19816	0.710809	1.08605	0.068971	2.11803	0.6904	0.596903	0	1	0	0	0	1	0	0
1691	186.034	0.652785	Positive	NA	Unknown	15.6344	15.7126	13.9546	17.2411	19.0711	16.53	14.0266	11.393	17.3352	16.7911	17.2256	19.0558	19.1191	18.0441	16.7288	15.3539	-1.70088	-1.0785	-3.27102	-1.81472	-0.04806	-1.51403	-2.7022	-3.96082	1.18343	0.628049	3.05397	1.29879	0.0189223	1.00292	2.31717	3.99932	0	0	1	0	0	0	1	1
1692	197.042	7.98584	Positive	NA	Unknown	17.3108	18.3618	18.5862	19.3626	19.5575	17.543	16.237	15.2637	18.3895	16.4781	17.6453	16.0847	14.8363	12.0129	11.3884	11.1614	-1.07865	1.88375	0.940934	3.27795	4.72128	5.53003	4.84861	4.1023	0.525422	1.13038	0.439825	2.52435	4.23398	5.23402	4.39067	3.48188	0	0	0	1	1	1	1	1
1701	176.049	7.54942	Positive	NA	Unknown	15.1625	14.3256	15.3628	16.5549	16.2549	15.2525	15.0752	10.6996	17.9538	18.5151	18.5136	17.6142	17.1506	15.0073	12.6224	10.7738	-2.79125	-4.18949	-3.15086	-1.05931	-0.89568	0.245234	2.45286	-0.0741783	3.80127	6.49704	4.49076	0.942973	0.746984	0.149167	3.16752	0.0408965	1	1	1	0	0	0	1	0
1723	181.049	7.95046	Positive	NA	Unknown	22.212	23.1642	22.9188	23.1225	23.124	22.5459	21.68	19.702	21.8524	22.5342	22.4753	22.4961	21.7733	19.7284	18.2242	15.9569	0.359667	0.629993	0.443578	0.626392	1.35071	2.81742	3.45576	3.74517	0.202145	0.400527	0.259383	0.397617	1.123	3.2544	4.32766	4.824	0	0	0	0	0	1	1	1
1738	209.189	12.0735	Positive	NA	Unknown	22.6944	25.1371	24.1987	25.0623	22.2755	22.6325	21.1364	19.7238	20.6048	22.547	23.5491	23.6638	20.929	21.3858	21.3846	22.5043	2.08961	2.59012	0.649546	1.39854	1.34645	1.2467	-0.248212	-2.78049	2.92351	3.96039	0.557393	1.63082	1.54328	1.38041	0.170402	4.36583	1	1	0	0	0	0	0	1
1760	281.112	7.40153	Positive	NA	Unknown	17.3045	16.3602	-1.77636e-15	3.57826	3.54058	3.35648	-1.77636e-15	3.55411	17.4637	7.46963	14.1763	16.3537	11.9134	11.574	12.6079	3.38141	-0.159212	8.89052	-14.1763	-12.7754	-8.37277	-8.21756	-12.6079	0.172704	0.0179166	2.12202	4.13295	3.57576	1.94417	1.89181	3.50993	0.0194678	0	1	1	1	0	0	1	0
1770	122.081	0.691955	Positive	NA	Unknown	18.7507	17.5921	17.8815	19.6269	20.3202	21.0671	21.4089	17.4704	16.9762	18.4691	20.8505	21.5513	21.2336	20.9593	19.6867	17.8054	1.77447	-0.876923	-2.969	-1.92449	-0.913365	0.107776	1.72221	-0.334988	1.54355	0.575632	3.25602	1.73702	0.6078	0.0505425	1.47802	0.175164	0	0	1	0	0	0	0	0
1783	595.142	7.52017	Positive	NA	Unknown	25.249	25.12	25.1621	24.43	24.2435	24.1352	21.9294	11.8243	23.4059	21.9182	21.249	19.964	20.2045	16.622	15.0736	3.50145	1.84312	3.20173	3.91319	4.46603	4.03902	7.51322	6.85579	8.32287	0.630174	1.3648	1.82672	2.21505	1.91304	4.62751	4.0845	5.30046	0	0	0	1	0	1	1	1
1793	334.235	11.4361	Positive	NA	Unknown	7.42489	12.7041	12.326	7.08044	11.6081	17.3655	17.7816	17.5289	14.354	17.6973	16.7204	14.7371	11.7223	11.8409	13.1195	17.2944	-6.92913	-4.99317	-4.39442	-7.65668	-0.114187	5.52454	4.66211	0.234552	2.45461	1.52298	1.26626	2.83606	0.0182276	1.76441	1.37892	0.0382476	1	0	0	1	0	0	0	0
1798	109.539	1.30289	Positive	NA	Unknown	15.749	17.4812	18.6359	17.3122	17.7414	18.3051	18.7712	17.7163	18.5918	18.7826	16.5447	17.6324	16.7667	17.8087	17.8476	17.544	-2.84281	-1.3014	2.09118	-0.320174	0.974643	0.496372	0.923562	0.172352	2.14748	0.7046	1.37368	0.126002	0.479353	0.208263	0.447054	0.0641364	1	0	0	0	0	0	0	0
1839	179.063	8.84843	Positive	NA	Unknown	20.3827	21.7639	21.4847	19.9109	19.6541	19.6001	19.7206	18.9137	20.1991	20.4848	20.3135	20.2167	20.0047	19.4107	19.4108	19.3753	0.183597	1.27913	1.17126	-0.305796	-0.350557	0.189425	0.309839	-0.461556	0.276131	3.98475	3.52326	0.526326	0.631299	0.286843	0.535517	0.921344	0	1	1	0	0	0	0	0
1872	337.233	12.1778	Positive	NA	Unknown	21.5804	22.8039	21.5106	22.8453	23.689	23.2389	22.9518	21.222	19.056	21.5023	21.4991	23.4507	22.064	23.3544	22.5937	18.544	2.52444	1.30154	0.0114874	-0.605432	1.62509	-0.115529	0.358124	2.67805	2.50275	0.961165	0.00502659	0.347533	1.31895	0.0532091	0.184763	2.7262	1	0	0	0	0	0	0	1
1878	205.036	1.32891	Positive	NA	Unknown	16.7793	18.9801	18.1789	17.5757	17.9069	17.6191	17.8272	17.287	17.6108	17.7108	15.9739	18.1596	16.7513	16.9215	17.8919	17.1225	-0.831523	1.26927	2.20499	-0.583868	1.1556	0.697558	-0.0646851	0.164539	0.510453	0.905931	2.00477	0.325208	0.795142	0.406719	0.0285537	0.0761776	0	0	1	0	0	0	0	0
1893	116.546	6.09695	Positive	NA	Unknown	22.6678	24.0198	20.9425	22.4828	22.5453	21.7931	22.0755	17.4911	19.731	20.489	17.4198	21.0926	19.501	20.224	20.1011	18.2656	2.93685	3.53078	3.52264	1.39014	3.04434	1.56905	1.97445	-0.774487	2.49115	3.24704	3.2364	0.849043	2.62438	1.00609	1.39778	0.390086	1	1	1	0	1	0	0	0
1910	142.158	7.39826	Positive	NA	Unknown	18.6278	18.491	18.6646	18.8074	18.5901	18.9604	19.0212	16.5853	19.1877	18.8614	19.0063	18.6498	18.7134	17.4596	18.515	18.8133	-0.559972	-0.370428	-0.341703	0.15758	-0.12336	1.50074	0.506206	-2.22806	0.561554	0.330361	0.299027	0.121262	0.0925619	2.2624	0.49168	3.9792	0	0	0	0	0	1	0	1
1927	305.064	8.28884	Positive	NA	Unknown	25.9623	26.2307	25.0371	23.7451	24.2219	25.8496	20.7814	16.4172	18.264	15.8796	19.0532	18.0919	18.3375	16.4998	12.798	15.0489	7.69826	10.3512	5.98389	5.65321	5.88436	9.34986	7.98342	1.36836	5.37927	7.74465	3.8286	3.53553	3.74003	6.86662	5.63825	0.47822	1	1	1	1	1	1	1	0
2069	116.07	0.829634	Positive	C5H9NO2	L-PROLINE	24.6538	25.0375	24.6367	25.0251	25.9506	26.0476	23.9224	22.386	26.7843	26.5715	26.7032	27.5797	27.2413	27.3693	26.8324	24.7136	-2.13054	-1.53394	-2.0665	-2.5546	-1.2907	-1.32169	-2.90997	-2.32766	4.61923	2.91831	4.43241	5.8597	2.27273	2.35256	6.88658	5.19616	1	1	1	1	1	1	1	1
2093	162.112	0.940924	Positive	C7H15NO3	L-CARNITINE	23.4098	23.9811	23.8384	22.2002	21.6931	22.9425	21.8111	23.1784	24.9429	26.1568	26.1412	24.7087	23.506	22.6649	21.6647	25.6691	-1.53311	-2.17564	-2.30287	-2.50853	-1.81287	0.277627	0.146467	-2.49072	2.12496	3.51802	3.80978	4.28744	2.71088	0.21556	0.104125	4.24585	1	1	1	1	1	0	0	1
2121	97.0284	0.697398	Positive	NA	Unknown	29.618	29.9228	30.0262	29.4007	28.2144	26.9853	27.8867	23.3014	29.6571	30.0074	29.5805	29.38	28.2355	26.4998	25.5275	24.3056	-0.0391209	-0.0846189	0.445703	0.0207216	-0.021121	0.485436	2.35926	-1.00417	0.0175059	0.0387308	0.241489	0.00918743	0.00936641	0.267624	2.29642	0.679374	0	0	0	0	0	0	1	0
2148	132.101	2.49462	Positive	C6H13NO2	L-LEUCINE	27.5679	27.4616	26.846	25.9919	26.9099	26.9775	25.4244	21.7881	29.1534	30.5956	30.4055	28.3966	27.6585	27.5847	27.6963	24.26	-1.58553	-3.13407	-3.55953	-2.40476	-0.748638	-0.607195	-2.27192	-2.47192	2.82264	7.03691	8.16232	5.0368	0.95473	0.714201	4.6693	5.22273	1	1	1	1	0	0	1	1
2165	132.101	2.18556	Positive	C6H13NO2	L-Isoleucine	26.5656	27.3991	26.7376	26.8354	27.7342	27.2312	25.6977	22.1046	28.3025	29.5126	29.4131	29.4836	28.7261	27.6134	27.4146	23.9685	-1.73687	-2.11353	-2.67549	-2.64811	-0.991873	-0.382249	-1.7169	-1.86383	3.2851	4.31975	5.89576	5.81916	1.45808	0.395822	3.23151	3.62934	1	1	1	1	0	0	1	1
2201	169.959	0.587452	Positive	NA	Unknown	20.5371	20.5719	20.3581	20.9422	21.0022	20.2593	20.1776	20.1453	19.8814	20.1374	19.9912	20.0794	19.6435	19.9486	19.8877	20.6838	0.6557	0.434576	0.36688	0.86278	1.35871	0.310735	0.28997	-0.538496	1.22322	0.687908	0.548136	1.82064	3.50889	0.441278	0.403866	0.924992	0	0	0	0	1	0	0	0
2243	134.117	1.17601	Positive	NA	Unknown	20.8318	22.8299	21.8568	22.9079	21.1372	20.7897	19.5225	20.0104	22.1524	25.9841	26.3868	25.492	23.1387	23.1777	21.1645	19.6837	-1.32055	-3.1542	-4.53	-2.58411	-2.00155	-2.38803	-1.64202	0.326742	0.625231	2.15075	3.61963	1.60831	1.11287	1.43427	0.842175	0.114921	0	1	1	0	0	0	0	0
2254	144.101	1.07555	Positive	C7H13NO2	Stachydrine	22.8513	20.3191	22.3508	22.1407	23.4687	23.7452	20.4014	27.2049	22.4439	22.5964	22.7453	25.322	24.6029	23.6274	23.2227	28.8455	0.407316	-2.27731	-0.39446	-3.18131	-1.13426	0.117769	-2.82124	-1.64063	0.15425	1.42148	0.148721	2.31274	0.539421	0.0402324	1.9412	0.890985	0	0	0	1	0	0	0	0
2274	203.051	0.737099	Positive	NA	Unknown	30.1737	29.981	29.9904	30.2152	29.9816	29.7996	30.6934	26.0007	29.7098	29.6651	29.61	29.7918	29.9006	29.5555	28.8676	25.3856	0.463879	0.315945	0.380374	0.423383	0.0810076	0.244116	1.82582	0.615093	0.59786	0.363363	0.460433	0.529588	0.0757169	0.264415	4.1828	0.879177	0	0	0	0	0	0	1	0
2284	182.116	7.36122	Positive	NA	Unknown	19.7429	20.1729	20.3206	19.1694	19.2071	18.4003	18.0944	20.768	19.2162	19.7347	22.6611	19.8917	20.1637	19.7446	19.4379	20.5907	0.526635	0.438118	-2.34054	-0.722241	-0.956587	-1.34431	-1.34351	0.177263	0.35073	0.279483	2.77402	0.526064	0.768012	1.23997	1.2389	0.0986991	0	0	1	0	0	0	0	0
2296	182.08	3.35663	Positive	C9H11NO3	2-Hydroxyphenylalanine	24.2359	24.2459	24.3554	23.4504	23.9728	24.8714	23.3749	22.1743	25.4967	24.7993	24.4738	24.2935	24.3263	24.8207	24.4405	22.4959	-1.26076	-0.553373	-0.118375	-0.843134	-0.353458	0.0507331	-1.06557	-0.321629	4.1376	1.26507	0.172628	2.33299	0.675404	0.0676069	3.26938	0.594815	1	0	0	0	0	0	1	0
2340	185.532	8.44839	Positive	NA	Unknown	17.8317	18.5278	18.6732	19.58	19.3135	18.7711	18.3992	15.9698	13.7867	4.03727	13.8688	12.5662	9.47154	2.33147e-15	3.49566	-5.03486e-14	4.045	14.4906	4.80437	7.01384	9.84198	18.7711	14.9035	15.9698	0.797604	4.90552	1.0145	1.74928	2.86266	6.82001	5.0915	5.57155	0	1	0	0	1	1	1	1
2341	194.538	8.44121	Positive	NA	Unknown	16.6795	17.7772	17.6548	18.6562	18.2675	17.7026	16.9144	13.5392	14.2691	3.58614	12.3287	8.47803	5.86993	3.39045	3.50562	-6.3935e-14	2.41041	14.1911	5.3261	10.1781	12.3975	14.3122	13.4088	13.5392	0.306205	3.54451	0.8658	2.19734	2.92438	3.58714	3.27124	3.31653	0	1	0	1	1	1	1	1
2344	165.054	8.25229	Positive	C9H8O3	4-COUMARATE	22.0635	22.3701	22.2533	21.8958	20.8593	19.714	18.5914	18.2958	20.8791	20.9394	20.15	20.6541	20.4483	19.2738	17.4924	16.8166	1.18447	1.4307	2.10334	1.24172	0.411055	0.440169	1.09903	1.47917	1.18087	1.5508	2.71721	1.26359	0.28946	0.314846	1.06135	1.62775	0	0	1	0	0	0	0	0
2350	290.073	8.37826	Positive	NA	Unknown	20.555	22.0943	22.0688	21.3562	21.1997	20.7669	19.3876	14.7399	21.3264	20.6502	21.005	20.6267	20.2919	18.4795	16.5935	3.53978	-0.77143	1.4441	1.06381	0.729476	0.907853	2.28745	2.79416	11.2001	0.215296	0.467318	0.317365	0.20159	0.261492	0.86795	1.15124	7.80931	0	0	0	0	0	0	0	1
2359	144.065	0.740747	Positive	NA	Unknown	29.0016	29.4995	29.3693	28.7236	27.5525	26.4503	26.9043	23.2766	29.3718	29.5972	29.6491	29.2588	27.9202	26.0391	24.6554	23.3517	-0.370169	-0.0976973	-0.279772	-0.53516	-0.367645	0.411215	2.24885	-0.075159	0.393129	0.0835642	0.277646	0.636688	0.389731	0.449783	4.86943	0.0630454	0	0	0	0	0	0	1	0
2361	203.543	8.38366	Positive	NA	Unknown	12.3978	11.6547	16.1357	15.3551	14.3321	14.1153	10.9902	-4.44089e-16	12.8722	12.011	12.0824	12.2474	11.4346	7.04531	-4.44089e-16	-1.37668e-14	-0.474365	-0.356283	4.05331	3.10769	2.89749	7.06994	10.9902	1.33227e-14	0.135322	0.0984615	2.22781	1.51278	1.3669	4.88278	8.40049	0	0	0	1	0	0	1	1	0
2364	306.095	8.42352	Positive	NA	Unknown	13.605	13.7801	14.217	15.1909	13.8371	11.5768	7.34318	10.9962	11.7426	10.8816	12.1404	14.054	12.7665	12.1291	11.2713	3.52731	1.86236	2.89859	2.07658	1.13692	1.07064	-0.552307	-3.92808	7.46886	0.453344	0.819862	0.522494	0.245399	0.228422	0.107212	1.25967	3.19754	0	0	0	0	0	0	0	1
2373	198.058	8.46421	Positive	NA	Unknown	14.859	14.9538	15.6898	16.4048	15.9404	15.5936	14.5203	7.64344	14.9589	15.474	15.9211	11.3208	8.44611	-8.88178e-16	3.57654	2.42029e-14	-0.0999534	-0.520146	-0.23132	5.08406	7.49428	15.5936	10.9438	7.64344	0.0138191	0.0766746	0.032637	1.27884	2.24784	6.18196	3.86505	2.31328	0	0	0	0	1	1	1	1
2382	225.551	8.20354	Positive	NA	Unknown	17.7025	16.6307	17.2865	16.5736	15.0498	13.1877	13.2422	3.43769	16.695	13.9715	15.0789	15.2223	12.4262	3.49471	-8.88178e-16	-2.04281e-14	1.00753	2.65923	2.20759	1.35127	2.6236	9.693	13.2422	3.43769	0.228659	0.792478	0.615095	0.326535	0.777872	4.9888	7.3785	1.13669	0	0	0	0	0	1	1	0
2528	226.127	0.752991	Positive	NA	Unknown	24.6751	24.6358	24.6114	24.8392	24.6561	24.2429	24.9392	23.9263	23.9289	24.0357	24.1497	24.0682	24.2741	24.623	24.3412	22.6961	0.746255	0.60007	0.461663	0.770967	0.382076	-0.380094	0.597992	1.23018	2.39107	1.74006	1.19069	2.50693	0.91072	0.904116	1.73128	4.83179	0	0	0	0	0	0	0	1
2570	116.546	6.49355	Positive	NA	Unknown	23.4037	24.7982	21.7595	23.5676	23.6504	22.8399	23.5428	18.9004	22.6671	22.1151	19.4953	22.5965	21.0009	21.7433	21.679	19.6742	0.736608	2.68305	2.26427	0.971098	2.64948	1.09663	1.86383	-0.773824	0.526804	3.28457	2.574	0.764245	3.22627	0.904653	1.93889	0.562275	0	1	1	0	1	0	0	0
2576	208.115	7.6447	Positive	NA	Unknown	23.9616	23.0407	23.4496	23.1871	24.3055	24.6542	24.209	23.2198	26.2727	26.1269	25.4358	25.1132	24.5806	25.2492	25.3942	24.5881	-2.31102	-3.08614	-1.98621	-1.92602	-0.275061	-0.594965	-1.18519	-1.36831	5.53124	7.87629	4.52684	4.34154	0.296157	0.809439	2.17519	2.68006	1	1	1	1	0	0	1	1
2578	135.095	0.890522	Positive	NA	Unknown	22.8449	22.2337	22.4629	22.236	22.4034	23.1338	21.8387	21.6365	23.7522	23.0347	22.4255	22.9347	22.4025	23.0829	23.0508	23.5851	-0.907352	-0.800994	0.0374548	-0.698665	0.000872255	0.050928	-1.21206	-1.94853	1.17116	0.9811	0.0277041	0.810558	0.000626139	0.0380831	1.78054	3.53545	0	0	0	0	0	0	0	1
2583	142.164	2.47552	Positive	NA	Unknown	24.4325	23.6591	23.7215	23.6598	24.8735	25.2985	24.7048	23.4948	26.2924	26.1677	25.7076	25.7387	25.3384	25.7789	25.6515	25.1298	-1.85995	-2.50867	-1.98603	-2.07884	-0.464867	-0.48031	-0.946719	-1.63508	5.2735	7.63648	5.7402	6.08239	0.738773	0.772691	2.03928	4.44102	1	1	1	1	0	0	0	1
2585	138.121	2.49465	Positive	NA	Unknown	24.4796	23.5587	23.8213	23.6724	24.929	25.2969	24.7903	23.6681	26.3723	26.3192	25.7537	25.9223	25.5349	25.7842	25.893	25.2997	-1.89264	-2.76051	-1.93235	-2.24983	-0.605903	-0.487291	-1.10277	-1.63161	4.41373	7.15648	4.53974	5.55099	0.864994	0.641636	2.04452	3.59442	1	1	1	1	0	0	1	1
2586	172.106	6.2751	Positive	NA	Unknown	23.4638	22.6876	22.8137	22.6415	23.9382	24.4381	23.7556	22.3038	25.6017	25.2867	24.9903	24.913	24.4112	24.8608	24.7672	23.9617	-2.13784	-2.59914	-2.17666	-2.27144	-0.473001	-0.42277	-1.01165	-1.65794	6.1898	7.82796	6.33017	6.67127	0.742146	0.637119	2.20091	4.44015	1	1	1	1	0	0	1	1
2587	198.105	7.89999	Positive	NA	Unknown	25.0267	24.8421	25.1571	25.2101	25.2448	24.9844	25.5085	25.9853	25.9337	26.1061	25.8839	26.0069	25.9011	25.9183	26.093	25.9135	-0.907039	-1.26407	-0.726795	-0.796733	-0.656309	-0.933936	-0.58454	0.0717846	8.29615	11.698	6.38457	7.13897	5.61296	8.57127	4.82223	0.270898	0	1	0	0	0	0	0	0
2589	175.118	0.698817	Positive	C6H14N4O2	L-ARGININE	19.499	19.8644	19.4542	20.0593	22.5521	23.6715	22.0894	18.2193	21.2456	19.6224	20.6665	21.7494	21.9702	20.5222	21.5357	18.6137	-1.74663	0.241913	-1.21228	-1.69003	0.581885	3.14935	0.553663	-0.39439	1.77376	0.137192	1.04766	1.69062	0.390401	4.13311	0.366633	0.241852	0	0	0	0	0	1	0	0
2592	147.028	1.88152	Positive	NA	Unknown	24.4969	24.0948	24.921	24.8357	24.7516	25.5072	23.4928	19.3622	21.8975	21.373	21.8102	22.7083	22.9291	21.7644	21.3859	19.0209	2.59937	2.72183	3.11074	2.12741	1.8225	3.74277	2.10686	0.341267	8.68512	9.13196	10.4948	6.89038	5.68297	12.5278	6.80995	0.541382	1	1	1	1	1	1	1	0
2594	205.096	7.66635	Positive	C11H12N2O2	Tryptophan	24.1963	24.5607	24.3837	24.3242	24.6618	24.4616	23.5648	21.718	26.3492	26.881	26.3941	26.192	24.7838	24.5507	24.8884	21.6866	-2.15285	-2.32039	-2.01038	-1.86782	-0.12201	-0.0890971	-1.3236	0.0313894	5.75601	6.32597	5.26847	4.78004	0.128977	0.0911197	2.95885	0.0302408	1	1	1	1	0	0	1	0
2597	132.065	0.719605	Positive	C5H9NO3	4-HYDROXYPROLINE	22.6466	22.3367	21.9258	23.0904	24.111	23.9685	22.3797	18.9431	23.6472	23.3714	23.8904	24.7606	24.7516	24.951	24.3402	21.084	-1.00052	-1.03474	-1.96459	-1.67015	-0.640644	-0.982575	-1.96043	-2.14082	1.44203	1.51408	3.81852	3.03508	0.767102	1.40475	3.80727	4.29923	0	0	1	1	0	0	1	1
2599	212.007	1.89117	Positive	NA	Unknown	22.6459	22.2673	23.5062	23.2908	23.1575	24.4027	21.1707	7.60643	17.39	16.4743	15.9422	19.4978	19.9784	17.4662	16.8106	-3.03091e-14	5.25587	5.79303	7.56395	3.79301	3.17905	6.93642	4.36015	7.60643	2.37749	2.73761	3.99562	1.47838	1.1465	3.54049	1.81061	4.02668	1	1	1	0	0	1	0	1
2600	150.057	1.37685	Positive	C5H11NO2S	L-METHIONINE	21.4952	21.291	20.783	19.6058	21.6752	21.6237	16.2016	13.3658	24.5521	24.4575	23.5985	23.621	23.3715	23.5495	21.8009	11.4317	-3.0569	-3.16657	-2.81546	-4.01518	-1.69632	-1.92577	-5.59931	1.9341	2.11928	2.23101	1.87957	3.14422	0.907733	1.08568	4.9788	1.09237	1	1	0	1	0	0	1	0
2607	308.019	1.87199	Positive	NA	Unknown	19.3301	18.7727	20.9684	20.8223	20.7879	22.7534	17.6313	3.55271e-14	7.15768	-2.22045e-15	3.63123	13.0138	11.5558	3.46668	3.57033	4.26326e-14	12.1724	18.7727	17.3371	7.80847	9.23208	19.2868	14.061	-7.10543e-15	3.06858	5.55431	5.00578	1.61046	2.05581	5.75033	3.7632	0	1	1	1	0	1	1	1	0
2609	182.901	0.585938	Positive	NA	Unknown	15.4423	14.1404	15.0742	14.7182	15.5047	14.201	15.6417	15.7424	15.8201	16.0667	15.0641	15.7633	14.5944	15.476	15.39	15.8191	-0.377786	-1.92633	0.0100284	-1.04503	0.910308	-1.27497	0.251655	-0.0766558	0.278938	2.58728	0.00588969	1.06687	0.878458	1.41909	0.172469	0.0470472	0	1	0	0	0	0	0	0
2621	162.075	0.742064	Positive	C6H11NO4	L-2-Aminoadipic Acid	25.3721	25.4345	25.3	25.3844	24.8416	24.1229	24.618	20.9526	24.7501	24.822	24.8268	25.3181	25.0103	24.0481	23.0777	20.8409	0.622007	0.612506	0.473291	0.0663346	-0.168673	0.0748102	1.54037	0.11175	0.974879	0.953984	0.668161	0.0653507	0.1838	0.0743376	3.6024	0.115227	0	0	0	0	0	0	1	0
2622	120.065	0.719312	Positive	C4H9NO3	THREONINE/HOMOSERINE	26.6228	26.9407	26.1408	27.1292	27.5873	26.2431	24.5788	20.2296	27.0727	26.7928	26.7167	28.638	28.1625	26.6095	25.4628	21.2007	-0.449806	0.147857	-0.575836	-1.50887	-0.575252	-0.366353	-0.884034	-0.971133	0.440732	0.117287	0.609721	2.39509	0.608892	0.339827	1.10353	1.26235	0	0	0	1	0	0	0	0
2625	188.07	7.66668	Positive	C11H10NO2	Tryptophan-NH3	22.6273	22.9566	22.7981	22.71	23.0647	22.8935	21.9458	20.1307	24.7943	25.3264	24.8554	24.5932	23.1891	23.0025	23.3027	20.1306	-2.16693	-2.36979	-2.05733	-1.88324	-0.124363	-0.108938	-1.35694	0.00015018	5.62535	6.29953	5.25917	4.67723	0.128208	0.11063	2.96072	0.000136579	1	1	1	1	0	0	1	0
2626	139.002	1.88335	Positive	NA	Unknown	22.9266	22.5356	23.4269	23.434	23.2905	24.005	21.9211	17.7537	20.1996	19.8839	20.1129	21.8367	22.0243	20.7505	20.0962	20.6441	2.72697	2.65176	3.31397	1.59729	1.26617	3.25444	1.82498	-2.89039	5.49285	5.29676	7.00613	2.61813	1.86685	6.85475	3.17108	5.91789	1	1	1	1	0	1	1	1
2627	90.0551	0.685136	Positive	C3H7NO2	ALANINE/SARCOSINE	24.2029	24.1441	22.8792	23.4622	24.1245	23.7783	22.2971	22.4544	25.6166	24.9796	24.182	25.0654	25.0549	24.4085	23.3134	21.0534	-1.41372	-0.835563	-1.30284	-1.60319	-0.930428	-0.630263	-1.01627	1.40108	2.90497	1.35312	2.58189	3.47535	1.58127	0.905867	1.79811	2.86767	1	0	1	1	0	0	0	1
2632	188.1	3.35911	Positive	NA	Unknown	21.1127	20.3152	20.3784	20.4296	21.2636	21.7475	21.0185	19.9659	22.9313	22.4228	21.698	21.7127	21.2498	21.9201	22.0622	21.6117	-1.81861	-2.10764	-1.31966	-1.28302	0.0137645	-0.172562	-1.0437	-1.64582	3.6898	4.52132	2.33009	2.23649	0.011043	0.158939	1.65515	3.2043	1	1	1	1	0	0	0	1
2633	134.044	0.706804	Positive	C4H7NO4	ASPARTATE	24.6216	23.7736	23.6088	23.9042	24.8877	26.2028	25.7419	19.8828	24.5929	23.6003	23.8127	24.4914	24.838	23.3529	23.1899	20.0789	0.0286174	0.173336	-0.203953	-0.587171	0.0497405	2.84987	2.552	-0.1961	0.0211117	0.143387	0.172668	0.643058	0.0373319	5.92956	5.14168	0.165042	0	0	0	0	0	1	1	0
2638	148.06	0.730534	Positive	C5H9NO4	N-METHYL-D-ASPARTIC ACID	27.8041	27.2254	27.3915	27.4885	27.9315	28.4073	24.1551	19.7103	27.5378	26.9833	27.026	27.9007	27.5553	25.1766	23.2056	20.8994	0.266342	0.242042	0.36558	-0.4122	0.376159	3.23069	0.949438	-1.18905	0.230425	0.205784	0.338787	0.393997	0.351073	6.75494	1.22144	1.69161	0	0	0	0	0	1	0	0
2644	145.512	1.88521	Positive	NA	Unknown	24.3769	23.9796	24.702	24.4121	24.2194	24.7638	23.4439	19.8208	22.2023	21.7729	22.1022	22.6526	22.9145	21.8058	21.6663	19.3021	2.17463	2.20672	2.59975	1.75943	1.30493	2.95804	1.77765	0.518725	6.99897	7.12278	8.6009	5.36767	3.57695	9.8779	5.44004	0.946827	1	1	1	1	1	1	1	0
2646	216.018	1.89409	Positive	NA	Unknown	21.4017	20.9956	22.1293	21.9814	21.8316	22.9156	20.2998	14.7614	18.283	18.0133	18.2395	19.0277	19.6295	17.8863	17.6965	14.1637	3.1187	2.98226	3.88977	2.95367	2.20206	5.02936	2.60329	0.597612	4.81888	4.53774	6.40511	4.47893	2.96928	8.65486	3.76417	0.473088	1	1	1	1	1	1	1	0
2647	141.158	2.45983	Positive	NA	Unknown	21.3565	20.5482	20.6205	20.5648	21.7948	22.221	21.623	20.4109	23.2045	23.0984	22.6251	22.6517	22.251	22.7017	22.5786	22.0424	-1.84796	-2.55017	-2.00462	-2.08688	-0.456185	-0.480713	-0.955613	-1.63149	5.16029	7.69271	5.73457	6.03491	0.710115	0.76292	2.03709	4.36742	1	1	1	1	0	0	0	1
2653	154.517	1.8959	Positive	NA	Unknown	22.6401	22.2779	23.0416	22.8132	22.706	23.5767	21.7526	16.6801	20.2004	19.6344	19.1439	20.3989	20.9156	19.5843	19.5475	15.8718	2.4397	2.64354	3.89769	2.41433	1.79048	3.99246	2.2051	0.808355	3.30718	3.7034	6.20948	3.25843	2.11551	6.39777	2.86199	0.681813	1	1	1	1	1	1	1	0
2656	91.1133	2.49477	Positive	NA	Unknown	21.0174	20.2629	20.2313	20.2419	21.5548	22.027	21.3591	20.0593	22.9705	22.7966	22.3899	22.3942	21.971	22.5773	22.2578	21.7493	-1.95304	-2.5337	-2.15861	-2.15228	-0.416203	-0.550321	-0.898672	-1.69001	5.74365	7.87983	6.51208	6.48858	0.650659	0.956478	1.93814	4.75248	1	1	1	1	0	0	0	1
2663	133.097	0.653721	Positive	C5H12N2O2	ORNITHINE	16.1361	16.1613	16.8016	16.3326	14.5281	17.6314	18.2885	20.5439	18.9228	15.5793	15.9463	16.2111	15.8302	16.3157	16.8986	21.9172	-2.78667	0.581994	0.855257	0.121562	-1.3021	1.31563	1.38988	-1.37323	2.08444	0.251493	0.404862	0.0443318	0.704658	0.714658	0.77052	0.757855	1	0	0	0	0	0	0	0
2664	120.08	6.27406	Positive	C8H10N	Phenylalanine-HCOOH	22.3657	22.8209	26.8456	23.6746	24.6189	25.3788	23.2151	19.906	25.7543	30.9986	30.1545	26.115	25.411	25.2704	24.8356	20.8238	-3.38857	-8.17767	-3.30884	-2.44042	-0.792052	0.108421	-1.6205	-0.917752	9.39499	19.7878	9.15875	6.44033	1.33223	0.108654	3.74619	1.64934	1	1	1	1	0	0	1	0
2687	130.021	1.87893	Positive	NA	Unknown	21.1064	20.7582	21.5838	21.4963	21.3747	22.1776	20.0045	14.6208	18.3798	17.5652	17.237	18.9839	19.1673	18.148	16.6108	15.4492	2.72653	3.19293	4.34682	2.51247	2.20735	4.02959	3.39371	-0.828423	2.77268	3.47422	5.29115	2.46319	2.03991	4.78681	3.78472	0.515237	1	1	1	1	1	1	1	0
2712	207.11	7.68175	Positive	NA	Unknown	15.0753	7.69358	15.9245	13.6959	16.537	17.6747	17.6363	17.3327	19.7513	19.5448	18.5406	17.6171	17.9198	18.9674	19.0929	18.6047	-4.676	-11.8512	-2.61609	-3.92123	-1.38285	-1.29268	-1.45657	-1.27207	2.02075	7.19385	0.877233	1.56351	0.375972	0.34545	0.40156	0.338592	1	1	0	0	0	0	0	0
2716	438.978	1.8915	Positive	NA	Unknown	19.2104	18.9268	20.0529	20.0341	19.9516	21.3295	18.0162	-3.9968e-15	12.6855	-3.10862e-15	7.53936	14.3467	16.0464	12.664	8.05865	4.13003e-14	6.52485	18.9268	12.5135	5.68741	3.90511	8.66544	9.95755	-4.52971e-14	2.42487	9.62782	5.95729	1.98506	1.15143	3.64071	4.4119	0	1	1	1	1	0	1	1	0
2721	293.064	2.24654	Positive	NA	Unknown	11.2027	10.7769	11.0087	11.639	12.2369	11.9497	11.6172	12.1414	1.77636e-15	3.59378	11.0428	7.45986	7.77718	10.5291	6.97273	10.8827	11.2027	7.18315	-0.0341047	4.17909	4.45969	1.42062	4.64443	1.25875	3.70868	1.95595	0.00442496	0.898031	0.983836	0.223698	1.04194	0.194025	1	0	0	0	0	0	0	0
2723	194.002	0.686964	Positive	NA	Unknown	9.09535	-3.55271e-15	-3.55271e-15	7.50931	12.0424	11.1794	10.5264	4.52231	15.9714	13.9964	13.3169	13.7516	12.6229	8.1724	12.7989	1.11022e-15	-6.87607	-13.9964	-13.3169	-6.24233	-0.580518	3.00699	-2.27252	4.52231	1.47919	4.11255	3.83867	1.28633	0.0695038	0.471586	0.330438	0.815508	0	1	1	0	0	0	0	0
2733	126.554	10.8721	Positive	NA	Unknown	22.126	21.8363	22.22	22.1323	22.021	21.7531	21.0948	21.9689	22.1942	22.1454	21.8362	22.2627	22.1748	22.0865	22.2626	22.392	-0.068284	-0.309093	0.383799	-0.13034	-0.153849	-0.333454	-1.16783	-0.42313	0.149408	1.00927	1.3755	0.321137	0.395359	1.12404	6.51724	1.58445	0	0	0	0	0	0	1	0
2734	85.0101	2.08741	Positive	NA	Unknown	14.3601	15.7375	15.9741	15.8914	14.899	16.6006	14.5204	3.58607	14.5887	14.9732	15.8918	15.989	13.0756	13.6552	11.6718	10.4854	-0.228649	0.764268	0.0822841	-0.0975277	1.82341	2.94536	2.84862	-6.89934	0.0469709	0.175774	0.0163664	0.0194642	0.51124	0.982492	0.937397	3.35641	0	0	0	0	0	0	0	1
2735	176.027	1.9005	Positive	NA	Unknown	20.2514	19.8049	20.7885	20.6423	20.5159	21.418	18.9114	12.4548	16.969	15.4312	15.5726	17.701	18.568	16.0689	16.1413	7.66536	3.28236	4.37374	5.21583	2.94136	1.94788	5.34914	2.77005	4.78942	1.37771	2.0919	2.70194	1.17666	0.662373	2.80216	1.08015	2.38768	0	1	1	0	0	1	0	1
2738	220.115	8.11084	Positive	NA	Unknown	18.2559	17.3341	18.3889	18.3321	18.4249	18.4083	18.2467	18.7341	20.6607	20.3892	20.8877	20.8331	19.609	20.2782	21.299	22.5321	-2.40488	-3.05517	-2.49883	-2.50098	-1.18408	-1.86992	-3.05228	-3.79795	3.18949	4.4529	3.368	3.37211	1.14321	2.21755	4.4472	5.9269	1	1	1	1	0	1	1	1
2739	180.07	7.90479	Positive	NA	Unknown	15.2101	14.0849	17.5625	18.6279	18.4685	17.5578	20.2671	21.0068	20.6247	20.8276	20.5706	20.7422	20.7163	20.8494	21.1109	20.9935	-5.41467	-6.74273	-3.00804	-2.1143	-2.2478	-3.29154	-0.843753	0.0132162	7.23415	9.26657	3.33573	2.00401	2.1912	3.78648	0.549795	0.00593363	1	1	1	1	1	1	0	0
2742	276.985	1.89486	Positive	NA	Unknown	22.3961	22.0042	22.6505	22.4174	22.2945	22.8137	21.633	17.8907	20.3104	19.6123	20.0186	20.5799	21.0228	19.7916	19.8265	17.2464	2.08563	2.39194	2.63188	1.83752	1.27177	3.02211	1.80644	0.644389	6.63365	7.80671	8.69492	5.65971	3.4376	10.0735	5.53677	1.2848	1	1	1	1	1	1	1	0
2749	265	0.866245	Positive	NA	Unknown	8.39578	3.98798	12.5229	12.2846	12.3163	13.4318	14.7434	16.7997	0	0	4.2362	12.8477	8.28782	13.2186	15.3092	15.9127	8.39578	3.98798	8.28673	-0.563106	4.02849	0.213168	-0.565794	0.887008	2.01835	0.699237	1.98021	0.0682706	0.708935	0.0247264	0.0686196	0.111918	1	0	1	0	0	0	0	0
2762	180.902	0.668892	Positive	NA	Unknown	3.86377	3.9968e-15	2.22045e-15	12.9588	14.4151	15.1156	14.1223	13.3236	0	5.32907e-15	3.55271e-15	1.77636e-15	12.6212	8.55522	8.08162	12.4899	3.86377	-1.77636e-15	-1.77636e-15	12.9588	1.79388	6.56035	6.04066	0.833622	0.845977	0	0	4.75472	0.309586	1.80494	1.60051	0.12622	0	0	0	1	0	0	0	0
2778	217.019	1.87336	Positive	NA	Unknown	19.1651	18.7074	19.9009	19.7209	19.5779	20.6739	17.8944	7.92757	13.4121	12.9294	12.5411	14.5912	16.9099	13.8896	13.6033	6.74256	5.75299	5.778	7.35971	5.12977	2.66804	6.78435	4.29119	1.18501	2.17906	2.19288	3.11162	1.84345	0.727072	2.76834	1.42203	0.256573	1	1	1	0	0	1	0	0
2780	119.524	2.14986	Positive	NA	Unknown	10.628	10.5274	7.14602	11.0336	11.2185	11.6879	12.5724	11.5022	3.49523	11.148	11.3571	12.71	11.8631	12.1956	11.1366	10.8352	7.1328	-0.620592	-4.21108	-1.67646	-0.644656	-0.507789	1.43576	0.667007	3.33193	0.132712	1.55245	0.436049	0.138522	0.106147	0.358122	0.143965	1	0	0	0	0	0	0	0
2783	212.064	1.88236	Positive	NA	Unknown	19.9771	19.5137	20.4263	20.364	20.2269	21.0399	18.9961	11.5429	16.2083	15.5854	14.662	17.9775	17.9977	15.8477	16.3733	12.057	3.7688	3.92837	5.76424	2.38647	2.22925	5.19216	2.62286	-0.514075	4.53926	4.7995	7.75249	2.37866	2.15393	6.85076	2.72765	0.291435	1	1	1	1	1	1	1	0
2787	152.005	2.24494	Positive	NA	Unknown	13.3481	11.8572	12.702	13.4612	13.1297	12.2731	11.1385	15.335	12.9713	12.6376	12.9422	12.9431	13.2037	12.1127	7.14921	16.8529	0.376818	-0.780388	-0.240209	0.518057	-0.0739838	0.160365	3.98927	-1.51785	0.101861	0.233828	0.0626035	0.145303	0.0184228	0.0408957	2.0984	0.538182	0	0	0	0	0	0	1	0
2791	292.067	7.66108	Positive	NA	Unknown	5.07972	-3.55271e-15	1.77636e-15	3.55271e-15	4.77383	0	15.467	16.7683	17.4907	17.5756	16.7057	15.6731	16.6631	18.3634	18.7086	18.2997	-12.411	-17.5756	-16.7057	-15.6731	-11.8892	-18.3634	-3.24161	-1.53142	4.4676	6.9824	6.56489	6.06438	4.2134	7.3566	0.66214	0.254407	1	1	1	1	1	1	0	0
2793	145.096	0.738934	Positive	NA	Unknown	22.3516	22.3793	22.1024	22.054	21.3091	19.9207	20.3249	17.83	21.2702	22.126	22.4372	21.9989	20.7642	19.2746	18.1081	18.4823	1.08131	0.253295	-0.334889	0.055058	0.544928	0.64609	2.2168	-0.65226	0.750094	0.125538	0.172359	0.0247968	0.307644	0.380463	2.09269	0.385065	0	0	0	0	0	0	1	0
2798	136.507	1.89205	Positive	NA	Unknown	21.9597	21.5445	22.3232	22.0176	21.7533	22.2479	20.924	17.0546	19.7295	19.3876	19.8774	20.345	20.503	19.214	19.0741	15.7566	2.23018	2.15691	2.44571	1.67263	1.25037	3.03386	1.84989	1.29797	5.24462	5.01904	5.9068	3.54381	2.33347	7.67519	4.07806	2.4637	1	1	1	1	1	1	1	1
2802	287.978	1.89008	Positive	NA	Unknown	21.3024	21.0704	21.5796	21.5068	21.3832	22.0527	20.5366	15.4476	19.0289	18.0055	17.9629	19.3678	19.8534	18.6853	18.1612	15.1904	2.2735	3.06491	3.61668	2.13903	1.52981	3.36741	2.37542	0.257168	2.54941	3.9011	4.88716	2.33334	1.43219	4.43966	2.71645	0.144603	1	1	1	1	0	1	1	0
2804	157.02	1.89155	Positive	NA	Unknown	21.8292	21.4786	22.0992	21.889	21.6712	22.1631	20.8586	16.6739	19.6709	19.2313	19.981	20.109	20.2435	18.9955	18.8167	15.9983	2.1583	2.24728	2.11814	1.78001	1.42776	3.16763	2.04187	0.675574	4.94965	5.22053	4.82742	3.8067	2.78283	7.96336	4.59566	0.944399	1	1	1	1	1	1	1	0
2813	507.263	10.8752	Positive	NA	Unknown	17.3022	17.0034	17.9803	18.3516	17.3833	16.0691	17.66	19.2435	19.2824	19.0882	18.746	19.4847	18.6096	18.8646	19.6809	19.4038	-1.98024	-2.08483	-0.765747	-1.13312	-1.22626	-2.79552	-2.02091	-0.160292	3.48634	3.74765	0.887979	1.55417	1.74352	5.56414	3.58761	0.126863	1	1	0	0	0	1	1	0
2814	224.076	1.9723	Positive	NA	Unknown	15.6793	16.6768	16.2288	17.8878	16.3658	19.0863	13.9225	12.054	13.8845	14.4176	15.4922	18.5001	16.9811	15.5235	13.5019	15.631	1.79483	2.25922	0.736558	-0.612375	-0.615245	3.56278	0.42064	-3.57695	0.759094	1.04682	0.242307	0.194801	0.195868	2.02196	0.126833	2.03371	0	0	0	0	0	1	0	1
2817	242.981	1.8831	Positive	NA	Unknown	20.0336	20.1827	20.0533	20.1962	19.8965	20.9866	19.3358	13.5305	16.7146	14.8625	16.0445	17.6325	18.04	17.4866	14.9318	13.5031	3.31902	5.32023	4.00876	2.56377	1.85657	3.50003	4.40393	0.0274275	3.71411	6.89829	4.80983	2.56897	1.60547	3.99894	5.44362	0.0121286	1	1	1	1	0	1	1	0
2826	122.51	1.89038	Positive	NA	Unknown	21.4526	20.989	21.7891	21.4889	21.372	21.9063	20.5248	15.3931	19.1716	18.6251	18.2254	19.6914	20.0286	18.8108	18.7219	15.3593	2.28102	2.36396	3.56366	1.79756	1.3434	3.09547	1.80297	0.0338233	3.60847	3.79347	6.52015	2.5668	1.6794	5.4571	2.578	0.0215411	1	1	1	1	0	1	1	0
2829	269.043	2.18703	Positive	NA	Unknown	11.3479	11.4362	7.46596	3.49452	10.4516	10.5096	10.1965	10.2154	3.68041	0	0	7.06572	3.48305	10.4133	10.4528	10.7538	7.66751	11.4362	7.46596	-3.5712	6.96852	0.0963057	-0.256309	-0.538367	1.94877	3.47087	1.87448	0.658982	1.69522	0.0117735	0.0320287	0.0698809	0	1	0	0	0	0	0	0
2833	276.117	10.8722	Positive	NA	Unknown	19.6217	19.3879	19.9088	19.9541	19.6021	18.947	18.9402	20.2644	20.3985	20.3283	20.0418	20.485	20.1185	20.1134	20.5208	20.439	-0.776728	-0.940429	-0.133021	-0.530934	-0.516432	-1.16638	-1.58063	-0.174523	2.74825	3.60988	0.249044	1.57985	1.51756	4.84986	7.12623	0.347295	0	0	0	0	0	1	1	0
2841	248.99	1.89431	Positive	NA	Unknown	21.2962	20.8982	21.5664	21.3224	21.2045	21.7522	20.5035	16.0861	19.0812	18.4568	18.3506	19.4903	19.8419	18.603	18.4118	15.8072	2.21501	2.44142	3.21578	1.83213	1.36264	3.14925	2.09176	0.278907	4.57143	5.20381	7.33939	3.51704	2.29814	7.1597	4.2289	0.266098	1	1	1	1	1	1	1	0
2842	216.981	2.25895	Positive	NA	Unknown	18.044	16.7977	19.2413	19.2346	19.0243	18.251	18.3036	18.7319	19.3552	19.6035	17.7295	19.5555	19.4653	18.8926	17.2661	18.4971	-1.3112	-2.80582	1.51182	-0.320927	-0.441054	-0.641561	1.03747	0.234826	1.66963	4.92608	2.05487	0.253463	0.374964	0.610508	1.19016	0.175427	0	1	1	0	0	0	0	0
2845	271.055	1.07058	Positive	NA	Unknown	19.0246	17.8782	15.81	15.9873	15.1519	15.1107	17.7589	14.3638	17.3607	16.7426	15.9252	16.5829	15.5895	14.3975	14.5744	11.6371	1.66394	1.13562	-0.115161	-0.595682	-0.437545	0.7132	3.18451	2.72661	0.972013	0.575737	0.0413198	0.254554	0.176936	0.317057	2.48327	1.98075	0	0	0	0	0	0	1	1
2848	189.018	1.79509	Positive	NA	Unknown	3.64989	2.22045e-15	3.63595	7.79243	13.6845	14.1405	11.5849	10.6732	0	1.77636e-15	3.75743	7.83586	7.20395	3.43192	7.74416	13.7739	3.64989	4.44089e-16	-0.121482	-0.0434312	6.48052	10.7086	3.84076	-3.10062	0.471053	0	0.0112737	0.00399758	1.02773	2.12393	0.503428	0.382196	0	0	0	0	0	1	0	0
2854	102.055	0.707702	Positive	C4H7NO2	1-AMINOCYCLOPROPANE-1-CARBOXYLATE	24.2922	24.1894	23.4934	24.452	25.4059	24.6068	22.1449	20.1829	24.527	24.2193	24.416	25.9464	25.6548	24.3285	23.2523	21.5495	-0.234734	-0.02985	-0.922565	-1.49439	-0.248928	0.278313	-1.10735	-1.36659	0.257581	0.0270396	1.60904	3.23839	0.27655	0.317077	2.09971	2.84932	0	0	0	1	0	0	1	1
2857	190.083	7.69378	Positive	NA	Unknown	13.5385	11.1879	12.3946	13.5764	14.1439	15.3034	14.6913	14.4258	17.6153	17.8656	16.8428	15.8942	15.7409	17.2727	17.3009	16.7229	-4.07678	-6.67765	-4.44818	-2.31788	-1.597	-1.9693	-2.60967	-2.29715	2.98534	5.85395	3.38047	1.31508	0.777191	1.04173	1.56131	1.29817	1	1	1	0	0	0	0	0
2883	352.152	10.8707	Positive	NA	Unknown	20.2389	20.0334	20.3454	20.3623	20.2449	19.8087	18.9182	20.1937	20.3066	20.3166	20.0904	20.4226	20.3805	20.3171	20.4511	20.5393	-0.067655	-0.283213	0.255036	-0.0603127	-0.1356	-0.508409	-1.53294	-0.345574	0.224225	1.48998	1.28063	0.195865	0.534472	3.47546	12.7633	1.99086	0	0	0	0	0	0	1	0
2893	134.093	7.64276	Positive	NA	Unknown	9.60377	11.5637	12.6743	12.0307	13.1914	14.9601	13.8001	13.3176	17.5397	17.0391	17.0248	15.3047	14.7462	16.5226	16.2838	16.0858	-7.9359	-5.4754	-4.35052	-3.27401	-1.55486	-1.56249	-2.4837	-2.7682	3.51005	2.0557	1.47068	0.979002	0.362566	0.364804	0.668134	0.774826	1	1	0	0	0	0	0	0
2896	73.0287	6.84429	Positive	NA	Unknown	14.3747	13.5104	14.4036	13.7461	12.256	11.7898	13.4886	10.3455	14.5164	15.8333	14.8482	14.6684	12.9541	12.7854	12.2548	12.3668	-0.141709	-2.32287	-0.444546	-0.922363	-0.698043	-0.99566	1.23372	-2.02126	0.0643951	2.13981	0.231465	0.57975	0.403265	0.642326	0.861775	1.7469	0	1	0	0	0	0	0	0
2899	219.965	1.87568	Positive	NA	Unknown	18.5511	19.0669	19.134	18.6137	18.8126	20.0424	17.2774	11.8205	15.271	13.7419	14.1906	14.4607	15.8825	16.1205	13.7851	12.646	3.28011	5.32504	4.94348	4.15291	2.93011	3.92188	3.49233	-0.825499	2.33849	4.63764	4.19175	3.28528	1.98383	3.02764	2.5614	0.348172	1	1	1	1	1	1	1	0
2902	291.95	1.90289	Positive	NA	Unknown	18.4206	18.8692	18.4278	19.0381	18.6876	19.9584	17.7997	11.4236	14.6919	13.3319	13.8669	15.6852	15.8087	15.7963	13.1912	6.57321	3.72867	5.53726	4.56095	3.35287	2.87889	4.16213	4.60849	4.85039	1.67478	2.97506	2.24672	1.43532	1.15269	1.96608	2.28091	2.45708	0	1	1	0	0	0	1	1
2912	131.515	1.90609	Positive	NA	Unknown	19.4065	19.029	19.676	19.5221	19.4418	20.2586	18.2755	13.6333	15.2297	14.3812	13.7839	15.5965	17.4589	15.0234	14.0056	13.5402	4.17678	4.64783	5.89203	3.92557	1.98292	5.23527	4.26988	0.0931023	7.6971	8.68565	11.1117	7.15593	2.87395	9.86541	7.89529	0.0605068	1	1	1	1	1	1	1	0
2919	217.048	7.95318	Positive	NA	Unknown	12.9819	11.79	12.8617	14.8355	14.5432	14.9989	12.7449	14.483	17.2591	14.8867	14.5015	14.9048	15.2311	17.0117	13.3818	14.5783	-4.27725	-3.09675	-1.63979	-0.0693052	-0.687912	-2.01282	-0.636938	-0.0953353	4.83544	3.08916	1.22867	0.0293832	0.379216	1.65277	0.344261	0.0409088	1	1	0	0	0	0	0	0
2927	311.126	10.8714	Positive	NA	Unknown	20.0421	19.8619	20.1529	20.1941	20.0456	19.5248	18.5479	19.8957	20.1299	20.067	19.7403	20.2628	20.148	20.1427	20.2205	20.2893	-0.0878497	-0.205067	0.412597	-0.0687087	-0.102357	-0.617967	-1.67253	-0.393608	0.2454	0.726138	1.96704	0.183676	0.295322	3.52301	11.6541	1.83638	0	0	0	0	0	0	1	0
2933	140.151	2.46455	Positive	NA	Unknown	16.4229	15.1472	15.0032	15.1074	17.8161	17.9215	17.55	15.8984	19.3239	18.9716	17.1575	18.797	18.2267	18.8633	18.5999	18.1001	-2.90106	-3.82444	-2.15436	-3.68958	-0.410592	-0.941789	-1.04986	-2.20175	2.91498	4.29875	1.89201	4.09211	0.208449	0.588933	0.681689	1.95304	1	1	0	1	0	0	0	0
2934	119.071	7.67023	Positive	NA	Unknown	12.8844	4.03229	11.8794	7.42335	12.8429	15.0476	12.8073	13.7513	16.8158	17.0238	16.0639	15.0054	14.4928	16.1029	16.4428	15.6385	-3.93139	-12.9915	-4.18447	-7.58207	-1.64991	-1.05531	-3.63554	-1.88719	1.07966	5.84955	1.18013	2.79571	0.338666	0.19756	0.96654	0.401101	0	1	0	1	0	0	0	0
2937	292.957	1.88873	Positive	NA	Unknown	19.9211	19.6527	20.1582	20.1198	20.2615	20.738	19.102	13.0606	16.8201	15.3149	15.0767	17.4301	18.3757	17.1583	16.6679	15.8314	3.10106	4.33779	5.08152	2.68978	1.88582	3.5797	2.43414	-2.77077	2.88281	4.61036	5.67781	2.34618	1.39917	3.53682	2.02841	2.44957	1	1	1	1	0	1	1	1
2940	164.561	7.69168	Positive	NA	Unknown	4.36746	0	-3.55271e-15	1.77636e-15	4.06246	11.5791	16.6752	12.6535	15.4487	15.789	13.8744	13.6007	13.1284	15.703	15.8595	15.6727	-11.0813	-15.789	-13.8744	-13.6007	-9.06594	-4.12393	0.815641	-3.01923	4.63651	7.26798	6.20974	6.05651	3.51473	1.12592	0.143822	0.728035	1	1	1	1	1	0	0	0
2953	193.142	7.61516	Positive	NA	Unknown	29.6642	31.4394	29.0192	30.5326	30.2354	29.4711	29.3197	20.9377	26.9255	27.9047	27.0184	29.33	28.0879	28.2625	27.7903	20.5286	2.73871	3.53475	2.00088	1.20255	2.14749	1.20859	1.52942	0.40914	2.37275	3.42424	1.50196	0.730882	1.66454	0.735906	1.0215	0.18801	1	1	0	0	0	0	0	0
2964	131.022	1.89305	Positive	NA	Unknown	16.9859	16.5409	18.2947	17.7568	17.9373	19.1917	16.6798	12.5398	13.871	12.8497	13.9689	15.2569	15.2464	13.9741	13.9446	12.0564	3.1149	3.69116	4.32583	2.49996	2.69086	5.21759	2.7352	0.483446	3.8904	4.90168	6.02115	2.84861	3.16549	7.56082	3.24006	0.297441	1	1	1	1	1	1	1	0
2965	129.007	8.51705	Positive	NA	Unknown	18.3467	18.1175	18.8254	18.7	18.6253	18.4528	19.2356	19.5432	19.3406	19.3281	19.145	19.4585	19.2797	19.4668	19.7206	19.7085	-0.993932	-1.21059	-0.319571	-0.758543	-0.654461	-1.01398	-0.485022	-0.165371	3.06759	4.04914	0.60973	2.07385	1.67227	3.15639	1.08571	0.263737	0	1	0	0	0	1	0	0
2966	189.122	1.88626	Positive	NA	Unknown	16.4132	19.4444	16.981	18.5794	18.969	18.1058	15.9619	17.4113	19.808	19.1503	17.4892	20.7805	20.1605	20.2302	18.464	13.1642	-3.39476	0.294114	-0.508222	-2.2011	-1.19147	-2.12443	-2.50205	4.24708	2.30257	0.099352	0.184007	1.22712	0.526242	1.16637	1.47635	3.18142	1	0	0	0	0	0	0	1
2970	215.577	10.8726	Positive	NA	Unknown	18.5241	18.2867	18.3339	18.7044	18.3905	18.5137	17.5519	18.283	18.5824	18.5639	17.9648	18.7881	18.1205	18.7222	18.5824	18.8576	-0.0583263	-0.277159	0.369072	-0.0836496	0.270055	-0.208497	-1.03045	-0.574562	0.0696254	0.422826	0.615557	0.102971	0.409021	0.295994	2.6532	1.13715	0	0	0	0	0	0	1	0
2981	228.908	0.632918	Positive	NA	Unknown	17.6077	18.4989	18.1089	17.5011	17.7244	17.3061	18.4789	18.335	16.9681	17.884	15.9798	16.6547	17.3412	17.2217	17.9706	18.8175	0.639565	0.614927	2.12905	0.846338	0.383259	0.084443	0.508331	-0.48252	0.713087	0.67597	3.97438	1.05333	0.364474	0.0645289	0.524137	0.48954	0	0	1	0	0	0	0	0
2983	141.036	0.881025	Positive	NA	Unknown	13.4503	13.1847	13.597	13.7083	14.6943	14.085	14.1974	14.1339	3.9233	-3.55271e-15	8.60861	4.2662	14.3499	13.2753	14.044	11.3099	9.527	13.1847	4.98837	9.44205	0.344424	0.809726	0.153354	2.82401	3.01882	4.74498	1.18149	2.9803	0.0475972	0.119647	0.0206013	0.539143	1	1	0	1	0	0	0	0
2985	87.0077	1.86755	Positive	NA	Unknown	18.3531	18.9205	19.4742	19.5138	19.1067	19.8014	16.6247	13.7104	15.2888	17.4129	16.2213	17.0296	17.2018	16.8773	16.0901	14.4878	3.06429	1.50764	3.25289	2.4842	1.90491	2.92405	0.534586	-0.777367	3.55414	1.27417	3.864	2.63283	1.78865	3.32645	0.317224	0.510958	1	0	1	1	0	1	0	0
2987	163.095	7.55546	Positive	NA	Unknown	16.6492	16.3243	16.6644	15.6824	15.3156	14.9638	15.7267	14.5358	18.4091	17.5435	17.6906	17.5696	16.2427	15.0108	16.6536	15.1174	-1.75993	-1.21922	-1.02621	-1.88718	-0.927126	-0.0469243	-0.926846	-0.581549	2.97909	1.74788	1.36099	3.29131	1.17615	0.0343078	1.17565	0.615415	1	0	0	1	0	0	0	0
2989	127.526	8.51779	Positive	NA	Unknown	18.2418	17.9669	18.7444	18.6157	18.5208	18.3405	19.1371	19.3468	19.1211	19.1533	18.9715	19.2961	19.2005	19.3261	19.5914	19.5338	-0.879228	-1.18637	-0.227114	-0.680395	-0.679713	-0.98566	-0.45426	-0.186981	2.64002	4.03871	0.399791	1.81766	1.815	3.1117	1.01544	0.313353	0	1	0	0	0	0	0	0
2999	264.963	1.89691	Positive	NA	Unknown	19.5891	19.2723	19.836	19.8263	19.6957	20.363	18.7327	12.7191	15.7493	14.5932	15.309	15.9238	17.8615	16.5622	16.2955	8.7774	3.83981	4.67903	4.52701	3.90251	1.83419	3.80083	2.43722	3.94168	1.49417	1.99261	1.89885	1.52971	0.534194	1.47223	0.783915	1.55206	0	1	0	0	0	0	0	0
3002	318.048	8.51368	Positive	NA	Unknown	17.054	17.3624	18.2399	18.1359	18.0059	17.3162	18.7559	19.1657	18.9209	18.7891	18.7377	18.9295	18.9439	19.1253	19.3366	19.3861	-1.86687	-1.42666	-0.497883	-0.793649	-0.938054	-1.80909	-0.580755	-0.220399	4.77649	3.29307	0.728797	1.40727	1.79427	4.57891	0.901833	0.256078	1	1	0	0	0	1	0	0
3003	214.001	1.83614	Positive	NA	Unknown	20.4393	20.5645	20.228	20.6632	21.039	20.5529	18.198	19.0057	19.3742	19.5403	19.6037	20.5516	20.5821	20.2022	19.7285	20.1721	1.06512	1.02416	0.624331	0.111625	0.456948	0.350742	-1.53049	-1.16641	2.45509	2.31902	1.13138	0.12885	0.731117	0.512832	4.11057	2.80004	1	1	0	0	0	0	1	1
3008	177.027	1.96337	Positive	NA	Unknown	15.7239	15.237	16.9235	16.9173	16.812	17.1022	14.9276	10.4334	3.54197	0	0	12.7949	10.3936	15.9509	12.7918	6.91267	12.1819	15.237	16.9235	4.12236	6.41839	1.1513	2.13577	3.52072	4.15805	5.60302	6.39714	0.879379	1.65661	0.174659	0.367393	0.707372	1	1	1	0	0	0	0	0
3030	148.549	10.8728	Positive	NA	Unknown	19.2038	19.0197	19.2768	19.2293	19.0977	18.7442	17.415	19.0319	19.322	19.1896	18.9148	19.3097	19.1806	19.1701	19.2372	19.4206	-0.118246	-0.1699	0.361962	-0.0803422	-0.0829163	-0.425998	-1.8222	-0.388693	0.373603	0.598229	1.73498	0.232703	0.241629	2.20027	13.1351	1.92497	0	0	0	0	0	0	1	0
3042	144.168	2.46541	Positive	NA	Unknown	14.0842	13.528	13.3176	14.1581	15.6082	17.276	16.7959	14.0581	17.2513	17.5718	15.0652	17.2004	17.2946	17.8082	17.4147	16.671	-3.16712	-4.04377	-1.74765	-3.04232	-1.68639	-0.532177	-0.618741	-2.61293	2.22611	3.1686	0.944255	2.09939	0.89819	0.204936	0.245045	1.68162	1	1	0	1	0	0	0	0
3056	213.017	8.49643	Positive	NA	Unknown	18.1433	17.9145	18.4921	18.4721	18.4829	18.0778	18.856	19.1235	18.954	18.9875	18.8077	19.077	19.0116	19.1753	19.3389	19.3181	-0.810731	-1.073	-0.31563	-0.604873	-0.528685	-1.09752	-0.48285	-0.194606	2.72591	4.05445	0.70672	1.7799	1.46342	4.18254	1.28376	0.374673	0	1	0	0	0	1	0	0
3060	217.095	7.37459	Positive	NA	Unknown	8.76259	14.6389	13.0068	12.6783	12.2963	3.52113	3.60568	11.7375	9.35521	11.6593	12.9769	13.6465	12.664	14.2183	11.8559	6.96089	-0.592619	2.97958	0.0299342	-0.968226	-0.367661	-10.6972	-8.25027	4.77661	0.0659643	0.426068	0.00311942	0.112463	0.0398717	2.54406	1.7426	0.799	0	0	0	0	0	1	0	0
3061	118.032	0.95933	Positive	C4H7NOS	L-HOMOCYSTEINE THIOLACTONE	12.7651	3.89631	12.7652	13.3414	10.7538	14.4852	13.0298	13.3798	14.4686	16.1668	12.9875	10.0883	14.242	13.8597	15.6017	12.2363	-1.70349	-12.2705	-0.222309	3.25316	-3.4882	0.625484	-2.57186	1.14352	0.291487	4.433	0.0308489	0.670459	0.737318	0.0921665	0.490466	0.181421	0	1	0	0	0	0	0	0
3065	289.98	1.89615	Positive	NA	Unknown	15.3058	16.0144	16.1649	16.0997	16.8304	18.3048	15.7505	3.44223	11.7484	3.59521	7.55763	11.2704	12.9257	12.3893	11.2498	-2.70339e-14	3.55738	12.4192	8.60723	4.8293	3.90478	5.9155	4.50063	3.44223	0.83653	4.96191	2.98363	1.28949	0.952853	1.7304	1.16547	0.799261	0	1	1	0	0	0	0	0
3066	256.057	6.26527	Positive	NA	Unknown	8.98075	5.32907e-15	3.80893	11.8517	12.2428	13.7009	13.8118	11.1124	16.0962	5.32907e-15	3.55271e-15	14.2591	13.6544	15.9272	15.345	15.2701	-7.11548	0	3.80893	-2.40744	-1.41158	-2.22627	-1.53315	-4.15771	2.33033	0	0.945648	0.506954	0.259211	0.457847	0.286542	1.07026	1	0	0	0	0	0	0	0
3071	208.995	2.11867	Positive	NA	Unknown	13.7897	13.9474	13.204	12.8921	13.1485	13.0468	3.54339	6.53316	7.43993	11.6889	11.273	11.7056	12.7841	12.8576	11.1414	-7.10543e-14	6.34975	2.25848	1.93099	1.18652	0.364455	0.189134	-7.59802	6.53316	2.15542	0.504583	0.412039	0.226321	0.0606671	0.0305327	2.79678	2.24675	1	0	0	0	0	0	1	1
3074	168.561	7.90189	Positive	NA	Unknown	5.3029	0	13.5908	15.3178	14.7556	14.0405	17.232	18.2753	17.4964	18.0606	17.7402	17.8291	17.995	18.0808	18.3935	18.2524	-12.1935	-18.0606	-4.14938	-2.51133	-3.23938	-4.04028	-1.16147	0.0229092	6.28939	9.85472	1.38763	0.684875	0.974247	1.33526	0.255527	0.00406211	1	1	0	0	0	0	0	0
3083	143.01	1.90513	Positive	NA	Unknown	17.7027	16.3831	18.489	17.607	17.4227	19.041	17.0397	14.2978	12.5869	11.8325	8.55197	13.7814	15.6807	12.7943	13.2545	10.1964	5.11578	4.55057	9.93707	3.8256	1.74198	6.24668	3.78521	4.10141	2.36417	1.99332	5.92206	1.54799	0.517925	3.15373	1.52432	1.71299	1	1	1	0	0	1	0	0
3089	277.127	7.38947	Positive	NA	Unknown	13.4668	14.0429	13.1595	11.208	7.9807	11.3339	11.2336	10.3461	13.5221	12.918	12.4743	7.57892	11.1612	11.5097	12.9855	3.37202	-0.0553624	1.12487	0.685248	3.62911	-3.18049	-0.175802	-1.7519	6.97413	0.00780783	0.186734	0.106599	0.8243	0.687717	0.025274	0.317429	2.10408	0	0	0	0	0	0	0	1
3090	278.059	8.51752	Positive	NA	Unknown	9.66537	12.4869	16.1574	16.2628	14.9813	13.4012	17.6532	18.7967	18.1208	18.3701	18.1652	18.3749	18.3191	18.5581	19.0294	18.9977	-8.45542	-5.88323	-2.00777	-2.1121	-3.3378	-5.15685	-1.37622	-0.20096	3.9435	2.34954	0.516536	0.552229	1.03467	1.9389	0.319194	0.0374191	1	1	0	0	0	0	0	0
3097	74.0239	0.694747	Positive	NA	Unknown	19.9097	18.5063	18.3023	18.9131	20.3049	21.0397	20.13	12.0566	21.4783	19.275	19.7905	20.2241	19.8575	18.6651	18.3559	12.7476	-1.56858	-0.768675	-1.48816	-1.31095	0.447374	2.37458	1.77409	-0.691071	1.32693	0.495995	1.23018	1.02676	0.251792	2.42541	1.58595	0.432101	0	0	0	0	0	1	0	0
3101	140.126	2.50368	Positive	NA	Unknown	13.5641	13.3283	13.1133	12.9035	15.5734	16.9226	16.4943	13.4126	17.5324	17.0112	14.5434	16.9026	16.6762	17.1596	17.4411	16.932	-3.96831	-3.68285	-1.43013	-3.99902	-1.10281	-0.236951	-0.946844	-3.51939	3.209	2.88372	0.742872	3.2444	0.523906	0.085074	0.429716	2.70101	1	1	0	1	0	0	0	1
3109	280.024	0.913852	Positive	NA	Unknown	8.88572	9.42791	13.7292	15.5482	15.8844	16.8386	13.7774	-5.77316e-15	3.55271e-15	13.0654	14.26	16.2897	16.4671	15.4526	4.94173	-1.90958e-14	8.88572	-3.63745	-0.530827	-0.741518	-0.582706	1.38609	8.83567	1.33227e-14	2.319	0.650343	0.0667913	0.0958653	0.0738131	0.194127	2.30001	0	1	0	0	0	0	0	1	0
3110	146.091	7.65743	Positive	NA	Unknown	8.51838	-3.55271e-15	3.79427	-6.21725e-15	3.91058	8.62447	3.69121	7.91223	14.2021	15.5425	14.2336	8.43956	12.4927	14.423	13.862	12.0079	-5.68375	-15.5425	-10.4393	-8.43956	-8.58213	-5.79852	-10.1708	-4.09567	0.824218	3.49766	1.96946	1.44521	1.48072	0.847412	1.89598	0.529172	0	1	0	0	0	0	0	0
3114	296.09	10.8775	Positive	NA	Unknown	18.7896	18.5908	18.8353	18.888	18.7412	18.7051	17.8886	18.7506	18.8305	18.7929	18.6257	18.9114	18.8292	18.866	18.9286	19.015	-0.0409952	-0.202089	0.20962	-0.0233095	-0.0879731	-0.160903	-1.04001	-0.264419	0.132527	0.980081	1.03208	0.0713582	0.325556	0.714314	9.09417	1.43975	0	0	0	0	0	0	1	0
3120	255.064	10.8733	Positive	NA	Unknown	18.7131	18.5091	18.7849	18.8375	18.7861	18.6608	17.3262	18.6342	18.7155	18.6365	18.4468	18.7864	18.7503	18.7374	18.7469	18.9	-0.00233525	-0.127391	0.338152	0.0511062	0.0357443	-0.0765678	-1.42069	-0.26581	0.00504502	0.364533	1.37125	0.124018	0.0836952	0.196777	9.41369	0.972396	0	0	0	0	0	0	1	0
3122	113.505	1.89308	Positive	NA	Unknown	18.9168	18.0224	19.5029	18.6841	18.789	19.3914	17.7252	11.1856	14.738	14.2921	13.2743	15.8216	16.5994	13.6639	14.2313	11.3872	4.17889	3.73029	6.22866	2.86251	2.18963	5.72754	3.49394	-0.201607	5.42361	4.6677	8.76038	3.23258	2.19524	7.97461	4.27117	0.102466	1	1	1	1	1	1	1	0
3126	357.131	10.8933	Positive	NA	Unknown	18.6495	18.475	18.7378	18.8773	18.7789	18.341	17.1772	18.5988	18.7307	18.6827	18.451	18.901	18.8079	18.7721	18.9084	18.9043	-0.0811228	-0.207648	0.28671	-0.0237458	-0.0290254	-0.431104	-1.73113	-0.305453	0.24056	0.805627	1.27067	0.0608628	0.0754454	2.2988	12.7529	1.39216	0	0	0	0	0	0	1	0
3128	124.507	1.89351	Positive	NA	Unknown	18.3448	18.4228	19.2426	18.9698	18.8776	19.5112	16.6568	11.1416	14.7837	13.94	12.8178	15.0154	16.1328	14.3178	15.0946	11.1037	3.5611	4.48277	6.42484	3.95446	2.74483	5.19339	1.56222	0.0378561	5.47376	7.28311	10.7746	6.2535	3.8553	8.61964	1.71182	0.020994	1	1	1	1	1	1	0	0
3130	124.999	1.89177	Positive	NA	Unknown	17.173	16.751	18.5784	17.5812	17.7311	18.8165	14.9881	10.3764	11.9687	11.1347	12.1312	13.1054	14.3512	11.0027	11.331	10.5474	5.20423	5.61633	6.44726	4.47579	3.37989	7.81381	3.65713	-0.17097	7.59762	8.29024	9.63242	6.33657	4.39326	11.6722	4.88517	0.090739	1	1	1	1	1	1	1	0
3147	146.059	7.61233	Positive	NA	Unknown	20.4613	19.4795	19.3944	19.8019	19.7453	19.9096	20.8876	25.5497	21.2208	20.72	21.5218	21.4969	20.9337	21.0873	22.1613	23.1401	-0.759508	-1.24054	-2.12742	-1.69496	-1.18841	-1.17772	-1.27375	2.40958	1.28027	2.61211	5.51342	4.06755	2.45444	2.42244	2.71382	6.45322	0	1	1	1	1	1	1	1
3155	324.959	0.742069	Positive	NA	Unknown	18.1167	18.1808	19.8019	18.284	17.6173	16.3743	18.2255	9.76996e-15	19.3745	20.0797	19.3378	19.1794	16.7459	15.6062	10.1618	-1.86517e-14	-1.25774	-1.89888	0.464083	-0.895385	0.871393	0.768068	8.06369	2.84217e-14	0.235209	0.390253	0.0764226	0.158221	0.153392	0.132973	2.93518	0	0	0	0	0	0	0	1	0
3156	139.128	2.48814	Positive	NA	Unknown	13.6631	12.6958	12.2987	11.9761	15.8253	16.5987	15.1301	13.6908	16.5398	14.9204	13.2921	16.3196	15.8691	16.7394	17.273	16.8509	-2.87668	-2.2246	-0.993406	-4.34356	-0.0438121	-0.140681	-2.14291	-3.16006	2.00745	1.3812	0.4557	3.63386	0.0146153	0.0486457	1.30861	2.30212	1	0	0	1	0	0	0	1
3163	289.048	7.61919	Positive	NA	Unknown	4.81614	0	3.55271e-15	13.9541	5.35048	9.00466	15.3428	14.7949	17.2751	18.5757	18.375	18.1382	17.1271	17.22	18.3018	14.3922	-12.459	-18.5757	-18.375	-4.18414	-11.7766	-8.21539	-2.95902	0.402761	3.58482	6.1165	6.03352	0.750737	3.31059	1.96672	0.472577	0.0480575	1	1	1	0	1	0	0	0
3167	260.052	0.762873	Positive	C6H14NO8P	D-GLUCOSAMINE 6-PHOSPHATE	17.5595	16.907	17.7416	20.2234	21.4577	21.02	18.7835	16.2433	14.4882	15.2335	16.7043	19.2589	20.3535	21.2159	20.4651	15.8924	3.07127	1.67343	1.03739	0.964544	1.10419	-0.195887	-1.68165	0.350918	3.62833	1.50836	0.765684	0.693092	0.834631	0.100515	1.51912	0.194276	1	0	0	0	0	0	0	0
3172	159.556	7.89476	Positive	NA	Unknown	5.01982	-1.42109e-14	12.2175	13.184	13.8929	12.6075	16.5929	17.4292	17.0552	16.7508	17.2021	17.0916	17.1708	17.5559	17.5499	17.5047	-12.0354	-16.7508	-4.98456	-3.90753	-3.27786	-4.94848	-0.957019	-0.0755087	6.46612	9.45098	1.90742	1.33915	1.04149	1.88731	0.211646	0.0140274	1	1	0	0	0	0	0	0
3174	222.073	2.49768	Positive	NA	Unknown	13.3695	11.5998	12.6765	13.8856	16.3594	15.1948	15.4693	13.2698	17.0889	13.9499	13.4642	15.3476	16.2524	15.5569	16.7048	16.435	-3.71942	-2.35007	-0.787717	-1.46206	0.107023	-0.362071	-1.23555	-3.16515	3.50914	1.80756	0.399967	0.914478	0.0418675	0.157108	0.724401	2.78724	1	0	0	0	0	0	0	1
3181	147.509	1.89103	Positive	NA	Unknown	17.9651	17.6717	19.0668	17.816	18.1593	19.1136	16.4692	8.12856	14.6049	13.4276	12.8609	15.0683	15.6935	14.0484	14.6633	7.73376	3.36026	4.24416	6.20583	2.74769	2.46585	5.06527	1.80593	0.394795	0.897154	1.24945	2.16978	0.679852	0.587692	1.61373	0.391845	0.0680331	0	0	1	0	0	0	0	0
3184	139.118	2.49412	Positive	NA	Unknown	13.3915	11.3474	12.9235	11.9146	14.516	16.1444	15.2882	13.2591	16.1397	14.8317	14.1477	15.8133	16.2103	16.4749	16.5273	15.8862	-2.74815	-3.48436	-1.2242	-3.89871	-1.69427	-0.330557	-1.23912	-2.6271	1.67025	2.36077	0.539027	2.77819	0.837215	0.111906	0.547728	1.56431	0	1	0	1	0	0	0	0
3194	340.03	8.53513	Positive	NA	Unknown	15.8286	13.2852	14.8597	15.6055	14.976	11.7535	16.545	17.8023	17.0654	17.1151	17.3956	16.9655	17.5361	17.8792	18.1533	18.2206	-1.2368	-3.82986	-2.53584	-1.36005	-2.56007	-6.12576	-1.60825	-0.418321	0.9843	4.93774	2.7792	1.12626	2.81757	8.75162	1.43318	0.240344	0	1	1	0	1	1	0	0
3198	197.099	7.90346	Positive	NA	Unknown	16.7414	16.518	16.6476	17.1227	17.3013	16.8704	16.9543	17.9098	17.7455	18.0206	17.7652	18.1623	17.9509	18.0363	18.0307	17.8595	-1.00412	-1.50258	-1.11762	-1.0396	-0.649607	-1.16594	-1.0764	0.0502899	5.2226	8.52177	5.99434	5.46434	2.85765	6.3207	5.7147	0.103425	1	1	1	1	0	1	1	0
3199	226.116	2.45044	Positive	NA	Unknown	12.68	11.9086	11.4618	12.069	14.4682	14.9956	14.58	12.9231	15.971	15.5526	13.6058	16.2629	15.542	15.0953	15.964	15.6722	-3.29101	-3.64403	-2.14401	-4.19389	-1.07387	-0.099709	-1.38397	-2.74903	2.72763	3.1574	1.46229	3.84956	0.557682	0.0367622	0.786042	2.10011	1	1	0	1	0	0	0	1
3202	354.095	8.51407	Positive	NA	Unknown	16.1154	16.1628	17.0324	16.6427	16.7264	15.5497	17.6093	18.1525	17.7428	17.5019	17.0457	17.8212	17.8724	18.0923	18.3426	18.3657	-1.62733	-1.33906	-0.0133679	-1.17856	-1.14608	-2.54264	-0.733248	-0.213136	2.49586	1.87872	0.00909856	1.55991	1.49788	4.6786	0.794432	0.168105	1	0	0	0	0	1	0	0
3209	294.957	1.88892	Positive	NA	Unknown	13.9335	14.3295	13.8213	14.2228	14.3613	15.6689	14.0963	1.06581e-14	3.66653	-4.44089e-15	3.72771	3.63241	7.42839	10.8031	3.7562	7.7685	10.267	14.3295	10.0936	10.5904	6.93288	4.86576	10.3401	-7.7685	2.35216	3.78996	2.29457	2.4606	1.32865	0.805137	2.37654	1.56666	1	1	1	1	0	0	1	0
3210	261.007	1.89171	Positive	NA	Unknown	17.7113	16.8357	16.9115	16.5621	17.0391	18.2675	16.2006	6.75212	13.9248	12.9726	12.6192	14.3258	14.9156	12.7861	12.8526	6.84049	3.78649	3.86302	4.29237	2.23634	2.12349	5.48141	3.348	-0.0883644	1.31216	1.35057	1.57335	0.628788	0.586646	2.24705	1.10005	0.0167531	0	0	0	0	0	1	0	0
3211	220.116	7.55171	Positive	NA	Unknown	17.8244	18.6298	18.9137	19.034	18.8766	17.9479	13.7553	14.8975	17.8562	18.0946	19.0899	19.6751	19.1124	17.3532	17.4929	19.6173	-0.0317876	0.535171	-0.176215	-0.641102	-0.235849	0.594639	-3.73765	-4.71978	0.0169027	0.373932	0.10189	0.471176	0.140996	0.427571	5.55075	7.40391	0	0	0	0	0	0	1	1
3212	255.008	1.8956	Positive	NA	Unknown	17.1095	16.2232	17.7566	15.6929	17.2554	18.569	16.3418	6.91042	12.7028	7.78053	12.2191	14.0497	14.3227	12.1531	13.0376	3.29235	4.40665	8.44263	5.53748	1.64312	2.93265	6.41587	3.30421	3.61807	1.20796	3.10038	1.68091	0.322413	0.683588	2.08351	0.805019	0.913386	0	1	0	0	0	1	0	0
3228	250.037	6.25744	Positive	NA	Unknown	16.8379	17.1458	21.2989	18.2227	19.3831	20.0692	17.6323	12.7148	20.385	23.1249	23.6736	20.5931	20.1638	19.9495	19.6281	14.5356	-3.54702	-5.97908	-2.37468	-2.37043	-0.780756	0.119665	-1.99576	-1.82077	6.57907	11.6212	3.88178	3.87213	0.788551	0.0819503	3.03654	2.66076	1	1	1	1	0	0	1	1
3232	251.053	7.85147	Positive	NA	Unknown	15.4794	18.1222	17.768	18.993	18.5917	17.4607	16.3818	16.6518	14.3305	16.8388	17.3329	17.7305	17.4927	15.8678	13.3057	12.4821	1.1488	1.2834	0.435063	1.26247	1.09907	1.59296	3.07609	4.16967	0.558961	0.648295	0.169059	0.634084	0.527207	0.872105	2.24802	3.48238	0	0	0	0	0	0	1	1
3234	359.074	8.49884	Positive	NA	Unknown	18.2498	18.3703	18.5643	17.6163	18.0458	17.0927	18.1689	18.1841	18.5348	17.3653	17.3067	17.7385	17.9406	17.9433	18.1541	18.213	-0.284925	1.00502	1.25757	-0.122197	0.105197	-0.850594	0.0147627	-0.0288489	0.297234	1.63174	2.26251	0.111257	0.0943526	1.28158	0.0121956	0.0241457	0	0	1	0	0	0	0	0
3246	121.095	1.11753	Positive	NA	Unknown	7.94563	12.3589	2.66454e-15	4.02285	8.53508	12.3707	11.1773	6.69691	14.3942	12.53	12.7242	12.6507	12.9118	13.709	13.1788	14.0053	-6.44855	-0.171082	-12.7242	-8.62786	-4.37674	-1.33825	-2.00148	-7.30838	1.52703	0.0212548	4.06096	2.3339	0.87836	0.193838	0.314131	1.83223	0	0	1	1	0	0	0	0
3259	198.112	6.59026	Positive	NA	Unknown	18.0504	19.9372	19.5682	20.5399	20.8607	19.6756	19.0317	16.9854	14.9415	19.2122	19.881	20.9775	21.1742	19.6269	18.5349	17.728	3.10887	0.724988	-0.312831	-0.437663	-0.313441	0.0487269	0.496788	-0.742589	2.27118	0.308959	0.115992	0.169526	0.116244	0.0164019	0.196361	0.318242	1	0	0	0	0	0	0	0
3261	131.049	6.25854	Positive	NA	Unknown	16.912	17.4673	21.7202	18.4377	19.466	20.2206	17.7833	11.9071	20.5818	25.9565	25.0445	20.9573	20.2647	20.1154	19.6446	14.6235	-3.66978	-8.48922	-3.3243	-2.51958	-0.798765	0.105229	-1.86135	-2.71637	6.71322	15.5194	5.93719	4.11245	0.794335	0.0700202	2.67825	4.55681	1	1	1	1	0	0	1	1
3273	115.994	1.89402	Positive	NA	Unknown	14.4935	14.104	15.3121	15.4476	15.4518	16.5053	14.3269	3.40542	11.2812	11.3455	12.1278	12.3945	12.2955	11.1412	11.0439	3.02848e-14	3.21226	2.75853	3.18424	3.05311	3.15631	5.36405	3.28297	3.40542	1.52004	1.22008	1.50084	1.41213	1.48178	3.19838	1.56888	1.65471	0	0	0	0	0	1	0	0
3289	155.053	10.8786	Positive	NA	Unknown	16.8125	16.7862	17.4162	17.3425	16.411	16.6161	15.0532	17.0165	17.3516	17.5085	16.4504	17.6105	17.3898	17.2995	17.1421	17.7263	-0.539113	-0.722316	0.965884	-0.267999	-0.978822	-0.683479	-2.08888	-0.709763	0.455943	0.671702	1.00453	0.193494	1.02361	0.623419	3.06339	0.655947	0	0	0	0	0	0	1	0
3295	285.983	1.89294	Positive	NA	Unknown	14.6513	14.0784	14.9133	14.8986	15.3219	16.1061	13.9642	3.30846e-14	11.4175	3.61097	7.28534	11.0246	12.2556	10.6877	7.90223	2.44249e-15	3.23376	10.4675	7.62799	3.87394	3.06631	5.41837	6.06196	3.06422e-14	0.748289	4.01415	2.56001	0.961863	0.695847	1.55564	1.83184	0	0	1	1	0	0	0	0	0
3308	265.104	9.46662	Positive	NA	Unknown	16.3556	15.9028	15.6465	17.289	18.6275	16.578	15.4507	15.0417	15.1755	15.8581	15.9766	17.1944	15.3023	15.5378	14.2506	14.6528	1.18016	0.0447354	-0.330091	0.0946159	3.32524	1.04014	1.2001	0.38887	0.506756	0.0136143	0.110465	0.0292878	2.17261	0.430181	0.518021	0.132616	0	0	0	0	1	0	0	0
3318	198.111	6.70928	Positive	NA	Unknown	18.3979	20.3848	19.6152	20.8846	21.7147	20.4188	20.1445	16.9907	14.3595	17.936	18.662	20.5104	21.4079	19.4797	18.0734	17.3755	4.03835	2.44887	0.953186	0.374236	0.306792	0.939013	2.07109	-0.384752	4.47375	2.1988	0.578749	0.181656	0.144666	0.567329	1.7221	0.187597	1	1	0	0	0	0	0	0
3406	175.023	1.89967	Positive		Citrate source fragment (+NH3)	24.3605	23.9919	24.8601	24.75	24.6301	25.4323	23.4133	19.3588	21.8159	21.3191	21.5506	22.6172	22.783	21.3719	21.1564	18.8623	2.54459	2.67276	3.3095	2.13278	1.84704	4.06042	2.2569	0.49649	7.26266	7.69332	9.73664	5.84596	4.84652	11.9227	6.27728	0.747783	1	1	1	1	1	1	1	0
3422	138.054	0.895658	Positive	C7H7NO2	Trigonelline	25.153	25.1719	24.2449	23.4453	25.236	27.356	27.4468	26.0512	27.7638	27.8305	27.3016	26.7701	26.8145	27.6193	27.7393	25.6423	-2.6108	-2.65852	-3.05672	-3.32479	-1.5785	-0.26333	-0.292501	0.408917	7.4154	7.57437	8.8675	9.70158	3.86923	0.323551	0.368924	0.56913	1	1	1	1	1	0	0	0
3434	169.068	0.730763	Positive	NA	Unknown	23.2479	23.4709	23.1278	22.7106	20.9571	21.1025	21.2354	15.0536	23.2351	23.1701	23.3062	22.6701	21.6337	20.2893	18.7942	12.4162	0.0128118	0.300778	-0.178336	0.0405286	-0.676617	0.813167	2.44121	2.63738	0.00635535	0.174257	0.0968996	0.0204202	0.468855	0.597334	2.85222	3.18624	0	0	0	0	0	0	1	1
3443	83.0376	0.588651	Positive	NA	Unknown	20.7691	20.0308	21.053	20.4199	22.0596	23.0519	22.7046	19.8519	20.3562	21.2653	21.8941	21.1866	22.1843	21.1365	21.9486	20.6945	0.412928	-1.23455	-0.841095	-0.766661	-0.124703	1.91537	0.756042	-0.842625	0.295963	1.27787	0.744598	0.656333	0.0755838	2.41976	0.644086	0.746456	0	0	0	0	0	1	0	0
3456	501.246	10.8727	Positive	NA	Unknown	17.3483	16.9707	17.2397	17.5928	17.21	16.9761	15.2965	17.0276	17.5531	17.444	17.0165	17.5723	17.5203	17.5718	17.6297	17.8103	-0.20483	-0.473226	0.223196	0.0205782	-0.31031	-0.595694	-2.33316	-0.782713	0.447624	1.4163	0.500462	0.0335099	0.779192	1.97967	11.3243	2.94232	0	0	0	0	0	0	1	0
3462	224.11	7.67	Positive	NA	Unknown	4.07667	4.08156	3.87645	-3.60822e-15	-3.10862e-15	4.42246	4.25806	3.72118	14.7911	14.4628	13.2249	9.47193	12.2984	14.3609	13.7171	13.6656	-10.7145	-10.3813	-9.34847	-9.47193	-12.2984	-9.93849	-9.45902	-9.94438	1.93853	1.85122	1.58914	1.61975	2.37	1.73722	1.61654	1.73872	0	0	0	0	1	0	0	0
3465	220.974	2.23972	Positive	NA	Unknown	16.4741	17.4742	16.6119	15.4304	14.2614	11.7727	11.9019	13.1872	12.163	12.163	13.0374	12.766	12.2561	13.3624	14.1371	14.216	4.31111	5.31121	3.57447	2.66438	2.00537	-1.58968	-2.23514	-1.02879	6.74332	8.59406	5.32383	3.57039	2.37499	1.69274	2.77917	0.907353	1	1	1	1	1	0	1	0
3469	254.135	10.8783	Positive	NA	Unknown	17.3869	17.4406	17.6158	17.1802	17.6747	18.0446	15.9242	16.9339	17.4548	17.6466	17.3295	17.52	17.4845	17.2221	17.5279	17.9127	-0.0679404	-0.205999	0.286344	-0.339741	0.190193	0.82246	-1.60368	-0.978759	0.0744976	0.261573	0.393192	0.48999	0.237666	1.67712	4.36456	2.1615	0	0	0	0	0	0	1	0
3471	212.11	6.59989	Positive	NA	Unknown	7.2499	10.8131	11.165	13.1485	14.4005	16.1769	16.5819	15.668	14.4691	14.282	14.0277	14.3179	14.757	13.2856	14.9866	13.7635	-7.21922	-3.46895	-2.86273	-1.16942	-0.356521	2.89132	1.59535	1.90458	4.35809	1.52314	1.15483	0.347326	0.0878318	1.17135	0.517102	0.654815	1	0	0	0	0	0	0	0
3477	326.089	7.35771	Positive	NA	Unknown	12.574	12.5216	12.1196	11.4545	7.00895	3.27528	10.5477	10.3642	12.0458	11.4048	10.8468	11.2241	10.627	11.2416	10.636	10.3824	0.528193	1.1168	1.27276	0.230382	-3.61808	-7.96631	-0.0883169	-0.0182301	0.112238	0.266403	0.312536	0.0460036	1.26667	3.95173	0.0171058	0.00347754	0	0	0	0	0	1	0	0
3481	146.117	2.37802	Positive	NA	Unknown	19.9264	20.5136	19.916	20.4985	20.0961	20.0001	20.3398	19.7657	20.2213	22.6288	22.1659	22.0157	20.3944	20.0047	19.0344	20.0048	-0.294904	-2.11517	-2.24992	-1.51717	-0.298256	-0.00463519	1.30543	-0.239157	0.195529	2.7535	3.0093	1.69783	0.19813	0.00257857	1.36508	0.153547	0	1	1	0	0	0	0	0
3484	290.981	1.89461	Positive	NA	Unknown	15.276	14.5321	16.4729	16.2867	16.9823	17.2222	16.0306	10.4375	12.1006	7.29935	13.9717	12.7976	14.2296	12.6586	12.8549	3.93251	3.17545	7.23278	2.50123	3.48914	2.75264	4.5636	3.17577	6.50496	0.755996	2.45974	0.547947	0.861208	0.622591	1.25959	0.756101	2.10782	0	1	0	0	0	0	0	1
3486	135.026	1.48097	Positive	NA	Unknown	21.1185	20.1977	20.5381	19.7975	19.778	19.2562	16.0757	16.8521	18.6456	19.5777	17.9796	19.0402	19.2662	16.1767	16.2239	16.1399	2.4729	0.620053	2.55844	0.757304	0.51183	3.07951	-0.148225	0.712138	2.45779	0.361755	2.58207	0.466952	0.285295	3.36874	0.0699623	0.431321	1	0	1	0	0	1	0	0
3499	272.052	3.36041	Positive	NA	Unknown	7.42066	3.38405	3.48848	6.82588	11.0411	12.717	11.5913	10.0375	13.9515	12.7726	10.7921	11.2173	8.80963	12.4646	13.7495	12.9801	-6.53085	-9.38858	-7.30363	-4.39137	2.23147	0.25246	-2.15823	-2.94261	1.41233	2.39559	1.66128	0.804516	0.330991	0.0296094	0.317583	0.470322	0	1	0	0	0	0	0	0
3504	158.996	1.84124	Positive	NA	Unknown	19.726	19.6805	20.1577	18.1362	18.9508	17.908	17.622	15.474	16.4163	18.0954	18.4492	19.1602	18.5915	17.8317	17.3016	16.1821	3.30968	1.58516	1.70852	-1.02403	0.359319	0.0763759	0.320365	-0.708147	3.74083	1.29191	1.43955	0.699615	0.187755	0.0348887	0.164447	0.429514	1	0	0	0	0	0	0	0
3505	94.0453	0.591568	Positive	NA	Unknown	20.8238	20.0057	21.0797	20.6149	22.0771	22.8345	22.6876	20.269	20.5203	21.521	21.8859	21.7615	22.2123	21.1169	21.9906	21.0307	0.303515	-1.51535	-0.806203	-1.14665	-0.135278	1.71762	0.697069	-0.761713	0.261232	2.31966	0.933381	1.54516	0.103252	2.78161	0.762595	0.86217	0	1	0	0	0	1	0	0
3506	203.052	1.56226	Positive	NA	Unknown	30.1822	27.0504	29.0027	28.4397	26.0575	24.4847	26.2365	20.2034	29.9575	30.0391	30.5638	28.3003	27.315	24.2252	21.857	21.2159	0.22466	-2.9887	-1.5611	0.139382	-1.25743	0.259463	4.37956	-1.01242	0.0745149	1.92501	0.761715	0.0449052	0.568547	0.0870727	3.34509	0.428385	0	0	0	0	0	0	1	0
3507	173.102	6.26647	Positive	NA	Unknown	12.6076	11.321	10.3957	11.181	13.1468	14.1218	13.4514	10.7067	16.1887	-5.32907e-15	10.5408	13.8985	14.0647	14.833	14.643	14.0536	-3.58113	11.321	-0.145147	-2.71748	-0.917876	-0.711166	-1.1916	-3.34686	3.82627	14.1191	0.0641398	2.58213	0.555192	0.398637	0.79032	3.47992	1	1	0	1	0	0	0	1
3508	145.006	0.713838	Positive	NA	Unknown	20.5168	20.5516	20.6078	19.8651	19.9912	18.2856	19.3322	13.6419	18.741	20.4076	21.3581	19.7797	18.1376	17.483	15.7372	12.9602	1.77576	0.14395	-0.750327	0.0853381	1.85366	0.80259	3.59502	0.681697	0.806409	0.0423824	0.264563	0.0246627	0.855903	0.287117	2.21827	0.235777	0	0	0	0	0	0	1	0
3509	287.013	0.6883	Positive	NA	Unknown	17.0039	15.6726	14.8245	16.3893	16.1378	17.4342	18.9005	15.5068	18.3737	18.2835	17.4962	16.5973	17.0806	17.7539	16.6528	15.0632	-1.36983	-2.61084	-2.67168	-0.208031	-0.942736	-0.319646	2.24769	0.443598	0.8556	2.16193	2.23574	0.086489	0.516062	0.139113	1.73768	0.202788	0	1	1	0	0	0	0	0
3514	228.989	8.51708	Positive	NA	Unknown	15.9286	15.6281	16.4813	16.4406	16.4364	15.6813	16.9893	16.9195	16.8404	16.7669	16.6644	16.7986	16.4203	16.9849	17.0803	17.3734	-0.911791	-1.13875	-0.183117	-0.357975	0.016042	-1.30366	-0.0910714	-0.453857	1.23413	1.70257	0.157422	0.350245	0.0120405	2.07383	0.0727539	0.474021	0	0	0	0	0	1	0	0
3530	134.54	10.8732	Positive	NA	Unknown	16.9682	16.3619	16.9803	17.1264	17.1715	17.0405	15.3295	16.3843	15.9312	16.7903	16.8291	17.3459	16.8963	16.6149	17.0781	17.7393	1.03701	-0.42836	0.151218	-0.219573	0.275185	0.42566	-1.74861	-1.35498	1.05142	0.324443	0.0970974	0.147128	0.190725	0.321912	2.2394	1.54425	0	0	0	0	0	0	1	0
3537	168.122	4.19264	Positive	NA	Unknown	21.5921	22.588	21.7619	21.6439	21.3951	21.0562	21.0006	22.0696	21.2094	22.7873	22.2217	21.8171	21.5277	21.2255	21.0437	24.2186	0.382746	-0.199264	-0.459719	-0.173221	-0.132655	-0.169259	-0.0431012	-2.14896	0.514831	0.22801	0.657234	0.193346	0.142315	0.188204	0.0422013	5.77008	0	0	0	0	0	0	0	1
3544	379.113	10.873	Positive	NA	Unknown	17.2182	16.1033	16.7028	17.2526	17.0057	16.731	14.7704	16.9216	17.6803	16.4618	17.22	17.0273	17.3502	17.4928	17.5643	17.8594	-0.462098	-0.358433	-0.517255	0.225259	-0.344498	-0.761823	-2.79388	-0.937748	0.435125	0.315927	0.503685	0.181332	0.300869	0.849686	5.37237	1.13881	0	0	0	0	0	0	1	0
3559	238.966	1.09493	Positive	NA	Unknown	12.4613	12.3575	13.7044	13.1079	15.0795	0	-3.10862e-15	1.40628e-14	13.0158	13.1332	8.3486	8.96556	14.9211	8.36054	-1.18424e-15	-3.13823e-14	-0.554538	-0.775761	5.35576	4.14238	0.158394	-8.36054	-1.92439e-15	4.54451e-14	0.0761468	0.109832	1.24551	0.865697	0.0205609	2.37894	0	0	0	0	0	0	0	1	0	0
3579	191.022	1.45293	Positive	NA	Unknown	23.9462	24.7566	23.13	24.0415	24.3457	24.0013	24.3138	19.8006	22.4536	23.4371	20.8888	23.8914	22.842	23.954	23.6802	19.7598	1.49261	1.31947	2.24124	0.150119	1.50373	0.0473368	0.633607	0.0407357	1.37488	1.15164	2.48402	0.079465	1.3897	0.0236941	0.425182	0.0203156	0	0	1	0	0	0	0	0
3602	104.107	0.809213	Positive	C5H13NO	Choline	31.0042	30.9019	31.0422	30.9848	30.8426	30.9646	29.324	28.0411	32.9143	32.6387	32.9271	32.6673	31.9508	31.5877	29.6629	28.5288	-1.91016	-1.73678	-1.8849	-1.68258	-1.10825	-0.623125	-0.338908	-0.487671	5.41763	4.77888	5.32458	4.57958	2.54275	1.1036	0.480489	0.782623	1	1	1	1	1	0	0	0
3604	145.049	0.702304	Positive	NA	Unknown	31.3337	31.4283	31.5154	31.002	30.0897	29.5066	30.1617	25.6731	31.5834	31.6986	31.5671	31.0429	30.174	29.0709	28.1746	26.7716	-0.249703	-0.270268	-0.0517249	-0.0409761	-0.0842944	0.435655	1.9871	-1.09844	0.189501	0.207888	0.0342489	0.0269224	0.0571282	0.371576	3.07596	1.30141	0	0	0	0	0	0	1	0
3605	85.0286	0.73756	Positive	NA	Unknown	31.0382	31.3068	31.3277	30.8101	29.8574	29.1419	29.5869	24.7333	31.2827	31.3941	31.3859	30.9113	29.8954	28.5724	27.2253	23.9202	-0.24442	-0.0873821	-0.0582426	-0.101265	-0.0379347	0.569519	2.36159	0.813168	0.185955	0.059676	0.0389538	0.0698419	0.0250013	0.528291	3.95238	0.855954	0	0	0	0	0	0	1	0
3606	221.185	0.800704	Positive	NA	Unknown	29.0655	28.9492	28.8434	28.5075	28.6357	28.8252	28.3959	26.4006	30.5846	30.4589	30.6541	30.2244	29.7319	29.1196	28.1194	26.5856	-1.51911	-1.50971	-1.8108	-1.71687	-1.09621	-0.294389	0.27653	-0.184999	4.80659	4.76686	6.03853	5.64293	3.05495	0.478871	0.441598	0.267375	1	1	1	1	1	0	0	0
3607	325.111	0.761139	Positive	NA	Unknown	30.3726	30.6246	30.569	30.0574	28.9618	28.0596	28.6792	21.4718	30.5963	30.6685	30.5706	30.0302	29.2438	27.4366	25.0222	20.4997	-0.223694	-0.0438728	-0.00163479	0.0271305	-0.281993	0.623037	3.65697	0.972113	0.0982319	0.0177928	0.000650372	0.0109196	0.126964	0.321913	3.73598	0.569632	0	0	0	0	0	0	1	0
3609	219.025	0.686899	Positive	NA	Unknown	29.6018	29.9109	29.878	29.5804	29.1499	28.5207	27.8333	24.2935	29.1142	29.4646	29.3402	29.1634	28.8321	28.0578	26.5259	23.8944	0.487617	0.446275	0.537791	0.417003	0.317803	0.462942	1.30744	0.399066	0.58887	0.523633	0.671797	0.47915	0.339028	0.549594	2.38461	0.452594	0	0	0	0	0	0	1	0
3610	147.076	0.71645	Positive	C5H10N2O3	L-GLUTAMINE	26.9462	26.5787	25.8222	27.3486	28.7771	27.9301	26.7586	20.6374	28.4513	27.5246	27.5487	28.9859	29.1541	27.6735	27.1314	21.9393	-1.5051	-0.945979	-1.72656	-1.6373	-0.376943	0.25659	-0.372871	-1.30189	1.76291	0.90562	2.15374	1.99328	0.272612	0.173022	0.269046	1.42785	0	0	1	1	0	0	0	0
3612	163.059	0.700313	Positive	NA	Unknown	30.1378	30.3844	30.2736	29.6072	28.3149	27.7103	28.3867	24.1692	29.8706	30.7268	29.7405	29.6476	28.4092	27.1235	26.5202	25.8718	0.267168	-0.342472	0.533132	-0.0404383	-0.094231	0.586781	1.86644	-1.70255	0.159119	0.21227	0.363647	0.0212116	0.0509867	0.410608	2.04524	1.78863	0	0	0	0	0	0	1	0
3613	342.137	0.758096	Positive	NA	Unknown	28.6569	28.8574	28.7549	28.3468	27.1518	26.0067	26.8113	18.807	28.8403	28.8574	28.8322	28.4727	27.4544	25.3292	21.9581	16.8236	-0.183416	4.24719e-05	-0.0772606	-0.125872	-0.302623	0.677449	4.85315	1.98335	0.0526134	1.15155e-05	0.0214556	0.0354807	0.0899601	0.224112	3.24578	0.893983	0	0	0	0	0	0	1	0
3615	157.01	1.08393	Positive	C4H6O5	(R)-MALATE	29.0159	29.1299	29.225	28.9057	28.865	28.6225	26.6845	24.7029	27.7844	27.846	27.7524	28.253	28.4299	28.1693	26.9169	25.1024	1.23153	1.28388	1.47261	0.652711	0.435064	0.453204	-0.232387	-0.399465	4.21481	4.46109	5.35402	1.69513	0.946974	1.00308	0.408342	0.840499	1	1	1	0	0	0	0	0
3616	289.09	0.765646	Positive	NA	Unknown	28.161	28.4894	28.4559	27.6999	26.6607	25.7659	26.3117	18.9993	28.2258	28.422	28.3903	27.8075	26.9663	25.1425	22.7288	18.2318	-0.0647387	0.0674047	0.0656609	-0.107623	-0.30557	0.623432	3.58295	0.767476	0.0262483	0.0273618	0.0266332	0.0444744	0.137492	0.318438	3.58283	0.413505	0	0	0	0	0	0	1	0
3617	133.06	0.709864	Positive	C4H8N2O3	L-ASPARAGINE	27.1214	25.7112	25.561	26.002	26.1205	25.4354	24.6945	20.7423	28.6965	26.6746	27.0191	27.3603	26.2755	24.8607	25.3287	21.4894	-1.57509	-0.963365	-1.45808	-1.35839	-0.154952	0.574672	-0.634259	-0.74701	2.32486	1.13955	2.07751	1.87357	0.115151	0.558781	0.637561	0.797055	1	0	1	0	0	0	0	0
3623	307.079	7.42296	Positive	C15H14O7	Gallocatechin	30.9529	31.2319	31.5262	30.9314	30.2678	30.0375	27.6808	21.3341	27.8139	26.9281	27.2542	26.6288	26.889	23.8088	22.7529	18.525	3.13894	4.30378	4.272	4.30263	3.37881	6.22875	4.92789	2.80907	3.60061	5.51918	5.46652	5.51727	3.99012	8.60776	6.54674	3.07596	1	1	1	1	1	1	1	1
3624	346.148	7.55716	Positive	NA	Unknown	27.711	27.8801	28.0766	27.4741	26.8138	26.2282	24.6764	17.589	28.0014	27.5261	27.3607	26.8794	26.1729	24.3107	21.9013	13.7518	-0.290396	0.353951	0.715958	0.59478	0.640885	1.91757	2.77517	3.83724	0.213793	0.270877	0.668008	0.521524	0.575672	2.72739	4.58298	6.94019	0	0	0	0	0	1	1	1
3626	89.0233	1.05211	Positive	NA	Unknown	28.7865	28.996	28.9145	28.5386	28.3962	27.915	24.6512	21.6703	26.9576	27.1794	27.4214	27.9358	27.9288	27.1517	25.0279	22.2316	1.82894	1.81662	1.49313	0.602876	0.467338	0.763237	-0.376724	-0.561309	3.77845	3.74296	2.83264	0.770508	0.546379	1.07177	0.412872	0.698714	1	1	1	0	0	0	0	0
3627	210.06	1.01063	Positive	NA	Unknown	27.6744	28.0662	28.0051	27.4734	27.0352	26.3157	24.3162	14.8809	27.2466	27.0187	27.0663	26.7812	26.6615	24.9064	23.1591	15.9682	0.427777	1.04755	0.938771	0.692151	0.373729	1.40924	1.15707	-1.08724	0.429074	1.46922	1.25416	0.815454	0.361451	2.26314	1.69764	1.55068	0	0	0	0	0	1	0	0
3632	97.0285	0.770786	Positive	NA	Unknown	30.0747	30.6685	30.717	29.6584	27.8854	26.4103	28.5889	23.2438	29.4472	30.98	30.7872	28.7248	27.5461	26.0797	25.9105	24.6472	0.627463	-0.311457	-0.0702089	0.933631	0.339323	0.330649	2.67833	-1.40341	0.324002	0.14169	0.0287588	0.538622	0.156179	0.151636	2.38597	0.938841	0	0	0	0	0	0	1	0
3638	184.072	0.736729	Positive	C5H14NO4P	PHOSPHOCHOLINE	22.0798	21.7203	21.8196	23.5088	26.892	28.9759	25.554	14.387	25.1327	25.4557	25.8391	26.8828	26.9215	25.6272	22.977	16.3588	-3.05292	-3.73543	-4.01954	-3.37394	-0.029582	3.3487	2.57696	-1.97178	4.37234	5.70989	6.26388	5.00092	0.0160746	4.9514	3.45534	2.35173	1	1	1	1	0	1	1	1
3639	154.002	1.06191	Positive	NA	Unknown	27.2958	27.3875	27.541	27.345	27.5919	27.5715	26.4387	24.3764	27.1134	27.0982	24.4764	27.0385	27.3972	27.4359	26.6556	24.9512	0.182363	0.289325	3.06456	0.306435	0.194694	0.135627	-0.216867	-0.57477	0.075829	0.125791	2.76838	0.134167	0.0813791	0.0552854	0.0914954	0.279671	0	0	1	0	0	0	0	0
3641	365.103	0.797379	Positive	NA	Unknown	26.8363	26.9754	26.9753	26.902	25.9987	27.0428	25.4951	21.7551	26.615	26.6862	26.5762	26.2787	25.5538	24.8281	23.5903	21.8009	0.221275	0.289209	0.399082	0.623283	0.444905	2.21467	1.90476	-0.0457426	0.115801	0.156539	0.227728	0.3936	0.259373	2.28983	1.83794	0.0218659	0	0	0	0	0	1	0	0
3643	168.064	0.714491	Positive	NA	Unknown	27.1929	27.5932	27.5362	26.8771	25.9874	25.1056	25.6104	20.5446	27.0882	27.3811	27.2699	27.0079	25.9736	24.5237	23.3798	19.3022	0.104648	0.212077	0.266317	-0.130761	0.013809	0.581925	2.23053	1.24238	0.0794654	0.174515	0.22784	0.101293	0.00976489	0.610357	4.1197	1.77877	0	0	0	0	0	0	1	0
3646	247.079	0.770626	Positive	NA	Unknown	26.5404	26.8813	26.8701	26.1463	24.9941	24.0028	24.3968	19.6441	26.8506	27.0469	26.8886	26.3632	25.2104	23.1632	20.8892	19.3474	-0.310206	-0.165556	-0.018548	-0.216803	-0.216369	0.839662	3.50759	0.296684	0.145919	0.0730589	0.00765023	0.0978932	0.0976784	0.487441	3.6657	0.138744	0	0	0	0	0	0	1	0
3647	137.059	6.81181	Positive	NA	Unknown	23.4025	23.6133	23.0281	22.0274	22.3608	20.9556	20.3111	18.4163	26.1669	26.9927	26.4859	25.3951	24.3002	21.6015	19.9258	18.1329	-2.76435	-3.37933	-3.45785	-3.36764	-1.93939	-0.645958	0.385313	0.283409	5.45025	7.00533	7.20021	6.97622	3.36226	0.697639	0.355139	0.243795	1	1	1	1	1	0	0	0
3649	351.103	7.5592	Positive	NA	Unknown	25.6677	25.0901	26.3908	25.3305	24.5485	24.0526	22.8076	15.9729	26.7138	26.2389	26.0795	25.2544	24.5648	22.437	20.0205	13.0736	-1.04611	-1.14888	0.311314	0.0761005	-0.0163357	1.61566	2.78716	2.89934	1.03003	1.17702	0.214481	0.0454421	0.00938636	1.92897	4.20921	4.4421	0	0	0	0	0	0	1	1
3650	229.069	0.761762	Positive	NA	Unknown	26.1768	26.6022	26.5223	25.7548	24.6197	23.5997	24.0145	19.6578	26.5726	26.7848	26.6231	25.9833	24.8153	22.7925	21.1077	19.5288	-0.39578	-0.182584	-0.100771	-0.228517	-0.195573	0.807172	2.90678	0.128987	0.288353	0.117365	0.0615471	0.151056	0.126719	0.72444	4.49709	0.0801965	0	0	0	0	0	0	1	0
3655	132.101	1.10681	Positive	NA	Unknown	20.7305	20.9011	21.1275	22.6578	23.0121	22.4305	21.346	21.7286	24.8321	24.8365	25.3747	26.9395	25.921	26.1163	23.9367	22.9074	-4.10161	-3.93545	-4.24713	-4.28169	-2.9089	-3.68589	-2.59076	-1.17883	5.2228	4.94555	5.46552	5.52313	3.25944	4.52983	2.76091	0.887193	1	1	1	1	1	1	1	0
3659	79.0213	1.16346	Positive	NA	Unknown	26.2708	27.7098	27.9018	28.038	27.2533	26.6928	26.1545	19.2824	25.4137	25.345	26.0627	26.5463	25.5489	24.7678	23.7467	4.83987	0.85707	2.36489	1.83908	1.49171	1.70437	1.92503	2.40781	14.4426	0.190412	0.680617	0.487032	0.372375	0.441308	0.517038	0.697465	8.21355	0	0	0	0	0	0	0	1
3660	203.052	0.930925	Positive	NA	Unknown	28.2404	28.5367	28.6232	27.9125	27.8283	28.8435	29.7729	24.4264	27.7557	27.6798	27.4907	27.0163	28.905	28.279	27.8723	24.5683	0.484734	0.856906	1.13243	0.896149	-1.07677	0.564504	1.9006	-0.141825	0.437085	0.941326	1.40129	1.00261	1.30298	0.533025	2.97309	0.102382	0	0	0	0	0	0	1	0
3661	259.08	0.779767	Positive	NA	Unknown	25.6288	25.9298	25.9024	25.3259	24.2998	23.3797	23.9788	19.9087	25.8138	25.9478	25.8564	25.4324	24.611	22.7383	21.3304	19.4847	-0.184951	-0.0180178	0.0459439	-0.106484	-0.311288	0.641328	2.6484	0.424046	0.13668	0.0118188	0.0307626	0.0744844	0.25027	0.626775	4.68353	0.36592	0	0	0	0	0	0	1	0
3662	339.103	6.82649	Positive	NA	Unknown	22.7379	22.4962	22.3814	21.1878	21.2454	19.5054	19.0228	12.6824	25.6052	26.2682	25.7601	24.56	23.5031	20.8795	19.0949	14.372	-2.86726	-3.77198	-3.37872	-3.37228	-2.25769	-1.37413	-0.0720993	-1.68967	6.70977	9.19056	8.13883	8.12124	4.94735	2.46548	0.060834	3.31887	1	1	1	1	1	1	0	1
3663	215.015	1.02618	Positive	NA	Unknown	27.2634	27.7884	27.9101	26.8248	26.0554	24.894	22.6418	14.8616	25.5724	25.1929	25.1169	24.761	24.863	23.1687	21.6221	16.003	1.69097	2.59552	2.79319	2.06386	1.19239	1.72526	1.0197	-1.14133	2.38936	4.38569	4.8417	3.18464	1.4367	2.46008	1.14714	1.34862	1	1	1	1	0	1	0	0
3664	109.032	1.02515	Positive	NA	Unknown	25.6396	26.0063	26.1052	24.7342	23.9773	23.5892	24.1114	21.4482	26.0751	26.3915	26.1431	24.9243	24.1482	22.9271	22.5593	20.4874	-0.435479	-0.385202	-0.037925	-0.190165	-0.170955	0.662137	1.55215	0.96078	0.514656	0.438786	0.0322941	0.185409	0.163964	0.908894	3.10502	1.54751	0	0	0	0	0	0	1	0
3665	113.071	0.951344	Positive	NA	Unknown	23.4851	23.9614	24.374	23.9692	25.3255	26.2121	23.9719	21.4751	24.4555	25.5623	25.115	24.9186	25.1483	25.5402	25.0203	19.9103	-0.970446	-1.60088	-0.741047	-0.949331	0.177148	0.671842	-1.04842	1.56476	2.24181	4.5571	1.51335	2.17108	0.227288	1.31327	2.50844	4.41833	0	1	0	0	0	0	1	1
3666	221.023	0.689338	Positive	NA	Unknown	25.7049	26.0221	25.9847	25.6632	25.2199	24.5846	23.89	19.7773	25.1987	25.5685	25.4327	25.247	24.9076	24.1065	22.5775	19.8455	0.506223	0.453643	0.551925	0.416142	0.312311	0.478191	1.3125	-0.0682555	0.533015	0.461836	0.597844	0.413315	0.288787	0.494611	2.03535	0.0524195	0	0	0	0	0	0	1	0
3667	217.068	1.02391	Positive	C7H14O6	METHYL BETA-D-GALACTOSIDE	26.0806	26.2134	26.0952	25.6093	25.2123	23.6747	22.9868	21.1189	25.1316	25.0857	25.6111	26.1493	25.6108	23.2924	21.8133	20.9084	0.94905	1.12771	0.484024	-0.539972	-0.39857	0.382303	1.17349	0.210562	2.50607	3.21219	0.947816	1.10647	0.72401	0.684041	3.39892	0.315847	0	1	0	0	0	0	1	0
3669	195.064	7.68785	Positive	NA	Unknown	22.2688	22.2574	22.7492	22.8786	22.4168	21.6183	21.1027	19.607	25.405	25.7172	25.5326	24.9494	23.4527	21.5283	18.432	17.5843	-3.13619	-3.45986	-2.7834	-2.07083	-1.03599	0.0900547	2.67077	2.02267	9.84824	10.8783	8.66655	6.11222	2.35186	0.101323	8.27668	5.93356	1	1	1	1	1	0	1	1
3670	170.08	2.81484	Positive	NA	Unknown	26.4837	26.2713	26.0767	25.3118	25.8784	26.8513	26.4314	23.9564	26.9153	26.6531	26.068	25.3115	25.2809	24.4162	24.2107	20.8222	-0.431589	-0.381816	0.00869413	0.000309192	0.597491	2.43503	2.22072	3.1342	0.532923	0.454131	0.00746604	0.000263349	0.827589	6.00254	5.33331	8.12487	0	0	0	0	0	1	1	1
3675	146.117	1.19584	Positive	NA	Unknown	23.2249	23.9421	23.9524	22.1891	20.9931	22.1461	20.8481	20.6617	24.7199	26.4615	26.6991	25.1428	23.5359	22.7647	22.211	22.0419	-1.495	-2.51941	-2.74668	-2.95372	-2.54278	-0.618576	-1.36281	-1.38017	1.84362	3.90473	4.39711	4.84936	3.95508	0.534735	1.61101	1.64095	0	1	1	1	1	0	0	0
3678	113.034	2.72408	Positive	NA	Unknown	24.2291	25.9833	25.3218	24.9291	25.3947	25.4972	25.3253	23.4078	26.8342	26.139	25.6559	25.8303	25.5892	24.8869	22.8977	22.586	-2.60512	-0.155715	-0.334071	-0.901186	-0.19455	0.610333	2.42758	0.821807	3.51466	0.0913316	0.216642	0.76698	0.116702	0.455916	3.17993	0.676197	1	0	0	0	0	0	1	0
3680	160.096	1.02395	Positive	NA	Unknown	21.8746	22.5228	21.6666	23.6013	24.7134	24.145	21.9346	18.8677	22.0058	23.0655	23.7135	25.3484	25.3947	24.7068	24.4496	22.7243	-0.131234	-0.542629	-2.04694	-1.74707	-0.681332	-0.561792	-2.515	-3.85659	0.0703441	0.358793	2.24514	1.78202	0.479942	0.374811	3.0244	5.44158	0	0	1	0	0	0	1	1
3681	120.09	0.806452	Positive	NA	Unknown	23.874	23.766	23.5159	23.0543	24.1991	24.3684	24.6464	22.919	25.2564	25.2707	25.312	24.9082	25.1076	24.5575	24.2846	22.7	-1.38243	-1.50465	-1.79606	-1.8539	-0.908475	-0.189026	0.361787	0.219064	5.50039	6.1273	7.59173	7.8753	3.09438	0.349783	0.823084	0.421569	1	1	1	1	0	0	0	0
3682	132.998	0.589312	Positive	NA	Unknown	22.2821	21.8646	22.5585	22.2084	23.6597	24.6754	24.3332	21.6697	21.768	22.9144	23.4112	23.2657	23.7427	22.6689	23.4269	22.3879	0.514059	-1.04981	-0.852689	-1.05734	-0.0829719	2.0065	0.906286	-0.718193	0.471957	1.25746	0.935669	1.27044	0.0574675	3.21567	1.0196	0.73742	0	0	0	0	0	1	0	0
3684	275.006	2.25983	Positive	NA	Unknown	25.2205	25.1073	24.7957	24.4703	24.1904	23.3093	22.0118	22.5399	25.5088	25.9444	25.4641	25.3974	25.0019	23.327	20.4841	22.2429	-0.288259	-0.837067	-0.668389	-0.927117	-0.811461	-0.0176301	1.52768	0.296988	0.288448	1.1891	0.865156	1.37739	1.13745	0.0140766	2.84647	0.299179	0	0	0	0	0	0	1	0
3687	381.077	0.737513	Positive	NA	Unknown	25.8981	26.5775	26.5477	25.6883	24.3339	23.2238	21.5294	16.9493	25.2989	25.8216	25.7699	25.3556	24.3063	21.7903	18.6209	16.6056	0.599151	0.755897	0.777828	0.33263	0.0276222	1.43342	2.90849	0.34363	0.335605	0.45058	0.467574	0.166251	0.0119692	1.07468	2.99341	0.172593	0	0	0	0	0	0	1	0
3688	139.038	7.42789	Positive	C7H6O3	4-HYDROXYBENZOATE	27.5688	27.6938	28.0587	27.545	27.0317	26.8072	24.9573	20.2285	25.0234	24.3512	24.6333	24.1329	24.3602	21.6278	20.9263	16.5133	2.54547	3.34261	3.4254	3.41206	2.6715	5.17937	4.03095	3.71525	4.14584	5.94579	6.13192	6.10196	4.42896	9.85819	7.47156	6.77859	1	1	1	1	1	1	1	1
3690	160.075	6.86372	Positive	NA	Unknown	25.7359	25.047	24.9701	24.5321	23.9106	23.4827	22.5253	21.1939	26.1823	24.8639	24.688	23.64	23.0492	20.9406	20.9205	19.5387	-0.446433	0.183076	0.282049	0.892101	0.861368	2.54211	1.60471	1.65519	0.452491	0.15394	0.255277	1.16339	1.10662	5.1685	2.72689	2.8514	0	0	0	0	0	1	1	1
3693	137.045	6.12815	Positive	C5H4N4O	Allopurinol	19.4431	23.9825	21.5882	22.3834	21.9215	21.0232	20.6411	19.276	26.0231	25.1243	24.7222	24.2501	23.9407	21.6334	18.549	19.5291	-6.57996	-1.14181	-3.134	-1.86668	-2.01922	-0.610115	2.09216	-0.253116	5.08619	0.438617	1.77808	0.84712	0.945415	0.203285	0.993859	0.0759203	1	0	0	0	0	0	0	0
3695	334.148	6.80563	Positive	NA	Unknown	22.1618	22.2591	21.6281	20.5642	20.8118	19.3354	18.3792	13.4588	24.696	25.6024	25.0928	23.9166	22.6307	19.9879	17.4559	13.759	-2.53422	-3.34334	-3.46469	-3.35241	-1.81891	-0.652537	0.923279	-0.300265	4.83185	6.87725	7.17764	6.89977	3.04857	0.702903	1.14133	0.259881	1	1	1	1	1	0	0	0
3697	204.551	7.55641	Positive	NA	Unknown	23.3947	23.2987	24.0518	24.3165	23.8188	23.182	22.7611	15.3721	24.8557	24.8207	24.77	24.6074	23.985	22.5888	20.2071	3.62899	-1.46096	-1.52198	-0.718194	-0.290864	-0.166211	0.593155	2.55402	11.7431	0.527034	0.556312	0.217569	0.0787202	0.0434576	0.174018	1.13579	9.00864	0	0	0	0	0	0	0	1
3698	236.148	1.12704	Positive	NA	Unknown	21.4957	21.9086	21.9078	21.1691	22.2102	23.1681	21.7805	20.7625	24.6375	25.1473	24.9713	24.6759	24.3857	23.6687	21.8535	22.3012	-3.1418	-3.23871	-3.06351	-3.50679	-2.17552	-0.500603	-0.0730664	-1.53867	4.75094	4.94733	4.59251	5.49092	2.84345	0.368594	0.04218	1.71832	1	1	1	1	1	0	0	0
3699	109.028	0.810906	Positive	NA	Unknown	27.4623	27.7086	27.8212	26.8695	25.6003	24.648	26.2105	21.1041	26.4508	27.9296	26.8985	26.3544	25.4806	24.4636	23.0562	21.4201	1.01151	-0.221045	0.922712	0.515098	0.119641	0.184391	3.15426	-0.316005	0.893001	0.133743	0.786037	0.364521	0.0682794	0.109262	4.54203	0.201545	0	0	0	0	0	0	1	0
3700	261.035	0.711505	Positive	NA	Unknown	24.2642	23.5606	23.8759	24.1369	24.4916	25.3996	25.367	18.5117	23.7712	23.0444	23.6077	23.7745	24.4329	22.8209	21.7886	18.4072	0.492996	0.51617	0.268163	0.362405	0.0586955	2.5787	3.57849	0.104497	0.52796	0.561016	0.24581	0.355526	0.0456405	5.39849	8.05539	0.0843638	0	0	0	0	0	1	1	0
3702	383.114	0.715022	Positive	NA	Unknown	24.5845	24.3273	24.3767	24.6276	24.3235	24.1615	25.4476	18.9054	24.3664	24.2866	24.1956	24.2954	24.4029	24.1355	23.5279	17.667	0.218123	0.0406973	0.181065	0.332221	-0.0793555	0.0260702	1.91973	1.23845	0.142578	0.0238089	0.115717	0.232252	0.0475915	0.0151078	2.4876	1.31506	0	0	0	0	0	0	1	0
3703	119.083	0.768211	Positive	NA	Unknown	23.6845	23.6351	23.3417	22.9134	23.9287	24.1776	24.3541	22.5776	25.0615	25.0774	25.1086	24.7011	24.8882	24.2546	23.9842	22.4498	-1.37704	-1.4423	-1.76698	-1.78768	-0.959512	-0.0770777	0.369978	0.127797	5.42388	5.75712	7.38792	7.48965	3.3122	0.1208	0.840954	0.21561	1	1	1	1	0	0	0	0
3704	137.045	1.96676	Positive	NA	Unknown	20.9704	23.9547	22.2139	22.8066	22.8397	23.6016	24.1533	23.0243	26.3276	25.4541	23.8454	24.3141	24.1339	23.1567	23.0371	23.1853	-5.35717	-1.49935	-1.63151	-1.50746	-1.29426	0.444891	1.11624	-0.160952	5.18578	0.848536	0.954936	0.854923	0.693095	0.181864	0.568035	0.0592155	1	0	0	0	0	0	0	0
3706	135.028	1.03917	Positive	NA	Unknown	25.9313	26.0581	26.0791	25.702	25.5767	25.1193	22.133	18.8588	24.0233	24.2649	24.3957	25.0889	25.1988	24.3665	22.6144	19.8049	1.90795	1.79316	1.68338	0.613139	0.377902	0.752834	-0.481391	-0.946042	3.59141	3.28988	3.00622	0.70809	0.375173	0.94081	0.51228	1.30234	1	1	1	0	0	0	0	0
3709	212.112	1.02413	Positive	NA	Unknown	24.4376	24.3699	24.2547	24.3153	23.9895	22.0323	20.7935	19.0093	23.8873	23.9869	24.7701	25.5136	24.7704	21.9168	19.6438	17.4841	0.550306	0.383019	-0.515408	-1.19834	-0.780941	0.115478	1.14968	1.52516	0.485142	0.306599	0.445634	1.42223	0.775656	0.0778231	1.33954	2.02023	0	0	0	0	0	0	0	1
3713	104.135	0.810655	Positive	NA	Unknown	22.4694	22.2355	22.1799	21.9303	22.0566	22.0565	20.2878	18.1911	24.4429	23.9434	24.4389	24.1915	23.2842	22.6922	20.3076	18.72	-1.97353	-1.70796	-2.25906	-2.26125	-1.22751	-0.635722	-0.0198129	-0.528938	1.92899	1.56274	2.34896	2.35228	0.973235	0.402423	0.00931931	0.319495	0	0	1	1	0	0	0	0
3714	144.101	1.15214	Positive	C7H13NO2	Stachydrine	24.228	24.2342	23.9393	23.2922	23.6933	23.9051	23.7877	26.3568	26.0912	26.2841	26.1244	26.0009	25.0851	23.9681	23.6341	28.8086	-1.86322	-2.04991	-2.18515	-2.70867	-1.39183	-0.0629927	0.153605	-2.45177	2.07436	2.38394	2.61551	3.55588	1.35716	0.0338758	0.0870269	3.08695	1	1	1	1	0	0	0	1
3717	210.169	7.66737	Positive	NA	Unknown	26.8723	28.6738	26.0051	27.5442	27.2552	26.693	26.5942	16.5319	23.9685	25.2151	24.0375	26.6532	25.3837	25.4192	24.9823	17.126	2.90385	3.45872	1.96761	0.890946	1.87151	1.27376	1.61192	-0.594053	2.37635	3.05905	1.34889	0.454237	1.25504	0.730898	1.01435	0.273445	1	1	0	0	0	0	0	0
3718	221.012	1.06486	Positive	NA	Unknown	25.0677	25.21	25.3157	25.0843	25.2969	25.2641	23.776	20.7257	24.7936	24.6786	24.1746	24.642	25.0404	25.0371	23.978	21.4874	0.274075	0.531315	1.14112	0.442297	0.256501	0.227002	-0.202042	-0.761657	0.317068	0.751259	2.24323	0.58614	0.292253	0.252007	0.219324	1.2468	0	0	1	0	0	0	0	0
3719	284.097	6.25058	Positive	NA	Unknown	22.2692	23.6449	22.6646	22.9433	22.6864	22.467	22.7653	19.9719	25.4617	24.7211	24.5439	24.2713	23.7593	21.9577	19.3042	19.1786	-3.19249	-1.07615	-1.87926	-1.32797	-1.07288	0.509259	3.46106	0.793314	3.77113	0.793119	1.75696	1.06477	0.789791	0.299292	4.21714	0.525667	1	0	0	0	0	0	1	0
3722	177.101	6.92382	Positive	C10H12N2O	SEROTONIN	25.2064	24.4962	24.4341	24.0168	23.4034	22.8911	21.9806	13.1344	25.744	24.4169	24.2198	23.2498	22.7045	20.3912	20.3754	11.2901	-0.537546	0.079279	0.214369	0.76701	0.698891	2.49993	1.60523	1.84422	0.494561	0.0542576	0.161229	0.797568	0.70202	4.31862	2.30129	2.81403	0	0	0	0	0	1	1	1
3726	307.092	7.76745	Positive	NA	Unknown	24.125	24.3253	24.6229	23.0723	21.4376	19.7542	20.4144	18.0632	25.1794	25.6877	26.0075	25.1008	23.1699	21.0754	19.5633	14.2984	-1.05438	-1.36241	-1.3846	-2.02848	-1.73235	-1.32116	0.851065	3.7648	1.1289	1.63396	1.67284	2.91431	2.31917	1.56252	0.834968	6.69829	0	0	0	1	1	0	0	1
3728	220.117	1.14967	Positive	NA	Unknown	18.1049	20.1902	19.8887	21.5898	21.9138	20.3322	16.4423	16.5216	22.4019	23.163	22.3056	24.0523	24.728	24.5944	21.4743	18.5744	-4.29696	-2.97273	-2.41689	-2.46251	-2.81423	-4.26221	-5.03196	-2.05282	2.64125	1.54477	1.14627	1.17731	1.42679	2.61039	3.31273	0.909893	1	0	0	0	0	1	1	0
3732	251.088	7.30922	Positive	NA	Unknown	18.5878	19.6039	21.5527	23.9992	23.9207	21.3708	21.893	22.0282	21.4715	23.1989	23.9437	24.8259	24.6721	21.9517	21.5862	20.4346	-2.88375	-3.59498	-2.39098	-0.826693	-0.751343	-0.580861	0.306835	1.59355	10.5274	12.9703	8.64005	2.10389	1.83008	1.26004	0.522104	5.28981	1	1	1	0	0	0	0	1
3734	105.104	0.823813	Positive	NA	Unknown	22.8108	22.667	22.8535	22.8038	22.7011	22.7889	21.0834	19.7694	24.845	24.558	24.8253	24.5693	23.85	23.4712	21.5181	20.3102	-2.03411	-1.89102	-1.97182	-1.76548	-1.14896	-0.682231	-0.434702	-0.540874	5.26353	4.77933	5.05268	4.3559	2.36831	1.11244	0.596491	0.802904	1	1	1	1	1	0	0	0
3735	247.058	0.737044	Positive	NA	Unknown	23.1408	22.5735	22.2825	22.8115	22.6193	22.0189	18.58	18.3269	24.703	23.5597	23.5611	23.8552	23.5623	21.3749	18.9638	16.8113	-1.56219	-0.986219	-1.27858	-1.04372	-0.943002	0.643957	-0.383825	1.51556	2.19406	1.12647	1.63829	1.22158	1.05691	0.623678	0.320021	2.09925	1	0	0	0	0	0	0	1
3741	184.038	7.53412	Positive	NA	Unknown	22.639	22.4743	23.3189	23.6349	23.1418	22.5423	22.2011	15.2636	24.1779	24.1953	24.1145	24.0126	23.4407	22.0621	19.7513	12.9066	-1.53886	-1.72101	-0.795561	-0.377641	-0.298843	0.480241	2.44984	2.357	2.01196	2.3682	0.782955	0.297002	0.223995	0.400978	3.92087	3.71536	1	1	0	0	0	0	1	1
3745	152.055	1.04867	Positive	NA	Unknown	25.3015	25.3293	25.3426	25.0428	24.8005	24.2363	21.3702	18.6162	22.9962	23.053	23.4381	24.1171	24.2527	23.4488	21.6139	19.2903	2.30527	2.27632	1.90451	0.92567	0.547755	0.787488	-0.243747	-0.674082	5.43491	5.34634	4.21104	1.49321	0.711587	1.18278	0.252328	0.948619	1	1	1	0	0	0	0	0
3747	198.551	6.82351	Positive	NA	Unknown	20.5945	21.0582	20.7754	19.8777	20.2795	18.8788	17.9679	2.33702e-14	23.9668	24.5228	24.1624	23.3648	22.1589	19.2543	16.6277	-1.0375e-13	-3.37229	-3.46466	-3.38709	-3.48712	-1.87938	-0.375532	1.34019	1.27121e-13	6.99735	7.2268	7.03419	7.28237	3.22063	0.344386	1.9742	0	1	1	1	1	1	0	0	0
3750	107.001	0.589089	Positive	NA	Unknown	21.2478	20.8538	21.4578	21.1464	22.5989	23.6261	23.2591	20.5856	20.7312	21.8569	22.359	22.1905	22.6366	21.6477	22.3239	21.2901	0.516622	-1.00305	-0.901197	-1.0441	-0.0377391	1.97837	0.935215	-0.704443	0.496446	1.23648	1.06119	1.3099	0.0261833	3.30715	1.11862	0.752248	0	0	0	0	0	1	0	0
3752	104.084	0.816376	Positive	NA	Unknown	20.9412	21.0986	21.3487	21.1427	20.8511	21.3714	19.1665	17.0602	24.0354	22.9891	23.3164	23.4711	22.5712	21.9471	19.8666	18.3234	-3.09419	-1.89047	-1.96767	-2.32834	-1.72006	-0.575654	-0.700044	-1.26316	4.51172	2.24329	2.37785	3.03236	1.95458	0.427473	0.551642	1.24873	1	1	1	1	0	0	0	0
3760	162.075	1.68152	Positive	NA	Unknown	25.308	24.9813	24.9483	24.0037	22.9663	21.8802	22.5128	21.7096	25.2137	25.1721	25.2929	24.903	23.5108	21.6153	21.255	21.5992	0.094267	-0.190813	-0.344614	-0.899218	-0.544505	0.264814	1.25774	0.110466	0.0914003	0.202472	0.417202	1.56063	0.765661	0.299944	2.54417	0.108782	0	0	0	0	0	0	1	0
3762	522.2	0.800969	Positive	NA	Unknown	23.8427	23.769	23.6522	23.7415	23.0888	22.7094	23.3205	13.9117	23.5551	23.3165	23.9129	23.7033	23.6306	21.9133	13.9387	14.8856	0.287606	0.452537	-0.260776	0.038128	-0.54181	0.796116	9.38182	-0.973884	0.0406923	0.065642	0.0367458	0.00519163	0.0796453	0.121481	3.08539	0.152455	0	0	0	0	0	0	1	0
3763	205.541	7.07286	Positive	NA	Unknown	20.5789	19.9013	21.328	21.9628	21.6079	20.7088	20.2413	16.1853	23.167	23.7575	24.0795	24.1052	23.2043	21.8995	20.1126	14.5264	-2.58812	-3.85613	-2.75153	-2.14238	-1.59641	-1.19074	0.128664	1.6589	4.79394	7.88232	5.19889	3.70022	2.42887	1.58441	0.0955531	2.56804	1	1	1	1	1	0	0	1
3766	210.06	1.14269	Positive	NA	Unknown	26.5596	28.0628	25.7585	24.0409	23.813	23.426	20.5609	16.8787	25.2502	23.9429	24.553	23.2987	23.2134	24.9037	23.152	18.0414	1.30945	4.11993	1.20548	0.742242	0.599604	-1.47764	-2.59112	-1.16266	0.69992	3.60417	0.62579	0.334224	0.257383	0.826376	1.84583	0.596174	0	1	0	0	0	0	0	0
3768	218.548	7.67284	Positive	NA	Unknown	18.1435	17.8697	20.3135	20.8183	20.265	18.8933	19.5977	12.6368	23.5338	24.0211	23.8763	23.4165	22.1326	19.9425	16.3294	3.54582	-5.39027	-6.15144	-3.56289	-2.59822	-1.86763	-1.04922	3.26831	9.09098	3.38609	4.07314	1.86062	1.17783	0.741317	0.348317	1.64074	6.77546	1	1	0	0	0	0	0	1
3769	118.122	1.1336	Positive	NA	Unknown	22.4207	21.3936	20.7847	21.6578	22.4584	22.7357	22.0086	22.5721	24.1355	22.2783	22.6403	24.2779	23.5563	24.2625	22.0199	22.182	-1.71474	-0.884741	-1.85559	-2.62004	-1.09791	-1.52677	-0.0113241	0.390107	2.56262	0.984528	2.87211	4.65268	1.33986	2.16448	0.00743502	0.332092	1	0	1	1	0	1	0	0
3770	311.22	10.8944	Positive	NA	Unknown	13.6385	18.9164	20.5873	21.1472	23.8928	27.0545	29.0251	25.976	18.2203	23.6208	26.1354	23.4158	23.0167	23.2687	23.9133	20.5505	-4.58173	-4.7044	-5.54811	-2.26855	0.876142	3.78584	5.11179	5.4255	4.19135	4.34562	5.41374	1.52633	0.413184	3.20852	4.86058	5.25832	1	1	1	0	0	1	1	1
3771	354.174	8.75957	Positive	NA	Unknown	21.7365	23.6557	23.8196	22.9773	21.7113	21.3417	19.4582	7.28848	22.1318	23.9834	25.0515	23.9452	22.254	20.9773	20.0592	-2.66454e-15	-0.395319	-0.327751	-1.23189	-0.967864	-0.542659	0.364331	-0.600985	7.28848	0.107622	0.0876402	0.411475	0.304163	0.153517	0.0983749	0.172574	4.93044	0	0	0	0	0	0	0	1
3773	207.096	0.73817	Positive	NA	Unknown	13.2416	16.9614	10.1702	22.4355	24.5897	23.5781	21.7269	16.3013	18.9081	18.8199	21.271	24.7695	24.9078	23.8829	23.3804	19.5599	-5.66657	-1.85852	-11.1009	-2.33406	-0.318051	-0.304787	-1.65355	-3.25859	1.07014	0.248633	2.83387	0.328322	0.0356569	0.0341148	0.216339	0.502348	0	0	1	0	0	0	0	0
3774	229.153	6.67476	Positive	NA	Unknown	22.9125	23.7745	23.3663	22.1372	21.4981	21.6406	20.355	18.5441	23.0425	23.8395	24.4502	24.1024	22.5984	21.3243	19.7602	16.9948	-0.129962	-0.0649778	-1.08385	-1.9652	-1.10032	0.316294	0.594812	1.54932	0.0901494	0.043068	1.26181	2.99256	1.28947	0.248181	0.54978	2.12036	0	0	0	1	0	0	0	1
3779	141.016	2.24872	Positive	C4H6O4	SUCCINATE	24.0864	23.8998	23.6495	23.2883	23.0291	22.4359	21.617	21.9813	24.3316	24.6696	24.1595	24.0961	23.7483	22.3807	20.5634	21.7119	-0.245194	-0.769763	-0.509989	-0.807809	-0.719268	0.0552285	1.05362	0.269327	0.337087	1.59727	0.886744	1.71346	1.44747	0.0618128	2.52334	0.379215	0	0	0	0	0	0	1	0
3781	147.012	2.26105	Positive	NA	Unknown	24.4306	24.3419	24.1562	24.0067	23.7585	23.136	21.8788	22.454	24.5174	24.824	24.6401	24.4572	24.2839	23.1104	20.3324	22.107	-0.0868449	-0.48207	-0.483937	-0.450482	-0.525346	0.0256122	1.54643	0.346973	0.0829069	0.641847	0.645201	0.586078	0.721299	0.0230298	3.38474	0.416727	0	0	0	0	0	0	1	0
3785	151.096	4.1925	Positive	NA	Unknown	23.5587	24.602	23.7767	23.6392	23.3739	23.0569	22.9244	24.0088	23.1283	24.7908	24.1914	23.7962	23.4788	23.1657	22.9307	26.2078	0.430399	-0.188819	-0.414748	-0.157026	-0.104907	-0.108825	-0.00635646	-2.19902	0.546235	0.19649	0.520193	0.158778	0.101068	0.10523	0.00556493	5.4146	0	0	0	0	0	0	0	1
3786	233.062	0.920512	Positive	NA	Unknown	24.7015	25.2582	25.2708	24.7065	23.9364	23.0247	22.5589	21.448	24.4343	24.1586	24.3786	24.4672	23.8004	22.9974	22.2256	21.3807	0.267159	1.09959	0.892143	0.239335	0.136005	0.0272807	0.333312	0.0672626	0.296521	2.03759	1.50266	0.259406	0.134426	0.0243083	0.390705	0.0623113	0	1	0	0	0	0	0	0
3787	123.013	0.589235	Positive	NA	Unknown	21.0301	20.6991	21.2012	20.9035	22.3743	23.3484	22.8987	20.4002	20.5728	21.6473	22.1531	21.896	22.3434	21.507	21.9817	21.0675	0.457359	-0.948186	-0.951876	-0.992513	0.0309661	1.84144	0.917001	-0.667278	0.448557	1.2145	1.22128	1.29691	0.0223527	3.17808	1.15773	0.741539	0	0	0	0	0	1	0	0
3788	238.106	6.21699	Positive	NA	Unknown	15.2839	17.5056	21.8842	20.455	20.4818	20.1496	17.7281	14.467	16.8797	25.3104	25.664	22.642	21.9699	21.3135	20.7154	15.4574	-1.59581	-7.80486	-3.77978	-2.18703	-1.48811	-1.16388	-2.98725	-0.990459	0.518148	4.84955	1.72879	0.792332	0.472931	0.345808	1.22962	0.283381	0	1	0	0	0	0	0	0
3790	346.257	10.244	Positive	NA	Unknown	18.0109	19.467	20.2414	19.4714	20.3973	21.7912	23.4975	21.7867	24.7644	23.7553	23.2748	20.5353	19.6419	19.6423	21.0437	18.5572	-6.75356	-4.28825	-3.03346	-1.06395	0.755328	2.14893	2.45376	3.22948	9.68361	5.69831	3.57168	0.794133	0.500917	2.17525	2.63771	3.89847	1	1	1	0	0	1	1	1
3794	131.033	1.51838	Positive	C5H8O5	2-hydroxyglutarate-water	26.7709	26.5632	26.3437	25.6344	25.0216	24.5677	23.1577	21.4678	24.9466	25.0102	24.7081	25.1761	24.4153	23.0793	21.5263	21.0876	1.82424	1.55303	1.63562	0.458287	0.606379	1.48833	1.63139	0.38018	6.56493	5.355	5.72539	0.94561	1.41034	5.0644	5.70646	0.729716	1	1	1	0	0	1	1	0
3796	323.074	6.80951	Positive	NA	Unknown	25.8905	25.0886	24.9958	24.2027	22.5627	22.0191	21.3684	18.449	23.6265	24.6078	24.0985	22.4498	21.8793	20.0531	17.9682	14.0637	2.26397	0.480873	0.897237	1.75295	0.683414	1.96601	3.40016	4.38529	3.65622	0.416689	0.963734	2.53624	0.661731	2.99269	6.2818	8.48219	1	0	0	1	0	1	1	1
3799	269.086	6.11846	Positive	NA	Unknown	17.5526	22.5306	20.1007	20.9101	20.3761	19.4383	19.139	17.3874	24.6476	23.736	23.3207	22.8104	22.5368	20.0567	13.0795	18.0629	-7.095	-1.2054	-3.21997	-1.90034	-2.16069	-0.618391	6.05948	-0.67557	2.1099	0.198841	0.684964	0.344573	0.405151	0.0936501	1.67626	0.103188	1	0	0	0	0	0	0	0
3801	211.048	6.52764	Positive	NA	Unknown	24.501	24.2445	24.5981	24.3594	24.0073	23.7066	22.3184	16.9176	23.8265	23.6399	23.6918	23.4357	23.01	20.5167	19.0414	7.46508	0.674537	0.604597	0.906269	0.923709	0.997305	3.18988	3.27702	9.45251	0.204999	0.180432	0.292019	0.298919	0.32858	1.59284	1.65653	7.13465	0	0	0	0	0	0	0	1
3802	182.09	0.755471	Positive	NA	Unknown	24.0278	24.1405	24.0374	23.9278	23.0879	22.7269	23.5027	19.142	23.2833	23.1133	23.1412	23.0967	23.0384	22.4548	21.4004	17.9109	0.744482	1.02717	0.896197	0.831061	0.0494462	0.272121	2.10229	1.2311	0.871555	1.37729	1.13226	1.01717	0.0365002	0.237728	3.87043	1.79175	0	0	0	0	0	0	1	0
3804	287.111	8.85381	Positive	NA	Unknown	24.0333	23.0768	22.7664	21.7984	20.7506	20.779	18.9791	15.712	24.7305	24.0498	23.6461	22.9269	20.7181	17.7891	14.677	-2.44249e-14	-0.697196	-0.973017	-0.87967	-1.12856	0.0325539	2.98989	4.30209	15.712	0.608395	0.96199	0.835493	1.18746	0.0193725	4.7824	7.55464	22.6716	0	0	0	0	0	1	1	1
3805	131.117	1.09332	Positive	C6H14N2O	N-ACETYLPUTRESCINE	21.0651	20.932	20.7279	20.0465	19.9293	19.4762	18.1939	15.0948	24.1233	22.726	22.7902	23.1551	22.3043	20.6948	19.8778	17.6616	-3.05812	-1.79404	-2.06224	-3.10851	-2.37499	-1.21862	-1.68394	-2.5668	4.26348	1.98986	2.43766	4.35971	2.98916	1.13654	1.81425	3.33937	1	1	1	1	1	0	0	1
3811	293.209	10.2829	Positive	NA	Unknown	18.0568	19.2895	20.0074	19.1833	20.0809	21.0744	22.3562	21.3988	24.6467	23.5936	23.0207	20.1101	19.2657	19.164	20.0147	16.3147	-6.58984	-4.30405	-3.01336	-0.926859	0.815205	1.91043	2.34143	5.08416	9.87921	6.0519	3.76221	0.697882	0.587001	1.95292	2.62578	7.41332	1	1	1	0	0	0	1	1
3812	245.075	2.75401	Positive	NA	Unknown	22.4358	24.3628	23.5706	23.1734	23.6016	23.8051	23.6359	21.6137	25.1838	24.4331	23.9327	24.0726	23.8191	23.1094	20.7713	20.7104	-2.74805	-0.0703284	-0.362181	-0.89922	-0.217505	0.695645	2.86454	0.903367	3.17926	0.034468	0.205854	0.645686	0.115078	0.45988	3.37251	0.649709	1	0	0	0	0	0	1	0
3814	130.525	0.974699	Positive	NA	Unknown	21.9901	22.0557	22.3039	22.6354	23.0165	23.2962	24.6837	23.726	21.9174	23.4118	22.7146	22.9159	23.1569	23.6218	23.7937	23.7213	0.0727023	-1.35619	-0.41067	-0.280486	-0.140476	-0.325614	0.890007	0.00474135	0.0593908	2.31248	0.435954	0.270867	0.121455	0.325226	1.25389	0.00365167	0	1	0	0	0	0	0	0
3815	123.047	1.38977	Positive	NA	Unknown	21.1526	23.3084	23.9987	23.3587	24.598	24.6315	26.176	24.6092	22.0758	23.2695	22.6289	23.2355	24.2199	23.3569	24.18	24.1137	-0.923138	0.0389702	1.36989	0.123237	0.378049	1.27461	1.99595	0.495475	1.03721	0.0259668	1.8328	0.087258	0.317206	1.65002	3.16295	0.446321	0	0	0	0	0	0	1	0
3816	137.059	7.48328	Positive	NA	Unknown	23.3063	20.8848	20.4882	21.1649	21.3276	19.8134	19.7755	20.2389	25.6406	24.0416	22.8808	22.5137	21.3717	20.8842	19.3692	19.4848	-2.33436	-3.15675	-2.3926	-1.34878	-0.0440805	-1.07079	0.406306	0.754148	5.83463	8.3759	6.01966	2.74758	0.0399897	1.96435	0.505273	1.18183	1	1	1	1	0	0	0	0
3817	166.025	0.951354	Positive	NA	Unknown	23.7847	23.6526	23.8242	23.5569	23.7416	23.6872	22.2451	11.9145	23.6805	23.475	23.0038	22.8925	23.5177	22.7353	21.506	13.6102	0.104209	0.177617	0.820417	0.664422	0.223829	0.951896	0.739142	-1.69569	0.0953891	0.17349	1.25119	0.927302	0.22741	1.55106	1.07789	3.57468	0	0	0	0	0	0	0	1
3819	129.042	0.717467	Positive	NA	Unknown	24.0231	24.3575	24.2743	23.818	22.3205	21.5107	22.176	17.7581	23.7096	23.8666	23.749	23.3238	22.503	21.0595	19.3397	15.7834	0.31357	0.490915	0.525321	0.494206	-0.18244	0.45123	2.83632	1.97463	0.186635	0.319302	0.347361	0.321953	0.101287	0.287876	3.62069	2.15097	0	0	0	0	0	0	1	1
3820	146.08	3.42321	Positive	NA	Unknown	22.2865	23.7451	23.151	22.8286	22.7234	22.5278	21.0895	22.0962	24.7641	23.2618	23.8037	25.1558	24.9311	23.2662	21.7013	21.1652	-2.47761	0.483367	-0.652621	-2.3272	-2.20775	-0.738343	-0.611844	0.930997	2.41735	0.261884	0.379433	2.20676	2.04355	0.444168	0.349866	0.602308	1	0	0	1	1	0	0	0
3821	106.111	0.813515	Positive	NA	Unknown	21.7656	21.6009	20.8661	21.8166	21.5712	21.7559	18.4358	17.8591	23.8306	23.5543	23.8188	23.559	22.8303	22.505	20.2137	18.6184	-2.06498	-1.95342	-2.95267	-1.74239	-1.25907	-0.749099	-1.77798	-0.759299	2.19708	2.02615	3.6719	1.71497	1.0735	0.52683	1.76626	0.536307	1	1	1	0	0	0	0	0
3822	367.134	7.57379	Positive	NA	Unknown	20.0195	19.0947	20.5292	16.4553	8.12453	3.67148	8.26751	10.5756	24.3951	24.2985	22.6845	17.8274	15.1151	12.5315	12.577	6.96142	-4.37561	-5.20383	-2.15534	-1.37207	-6.99052	-8.85999	-4.30954	3.61422	0.913254	1.16728	0.356722	0.206271	1.7891	2.52686	0.89402	0.701258	0	0	0	0	0	1	0	0
3827	210.06	1.89141	Positive	NA	Unknown	26.0892	25.7432	26.5731	26.4952	26.3911	27.1525	25.2173	21.0203	23.5963	22.9376	23.3102	24.3113	24.5999	23.144	23.0269	20.6117	2.49292	2.80559	3.26291	2.18395	1.79119	4.00855	2.1904	0.408615	7.28524	8.34818	9.82796	6.20163	4.79776	12.0378	6.22451	0.592701	1	1	1	1	1	1	1	0
3828	154.049	5.71928	Positive	NA	Unknown	24.8786	25.4393	25.6702	25.378	25.2449	22.8105	21.1955	21.6431	24.9129	25.4704	25.5904	25.4272	25.1812	21.3998	20.1535	18.4717	-0.0342582	-0.0310874	0.0798097	-0.0492367	0.0636745	1.41064	1.04199	3.17139	0.02155	0.0195122	0.0518109	0.0312967	0.0408802	1.77107	1.14301	5.54143	0	0	0	0	0	0	0	1
3831	116.51	1.0899	Positive	NA	Unknown	22.8547	22.8435	23.1656	23.5926	24.2243	24.3156	24.1	23.9203	23.8696	23.5364	23.1938	23.2497	23.9874	24.287	24.4525	24.1068	-1.01482	-0.692957	-0.0282346	0.342849	0.23686	0.0286066	-0.352476	-0.186476	2.76124	1.58497	0.0339468	0.590703	0.365758	0.0344108	0.613005	0.272206	1	0	0	0	0	0	0	0
3834	298.095	7.35607	Positive	NA	Unknown	23.927	25.0292	23.6752	22.6046	24.2028	23.5014	18.5311	14.608	19.4742	23.2358	23.7281	23.7183	22.6001	21.3238	17.1995	17.1577	4.45279	1.7934	-0.0528976	-1.11374	1.60268	2.17758	1.3316	-2.54966	1.99521	0.554318	0.0113109	0.301896	0.478235	0.71978	0.377127	0.895145	1	0	0	0	0	0	0	0
3838	148.096	1.57132	Positive	NA	Unknown	23.5032	23.9267	25.0522	24.1595	23.6908	22.7574	22.1029	22.2705	23.581	24.2401	24.2748	24.163	23.6183	22.2667	21.8235	21.0984	-0.0777491	-0.313349	0.777457	-0.00347607	0.072453	0.490685	0.279455	1.17215	0.083164	0.422942	1.47322	0.00342593	0.0770581	0.767461	0.365732	2.6776	0	0	0	0	0	0	0	1
3840	200.101	0.731523	Positive	NA	Unknown	23.7815	23.8222	23.7067	23.6078	22.8266	22.7058	23.512	19.2679	23.169	23.1297	23.1172	22.89	22.8634	22.515	21.7683	18.5684	0.61251	0.692427	0.589469	0.717792	-0.0367982	0.190887	1.74372	0.699555	0.718592	0.850947	0.682028	0.89472	0.0284665	0.167453	3.21518	0.863163	0	0	0	0	0	0	1	0
3845	138.007	2.25868	Positive	NA	Unknown	23.8181	23.5372	23.6	23.3256	23.069	22.4116	21.2059	21.7019	23.9297	24.4022	24.076	24.0006	23.7321	22.4743	19.7852	21.4326	-0.111658	-0.864997	-0.476001	-0.674999	-0.663139	-0.0626814	1.42077	0.269298	0.104285	1.37419	0.596992	0.964457	0.940715	0.0559539	2.82684	0.288344	0	0	0	0	0	0	1	0
3851	284.075	7.58759	Positive	NA	Unknown	22.46	21.4596	20.576	19.0389	16.7506	17.2871	18.183	15.5953	23.878	24.2816	23.6908	19.3869	13.511	14.3979	15.1915	-8.03801e-14	-1.41799	-2.82199	-3.11479	-0.347921	3.23953	2.88929	2.99148	15.5953	0.572327	1.49728	1.72842	0.105827	1.83026	1.54939	1.62969	13.0417	0	0	0	0	0	0	0	1
3853	268.103	5.56671	Positive	NA	Unknown	22.3759	23.2744	22.3087	23.7199	24.8448	25.161	24.8795	23.9855	23.9802	22.102	23.472	25.3008	24.822	24.3051	19.8508	23.2807	-1.60427	1.17242	-1.16337	-1.58098	0.0228748	0.85589	5.02867	0.704843	1.16652	0.751368	0.743418	1.1424	0.00935358	0.492928	5.86046	0.38403	0	0	0	0	0	0	1	0
3856	129.065	1.06265	Positive	NA	Unknown	17.4305	19.8149	18.9468	21.9635	23.5283	21.6838	21.6494	20.8528	19.7874	20.5448	21.0829	23.6746	22.9139	24.5043	23.2952	21.7566	-2.35683	-0.729863	-2.13617	-1.71101	0.614371	-2.8205	-1.64574	-0.903838	2.23488	0.435388	1.93639	1.40218	0.349939	2.89914	1.3256	0.575922	1	0	0	0	0	1	0	0
3857	275.109	3.34637	Positive	NA	Unknown	24.3402	24.0163	24.5352	23.5624	23.3161	23.711	25.373	22.891	23.715	23.3813	23.2655	22.2891	23.9232	22.3611	24.2017	19.5345	0.625156	0.635061	1.26972	1.27329	-0.607078	1.34991	1.17131	3.35647	0.48692	0.497017	1.29138	1.29661	0.468682	1.41071	1.15029	5.15274	0	0	0	0	0	0	0	1
3858	185.041	2.3705	Positive	NA	Unknown	26.5521	24.4866	25.771	25.7625	25.3435	24.3801	25.4602	22.0123	26.0873	27.8617	26.1413	26.2093	25.3615	25.1412	23.95	23.4458	0.464765	-3.37511	-0.370262	-0.446753	-0.0180311	-0.761067	1.51014	-1.43347	0.27489	4.19761	0.209483	0.262041	0.00853032	0.512206	1.32033	1.22501	0	1	0	0	0	0	0	0
3859	381.113	7.75286	Positive	NA	Unknown	21.8485	20.9136	23.2655	22.1265	21.5347	20.6021	18.9667	11.1266	23.1141	23.4547	24.093	23.2075	22.4286	20.0961	16.8319	11.4715	-1.26552	-2.54109	-0.827475	-1.081	-0.893882	0.505999	2.1348	-0.344907	1.05808	2.90277	0.589058	0.847922	0.653408	0.313353	2.25532	0.197785	0	1	0	0	0	0	1	0
3860	139.53	1.25984	Positive	NA	Unknown	24.9024	24.6703	25.6717	24.4052	23.2536	22.707	22.6627	20.415	26.5784	26.8411	26.5067	24.5283	23.9442	23.3185	21.5269	20.496	-1.67598	-2.17074	-0.834964	-0.123133	-0.690595	-0.611581	1.13579	-0.0810624	2.56612	3.71261	0.938398	0.0900135	0.721349	0.611938	1.45649	0.0574552	1	1	0	0	0	0	0	0
3861	227.163	9.05454	Positive	NA	Unknown	24.1282	24.2451	24.4872	24.0876	23.9516	23.9549	22.8554	20.4336	23.491	23.2117	23.7576	24.4804	23.9314	23.1843	21.2854	16.1002	0.637248	1.03337	0.729576	-0.392764	0.0202295	0.770636	1.56999	4.33341	0.81288	1.61873	0.982054	0.426314	0.0162365	1.06115	2.97251	10.573	0	0	0	0	0	0	1	1
3862	204.605	10.2479	Positive	NA	Unknown	16.4481	19.0576	19.7914	18.9652	19.8762	21.0025	22.1239	20.6977	24.0518	23.2714	22.7807	19.9619	19.0179	19.0091	19.8644	15.729	-7.60372	-4.21377	-2.98928	-0.996686	0.858278	1.99339	2.25944	4.96863	11.8062	6.17285	3.91689	0.811193	0.661082	2.19291	2.63078	7.53577	1	1	1	0	0	1	1	1
3863	177.054	9.39218	Positive	NA	Unknown	18.4556	18.261	16.9564	19.0681	20.0815	18.7365	21.0318	16.4933	23.7417	24.7202	24.3135	22.9693	19.7607	18.3269	15.1508	14.5234	-5.28617	-6.45917	-7.35715	-3.90114	0.320854	0.40961	5.88096	1.9699	8.52332	10.5352	11.9523	5.9364	0.2032	0.271898	9.56627	2.30495	1	1	1	1	0	0	1	1
3864	154.085	2.80926	Positive	C8H11NO2	DOPAMINE	25.0066	25.0695	24.7076	23.6992	23.018	22.7209	20.6839	18.6204	24.6818	25.0321	24.4896	23.2106	22.2695	20.5695	18.8279	17.1208	0.324787	0.0374813	0.218006	0.488557	0.748454	2.15145	1.85604	1.49955	0.308589	0.0285058	0.191466	0.518733	0.926294	4.21273	3.42898	2.52513	0	0	0	0	0	1	1	1
3865	229.153	6.00709	Positive	NA	Unknown	21.2374	20.9158	19.7376	18.2939	20.0319	22.0321	21.6693	21.2713	25.2177	25.2546	25.0338	24.2346	22.8965	23.4045	23.1496	21.5238	-3.98031	-4.33882	-5.2962	-5.94072	-2.86458	-1.37239	-1.48027	-0.252456	6.29957	6.99996	8.80164	9.94647	4.08669	1.41691	1.58129	0.158874	1	1	1	1	1	0	0	0
3870	131.07	3.45464	Positive	NA	Unknown	23.9967	23.4254	22.7542	22.4652	22.631	22.1196	22.3351	22.9478	25.7649	24.6605	22.9037	23.3956	21.7545	21.6906	21.4659	22.6884	-1.76819	-1.23513	-0.149522	-0.930495	0.876497	0.428936	0.869176	0.259375	3.32971	1.98225	0.128468	1.31352	1.20538	0.453919	1.19098	0.242904	1	1	0	0	0	0	0	0
3874	165.054	7.45286	Positive	NA	Unknown	23.7378	23.1302	21.9955	22.3185	21.929	21.6639	20.2122	19.1869	24.7325	22.9242	20.1217	20.4125	19.8805	19.723	17.4897	17.4572	-0.994683	0.20598	1.87382	1.90607	2.04846	1.9409	2.72255	1.72963	0.850037	0.12103	2.11094	2.16413	2.40346	2.222	3.61349	1.87822	0	0	1	1	1	1	1	0
3877	214.043	7.42309	Positive	NA	Unknown	22.1759	21.8103	22.2856	22.8171	22.8064	22.5667	22.9327	17.7274	22.8838	22.6877	22.9403	22.4804	22.4531	20.4088	19.5034	12.1972	-0.70784	-0.877332	-0.654682	0.336747	0.353224	2.15787	3.42928	5.53017	0.796902	1.07671	0.715877	0.302525	0.320881	3.93571	7.1764	11.9282	0	0	0	0	0	1	1	1
3879	265.141	8.16912	Positive	NA	Unknown	22.1879	22.6748	23.072	21.7621	20.8413	19.2125	18.9936	20.5629	22.7681	23.5119	23.4495	22.4649	21.6038	19.1399	16.9393	17.5973	-0.580135	-0.837069	-0.377473	-0.702768	-0.762487	0.0725645	2.05432	2.96562	0.600552	0.994553	0.344587	0.779229	0.872501	0.053242	3.62848	5.93679	0	0	0	0	0	0	1	1
3881	339.105	8.32037	Positive	NA	Unknown	25.3706	25.5671	25.1068	23.8495	22.4188	21.0485	18.2626	11.0065	24.2623	23.7124	23.0161	21.5278	19.6507	15.8696	13.4328	13.0187	1.1083	1.85472	2.09074	2.32172	2.76813	5.17892	4.82972	-2.0122	0.5658	1.15212	1.36848	1.59297	2.05844	4.98682	4.54192	1.29497	0	0	0	0	1	1	1	0
3882	279.097	7.68951	Positive	NA	Unknown	24.4227	23.7161	22.618	19.4717	15.0698	13.3832	14.3323	2.66454e-15	25.1015	21.6734	17.706	15.8532	13.8216	12.9457	13.4427	3.36693	-0.678801	2.04274	4.91203	3.6185	1.24822	0.437487	0.889592	-3.36693	0.210146	0.861009	3.04654	1.9558	0.444683	0.126969	0.290669	1.76067	0	0	1	0	0	0	0	0
3883	156.577	6.62951	Positive	NA	Unknown	23.2879	22.3704	22.744	23.6934	21.1749	23.5034	20.2161	6.66134e-15	21.691	19.4573	23.9353	24.0231	11.9413	18.0935	17.647	3.35336	1.59689	2.91301	-1.19127	-0.329704	9.23358	5.40989	2.56911	-3.35336	0.195878	0.407572	0.139908	0.0351524	2.01771	0.934391	0.347791	0.488724	0	0	0	0	1	0	0	0
3884	393.032	2.25112	Positive	NA	Unknown	22.7969	22.7574	22.2229	21.7479	21.3678	20.1642	18.2151	19.0125	23.2329	23.8009	23.0239	23.0568	22.5098	20.1446	15.2496	18.5307	-0.435952	-1.04351	-0.801076	-1.30893	-1.14194	0.0196495	2.96548	0.4818	0.248906	0.763864	0.534932	1.0484	0.865366	0.00913412	3.41662	0.280891	0	0	0	0	0	0	1	0
3886	226.106	6.08974	Positive	NA	Unknown	10.8642	16.2332	21.1781	20.2698	21.2244	21.5803	19.2344	15.5275	15.7077	24.3511	24.7872	22.2248	22.1036	22.3698	21.8796	19.1362	-4.84344	-8.11791	-3.60909	-1.95501	-0.879148	-0.789502	-2.64512	-3.6087	1.40052	2.96567	0.920739	0.405234	0.155037	0.137235	0.60142	0.920598	0	1	0	0	0	0	0	0
3888	190.124	10.4026	Positive	NA	Unknown	23.9616	26.3763	23.1227	23.0918	22.9499	20.3736	19.8132	14.6216	19.3552	24.679	23.6177	19.088	16.9338	19.7062	15.7006	18.0324	4.60642	1.69726	-0.495001	4.00382	6.0161	0.667453	4.11263	-3.41077	1.59424	0.404266	0.095421	1.30137	2.35261	0.132912	1.35267	1.03495	0	0	0	0	1	0	0	0
3894	407.073	0.736977	Positive	NA	Unknown	22.5367	22.4375	22.6164	23.2748	23.4693	21.608	20.8983	5.97957	19.1809	21.0261	21.0189	21.8978	22.5746	21.7392	19.9256	-2.88658e-15	3.35578	1.41144	1.59749	1.37696	0.894658	-0.131239	0.972707	5.97957	0.871837	0.281653	0.327968	0.273309	0.164393	0.0211496	0.181036	1.99869	0	0	0	0	0	0	0	1
3898	103.054	6.22146	Positive	NA	Unknown	16.5071	16.9956	21.0824	17.7553	18.8433	19.6046	17.3892	11.4705	19.9911	25.3166	24.48	20.3166	19.5863	19.4987	19.0149	14.2537	-3.48392	-8.321	-3.39755	-2.56128	-0.742974	0.105913	-1.62568	-2.7832	8.04627	17.8415	7.81824	5.53306	0.956428	0.0880382	2.96349	6.15004	1	1	1	1	0	0	1	1
3901	291.068	6.12076	Positive	NA	Unknown	16.852	21.0561	19.7943	20.2609	19.5517	18.6315	18.5185	17.9083	23.8892	23.527	23.1315	22.0852	21.9406	19.4768	12.8725	17.934	-7.03716	-2.47092	-3.3372	-1.82426	-2.38886	-0.845291	5.646	-0.0257222	2.14611	0.494221	0.738962	0.335667	0.472945	0.135383	1.55681	0.00362701	1	0	0	0	0	0	0	0
3902	239.061	7.67239	Positive	NA	Unknown	17.7718	16.4765	19.2654	19.6375	18.8834	16.6711	18.0755	5.32907e-15	22.5686	23.0134	22.891	22.3761	21.039	18.806	13.2686	1.86517e-14	-4.79685	-6.53693	-3.6256	-2.73863	-2.15561	-2.13494	4.80691	-1.33227e-14	8.48505	11.6728	6.08684	4.20586	3.00415	2.9629	8.50485	0	1	1	1	1	1	1	1	0
3903	351.213	10.2936	Positive	NA	Unknown	18.5412	18.2861	19.1061	18.6039	19.2159	20.1007	21.5706	19.2889	24.5404	23.2624	22.5558	19.7158	18.5648	18.5496	19.7192	17.1784	-5.99925	-4.9763	-3.44971	-1.11193	0.651105	1.5511	1.85138	2.11044	8.56674	6.89871	4.29771	0.8498	0.415952	1.36312	1.7625	2.13351	1	1	1	0	0	0	0	1
3905	281.069	0.769216	Positive	NA	Unknown	24.5829	24.9811	24.8012	24.4219	23.4164	23.9756	24.2624	15.3705	24.1292	24.36	23.4632	23.4026	23.2746	22.8016	19.7869	15.5306	0.453696	0.621094	1.33797	1.01928	0.141801	1.17396	4.47555	-0.160135	0.148084	0.21294	0.554971	0.390025	0.0420365	0.467518	3.07719	0.0477486	0	0	0	0	0	0	1	0
3906	206.101	1.04939	Positive	NA	Unknown	22.0958	22.5247	22.8413	22.9892	23.2962	22.9751	22.0261	21.5246	22.3216	22.5426	23.652	24.6512	23.7087	23.2251	21.8182	20.714	-0.225759	-0.0178756	-0.810688	-1.66203	-0.412543	-0.250009	0.207868	0.810613	0.235911	0.015451	1.26987	3.58573	0.500681	0.266676	0.213899	1.2697	0	0	0	1	0	0	0	0
3910	218.101	7.22445	Positive	NA	Unknown	22.8943	22.8769	22.6581	21.6855	20.7045	20.036	20.2391	20.6895	23.3294	23.3251	23.2857	22.547	21.1722	19.5361	19.3272	18.5749	-0.435152	-0.448205	-0.627683	-0.861484	-0.467708	0.499943	0.911848	2.11456	0.515226	0.535665	0.845487	1.32452	0.566743	0.619513	1.43785	4.78036	0	0	0	0	0	0	0	1
3911	533.654	0.870546	Positive	NA	Unknown	23.1579	22.9907	21.745	22.8735	23.2255	21.5934	19.8969	7.54952e-15	22.9458	22.7644	22.6488	22.4544	22.4101	22.6491	12.9991	4.57412e-14	0.212019	0.226291	-0.903783	0.419176	0.815355	-1.05567	6.89775	-3.81917e-14	0.0309563	0.0331152	0.146826	0.0632382	0.130717	0.175397	2.09924	0	0	0	0	0	0	0	1	0
3916	353.082	7.07372	Positive	NA	Unknown	21.4325	21.5463	22.0646	22.0326	21.747	20.915	19.2311	15.9723	22.1949	22.8072	23.3066	23.0848	22.071	20.5314	18.9665	14.4287	-0.762436	-1.26094	-1.24201	-1.05219	-0.323994	0.383565	0.264641	1.54357	1.47342	3.05932	2.99376	2.35548	0.452796	0.564853	0.35008	4.06681	0	1	1	1	0	0	0	1
3917	241.153	6.25997	Positive	NA	Unknown	20.1728	20.1698	19.7162	17.6071	18.985	21.5943	21.7529	20.0246	23.9699	24.6518	24.2689	22.9965	22.0375	22.5507	22.4024	21.0393	-3.79707	-4.48196	-4.55266	-5.38941	-3.05245	-0.95643	-0.649448	-1.01463	5.97041	7.3136	7.44966	9.01307	4.48394	0.853207	0.505712	0.926599	1	1	1	1	1	0	0	0
3918	344.132	7.80162	Positive	NA	Unknown	22.1878	22.4164	23.0105	22.8321	22.5466	22.2959	21.3776	14.6663	22.7272	22.3404	22.6153	22.4439	22.118	20.9	18.8898	10.9049	-0.539474	0.075958	0.395162	0.388237	0.428556	1.3959	2.48779	3.76142	0.570261	0.0579195	0.380864	0.372455	0.422288	2.1861	4.93873	8.22144	0	0	0	0	0	1	1	1
3919	183.085	0.715164	Positive	NA	Unknown	21.3858	22.0862	22.3443	21.8924	22.0557	22.7735	23.5225	25.162	21.9994	22.3406	22.4414	22.6971	22.6227	22.7509	22.173	24.9516	-0.613603	-0.254448	-0.0970946	-0.804731	-0.567018	0.0225524	1.34949	0.210347	0.821711	0.262906	0.0876234	1.20461	0.737007	0.0190031	2.55197	0.209529	0	0	0	0	0	0	1	0
3925	351.213	10.8721	Positive	NA	Unknown	14.5404	18.1839	19.4098	20.1076	22.2253	25.7596	27.9813	24.7991	17.9158	22.4914	25.0503	22.2664	21.637	21.8591	22.8282	19.5558	-3.37537	-4.30753	-5.64046	-2.15876	0.588228	3.90052	5.15309	5.24328	3.11175	4.3763	6.22646	1.62638	0.282396	3.81681	5.55165	5.67694	1	1	1	0	0	1	1	1
3926	129.018	1.89109	Positive		Citrate source fragment (+H and + NH3)	25.4782	25.0966	25.9347	25.811	25.6921	26.498	24.4672	20.4902	23.1384	22.7793	23.0402	23.8534	23.9372	22.7677	22.4301	20.0891	2.33983	2.31721	2.89449	1.95763	1.75492	3.73021	2.03713	0.401022	7.60609	7.52037	9.6274	6.12974	5.32971	12.3549	6.44106	0.661187	1	1	1	1	1	1	1	0
3929	134.063	6.85543	Positive	NA	Unknown	24.4721	26.526	24.867	24.6485	24.0976	23.7251	22.1968	17.5599	21.2805	25.0988	24.4201	21.6585	20.7214	20.3793	17.9112	19.0273	3.19159	1.42722	0.446941	2.98998	3.37625	3.34575	4.28562	-1.46738	2.31333	0.731697	0.170967	2.1035	2.51037	2.47753	3.53301	0.760082	1	0	0	1	1	1	1	0
3932	234.556	7.42732	Positive	NA	Unknown	22.0605	21.7754	22.3672	22.6982	22.6298	22.4366	22.672	17.307	22.5452	22.3681	22.58	22.1107	22.1194	19.8933	19.0158	11.0613	-0.484709	-0.592695	-0.212748	0.587515	0.510386	2.54333	3.65622	6.24572	0.682198	0.900187	0.239157	0.889208	0.731938	6.89258	10.3189	16.5283	0	0	0	0	0	1	1	1
3935	210.096	1.15831	Positive	NA	Unknown	22.9593	22.7273	22.9394	23.0841	22.6902	21.771	21.298	22.9692	22.2549	22.2868	22.1752	23.195	22.4984	21.8272	20.9754	19.6491	0.704472	0.44052	0.764211	-0.110883	0.191754	-0.0562424	0.322605	3.32009	1.06293	0.557482	1.19375	0.1065	0.198237	0.0512914	0.372635	8.79631	0	0	0	0	0	0	0	1
3936	174.148	8.17123	Positive	NA	Unknown	19.7003	21.725	22.4808	20.3964	19.7986	18.2871	16.3027	17.1875	21.8832	23.4415	23.421	22.3535	21.6774	19.5125	17.4303	17.9344	-2.18291	-1.71655	-0.940188	-1.95714	-1.87873	-1.22535	-1.12758	-0.746922	3.50443	2.48282	1.03873	3.00036	2.82912	1.51952	1.34721	0.753398	1	1	0	1	1	0	0	0
3939	175.107	0.928829	Positive	NA	Unknown	21.9762	21.9556	21.2312	20.7823	20.8452	20.032	15.6732	17.1203	24.2083	22.8614	22.8951	23.2321	21.7356	19.9811	19.2192	16.3821	-2.23212	-0.905831	-1.66385	-2.44977	-0.890397	0.0508579	-3.54601	0.738245	3.63338	0.990213	2.38458	4.13503	0.966517	0.0336958	6.69499	0.744876	1	0	1	1	0	0	1	0
3941	76.076	0.760061	Positive	NA	Unknown	21.3755	21.4117	17.9561	19.9379	21.7178	21.6555	19.1107	17.5381	22.3189	22.8203	23.118	21.8681	21.6226	21.3744	20.0323	20.1172	-0.943408	-1.40855	-5.16189	-1.93016	0.0952548	0.281098	-0.921583	-2.57912	0.807383	1.42567	8.3508	2.25545	0.0534287	0.175318	0.781703	3.42353	0	0	1	1	0	0	0	1
3945	136.562	7.68856	Positive	NA	Unknown	23.8371	25.3519	23.734	25.6659	25.3215	24.2483	25.1161	12.609	20.8899	22.1693	21.2249	24.9272	23.4991	23.6133	23.2327	13.9865	2.9472	3.18261	2.50917	0.738698	1.82244	0.635029	1.8834	-1.37752	2.80146	3.12807	2.21829	0.405414	1.39276	0.33512	1.4607	0.934316	1	1	1	0	0	0	0	0
3949	267.057	2.75747	Positive	C9H12N2O6	URIDINE	21.4227	23.4474	22.654	22.281	22.727	23.0016	22.7336	20.7003	24.4422	23.5768	22.554	23.0079	22.8575	22.137	19.3992	19.6636	-3.01954	-0.129401	0.0999918	-0.726906	-0.130555	0.864595	3.33441	1.03662	2.90615	0.0553749	0.0422261	0.397822	0.055898	0.49753	3.34843	0.632977	1	0	0	0	0	0	1	0
3950	277.094	7.68698	Positive	NA	Unknown	23.7007	24.6892	23.5815	24.9942	24.767	23.9889	24.5699	3.61254	22.0181	23.0684	21.9323	24.4912	23.0846	23.3421	22.9154	11.3755	1.6826	1.62078	1.64925	0.503026	1.68244	0.646842	1.65448	-7.76293	0.592728	0.563906	0.577111	0.135809	0.592653	0.180989	0.579552	5.13484	0	0	0	0	0	0	0	1
3951	302.038	0.943976	Positive	NA	Unknown	23.2486	23.8586	23.7688	22.6551	21.6477	20.4701	17.7247	4.72955e-14	23.3047	23.2489	22.9524	21.8985	21.2383	17.8525	14.2081	6.72795e-14	-0.056091	0.609694	0.816419	0.75659	0.409432	2.61752	3.51656	-1.9984e-14	0.0318255	0.47033	0.693396	0.625573	0.284996	3.66508	5.4644	0	0	0	0	0	0	1	1	0
3952	324.106	8.47725	Positive	NA	Unknown	18.8353	18.9076	17.5013	15.9525	16.5243	15.1132	13.8926	8.51486	23.2214	23.3527	22.7735	22.1268	20.4187	19.6727	17.1194	3.51559	-4.38613	-4.44517	-5.27217	-6.17438	-3.89445	-4.55948	-3.22677	4.99927	1.35969	1.38621	1.77613	2.2363	1.14625	1.43807	0.878883	1.64379	0	0	0	1	0	0	0	0
3953	213.035	6.80318	Positive	NA	Unknown	23.2515	22.8943	23.1448	22.7601	21.4495	21.1539	20.6474	17.1866	22.4052	23.0287	22.6946	21.5705	21.0768	19.1919	16.9963	11.4248	0.846298	-0.134417	0.450262	1.18967	0.372749	1.962	3.65114	5.76179	1.38297	0.131984	0.574091	2.27027	0.448178	4.60903	9.74062	14.8639	0	0	0	1	0	1	1	1
3954	161.032	2.69769	Positive	NA	Unknown	23.4582	23.3845	23.9623	23.5322	23.2705	23.1576	23.0902	23.1974	23.9119	23.8601	23.7818	22.5753	22.5297	21.3169	21.366	20.4938	-0.453697	-0.475646	0.180475	0.956916	0.740778	1.84068	1.72421	2.70355	0.893083	0.954233	0.268779	2.61939	1.80428	6.39128	5.88838	9.90131	0	0	0	0	0	1	1	1
3958	208.096	6.14812	Positive	NA	Unknown	13.9195	15.323	20.8116	19.8094	20.754	21.1518	18.9134	13.625	15.7071	23.9383	24.3722	21.6573	21.6282	21.7703	21.4385	18.6725	-1.78762	-8.61525	-3.56055	-1.84794	-0.874185	-0.618565	-2.52519	-5.04756	0.779548	6.99684	2.09009	0.816118	0.306864	0.202566	1.26879	3.45712	0	1	1	0	0	0	0	1
3959	245.173	9.01581	Positive	NA	Unknown	23.0595	23.1339	23.3943	23.195	23.1138	23.0866	21.9679	19.3747	22.177	21.9074	22.7629	23.6985	23.1374	22.3826	20.4822	14.4902	0.882438	1.22649	0.631404	-0.503517	-0.0236715	0.704032	1.48576	4.88457	1.17824	1.89824	0.736917	0.543403	0.0178887	0.856471	2.50997	11.1922	0	0	0	0	0	0	1	1
3960	199.541	6.5278	Positive	NA	Unknown	23.6185	23.3472	23.7956	23.4483	23.0625	22.7915	21.2922	15.455	22.8385	22.6705	22.703	22.3937	22.0126	19.4835	18.0909	6.91422	0.780051	0.676706	1.09254	1.05463	1.04988	3.30804	3.20139	8.54075	0.261412	0.220567	0.396737	0.379371	0.377214	1.82988	1.7445	6.77842	0	0	0	0	0	0	0	1
3961	275.199	10.2256	Positive	NA	Unknown	16.8056	18.3462	19.0982	18.2222	19.1443	20.1145	21.3184	19.3872	23.7792	22.7153	22.1395	19.2352	18.2101	18.1137	18.9891	13.708	-6.9736	-4.3691	-3.04138	-1.01304	0.934199	2.00085	2.32928	5.67917	9.6456	5.57424	3.40822	0.706856	0.633362	1.86032	2.32184	7.68786	1	1	1	0	0	0	1	1
3964	611.137	7.13596	Positive	NA	Unknown	27.1553	27.5235	27.5504	26.8184	26.7592	26.8741	24.5938	15.8115	23.4145	22.7342	22.4527	21.4444	21.8733	18.6749	18.9775	7.52647	3.74083	4.78927	5.09769	5.37401	4.88594	8.1992	5.61638	8.285	1.56453	2.24272	2.45586	2.65115	2.30894	4.79192	2.82548	4.85897	0	1	1	1	1	1	1	1
3965	188.127	2.02847	Positive	NA	Unknown	21.7644	22.2118	21.9831	21.7442	21.5997	22.2223	21.7787	20.661	23.5997	24.1445	23.5884	23.7872	22.9712	21.7608	20.5732	20.1131	-1.83533	-1.93266	-1.60531	-2.04307	-1.37153	0.461457	1.20545	0.547914	3.9781	4.27135	3.29654	4.60608	2.63003	0.561709	2.1802	0.707719	1	1	1	1	1	0	1	0
3968	205.07	1.00199	Positive	NA	Unknown	23.0743	24.1038	23.2312	23.2604	22.7798	21.8217	22.6692	19.2299	23.3554	23.4855	24.3066	23.9447	23.3554	22.1198	20.0477	19.2338	-0.28105	0.618335	-1.07542	-0.684251	-0.575577	-0.298097	2.62143	-0.00385516	0.118924	0.297935	0.605493	0.33767	0.272995	0.127006	2.13954	0.00145262	0	0	0	0	0	0	1	0
3969	87.0328	0.754055	Positive	NA	Unknown	22.735	23.112	23.0661	22.5628	21.3789	20.6199	21.2559	14.1602	22.6821	22.749	22.6728	22.2697	21.5125	20.1276	18.4194	11.433	0.0528753	0.363034	0.393323	0.293146	-0.133605	0.492287	2.83658	2.72719	0.0242323	0.193267	0.21231	0.151074	0.0637534	0.277742	3.06976	2.90141	0	0	0	0	0	0	1	1
3970	182.116	7.41581	Positive	NA	Unknown	19.1539	20.0796	20.947	20.588	20.6584	20.4249	18.9534	20.8091	19.4183	23.1079	23.751	21.1044	20.4012	19.7653	19.6785	20.6096	-0.264475	-3.02836	-2.80401	-0.516352	0.257142	0.659637	-0.725107	0.199528	0.30581	8.30328	7.60323	0.72872	0.295432	1.02483	1.17255	0.217727	0	1	1	0	0	0	0	0
3971	231.046	1.01697	Positive	NA	Unknown	24.4743	25.3919	24.8507	24.7104	23.6724	22.7509	23.4473	21.0645	23.2317	23.4025	23.0126	23.4182	22.8844	21.294	21.8707	20.6198	1.24259	1.9894	1.83804	1.29225	0.787975	1.45698	1.57661	0.444728	1.43014	2.835	2.52856	1.51373	0.751031	1.80251	2.02243	0.354525	0	1	1	0	0	0	1	0
3977	141.065	0.893436	Positive	NA	Unknown	21.4235	21.6774	22.1875	22.0669	22.0802	21.3376	16.1887	17.5889	22.3673	22.5654	23.5068	22.6465	22.2193	20.1955	18.8754	17.4694	-0.943813	-0.888064	-1.31926	-0.57964	-0.139073	1.14214	-2.68674	0.119513	1.34529	1.23243	2.18975	0.678555	0.118795	1.77447	5.88222	0.100463	0	0	1	0	0	0	1	0
3978	176.127	3.40701	Positive	NA	Unknown	21.011	20.6452	20.6153	21.3757	19.0335	17.5353	19.3501	22.0369	22.7158	22.5232	22.8207	23.9277	22.7718	23.7579	23.9598	23.8976	-1.70479	-1.87793	-2.20543	-2.55204	-3.73832	-6.22263	-4.60968	-1.86071	1.15892	1.3316	1.68115	2.07999	3.60346	7.0335	4.80432	1.31404	0	0	0	1	1	1	1	0
3980	137.059	2.80463	Positive	NA	Unknown	24.4269	24.3894	24.121	23.1048	22.3092	21.7238	19.5323	16.6372	24.0401	24.4246	23.6559	22.6467	21.5619	19.8118	19.8092	18.0163	0.386778	-0.0351939	0.465145	0.45811	0.747306	1.91195	-0.276826	-1.37906	0.325982	0.0233669	0.411156	0.403244	0.771212	2.97091	0.217481	1.8486	0	0	0	0	0	1	0	0
3981	147.043	8.30381	Positive	NA	Unknown	25.2893	25.3287	24.835	23.6152	22.5196	21.0647	19.4739	19.1221	24.1126	24.2592	23.7902	22.8879	21.841	18.8629	16.5227	15.7719	1.1767	1.0695	1.04481	0.727276	0.678603	2.20177	2.95119	3.3502	1.82577	1.58862	1.5356	0.914863	0.830648	4.46695	6.53011	7.60092	0	0	0	0	0	1	1	1
3982	215.051	1.03596	Positive	NA	Unknown	23.3021	23.21	23.1289	23.0675	23.0308	22.5934	22.1362	22.0728	21.9888	22.6589	23.1592	23.2893	22.7809	22.4182	21.9119	21.6469	1.31337	0.551128	-0.030283	-0.221869	0.249907	0.17522	0.224346	0.425901	4.35487	1.25139	0.0390861	0.365849	0.42554	0.273306	0.370998	0.868622	1	0	0	0	0	0	0	0
3983	310.09	8.37372	Positive	NA	Unknown	19.7166	19.4196	17.5857	17.2078	16.4894	14.3067	17.8026	13.6115	24.2306	23.4182	18.2789	15.1228	13.6437	11.0562	13.1714	-1.37668e-14	-4.51399	-3.9986	-0.693165	2.08506	2.84572	3.25042	4.63123	13.6115	3.08001	2.58656	0.240317	1.00843	1.57617	1.9131	3.19484	11.8033	1	1	0	0	0	0	1	1
3986	70.0373	0.745206	Positive	NA	Unknown	23.1503	23.5822	23.3345	22.9381	21.4124	20.5366	21.2179	17.999	22.8245	23.0249	22.902	22.488	21.6169	19.9711	18.1046	17.0526	0.325801	0.557323	0.432544	0.450034	-0.204511	0.565493	3.11327	0.946396	0.198801	0.381719	0.278755	0.292569	0.11695	0.388817	4.21249	0.767958	0	0	0	0	0	0	1	0
3988	321.114	1.11635	Positive	NA	Unknown	22.2989	21.488	23.8509	23.0194	22.6684	22.4048	19.3761	16.3346	22.2831	20.2176	22.2616	22.6038	22.1989	20.7634	17.6594	16.7356	0.0158133	1.27043	1.58934	0.415659	0.469527	1.64143	1.71673	-0.400997	0.00987796	1.53381	2.12572	0.33662	0.392342	2.22804	2.37836	0.32194	0	0	1	0	0	1	1	0
3989	290.978	2.23693	Positive	NA	Unknown	22.5937	22.6356	22.0777	21.8307	21.5619	20.7481	19.2151	19.6539	22.8865	23.129	22.7884	22.6075	22.3259	20.6704	17.3509	19.3502	-0.292806	-0.493393	-0.710789	-0.776745	-0.76393	0.0777091	1.86413	0.303724	0.242801	0.464866	0.756898	0.855707	0.836148	0.0553081	3.01877	0.253705	0	0	0	0	0	0	1	0
3990	234.96	0.587585	Positive	NA	Unknown	19.6782	19.7008	19.979	19.8558	20.8051	22.1309	21.8313	19.3233	19.4273	19.911	20.6753	20.7888	21.253	19.7325	20.5462	19.7904	0.250904	-0.210143	-0.696249	-0.932978	-0.44787	2.39841	1.28509	-0.467127	0.202935	0.165209	0.738818	1.11253	0.412037	4.31701	1.76677	0.434873	0	0	0	0	0	1	0	0
3991	134.995	0.604712	Positive	NA	Unknown	19.3531	18.9126	19.6427	19.2252	20.7811	21.7651	21.3961	18.7606	18.8157	20.0141	20.5041	20.3623	20.8365	19.8128	20.5125	19.4109	0.537405	-1.10153	-0.861439	-1.13719	-0.0553577	1.95234	0.88366	-0.650257	0.504505	1.36077	0.958186	1.42491	0.0378408	3.12233	0.993197	0.650098	0	0	0	0	0	1	0	0
3997	226.054	7.07286	Positive	NA	Unknown	19.145	18.5807	19.8626	20.461	20.1243	19.2662	18.6203	12.5156	21.6591	22.231	22.5771	22.5996	21.635	20.3919	18.4648	4.48734	-2.51413	-3.65029	-2.71454	-2.13857	-1.51077	-1.12567	0.155499	8.02823	0.868938	1.4782	0.967506	0.695342	0.438905	0.303161	0.0338225	4.56764	0	0	0	0	0	0	0	1
3999	179.054	0.762385	Positive	NA	Unknown	24.012	24.9006	24.4922	23.8669	21.7436	20.8838	21.9359	20.7307	22.9406	23.5723	22.715	23.4094	21.3757	20.4325	20.69	20.2276	1.07142	1.32832	1.77721	0.457496	0.367925	0.451366	1.24585	0.503085	2.25305	3.07424	4.61237	0.670327	0.50146	0.658196	2.80386	0.763144	1	1	1	0	0	0	1	0
4000	215.015	1.89042	Positive		Citrate+Na	25.4109	24.966	26.0663	25.9343	25.802	26.8495	24.3162	19.9741	22.4967	22.059	22.2819	23.3658	23.6115	22.2722	21.9683	19.5266	2.91415	2.90708	3.78444	2.56848	2.19047	4.57731	2.34791	0.447495	7.5766	7.55514	10.0907	6.51241	5.32178	12.1494	5.81985	0.568069	1	1	1	1	1	1	1	0
4001	379.098	7.68011	Positive	NA	Unknown	18.4351	17.2759	19.4414	19.2405	19.8448	15.4714	16.7095	12.5176	22.8586	23.0541	22.8115	21.5109	20.2229	17.4769	13.4336	11.6803	-4.42355	-5.77816	-3.37001	-2.27038	-0.378043	-2.00555	3.27585	0.837361	4.92642	6.91566	3.38821	1.91431	0.179732	1.5978	3.25465	0.475776	1	1	1	0	0	0	1	0
4002	170.042	1.05884	Positive	NA	Unknown	22.6729	23.1057	22.8545	21.7311	20.9283	20.5305	19.6855	18.8315	22.0496	22.3962	22.801	21.4909	20.3448	19.214	20.1228	19.5091	0.623288	0.709541	0.0534994	0.240151	0.58355	1.31653	-0.437336	-0.677591	1.23171	1.48505	0.0617793	0.341534	1.12094	3.62928	0.748533	1.38921	0	0	0	0	0	1	0	0
4003	154.517	0.961732	Positive	NA	Unknown	22.5114	22.3797	22.5608	22.2722	22.5105	22.4832	21.0606	11.0768	22.4321	22.2314	21.7975	21.6588	22.2969	21.5792	20.37	7.21613	0.079297	0.148321	0.763294	0.613408	0.213579	0.904	0.690572	3.8607	0.0212824	0.0406297	0.248139	0.191617	0.0596346	0.304751	0.22023	2.22136	0	0	0	0	0	0	0	1
4004	247.131	9.93811	Positive	NA	Unknown	21.4728	22.2407	22.2258	20.9018	19.5718	17.828	18.753	19.1848	22.5554	23.3956	23.1155	21.5719	21.0632	19.4264	17.8664	16.0338	-1.08265	-1.15491	-0.889732	-0.6701	-1.49134	-1.5984	0.886555	3.15104	1.23434	1.35465	0.934091	0.632475	1.96444	2.17348	0.929414	5.60591	0	0	0	0	0	1	0	1
4005	181.052	1.1001	Positive	NA	Unknown	18.3932	18.9806	20.4827	21.0467	22.9333	23.317	22.8802	20.7349	19.7078	19.2437	20.0059	21.3416	23.2057	22.6538	21.6949	19.9949	-1.31454	-0.263112	0.476863	-0.294932	-0.27237	0.663261	1.18526	0.740052	2.91373	0.316376	0.683641	0.364758	0.330224	1.08188	2.50902	1.26535	1	0	0	0	0	0	1	0
4006	273.074	7.79483	Positive	NA	Unknown	16.8651	14.2149	12.8383	14.3058	16.6974	13.5606	12.8539	13.0135	23.2015	21.9804	22.5657	22.0886	20.498	19.2375	16.7779	10.6525	-6.33643	-7.76551	-9.72738	-7.78285	-3.80059	-5.67689	-3.92397	2.36094	5.74669	7.37857	9.49227	7.39797	2.85033	4.98038	2.98423	1.4266	1	1	1	1	1	1	1	0
4009	160.096	1.14104	Positive	NA	Unknown	21.1034	20.7411	20.6524	22.0285	21.9996	20.7812	20.9009	18.7768	21.2323	21.5767	22.2401	23.42	22.8071	21.7387	23.3794	22.6819	-0.128906	-0.835558	-1.58773	-1.39146	-0.807499	-0.957441	-2.47851	-3.90513	0.0565042	0.490263	1.18252	0.980373	0.468944	0.586768	2.25689	4.30838	0	0	0	0	0	0	1	1
4010	279.046	0.718906	Positive	NA	Unknown	22.3211	22.6584	22.469	23.9801	23.3476	22.4891	22.1272	18.746	21.0501	20.9924	22.8616	23.4611	22.5783	21.6243	20.059	17.5408	1.271	1.666	-0.392619	0.519034	0.769318	0.864788	2.06812	1.20514	1.62636	2.41272	0.329513	0.469644	0.795758	0.936555	3.29357	1.50537	0	1	0	0	0	0	1	0
4011	239.965	0.588746	Positive	NA	Unknown	19.9125	19.8291	20.286	20.098	21.0238	22.4119	22.242	19.4639	19.4825	20.1031	20.8562	21.0984	21.6459	19.8915	20.9901	20.0433	0.43002	-0.274	-0.570168	-1.0004	-0.622128	2.5204	1.25195	-0.579341	0.343064	0.199075	0.491758	1.05901	0.551515	4.00362	1.46125	0.502128	0	0	0	0	0	1	0	0
4012	476.275	12.465	Positive	NA	Unknown	16.6689	14.1238	15.2633	16.3901	8.051	15.652	8.00747	3.83121	22.9992	25.8588	25.0352	23.3712	21.6356	21.9726	15.3621	6.88183	-6.33031	-11.735	-9.77198	-6.98102	-13.5846	-6.32065	-7.35466	-3.05062	1.27203	3.11392	2.39102	1.46507	3.82876	1.26924	1.58025	0.467104	0	1	1	0	1	0	0	0
4014	153.075	0.719061	Positive	NA	Unknown	21.4442	21.8004	21.89	21.8555	22.0186	22.0807	21.7896	26.2686	20.9826	20.3385	21.8093	21.9653	22.0705	22.0262	21.7028	26.0621	0.461589	1.46192	0.0807631	-0.109887	-0.0518476	0.0544922	0.0868203	0.206537	0.831679	4.32786	0.098723	0.13905	0.0611904	0.0645205	0.1069	0.291436	0	1	0	0	0	0	0	0
4016	181.049	7.88695	Positive	NA	Unknown	22.5279	22.9556	22.8096	23.4327	23.2313	22.6899	21.1731	19.7367	21.9666	22.5342	22.4995	22.5142	21.9649	19.8643	18.275	15.9569	0.561299	0.421461	0.310115	0.918438	1.26642	2.8256	2.89804	3.77984	0.34288	0.241632	0.168634	0.649842	1.01343	3.23147	3.3498	4.83268	0	0	0	0	0	1	1	1
4019	233.062	0.785975	Positive	NA	Unknown	22.1748	22.0052	22.4089	23.2046	23.4471	23.7206	24.4735	21.2158	24.3427	24.0548	23.5443	22.3499	23.1638	23.4658	22.6525	20.3345	-2.16787	-2.0496	-1.13542	0.854675	0.283269	0.254801	1.82103	0.881334	3.86174	3.57022	1.51952	1.01098	0.239958	0.211615	3.0182	1.05593	1	1	0	0	0	0	1	0
4020	231.137	8.91144	Positive	NA	Unknown	21.5058	21.1352	20.5449	20.2101	19.8801	18.897	18.012	15.3435	23.705	23.6387	22.7316	21.9316	20.6478	18.993	13.6278	10.7678	-2.19922	-2.50352	-2.18671	-1.72155	-0.767746	-0.0959268	4.38411	4.57566	2.32151	2.80115	2.30231	1.62458	0.526435	0.047902	6.02339	6.3543	1	1	1	0	0	0	1	1
4022	165.064	0.756965	Positive	NA	Unknown	22.841	23.4956	23.4779	22.7584	20.8734	20.054	20.8553	15.5742	22.5028	22.6635	21.351	22.0768	21.1768	19.0243	18.2313	17.9433	0.338296	0.832085	2.12693	0.681616	-0.303438	1.02974	2.62397	-2.36912	0.155914	0.464232	1.70884	0.359936	0.137816	0.614915	2.32105	1.99988	0	0	0	0	0	0	1	1
4023	224.075	0.941293	Positive	NA	Unknown	24.0807	24.301	24.6838	24.4465	23.1547	22.9109	20.9737	19.7245	21.745	22.6004	23.6396	23.2984	22.5545	20.9253	19.3997	15.8631	2.33572	1.70064	1.04416	1.14812	0.600131	1.98565	1.57399	3.86144	4.58221	2.94041	1.44728	1.66119	0.664214	3.66414	2.6299	8.53427	1	1	0	0	0	1	1	1
4024	355.1	7.90611	Positive	NA	Unknown	24.7288	24.7987	24.8999	23.7223	22.6241	22.0073	19.9347	15.4032	23.0994	22.9503	22.924	21.785	20.7665	16.9528	15.6657	13.441	1.6294	1.84842	1.97589	1.93736	1.85759	5.05444	4.26895	1.96217	2.65516	3.18269	3.49838	3.4024	3.20521	10.9835	9.23522	3.46416	1	1	1	1	1	1	1	1
4025	362.143	7.58446	Positive	NA	Unknown	20.5157	20.5302	21.2034	21.2036	21.8058	21.9035	20.941	10.5101	21.1648	21.6297	22.0998	22.1754	22.4163	21.1618	19.0508	12.952	-0.649148	-1.09955	-0.8964	-0.971778	-0.610516	0.741757	1.89026	-2.44189	0.881313	1.87738	1.39499	1.56822	0.809282	1.06334	4.08349	5.7423	0	0	0	0	0	0	1	1
4029	137.059	6.92307	Positive	NA	Unknown	23.4264	23.6318	23.0789	22.1891	21.8066	21.2325	20.28	18.6298	26.1588	26.9961	23.4336	23.1021	23.3821	21.5022	20.0414	18.1329	-2.73237	-3.36427	-0.354773	-0.912982	-1.57545	-0.269729	0.238628	0.496908	5.63193	7.2827	0.335503	1.1921	2.63199	0.240196	0.207724	0.516136	1	1	0	0	1	0	0	0
4030	144.08	8.1112	Positive	NA	Unknown	24.9394	23.7905	23.0612	21.2687	21.6742	20.6517	18.6482	16.1342	23.7913	22.2224	21.4637	20.0579	19.0382	17.9361	18.3486	15.0182	1.14806	1.56815	1.59745	1.21073	2.63599	2.71561	0.29963	1.11601	0.711162	1.09875	1.12811	0.764875	2.33213	2.43525	0.13567	0.68427	0	0	0	0	1	1	0	0
4033	99.0078	1.0678	Positive	NA	Unknown	23.3723	23.5813	23.5164	23.1476	23.045	22.5907	19.0747	14.8508	21.2746	21.5058	21.7532	22.4522	22.5069	21.7632	19.5224	15.7267	2.09768	2.07557	1.76323	0.695425	0.538072	0.827486	-0.447713	-0.875919	3.47872	3.42701	2.71383	0.716343	0.508181	0.911089	0.400769	0.986913	1	1	1	0	0	0	0	0
4036	171.533	2.7579	Positive	NA	Unknown	21.222	23.0931	22.3345	21.9089	22.4493	22.7355	22.5602	20.6767	23.8163	23.2498	22.448	22.753	22.6471	22.0569	19.3627	19.7273	-2.59432	-0.156742	-0.113443	-0.844046	-0.197805	0.678543	3.19747	0.949419	2.49811	0.0714131	0.0506458	0.512756	0.0918544	0.386974	3.37286	0.599248	1	0	0	0	0	0	1	0
4038	205.07	1.48219	Positive	NA	Unknown	22.9605	23.8919	23.74	23.6467	23.0656	22.0267	22.0318	19.3195	23.1698	23.704	23.674	24.6101	23.5103	22.1347	18.9848	17.5861	-0.209337	0.187875	0.066036	-0.963443	-0.444685	-0.108026	3.04701	1.7334	0.112018	0.0994225	0.032761	0.722694	0.267336	0.0548142	3.75173	1.6627	0	0	0	0	0	0	1	0
4039	178.133	7.55209	Positive	NA	Unknown	15.9648	21.5869	21.5026	19.5453	17.3441	18.5	19.2881	16.6266	19.6794	22.6877	24.2341	22.6004	20.3998	21.1251	21.1016	20.5071	-3.71456	-1.10078	-2.73156	-3.05507	-3.05576	-2.62507	-1.81354	-3.88048	2.71266	0.488865	1.7342	2.04175	2.04243	1.63662	0.962673	2.88902	1	0	0	1	1	0	0	1
4040	579.147	7.72194	Positive	NA	Unknown	21.3629	20.4522	20.649	19.7046	21.0433	19.4607	18.0238	18.0552	23.0991	20.3579	20.6897	18.6092	17.9109	13.6728	12.49	3.38695	-1.7362	0.0942873	-0.0406408	1.09544	3.13235	5.78795	5.5338	14.6682	0.518965	0.0200014	0.00851242	0.289545	1.16834	2.84679	2.66818	9.38467	0	0	0	0	0	1	1	1
4042	599.194	8.80025	Positive	NA	Unknown	25.4232	25.8542	25.7803	24.8398	24.6713	24.9174	23.4882	19.8586	22.2225	22.0216	22.0706	21.8281	21.4244	19.4037	18.4773	-2.13163e-13	3.20071	3.83267	3.70969	3.01172	3.24696	5.51371	5.01093	19.8586	6.42241	7.95907	7.66552	5.95167	6.537	11.6448	10.6084	27.9982	1	1	1	1	1	1	1	1
4043	179.054	1.9336	Positive	NA	Unknown	19.3617	20.4506	19.942	21.0033	21.9182	21.2018	22.319	23.0916	20.3687	20.0789	21.1723	21.7462	22.1269	22.8945	23.4276	23.8196	-1.00703	0.371772	-1.2303	-0.742896	-0.208734	-1.69268	-1.10858	-0.728022	1.49522	0.383179	2.00156	0.96734	0.19032	3.17667	1.7194	0.940216	0	0	1	0	0	1	0	0
4044	281.08	13.053	Positive	NA	Unknown	15.4209	14.2474	18.5886	18.8463	17.2571	15.2754	17.0404	14.1472	17.9581	23.9541	22.8614	20.3991	17.2686	20.1466	17.4031	16.8544	-2.53726	-9.70668	-4.27277	-1.5528	-0.0114801	-4.87126	-0.362667	-2.70716	1.39771	8.62769	2.97995	0.700072	0.00334292	3.59011	0.118272	1.53536	0	1	1	0	0	1	0	0
4045	325.088	6.59443	Positive	NA	Unknown	19.1052	18.8122	21.1121	22.1796	22.1443	21.7764	21.4361	16.2447	20.3402	20.3285	22.3381	22.0933	22.2747	21.6393	20.5694	15.6268	-1.23499	-1.51627	-1.22603	0.0862516	-0.130367	0.137023	0.866746	0.617964	1.71456	2.31253	1.69646	0.0632602	0.0988441	0.104407	1.02973	0.644803	0	1	0	0	0	0	0	0
4049	305.064	6.71789	Positive	NA	Unknown	27.5593	26.8869	24.0888	25.4785	24.1095	24.2475	22.7458	20.0527	23.4329	23.5116	23.1926	21.3603	20.5048	19.1331	17.9938	13.5487	4.12638	3.37526	0.896266	4.11822	3.60475	5.11439	4.75206	6.50397	4.90738	3.72946	0.567875	4.89446	4.08616	6.46378	5.89598	8.56714	1	1	0	1	1	1	1	1
4052	277.215	13.1018	Positive	NA	Unknown	16.4641	15.1383	17.9221	18.891	18.2681	21.8383	22.909	20.9792	21.23	22.0447	24.6201	21.2076	18.9823	19.6245	20.4737	18.5586	-4.76593	-6.90644	-6.698	-2.31669	-0.714217	2.21384	2.43531	2.42065	3.61521	5.94592	5.71849	1.27424	0.267345	1.19384	1.36934	1.35746	1	1	1	0	0	0	0	0
4053	192.122	2.04994	Positive	NA	Unknown	17.541	19.7631	19.1541	21.2791	22.2345	21.3621	19.6493	16.9241	16.979	20.6455	21.6808	23.5357	23.1398	22.2913	22.3748	20.5176	0.561995	-0.882347	-2.5267	-2.25663	-0.905289	-0.929222	-2.72552	-3.59348	0.171875	0.293548	1.18973	1.01295	0.302938	0.31283	1.32654	1.98251	0	0	0	0	0	0	0	1
4056	126.044	1.44461	Positive	NA	Unknown	21.4242	25.774	21.2415	23.2751	24.47	23.6251	23.9991	13.1372	18.7337	22.3127	12.0424	23.261	20.9319	23.3413	22.3636	12.3396	2.69047	3.4613	9.19913	0.0140924	3.5381	0.283858	1.63546	0.797565	0.451391	0.629224	2.52955	0.00169822	0.648113	0.0354939	0.243171	0.106769	0	0	1	0	0	0	0	0
4060	133.998	0.589422	Positive	NA	Unknown	19.0338	18.6163	19.3281	18.9583	20.4917	21.5364	21.197	18.1563	18.5866	19.8204	20.2879	20.1091	20.5808	19.5062	20.2476	19.1185	0.447157	-1.20408	-0.959733	-1.15086	-0.0891638	2.0302	0.949316	-0.962178	0.383095	1.48207	1.06996	1.38818	0.0605157	3.16319	1.05352	1.07384	0	0	0	0	0	1	0	0
4062	137.059	7.3928	Positive	NA	Unknown	23.2478	20.9225	20.1781	21.1127	21.3252	20.5251	20.1674	19.7314	24.3753	24.29	23.0081	22.5021	21.7153	21.0917	19.2711	19.4465	-1.12753	-3.36743	-2.83	-1.38936	-0.390019	-0.566596	0.896259	0.284918	1.63006	7.33816	5.93125	2.21016	0.380433	0.618902	1.17011	0.258215	0	1	1	1	0	0	0	0
4065	174.112	2.03016	Positive	NA	Unknown	18.1193	19.9164	19.2173	21.2595	22.175	21.3249	19.6936	16.4217	17.8456	20.5887	21.9917	23.2567	23.0274	22.1933	22.3631	21.3055	0.273717	-0.672277	-2.77438	-1.99716	-0.852386	-0.868373	-2.6695	-4.88374	0.104871	0.296678	2.04681	1.26979	0.399012	0.408569	1.93491	4.57259	0	0	1	0	0	0	0	1
4066	392.168	7.63401	Positive	NA	Unknown	17.8129	20.0331	20.8551	19.1347	4.31757	-7.10543e-15	3.44857	6.81976	21.4852	23.3309	23.4728	20.2062	17.7897	14.6106	12.2706	-3.33067e-14	-3.67222	-3.29773	-2.61767	-1.07153	-13.4721	-14.6106	-8.82204	6.81976	0.729484	0.630416	0.464656	0.157259	4.64293	5.17191	2.55891	1.75873	0	0	0	0	1	1	1	0
4067	167.073	2.12811	Positive	NA	Unknown	22.5686	23.7561	24.0567	23.0433	22.5907	22.2628	21.9875	20.4513	22.2428	23.1502	23.1616	22.777	22.3208	20.5883	19.9775	19.0165	0.325791	0.605921	0.895093	0.266333	0.269878	1.67446	2.00999	1.43476	0.286495	0.634682	1.09006	0.224814	0.228372	2.70158	3.50738	2.1585	0	0	0	0	0	1	1	1
4068	196.131	8.16644	Positive	NA	Unknown	17.1819	19.2834	20.637	18.7258	17.9306	15.1775	13.8948	16.8293	21.1335	23.0264	22.71	21.3154	20.9144	18.8647	16.9798	17.4065	-3.95155	-3.74299	-2.07298	-2.58962	-2.98378	-3.68718	-3.08505	-0.57724	6.82438	6.38582	2.86706	3.92887	4.76636	6.26779	4.98302	0.473916	1	1	1	1	1	1	1	0
4069	289.127	9.09354	Positive	NA	Unknown	22.755	21.6304	21.2662	20.2439	19.1029	19.0675	16.7155	1.68754e-14	23.2871	22.4362	22.0821	21.3182	18.5821	13.2775	3.48928	1.68754e-14	-0.532025	-0.805832	-0.815816	-1.07431	0.52079	5.79008	13.2262	0	0.164001	0.267381	0.2714	0.38161	0.160039	4.00847	10.814	0	0	0	0	0	0	1	1	0
4071	102.103	2.66874	Positive	NA	Unknown	21.9808	21.4754	21.3675	22.0555	21.7088	20.4794	18.7134	19.2861	22.8597	23.3995	23.9952	23.5773	22.5551	21.6404	20.4059	20.4837	-0.878886	-1.92403	-2.62767	-1.52187	-0.846356	-1.16096	-1.69248	-1.19758	0.904546	2.80081	4.34348	1.99213	0.858168	1.34404	2.32587	1.40573	0	1	1	1	0	0	1	0
4072	199.043	7.76782	Positive	NA	Unknown	17.9361	17.6045	19.6626	20.6889	19.7964	18.336	17.5945	3.90799e-14	21.353	21.919	22.2557	22.0828	21.3303	19.7186	16.058	-2.26485e-14	-3.41686	-4.31453	-2.59304	-1.39393	-1.53391	-1.38257	1.53656	6.17284e-14	4.28888	5.83794	2.90981	1.18265	1.35708	1.16889	1.36046	0	1	1	1	0	0	0	0	0
4073	193.536	7.77093	Positive	NA	Unknown	17.8586	17.1649	19.3263	18.8281	17.2138	14.3692	17.4904	14.4578	22.6897	22.5044	22.9616	22.2478	20.5617	18.7267	17.0308	4.16366	-4.8311	-5.33946	-3.63532	-3.41967	-3.3479	-4.35755	0.459594	10.2941	2.33412	2.69868	1.54225	1.41142	1.3688	2.00827	0.111285	6.57416	1	1	0	0	0	1	0	1
4075	179.033	6.76908	Positive	NA	Unknown	24.5362	23.7195	23.3747	22.5161	21.031	20.7641	19.8195	16.7391	22.0414	23.0441	22.4837	21.0223	20.3525	18.7019	16.1527	13.6795	2.49476	0.675358	0.891005	1.49377	0.6785	2.06211	3.66678	3.05956	4.48167	0.697312	1.02472	2.16264	0.701733	3.44172	7.31904	5.86109	1	0	0	1	0	1	1	1
4079	102.091	6.22228	Positive	NA	Unknown	20.8541	22.9977	24.4116	23.7913	23.0177	24.2132	24.2968	19.2964	20.6316	22.1122	23.4211	23.5028	21.9904	22.2177	20.9831	17.9542	0.222481	0.885568	0.990493	0.288563	1.02727	1.99556	3.31376	1.34222	0.170716	0.992248	1.16333	0.231458	1.22568	3.20839	6.34488	1.80573	0	0	0	0	0	1	1	0
4081	206.025	0.969766	Positive	NA	Unknown	22.3926	22.6013	22.6408	22.1811	21.9064	21.5245	20.5418	15.5386	22.8968	23.0087	22.5544	21.9111	21.6737	20.6811	18.0757	17.9445	-0.504197	-0.40735	0.086352	0.270078	0.232757	0.843344	2.46611	-2.40593	0.456539	0.348082	0.0595583	0.211453	0.177758	0.913284	4.25357	4.11169	0	0	0	0	0	0	1	1
4082	190.985	1.07236	Positive	NA	Unknown	21.1971	21.3681	21.6587	22.1573	22.6342	22.9969	22.7829	22.6144	22.4098	21.9492	20.9928	21.7672	22.6154	22.9232	23.0453	22.7734	-1.21266	-0.581099	0.665924	0.390058	0.018782	0.0737629	-0.262399	-0.158916	2.64	0.913366	1.10723	0.531098	0.0180095	0.0749428	0.320136	0.175898	1	0	0	0	0	0	0	0
4084	174.112	2.54544	Positive	NA	Unknown	17.6759	19.8602	19.4843	20.7293	21.4491	21.1063	19.439	16.3369	20.0231	22.073	23.3353	22.5717	22.0782	22.5559	22.6664	20.7733	-2.34714	-2.21286	-3.851	-1.84237	-0.629092	-1.44964	-3.22741	-4.43637	1.26654	1.16396	2.60081	0.898203	0.224923	0.646077	2.01128	3.18766	0	0	1	0	0	0	1	1
4087	266.101	8.54261	Positive	NA	Unknown	22.6608	22.4886	22.1452	20.4072	17.3262	12.8335	13.0222	18.0919	22.7238	22.897	22.3222	20.5056	17.597	15.8293	14.1245	13.5398	-0.0629609	-0.40846	-0.177016	-0.0983666	-0.270788	-2.99582	-1.10225	4.55213	0.0299461	0.230332	0.0892512	0.0476514	0.143016	3.4673	0.824137	6.08055	0	0	0	0	0	1	0	1
4091	116.052	13.1025	Positive	NA	Unknown	17.1988	17.6481	18.928	19.0286	17.3989	17.0349	17.5863	15.9092	18.0847	23.7056	22.6937	20.4478	18.1454	20.1317	17.77	17.2576	-0.885821	-6.05752	-3.76566	-1.41919	-0.746499	-3.09679	-0.183646	-1.3484	0.511764	7.31293	3.95617	0.972279	0.410109	3.00174	0.0802767	0.90488	0	1	1	0	0	1	0	0
4092	140.036	7.23391	Positive	NA	Unknown	19.1485	19.1993	20.6926	20.8364	20.0297	17.7999	16.9833	20.7705	21.251	22.1665	22.1293	21.907	21.478	19.8343	17.7614	18.1359	-2.10243	-2.9672	-1.43666	-1.07062	-1.44829	-2.03438	-0.778029	2.63457	3.69545	5.86518	2.13824	1.39373	2.16354	3.52856	0.884855	5.02694	1	1	1	0	1	1	0	1
4102	346.566	7.42415	Positive	NA	Unknown	21.5453	21.1207	21.589	22.2325	22.1886	21.9641	21.6957	2.57572e-14	21.3186	20.9746	21.426	20.4896	20.4007	15.708	11.7344	2.66454e-15	0.226652	0.146046	0.163018	1.74293	1.78791	6.25618	9.9613	2.30926e-14	0.105212	0.065342	0.0735086	1.37549	1.42712	7.93097	12.7537	0	0	0	0	0	0	1	1	0
4103	148.027	0.578668	Positive	NA	Unknown	19.4031	19.0816	19.609	19.2932	20.8023	21.7541	21.2823	18.8525	19.0676	20.1144	20.5695	20.3127	20.7436	19.9375	20.3991	19.3725	0.33553	-1.0328	-0.960517	-1.01943	0.0586705	1.8166	0.883156	-0.519928	0.309086	1.40234	1.26304	1.37619	0.0439502	3.1817	1.11997	0.540359	0	0	0	0	0	1	0	0
4104	369.113	7.02207	Positive	NA	Unknown	17.7489	18.5337	18.7511	18.665	19.1728	17.8675	15.3914	14.5428	19.4188	20.7067	20.4288	20.8615	21.9796	22.573	19.664	14.776	-1.66996	-2.17292	-1.67775	-2.19648	-2.80687	-4.70557	-4.27262	-0.233169	1.53796	2.25718	1.5484	2.29291	3.26554	6.51908	5.77625	0.124019	0	1	0	1	1	1	1	0
4106	183.546	8.85021	Positive	NA	Unknown	22.0292	21.0439	20.9119	19.9	18.8363	18.9315	16.4892	3.44204	22.9525	22.3768	21.9529	21.3346	19.027	15.8025	12.5867	-3.78308e-14	-0.923368	-1.33295	-1.04099	-1.43456	-0.190751	3.12904	3.90242	3.44204	0.329601	0.527055	0.383056	0.580925	0.0553223	1.73891	2.39943	1.99834	0	0	0	0	0	0	1	1
4113	222.041	6.79452	Positive	NA	Unknown	22.8809	22.4783	22.6824	22.109	20.6949	20.2937	19.7614	16.3732	21.7467	22.4829	22.0418	20.7234	20.1945	18.217	15.6858	6.97517	1.13423	-0.00459525	0.640586	1.38566	0.500408	2.0767	4.07558	9.39799	0.409563	0.00121706	0.203743	0.530999	0.153148	0.920865	2.4356	7.48563	0	0	0	0	0	0	1	1
4114	146.059	9.74921	Positive	NA	Unknown	19.1669	19.4413	19.6712	20.4774	20.5443	19.587	20.389	23.8672	20.6381	21.4705	21.9923	22.083	21.6386	21.6102	21.9498	21.4569	-1.47125	-2.02912	-2.32115	-1.60553	-1.09425	-2.02313	-1.5608	2.41037	1.9126	3.04897	3.6889	2.17249	1.24483	3.03608	2.0848	3.88821	0	1	1	1	0	1	1	1
4115	205.07	1.15225	Positive	NA	Unknown	23.299	23.3066	23.099	23.03	22.7038	21.5454	22.5831	18.9142	22.7097	23.221	24.085	23.9442	23.1349	21.7751	20.9817	19.4221	0.58932	0.0856009	-0.986	-0.91421	-0.431147	-0.229642	1.60141	-0.507896	0.559665	0.0589748	1.13832	1.02237	0.373554	0.174903	2.29994	0.460559	0	0	0	0	0	0	1	0
4118	121.064	8.84616	Positive	NA	Unknown	21.0451	21.791	21.6334	21.3041	20.6541	20.1858	18.1386	14.2575	21.5843	22.2778	22.6285	22.1155	20.5596	18.8623	18.0127	13.9405	-0.539172	-0.486723	-0.995114	-0.81141	0.0945496	1.32348	0.125859	0.316945	0.64871	0.565624	1.53713	1.14545	0.0812134	2.32901	0.111053	0.326164	0	0	0	0	0	1	0	0
4121	349.109	1.10884	Positive	NA	Unknown	23.5047	23.3782	23.2883	21.7862	21.0412	20.8968	20.5746	18.4644	23.2692	22.7406	21.3161	21.2971	20.5846	20.2278	20.0803	18.7497	0.235482	0.637646	1.97225	0.489092	0.456592	0.668985	0.494329	-0.285269	0.148839	0.498931	2.44575	0.355268	0.32608	0.531375	0.360046	0.185522	0	0	1	0	0	0	0	0
4125	215.052	1.14101	Positive	NA	Unknown	22.3295	21.9883	22.6714	22.6697	22.389	21.9953	21.9767	23.328	22.0563	21.6762	22.0107	22.3801	22.0947	21.6026	21.5702	20.9906	0.273184	0.312103	0.660779	0.289673	0.294356	0.392723	0.406515	2.33739	0.753035	0.905749	2.67249	0.816424	0.834779	1.25495	1.31887	12.4897	0	0	0	0	0	0	0	1
4126	321.107	7.91202	Positive	NA	Unknown	22.2783	22.9008	23.4933	21.361	19.447	18.1393	17.4864	15.1515	21.636	21.8297	23.4565	21.9983	20.3862	18.5392	17.4435	7.4971	0.642377	1.07112	0.0367814	-0.637277	-0.939236	-0.399927	0.042936	7.65442	0.180339	0.332831	0.00882487	0.178682	0.283125	0.105629	0.0103188	5.0659	0	0	0	0	0	0	0	1
4129	240.143	1.03999	Positive	NA	Unknown	21.4914	21.5816	21.3878	21.3816	21.0999	19.4471	18.4437	12.7541	20.5148	20.7973	21.0398	21.8293	21.4971	19.2119	16.626	12.3159	0.976528	0.784229	0.347945	-0.447672	-0.397171	0.23517	1.8177	0.438151	1.02757	0.756702	0.265418	0.362096	0.311971	0.167302	2.52532	0.352463	0	0	0	0	0	0	1	0
4130	407.114	2.76611	Positive	NA	Unknown	22.0008	22.5391	22.6814	22.233	21.7231	20.8609	19.5058	16.4038	23.4143	23.5272	22.8395	22.6028	21.5658	20.0633	17.3612	16.5527	-1.4135	-0.988174	-0.158086	-0.369781	0.157291	0.797591	2.14458	-0.148904	1.33384	0.803787	0.0871492	0.228073	0.0866729	0.600538	2.44601	0.0816721	0	0	0	0	0	0	1	0
4133	230.989	0.964942	Positive	NA	Unknown	24.4698	25.1371	25.2777	24.2836	23.5162	21.9462	18.4477	6.60583e-15	21.9393	22.0176	21.9719	21.5116	21.6622	19.7157	16.5836	-1.85962e-14	2.53042	3.11946	3.30578	2.77197	1.854	2.23048	1.86413	2.52021e-14	4.26298	5.62956	6.06068	4.82226	2.74857	3.57809	2.77025	0	1	1	1	1	1	1	1	0
4134	157.083	4.49666	Positive	NA	Unknown	24.8104	26.1787	23.11	24.6247	24.6089	23.822	24.078	20.6024	22.2987	22.9543	20.704	22.9373	21.5769	22.3998	22.2905	21.0423	2.51177	3.22443	2.40602	1.68744	3.03199	1.42215	1.78756	-0.439913	2.32398	3.33019	2.18286	1.30324	3.05054	1.02079	1.41633	0.222836	1	1	1	0	1	0	0	0
4135	219.064	6.8254	Positive	NA	Unknown	17.4455	18.752	18.4564	18.0531	18.2576	17.4092	16.6685	15.177	21.5283	22.0998	21.7786	21.0655	19.8729	17.3518	14.9253	13.5324	-4.0828	-3.3478	-3.3222	-3.01237	-1.61535	0.0573721	1.74326	1.64458	4.81608	3.66915	3.62987	3.1601	1.28005	0.0252954	1.42887	1.31353	1	1	1	1	0	0	0	0
4140	385.042	6.52535	Positive	NA	Unknown	22.8812	22.533	23.0087	22.6499	22.2275	21.8126	20.5038	15.0303	22.0693	21.7891	21.9047	21.5745	21.1998	18.7831	17.1928	3.3946	0.811897	0.743866	1.10398	1.07544	1.02773	3.02951	3.31097	11.6357	0.281624	0.253318	0.413151	0.399582	0.377252	1.66073	1.89034	9.84147	0	0	0	0	0	0	0	1
4145	117.018	1.80182	Positive	NA	Unknown	20.6602	22.8524	22.2055	23.4471	24.0261	22.8925	19.8053	18.7185	18.9692	20.5794	21.778	23.5021	23.2679	23.0506	20.931	22.8556	1.69094	2.27299	0.427516	-0.0549535	0.75817	-0.158107	-1.12577	-4.13705	0.852508	1.29646	0.151901	0.0172205	0.298616	0.0513493	0.492444	3.09119	0	0	0	0	0	0	0	1
4149	206.101	0.90245	Positive	NA	Unknown	20.6483	21.3782	21.7594	22.2971	21.4871	20.255	21.9291	21.4358	20.9381	21.8062	22.3944	23.7485	22.3486	22.3045	21.264	20.3196	-0.289767	-0.427999	-0.634945	-1.45141	-0.861508	-2.04946	0.665123	1.11623	0.190105	0.303048	0.499644	1.57672	0.752206	2.60593	0.531058	1.08047	0	0	0	0	0	1	0	0
4152	275.089	8.77449	Positive	NA	Unknown	19.3208	19.1415	19.6304	19.762	20.509	18.8418	17.098	16.0895	23.1029	20.9597	21.7126	20.9786	20.0603	19.4784	16.8168	12.6837	-3.78203	-1.81821	-2.08227	-1.21664	0.448694	-0.636594	0.281229	3.40576	4.32637	1.51241	1.84245	0.853224	0.23594	0.361988	0.137328	3.74318	1	0	0	0	0	0	0	1
4153	270.117	0.864001	Positive	NA	Unknown	23.1013	23.6978	21.9177	23.867	22.2097	21.3981	20.7308	18.5561	23.3166	23.4707	24.5472	24.7957	22.7464	22.0094	20.0294	17.5597	-0.215298	0.227096	-2.62956	-0.928653	-0.536705	-0.61129	0.701347	0.996487	0.104572	0.110918	2.67416	0.608471	0.301175	0.353927	0.421222	0.669111	0	0	1	0	0	0	0	0
4154	171.026	2.1649	Positive	NA	Unknown	25.0401	25.2329	24.4972	23.4689	22.826	21.5377	19.0343	20.9649	22.2286	22.5812	22.7052	23.0676	22.593	20.2762	19.7854	20.1237	2.81147	2.65171	1.79201	0.401204	0.232947	1.26146	-0.751048	0.841169	8.50411	7.96101	4.89428	0.589681	0.294301	3.00614	1.41547	1.66861	1	1	1	0	0	1	0	0
4155	171.026	1.51793	Positive	NA	Unknown	24.7632	24.4383	24.1557	23.122	22.6119	22.135	19.5965	19.4836	22.6276	22.7278	22.1048	22.1117	21.5965	20.5456	18.9815	19.0812	2.13562	1.71043	2.0509	1.01032	1.01541	1.58941	0.614956	0.402387	7.47828	5.69392	7.12874	2.75926	2.77934	5.1768	1.34082	0.737486	1	1	1	1	1	1	0	0
4156	293.032	0.963693	Positive	NA	Unknown	21.4192	22.4602	22.1696	22.2064	22.188	21.3557	17.2386	-9.76996e-15	20.7455	21.1396	21.3806	21.561	21.4382	19.3544	10.6834	-4.84057e-14	0.673665	1.3206	0.789026	0.645384	0.749816	2.00126	6.55522	3.86358e-14	0.132766	0.291806	0.15882	0.126529	0.149854	0.493439	2.62537	0	0	0	0	0	0	0	1	0
4158	268.116	6.42096	Positive	NA	Unknown	9.47079	14.1172	19.273	17.8506	18.5232	17.4178	14.1454	12.5728	16.0645	23.2239	23.6158	20.8088	20.1124	19.734	18.6437	13.4635	-6.59371	-9.10667	-4.34283	-2.95814	-1.58915	-2.31618	-4.49829	-0.890689	2.7952	4.40196	1.52264	0.880323	0.384964	0.629496	1.60247	0.190749	1	1	0	0	0	0	0	0
4162	107.049	2.25048	Positive	NA	Unknown	24.0681	23.7405	23.5065	22.1835	21.793	21.1618	18.8793	13.5112	23.4515	23.1448	22.6402	21.0391	19.9151	17.5558	15.6722	15.0921	0.61661	0.595624	0.866253	1.14438	1.87787	3.606	3.20702	-1.58084	0.720195	0.687002	1.15889	1.73323	3.54564	8.1966	7.15343	2.77333	0	0	0	0	1	1	1	1
4170	476.275	12.5152	Positive	NA	Unknown	16.6608	14.1238	15.2633	16.4641	8.051	15.652	8.00747	3.83121	21.6937	25.2003	24.6957	22.5801	20.5892	20.6772	15.1047	6.88183	-5.03285	-11.0766	-9.4324	-6.11591	-12.5382	-5.02527	-7.09724	-3.05062	0.940357	2.93711	2.32778	1.24041	3.50406	0.938369	1.53792	0.477496	0	1	1	0	1	0	0	0
4173	227.089	4.44744	Positive	NA	Unknown	24.3409	24.5948	23.3541	21.0608	18.5925	15.7128	16.2953	16.9339	23.9528	24.3061	22.997	20.5731	17.7377	17.9483	16.8553	16.547	0.388095	0.288727	0.357117	0.487656	0.854849	-2.23549	-0.560052	0.386911	0.351417	0.244668	0.316876	0.470161	1.00722	4.01397	0.56387	0.350075	0	0	0	0	0	1	0	0
4175	195.064	9.22586	Positive	NA	Unknown	20.064	19.6826	19.4752	20.8166	20.7935	19.974	22.8799	18.8095	22.8438	25.1805	23.1099	22.1647	21.5177	20.0042	17.2433	16.2025	-2.77972	-5.49793	-3.63472	-1.34802	-0.724146	-0.0302179	5.63658	2.60699	3.64696	8.66347	5.25088	1.28135	0.54207	0.0158128	8.90337	3.33135	1	1	1	0	0	0	1	1
4178	254.137	6.8381	Positive	NA	Unknown	20.0201	20.8394	20.4397	18.6562	18.889	18.5234	16.9527	16.2494	21.7869	22.2448	22.5323	21.5593	20.4509	18.6593	16.4172	14.4341	-1.76677	-1.40537	-2.09262	-2.90308	-1.56186	-0.135939	0.53552	1.81525	2.16004	1.54745	2.76176	4.37879	1.80453	0.083215	0.411086	2.24697	1	0	1	1	0	0	0	1
4179	123.518	1.52052	Positive	NA	Unknown	24.3576	23.9548	23.906	23.0307	22.647	22.3257	20.2412	19.9198	22.7461	22.8691	22.4545	22.2438	21.8562	21.0464	19.6535	20.0452	1.61149	1.08573	1.4515	0.786894	0.790771	1.27926	0.587695	-0.125434	7.23799	4.36631	6.37589	2.77513	2.79487	5.43172	1.8151	0.230437	1	1	1	0	0	1	0	0
4180	348.127	7.06962	Positive	NA	Unknown	20.5604	21.024	20.7856	20.6054	20.6537	19.7159	18.3254	15.2412	20.7415	21.3856	21.8552	21.7943	20.9266	19.2927	17.3084	10.6227	-0.181089	-0.361675	-1.06962	-1.18889	-0.272873	0.423204	1.01691	4.61854	0.197462	0.462	2.10235	2.45218	0.323333	0.567768	1.95294	12.8828	0	0	1	1	0	0	0	1
4181	215.015	1.14086	Positive	NA	Unknown	27.232	27.7923	26.5928	23.4917	23.1762	23.2848	20.1257	15.9938	23.6446	22.0457	23.9753	21.603	21.8177	21.1826	18.0736	16.1658	3.5874	5.74657	2.61745	1.88865	1.35854	2.10211	2.05208	-0.171925	2.99366	5.70393	1.89451	1.18083	0.743846	1.37745	1.33037	0.0637408	1	1	0	0	0	0	0	0
4182	347.093	1.02727	Positive	NA	Unknown	23.4998	23.5514	23.898	23.6736	24.4414	23.9843	25.0179	21.5031	21.6526	21.8606	23.8156	23.7263	24.3488	23.8751	24.024	21.1028	1.8472	1.69081	0.0824635	-0.0527232	0.0926358	0.109205	0.993936	0.400348	2.92131	2.57114	0.0580477	0.0363044	0.0656969	0.0783901	1.18892	0.350061	1	1	0	0	0	0	0	0
4183	226.127	1.04251	Positive	NA	Unknown	23.0627	23.2879	23.4569	22.8688	21.3412	20.1437	19.9686	15.3618	23.0657	22.9462	22.7604	22.4388	21.5512	19.3974	18.273	15.3809	-0.00297057	0.341755	0.696537	0.429929	-0.209955	0.746289	1.69563	-0.01915	0.00193971	0.282449	0.707232	0.375441	0.15903	0.777377	2.52408	0.0126565	0	0	0	0	0	0	1	0
4184	208.096	8.78671	Positive	NA	Unknown	18.3748	18.8783	19.7904	19.4465	19.5167	19.0479	18.2609	18.0705	19.426	22.1285	22.0997	20.8811	20.3738	19.7655	20.0717	18.1784	-1.05115	-3.25021	-2.3093	-1.43453	-0.857133	-0.717566	-1.81077	-0.107969	1.0449	5.21083	3.25979	1.63462	0.785426	0.616687	2.29553	0.0661601	0	1	1	0	0	0	1	0
4187	205.194	14.5132	Positive	NA	Unknown	23.2898	21.2002	22.2376	22.5153	17.3506	20.2357	16.0443	12.0341	21.3932	20.6534	24.6286	20.9539	15.8252	15.5546	15.259	12.8107	1.89657	0.546742	-2.39104	1.56142	1.5254	4.68109	0.785274	-0.776655	0.773859	0.162918	1.07021	0.594398	0.57618	2.83149	0.249053	0.245778	0	0	0	0	0	1	0	0
4188	287.054	6.78036	Positive	NA	Unknown	24.1525	23.0634	22.8741	22.0418	20.5749	20.3444	19.468	16.376	21.5415	22.5931	21.9878	20.419	19.8031	17.7366	14.2769	10.4286	2.61096	0.470216	0.886288	1.62284	0.771809	2.60784	5.19107	5.94738	3.70631	0.342469	0.7872	1.86785	0.651742	3.7001	8.82414	10.1896	1	0	0	0	0	1	1	1
4189	167.069	7.02813	Positive	NA	Unknown	18.8036	19.4232	19.5508	20.6984	20.8127	19.9325	18.6051	16.6829	18.276	19.7614	20.1404	21.2218	22.277	22.5578	19.3401	17.4495	0.527659	-0.338111	-0.589643	-0.52339	-1.46436	-2.6253	-0.735062	-0.766558	0.337017	0.197073	0.387473	0.333627	1.33564	3.11581	0.514913	0.544178	0	0	0	0	0	1	0	0
4190	157.012	2.65985	Positive	NA	Unknown	22.9785	23.1657	23.6622	22.7888	22.5358	22.5683	23.7378	21.8566	22.3705	23.0281	23.5949	23.4105	22.9939	22.3979	21.2453	19.4332	0.607956	0.137592	0.0672524	-0.621622	-0.458138	0.170452	2.49247	2.4234	0.900312	0.140048	0.0639647	0.928784	0.610987	0.178894	6.5206	6.29783	0	0	0	0	0	0	1	1
4191	163.074	7.55254	Positive	NA	Unknown	20.6542	19.3663	16.5239	16.7715	16.0559	16.8541	17.5023	16.6642	23.2968	20.9465	17.8342	17.7794	17.2896	17.3728	15.3311	14.7777	-2.64266	-1.58016	-1.31023	-1.00782	-1.23364	-0.518673	2.17123	1.88654	3.848	1.83587	1.39826	0.961238	1.2819	0.39477	2.91306	2.37709	1	0	0	0	0	0	1	1
4192	209.153	9.03704	Positive	NA	Unknown	23.7213	23.9665	24.1658	23.6094	23.2105	23.2162	22.3593	19.941	22.4675	22.6425	23.2408	23.4895	22.9776	22.2479	19.8604	17.2064	1.25382	1.32399	0.924999	0.119879	0.23291	0.968329	2.49885	2.73463	1.52464	1.65026	0.985885	0.0812709	0.170262	1.05183	4.11114	4.6482	0	0	0	0	0	0	1	1
4193	541.139	0.863582	Positive	NA	Unknown	21.9101	22.043	21.7424	21.9281	22.0827	22.0802	18.052	2.24265e-14	20.7991	21.6536	21.0264	21.447	21.5268	21.9384	11.5284	3.17524e-14	1.11103	0.389484	0.716005	0.481114	0.555892	0.141807	6.52355	-9.32587e-15	0.20412	0.0636231	0.123492	0.0798137	0.0933778	0.0222017	2.17205	0	0	0	0	0	0	0	1	0
4194	163.038	7.84592	Positive	NA	Unknown	21.6579	20.967	24.3126	23.6108	22.7937	21.9933	21.5135	18.5187	22.8995	22.1863	21.7396	21.5207	20.8397	18.8065	17.593	14.0112	-1.24158	-1.21937	2.57297	2.09005	1.95401	3.18683	3.92045	4.50744	2.15896	2.10288	5.93997	4.52279	4.12581	7.70091	9.67921	11.145	1	1	1	1	1	1	1	1
4197	190.535	6.52482	Positive	NA	Unknown	22.1483	21.9335	22.2289	22.1274	21.7987	21.396	20.1997	13.6045	21.6376	21.5056	21.5493	21.4105	20.9447	18.5557	16.5911	3.50834	0.510618	0.427864	0.679584	0.71683	0.853958	2.84025	3.60864	10.0961	0.15542	0.127267	0.21656	0.230702	0.284856	1.42454	2.01845	8.06323	0	0	0	0	0	0	1	1
4198	177.054	8.36462	Positive	NA	Unknown	19.058	19.5125	18.9134	20.7004	20.7502	20.3109	19.4428	17.2216	23.6604	23.5172	23.0478	22.4894	21.342	19.7424	16.8916	16.2842	-4.60237	-4.00465	-4.13433	-1.78898	-0.591854	0.568553	2.55121	0.937409	8.67651	7.4043	7.68514	2.50869	0.52617	0.499153	4.15211	0.9856	1	1	1	1	0	0	1	0
4200	355.098	7.02459	Positive	NA	Unknown	19.4258	20.3687	21.4851	22.1656	21.918	21.4782	19.8608	18.0669	18.888	19.9042	20.6651	21.8725	21.7739	21.5896	21.8801	17.0183	0.537784	0.464544	0.820034	0.293054	0.14408	-0.111336	-2.01937	1.04868	0.49773	0.411941	0.880562	0.233463	0.103754	0.0783378	3.22516	1.24774	0	0	0	0	0	0	1	0
4201	370.081	0.885636	Positive	NA	Unknown	21.349	21.8195	21.7117	21.6178	22.0641	22.0777	19.7892	5.30687e-14	21.4935	21.6093	21.4967	21.259	21.7732	22.0934	13.066	2.73115e-14	-0.144475	0.210215	0.21497	0.35877	0.290856	-0.0156662	6.72313	2.57572e-14	0.0211606	0.0311189	0.0318473	0.0543919	0.0436194	0.00224672	2.06275	0	0	0	0	0	0	0	1	0
4204	155.033	6.89987	Positive	NA	Unknown	25.623	25.5323	25.0246	25.8596	25.5869	25.1905	25.3564	25.3976	19.5614	19.9113	20.8965	21.7851	22.3376	19.8363	19.6762	17.6565	6.06154	5.62095	4.1281	4.0745	3.24924	5.35413	5.68022	7.74107	9.44037	8.70083	6.04056	5.9417	4.41237	8.24185	8.80168	12.0429	1	1	1	1	1	1	1	1
4205	147.03	0.673497	Positive	NA	Unknown	18.9626	18.3514	17.7594	18.0172	20.4302	21.4106	20.9754	18.4671	18.6084	19.186	20.2199	19.9738	20.5178	19.1224	20.0784	18.9807	0.354158	-0.834648	-2.46045	-1.95656	-0.0875744	2.28819	0.896951	-0.513654	0.159211	0.44979	2.03023	1.45428	0.0351903	1.82623	0.493872	0.245978	0	0	1	0	0	0	0	0
4206	230.056	8.32927	Positive	NA	Unknown	22.7367	22.8544	22.9103	21.7453	20.349	18.8884	16.0055	2.84217e-14	22.5377	22.0601	21.3988	19.8555	17.4809	7.96843	7.5086	7.69186	0.19897	0.794277	1.51156	1.88982	2.86811	10.92	8.49689	-7.69186	0.0289769	0.12687	0.267931	0.352731	0.605467	4.0481	2.83927	2.45851	0	0	0	0	0	1	1	1
4207	167.081	6.35642	Positive	NA	Unknown	18.3536	18.4226	19.1888	21.691	21.7091	16.5058	15.2019	16.9938	19.1113	20.4287	21.1863	23.8274	22.5901	20.3836	18.3165	15.0995	-0.757746	-2.0061	-1.9975	-2.13639	-0.881043	-3.87778	-3.1146	1.89421	0.241833	0.849369	0.844313	0.927389	0.290195	2.18994	1.59104	0.784478	0	0	0	0	0	1	0	0
4208	121.52	1.87014	Positive	NA	Unknown	20.7172	23.0046	21.0014	23.8216	23.5515	23.3655	23.2521	22.4194	20.8663	23.8793	23.6709	24.0506	23.473	23.4233	22.8274	22.586	-0.149093	-0.874621	-2.66948	-0.229068	0.078487	-0.0578123	0.424704	-0.166635	0.0566302	0.43201	2.04045	0.0897936	0.0289791	0.0211674	0.179356	0.0637357	0	0	1	0	0	0	0	0
4210	146.044	1.007	Positive	NA	Unknown	21.8889	21.619	21.7346	21.4059	21.5321	21.4271	20.7656	21.0398	21.8857	21.7044	21.4509	22.2454	21.7859	21.0909	21.3549	22.154	0.00311421	-0.0854181	0.283757	-0.83941	-0.253801	0.336181	-0.589265	-1.11419	0.00412372	0.127564	0.545377	2.52919	0.471191	0.684533	1.51079	3.78865	0	0	0	0	0	0	0	1
4213	404.153	8.85975	Positive	NA	Unknown	20.3054	21.2662	21.1549	20.7755	20.0179	19.4097	16.4554	7.81319e-15	21.0777	21.7351	22.1331	21.522	20.0542	17.895	16.3687	7.38992e-14	-0.772326	-0.468929	-0.978153	-0.746497	-0.0363288	1.51468	0.0866924	-6.6086e-14	1.11019	0.558316	1.5602	1.05778	0.0304989	2.94585	0.0761759	0	0	0	0	0	0	1	0	0
4214	159.014	1.06382	Positive	NA	Unknown	22.3573	22.4868	22.577	22.289	22.2861	22.1191	20.1956	17.2788	21.1484	21.2014	21.0882	21.59	21.7929	21.7499	20.5325	19.1003	1.20885	1.28537	1.48884	0.698985	0.493214	0.369206	-0.336851	-1.82145	2.44632	2.67391	3.30122	1.10572	0.680467	0.463386	0.411816	4.37192	1	1	1	0	0	0	0	1
4215	139.038	6.50595	Positive	NA	Unknown	24.5322	24.2269	24.641	23.8394	23.4306	22.1291	21.0801	19.4422	21.6557	21.5321	21.758	22.0177	22.1996	21.1234	19.2964	17.8597	2.87645	2.69481	2.88308	1.82178	1.23102	1.00572	1.78373	1.58251	4.8668	4.45806	4.88174	2.56555	1.45006	1.08467	2.48821	2.09035	1	1	1	1	0	0	1	1
4225	205.042	9.18816	Positive	NA	Unknown	18.2261	21.2404	21.66	20.0696	16.9393	18.4698	15.8433	-2.28706e-14	18.5863	21.5494	22.7113	21.9934	20.2777	19.4002	18.4126	5.10703e-15	-0.36023	-0.309071	-1.05124	-1.92375	-3.33842	-0.930476	-2.56936	-2.79776e-14	0.227717	0.190174	0.906853	2.16509	4.72431	0.765585	3.28787	0	0	0	0	1	1	0	1	0
4226	261.11	1.45464	Positive	NA	Unknown	20.7671	23.3015	20.098	21.714	22.7277	22.1592	22.8544	11.7571	17.909	21.1459	9.93448	21.3855	19.9485	21.8039	21.6609	12.0036	2.85806	2.1556	10.1635	0.328476	2.77928	0.355235	1.19347	-0.246511	0.597659	0.413357	3.63159	0.0485134	0.575782	0.0526858	0.200743	0.0359414	0	0	1	0	0	0	0	0
4230	304.137	8.84338	Positive	NA	Unknown	21.8674	20.8941	20.5936	19.6229	18.5309	18.531	16.7311	7.14021	22.5876	21.8694	21.4895	20.7327	18.5587	14.9274	11.1181	7.02595	-0.720159	-0.975354	-0.895895	-1.10982	-0.0277751	3.60357	5.61302	0.114256	0.160632	0.228783	0.206919	0.267115	0.00535484	1.27482	2.42784	0.0224485	0	0	0	0	0	0	1	0
4231	206.101	1.75549	Positive	NA	Unknown	22.4718	22.6982	22.8215	21.9441	21.2147	20.9146	19.7654	17.5713	22.2717	22.4019	22.1598	22.3733	21.4271	19.3502	19.0113	16.9066	0.200144	0.296251	0.661657	-0.429212	-0.212438	1.5644	0.754115	0.664682	0.18792	0.300157	0.85918	0.479538	0.201467	2.96718	1.03242	0.864656	0	0	0	0	0	1	0	0
4244	202.535	7.42364	Positive	NA	Unknown	20.1995	19.6292	20.3324	21.2212	21.1929	21.0605	21.1678	13.6301	20.8762	20.7364	20.9569	20.3681	20.4342	17.6611	16.4872	3.39011	-0.676748	-1.1072	-0.624514	0.853098	0.758705	3.39937	4.6806	10.24	0.221024	0.40439	0.201071	0.292054	0.253329	1.90873	3.0357	8.39352	0	0	0	0	0	0	1	1
4252	305.064	7.41249	Positive	NA	Unknown	26.4416	27.0994	24.7029	24.4016	24.5826	26.2591	23.1381	17.0564	22.7273	21.3101	21.3278	21.1314	21.1763	19.2777	16.8003	15.3103	3.71434	5.78924	3.37518	3.27022	3.40625	6.98139	6.33788	1.74614	3.8125	6.82093	3.33205	3.18567	3.37562	8.48077	7.59589	1.28259	1	1	1	1	1	1	1	0
4256	105.07	7.27781	Positive	NA	Unknown	20.2547	19.9052	21.8335	20.3776	20.8201	21.198	19.1408	18.4492	19.4017	22.5253	22.6566	19.8959	19.5253	19.358	18.5456	16.3842	0.853021	-2.62015	-0.82318	0.481725	1.29476	1.83999	0.595234	2.06496	0.718289	3.57875	0.684279	0.34064	1.29129	2.15211	0.44546	2.54527	0	1	0	0	0	1	0	1
4263	123.011	0.996205	Positive	NA	Unknown	20.6842	20.9683	21.1126	20.1416	20.775	19.8931	18.1359	18.7505	21.5836	21.752	21.6073	21.1741	20.7406	19.2567	19.5952	18.8765	-0.89939	-0.783699	-0.494625	-1.03244	0.0343838	0.636398	-1.45931	-0.126025	2.65695	2.17518	1.11658	3.239	0.0459867	1.60574	5.20919	0.191085	0	0	0	1	0	0	1	0
4265	212.127	7.37479	Positive	NA	Unknown	17.4934	19.3366	20.3107	21.3264	18.429	18.5924	15.8172	19.7936	18.7775	20.8671	22.312	21.6457	20.0622	20.4678	18.9852	18.4123	-1.28405	-1.53056	-2.00128	-0.319212	-1.63322	-1.8754	-3.16802	1.38125	0.891058	1.142	1.68208	0.154495	1.25328	1.53044	3.27314	0.987179	0	0	0	0	0	0	1	0
4267	223.048	7.43007	Positive	NA	Unknown	20.4817	20.4	20.5609	21.4495	21.3788	21.2859	21.2303	12.8778	20.9304	20.6206	20.9001	20.1529	20.2949	16.8239	15.9495	-2.19824e-14	-0.448751	-0.220638	-0.339213	1.2966	1.08394	4.46202	5.28078	12.8778	0.37745	0.161045	0.267073	1.61403	1.2456	8.56418	10.245	21.0135	0	0	0	0	0	1	1	1
4271	224.075	1.15106	Positive	NA	Unknown	22.6799	22.8867	23.0687	22.4653	21.5891	21.0334	19.345	18.6147	20.6143	20.4775	20.8025	21.0424	20.9828	19.2493	17.9081	15.8631	2.06559	2.40921	2.26616	1.42294	0.606271	1.78403	1.43689	2.75155	4.52742	5.54924	5.12366	2.68027	0.787084	3.6999	2.71831	6.56006	1	1	1	1	0	1	1	1
4273	193.033	1.89164	Positive	C6H8O7	CITRATE	24.0099	23.6558	24.5092	24.4315	24.3325	25.1399	23.0818	18.7055	21.4514	20.8549	21.1509	22.1671	22.4322	21.0158	20.8244	18.2662	2.5585	2.80092	3.35827	2.26436	1.90029	4.12414	2.25743	0.43928	6.63729	7.39893	9.08098	5.69589	4.52058	11.2096	5.67355	0.56871	1	1	1	1	1	1	1	0
4276	147.043	7.53058	Positive	NA	Unknown	22.1079	21.213	20.1744	18.5799	17.5322	19.0215	19.1638	18.4909	23.2752	21.5441	19.5698	19.5741	18.7051	17.5367	15.7945	16.8185	-1.16723	-0.331094	0.604681	-0.994176	-1.17296	1.4848	3.36926	1.67241	0.95263	0.190015	0.394868	0.762083	0.959216	1.34254	4.35409	1.59515	0	0	0	0	0	0	1	0
4278	206.994	1.45235	Positive	NA	Unknown	22.127	23.398	21.1893	22.3461	22.733	22.4115	22.5229	17.4065	20.0674	21.4513	17.9656	21.9721	20.9114	22.1971	21.7246	17.4345	2.05962	1.94673	3.22371	0.373995	1.82158	0.214396	0.798226	-0.0280462	1.22875	1.13353	2.35563	0.139915	1.03137	0.075812	0.343322	0.00926191	0	0	1	0	0	0	0	0
4280	595.142	7.18546	Positive	NA	Unknown	24.8567	24.5349	24.9258	23.2197	23.0437	23.1979	20.9259	12.9556	22.2049	20.8474	20.2141	17.9327	18.9503	16.0974	15.5672	-4.50751e-14	2.6518	3.68754	4.71176	5.28701	4.09343	7.10051	5.35872	12.9556	2.13974	3.44165	4.82346	5.60989	3.98318	8.02762	5.70773	14.479	1	1	1	1	1	1	1	1
4284	150.049	6.6271	Positive	NA	Unknown	17.9148	17.8758	17.1808	18.85	18.9323	16.8455	19.4652	18.6174	20.5499	21.6268	20.9075	20.6021	20.5117	19.2006	19.0613	17.4297	-2.63508	-3.75099	-3.72674	-1.75218	-1.57939	-2.35507	0.403867	1.18771	4.85309	7.55668	7.4996	2.74435	2.36092	4.16825	0.358124	1.5585	1	1	1	1	1	1	0	0
4286	241.067	2.55428	Positive	NA	Unknown	16.0814	18.6678	16.7157	20.6725	22.2251	22.3917	22.4017	22.4493	15.2379	18.5415	20.5466	22.2137	22.5245	23.012	22.893	23.242	0.843456	0.12627	-3.83081	-1.54124	-0.299405	-0.620276	-0.491367	-0.792773	0.329305	0.0394222	2.66071	0.722449	0.0989808	0.226767	0.17267	0.305026	0	0	1	0	0	0	0	0
4289	311.219	10.2556	Positive	NA	Unknown	15.1937	17.9894	18.8828	17.3881	18.0215	19.1177	21.4338	19.9094	22.5282	21.5551	21.0677	18.3273	17.4448	17.1539	19.1781	14.8338	-7.33454	-3.56577	-2.18496	-0.93922	0.576671	1.96384	2.25563	5.07561	9.59671	3.94171	1.95131	0.592336	0.31655	1.67019	2.04407	6.28394	1	1	0	0	0	0	1	1
4290	294.095	8.26015	Positive	NA	Unknown	23.3384	23.6613	22.3407	19.2087	17.9994	17.8278	16.6574	10.7692	23.0132	21.006	19.9115	19.4417	17.6766	15.8781	11.9089	3.40719	0.325198	2.65529	2.42922	-0.23298	0.322786	1.94979	4.7485	7.36196	0.0926528	1.26899	1.1172	0.0646581	0.0919029	0.820115	2.9506	5.39767	0	0	0	0	0	0	1	1
4296	305.064	7.96044	Positive	NA	Unknown	28.3801	28.5928	26.1829	26.5759	27.3759	27.9072	25.6057	21.3988	19.6803	20.0151	20.6257	21.316	22.1504	20.0659	17.6758	16.6183	8.69983	8.57768	5.5572	5.25986	5.22548	7.84125	7.92992	4.7805	6.58925	6.47569	3.64175	3.37005	3.33886	5.78608	5.86949	2.94048	1	1	1	1	1	1	1	1
4300	197.02	1.02118	Positive	NA	Unknown	20.4709	21.0184	20.9778	21.2283	21.5653	21.2405	20.2501	15.4633	20.177	20.8398	20.9326	21.2072	21.3652	20.7496	18.8725	14.3226	0.293927	0.178581	0.0451948	0.0211339	0.2001	0.490896	1.37764	1.14072	0.255484	0.142912	0.032668	0.014988	0.162684	0.48557	2.05947	1.56427	0	0	0	0	0	0	1	0
4302	211.168	9.88215	Positive	NA	Unknown	23.3098	23.2452	22.8641	21.7955	20.6102	19.9954	19.8303	17.288	22.3752	21.8451	21.0143	20.7604	20.0544	18.6772	16.6826	15.4844	0.934666	1.40019	1.84981	1.03514	0.55577	1.31816	3.1477	1.80366	1.18872	2.13678	3.19591	1.3768	0.578698	1.95663	6.51724	3.0827	0	1	1	0	0	0	1	1
4303	77.0385	6.30514	Positive	NA	Unknown	13.0661	13.2697	19.3995	15.0961	16.1807	17.891	14.2295	10.3808	18.211	23.5712	22.8516	18.5377	17.2876	17.5405	16.693	10.9493	-5.14496	-10.3015	-3.45202	-3.44161	-1.10683	0.350504	-2.46343	-0.568476	8.16522	15.7923	4.99321	4.97325	0.98606	0.222561	3.1323	0.402922	1	1	1	1	0	0	1	0
4304	240.506	0.950402	Positive	NA	Unknown	21.7651	22.0365	22.0727	21.3837	21.2405	20.7852	16.9957	-1.02141e-14	21.3178	20.8361	20.6068	19.798	20.6434	18.5598	13.8179	5.86198e-14	0.447248	1.20043	1.46591	1.58566	0.59717	2.22548	3.17778	-6.88338e-14	0.254917	0.920535	1.22222	1.36848	0.363746	2.24111	3.73535	0	0	0	0	0	0	1	1	0
4306	134.044	0.805078	Positive	C4H7NO4	ASPARTATE	22.9715	21.4959	22.7465	21.8498	22.0954	26.2028	25.7412	19.8813	23.3262	23.6003	21.0494	22.8344	23.1844	22.5254	23.192	20.0549	-0.354653	-2.10443	1.69708	-0.984617	-1.08894	3.67741	2.5492	-0.173618	0.137942	1.34352	0.988179	0.472231	0.538813	3.02127	1.7747	0.0631609	0	0	0	0	0	1	0	0
4307	183.173	9.82034	Positive	NA	Unknown	22.8191	22.8229	22.9183	22.5089	21.4615	20.4057	20.7862	16.8146	21.7405	22.3135	22.1677	22.1986	21.1885	19.5366	14.445	3.45957	1.07859	0.509412	0.750611	0.31026	0.273028	0.869139	6.34113	13.355	0.32782	0.135392	0.211525	0.0784263	0.0683581	0.251845	3.82186	9.61092	0	0	0	0	0	0	1	1
4310	229.105	7.20949	Positive	NA	Unknown	16.2965	18.8551	20.0515	21.7615	21.8691	19.4372	19.3315	18.3001	18.0961	19.5633	20.8017	22.5097	22.0878	18.7168	18.2381	15.1416	-1.79968	-0.708211	-0.750183	-0.748281	-0.218656	0.720385	1.09341	3.15849	1.74105	0.475634	0.512786	0.511081	0.116795	0.486306	0.853497	3.91191	0	0	0	0	0	0	0	1
4314	139.002	2.65289	Positive	NA	Unknown	22.4216	22.455	23.1338	22.1862	21.9498	21.9393	23.1188	21.3555	21.7828	22.5671	23.0025	22.9211	22.5213	21.7148	20.9059	18.9669	0.638714	-0.112179	0.131253	-0.734916	-0.571549	0.224551	2.21292	2.38854	0.972147	0.112117	0.133597	1.18654	0.832262	0.249099	5.65252	6.22642	0	0	0	0	0	0	1	1
4321	154.047	2.29478	Positive	C5H9NO3	N-ACETYL-L-ALANINE	19.9977	20.2887	19.8237	21.0834	20.8428	20.0684	17.7652	19.9898	21.7018	21.36	21.9579	22.9604	21.8644	21.3811	20.0534	19.4733	-1.70414	-1.07129	-2.13422	-1.87699	-1.02159	-1.31273	-2.28823	0.516487	2.15219	1.0988	2.98178	2.47707	1.02716	1.47167	3.29364	0.409725	1	0	1	1	0	0	1	0
4323	193.53	7.42206	Positive	NA	Unknown	18.529	18.4233	19.498	20.4645	20.3647	20.3887	20.9055	15.0359	20.778	20.745	20.8817	20.5248	20.5136	18.6794	17.7226	3.45569	-2.24897	-2.32167	-1.38369	-0.0603278	-0.148932	1.70929	3.18291	11.5803	0.93919	0.982189	0.486305	0.0151998	0.0384686	0.643635	1.54401	8.80473	0	0	0	0	0	0	0	1
4324	145.085	6.46656	Positive	NA	Unknown	21.7015	23.1206	25.3177	24.6301	22.4101	20.503	19.8393	19.9432	20.8353	22.0039	22.1576	21.4688	20.539	17.7805	16.8116	17.0549	0.866157	1.11668	3.16009	3.16127	1.87111	2.72257	3.0277	2.88829	0.856957	1.22751	5.37896	5.38156	2.59797	4.41105	5.08572	4.77702	0	0	1	1	1	1	1	1
4325	252.085	8.30275	Positive	NA	Unknown	21.5477	21.5343	21.493	20.4719	18.7958	17.1472	18.1367	21.0968	21.5964	21.7836	21.5949	20.6934	18.9441	17.442	17.4181	18.5437	-0.0487076	-0.249353	-0.101917	-0.221456	-0.148215	-0.294736	0.718523	2.55313	0.0237655	0.135113	0.0511635	0.11831	0.0762418	0.16338	0.483944	2.88976	0	0	0	0	0	0	0	1
4326	116.528	2.13915	Positive	NA	Unknown	22.0256	21.8021	21.93	21.134	20.3993	20.1359	20.3296	19.4668	22.3216	22.2059	22.1283	21.853	20.7917	19.9925	18.9017	18.8944	-0.295933	-0.403825	-0.198281	-0.718981	-0.392405	0.143356	1.42789	0.572357	0.391208	0.586208	0.23901	1.30822	0.564248	0.163543	3.53001	0.945443	0	0	0	0	0	0	1	0
4327	287.053	8.85942	Positive	NA	Unknown	21.3521	21.5858	20.0698	19.6956	20.6	21.0742	18.9285	15.5109	22.7771	21.3499	21.2878	20.2322	19.1694	17.6948	17.3681	7.65885	-1.42504	0.235862	-1.21794	-0.536629	1.4306	3.37941	1.56034	7.85208	0.412301	0.0528157	0.338215	0.12881	0.414356	1.34078	0.463332	4.49081	0	0	0	0	0	0	0	1
4330	158.08	6.59377	Positive	NA	Unknown	21.3153	22.0309	22.1406	21.0112	20.569	19.4927	18.5166	20.2872	22.2494	23.2136	23.438	23.1011	22.8302	20.8403	20.261	20.007	-0.934044	-1.18276	-1.29743	-2.08982	-2.26127	-1.34759	-1.74436	0.280251	1.22408	1.72281	1.97174	3.90929	4.3573	2.08394	3.02886	0.250164	0	0	0	1	1	1	1	0
4331	202.079	8.10456	Positive	NA	Unknown	18.1063	18.7916	19.7905	18.9277	17.5648	14.4147	16.9176	18.783	20.3893	21.5397	21.4005	20.5402	19.6755	17.3353	8.80946	14.8375	-2.28299	-2.74809	-1.60991	-1.61247	-2.11071	-2.92053	8.10811	3.9455	0.75443	0.976527	0.47301	0.47399	0.677796	1.06431	4.59364	1.64137	0	0	0	0	0	0	1	0
4334	484.158	8.01217	Positive	NA	Unknown	14.8612	16.7248	22.5829	20.1876	16.4013	12.2101	0	7.10543e-15	17.0037	22.347	22.4574	19.4958	18.7931	18.7949	18.8344	-1.06581e-14	-2.14242	-5.62225	0.125471	0.69184	-2.39182	-6.58478	-18.8344	1.77636e-14	1.34843	5.30822	0.0441039	0.296744	1.58167	6.48743	17.8252	0	0	1	0	0	0	1	1	0
4335	434.2	8.38216	Positive	NA	Unknown	12.9123	18.9414	19.3262	18.5376	18.2366	17.278	17.5594	12.8595	15.9103	21.0673	22.1318	21.2821	20.0663	18.8703	18.5302	-1.24345e-14	-2.99793	-2.12594	-2.80552	-2.74447	-1.82975	-1.59232	-0.970818	12.8595	4.79767	2.9736	4.38702	4.25723	2.39386	1.95493	0.958528	20.0257	1	1	1	1	1	0	0	1
4337	146.092	1.55234	Positive	C5H11N3O2	4-GUANIDINOBUTANOATE	22.6	23.1899	23.5753	22.1076	20.9483	22.7086	21.9233	20.6511	21.9091	22.2712	21.2136	20.7305	20.1419	19.8584	20.3217	20.2772	0.690879	0.918644	2.36176	1.37714	0.806407	2.85018	1.60159	0.373868	0.758782	1.13123	4.38685	2.03341	0.940651	5.62733	2.53324	0.339529	0	0	1	1	0	1	1	0
4342	408.257	9.86201	Positive	NA	Unknown	23.1662	23.089	22.5827	21.5499	20.3596	19.7419	19.6949	16.2774	22.2512	21.6479	20.7852	20.484	19.8391	18.3882	16.1862	12.9097	0.914978	1.44118	1.79744	1.06596	0.520499	1.35364	3.50871	3.36767	1.0109	1.94707	2.68496	1.25685	0.470028	1.77697	6.64628	6.31857	0	0	1	0	0	0	1	1
4347	594.349	8.47019	Positive	NA	Unknown	18.4013	20.54	17.9431	19.1403	14.863	6.18002	12.6191	3.5934	14.6892	22.0342	22.3716	19.6161	9.96781	16.0647	13.6992	-2.17604e-14	3.71209	-1.49423	-4.4285	-0.475797	4.89522	-9.88465	-1.0801	3.5934	0.521024	0.170581	0.659301	0.0487998	0.755793	2.06344	0.118155	0.499285	0	0	0	0	0	1	0	0
4349	160.075	6.75808	Positive	NA	Unknown	25.7207	25.028	24.9506	24.5235	21.4143	21.9957	22.6701	21.2054	26.1791	24.8595	24.679	23.6142	19.9165	20.1515	22.3534	19.5447	-0.458403	0.168589	0.271619	0.909377	1.49779	1.84412	0.316666	1.6607	0.334549	0.10436	0.178693	0.823251	1.67801	2.2726	0.213775	1.95065	0	0	0	0	0	1	0	0
4350	153.948	0.592063	Positive	NA	Unknown	21.1559	21.1603	21.0548	21.5551	21.5881	20.9061	20.8645	20.6977	20.4121	20.7044	20.5943	20.7784	20.3585	20.4416	20.6024	21.3808	0.743796	0.455864	0.46047	0.776708	1.22963	0.464474	0.262091	-0.683126	1.35152	0.679612	0.688958	1.43883	2.80635	0.697121	0.331134	1.19587	0	0	0	0	1	0	0	0
4352	289.069	8.76196	Positive	NA	Unknown	23.1638	22.7188	22.1633	22.1355	22.8063	22.1447	20.4518	17.5459	23.522	21.5932	20.857	20.5591	20.0716	17.2817	14.4712	11.6099	-0.358114	1.12562	1.30631	1.5764	2.73469	4.86305	5.98052	5.93606	0.209885	0.913607	1.12763	1.4778	3.28463	7.03803	8.91755	8.84523	0	0	0	0	1	1	1	1
4355	135.101	7.42563	Positive	NA	Unknown	22.1802	23.7281	21.8417	22.8653	22.5614	21.7513	21.6407	19.1308	19.2264	20.6289	19.9084	21.9761	20.854	20.7855	20.7431	18.3649	2.95385	3.09918	1.93334	0.889183	1.70738	0.965726	0.897607	0.76585	2.67247	2.86421	1.44234	0.492292	1.20581	0.548741	0.498396	0.406032	1	1	0	0	0	0	0	0
4356	155.033	9.25698	Positive	NA	Unknown	25.3166	28.0071	25.7194	24.9583	24.6533	24.1957	24.2225	23.786	19.3161	21.1723	21.436	20.8327	20.805	18.4702	17.1428	7.86046	6.00052	6.83477	4.28339	4.12552	3.84834	5.72547	7.07975	15.9255	2.02196	2.44411	1.23956	1.17461	1.06376	1.88817	2.57223	7.59858	1	1	0	0	0	0	1	1
4357	284.186	1.44376	Positive	NA	Unknown	20.3624	23.042	20.6254	21.7219	22.1439	21.7165	22.1641	10.0409	17.775	20.7071	9.83052	20.9429	19.8196	21.318	21.1792	8.73474	2.58738	2.33493	10.7949	0.778949	2.32434	0.398447	0.98483	1.30613	0.359135	0.316039	2.60195	0.0891912	0.314269	0.0436586	0.115425	0.158642	0	0	1	0	0	0	0	0
4359	111.027	1.04241	Positive	NA	Unknown	21.1347	21.4935	21.6385	20.1152	19.4191	18.9787	19.5584	16.3679	21.5545	21.9009	21.6567	20.3797	19.4308	18.053	17.7224	13.6353	-0.419812	-0.407436	-0.018165	-0.264512	-0.0117602	0.925721	1.83593	2.73253	0.337886	0.325552	0.0112864	0.193701	0.00727413	0.965019	2.59553	4.5445	0	0	0	0	0	0	1	1
4361	277.038	1.1451	Positive	NA	Unknown	20.3208	21.3376	20.5845	20.6392	19.6636	15.0394	11.7626	1.53211e-14	17.6862	20.9031	20.8093	21.0768	19.7326	13.6336	3.9164	-2.22045e-16	2.63459	0.434501	-0.224773	-0.437641	-0.0690034	1.40586	7.84618	1.55431e-14	0.736011	0.0840294	0.0417127	0.0846883	0.0124109	0.324578	3.51343	0	0	0	0	0	0	0	1	0
4362	146.117	6.42851	Positive	NA	Unknown	20.1372	19.3706	19.0807	19.8581	19.9594	21.161	22.5537	21.9055	21.7837	23.1064	22.989	21.5894	20.2741	19.2535	19.1066	20.8772	-1.64653	-3.73573	-3.90831	-1.73137	-0.314653	1.90748	3.44713	1.02828	4.35604	11.3966	11.8961	4.66268	0.428005	5.30152	10.5308	2.23046	1	1	1	1	0	1	1	1
4363	218.153	10.7008	Positive	NA	Unknown	21.7966	23.912	22.3136	20.0602	21.3415	21.3523	20.7506	20.1317	20.828	21.8167	21.3951	20.5577	20.5766	18.7282	12.371	19.0568	0.968603	2.09528	0.918471	-0.49748	0.764853	2.6242	8.3796	1.07484	0.167159	0.425478	0.157284	0.0796937	0.127872	0.570859	2.96812	0.188535	0	0	0	0	0	0	1	0
4364	97.0033	0.774793	Positive	NA	Unknown	20.8353	20.8563	21.0373	20.1655	18.5895	16.3598	18.1579	11.9027	21.0553	21.2738	20.4631	20.6687	18.2635	16.5222	15.1497	13.0635	-0.22006	-0.417505	0.574237	-0.50323	0.326034	-0.162366	3.0082	-1.16082	0.0979555	0.202133	0.296136	0.252297	0.151915	0.0704569	2.88733	0.737374	0	0	0	0	0	0	1	0
4366	275.089	8.51446	Positive	NA	Unknown	19.6783	18.7313	18.7736	19.6349	19.9613	18.9532	17.4151	14.522	22.7815	20.761	20.0851	19.8408	19.0447	17.9997	13.9671	12.7567	-3.10329	-2.02976	-1.31152	-0.205941	0.916563	0.953518	3.448	1.76525	3.72962	2.02533	1.07686	0.107302	0.65495	0.691008	4.31423	1.65228	1	1	0	0	0	0	1	0
4368	327.215	10.8276	Positive	NA	Unknown	12.4068	15.8435	18.5033	18.6876	21.1932	24.7905	26.8188	22.1268	17.3088	19.3458	21.6552	20.1908	20.5017	21.0296	22.1358	15.8708	-4.90196	-3.50231	-3.15191	-1.50323	0.6915	3.76089	4.68305	6.256	6.34204	4.07618	3.51883	1.20616	0.419432	4.49314	5.98946	8.45531	1	1	1	0	0	1	1	1
4369	233.549	6.78283	Positive	NA	Unknown	21.8189	21.4753	21.6373	21.2088	19.7639	19.4587	18.9275	15.7743	20.8288	21.4835	21.1059	19.8479	19.3195	17.4446	14.0229	7.14984e-14	0.990076	-0.00818655	0.531427	1.36093	0.444438	2.01406	4.9046	15.7743	1.78584	0.00726358	0.736821	2.83625	0.578737	4.89707	13.1781	28.2971	0	0	0	1	0	1	1	1
4372	280.138	1.09564	Positive	NA	Unknown	19.8386	20.6475	19.3411	20.4073	20.9924	19.8747	20.2475	15.8375	20.1359	20.0979	22.0344	22.6721	23.1532	22.0406	20.5405	19.3511	-0.297278	0.549646	-2.69328	-2.26474	-2.16084	-2.16596	-0.293054	-3.51356	0.094851	0.189508	1.52121	1.18477	1.10793	1.11167	0.0933789	2.24098	0	0	0	0	0	0	0	1
4373	116.042	0.791554	Positive	NA	Unknown	22.8209	23.2937	23.7601	22.87	20.8332	19.4442	20.7904	16.006	23.376	23.6531	23.125	22.8419	20.3529	19.1756	17.1018	15.1416	-0.555123	-0.359399	0.635085	0.0280901	0.480357	0.268549	3.6886	0.864321	0.529243	0.304355	0.633136	0.0188938	0.438373	0.214286	7.2854	0.96814	0	0	0	0	0	0	1	0
4377	228.121	6.53253	Positive	NA	Unknown	17.5745	18.0039	19.4665	19.8391	20.2921	18.6203	19.8701	21.9123	17.8308	18.4929	19.4903	21.4873	20.7652	21.4282	20.955	22.2184	-0.256244	-0.489026	-0.0238376	-1.64819	-0.47313	-2.80794	-1.08489	-0.30606	0.155533	0.335434	0.0126599	1.76104	0.321953	3.79461	0.965296	0.190883	0	0	0	0	0	1	0	0
4378	167.08	1.18121	Positive	NA	Unknown	13.9392	13.6436	13.614	17.4747	18.2093	17.2013	15.651	18.377	14.6325	16.5424	19.7773	20.9525	19.4839	19.3683	18.54	20.0661	-0.693285	-2.89881	-6.16328	-3.4778	-1.27464	-2.16696	-2.88905	-1.68905	0.269955	1.86342	5.39301	2.42979	0.585321	1.22217	1.85427	0.859174	0	0	1	1	0	0	0	0
4379	178.049	6.56512	Positive	NA	Unknown	19.0506	22.5622	22.2431	22.5211	22.4152	21.5956	20.888	20.3327	11.0186	17.8437	18.8221	20.6992	20.8995	18.373	17.8574	15.2563	8.03194	4.71846	3.42099	1.82197	1.51578	3.22263	3.03052	5.07641	2.51998	1.16448	0.741967	0.326173	0.260439	0.683887	0.629359	1.29329	1	0	0	0	0	0	0	0
4382	203.543	7.79999	Positive	NA	Unknown	16.8131	16.7104	19.2414	20.0063	19.5824	19.0851	19.4012	12.4349	20.6904	20.4113	20.6161	20.5981	20.2092	19.1962	16.8105	1.64313e-14	-3.87728	-3.70089	-1.37471	-0.591764	-0.626767	-0.111072	2.59071	12.4349	5.61005	5.28137	1.29245	0.409748	0.441076	0.0600313	3.23857	17.8137	1	1	0	0	0	0	1	1
4384	364.137	7.37934	Positive	NA	Unknown	15.5654	19.1847	20.905	20.0905	19.5035	17.6218	15.0891	10.8471	20.9178	20.4262	21.3122	21.007	20.2893	19.4295	15.837	3.44079	-5.35236	-1.24149	-0.407168	-0.916492	-0.785856	-1.80769	-0.747967	7.40629	3.20705	0.414212	0.110878	0.28362	0.235618	0.67952	0.222176	5.0192	1	0	0	0	0	0	0	1
4387	321.114	1.38926	Positive	NA	Unknown	21.9355	22.287	22.3326	21.1657	20.5596	19.9727	18.2123	11.1973	23.4292	22.8421	20.5176	21.0566	19.9766	17.9032	17.7009	10.8142	-1.49365	-0.555088	1.815	0.109172	0.583002	2.06952	0.511438	0.383023	1.46918	0.380527	1.95105	0.0593007	0.404977	2.36234	0.343324	0.241179	0	0	0	0	0	1	0	0
4388	424.252	9.06762	Positive	NA	Unknown	22.0407	22.1734	22.3443	21.5371	20.701	20.2978	18.0439	12.3327	22.1593	21.706	21.8659	21.7511	20.862	19.7151	14.9694	6.92728	-0.118526	0.46739	0.478378	-0.214009	-0.160987	0.582726	3.07443	5.40537	0.031852	0.138701	0.142391	0.05913	0.0438024	0.178446	1.57082	3.55262	0	0	0	0	0	0	0	1
4397	132.065	2.28112	Positive	NA	Unknown	21.3158	21.5638	20.9913	20.393	20.4099	18.854	20.0016	19.5986	21.6249	20.5156	20.1534	20.8472	20.0172	20.8156	21.2758	19.7914	-0.309133	1.04821	0.837904	-0.454179	0.392725	-1.96158	-1.27429	-0.192735	0.191626	0.911229	0.66928	0.303614	0.254408	2.24805	1.2018	0.112087	0	0	0	0	0	1	0	0
4399	147.054	0.718713	Positive	NA	Unknown	24.239	24.4466	24.4087	23.9761	20.7239	20.0112	22.7019	16.6966	23.3806	24.0064	23.8855	23.3253	21.9963	21.0599	19.977	14.8042	0.858396	0.44022	0.52316	0.650833	-1.27242	-1.04868	2.72492	1.89238	0.572807	0.246608	0.304102	0.399584	0.982709	0.750827	2.95395	1.73913	0	0	0	0	0	0	1	0
4400	289.124	5.57838	Positive	NA	Unknown	18.2832	21.539	22.4249	21.9264	21.9278	22.2045	24.0161	14.7299	19.1734	22.0754	23.4079	22.5072	21.9113	20.9074	21.7308	11.9541	-0.890218	-0.536365	-0.98301	-0.580726	0.0164255	1.29714	2.28534	2.77587	0.430896	0.230474	0.489913	0.253458	0.00579721	0.709318	1.58095	2.09901	0	0	0	0	0	0	0	1
4402	120.09	1.03913	Positive	NA	Unknown	19.506	19.1986	18.3622	18.0947	20.6111	18.5319	20.0512	18.5254	21.0852	21.0656	21.2503	21.3479	21.7877	20.2605	20.072	18.3695	-1.5792	-1.86706	-2.88812	-3.25319	-1.17666	-1.72863	-0.0207491	0.155897	1.87627	2.39493	4.44184	5.20701	1.2247	2.14079	0.0120031	0.0982821	0	1	1	1	0	1	0	0
4406	329.027	2.75914	Positive	NA	Unknown	19.7568	21.6136	20.9205	20.5936	21.0682	21.2994	21.1334	19.2112	22.389	21.6929	21.0839	21.3357	21.2467	20.6433	17.1516	18.3038	-2.63219	-0.0792641	-0.163335	-0.742083	-0.178508	0.656087	3.98179	0.907404	1.69126	0.0260139	0.0552446	0.304265	0.0607022	0.261863	3.08436	0.391146	0	0	0	0	0	0	1	0
4407	304.114	10.0112	Positive	NA	Unknown	21.341	21.3037	21.0107	20.9359	21.2814	21.4137	20.7433	19.9496	19.7722	19.7231	19.8759	19.8272	20.2155	20.1013	19.833	20.1108	1.56882	1.58063	1.13485	1.1087	1.06591	1.31244	0.9103	-0.161267	7.93977	8.00812	5.33677	5.1764	4.91409	6.41945	3.96581	0.35653	1	1	1	1	1	1	0	0
4408	155.033	6.84638	Positive	NA	Unknown	25.7467	25.7641	22.2853	23.2192	25.6731	25.2522	25.3392	25.3704	20.863	21.783	21.3995	20.2987	21.5063	19.6404	19.6914	17.4937	4.88372	3.98114	0.885752	2.92058	4.16676	5.61178	5.64778	7.87671	5.58327	4.25434	0.509774	2.74766	4.52655	6.64773	6.69983	9.76426	1	1	0	1	1	1	1	1
4411	223.09	8.99504	Positive	NA	Unknown	22.0455	22.0095	22.3855	21.5338	21.0809	21.1721	20.0486	15.2924	21.8759	21.296	22.0015	22.5017	21.5176	20.9517	18.4866	1.02141e-14	0.169511	0.713518	0.383997	-0.967876	-0.436686	0.220409	1.56197	15.2924	0.116174	0.669256	0.300944	1.02118	0.352966	0.156131	2.03843	22.9453	0	0	0	0	0	0	1	1
4412	611.136	7.75003	Positive	NA	Unknown	26.2597	26.674	26.5393	25.2409	25.0935	25.118	22.8223	12.8783	20.8971	19.9956	19.6762	18.5889	19.6306	16.0524	15.9815	13.678	5.36262	6.67837	6.86308	6.65196	5.46289	9.06559	6.84079	-0.799776	3.68041	4.96662	5.14883	4.94057	3.777	7.29401	5.12684	0.269925	1	1	1	1	1	1	1	0
4414	170.562	6.62996	Positive	NA	Unknown	18.2788	18.167	17.5555	18.807	19.0076	16.6966	18.9549	18.2069	20.3394	21.4603	20.692	20.2904	20.3309	18.8701	18.6894	17.5829	-2.0606	-3.29327	-3.13649	-1.48337	-1.32333	-2.17356	0.265525	0.624005	3.63155	6.74123	6.34911	2.26542	1.918	3.91244	0.223968	0.660258	1	1	1	1	0	1	0	0
4419	149.044	0.749604	Positive	NA	Unknown	24.1212	24.6821	24.6266	23.9077	21.0247	21.1605	18.4537	20.6469	22.4104	22.9036	21.899	21.316	20.4639	18.6996	18.8175	18.6736	1.71079	1.77851	2.72762	2.5917	0.560885	2.46087	-0.363861	1.97327	2.57168	2.72025	4.941	4.61442	0.531782	4.3012	0.306474	3.15806	1	1	1	1	0	1	0	1
4420	175.023	1.02948	Positive	NA	Unknown	21.8153	22.2114	21.7121	21.0534	20.5615	21.0976	19.2623	17.7752	21.027	20.6679	21.1421	20.5329	20.2034	18.837	18.1023	16.5	0.788362	1.54346	0.570022	0.520508	0.358112	2.26062	1.16	1.27515	0.65515	1.69278	0.427406	0.380696	0.240438	2.94745	1.12086	1.28361	0	0	0	0	0	1	0	0
4423	380.132	6.9797	Positive	NA	Unknown	16.5649	19.8542	21.1864	21.4667	19.8145	18.2787	13.3111	10.8007	18.8113	19.9937	21.0362	21.7399	21.1764	19.3875	16.3198	3.45792	-2.24632	-0.139462	0.150195	-0.273216	-1.36183	-1.10878	-3.00869	7.34278	0.87232	0.0340536	0.0367791	0.0690985	0.445533	0.343258	1.32078	4.73135	0	0	0	0	0	0	0	1
4424	309.204	10.811	Positive	NA	Unknown	13.8066	16.1621	18.8268	19.1122	21.1512	24.5957	26.6651	21.9659	17.7957	19.6243	21.5503	20.372	20.4483	20.9457	21.8871	19.3741	-3.98911	-3.46226	-2.72356	-1.25977	0.702909	3.64994	4.77794	2.59182	6.03378	5.02462	3.62003	1.18821	0.5317	5.38486	7.51389	3.37553	1	1	1	0	0	1	1	1
4426	160.132	7.47756	Positive	NA	Unknown	19.0914	20.3063	20.6036	18.1755	18.0729	17.7225	17.955	20.8364	19.4633	21.021	21.3202	19.9958	19.1504	18.1049	19.161	20.7104	-0.371942	-0.714698	-0.716635	-1.82029	-1.07744	-0.382359	-1.20602	0.125942	0.308211	0.719253	0.721918	2.74332	1.28049	0.3189	1.5071	0.0886628	0	0	0	1	0	0	0	0
4427	319.079	7.13726	Positive	NA	Unknown	21.572	22.7812	22.786	23.3657	22.2394	18.8289	16.1097	14.1097	19.1777	19.5967	20.7892	22.5211	22.2505	20.4539	18.3268	13.2713	2.39431	3.18445	1.9968	0.84456	-0.011062	-1.62504	-2.21707	0.838415	2.27071	3.42337	1.74253	0.523096	0.00477175	1.29256	2.02987	0.518097	1	1	0	0	0	0	1	0
4432	175.071	1.04039	Positive	NA	Unknown	20.5007	20.2793	20.0936	19.9422	20.0573	17.8491	15.0331	18.7835	21.4944	20.1603	20.7986	21.5762	19.1138	18.7553	19.597	17.8046	-0.993755	0.118957	-0.704981	-1.63403	0.943448	-0.90622	-4.56397	0.978953	0.546147	0.0471531	0.351135	1.08169	0.510028	0.483879	4.7027	0.535426	0	0	0	0	0	0	1	0
4435	218.947	0.596407	Positive	NA	Unknown	17.5596	17.8372	18.6553	17.3754	19.1262	20.4911	20.3314	17.2157	16.7032	18.2461	18.903	18.3417	19.6545	17.9183	19.0555	17.9408	0.856377	-0.40893	-0.247703	-0.966236	-0.528244	2.57276	1.27595	-0.725071	0.655137	0.255281	0.142318	0.772411	0.349488	3.15065	1.14103	0.524698	0	0	0	0	0	1	0	0
4438	177.054	8.15026	Positive	NA	Unknown	18.2925	19.5406	18.8932	20.9719	20.7502	20.6481	19.4278	17.0375	23.5247	22.9244	22.8669	22.3794	21.262	19.6963	17.2378	16.5886	-5.23224	-3.38381	-3.97362	-1.40748	-0.511844	0.951757	2.18993	0.448917	7.52431	4.31897	5.35217	1.22493	0.316373	0.707912	2.32797	0.269461	1	1	1	0	0	0	1	0
4442	193.158	9.80299	Positive	NA	Unknown	22.9537	22.8998	22.4554	21.4311	20.3531	19.8834	20.1637	17.5663	22.0162	21.4777	20.7013	20.3949	19.7719	18.4282	15.5233	12.4772	0.937424	1.42202	1.75403	1.03619	0.581223	1.45517	4.64031	5.08917	0.895178	1.62486	2.20641	1.03067	0.4698	1.6803	8.11009	8.9856	0	0	1	0	0	0	1	1
4447	201.527	6.78971	Positive	NA	Unknown	21.4919	21.187	21.4368	20.9964	19.6323	19.3391	18.7869	15.5544	20.6401	21.2502	20.8983	19.7184	19.2062	17.1565	14.369	3.55163	0.851877	-0.0631562	0.538466	1.27804	0.426122	2.18254	4.41789	12.0028	0.283545	0.0168773	0.164903	0.472331	0.126496	0.975594	2.70353	9.72491	0	0	0	0	0	0	1	1
4449	116.082	0.991213	Positive	NA	Unknown	19.9493	19.834	20.0359	20.1225	19.2718	18.3929	17.4891	19.4435	20.0111	20.3355	20.5036	21.0731	20.0552	19.5132	18.8377	19.4059	-0.0617737	-0.501481	-0.467654	-0.950607	-0.78336	-1.12032	-1.34861	0.037611	0.0520278	0.595314	0.542546	1.45632	1.10273	1.84945	2.42347	0.031	0	0	0	0	0	0	1	0
4450	243.025	9.64904	Positive	NA	Unknown	15.826	24.2579	23.686	24.9716	24.9384	23.728	23.8658	22.7148	10.48	14.6401	18.4822	20.5609	20.8406	17.4491	18.6187	1.77636e-14	5.34607	9.61772	5.20375	4.41069	4.09783	6.27892	5.24714	22.7148	0.879195	2.04472	0.84677	0.674749	0.611018	1.10299	0.856604	6.67204	0	1	0	0	0	0	0	1
4451	123.518	2.19021	Positive	NA	Unknown	22.9532	23.144	22.8889	22.0699	21.8427	20.8806	18.8029	20.1383	20.5056	20.6751	20.3052	21.299	21.0022	19.7335	19.2668	19.7448	2.44764	2.46883	2.58364	0.770899	0.840422	1.14711	-0.463908	0.393539	7.86945	7.9476	8.36736	1.62724	1.84541	2.90002	0.789795	0.631145	1	1	1	0	0	1	0	0
4453	204.605	10.8979	Positive	NA	Unknown	-3.55271e-15	13.4597	16.7975	17.2235	20.8848	24.1082	25.5274	22.7823	15.0179	20.5436	23.0542	20.1981	19.8418	20.3047	20.8739	15.9046	-15.0179	-7.08387	-6.25669	-2.97462	1.04305	3.80353	4.65355	6.87775	12.9774	5.73689	4.87829	1.69383	0.400225	2.42367	3.24062	5.52325	1	1	1	0	0	1	1	1
4455	124.014	0.583364	Positive	NA	Unknown	17.9685	16.9242	18.4866	18.3612	19.4687	20.3917	20.0004	17.3109	17.4591	19.5365	19.6713	19.3258	19.4552	18.7274	19.0921	18.2099	0.509421	-2.61231	-1.18472	-0.964613	0.0135226	1.66432	0.908325	-0.898951	0.295307	2.79075	0.892349	0.672406	0.00617322	1.44868	0.620008	0.611436	0	1	0	0	0	0	0	0
4457	296.056	0.919762	Positive	NA	Unknown	21.6017	22.3943	22.2378	20.8583	19.4057	17.0827	15.4702	3.24185e-14	22.1848	22.5407	22.1244	20.679	18.2598	14.2655	12.9162	5.10703e-14	-0.583135	-0.146319	0.113428	0.179232	1.14593	2.81722	2.55401	-1.86517e-14	0.357121	0.0728875	0.0555607	0.0907829	0.873734	3.19207	2.77315	0	0	0	0	0	0	1	1	0
4458	329.073	7.83705	Positive	NA	Unknown	21.2051	21.5187	22.3186	19.8391	18.1743	16.8112	16.6694	12.3634	20.9792	21.1856	21.6505	20.664	19.2459	17.6107	15.4577	3.38318	0.22584	0.333079	0.668089	-0.824834	-1.07161	-0.799454	1.21171	8.98024	0.0625474	0.0951082	0.209065	0.268871	0.371512	0.258904	0.43441	6.92446	0	0	0	0	0	0	0	1
4459	179.033	8.93741	Positive	NA	Unknown	20.6883	24.1656	23.5644	25.0113	25.2106	24.7903	24.1077	23.4248	14.4432	15.8942	18.2429	20.7753	21.2561	18.3555	18.1708	12.0733	6.24507	8.27139	5.32148	4.23596	3.95446	6.4348	5.93693	11.3515	3.95886	5.76086	3.16037	2.27326	2.05643	4.12592	3.68938	8.42062	1	1	1	1	1	1	1	1
4462	197.053	1.05205	Positive	NA	Unknown	20.931	20.6516	20.6271	20.0642	18.995	15.6331	11.4938	16.0731	21.3104	19.6323	20.5838	21.2524	18.4456	17.0571	18.5639	17.6047	-0.379395	1.01932	0.0432669	-1.18825	0.549346	-1.424	-7.07005	-1.53159	0.147275	0.487889	0.0148289	0.597413	0.226258	0.763621	7.12152	0.844516	0	0	0	0	0	0	1	0
4463	127.028	6.07794	Positive	NA	Unknown	20.4699	21.5505	22.262	21.1388	20.21	17.0122	15.1829	20.0714	20.4452	21.8925	21.851	21.3536	20.7153	18.7453	17.6674	18.1783	0.0247394	-0.341944	0.410956	-0.214828	-0.505251	-1.73309	-2.48459	1.89311	0.0183474	0.323123	0.407101	0.185134	0.532136	3.048	5.01784	3.45601	0	0	0	0	0	1	1	1
4464	242.554	6.78945	Positive	NA	Unknown	21.5819	21.2861	21.4796	20.9889	19.6236	19.2436	18.6537	14.2711	20.6175	21.2552	20.8706	19.6347	19.0949	16.8396	13.4315	-4.17444e-14	0.964397	0.0309572	0.608907	1.35411	0.528765	2.40403	5.22224	14.2711	1.11341	0.0206363	0.589741	1.81839	0.489515	4.14186	10.5316	22.8838	0	0	0	0	0	1	1	1
4467	142.086	1.51608	Positive	NA	Unknown	22.3237	22.4498	22.467	21.7071	22.0966	23.5793	23.6203	15.6733	21.082	22.3977	22.8024	21.5117	20.6791	19.6641	17.8743	15.5321	1.24171	0.0520555	-0.335481	0.195377	1.41746	3.91513	5.74593	0.141228	0.873082	0.0227336	0.167122	0.0913228	1.05176	4.51073	7.34758	0.0643605	0	0	0	0	0	1	1	0
4468	363.097	0.881471	Positive	NA	Unknown	19.7585	19.5839	19.337	19.1094	20.0666	19.6167	18.8796	1.17684e-14	20.1013	19.8096	19.3979	19.8187	18.5808	19.9062	12.3225	6.88338e-15	-0.342821	-0.225657	-0.0609483	-0.709327	1.48585	-0.289564	6.55713	4.88498e-15	0.0539207	0.034807	0.00914351	0.118412	0.279274	0.0451434	2.0999	0	0	0	0	0	0	0	1	0
4469	406.205	7.97828	Positive	NA	Unknown	20.6346	20.2145	20.4155	20.6007	19.8058	18.3756	16.5405	2.84217e-14	22.1056	21.3273	21.4852	21.0758	19.5592	16.3783	14.3066	6.8117	-1.471	-1.11283	-1.06965	-0.475107	0.246581	1.99731	2.23399	-6.8117	0.580561	0.403608	0.383829	0.145624	0.0707657	0.881281	1.03156	5.05512	0	0	0	0	0	0	0	1
4473	242.1	6.53618	Positive	NA	Unknown	22.592	24.7881	24.4257	21.6149	21.9113	20.6661	19.8983	18.735	22.3507	23.2141	20.7942	21.2788	21.604	20.1403	18.9237	18.5801	0.241264	1.57407	3.63149	0.336007	0.307294	0.525846	0.974556	0.154892	0.0872396	0.854084	2.84685	0.125684	0.113779	0.210024	0.448913	0.0542701	0	0	1	0	0	0	0	0
4474	117.091	6.59952	Positive	NA	Unknown	25.269	26.4749	22.797	24.0093	25.1228	21.9737	24.7229	22.3588	23.1543	22.2069	21.9313	23.2008	21.6847	21.0989	21.8987	21.4606	2.11468	4.26799	0.865679	0.808447	3.43817	0.8748	2.8242	0.898212	1.28832	3.55733	0.383313	0.351695	2.61119	0.388436	1.96111	0.401688	0	1	0	0	1	0	0	0
4475	118.035	0.587745	Positive	NA	Unknown	18.7917	18.3302	18.9721	18.6494	20.1683	21.061	20.5963	18.246	18.3716	19.4954	19.8756	19.6428	20.0981	19.3112	19.8192	18.8321	0.420075	-1.16514	-0.903575	-0.993437	0.0701572	1.7498	0.77707	-0.586136	0.395969	1.60686	1.11383	1.27579	0.0515651	2.90233	0.900167	0.611674	0	0	0	0	0	1	0	0
4480	146.081	1.66331	Positive	NA	Unknown	18.9682	20.9857	21.1043	22.2743	22.6817	22.108	21.2245	23.7528	18.8053	18.5129	18.8504	22.2459	22.171	21.403	21.1761	22.8297	0.16295	2.47276	2.25392	0.0283402	0.510657	0.705023	0.0484664	0.923138	0.0809277	2.60637	2.27815	0.0131384	0.298959	0.448588	0.0227053	0.640162	0	1	1	0	0	0	0	0
4483	188.054	2.2132	Positive	NA	Unknown	22.9679	23.0016	23.3242	22.5769	21.8429	22.0741	20.7568	18.8995	21.5843	21.5369	21.9577	21.9975	21.3357	20.0978	19.4579	17.0764	1.3836	1.46477	1.36655	0.579396	0.507205	1.97628	1.2988	1.82306	1.79804	1.95395	1.76582	0.531104	0.446498	3.01721	1.63977	2.6863	0	0	0	0	0	1	0	1
4484	238.054	7.91525	Positive	NA	Unknown	20.9743	20.645	21.8299	21.2214	19.9511	19.0626	17.8463	3.43892	21.2357	21.265	21.1993	20.1839	18.9095	13.2551	11.3102	3.93797	-0.261382	-0.620009	0.630554	1.03753	1.04156	5.80752	6.5361	-0.49905	0.0500755	0.12754	0.129975	0.230908	0.231976	2.35841	2.79885	0.10026	0	0	0	0	0	1	1	0
4488	378.137	7.26632	Positive	NA	Unknown	14.7527	16.2699	17.57	19.3601	19.9839	20.1023	18.927	13.9109	16.739	17.2052	18.1136	20.0775	21.2957	21.5998	19.23	8.91537	-1.98638	-0.935268	-0.543562	-0.717411	-1.31179	-1.49748	-0.302969	4.9955	0.619552	0.238837	0.127611	0.174942	0.361418	0.427565	0.0673759	2.29565	0	0	0	0	0	0	0	1
4490	424.067	8.42275	Positive	NA	Unknown	24.0866	23.8487	23.8967	22.7041	22.3759	22.5377	19.6755	11.7878	21.3934	21.5823	21.2001	19.9917	18.867	16.1573	14.6481	13.5045	2.69312	2.26638	2.69663	2.71244	3.50889	6.38044	5.0274	-1.71665	3.03309	2.3639	3.03875	3.06428	4.39325	9.15432	6.97672	1.57688	1	1	1	1	1	1	1	0
4491	200.127	6.4604	Positive	NA	Unknown	12.1961	15.2536	15.3031	17.7556	16.677	16.2107	14.7952	14.2737	16.5182	21.643	21.7611	20.208	19.2318	21.3024	18.3482	16.5875	-4.32215	-6.38945	-6.45794	-2.45238	-2.55475	-5.09177	-3.55298	-2.31381	3.45312	5.85137	5.93108	1.52017	1.61324	4.3363	2.60798	1.39731	1	1	1	0	0	1	1	0
4494	135.101	7.6552	Positive	NA	Unknown	22.815	24.4112	22.0163	23.3747	23.0603	22.3586	22.121	19.1931	19.4648	20.5603	19.6491	22.0896	20.8507	20.8033	20.6875	17.7796	3.35018	3.85083	2.36716	1.28516	2.20961	1.55525	1.43351	1.41345	3.0565	3.72283	1.84652	0.772377	1.67014	1.00793	0.898807	0.881281	1	1	0	0	0	0	0	0
4498	237.072	3.82183	Positive	NA	Unknown	22.3033	22.5228	22.6465	21.8078	21.1181	21.0283	23.189	19.704	21.916	22.5859	22.0438	20.7624	19.9064	19.1791	17.7509	18.0691	0.387239	-0.0631084	0.602709	1.04539	1.21167	1.84915	5.43814	1.63486	0.389121	0.0495292	0.695938	1.51439	1.87744	3.45808	12.4377	2.9011	0	0	0	0	0	1	1	1
4499	261.057	0.941329	Positive	NA	Unknown	21.819	22.6553	22.1829	22.7163	22.1841	21.0542	21.0303	19.986	18.863	19.2216	20.3567	20.2648	19.6331	19.9825	19.6962	20.6683	2.95602	3.43363	1.82624	2.4515	2.55091	1.07175	1.33411	-0.682229	4.47118	5.45435	2.2579	3.44946	3.64799	1.04423	1.42936	0.561413	1	1	1	1	1	0	0	0
4501	420.147	7.71408	Positive	NA	Unknown	14.2302	13.7263	17.9223	16.7979	16.8498	15.5838	12.0485	1.37668e-14	16.8909	19.4172	21.0176	20.99	19.9384	18.8604	15.2872	3.41996	-2.66067	-5.69092	-3.09529	-4.19209	-3.08862	-3.27655	-3.23875	-3.41996	1.15261	3.46058	1.43293	2.22863	1.42846	1.55622	1.53022	1.65625	0	1	0	1	0	0	0	0
4503	471.145	6.98719	Positive	NA	Unknown	14.9412	16.0252	16.1461	15.1923	15.8209	14.3515	11.4104	-8.88178e-16	19.4036	22.041	22.2594	21.3233	20.3198	19.4995	18.2752	7.02049	-4.4624	-6.01574	-6.11335	-6.13101	-4.49884	-5.14803	-6.8648	-7.02049	2.42889	3.72379	3.80843	3.82377	2.45776	2.98593	4.46705	4.60459	1	1	1	1	1	1	1	1
4505	205.117	0.882018	Positive	NA	Unknown	19.6235	17.878	18.0814	17.965	18.3763	19.7764	14.7738	15.1043	21.4058	20.5775	20.1694	20.2864	19.2536	17.9319	16.7136	15.3783	-1.78227	-2.69944	-2.08796	-2.32141	-0.877225	1.84444	-1.93983	-0.273962	1.40011	2.56172	1.76214	2.05677	0.523773	1.47137	1.58312	0.128446	0	1	0	1	0	0	0	0
4506	128.034	1.03953	Positive	NA	Unknown	19.9559	19.5279	19.3925	19.7447	19.8757	19.9741	20.1821	19.7589	19.8163	19.6461	19.9305	20.6252	20.1209	19.8179	20.0895	21.1213	0.139555	-0.118144	-0.538017	-0.880444	-0.245175	0.156113	0.092581	-1.36241	0.172531	0.142645	0.9609	1.95347	0.338649	0.196512	0.108611	3.66378	0	0	0	0	0	0	0	1
4507	173.042	0.772351	Positive	C5H10O5	D-Ribose	20.5965	21.6568	21.7818	20.1373	22.068	20.8849	22.1607	22.0917	21.5176	21.9179	21.6983	20.4402	18.5404	19.1772	22.1885	21.8194	-0.921034	-0.261149	0.0834524	-0.30288	3.5276	1.70777	-0.0277453	0.272293	0.618137	0.132546	0.0388346	0.156783	4.16908	1.46904	0.0125527	0.138934	0	0	0	0	1	0	0	0
4508	192.122	1.15236	Positive	NA	Unknown	17.4639	17.9223	17.5425	18.6724	19.1442	17.8276	16.2654	18.1266	18.4475	20.6893	21.2473	22.2311	21.8209	21.1959	19.1997	18.0142	-0.983629	-2.76698	-3.70478	-3.55869	-2.67669	-3.3683	-2.93429	0.112404	0.468193	1.98382	3.02909	2.85906	1.89009	2.64095	2.1612	0.0397187	0	1	1	1	0	1	1	0
4509	207.137	8.42542	Positive	NA	Unknown	20.8865	21.8295	21.8039	19.9885	18.5026	16.3295	16.8056	17.5145	21.0998	22.4708	21.7232	19.296	17.7039	16.2491	15.2265	13.2844	-0.213317	-0.64131	0.080705	0.692461	0.798695	0.0803801	1.57911	4.23014	0.195663	0.790236	0.0664052	0.879038	1.07475	0.0661196	2.88417	10.0403	0	0	0	0	0	0	1	1
4511	348.272	10.5355	Positive	NA	Unknown	17.3294	18.7576	18.3448	18.474	19.0721	20.4723	21.8996	22.3313	20.6853	20.9205	20.9431	18.7076	17.3962	17.9917	20.2251	20.6805	-3.35597	-2.16292	-2.59826	-0.233599	1.67584	2.48054	1.67449	1.65081	3.93381	2.09606	2.73598	0.118035	1.44566	2.55847	1.44397	1.4145	1	1	1	0	0	1	0	0
4513	581.147	8.90849	Positive	NA	Unknown	19.3824	19.0481	18.7758	17.3713	16.9987	16.6678	16.1784	9.36868	22.137	20.4312	20.2285	19.0219	17.5334	15.7362	15.7053	1.64313e-14	-2.75463	-1.38307	-1.45269	-1.65051	-0.534656	0.931585	0.473162	9.36868	0.862709	0.347184	0.369249	0.434379	0.113957	0.214902	0.0995829	4.93584	0	0	0	0	0	0	0	1
4514	228.017	9.35289	Positive	NA	Unknown	19.4799	18.959	18.2835	17.4195	15.0359	13.7792	-1.03621e-15	3.5083e-14	20.9577	21.7001	21.3539	20.2465	16.4319	3.47813	-1.03621e-15	3.15303e-14	-1.47779	-2.7411	-3.07038	-2.82693	-1.39602	10.3011	-7.88861e-31	3.55271e-15	0.584053	1.38235	1.62959	1.44541	0.54155	8.38657	0	0	0	0	0	0	0	1	0	0
4515	326.095	10.0126	Positive	NA	Unknown	19.3567	19.164	19.7042	19.6408	19.4302	18.7144	19.4131	20.3187	20.2779	20.1985	19.991	20.2322	20.2281	20.0498	20.4486	20.403	-0.921195	-1.03453	-0.286844	-0.591374	-0.797908	-1.33535	-1.03557	-0.0842772	3.80062	4.45874	0.716742	2.01011	3.10232	6.22156	4.46477	0.156182	0	1	0	0	0	1	1	0
4519	175.023	1.1552	Positive	NA	Unknown	22.9986	22.9232	23.4713	23.3894	23.0774	23.4315	20.5983	17.3025	20.8908	20.1179	20.4538	21.3733	21.097	20.1376	18.5344	17.2603	2.10786	2.80532	3.01752	2.01605	1.98046	3.29393	2.06394	0.0422289	3.89754	5.7138	6.26501	3.66269	3.57221	6.97465	3.78494	0.0310693	1	1	1	1	1	1	1	0
4522	265.551	8.3748	Positive	NA	Unknown	20.4756	21.0432	21.1891	20.4577	20.4625	19.875	19.488	14.5011	21.0919	20.5802	20.9231	20.6337	20.2701	18.5667	16.5555	3.62348	-0.616267	0.462956	0.265965	-0.176058	0.192423	1.30825	2.93248	10.8776	0.180662	0.130399	0.071046	0.0458783	0.0503708	0.452893	1.3736	8.22392	0	0	0	0	0	0	0	1
4524	397.145	7.66109	Positive	NA	Unknown	17.3646	16.6836	19.2847	18.0832	17.0208	15.4956	13.5362	12.9017	21.1219	21.8262	21.4625	19.9141	19.0168	15.9389	16.9044	10.3626	-3.75728	-5.14258	-2.17772	-1.83086	-1.99601	-0.443332	-3.36824	2.53903	4.89236	7.26737	2.26834	1.76126	1.99772	0.261512	4.22057	2.83358	1	1	1	0	1	0	1	1
4525	163.074	8.10103	Positive	NA	Unknown	21.2763	21.0253	20.7894	19.8842	20.1531	18.8665	18.4147	17.216	22.6754	21.596	21.1505	20.84	20.2162	18.7995	15.4362	15.3392	-1.39915	-0.570753	-0.361114	-0.955801	-0.0631139	0.066972	2.97853	1.87679	2.48551	0.690491	0.378845	1.42723	0.0521422	0.0555158	6.92124	3.78079	1	0	0	0	0	0	1	1
4527	161.091	0.93626	Positive	NA	Unknown	18.0723	19.6757	16.035	18.8659	21.2095	18.4713	15.6342	18.0285	19.3649	18.8447	18.8427	21.9284	21.4223	19.8204	17.9879	16.8332	-1.29265	0.830935	-2.80764	-3.06249	-0.212767	-1.34904	-2.35371	1.19529	0.602533	0.340453	1.79854	2.04158	0.0714965	0.638094	1.39198	0.54294	0	0	0	1	0	0	0	0
4529	134.105	2.50402	Positive	NA	Unknown	19.2434	19.1151	18.2604	17.127	18.5556	18.6625	16.1495	3.47465	21.0119	22.4375	22.2217	20.1891	19.3743	19.3641	19.3494	13.6053	-1.76849	-3.32238	-3.96132	-3.06205	-0.818729	-0.701608	-3.19986	-10.1306	0.68304	1.66709	2.15456	1.48069	0.255226	0.212355	1.57841	7.65587	0	0	1	0	0	0	0	1
4534	142.086	6.59152	Positive	NA	Unknown	19.5561	20.3227	20.2266	21.0367	21.21	20.9242	19.1135	21.4638	19.6449	20.5033	20.3258	21.739	21.5991	21.3886	20.0619	20.0154	-0.0888092	-0.18065	-0.0992042	-0.702293	-0.389132	-0.464369	-0.948484	1.44835	0.0641882	0.139653	0.0722599	0.751348	0.346575	0.433588	1.14489	2.11466	0	0	0	0	0	0	0	1
4536	379.098	8.00864	Positive	NA	Unknown	18.8516	19.8567	20.5127	21.1427	19.4875	18.7478	17.874	12.5561	21.0146	20.9604	21.2427	20.3864	19.5825	17.0419	15.0814	10.6821	-2.16305	-1.10369	-0.730021	0.756293	-0.0949757	1.70589	2.79261	1.87404	3.59748	1.3596	0.758456	0.796314	0.0666508	2.56157	5.09832	2.93381	1	0	0	0	0	1	1	1
4537	446.163	8.68176	Positive	NA	Unknown	20.558	20.9032	21.1673	20.5817	19.5711	18.929	15.9992	-1.62093e-14	21.0564	20.9447	21.1951	20.3821	18.8531	15.0364	9.48462	1.9762e-14	-0.49836	-0.0415599	-0.0278624	0.199626	0.717966	3.89257	6.51461	-3.59712e-14	0.111486	0.00839832	0.00561269	0.0418137	0.168282	1.51789	3.20411	0	0	0	0	0	0	0	1	0
4539	103.028	2.27322	Positive	NA	Unknown	21.1487	21.0243	20.6376	20.2671	19.9306	19.1905	17.7869	18.4496	21.276	21.7755	21.256	21.2068	20.7096	19.1968	16.3676	17.6332	-0.127246	-0.751255	-0.618388	-0.939692	-0.779005	-0.00627636	1.41926	0.816421	0.0946629	0.824925	0.632284	1.1303	0.867583	0.0042612	2.05396	0.926386	0	0	0	0	0	0	1	0
4541	153.006	0.592942	Positive	NA	Unknown	17.2196	15.9914	17.7447	16.6289	19.3039	20.2068	19.7533	16.1036	17.219	18.5252	19.0537	18.7831	19.2535	18.4912	18.8783	17.1288	0.000612311	-2.53376	-1.30896	-2.15415	0.0503386	1.71569	0.874957	-1.02521	0.000251277	2.31036	0.892273	1.82345	0.0211454	1.3105	0.516701	0.638	0	1	0	0	0	0	0	0
4544	422.236	9.15831	Positive	NA	Unknown	22.0464	22.6187	22.668	21.9615	20.9254	20.512	19.0109	15.2668	20.8531	21.0901	20.9307	20.4	19.8423	18.2882	14.9979	3.43267	1.19335	1.52852	1.73725	1.56154	1.08315	2.22378	4.01302	11.8342	0.406822	0.561365	0.666468	0.577543	0.359885	0.936961	2.19476	9.10909	0	0	0	0	0	0	1	1
4549	173.058	1.44611	Positive	NA	Unknown	20.8596	21.4396	20.3532	21.1464	21.3816	21.15	21.5855	17.7196	18.9017	20.6031	15.5276	20.5712	20.0147	21.0548	21.1744	17.6014	1.95794	0.836568	4.82565	0.575191	1.36692	0.0951996	0.411103	0.11813	1.26799	0.399067	4.61519	0.251195	0.764309	0.0347482	0.169275	0.0435103	0	0	1	0	0	0	0	0
4552	448.216	8.41507	Positive	NA	Unknown	15.212	18.389	18.7117	18.218	18.0194	17.3428	16.8994	12.0971	17.7493	20.4458	21.1873	20.7609	19.9596	18.8274	18.0059	-5.37348e-14	-2.53733	-2.05685	-2.47562	-2.54291	-1.94017	-1.48459	-1.10659	12.0971	4.70689	3.52467	4.5534	4.72079	3.24491	2.20488	1.43731	21.2246	1	1	1	1	1	1	0	1
4553	406.147	7.58565	Positive	NA	Unknown	11.7791	9.12883	18.2999	17.7128	14.5056	4.34599	-3.55271e-15	3.417	19.2279	17.204	20.7643	20.9571	19.6344	19.1364	15.7124	2.30926e-14	-7.44877	-8.07516	-2.46437	-3.24427	-5.12884	-14.7904	-15.7124	3.417	2.09188	2.35302	0.447177	0.642726	1.21706	5.46976	5.91053	0.689496	1	1	0	0	0	1	1	0
4558	191.038	1.22434	Positive	NA	Unknown	20.9262	21.7507	22.1372	21.5589	20.8975	21.0914	21.783	20.6576	22.2951	22.6763	22.009	22.153	21.3004	20.264	21.0925	20.7173	-1.36893	-0.925692	0.128175	-0.5941	-0.402923	0.827324	0.690465	-0.0597404	2.31278	1.30929	0.108583	0.702224	0.420404	1.11459	0.863825	0.0477969	1	0	0	0	0	0	0	0
4559	131.049	8.68172	Positive	NA	Unknown	21.4865	21.4393	21.4603	21.1189	20.2363	19.9014	22.0779	18.4317	21.6056	21.3119	21.433	20.8761	19.6968	16.4787	16.9892	15.031	-0.119119	0.127353	0.0272287	0.24282	0.539522	3.4227	5.08874	3.40071	0.0932582	0.100342	0.0198195	0.20862	0.565028	7.3126	11.2068	7.25703	0	0	0	0	0	1	1	1
4560	116.053	9.86465	Positive	NA	Unknown	15.8785	19.6908	18.8073	18.2552	16.5465	16.909	17.016	10.9601	17.1044	22.1186	21.5531	19.9203	15.9538	18.3226	14.906	14.4201	-1.22588	-2.42774	-2.74578	-1.66516	0.592761	-1.41357	2.11007	-3.45997	0.547559	1.41656	1.69386	0.829319	0.220791	0.662566	1.15777	2.37275	0	0	0	0	0	0	0	1
4561	133.099	2.49623	Positive	NA	Unknown	18.6924	18.5164	16.7399	16.7087	17.9123	17.9994	15.4015	10.3812	20.6263	22.1722	22.0353	19.8751	19.1296	19.0524	19.2118	14.254	-1.93381	-3.65583	-5.29543	-3.16636	-1.21726	-1.05304	-3.81024	-3.87285	2.67748	6.37401	9.7369	5.30832	1.36574	1.10933	6.70643	6.84051	1	1	1	1	0	0	1	1
4564	377.151	6.85676	Positive	NA	Unknown	16.8783	3.49343	9.75042	18.7519	20.2047	18.7523	20.8658	19.4136	18.2965	13.1396	18.249	20.5932	20.0039	19.983	20.3112	18.9071	-1.41817	-9.64621	-8.49857	-1.84122	0.200741	-1.23068	0.554536	0.506554	0.25609	3.53238	2.94976	0.352864	0.0300495	0.216246	0.0878761	0.0796639	0	1	1	0	0	0	0	0
4565	244.092	1.50945	Positive	C9H13N3O5	CYTIDINE	17.8738	20.3939	19.2663	19.1509	19.992	20.9634	21.3719	18.8885	21.8649	21.1219	18.392	21.411	21.1017	20.0221	17.9686	18.6308	-3.99104	-0.728003	0.874238	-2.26005	-1.10972	0.941298	3.40326	0.257668	2.67272	0.262531	0.328482	1.17102	0.444148	0.360232	2.12029	0.0806557	1	0	0	0	0	0	1	0
4569	177.054	8.27307	Positive	NA	Unknown	19.2384	19.5406	18.7978	20.9154	20.6837	20.509	19.4278	16.7992	21.6689	21.5505	21.6971	21.4985	21.1058	19.5922	17.2378	16.901	-2.43056	-2.00999	-2.89932	-0.5831	-0.422081	0.916741	2.18993	-0.101826	3.0327	2.30425	3.89061	0.411352	0.275098	0.748977	2.60977	0.0557888	1	1	1	0	0	0	1	0
4570	163.038	8.88277	Positive	NA	Unknown	22.9227	22.3388	22.0407	20.7006	19.62	19.2464	17.2953	18.7364	21.2608	22.1018	21.4642	20.6935	18.3942	17.0624	15.2785	17.0079	1.66187	0.237049	0.576492	0.00707062	1.22586	2.18393	2.01681	1.7285	2.51479	0.186656	0.561437	0.00471366	1.61424	3.71563	3.32125	2.66215	1	0	0	0	0	1	1	1
4571	142.086	6.48252	Positive	NA	Unknown	19.615	20.108	19.8244	22.0296	21.9622	19.9701	19.1305	21.2526	19.1782	19.3397	20.1884	22.5023	21.9736	21.4194	19.9445	19.8383	0.436789	0.768272	-0.364045	-0.472732	-0.011356	-1.44934	-0.813978	1.41431	0.4011	0.850995	0.319151	0.443854	0.00774037	2.11779	0.922512	2.04354	0	0	0	0	0	1	0	1
4572	611.136	7.66412	Positive	NA	Unknown	25.483	25.937	25.8661	24.9585	24.9085	24.7938	22.5062	12.8266	20.872	20.0739	19.8446	18.4697	19.498	16.0147	16.0068	13.7297	4.611	5.86314	6.0215	6.48882	5.41051	8.77903	6.49944	-0.903136	3.13639	4.38766	4.54916	5.02734	3.92891	7.3446	5.03823	0.328245	1	1	1	1	1	1	1	0
4575	121.064	8.20065	Positive	NA	Unknown	20.6882	20.136	18.9768	19.3168	20.1658	19.7851	19.2763	18.7115	21.6235	21.5871	20.6857	20.7598	19.1174	19.2318	17.5194	14.8647	-0.935291	-1.45119	-1.70889	-1.44299	1.04834	0.553294	1.75686	3.84685	0.746744	1.3886	1.76072	1.37727	0.87442	0.374155	1.83326	5.52195	0	0	0	0	0	0	0	1
4577	254.064	7.27589	Positive	NA	Unknown	24.1063	22.6934	21.4449	18.7766	15.2495	17.3782	18.1402	18.2627	22.1553	20.9714	19.4249	10.1085	8.88323	5.58452	15.1247	7.10618	1.95101	1.72197	2.01999	8.66818	6.36627	11.7936	3.01553	11.1565	0.22847	0.197197	0.238126	1.66235	1.06567	2.60299	0.389789	2.40145	0	0	0	0	0	1	0	1
4581	447.28	12.2714	Positive	NA	Unknown	13.9274	15.2025	9.05948	14.3185	7.72758	20.8319	19.591	16.2285	0	15.5646	17.907	15.9874	22.1577	21.0886	20.9842	13.1543	13.9274	-0.362046	-8.84751	-1.66895	-14.4302	-0.256719	-1.39319	3.07415	4.79201	0.0477205	2.53384	0.261489	5.02339	0.03334	0.210831	0.566553	1	0	1	0	1	0	0	0
4582	189.055	2.15477	Positive	NA	Unknown	21.0298	21.7594	22.6166	21.5142	20.9465	20.6001	20.4325	19.6541	20.6978	21.7709	21.4591	20.9458	20.7208	19.0267	18.7433	18.4712	0.332048	-0.0114627	1.15749	0.568333	0.225665	1.57338	1.68924	1.1829	0.429079	0.0108726	2.45708	0.881763	0.26524	3.8091	4.20246	2.53573	0	0	1	0	0	1	1	1
4583	275.089	8.00171	Positive	NA	Unknown	16.8214	16.3227	15.0529	15.3994	16.8829	13.7169	13.7965	14.1872	21.4303	20.8032	20.1477	20.1419	19.2665	16.6307	14.39	12.5232	-4.60889	-4.48044	-5.09484	-4.74247	-2.38359	-2.91375	-0.593534	1.66399	6.05613	5.84335	6.85389	6.27667	2.44203	3.26063	0.356634	1.44706	1	1	1	1	1	1	0	0
4584	239.994	1.90941	Positive	NA	Unknown	15.7677	18.4779	17.6534	20.9247	22.0082	21.7703	21.8754	20.8172	12.5893	14.9857	16.5994	20.8402	21.3825	21.6951	21.0342	20.9336	3.17836	3.49226	1.05402	0.0845146	0.625687	0.075161	0.841246	-0.116436	1.75823	2.01717	0.385182	0.0235283	0.204109	0.0208641	0.290955	0.0327343	0	1	0	0	0	0	0	0
4589	233.023	0.925494	Positive	NA	Unknown	21.3236	21.7739	21.8406	20.6947	20.066	19.1677	18.5854	17.0552	19.2659	19.1134	19.1162	19.1907	18.5226	18.1238	16.8833	15.9848	2.05764	2.6605	2.72447	1.504	1.5434	1.04392	1.70216	1.07046	1.66675	2.42392	2.509	1.06118	1.10092	0.63995	1.26648	0.662021	0	1	1	0	0	0	0	0
4592	159.054	6.62355	Positive	NA	Unknown	18.4644	18.4245	17.9639	18.8163	19.2181	16.789	18.9998	17.741	20.0805	21.3615	20.4286	19.8672	20.0659	18.3022	18.0461	17.13	-1.61613	-2.93705	-2.46465	-1.05093	-0.847849	-1.51317	0.953751	0.611039	2.25479	5.21158	4.11632	1.20708	0.890612	2.04846	1.05112	0.569737	1	1	1	0	0	1	0	0
4594	176.055	1.44102	Positive	C6H9NO5	N-ACETYL-L-ASPARTIC ACID	21.8855	21.7332	22.017	21.6199	21.697	21.3281	19.4358	18.7083	20.7251	20.5977	20.8843	21.7259	21.2965	20.3499	19.6102	16.8383	1.16037	1.13544	1.13269	-0.105975	0.400518	0.978196	-0.174385	1.86995	2.20347	2.1348	2.12729	0.101841	0.494852	1.71766	0.178472	4.34438	1	1	1	0	0	0	0	1
4595	241.028	1.03847	Positive	NA	Unknown	22.5425	22.8978	22.5426	21.4133	20.4791	19.4505	18.4292	14.115	20.5987	20.8222	20.7469	20.4053	19.7226	18.5967	17.9629	13.2956	1.94386	2.07563	1.79566	1.00798	0.756576	0.853817	0.466307	0.819439	1.98392	2.18308	1.7672	0.775866	0.527109	0.61906	0.285479	0.585929	1	1	0	0	0	0	0	0
4603	349.089	7.79802	Positive	NA	Unknown	21.4148	21.5193	22.2164	22.1368	22.3519	21.3328	20.2558	14.4807	21.1011	20.1075	20.6463	20.4994	20.5918	18.7299	16.3679	12.078	0.313673	1.41186	1.57005	1.63746	1.76013	2.60286	3.88786	2.40268	0.218064	1.59988	1.86761	1.98575	2.20637	3.86405	6.55255	3.45392	0	0	0	1	1	1	1	1
4604	219.016	1.32565	Positive	NA	Unknown	20.581	20.2713	20.6669	19.4776	19.5415	19.5787	19.3019	19.3744	21.377	20.7898	20.8359	20.8644	20.0682	19.9158	19.7459	19.7978	-0.795937	-0.518523	-0.168998	-1.38685	-0.526679	-0.337109	-0.444005	-0.423326	1.63188	0.884146	0.210058	3.63966	0.903644	0.493986	0.713658	0.668841	0	0	0	1	0	0	0	0
4605	223.048	9.53639	Positive	NA	Unknown	15.2261	17.1151	16.1637	18.078	18.4827	18.0027	17.3204	13.8695	20.4437	21.4749	21.1394	20.0333	16.2833	10.4069	1.11022e-15	1.42109e-14	-5.21765	-4.35974	-4.97568	-1.95538	2.19945	7.59584	17.3204	13.8695	5.60242	4.41615	5.2677	1.39792	1.65813	8.77516	18.24	15.4537	1	1	1	0	0	1	1	1
4607	121.028	1.18	Positive	NA	Unknown	17.3756	19.3745	19.4179	21.3231	21.3011	20.858	20.2827	19.2383	20.7684	21.2624	20.8631	21.2292	21.03	21.0634	20.5501	20.4576	-3.39282	-1.88792	-1.44514	0.0938665	0.271052	-0.205393	-0.267363	-1.21937	5.37964	2.37433	1.60829	0.0558986	0.179632	0.130946	0.176808	1.25787	1	1	0	0	0	0	0	0
4608	216.053	2.48735	Positive	NA	Unknown	19.2341	19.0775	17.6577	17.2541	18.6754	18.7046	16.7394	11.5343	20.6937	21.8655	21.7855	19.976	19.4472	19.2351	19.5353	14.5559	-1.45963	-2.78802	-4.12781	-2.72191	-0.771804	-0.530529	-2.79588	-3.02158	1.59855	4.05534	6.76431	3.92286	0.650969	0.398254	4.07112	4.52671	0	1	1	1	0	0	1	1
4611	191.142	12.4278	Positive	NA	Unknown	20.3441	20.2874	20.246	20.5579	19.3509	20.8945	18.8688	18.7825	19.8095	19.1636	20.7057	21.5991	19.5203	19.9609	19.8822	19.5974	0.534536	1.12373	-0.459732	-1.04121	-0.169333	0.93362	-1.01342	-0.814852	0.70376	2.02808	0.574438	1.81453	0.167659	1.5481	1.74433	1.27162	0	1	0	0	0	0	0	0
4612	275.109	4.13022	Positive	NA	Unknown	21.2457	21.7623	22.0611	22.3097	22.3642	22.9783	24.5782	18.644	20.7905	21.1892	20.422	20.2908	21.4557	19.6599	21.3851	14.9117	0.455172	0.573096	1.63915	2.01889	0.908505	3.31837	3.19316	3.73226	0.239528	0.316895	1.29867	1.7569	0.572045	3.60072	3.41065	4.23889	0	0	0	0	0	1	1	1
4617	469.294	12.2587	Positive	NA	Unknown	13.3341	14.3047	7.67858	12.7343	3.64417	20.4652	19.259	15.6509	0	15.7064	17.6777	16.0848	22.1084	21.1736	21.0133	14.1536	13.3341	-1.40171	-9.99913	-3.35056	-18.4642	-0.708425	-1.75428	1.49729	5.02051	0.233071	3.38088	0.707135	7.53857	0.106791	0.305795	0.252214	1	0	1	0	1	0	0	0
4620	353.083	7.4395	Positive	NA	Unknown	15.6259	12.631	14.0847	15.7315	17.9666	20.3549	21.3312	13.8951	20.6819	20.4816	19.7943	19.2878	19.5467	19.0826	18.2165	13.7533	-5.05594	-7.85063	-5.70955	-3.55633	-1.58007	1.27228	3.11472	0.14174	8.75049	13.479	9.96107	5.75644	1.84625	1.34775	4.84099	0.087463	1	1	1	1	0	0	1	0
4621	247.011	2.92282	Positive	NA	Unknown	22.0385	22.6049	22.8191	22.1303	21.9656	20.8483	19.6781	19.2167	21.7186	22.094	22.0919	22.0203	21.7109	19.8568	19.0311	18.0788	0.319884	0.510899	0.727232	0.110025	0.254732	0.991505	0.646953	1.13796	0.368696	0.680178	1.11216	0.105597	0.278148	1.74005	0.942518	2.12732	0	0	0	0	0	0	0	1
4623	219.053	6.50953	Positive	NA	Unknown	22.7552	23.9606	21.0158	22.9275	23.0694	22.0134	22.7986	17.8292	20.5267	21.3963	19.9829	21.9186	20.2122	21.0037	20.8294	18.2083	2.22856	2.56422	1.03296	1.00885	2.85715	1.00967	1.96919	-0.379129	1.6839	2.06621	0.572387	0.554714	2.41879	0.55531	1.40701	0.166464	0	1	0	0	1	0	0	0
4629	252.106	0.927815	Positive	NA	Unknown	19.983	21.4001	19.8713	22.611	21.0498	20.1683	19.6976	15.571	21.138	21.904	23.2637	23.7733	21.1798	21.0806	18.0393	14.5484	-1.15498	-0.503868	-3.39243	-1.1623	-0.129926	-0.912297	1.65828	1.02269	0.449197	0.164159	2.01651	0.452876	0.0377922	0.333166	0.726526	0.384501	0	0	1	0	0	0	0	0
4633	152.009	0.582875	Positive	NA	Unknown	17.0294	15.1285	17.3718	16.1345	19.0632	20.019	19.5276	15.6977	15.5923	18.2904	18.8487	18.5524	19.0423	18.1665	18.6136	15.6006	1.43711	-3.16197	-1.47686	-2.41787	0.020962	1.85245	0.914017	0.0970419	0.998052	3.11922	1.03731	2.11551	0.00856623	1.43542	0.537537	0.0410661	0	1	0	1	0	0	0	0
4637	502.262	9.72017	Positive	NA	Unknown	22.4809	22.3337	22.1071	21.4833	20.5113	20.2923	17.9233	4.60743e-15	20.9907	20.3276	20.7944	20.4625	19.3173	18.0418	16.49	-1.37834e-13	1.49025	2.00614	1.31271	1.02086	1.19405	2.25045	1.43334	1.42442e-13	3.31274	4.98793	2.76245	1.91649	2.40821	5.79197	3.13409	0	1	1	1	0	1	1	1	0
4640	332.278	12.1767	Positive	NA	Unknown	19.4899	20.8166	19.5373	21.0799	21.7841	21.006	21.4931	17.8309	17.4457	20.284	19.9868	22.1618	20.4565	21.7685	21.299	13.7633	2.04424	0.532639	-0.449448	-1.08194	1.32754	-0.762488	0.194106	4.06756	1.52824	0.253982	0.207534	0.625166	0.826672	0.395689	0.0808072	4.11116	0	0	0	0	0	0	0	1
4642	155.044	6.93543	Positive	NA	Unknown	17.1557	19.1377	18.6606	20.7869	20.742	10.563	11.792	10.8657	15.8138	17.2696	19.5484	21.7485	20.0025	17.7737	17.5006	10.4846	1.34189	1.86809	-0.887828	-0.961627	0.739444	-7.21067	-5.70857	0.381107	0.221937	0.331497	0.137739	0.150778	0.112273	2.11679	1.50619	0.0548611	0	0	0	0	0	1	0	0
4643	208.063	1.78053	Positive	NA	Unknown	16.955	18.3937	17.6321	16.5911	18.6891	16.6312	15.5532	12.7159	21.1889	20.3958	19.7419	20.0468	20.6334	19.8124	19.6376	16.4776	-4.23387	-2.00211	-2.10977	-3.45566	-1.94426	-3.18122	-4.08437	-3.76169	4.0972	1.39419	1.50406	3.07925	1.33638	2.73393	3.8984	3.47394	1	0	0	1	0	1	1	1
4644	180.101	7.947	Positive	NA	Unknown	15.499	15.7959	18.8148	20.9149	21.1489	20.9072	20.9214	21.4925	15.6838	18.39	19.0577	21.4463	20.9476	20.4957	19.2085	19.4641	-0.184789	-2.59407	-0.242919	-0.531473	0.201361	0.411536	1.71286	2.02839	0.100896	3.11756	0.13678	0.345341	0.110921	0.252444	1.70695	2.18432	0	1	0	0	0	0	0	1
4645	243.603	9.00382	Positive	NA	Unknown	21.2118	21.1896	21.5025	21.1243	21.0789	21.1732	20.1208	15.2927	20.7114	20.3869	21.0026	21.7319	21.165	20.6905	17.7533	7.21298	0.500454	0.802713	0.499917	-0.607581	-0.0861023	0.482732	2.36745	8.07971	0.141783	0.245607	0.141611	0.176981	0.0217991	0.136129	1.00626	5.72088	0	0	0	0	0	0	0	1
4646	161.028	0.966753	Positive	NA	Unknown	19.2308	19.0543	17.2798	19.2413	20.207	20.0703	20.9327	19.3278	17.8708	19.0516	19.7496	20.6284	20.1334	20.7433	20.1043	20.3408	1.36006	0.00276072	-2.46986	-1.38708	0.073608	-0.672996	0.828415	-1.01298	0.976412	0.00116389	2.31161	1.00389	0.0321057	0.380935	0.497596	0.650088	0	0	1	0	0	0	0	0
4655	134.105	2.19028	Positive	NA	Unknown	17.8298	18.9177	18.1642	18.2304	19.4358	18.8385	16.3237	3.31926	19.9716	21.2915	21.1923	21.2709	20.4954	19.267	18.6794	13.4534	-2.14178	-2.37381	-3.02808	-3.04056	-1.05962	-0.428496	-2.35568	-10.1341	0.881495	1.01857	1.44369	1.45231	0.347487	0.119905	1.00759	7.60293	0	0	0	0	0	0	0	1
4657	130.033	1.67556	Positive	NA	Unknown	21.096	20.7472	20.9031	20.0021	18.7302	16.8897	16.7523	17.4537	21.2091	21.1642	21.1908	21.0557	19.3327	17.5074	16.0832	16.0258	-0.113167	-0.416957	-0.287617	-1.05363	-0.602454	-0.617633	0.669126	1.42783	0.116603	0.562282	0.348482	2.07948	0.929556	0.962631	1.07807	3.22703	0	0	0	1	0	0	0	1
4658	200.091	5.18238	Positive	NA	Unknown	17.1471	19.7175	19.9829	22.6775	22.651	21.3269	18.5793	17.5645	14.9113	16.1319	19.0101	22.4742	22.4799	20.8634	18.7255	11.3954	2.23577	3.58563	0.972802	0.203364	0.171125	0.463488	-0.146257	6.16908	0.964163	1.90345	0.320708	0.0547293	0.0456341	0.134036	0.038727	4.14157	0	0	0	0	0	0	0	1
4659	209.153	10.1537	Positive	NA	Unknown	19.8365	20.1266	20.9506	19.6148	18.0182	18.7559	19.4019	18.2726	20.349	21.3163	20.6543	19.4683	18.0432	16.1722	18.4032	16.6869	-0.512493	-1.1897	0.29634	0.146506	-0.0250753	2.5837	0.998697	1.58572	0.632652	2.08972	0.31232	0.136398	0.0209351	6.12613	1.61911	3.16684	0	1	0	0	0	1	0	1
4663	176.07	9.87971	Positive	NA	Unknown	19.0328	19.442	20.6995	20.2917	19.7159	18.4103	18.7034	15.1224	19.1193	19.1731	21.9275	20.3514	19.8128	17.9626	13.9158	14.7531	-0.0865083	0.268903	-1.228	-0.059671	-0.0969231	0.447668	4.78752	0.369351	0.0439757	0.150497	1.03123	0.0298922	0.0495492	0.273705	6.89788	0.217401	0	0	0	0	0	0	1	0
4665	155.032	2.49745	Positive	NA	Unknown	18.2093	19.0871	18.5627	21.5367	21.6357	20.9765	19.8573	16.1907	14.5735	17.951	19.5771	22.6151	20.9102	20.836	18.563	17.7287	3.63572	1.13608	-1.01433	-1.07843	0.725484	0.140494	1.29426	-1.53797	2.69242	0.520474	0.449013	0.486167	0.294637	0.0469576	0.618906	0.782693	1	0	0	0	0	0	0	0
4666	238.037	7.23815	Positive	NA	Unknown	16.7981	16.8514	18.5191	18.7442	17.777	15.0273	14.557	18.6482	19.3951	20.1923	20.2828	19.9436	19.5416	18.0001	14.9929	15.4833	-2.59702	-3.34097	-1.76371	-1.19945	-1.76463	-2.97278	-0.435891	3.16486	4.00321	5.60737	2.3042	1.31522	2.30594	4.81111	0.336099	5.22662	1	1	1	0	1	1	0	1
4667	439.155	8.37361	Positive	NA	Unknown	11.0259	17.2881	18.3683	17.9203	17.0157	14.1261	16.1214	12.6436	15.5722	21.0041	21.6695	20.79	19.2644	17.7641	18.7776	5.37348e-14	-4.54632	-3.71603	-3.30119	-2.86968	-2.24876	-3.63795	-2.65622	12.6436	7.04658	5.47933	4.68701	3.86969	2.73695	5.33023	3.47239	18.3354	1	1	1	1	1	1	1	1
4669	181.084	7.03992	Positive	NA	Unknown	19.0759	18.8636	19.6078	19.8402	20.0543	19.7465	20.4907	20.3634	21.4191	20.903	20.5005	21.0942	20.7639	19.8805	19.6949	18.8036	-2.34319	-2.03935	-0.892713	-1.25403	-0.709628	-0.134017	0.795872	1.55988	4.88795	4.04848	1.23193	2.01741	0.889873	0.113311	1.04578	2.7703	1	1	0	1	0	0	0	1
4670	265.037	0.978973	Positive	NA	Unknown	20.3326	20.8763	21.3396	20.2567	20.0017	19.2243	16.2383	11.8034	19.3246	19.6465	19.3542	19.4037	19.5879	18.43	15.7141	12.5916	1.00802	1.22977	1.98535	0.852971	0.413841	0.794318	0.524198	-0.788246	0.801685	1.05927	2.1179	0.638243	0.254228	0.580133	0.339568	0.574235	0	0	1	0	0	0	0	0
4672	114.003	0.584255	Positive	NA	Unknown	16.5659	15.2847	17.4911	16.883	18.6798	19.6018	19.3009	15.0698	15.687	17.7575	18.5299	17.8537	18.8207	17.1992	18.6489	15.9224	0.878898	-2.47281	-1.03877	-0.970706	-0.140945	2.40251	0.652002	-0.852563	0.474845	2.01604	0.591826	0.540878	0.0573599	1.93297	0.325042	0.456478	0	1	0	0	0	0	0	0
4673	312.105	7.42095	Positive	NA	Unknown	21.7389	22.3855	22.3908	21.3379	19.9172	18.0809	15.5153	12.6057	19.8504	20.2718	20.8991	20.1435	18.9721	16.0365	12.3999	3.77516	1.88854	2.11372	1.49171	1.19445	0.945132	2.04441	3.1154	8.83058	0.67119	0.782947	0.490413	0.368831	0.2761	0.747855	1.35501	5.88741	0	0	0	0	0	0	0	1
4675	169.025	2.25463	Positive	NA	Unknown	21.857	22.1782	22.1302	21.1646	19.3586	18.2058	18.6645	13.6919	22.65	23.165	22.9355	21.6977	20.1735	18.8137	15.2436	15.5705	-0.792979	-0.986813	-0.805379	-0.533139	-0.814913	-0.60791	3.42082	-1.87861	0.373269	0.494232	0.380655	0.229606	0.386367	0.268775	2.85423	1.19619	0	0	0	0	0	0	1	0
4677	144.047	4.46429	Positive	NA	Unknown	19.8521	21.4108	20.9578	22.2836	22.8578	22.542	22.3227	19.8636	18.9252	20.6099	21.1629	22.6943	22.3093	21.5065	16.3276	12.9618	0.926963	0.800983	-0.205144	-0.410661	0.548515	1.03557	5.99514	6.9018	0.319307	0.267048	0.0579159	0.123051	0.170837	0.36664	4.23428	5.1169	0	0	0	0	0	0	1	1
4678	262.163	6.73181	Positive	NA	Unknown	18.1595	19.0679	19.3134	17.8563	16.7077	18.4165	17.8496	17.9037	19.0525	20.4006	21.1685	21.0256	19.6811	19.9437	17.4346	16.5422	-0.893026	-1.3327	-1.8551	-3.16931	-2.97337	-1.52726	0.414994	1.36143	0.472731	0.808912	1.29103	2.81082	2.56314	0.9785	0.184795	0.833168	0	0	0	1	1	0	0	0
4679	180.101	8.24698	Positive	NA	Unknown	13.412	14.6673	13.7004	16.2293	16.9568	15.181	14.2857	17.3165	14.1921	17.5237	19.4422	21.1463	20.0589	20.5564	19.6953	18.8835	-0.780107	-2.85641	-5.74179	-4.91705	-3.10205	-5.37546	-5.40956	-1.56696	0.34137	2.02857	5.40775	4.39949	2.2878	4.95934	5.00108	0.856673	0	1	1	1	1	1	1	0
4680	305.016	2.23309	Positive	NA	Unknown	22.6118	22.6438	21.9451	21.0364	20.3698	18.7313	14.8089	16.8636	20.2581	20.6396	20.7416	20.9677	20.3972	17.5244	14.3408	15.9522	2.35365	2.00424	1.20342	0.0687756	-0.0273796	1.20689	0.468091	0.911372	3.02497	2.39833	1.14432	0.0381553	0.0148151	1.14903	0.324188	0.774631	1	1	0	0	0	0	0	0
4681	429.207	9.03072	Positive	NA	Unknown	22.0252	22.3247	22.2162	21.8347	21.5593	21.4281	20.0906	15.1208	21.1856	20.8427	21.2827	21.7597	21.1663	20.4624	17.9053	10.5649	0.83958	1.482	0.933455	0.07496	0.39307	0.9657	2.18533	4.5559	0.809962	1.82473	0.938936	0.0470514	0.300942	0.984896	3.20358	8.29495	0	0	0	0	0	0	1	1
4683	466.19	6.96956	Positive	NA	Unknown	15.4564	16.2949	16.4956	15.615	16.5905	15.4761	12.917	6.88338e-15	18.7011	21.1254	21.6047	21.0698	19.5426	18.8837	16.6726	-3.57492e-14	-3.24463	-4.83048	-5.10909	-5.45475	-2.95207	-3.40762	-3.75557	4.26326e-14	4.19735	7.01841	7.50071	8.08906	3.68177	4.48752	5.11029	0	1	1	1	1	1	1	1	0
4688	208.044	1.21376	Positive	NA	Unknown	15.5777	18.1377	17.7955	18.7614	18.5985	17.9056	14.2137	-8.88178e-15	20.8012	20.4921	19.7512	20.3654	20.1042	18.3807	15.5755	8.13328	-5.22355	-2.35442	-1.9557	-1.60396	-1.5057	-0.475131	-1.36181	-8.13328	2.31782	0.741018	0.576702	0.444758	0.410114	0.105341	0.36114	4.34647	1	0	0	0	0	0	0	1
4696	125.533	1.33856	Positive	NA	Unknown	20.8738	20.499	20.8856	19.3925	16.1539	15.6596	13.9619	17.9378	21.3858	20.8738	21.0821	20.4121	18.9866	18.0062	15.9159	16.5962	-0.511983	-0.374721	-0.196459	-1.01969	-2.83269	-2.3466	-1.954	1.34159	0.298236	0.205095	0.0987172	0.728224	3.14833	2.39971	1.83761	1.06778	0	0	0	0	1	1	0	0
4700	422.142	7.15642	Positive	NA	Unknown	17.6548	19.7414	20.376	22.2262	20.3614	17.4506	-3.55271e-15	3.39693	17.7132	16.8675	20.4501	21.9781	21.042	19.5743	15.9655	2.30926e-14	-0.0584159	2.8739	-0.0740518	0.248082	-0.68065	-2.12366	-15.9655	3.39693	0.0126826	1.0804	0.0161388	0.0563841	0.170934	0.708702	10.5786	1.37308	0	0	0	0	0	0	1	0
4701	117.002	1.12192	Positive	NA	Unknown	19.0717	18.7902	20.6685	20.1565	20.3737	18.9849	19.082	17.4981	19.697	19.4362	17.5675	18.8841	17.9187	19.9278	19.3493	18.2876	-0.625317	-0.646021	3.10104	1.27231	2.45501	-0.942892	-0.267262	-0.7895	0.322807	0.336131	2.95096	0.819313	2.10315	0.546013	0.119391	0.433183	0	0	1	0	1	0	0	0
4704	221.043	9.64893	Positive	NA	Unknown	15.7397	23.9349	23.275	24.6056	24.7275	24.2642	23.6427	21.9583	9.5652	13.5685	17.5064	19.6749	20.2263	17.1031	17.3728	-5.9508e-14	6.17447	10.3664	5.76854	4.9307	4.50115	7.1611	6.26993	21.9583	1.12149	2.37722	1.01825	0.817394	0.721054	1.38756	1.14631	6.62799	0	1	0	0	0	0	0	1
4705	282.095	8.66744	Positive	NA	Unknown	17.6506	18.2702	20.9172	19.9653	17.1366	15.399	14.1726	12.3013	17.0845	20.7426	21.7834	19.8664	16.3145	15.0115	16.0727	12.3722	0.566093	-2.47238	-0.866202	0.0989032	0.822169	0.387503	-1.90013	-0.0708973	0.312097	2.36054	0.536977	0.0442745	0.501389	0.19801	1.60831	0.0313136	0	1	0	0	0	0	0	0
4707	134.533	1.78567	Positive	NA	Unknown	20.2088	20.4513	19.6406	20.2298	20.7304	19.7318	18.9202	19.9739	20.2144	20.4026	20.0226	20.9996	20.6875	19.7253	20.3266	19.9221	-0.00556296	0.048637	-0.382004	-0.769799	0.0429031	0.00642077	-1.40646	0.0517865	0.00516534	0.0472425	0.504754	1.32851	0.0414265	0.00596726	3.18418	0.0504654	0	0	0	0	0	0	1	0
4709	228.064	8.39116	Positive	NA	Unknown	10.9636	16.7911	16.6446	16.7698	16.7197	15.1975	15.3689	15.9615	12.8487	19.9767	21.0608	20.3311	18.9414	18.1339	17.0538	3.60895	-1.88507	-3.18558	-4.41621	-3.56127	-2.22163	-2.93645	-1.68495	12.3525	0.735938	1.54748	2.49042	1.82019	0.924127	1.37526	0.631914	9.44648	0	0	1	0	0	0	0	1
4711	156.101	6.3841	Positive	NA	Unknown	16.9207	16.896	18.228	17.5353	19.2659	18.7815	18.8173	19.0643	17.5365	19.5043	19.8552	20.0056	19.8717	20.4314	19.7322	19.2157	-0.615729	-2.60825	-1.62718	-2.47028	-0.605811	-1.64988	-0.914873	-0.151404	0.320135	2.32656	1.1731	2.14946	0.313774	1.19659	0.530782	0.0649286	0	1	0	1	0	0	0	0
4715	211.541	7.448	Positive	NA	Unknown	14.9484	14.5533	14.9362	15.3257	17.6654	19.1838	20.6007	10.6911	19.7977	19.3446	19.2411	19.8109	19.9577	20.4356	18.0613	6.97436	-4.84928	-4.79122	-4.3049	-4.48517	-2.29224	-1.25177	2.53935	3.7167	2.79559	2.74744	2.35259	2.49708	0.947289	0.420175	1.09488	1.89901	1	1	1	1	0	0	0	0
4720	194.153	9.06687	Positive	NA	Unknown	12.7619	16.1361	15.8179	13.5717	0	10.3349	10.4357	15.993	18.4276	21.5852	20.9061	18.664	14.8076	12.0685	8.28664	7.04964	-5.66569	-5.4491	-5.08821	-5.09226	-14.8076	-1.73352	2.14911	8.94337	1.61273	1.52392	1.37993	1.38152	6.18373	0.323302	0.423831	3.12833	0	0	0	0	1	0	0	1
4721	213.035	6.64881	Positive	NA	Unknown	19.0342	22.831	23.1365	21.2083	18.6877	18.9968	19.33	17.7932	19.7645	21.3378	20.8679	19.0676	19.4166	19.2203	16.9963	12.5407	-0.730256	1.49322	2.2686	2.14072	-0.728985	-0.22341	2.33375	5.25252	0.507424	1.36469	2.50785	2.30503	0.506268	0.122174	2.61289	7.6997	0	0	1	1	0	0	1	1
4723	155.032	1.76812	Positive	NA	Unknown	18.7804	18.7082	17.6914	20.0218	20.436	20.2242	19.4654	19.3577	15.0809	16.7062	18.3218	20.9317	20.8387	20.7738	20.2103	20.8155	3.69952	2.00197	-0.630349	-0.909845	-0.402748	-0.549655	-0.744856	-1.45785	5.79907	2.4816	0.488326	0.79955	0.277824	0.409222	0.608924	1.56337	1	1	0	0	0	0	0	0
4724	212.022	6.08891	Positive	NA	Unknown	19.7989	20.9951	21.5074	20.555	19.6303	17.3128	13.9507	19.4598	19.8527	21.1791	21.2642	20.7121	20.1407	18.1822	15.6977	17.1986	-0.0537873	-0.184023	0.243212	-0.157117	-0.510414	-0.869361	-1.74694	2.26124	0.0405016	0.15347	0.211993	0.128365	0.533452	1.10882	3.04655	4.37262	0	0	0	0	0	0	1	1
4725	160.042	6.33804	Positive	NA	Unknown	19.123	19.5213	20.5054	20.2534	19.9389	19.2584	18.6948	12.5664	19.4457	20.1929	20.4224	20.3287	20.0867	18.7094	14.6278	10.1227	-0.322682	-0.67162	0.0829868	-0.0752917	-0.147857	0.54903	4.06701	2.44376	0.173243	0.421405	0.0395726	0.0357614	0.0728709	0.326878	5.21058	2.56189	0	0	0	0	0	0	1	1
4730	205.613	10.5337	Positive	NA	Unknown	16.2341	18.0666	17.7303	17.7923	18.5065	19.6992	20.6255	21.357	20.283	20.5403	20.4381	18.0209	16.0202	16.9938	19.2004	19.8148	-4.04887	-2.47372	-2.70783	-0.2286	2.4863	2.70544	1.42503	1.54224	3.86491	1.90323	2.17157	0.092416	1.91736	2.16878	0.862881	0.963862	1	0	1	0	0	1	0	0
4733	219.1	8.72956	Positive	NA	Unknown	19.7996	20.316	20.6435	20.3402	20.4809	19.6653	20.5431	18.8007	20.2487	20.1944	20.3792	20.3983	19.8224	19.0246	17.0519	13.1103	-0.449132	0.121566	0.264274	-0.0581037	0.658501	0.640694	3.49117	5.69036	0.432495	0.0931647	0.22485	0.0424033	0.718165	0.691826	7.30011	12.2097	0	0	0	0	0	0	1	1
4738	264.572	6.95416	Positive	NA	Unknown	14.4091	15.5267	16.0857	15.1001	16.1848	14.8831	12.5595	3.5256	18.401	20.4364	20.8199	20.3573	19.3048	18.4669	15.9699	9.10383e-15	-3.99196	-4.90965	-4.73421	-5.2572	-3.11991	-3.58382	-3.41042	3.5256	2.10144	2.83761	2.69248	3.13008	1.46765	1.79551	1.67033	1.75314	1	1	1	1	0	0	0	0
4740	133.099	2.19964	Positive	NA	Unknown	16.0644	18.3155	16.1811	17.2386	18.2665	18.6345	16.5096	10.2498	19.6139	21.0264	21.1241	21.0131	20.1607	19.0568	18.4318	12.3769	-3.54955	-2.7109	-4.94301	-3.77453	-1.89421	-0.422381	-1.92224	-2.12707	3.56682	2.42342	5.58245	3.88693	1.43797	0.200852	1.4689	1.70178	1	1	1	1	0	0	0	0
4741	229.048	8.42804	Positive	NA	Unknown	18.967	15.9749	15.4165	14.2411	14.6482	12.2389	12.9203	13.4765	21.5131	20.5456	19.0148	17.7938	13.8013	13.8531	7.23418	7.15485	-2.54611	-4.57065	-3.59826	-3.55269	0.846854	-1.61422	5.6861	6.32166	0.73169	1.67926	1.1883	1.16683	0.1833	0.400852	2.30882	2.69252	0	0	0	0	0	0	1	1
4743	313.088	4.23215	Positive	NA	Unknown	13.1423	15.4229	14.2671	20.5196	22.2897	22.4712	22.6673	21.6605	7.85279	13.1484	15.4518	21.0657	21.832	22.218	22.031	21.644	5.28953	2.27447	-1.18469	-0.546087	0.457736	0.25317	0.636321	0.0165193	2.40534	0.719417	0.308601	0.12472	0.102552	0.0542018	0.148172	0.00335036	1	0	0	0	0	0	0	0
4746	191.03	7.56191	Positive	NA	Unknown	15.89	19.9794	21.8552	18.7483	19.7324	19.1433	20.0549	19.1418	19.9214	19.8204	20.0549	18.0895	20.11	18.2996	18.9432	16.7926	-4.03131	0.158967	1.80037	0.658829	-0.377598	0.843699	1.11168	2.34922	4.07374	0.0653657	1.27612	0.330293	0.169926	0.451808	0.650457	1.87757	1	0	0	0	0	0	0	0
4748	125.533	2.16002	Positive	NA	Unknown	20.8563	20.6645	20.621	19.4672	17.6931	17.4639	18.8812	18.1444	21.164	20.7395	20.8671	20.325	19.1492	17.899	17.5408	17.1568	-0.307699	-0.0749558	-0.246077	-0.857819	-1.45608	-0.435158	1.3404	0.987622	0.298527	0.0605155	0.227945	1.16766	2.51658	0.462057	2.23119	1.43019	0	0	0	0	1	0	1	0
4749	200.2	8.72085	Positive	NA	Unknown	11.3768	15.4811	15.6863	15.3201	3.57988	4.26894	-1.77636e-15	-5.32907e-15	16.4471	21.1195	21.0623	17.8427	10.2652	16.5035	19.9253	15.3489	-5.07034	-5.6384	-5.376	-2.52259	-6.68529	-12.2346	-19.9253	-15.3489	0.879967	1.02159	0.955171	0.349389	1.30291	3.13082	6.06123	4.30054	0	0	0	0	0	1	1	1
4756	491.306	12.2398	Positive	NA	Unknown	8.84311	14.8033	4.12076	7.56208	10.3718	19.7338	18.6184	14.542	0	13.9926	16.6103	15.5571	21.7881	20.9933	20.7159	13.0747	8.84311	0.810778	-12.4895	-7.99498	-11.4163	-1.2595	-2.09744	1.46737	2.16041	0.100767	3.55076	1.86492	3.12592	0.165164	0.302423	0.197135	1	0	1	0	1	0	0	0
4758	149.132	9.0304	Positive	NA	Unknown	21.2114	21.1953	21.4222	21.0439	20.9416	20.9407	19.7374	17.2429	19.889	20.1221	20.87	21.5063	20.9454	20.2297	17.7388	12.6475	1.32243	1.07323	0.552169	-0.462443	-0.00387877	0.711019	1.99854	4.59548	1.23563	0.918734	0.378843	0.303725	0.00198628	0.524895	2.25111	6.99642	0	0	0	0	0	0	1	1
4760	232.996	1.52006	Positive	NA	Unknown	22.4872	21.9622	22.0054	21.2512	20.8814	20.543	18.3448	18.6053	20.8489	20.8706	20.4469	20.4039	20.1201	19.3089	17.8151	18.264	1.63836	1.09159	1.55855	0.847345	0.76133	1.23408	0.529736	0.341294	7.55958	4.52187	7.12691	3.17766	2.72502	5.32291	1.60739	0.858046	1	1	1	0	0	1	0	0
4764	121.064	6.71953	Positive	NA	Unknown	21.4278	21.3675	21.4029	20.8716	20.6991	20.4006	18.0055	15	20.249	20.6456	21.1107	19.206	18.951	18.2868	16.3953	15.1966	1.17872	0.721885	0.292125	1.66565	1.7481	2.11375	1.61016	-0.196588	1.50634	0.752049	0.23636	2.49252	2.67322	3.50736	2.37279	0.149089	0	0	0	1	1	1	1	0
4765	446.986	1.06706	Positive	NA	Unknown	18.609	18.6159	19.7058	19.7041	19.0225	19.4543	18.5388	13.7661	18.6291	18.3767	17.1685	18.816	19.943	19.774	19.0279	15.2442	-0.020106	0.239174	2.53732	0.888089	-0.920563	-0.319674	-0.489066	-1.47811	0.00754491	0.0983018	2.0076	0.463744	0.485907	0.135685	0.221625	0.92246	0	0	1	0	0	0	0	0
4769	222.169	7.64791	Positive	NA	Unknown	22.1163	23.72	21.6533	23.0909	22.6709	22.0589	22.0572	12.2958	18.3386	20.2421	19.665	21.9219	20.6748	21.1328	20.6794	10.5508	3.77765	3.47781	1.98826	1.16904	1.99606	0.926077	1.37784	1.74502	2.51993	2.23444	0.996117	0.484053	1.00164	0.359331	0.601367	0.829824	1	1	0	0	0	0	0	0
4771	118.01	1.91282	Positive	NA	Unknown	12.4663	12.5344	13.581	16.8308	18.9715	18.1741	19.7697	20.946	12.1521	12.0189	12.372	18.0505	19.4218	20.509	21.2146	21.5972	0.314217	0.515525	1.20906	-1.2197	-0.450285	-2.3349	-1.4449	-0.651265	0.223846	0.411422	1.31634	1.33307	0.346787	3.41387	1.70446	0.557661	0	0	0	0	0	1	0	0
4772	595.142	8.12642	Positive	NA	Unknown	24.6699	24.6587	24.6301	22.7675	22.349	22.3244	19.8994	10.7046	21.2166	19.1382	18.7984	15.6907	17.5665	13.6845	12.7551	8.01509	3.45331	5.52046	5.83168	7.07678	4.78241	8.63987	7.14431	2.68951	1.14455	2.25999	2.44767	3.23416	1.83318	4.27457	3.27814	0.805304	0	1	1	1	0	1	1	0
4773	324.106	9.09662	Positive	NA	Unknown	8.74017	12.0473	7.78825	11.15	10.9969	6.84325	11.9026	10.9164	20.5477	21.1781	20.7671	18.4616	10.5657	6.85612	6.82445	-3.75255e-14	-11.8076	-9.13078	-12.9789	-7.3116	0.431271	-0.0128713	5.07817	10.9164	3.39717	2.34687	3.87936	1.69748	0.0525018	0.00148372	1.00483	3.03799	1	1	1	0	0	0	0	1
4782	170.014	1.03471	Positive	NA	Unknown	19.6987	20.0439	19.7534	19.7708	18.7867	17.3578	15.5768	16.6207	20.1867	20.2673	19.924	19.8121	18.9977	16.4647	15.7043	18.9331	-0.487913	-0.223411	-0.170593	-0.0412956	-0.210991	0.893081	-0.127497	-2.31244	0.358929	0.141913	0.10502	0.0234815	0.133048	0.796166	0.0764716	3.12386	0	0	0	0	0	0	0	1
4784	163.044	1.43783	Positive	NA	Unknown	19.0918	22.6763	20.2615	20.7061	19.8127	18.5641	19.1336	14.4752	14.5175	21.5464	12.4109	20.9362	18.1146	18.6146	15.0275	-3.95239e-14	4.57431	1.12996	7.85057	-0.230131	1.69815	-0.0504795	4.10608	14.4752	0.686413	0.123885	1.46956	0.022913	0.197265	0.00492694	0.593458	3.56099	0	0	0	0	0	0	0	1
4785	473.103	8.37403	Positive	NA	Unknown	19.9718	20.5745	21.1795	20.5879	19.9952	18.7946	18.7128	14.0878	21.1893	20.3567	20.5765	20.1512	19.7678	17.4548	15.5837	1.9984e-14	-1.2175	0.217748	0.603002	0.4367	0.227476	1.33987	3.1291	14.0878	1.22082	0.136839	0.466353	0.310146	0.143766	1.40142	4.71239	20.4833	0	0	0	0	0	0	1	1
4786	244.095	8.10711	Positive	NA	Unknown	3.89569	12.592	18.5148	18.0746	18.912	19.6022	15.8688	12.5373	7.00216	19.3043	20.3655	19.1095	18.7842	20.3907	19.9979	17.0106	-3.10647	-6.71224	-1.85066	-1.0349	0.127806	-0.788475	-4.12911	-4.4733	0.914565	2.77986	0.455044	0.221811	0.0230723	0.161608	1.37168	1.54036	0	1	0	0	0	0	0	0
4788	192.049	2.67078	Positive	NA	Unknown	21.3271	21.4428	21.9641	21.0869	20.8385	20.8494	22.0671	20.1572	20.6371	21.1779	22.0215	21.7684	21.373	20.626	19.4198	16.919	0.690017	0.264944	-0.0573759	-0.681462	-0.534582	0.223397	2.64738	3.23814	0.818476	0.238874	0.0440164	0.804466	0.578597	0.195289	5.50052	7.06983	0	0	0	0	0	0	1	1
4789	225.119	10.2358	Positive	NA	Unknown	7.55737	13.6028	14.8738	13.5209	14.8732	17.4652	19.5482	16.2876	20.9757	20.126	19.6088	15.0136	13.6355	14.1553	13.5006	14.3357	-13.4183	-6.52326	-4.73497	-1.49272	1.23775	3.30986	6.0476	1.95197	7.78346	3.01499	1.89392	0.385357	0.305036	1.12815	2.70373	0.545272	1	1	0	0	0	0	1	0
4790	141.065	1.18889	Positive	NA	Unknown	19.1681	17.5709	18.3408	18.1679	17.9679	19.2743	18.3026	18.7679	21.0536	21.5525	21.083	22.025	20.5283	21.7013	20.9584	18.1314	-1.88545	-3.98162	-2.74217	-3.8571	-2.56046	-2.42696	-2.65585	0.636518	1.73774	5.01985	2.99418	4.81224	2.71279	2.51043	2.85971	0.389998	0	1	1	1	1	1	1	0
4794	197.078	3.79885	Positive	NA	Unknown	20.9695	21.48	21.7891	21.1474	20.5461	20.5382	20.9067	20.3873	20.6987	21.6782	21.3188	20.7793	20.2485	19.8943	19.582	19.352	0.270833	-0.198111	0.470244	0.368115	0.297583	0.643931	1.32467	1.03531	0.278314	0.191826	0.560841	0.407847	0.31235	0.860036	2.42913	1.69607	0	0	0	0	0	0	1	0
4795	145.53	0.920682	Positive	NA	Unknown	18.405	17.5976	18.1349	18.0357	18.3071	19.4951	20.1436	20.5508	19.1534	18.2958	18.4611	19.4976	19.7425	20.2999	20.2898	20.0923	-0.748404	-0.698142	-0.326249	-1.46192	-1.43537	-0.804832	-0.14618	0.458506	1.02003	0.924884	0.337789	2.68769	2.61738	1.131	0.131111	0.522168	0	0	0	1	1	0	0	0
4798	239.088	7.42025	Positive	NA	Unknown	19.7666	19.8975	20.35	19.4578	18.785	19.7984	20.8617	18.703	20.2179	20.0663	20.3384	20.7486	19.6028	18.6076	18.4573	16.3728	-0.451315	-0.168845	0.0115829	-1.29081	-0.817809	1.19074	2.40441	2.33018	0.31093	0.0996482	0.00622454	1.27018	0.670546	1.13153	3.13085	2.99346	0	0	0	0	0	0	1	1
4800	433.232	13.4005	Positive	NA	Unknown	13.9113	12.0535	14.6647	16.3368	12.8328	21.2114	17.4327	14.7933	23.2782	24.9049	25.2883	23.7245	21.0758	22.5039	17.8477	11.0416	-9.36697	-12.8514	-10.6236	-7.38773	-8.24305	-1.29249	-0.414933	3.75162	4.68746	7.01539	5.53333	3.37595	3.93656	0.304354	0.082753	1.26544	1	1	1	1	1	0	0	0
4804	422.2	8.58605	Positive	NA	Unknown	19.986	20.3543	20.6532	19.7445	18.9246	18.5721	18.0375	15.3115	19.8796	20.0105	20.4194	19.7262	18.46	16.9396	16.534	3.39777	0.10637	0.343784	0.233809	0.0182796	0.464594	1.63255	1.50351	11.9137	0.0298614	0.103653	0.0682277	0.00499367	0.145084	0.685333	0.613235	10.01	0	0	0	0	0	0	0	1
4806	184.096	6.52657	Positive	NA	Unknown	17.3999	20.0264	19.6956	21.4748	21.8426	20.9226	19.8706	19.9116	16.2215	17.4392	19.6155	22.0003	22.0624	20.9712	18.5553	15.3235	1.17845	2.58716	0.0800824	-0.525504	-0.219829	-0.048623	1.31534	4.58812	0.684301	2.09648	0.0311525	0.244393	0.0906518	0.0186626	0.795471	4.72182	0	1	0	0	0	0	0	1
4810	201.036	0.933484	Positive	NA	Unknown	20.2195	21.9902	21.8393	21.8473	21.2903	21.1666	21.7623	21.5901	16.6849	18.5295	19.8448	19.5418	20.6259	20.3035	19.6184	21.0742	3.53462	3.46068	1.99457	2.30548	0.66437	0.863022	2.14393	0.515924	3.28741	3.18999	1.43412	1.77025	0.324932	0.452441	1.59255	0.23888	1	1	0	0	0	0	0	0
4813	190.085	6.26353	Positive	NA	Unknown	11.1483	12.361	18.4518	13.3122	15.9631	17.1693	12.6862	3.41693	17.194	22.0074	21.34	17.4614	16.936	17.1094	15.4372	7.2473	-6.04576	-9.64637	-2.88814	-4.14915	-0.972866	0.0598451	-2.751	-3.83036	2.52906	4.87065	0.872527	1.46194	0.215958	0.0110888	0.815495	1.30246	1	1	0	0	0	0	0	0
4814	208.063	2.42741	Positive	NA	Unknown	18.7172	19.1281	19.2381	17.7239	17.1649	17.1912	15.3566	16.332	20.3928	20.7106	21.2364	20.4887	19.3779	18.4302	17.3353	15.0016	-1.67558	-1.58252	-1.99831	-2.76471	-2.213	-1.23901	-1.97876	1.33044	1.75702	1.61673	2.27161	3.62047	2.63446	1.13586	2.23931	1.2578	0	0	1	1	1	0	1	0
4815	273.094	6.40201	Positive	NA	Unknown	20.9428	19.2514	13.3256	14.2849	16.1245	14.4025	18.8873	15.1218	22.6398	21.0503	15.3514	15.4621	15.9365	17.7247	18.5131	15.1839	-1.69702	-1.79892	-2.02576	-1.17719	0.187924	-3.32227	0.374239	-0.0621583	1.20817	1.31379	1.56019	0.723446	0.0800208	3.19798	0.172306	0.0250512	0	0	0	0	0	1	0	0
4817	248.148	6.45094	Positive	NA	Unknown	11.9888	13.6735	14.6973	16.4738	15.0186	13.7119	15.8869	15.7873	14.7747	21.0711	22.5078	21.6019	19.106	21.2279	17.7496	17.5166	-2.78581	-7.39762	-7.81052	-5.12813	-4.08736	-7.51598	-1.86273	-1.72932	1.41007	5.61062	6.0126	3.41248	2.4637	5.72604	0.797091	0.719725	0	1	1	1	1	1	0	0
4820	157.1	8.91905	Positive	NA	Unknown	19.1986	18.898	17.9214	17.6021	16.2372	15.469	13.1737	10.304	21.0679	21.0879	20.1471	19.1389	16.0751	13.4389	3.52169	-5.13478e-15	-1.86929	-2.18983	-2.2257	-1.53678	0.162138	2.03004	9.65199	10.304	0.709883	0.883198	0.903477	0.545649	0.0412828	0.794995	7.00259	7.56599	0	0	0	0	0	0	1	1
4822	197.005	2.64865	Positive	NA	Unknown	21.2012	21.3695	21.9056	20.5091	20.8083	20.8661	22.0225	20.139	20.6189	21.2838	21.863	21.7004	21.3003	20.65	19.3796	16.4421	0.582283	0.085636	0.0426515	-1.19127	-0.491958	0.216111	2.64289	3.69687	0.505914	0.0550982	0.0266497	1.36125	0.406872	0.151503	4.27762	6.61773	0	0	0	0	0	0	1	1
4824	118.026	2.03655	Positive	NA	Unknown	20.1508	20.1624	19.7363	20.0456	19.6776	19.0591	19.9349	18.0714	19.9738	19.5142	19.3394	18.7896	19.1652	18.3135	20.6295	19.5401	0.177066	0.648155	0.396947	1.25602	0.51244	0.74563	-0.694523	-1.46868	0.127967	0.623033	0.330647	1.57962	0.457044	0.753654	0.683997	1.98404	0	0	0	0	0	0	0	1
4827	352.158	8.37945	Positive	NA	Unknown	19.0671	19.3592	19.6729	18.8484	16.984	16.1263	11.8925	7.10543e-15	20.0712	20.5229	21.6749	20.64	17.9734	16.6151	16.1794	13.8652	-1.0041	-1.16363	-2.00195	-1.79165	-0.989364	-0.488798	-4.28688	-13.8652	0.455435	0.55238	1.16798	0.997553	0.44682	0.188636	3.51179	13.665	0	0	0	0	0	0	1	1
4828	183.03	7.79249	Positive	NA	Unknown	16.1102	13.8386	18.4797	19.0459	18.5368	18.1305	18.3884	12.1273	19.8018	19.5653	19.7399	19.7472	19.3076	18.2392	15.343	3.3169	-3.69163	-5.72672	-1.26022	-0.701323	-0.770827	-0.108729	3.04538	8.81042	2.00838	3.7756	0.449149	0.217927	0.243859	0.0287079	1.51741	6.65712	1	1	0	0	0	0	0	1
4832	263.125	8.39979	Positive	NA	Unknown	20.6991	20.7115	20.5758	19.7251	19.3276	18.8605	18.4183	15.3338	20.5866	20.0974	20.1242	19.6601	18.9311	17.205	16.328	14.4254	0.112491	0.614061	0.451602	0.0649821	0.396533	1.65553	2.09035	0.908426	0.0864014	0.660592	0.44029	0.0481013	0.373051	2.72089	3.79132	1.13943	0	0	0	0	0	1	1	0
4835	298.148	6.71785	Positive	NA	Unknown	17.4505	18.5342	19.2636	19.3719	19.8055	21.8177	21.4466	18.3691	17.0865	17.5858	18.4337	18.7918	19.4102	20.3696	19.8128	15.863	0.364051	0.94834	0.829952	0.580073	0.395328	1.44818	1.63374	2.50605	0.281609	0.99084	0.822249	0.507208	0.311543	1.82292	2.17344	4.00757	0	0	0	0	0	0	1	1
4836	149.059	6.54103	Positive	NA	Unknown	19.0362	18.4666	18.5178	16.6023	17.0234	16.7446	14.2351	14.2597	20.6667	22.3288	21.0499	19.0112	18.0445	16.7509	16.4794	14.2987	-1.63048	-3.86212	-2.53207	-2.40887	-1.02108	-0.00628538	-2.24435	-0.0389492	1.62085	5.47995	3.07133	2.85917	0.831472	0.00315361	2.58147	0.0199106	0	1	1	1	0	0	1	0
4837	230.101	2.26866	Positive	NA	Unknown	15.0761	19.4727	18.6954	21.5681	22.9957	21.1731	19.0895	15.7306	9.06911	16.0067	16.1503	21.6304	21.5047	19.4203	16.8656	13.1308	6.00695	3.46598	2.54508	-0.0622956	1.49098	1.75278	2.22396	2.59983	2.02596	0.918146	0.601337	0.00996311	0.302938	0.370489	0.503017	0.618739	1	0	0	0	0	0	0	0
4840	321.059	8.71817	Positive	NA	Unknown	25.9821	26.051	23.8155	21.521	20.4303	19.7916	18.9264	16.9401	21.8577	20.4106	19.68	17.1037	16.8826	12.809	11.0357	3.81472	4.12445	5.64043	4.13552	4.41727	3.54775	6.98263	7.89065	13.1254	1.92144	3.02589	1.92897	2.12365	1.54293	4.08677	4.82448	8.96222	0	1	0	1	0	1	1	1
4842	295.225	10.542	Positive	NA	Unknown	15.8659	17.8993	17.5687	17.7021	18.2546	19.482	20.2175	21.2377	20.0723	20.2716	20.1469	17.7402	16.14	16.908	18.6487	19.6351	-4.20637	-2.37227	-2.57816	-0.0381129	2.1146	2.574	1.56881	1.60262	4.0348	1.77194	2.00067	0.014146	1.49901	1.99596	0.977472	1.00733	1	0	1	0	0	1	0	0
4847	385.218	9.82837	Positive	NA	Unknown	21.7134	21.7782	21.6816	21.4959	20.1555	18.2397	19.7774	16.6949	22.2829	22.6538	22.0003	22.1022	20.1996	18.5581	15.5445	11.5185	-0.569478	-0.875664	-0.318684	-0.606284	-0.0441389	-0.31838	4.2329	5.17639	0.305272	0.527818	0.153701	0.329841	0.01878	0.153534	4.86479	6.30576	0	0	0	0	0	0	1	1
4848	154.047	2.22439	Positive	C5H9NO3	N-ACETYL-L-ALANINE	20.6443	20.8745	19.9924	20.8632	20.4881	19.326	18.8895	19.4594	22.1111	21.5113	21.2737	22.0085	21.6502	20.9715	20.4946	19.2064	-1.46684	-0.636774	-1.28132	-1.14529	-1.16216	-1.64553	-1.60515	0.253025	2.11035	0.645103	1.7326	1.47175	1.5033	2.49469	2.40628	0.202449	1	0	0	0	0	1	1	0
4849	193.075	9.91844	Positive	NA	Unknown	18.8646	19.6021	19.6527	18.0345	15.9418	12.8747	14.2741	15.0815	20.0215	20.8074	20.5354	18.9659	18.3992	16.4034	12.9563	7.78849	-1.15696	-1.20531	-0.882645	-0.931361	-2.4574	-3.52875	1.31784	7.29299	0.346417	0.364659	0.248716	0.265347	0.941594	1.5811	0.408301	4.4708	0	0	0	0	0	0	0	1
4851	205.001	1.51937	Positive	NA	Unknown	22.4465	22.2603	22.0341	21.7527	21.4134	21.0307	20.0026	18.4207	21.3993	21.6568	21.1361	21.4516	20.7691	20.5911	19.3078	19.831	1.04727	0.603571	0.897968	0.301128	0.644285	0.439602	0.694841	-1.41033	2.46229	1.10762	1.96805	0.431171	1.21593	0.711625	1.35555	3.7675	1	0	0	0	0	0	0	1
4852	176.071	8.83301	Positive	NA	Unknown	17.7226	17.3649	14.7351	14.0237	15.7978	13.7884	15.1339	13.586	20.8408	20.9785	19.7886	18.3484	17.0267	16.2782	16.0466	15.6883	-3.11819	-3.61355	-5.05345	-4.32464	-1.22894	-2.48985	-0.912718	-2.1023	3.08301	3.79739	5.9425	4.85304	0.80844	2.22659	0.540634	1.73971	1	1	1	1	0	1	0	0
4853	295.041	2.96857	Positive	NA	Unknown	7.52122	11.6507	10.9865	14.1007	16.6167	14.5422	6.75764	1.33227e-14	11.0666	19.2666	20.2455	21.2721	20.8299	19.3991	11.1984	0	-3.54534	-7.61586	-9.25893	-7.17146	-4.21318	-4.85692	-4.44074	1.33227e-14	0.518115	1.49975	1.99334	1.37472	0.652086	0.791855	0.700316	0	0	0	1	0	0	0	0	0
4854	216.054	2.16371	Positive	NA	Unknown	16.4205	17.2953	17.0337	17.8802	18.9682	18.4444	16.5428	11.5177	19.0038	20.0747	20.1155	20.1313	19.7681	18.9285	19.0006	14.0361	-2.58328	-2.77943	-3.08187	-2.25106	-0.799925	-0.484145	-2.45781	-2.51839	4.24819	4.69152	5.3781	3.50807	0.794478	0.407785	3.96661	4.1023	1	1	1	1	0	0	1	1
4855	319.079	7.58769	Positive	NA	Unknown	21.0748	19.9016	20.9476	21.4066	21.9656	21.4883	18.6975	14.8876	19.0144	19.0095	19.9564	20.9058	20.6947	19.1202	18.9997	12.6951	2.0604	0.892072	0.991239	0.500749	1.27086	2.36811	-0.302127	2.19245	2.56867	0.772747	0.894436	0.361393	1.27264	3.13848	0.196075	2.80994	1	0	0	0	0	1	0	1
4857	395.166	8.89611	Positive	NA	Unknown	21.334	20.9132	20.1204	18.6814	16.1026	13.7094	14.59	12.6926	22.7987	20.8154	18.4232	17.6289	15.8308	12.4754	13.121	10.6555	-1.46469	0.0978409	1.69718	1.05256	0.271892	1.23405	1.46908	2.03715	1.38609	0.0516677	1.71668	0.866547	0.157765	1.08408	1.39211	2.2404	0	0	0	0	0	0	0	1
4859	159.028	2.64957	Positive	NA	Unknown	20.5903	21.8	21.6044	22.2566	21.8505	21.4628	21.8397	23.0256	18.8004	20.487	20.3553	21.0725	20.8525	20.5312	20.0925	19.7359	1.78996	1.313	1.24916	1.18411	0.997963	0.931653	1.74714	3.28968	1.22959	0.794426	0.741771	0.689541	0.548174	0.500755	1.18765	2.97339	0	0	0	0	0	0	0	1
4860	136.033	6.09549	Positive	NA	Unknown	19.7688	21.0541	21.3577	20.4262	19.3973	17.5685	15.0074	19.0188	19.9201	21.185	21.2513	20.5572	19.8979	18.0826	15.9776	17.2656	-0.151307	-0.130864	0.106377	-0.130995	-0.50063	-0.514038	-0.970205	1.75325	0.094589	0.0807778	0.0646641	0.0808657	0.382468	0.3955	0.924674	2.16924	0	0	0	0	0	0	0	1
4861	190.049	7.74492	Positive	C10H7NO3	Kynurenic Acid	17.96	18.4395	19.1356	17.0713	17.9413	18.5261	17.8858	18.5854	20.165	20.6048	20.9501	19.8386	18.8601	16.5416	18.3771	16.7112	-2.20503	-2.1653	-1.8145	-2.76731	-0.918786	1.98443	-0.491269	1.87423	2.18819	2.13096	1.64682	3.03993	0.631215	1.87633	0.283148	1.72635	1	1	0	1	0	0	0	0
4863	404.114	8.57169	Positive	NA	Unknown	18.3631	20.7924	20.4098	19.3727	17.596	17.6088	13.7118	2.4869e-14	17.5935	20.4136	20.2201	17.9378	16.4331	13.8298	7.48086	-7.54952e-15	0.769643	0.378827	0.189716	1.43488	1.16291	3.77907	6.23089	3.24185e-14	0.207518	0.093141	0.0445152	0.446447	0.341977	1.70807	3.51942	0	0	0	0	0	0	0	1	0
4864	219.053	6.58696	Positive	NA	Unknown	22.8072	23.8407	20.2906	21.8424	22.6952	20.6858	21.4867	19.011	19.5314	19.4245	20.3693	21.1214	19.5054	19.2652	20.0501	17.9814	3.27584	4.41618	-0.0786939	0.720949	3.18975	1.42051	1.43663	1.02956	2.72627	4.15915	0.0288985	0.33609	2.62329	0.81971	0.832634	0.530449	1	1	0	0	1	0	0	0
4867	289.1	3.42662	Positive	NA	Unknown	16.8507	7.99361e-15	9.25195	19.1049	20.9621	19.5957	21.3908	19.718	17.4493	3.71514	17.546	20.7586	20.2625	20.1978	20.7872	19.1331	-0.59853	-3.71514	-8.29409	-1.65366	0.699606	-0.602094	0.60361	0.584944	0.0905574	0.835831	2.65478	0.290851	0.107464	0.0911454	0.0913957	0.088321	0	0	1	0	0	0	0	0
4870	307.981	2.25821	Positive	NA	Unknown	20.1647	20.638	19.4665	19.4392	18.9954	18.7557	17.1938	17.4351	20.4887	21.0282	20.8664	20.3073	19.375	18.8735	13.281	16.502	-0.323964	-0.390124	-1.39983	-0.868114	-0.379611	-0.117804	3.91278	0.933089	0.19777	0.246443	1.33697	0.683582	0.238517	0.0642802	5.71548	0.754406	0	0	0	0	0	0	1	0
4879	171.027	2.65171	Positive	NA	Unknown	21.2043	22.0224	21.5607	21.6048	21.5951	21.6252	19.6617	20.4085	18.6127	20.4132	20.6131	21.3465	21.0549	20.1935	17.9951	16.7411	2.59159	1.60914	0.94756	0.258391	0.540221	1.43172	1.66657	3.66737	3.36438	1.68728	0.793284	0.156058	0.37747	1.42397	1.77573	5.40248	1	0	0	0	0	0	0	1
4881	354.174	8.62809	Positive	NA	Unknown	21.7342	23.6447	19.7218	19.0021	19.0816	17.6702	18.5258	7.28848	22.1227	21.1226	21.0235	19.9462	18.3355	19.7361	20.066	1.15463e-14	-0.388483	2.5221	-1.30176	-0.944139	0.746117	-2.06596	-1.54018	7.28848	0.0971788	0.974136	0.401024	0.269162	0.203315	0.73824	0.498197	4.45595	0	0	0	0	0	0	0	1
4882	197.091	7.23067	Positive	NA	Unknown	14.89	15.0544	15.4637	19.0334	21.0373	19.0537	17.7608	16.0052	8.97433	12.1588	17.1393	21.2629	21.142	19.9301	20.1499	18.2886	5.91572	2.89569	-1.67558	-2.22951	-0.104692	-0.876383	-2.38913	-2.2834	2.30022	0.824288	0.398388	0.577746	0.0187297	0.181633	0.6338	0.596455	1	0	0	0	0	0	0	0
4884	235.168	10.2177	Positive	NA	Unknown	16.5033	15.8752	16.7934	15.9647	18.6955	20.7116	20.9162	20.0738	21.0896	20.0761	19.5077	17.0822	18.1464	17.7022	18.1668	17.9132	-4.58625	-4.20091	-2.71432	-1.11748	0.549096	3.00943	2.74935	2.16053	7.09305	6.37437	3.56355	0.991019	0.382635	4.11435	3.62835	2.57087	1	1	1	0	0	1	1	1
4890	237.072	2.58563	Positive	NA	Unknown	20.9099	21.134	21.4758	20.2452	19.4731	19.5283	22.0782	18.6485	20.8138	21.1545	20.5715	19.4669	18.9955	17.7102	15.8512	16.805	0.0961187	-0.0205444	0.904244	0.778269	0.477637	1.81806	6.22708	1.84347	0.0667281	0.0134995	1.00676	0.816123	0.425552	2.76483	12.3907	2.82073	0	0	0	0	0	1	1	1
4892	166.07	1.49755	Positive	NA	Unknown	22.533	22.2976	21.9168	20.9991	20.4705	19.9248	17.4771	17.1154	20.4969	20.5076	19.5298	20.0433	19.5313	18.2108	16.4307	16.7047	2.0361	1.79	2.38693	0.955769	0.93923	1.71397	1.04642	0.410684	4.66546	3.91203	5.74764	1.58399	1.54431	3.68225	1.80742	0.49009	1	1	1	0	0	1	0	0
4893	323.073	6.58208	Positive	NA	Unknown	25.2765	23.1114	23.592	22.4384	21.2305	20.3292	18.9737	17.5401	20.4729	21.3647	20.9775	19.8688	18.9395	16.4686	13.7784	14.1621	4.80362	1.7467	2.61445	2.56961	2.29105	3.86055	5.1953	3.37796	5.20277	1.23299	2.21497	2.15982	1.82694	3.87051	5.75847	3.20687	1	0	1	1	0	1	1	1
4896	413.139	7.12611	Positive	NA	Unknown	18.4368	19.7298	20.5851	20.6356	20.9403	21.3759	19.6412	16.0367	18.9761	19.9392	20.2318	20.2564	20.5002	18.6225	18.9906	11.4663	-0.539318	-0.209363	0.353294	0.379251	0.440111	2.75333	0.650552	4.57045	0.696934	0.210631	0.399353	0.437266	0.530782	6.79564	0.902836	11.7451	0	0	0	0	0	1	0	1
4898	259.029	2.25816	Positive	NA	Unknown	19.9144	19.7632	19.412	19.1651	18.8543	17.7619	16.1592	16.939	20.1767	20.6046	20.0749	20.0704	19.706	17.9836	13.7122	16.5902	-0.262233	-0.841407	-0.662913	-0.905289	-0.851719	-0.221691	2.44698	0.348792	0.210933	0.945998	0.680448	1.04895	0.962343	0.173434	4.36894	0.29714	0	0	0	0	0	0	1	0
4899	215.09	7.97647	Positive	NA	Unknown	19.7528	20.8696	20.4379	19.0003	18.2282	16.803	15.9851	17.8957	19.1814	20.4394	20.1554	19.5166	18.7264	16.3382	15.0065	15.4673	0.571388	0.430218	0.282526	-0.516343	-0.498244	0.464862	0.97856	2.42832	0.495409	0.344775	0.207216	0.434452	0.415029	0.380011	1.03153	3.82064	0	0	0	0	0	0	0	1
4900	234.132	2.52948	Positive	NA	Unknown	15.2764	16.6877	15.9795	19.5208	19.6484	17.6376	15.2624	14.2344	16.2882	20.1203	21.7476	22.0509	21.0602	19.9162	19.8783	17.4482	-1.01181	-3.4326	-5.7681	-2.53009	-1.41174	-2.27857	-4.61589	-3.21378	0.390543	2.12143	4.43893	1.3611	0.602809	1.17093	3.25454	1.92706	0	1	1	0	0	0	1	0
4901	319.079	7.75566	Positive	NA	Unknown	20.5862	20.3306	21.5179	21.2735	20.2762	18.3427	17.2525	14.8876	18.9305	20.041	20.4347	20.0234	19.9062	19.5146	19.7327	12.4217	1.65578	0.289544	1.08317	1.2501	0.37008	-1.17189	-2.48023	2.46583	2.72056	0.253225	1.46724	1.80739	0.342006	1.64501	4.78871	4.75154	1	0	0	0	0	0	1	1
4910	128.035	2.09214	Positive	NA	Unknown	20.8715	20.9663	21.2805	20.2255	19.5846	18.4098	16.7847	16.6442	20.7367	21.4426	20.9036	20.4707	19.4903	16.4607	15.5415	14.7347	0.134808	-0.476264	0.376859	-0.245225	0.094283	1.94912	1.24323	1.9095	0.0927435	0.406265	0.303089	0.181569	0.0630803	2.91282	1.51505	2.828	0	0	0	0	0	1	0	1
4911	177.075	6.49104	Positive	NA	Unknown	19.7161	20.7043	21.1036	20.0676	19.6952	18.4427	16.9194	17.8193	18.9513	19.9888	20.3944	20.0595	19.7946	17.798	17.0021	15.777	0.764784	0.715534	0.709127	0.00818792	-0.0993981	0.644701	-0.0827001	2.04227	1.10118	1.00199	0.989348	0.00672515	0.0887274	0.865664	0.0727277	4.5019	0	0	0	0	0	0	0	1
4912	243.085	7.58796	Positive	NA	Unknown	17.3839	17.8715	19.3257	19.2118	18.7397	15.1662	15.9609	17.8156	19.2739	19.675	19.728	20.0094	19.2378	17.5785	17.0114	16.53	-1.89	-1.80348	-0.402394	-0.797576	-0.498098	-2.41236	-1.05052	1.28556	2.29276	2.14146	0.278582	0.670527	0.362668	3.25984	0.981543	1.30909	1	1	0	0	0	1	0	0
4913	407.225	9.01197	Positive	NA	Unknown	20.9197	21.3121	21.5738	21.1937	20.7802	20.7601	19.5235	14.2084	19.5143	19.1998	20.4839	21.0477	20.6905	19.8646	16.7246	3.44448	1.40536	2.11226	1.0899	0.146016	0.0896309	0.895517	2.79884	10.7639	0.499169	0.865684	0.360379	0.0378598	0.0228743	0.282643	1.29023	8.15646	0	0	0	0	0	0	0	1
4917	175.035	10.6791	Positive	NA	Unknown	19.0514	22.124	21.8044	20.8299	19.2086	18.855	18.5436	14.2565	19.178	19.2881	21.2283	19.9863	18.9152	16.5342	17.773	16.0918	-0.126507	2.83596	0.576133	0.843605	0.293384	2.32075	0.770655	-1.83535	0.054068	2.65493	0.297623	0.481847	0.13493	1.98328	0.428676	1.40965	0	1	0	0	0	1	0	0
4920	158.52	2.26337	Positive	NA	Unknown	20.4888	20.3497	20.2632	20.0607	19.809	19.1473	17.7506	18.5153	20.5463	20.9119	20.7078	20.5428	20.3712	19.1422	16.1612	18.189	-0.0575143	-0.562217	-0.444573	-0.482054	-0.562142	0.0050335	1.58935	0.326231	0.0443652	0.623221	0.457278	0.508115	0.623109	0.00371637	2.73751	0.309381	0	0	0	0	0	0	1	0
4922	332.132	7.14434	Positive	NA	Unknown	19.8963	19.6653	20.1218	20.3434	19.4926	19.125	18.4085	15.3115	18.5164	18.2907	19.8778	20.1165	19.3003	18.5424	16.3988	11.2987	1.37996	1.37455	0.243994	0.226886	0.192307	0.582617	2.00968	4.01286	1.93095	1.91992	0.194056	0.178337	0.147556	0.572797	3.3258	8.13917	0	0	0	0	0	0	1	1
4926	302.12	7.23088	Positive	NA	Unknown	18.0744	19.847	20.8591	20.3566	19.5788	19.5631	19.2531	16.7947	18.2914	19.8692	20.0726	19.4098	18.9917	17.4993	17.1055	12.1901	-0.216995	-0.0221544	0.786563	0.946772	0.587053	2.06376	2.14764	4.60461	0.170941	0.0151287	0.871561	1.13213	0.584716	3.49185	3.69296	9.54324	0	0	0	0	0	1	1	1
4933	323.073	7.61245	Positive	NA	Unknown	21.2697	21.1468	22.2616	20.8766	20.4131	20.2498	18.7553	16.517	19.6172	19.54	20.1826	19.7414	19.5686	17.384	15.9498	13.9847	1.65253	1.60685	2.079	1.13515	0.844552	2.86581	2.80547	2.53223	2.26298	2.17241	3.15282	1.31071	0.861673	4.91523	4.7777	4.15766	1	1	1	0	0	1	1	1
4936	303.084	7.54709	Positive	NA	Unknown	16.3437	16.0481	16.7725	19.4504	18.0516	14.6786	13.9666	13.1042	19.9801	19.4285	20.9756	21.3643	20.9995	20.0481	17.1809	11.9602	-3.63634	-3.38035	-4.20303	-1.91382	-2.94793	-5.36946	-3.21435	1.14408	4.4031	3.98333	5.34042	1.75802	3.28708	7.24665	3.7137	0.842262	1	1	1	0	1	1	1	0
4937	252.085	8.64529	Positive	NA	Unknown	21.0153	21.2771	21.9042	21.2192	19.8467	20.0021	18.711	15.0182	18.287	19.7586	20.7397	20.4831	18.5466	17.8001	17.9113	11.7334	2.72829	1.5185	1.16443	0.736104	1.30016	2.20204	0.799626	3.28475	5.09753	2.2371	1.51941	0.792068	1.78384	3.81026	0.888552	6.46116	1	1	0	0	0	1	0	1
4938	212.09	6.38525	Positive	NA	Unknown	19.3609	18.2256	17.2687	19.7427	20.6349	17.9844	16.2023	16.1342	20.9645	20.1089	19.6724	21.0713	20.299	18.5824	16.604	12.9839	-1.60356	-1.88329	-2.40369	-1.32855	0.33592	-0.597978	-0.401705	3.15023	2.29796	2.90042	4.09245	1.74659	0.273664	0.569145	0.341014	5.8606	1	1	1	0	0	0	0	1
4939	120.536	1.28057	Positive	NA	Unknown	11.7735	13.5964	12.0937	18.161	19.4013	16.9899	19.3141	20.9194	13.2018	15.0912	14.8884	20.028	19.6329	18.1916	19.8824	21.7355	-1.42827	-1.49474	-2.79466	-1.86699	-0.231624	-1.20165	-0.568309	-0.816095	0.888842	0.947333	2.33747	1.30019	0.0957189	0.700329	0.267764	0.420081	0	0	1	0	0	0	0	0
4941	403.082	6.80013	Positive	NA	Unknown	17.5383	21.2982	19.2425	18.1002	17.65	16.3782	15.3227	13.9461	16.7931	20.6834	20.6342	19.4497	17.625	15.2327	14.7266	3.15303e-14	0.745127	0.614752	-1.39164	-1.34948	0.0250251	1.14546	0.596049	13.9461	0.191313	0.153287	0.409317	0.3936	0.00542539	0.3205	0.147993	9.25996	0	0	0	0	0	0	0	1
4943	325.057	8.83983	Positive	NA	Unknown	19.3114	18.1398	18.3432	17.1599	14.4624	14.8845	10.9347	3.90799e-14	20.6281	19.9102	19.6223	18.9747	16.1624	10.6568	-3.55271e-15	-7.37188e-14	-1.31672	-1.7704	-1.27914	-1.81473	-1.69995	4.22769	10.9347	1.12799e-13	3.12339	4.71287	2.99662	4.87131	4.46164	12.6218	24.6885	0	1	1	1	1	1	1	1	0
4945	137.026	1.54899	Positive	NA	Unknown	18.6633	19.4779	19.6954	16.8962	18.1057	18.3653	19.7791	21.7874	19.7262	20.2337	20.2585	19.9915	18.6772	18.0583	20.3441	21.2497	-1.06292	-0.755832	-0.563177	-3.09528	-0.57151	0.307062	-0.565049	0.537678	1.30919	0.808321	0.542888	5.91087	0.553543	0.252842	0.545274	0.510757	0	0	0	1	0	0	0	0
4952	104.062	6.26235	Positive	NA	Unknown	3.40135	7.15612	16.9284	11.6515	13.133	14.908	10.6849	3.26462	14.9692	22.0943	21.3716	15.1708	14.7397	13.9114	12.7726	3.4175	-11.5678	-14.9382	-4.4432	-3.51932	-1.60676	0.99662	-2.0877	-0.152883	4.14683	5.82204	1.04802	0.756814	0.274818	0.156699	0.38012	0.0212113	1	1	0	0	0	0	0	0
4953	411.16	7.96887	Positive	NA	Unknown	21.5084	21.3687	21.7115	21.7285	20.809	19.4238	17.7154	6.83322	22.3465	20.9328	20.8614	20.2829	19.0442	13.8441	12.029	3.06977e-14	-0.838108	0.435953	0.850086	1.44553	1.76481	5.57969	5.6864	6.83322	0.258771	0.121467	0.263241	0.513527	0.670161	3.46909	3.56297	4.59092	0	0	0	0	0	1	1	1
4962	217.001	1.73364	Positive	NA	Unknown	17.125	19.3263	18.9872	20.1797	20.4714	19.9279	19.7953	19.6869	15.2708	19.1122	19.906	20.8642	20.7104	20.7452	20.1693	20.2965	1.85415	0.214084	-0.918736	-0.684435	-0.238915	-0.817307	-0.373958	-0.609514	2.00147	0.122749	0.734981	0.495639	0.138841	0.627084	0.233304	0.426559	1	0	0	0	0	0	0	0
4963	291.142	9.35829	Positive	NA	Unknown	21.0776	19.6376	19.3946	17.9216	15.3386	15.4017	7.54406	3.59781	21.7174	20.956	20.5469	19.2414	14.6646	3.43873	-4.44089e-15	3.39749	-0.639867	-1.31834	-1.15226	-1.31982	0.67394	11.963	7.54406	0.200324	0.0949752	0.215458	0.184038	0.215742	0.100533	4.31013	2.23685	0.0278412	0	0	0	0	0	1	1	0
4964	193.122	9.47797	Positive	NA	Unknown	19.6856	19.2861	19.2256	18.7836	18.5621	18.674	18.4864	18.4753	21.0639	20.4418	20.3321	19.7743	19.0061	17.8491	16.7529	16.9741	-1.37833	-1.15572	-1.10652	-0.99068	-0.443941	0.824855	1.73347	1.50121	2.70904	2.09725	1.96828	1.67517	0.544727	1.28471	3.75458	3.06307	1	1	0	0	0	0	1	1
4967	194.08	8.66873	Positive	NA	Unknown	12.432	13.9388	16.6747	16.1894	16.9513	15.2074	13.8531	16.2212	15.0702	20.4547	20.3739	19.378	18.9179	19.0277	19.2123	17.6534	-2.63823	-6.51589	-3.69921	-3.18863	-1.96654	-3.82029	-5.35913	-1.43215	2.42294	8.0696	3.92422	3.18379	1.57905	4.10293	6.39736	1.00158	1	1	1	1	0	1	1	0
4970	202.143	6.56345	Positive	NA	Unknown	12.5505	14.3684	14.5349	14.139	16.1348	14.9416	13.1285	14.9345	17.393	20.4833	21.3669	20.7682	19.5796	20.1726	20.4809	17.9413	-4.84254	-6.11491	-6.83203	-6.62927	-3.44486	-5.23108	-7.35245	-3.00673	5.3874	7.2046	8.19312	7.91694	3.38587	5.94818	8.88904	2.78735	1	1	1	1	1	1	1	1
4971	450.174	7.67892	Positive	NA	Unknown	18.9456	19.4438	20.5729	21.0575	17.3166	7.841	7.27797	2.62013e-14	18.2137	18.1502	19.6283	20.7395	20.0904	18.7915	18.9592	5.55112e-14	0.731911	1.29359	0.944582	0.318024	-2.77377	-10.9505	-11.6812	-2.93099e-14	0.141958	0.276485	0.190227	0.0571661	0.740092	5.1907	5.64491	0	0	0	0	0	0	1	1	0
4974	137.533	6.46831	Positive	NA	Unknown	18.7809	19.3897	20.4682	19.6514	19.37	18.1224	16.5624	17.5317	18.5602	20.0334	20.4084	20.1698	19.881	17.8984	17.0663	15.8554	0.220735	-0.643648	0.0598421	-0.518377	-0.510973	0.223953	-0.503839	1.67635	0.22038	0.871572	0.051905	0.64759	0.635149	0.224193	0.623248	3.45565	0	0	0	0	0	0	0	1
4976	257.173	9.80597	Positive	NA	Unknown	14.5927	16.5001	17.537	19.0215	21.1049	23.9682	25.6892	22.9483	15.4786	16.7896	19.7279	16.4663	17.909	19.3705	22.3664	20.3799	-0.885915	-0.289508	-2.19091	2.55525	3.19588	4.59773	3.32285	2.56839	0.486787	0.126934	1.71743	2.14942	2.97234	4.92529	3.14279	2.16555	0	0	0	1	1	1	1	1
4977	231.133	10.5433	Positive	NA	Unknown	18.3435	20.6163	21.3853	20.5723	20.3502	19.5619	19.8389	12.2083	18.0783	18.5946	19.7503	20.1542	20.3979	18.6319	18.1587	11.3962	0.265168	2.02165	1.63501	0.41818	-0.0477152	0.92999	1.68019	0.812169	0.15619	2.26873	1.66483	0.266644	0.0249098	0.746815	1.73225	0.621354	0	1	0	0	0	0	0	0
4978	179.033	7.86554	Positive	NA	Unknown	24.8061	24.3656	22.946	23.3864	23.5789	24.0763	22.3052	20.1806	15.8371	16.4306	16.7663	19.6822	20.3973	17.7542	17.0053	14.2009	8.96898	7.93503	6.17967	3.70424	3.18152	6.32217	5.29993	5.97967	10.1695	8.93652	6.69584	3.39178	2.72823	6.88366	5.52092	6.43083	1	1	1	1	1	1	1	1
4983	269.043	9.2298	Positive	NA	Unknown	18.6204	18.2572	17.0591	16.3572	15.428	14.1951	16.0293	13.3556	19.4595	18.5204	17.8198	18.5251	14.6879	3.39453	2.22045e-15	2.13163e-14	-0.839081	-0.263259	-0.760733	-2.16792	0.740094	10.8005	16.0293	13.3556	0.275079	0.0738311	0.244404	0.953208	0.236498	8.58959	12.7595	10.7361	0	0	0	0	0	1	1	1
4986	422.142	7.22969	Positive	NA	Unknown	16.7217	19.9249	22.2233	20.0472	19.4589	16.6808	-3.55271e-15	3.39693	17.2116	17.0945	19.5946	20.9108	18.9931	17.3247	15.9655	6.21725e-15	-0.489929	2.83041	2.6287	-0.863576	0.465795	-0.643898	-15.9655	3.39693	0.117925	1.05828	0.953326	0.225952	0.111494	0.160505	10.5858	1.37443	0	0	0	0	0	0	1	0
4987	234.132	2.71256	Positive	NA	Unknown	15.1047	16.5567	15.7891	18.6399	18.1707	15.531	15.4209	14.052	16.2882	20.6837	21.2899	20.8737	20.0647	19.2724	19.8346	16.7198	-1.18345	-4.12695	-5.50078	-2.23373	-1.89401	-3.74146	-4.41375	-2.66782	0.442509	2.54541	3.83423	1.04655	0.830318	2.20716	2.80506	1.34941	0	1	1	0	0	1	1	0
4988	151.53	1.23046	Positive	NA	Unknown	16.7004	19.4382	19.8955	20.346	21.0762	20.5698	20.5656	18.4558	19.7368	20.3624	18.4029	21.4645	21.3699	21.1596	19.5761	20.4031	-3.03645	-0.924177	1.4926	-1.11846	-0.293686	-0.58978	0.989517	-1.94728	2.74242	0.511273	0.982357	0.659259	0.128302	0.289551	0.55949	1.43711	1	0	0	0	0	0	0	0
4993	289.09	6.63186	Positive	NA	Unknown	20.314	20.994	20.5635	18.9553	19.0432	19.5235	18.0312	15.194	19.7679	19.825	19.5556	18.7633	19.2689	18.877	16.2747	13.5419	0.546078	1.16893	1.0079	0.192049	-0.225662	0.646474	1.75652	1.65209	0.40175	1.12429	0.911777	0.116667	0.139775	0.499506	2.02768	1.85422	0	0	0	0	0	0	1	0
4995	174.112	1.61887	Positive	NA	Unknown	18.4389	19.6159	17.5228	19.5438	21.0285	20.1608	19.3632	15.8717	16.713	18.2335	20.2229	22.2623	21.4129	20.431	19.5412	20.2404	1.72582	1.38247	-2.70008	-2.71848	-0.38433	-0.270262	-0.177961	-4.36874	0.864285	0.637707	1.63843	1.65471	0.133061	0.0901341	0.0575434	3.29093	0	0	0	0	0	0	0	1
4996	128.528	6.46583	Positive	NA	Unknown	17.6766	18.2369	19.4915	18.8869	18.6728	16.4358	15.8198	17.0771	18.2401	19.5318	19.866	19.7475	19.5211	16.9331	16.6266	15.0097	-0.563554	-1.29495	-0.374473	-0.86056	-0.848372	-0.497345	-0.806824	2.0674	0.451803	1.41993	0.270941	0.795627	0.780122	0.385062	0.728145	2.80346	0	0	0	0	0	0	0	1
4997	442.043	7.42768	Positive	NA	Unknown	16.6512	15.1186	16.9008	18.4742	18.5509	18.8037	19.5776	7.56756	19.9293	19.305	19.8627	18.8807	18.8999	17.1592	15.2293	-3.20854e-14	-3.27809	-4.1864	-2.96184	-0.406476	-0.348959	1.64448	4.3482	7.56756	1.29506	1.84693	1.11985	0.0953768	0.0807923	0.500259	1.95199	4.30805	0	0	0	0	0	0	0	1
4999	228.07	0.891403	Positive	NA	Unknown	20.6514	21.0818	20.9792	20.4603	19.9621	19.2543	14.0364	11.7576	19.9294	19.5542	19.6941	19.3579	19.4737	16.3294	16.1317	12.2403	0.721997	1.52759	1.28515	1.10239	0.488345	2.92495	-2.09522	-0.482637	0.514126	1.45465	1.13445	0.913238	0.312608	3.71771	2.30468	0.30811	0	0	0	0	0	1	1	0
5000	159.075	1.27765	Positive	NA	Unknown	16.486	17.3052	15.7196	18.8122	19.1447	14.2347	14.096	15.6571	16.2661	19.552	17.9322	21.7543	20.5675	21.6874	20.6373	19.1083	0.2199	-2.24681	-2.21258	-2.94211	-1.42281	-7.45265	-6.54133	-3.4512	0.0541171	0.857336	0.839229	1.25583	0.46384	4.74528	3.97234	1.58184	0	0	0	0	0	1	1	0
5002	232.995	2.18533	Positive	NA	Unknown	21.6992	21.8619	21.5493	20.9023	20.385	19.3316	17.2998	19.1657	19.1474	19.1388	19.5718	19.9139	19.6264	18.2845	17.6688	18.214	2.55175	2.72313	1.9775	0.988384	0.758579	1.0471	-0.368959	0.951684	9.17109	9.82384	6.85237	2.68683	1.82802	2.91988	0.658523	2.5436	1	1	1	0	0	1	0	0
5004	227.101	6.75097	Positive	NA	Unknown	18.0854	18.1779	17.6329	17.8012	17.8087	18.1119	18.3525	17.9978	20.1039	20.0405	19.8424	20.2398	18.9602	18.6687	18.9276	18.492	-2.01846	-1.86261	-2.20944	-2.43866	-1.15156	-0.55683	-0.575052	-0.494241	6.85791	6.21282	7.63424	8.54072	3.25163	1.13586	1.18936	0.95926	1	1	1	1	1	0	0	0
5007	170.044	2.20196	Positive	NA	Unknown	21.8645	21.8874	22.2221	21.4839	20.8064	21.0039	19.6689	17.784	20.4362	20.4394	20.8438	20.9042	20.1854	19.0107	18.3339	15.1043	1.42829	1.44801	1.37823	0.579728	0.621049	1.99323	1.33496	2.67961	1.66932	1.703	1.58488	0.476916	0.521858	2.71155	1.51312	4.12195	0	0	0	0	0	1	0	1
5013	204.059	8.87701	Positive	NA	Unknown	19.5196	18.6038	18.3299	17.2073	15.449	15.8904	13.2203	7.9756	20.4016	19.8473	19.3887	18.7202	14.9681	13.9823	7.98974	8.88178e-16	-0.881981	-1.24359	-1.05878	-1.51289	0.480867	1.90804	5.23051	7.9756	0.172479	0.25856	0.213425	0.328621	0.0875691	0.440666	1.7842	3.28716	0	0	0	0	0	0	0	1
5018	140.023	2.28865	Positive	NA	Unknown	19.3621	19.8745	20.3582	18.9794	18.7948	18.5711	15.5018	15.0799	19.2643	19.9215	20.4019	19.0734	18.9967	18.8362	15.8132	18.4603	0.0978004	-0.0469952	-0.0436326	-0.0940421	-0.201959	-0.265137	-0.311402	-3.38035	0.0513013	0.0239613	0.0222047	0.0492272	0.112121	0.152198	0.183095	4.55163	0	0	0	0	0	0	0	1
5019	267.096	6.48752	Positive	NA	Unknown	17.8429	18.6193	18.2251	15.0202	15.1596	15.7801	15.8067	15.4185	19.2536	19.9421	20.0568	19.1909	18.0833	16.6485	15.6158	10.5261	-1.41075	-1.32281	-1.83172	-4.17071	-2.92372	-0.868376	0.190945	4.89237	1.81107	1.64894	2.6487	7.88852	5.08365	0.902613	0.135846	9.41013	0	0	1	1	1	0	0	1
5021	278.999	2.26663	Positive	NA	Unknown	19.6487	19.5654	19.218	18.8562	18.5528	17.5967	15.7186	16.3972	19.9183	20.3505	19.8596	19.7438	19.395	17.6096	12.2859	16.381	-0.269595	-0.785123	-0.641614	-0.887575	-0.84214	-0.012902	3.43276	0.0162072	0.134243	0.487011	0.375895	0.572399	0.533912	0.00567466	3.90282	0.00714019	0	0	0	0	0	0	1	0
5022	169.075	8.38464	Positive	NA	Unknown	16.6794	17.8389	16.9039	18.8428	19.4379	18.8266	19.3025	19.9988	15.6364	17.4351	18.5654	20.3579	19.2712	19.9548	19.8566	16.9779	1.04297	0.403788	-1.66157	-1.51515	0.166621	-1.12813	-0.554082	3.0209	0.991999	0.284824	1.94143	1.69708	0.102593	1.10878	0.422985	4.54844	0	0	0	0	0	0	0	1
5027	349.109	2.7183	Positive	NA	Unknown	20.533	21.1505	21.1718	19.8099	19.0025	18.9107	18.1353	16.4415	21.6684	20.8808	19.2634	19.2272	19.0645	15.1032	14.8091	14.5481	-1.1354	0.269687	1.90841	0.58272	-0.0619902	3.80745	3.32623	1.89338	1.09945	0.173952	2.33339	0.444174	0.0353387	6.05619	5.08787	2.30668	0	0	1	0	0	1	1	1
5028	219.173	9.75891	Positive	NA	Unknown	21.9817	21.9648	21.4877	20.7252	19.9991	19.6881	18.7502	17.8378	20.5243	19.9206	20.1168	19.8699	18.8762	17.7757	16.7378	14.0197	1.45738	2.04422	1.37089	0.855301	1.12291	1.91237	2.01244	3.81807	2.35841	3.82616	2.15736	1.08959	1.6128	3.48463	3.7434	8.44535	1	1	1	0	0	1	1	1
5031	189.127	8.4484	Positive	NA	Unknown	20.5527	20.9667	20.4954	18.5344	15.0154	14.6414	16.669	18.2571	20.2884	20.97	20.1013	17.8625	16.2202	11.7602	12.2688	13.5569	0.264295	-0.00337821	0.394122	0.671971	-1.2048	2.88118	4.40015	4.70026	0.195476	0.00209532	0.315794	0.628186	1.42381	4.93559	8.31042	8.93936	0	0	0	0	0	1	1	1
5035	233.116	9.14492	Positive	NA	Unknown	18.8511	19.8585	19.9904	18.9765	17.8561	17.3684	16.58	18.6266	18.9238	19.875	20.6798	19.9475	17.9413	16.4915	14.5037	13.9604	-0.072677	-0.0164951	-0.689409	-0.971019	-0.0852243	0.876906	2.0763	4.66614	0.046032	0.0100547	0.627541	1.00676	0.054437	0.872514	3.0208	8.61519	0	0	0	0	0	0	1	1
5038	309.093	6.01778	Positive	NA	Unknown	23.4398	21.6776	20.4158	18.8597	18.8736	19.0035	18.1072	10.792	22.2669	19.9094	17.9115	16.3692	17.8089	14.7713	15.9404	10.942	1.17286	1.7682	2.50425	2.49046	1.06469	4.23221	2.1668	-0.149994	0.526232	0.919664	1.51234	1.50027	0.463748	3.23728	1.22717	0.0490735	0	0	0	0	0	1	0	0
5039	160.535	1.28569	Positive	NA	Unknown	18.2967	19.957	19.7321	19.7893	20.8111	20.2375	20.3537	19.7094	19.5795	20.3214	19.4592	21.4023	21.3136	20.8914	20.2	20.13	-1.28281	-0.364359	0.272815	-1.61294	-0.502516	-0.653958	0.153693	-0.420585	1.8629	0.333317	0.234377	2.60017	0.502317	0.714414	0.121087	0.399242	0	0	0	1	0	0	0	0
5040	425.268	12.3031	Positive	NA	Unknown	8.02343	14.5822	4.34918	11.128	4.1541	19.8503	18.6044	11.4395	3.55271e-15	14.4014	16.0765	13.7426	21.033	19.8348	19.7694	11.9605	8.02343	0.180816	-11.7273	-2.61464	-16.8789	0.0154671	-1.165	-0.521002	1.53296	0.0180397	2.66367	0.334792	4.4493	0.00151484	0.129249	0.0539646	0	0	1	0	1	0	0	0
5045	316.21	7.87146	Positive	NA	Unknown	18.3206	16.1535	17.6717	18.0508	18.1472	17.1822	18.3679	18.1331	18.2109	18.2435	19.1234	19.8321	18.5237	18.7347	19.7579	18.3641	0.109606	-2.09004	-1.45169	-1.78136	-0.37649	-1.55251	-1.39001	-0.231026	0.089631	4.11759	2.45251	3.29213	0.376761	2.7031	2.30246	0.207902	0	1	1	1	0	1	1	0
5046	266.01	6.26082	Positive	NA	Unknown	12.6582	12.2373	18.5578	13.9699	15.0207	16.5591	13.3378	8.88178e-16	15.6019	17.5	20.4112	17.2612	16.6617	16.4099	15.5069	3.6112	-2.94369	-5.26268	-1.85343	-3.29125	-1.64106	0.149199	-2.16906	-3.6112	1.36684	3.17506	0.712534	1.60688	0.604444	0.0383001	0.885317	1.83942	0	1	0	0	0	0	0	0
5048	179.069	9.78663	Positive	NA	Unknown	21.8125	21.4371	20.4267	19.8123	19.8964	20.1236	22.2244	19.4741	21.359	19.6083	18.729	19.7313	19.5548	18.6152	18.5325	17.6659	0.453445	1.8288	1.69773	0.08104	0.341576	1.50839	3.69187	1.80814	0.549763	3.96562	3.5745	0.072537	0.381056	3.02185	9.45206	3.90361	0	1	1	0	0	1	1	1
5051	222.556	8.46593	Positive	NA	Unknown	12.628	13.3915	7.79936	7.18434	4.56268	10.8354	13.8145	12.2944	20.0568	20.2394	19.5465	19.0426	16.9677	15.9038	14.1238	7.09177	-7.42881	-6.84789	-11.7472	-11.8582	-12.405	-5.06842	-0.309241	5.20267	1.90859	1.69493	3.69331	3.74226	3.98442	1.09805	0.0396325	1.13974	0	0	1	1	1	0	0	0
5052	202.535	9.28896	Positive	NA	Unknown	11.5187	8.32523	12.7983	13.803	12.5623	13.3901	12.828	14.3228	19.3328	20.4	20.0627	18.9381	13.6047	6.92683	3.68621	1.35447e-14	-7.81412	-12.0748	-7.26442	-5.13505	-1.04244	6.46328	9.14181	14.3228	2.52437	4.65824	2.27042	1.37045	0.173259	1.9147	3.16429	5.82594	1	1	1	0	0	0	1	1
5054	219.1	8.90285	Positive	NA	Unknown	19.8802	20.1929	20.7274	20.7744	20.2372	19.8574	20.5	19.4496	19.8164	19.559	20.2014	20.493	19.9471	18.4366	15.6824	14.339	0.0638013	0.633923	0.525994	0.281321	0.290127	1.42084	4.81759	5.11059	0.0328552	0.435765	0.343996	0.162946	0.168817	1.31544	7.15673	7.6713	0	0	0	0	0	0	1	1
5056	160.549	7.21632	Positive	NA	Unknown	16.2553	16.8115	18.3315	18.4933	17.2195	13.9698	13.6041	18.3497	18.7427	19.8749	19.8176	19.6098	19.1607	17.0549	14.5506	14.7559	-2.48737	-3.06344	-1.48606	-1.11655	-1.94115	-3.08515	-0.946488	3.59378	3.26651	4.3674	1.54778	1.0266	2.28451	4.40957	0.81453	5.40232	1	1	0	0	1	1	0	1
5057	225.147	7.82183	Positive	NA	Unknown	19.449	19.4947	20.4855	19.8199	18.3818	17.1659	17.6204	16.8023	19.876	20.0846	20.1302	19.6306	18.5601	16.3247	16.8373	13.9293	-0.427027	-0.589918	0.355261	0.18927	-0.178298	0.841129	0.783099	2.87305	0.444736	0.682105	0.352032	0.165696	0.15475	1.11815	1.01026	6.28992	0	0	0	0	0	0	0	1
5058	349.089	8.06162	Positive	NA	Unknown	21.3009	23.7917	23.6259	24.27	23.6548	22.5993	21.8819	18.621	19.4032	17.4119	19.0913	19.6245	19.4357	14.6414	13.0696	12.0244	1.89771	6.37979	4.53462	4.64547	4.21914	7.95789	8.81229	6.5966	0.921938	5.17566	3.2377	3.35071	2.92043	6.84291	7.72127	5.40659	0	1	1	1	1	1	1	1
5059	303.083	8.25372	Positive	NA	Unknown	20.1357	21.1608	20.9518	23.0356	22.2053	20.6866	19.3016	17.0231	18.7862	21.0532	21.4704	18.8847	19.6676	19.0732	18.702	11.6195	1.34949	0.107572	-0.518632	4.15091	2.53772	1.61349	0.599616	5.40357	0.995089	0.0487563	0.283041	4.94448	2.47991	1.28385	0.338452	6.9102	0	0	0	1	1	0	0	1
5061	270.132	7.42603	Positive	NA	Unknown	14.2649	17.3722	16.8047	22.4584	21.4394	18.218	16.2063	15.8207	6.97641	12.1347	16.7286	21.3731	20.9376	20.3692	19.3762	14.9815	7.28848	5.23742	0.0760594	1.08531	0.501795	-2.15125	-3.16989	0.839195	3.66413	2.2806	0.0152207	0.268387	0.1102	0.643281	1.10169	0.19764	1	1	0	0	0	0	0	0
5063	202.143	4.86066	Positive	NA	Unknown	18.9831	20.06	19.84	19.7234	19.8904	20.4238	19.7543	17.3992	20.7923	21.7285	21.1836	21.7069	20.7742	19.6477	16.4814	14.5091	-1.80922	-1.66855	-1.34355	-1.98345	-0.883798	0.776038	3.2729	2.89008	2.25198	2.0013	1.45994	2.5739	0.805574	0.674156	5.17444	4.38101	1	1	0	1	0	0	1	1
5065	154.086	7.05248	Positive	NA	Unknown	16.2322	19.1631	17.786	20.5857	22.0787	18.6985	17.7894	18.0669	16.9452	18.2428	18.8827	22.5079	22.2728	21.4079	18.5041	17.1924	-0.71305	0.920262	-1.09675	-1.92216	-0.19402	-2.70932	-0.714698	0.874484	0.321601	0.443875	0.558327	1.21333	0.0726506	1.99628	0.322522	0.415733	0	0	0	0	0	1	0	0
5069	289.069	8.43303	Positive	NA	Unknown	24.4609	24.8229	24.7331	24.0293	23.9511	23.3546	22.2486	18.619	20.2569	19.3816	19.6669	20.6839	21.5861	19.8458	18.939	14.1659	4.20391	5.44131	5.06616	3.34543	2.365	3.50874	3.30959	4.45316	3.23545	4.62918	4.20072	2.32749	1.40483	2.49444	2.2913	3.51052	1	1	1	1	0	1	1	1
5072	176.574	9.3391	Positive	NA	Unknown	11.105	4.23892	11.055	14.341	19.7489	22.4841	24.2897	20.9641	13.9362	16.487	18.8787	14.2042	15.3917	17.7906	21.7604	18.4747	-2.83116	-12.2481	-7.8237	0.136856	4.35715	4.69346	2.52924	2.48935	0.776099	6.10339	3.33802	0.0241141	1.42915	1.59195	0.665308	0.651157	0	1	1	0	0	0	0	0
5073	183.041	2.75424	Positive	NA	Unknown	18.2358	20.2998	19.6601	19.0868	19.5589	19.8724	19.6987	16.96	20.9876	20.4359	18.3485	19.962	19.7578	19.2288	16.0257	16.2561	-2.75185	-0.136146	1.31157	-0.87517	-0.19899	0.643636	3.67296	0.70392	1.64095	0.0425951	0.580154	0.344295	0.0635737	0.236643	2.49915	0.263504	0	0	0	0	0	0	1	0
5075	289.069	7.53823	Positive	NA	Unknown	23.9505	23.6697	22.3891	23.9022	23.689	21.6915	21.9123	17.7655	21.3142	21.3583	21.0502	21.5246	21.8041	18.8269	17.5477	12.8318	2.63628	2.31146	1.3389	2.37766	1.88492	2.86462	4.36452	4.93372	2.24556	1.85369	0.847911	1.93166	1.37811	2.53379	4.58632	5.39526	1	0	0	0	0	1	1	1
5076	158.996	1.57515	Positive	NA	Unknown	21.1389	21.0731	21.421	22.1537	22.2725	21.7607	20.8459	19.9992	20.6601	21.4265	22.032	22.7928	22.065	21.8793	21.1326	21.5814	0.478775	-0.353458	-0.611031	-0.639058	0.20743	-0.118592	-0.286646	-1.58215	0.55702	0.376146	0.774573	0.82409	0.197007	0.104559	0.289957	3.03612	0	0	0	0	0	0	0	1
5078	263.072	0.900463	Positive	NA	Unknown	20.2341	20.5852	19.6793	21.0723	21.8876	21.2103	20.9642	21.5363	20.0112	21.635	21.7893	22.8984	21.9554	21.3697	20.7529	19.9679	0.222915	-1.04978	-2.11006	-1.82612	-0.0678399	-0.159321	0.211314	1.56841	0.114776	0.768609	2.08657	1.69004	0.0322909	0.0794684	0.10818	1.35531	0	0	1	0	0	0	0	0
5079	287.124	9.8994	Positive	NA	Unknown	18.3766	19.3962	19.237	18.1615	16.2964	12.6768	14.7684	15.5776	19.814	20.741	20.4028	18.8846	18.3435	16.1741	13.6554	11.2584	-1.4374	-1.34473	-1.16584	-0.72313	-2.04708	-3.49728	1.11296	4.3192	1.46792	1.33308	1.08652	0.562931	2.45651	5.19183	1.01729	6.78043	0	0	0	0	1	1	0	1
5080	237.074	10.1286	Positive	NA	Unknown	21.8892	23.8601	23.3084	25.036	24.76	24.0502	22.0378	19.5452	9.01736	12.6434	16.9078	18.8637	19.4909	16.3274	14.3139	14.4176	12.8718	11.2168	6.40054	6.17226	5.26901	7.72282	7.72385	5.1276	6.03201	5.0498	2.29584	2.17753	1.72879	3.01231	3.01288	1.66163	1	1	1	1	0	1	1	0
5082	517.2	8.69536	Positive	NA	Unknown	21.0037	20.7483	19.5297	18.692	17.1331	15.4265	13.4346	3.59818	20.9003	19.1733	18.9093	17.0795	14.6443	-2.66454e-15	-4.44089e-15	-2.93099e-14	0.103416	1.57498	0.620357	1.61252	2.48879	15.4265	13.4346	3.59818	0.0247585	0.531652	0.169332	0.548452	0.993364	11.117	9.66595	1.68761	0	0	0	0	0	1	1	0
5090	128.528	7.23849	Positive	NA	Unknown	16.555	16.4731	18.1352	18.2773	17.1278	15.1245	13.2238	17.9183	18.7057	20.5538	20.0814	19.3498	18.8917	16.9413	13.4964	14.0282	-2.15076	-4.08076	-1.94619	-1.0725	-1.76388	-1.81679	-0.272548	3.89013	2.75835	6.56738	2.38648	1.00813	2.06789	2.15896	0.175245	6.18944	1	1	1	0	1	1	0	1
5094	163.007	1.01634	Positive	NA	Unknown	20.209	19.215	20.4097	20.3774	20.5956	20.7051	19.5882	15.1792	18.7127	18.5234	17.6676	19.7967	20.2401	20.5429	19.5226	16.1623	1.49633	0.691545	2.74202	0.580678	0.355489	0.162172	0.0656262	-0.983069	1.18783	0.416214	2.86014	0.333905	0.185252	0.0771892	0.0297932	0.661157	0	0	1	0	0	0	0	0
5095	118.065	6.26961	Positive	NA	Unknown	7.05472	11.359	16.9393	12.4983	12.8525	15.3335	11.3881	-9.88098e-15	14.9159	22	21.1531	15.7579	14.7346	14.7283	10.0657	5.88418e-15	-7.86122	-10.641	-4.21384	-3.25959	-1.88209	0.605173	1.32244	-1.57652e-14	2.85108	4.36388	1.15419	0.804269	0.388442	0.102606	0.251331	0	1	1	0	0	0	0	0	0
5097	159.112	1.01509	Positive	NA	Unknown	14.4356	14.4362	15.2943	16.0411	18.3779	17.2037	15.738	13.1112	17.2544	17.5103	17.2591	20.4028	19.3054	17.5612	17.1233	20.5811	-2.81885	-3.07404	-1.96488	-4.36164	-0.927487	-0.35742	-1.38532	-7.4699	3.26104	3.68545	1.93427	5.89051	0.666395	0.200884	1.16585	10.8298	1	1	0	1	0	0	0	1
5100	219.053	6.09583	Positive	NA	Unknown	21.6882	23.0571	19.8828	21.5218	21.5725	20.7916	21.0447	16.2929	18.7349	19.4468	16.0828	20.0849	18.4162	19.2853	19.0382	16.6458	2.95332	3.61033	3.8	1.43689	3.15631	1.50633	2.00649	-0.352899	2.38976	3.19242	3.43311	0.847722	2.63171	0.905403	1.3617	0.146302	1	1	1	0	1	0	0	0
5101	198.111	2.51897	Positive	NA	Unknown	4.97987	17.7133	9.62063	19.7745	22.0367	21.6695	21.7789	18.3797	3.55271e-15	3.55271e-15	3.55271e-15	20.576	21.0481	19.3326	17.5141	18.1857	4.97987	17.7133	9.62063	-0.801457	0.988605	2.33686	4.26485	0.193949	1.21184	7.07874	3.14753	0.120874	0.153121	0.432093	0.972189	0.026742	0	1	1	0	0	0	0	0
5102	129.517	1.91313	Positive	NA	Unknown	14.8827	16.4609	16.1054	16.3376	19.2364	18.6047	19.7925	21.0106	15.4201	15.5217	15.8621	18.765	19.6187	20.4822	21.0953	21.4325	-0.537442	0.939171	0.243263	-2.42731	-0.382333	-1.87746	-1.30283	-0.421908	0.42874	0.906926	0.164278	3.55842	0.280153	2.46247	1.44653	0.31612	0	0	0	1	0	1	0	0
5107	221.608	9.8223	Positive	NA	Unknown	20.926	20.8994	20.9976	20.6174	19.5893	18.2352	18.6333	12.7549	19.383	20.4524	20.3431	20.3617	19.1864	16.9281	11.9382	4.77396e-14	1.54299	0.447006	0.654431	0.255714	0.402848	1.30705	6.69514	12.7549	1.02303	0.206622	0.327309	0.109429	0.182994	0.810964	7.77532	14.6635	0	0	0	0	0	0	1	1
5110	186.99	1.54723	Positive	NA	Unknown	21.4702	21.1397	21.2635	21.5248	21.2896	20.8391	19.2156	19.6069	20.236	20.4883	20.9333	21.7546	21.2718	21.0964	19.9597	20.6401	1.23423	0.651475	0.330199	-0.229798	0.0178346	-0.257274	-0.74409	-1.03321	2.43512	0.967455	0.389451	0.249064	0.0158541	0.285542	1.16833	1.87932	1	0	0	0	0	0	0	0
5111	166.071	2.8199	Positive	NA	Unknown	20.547	20.6501	19.8974	19.0903	20.7099	21.6562	21.646	20.9472	19.0223	18.7149	19.0665	20.1456	20.974	20.5604	18.6773	19.6064	1.52464	1.93519	0.830863	-1.05539	-0.264112	1.09579	2.96865	1.34082	1.48141	2.09656	0.631732	0.876891	0.153641	0.924189	3.87299	1.23072	0	1	0	0	0	0	1	0
5112	321.095	8.75989	Positive	NA	Unknown	18.5473	18.1501	19.9888	19.7875	18.9817	18.7083	16.5543	16.3266	21.3955	18.9777	19.1528	18.6629	18.028	16.2061	15.2723	13.0981	-2.84825	-0.827633	0.835998	1.12453	0.953629	2.50221	1.28202	3.22846	6.26932	1.10212	1.11802	1.71539	1.35045	5.31441	2.07677	7.29979	1	0	0	0	0	1	1	1
5118	155.041	7.08946	Positive	NA	Unknown	15.8066	17.3547	18.712	18.8949	19.136	15.2445	16.0482	18.4349	18.148	19.5832	19.752	19.6312	19.1242	17.4302	13.5189	14.8225	-2.34142	-2.22844	-1.03997	-0.736326	0.011775	-2.18575	2.52934	3.61244	2.5208	2.34604	0.786252	0.494468	0.0055863	2.28091	2.81849	4.64235	1	1	0	0	0	1	1	1
5120	86.9088	0.665762	Positive	NA	Unknown	18.5822	17.6615	17.7963	18.3403	18.5775	18.2731	18.1305	18.3589	18.9262	19.1263	18.9846	18.9953	19.0838	19.0211	18.6726	18.1557	-0.344017	-1.46482	-1.18826	-0.655013	-0.506345	-0.748088	-0.542036	0.203177	0.289115	2.07745	1.53152	0.661735	0.470385	0.793545	0.514134	0.155385	0	1	0	0	0	0	0	0
5123	320.111	8.68539	Positive	NA	Unknown	21.1272	20.7669	19.586	18.4231	16.9068	15.8883	12.0566	12.1493	20.8086	19.2236	18.9405	17.7013	15.5802	11.4498	10.6747	-1.9984e-14	0.318596	1.54338	0.645466	0.721848	1.32658	4.43852	1.38191	12.1493	0.161778	1.22774	0.377483	0.435308	0.989769	5.49345	1.04866	15.6265	0	0	0	0	0	1	0	1
5128	131.049	8.06297	Positive	NA	Unknown	20.228	19.8248	19.3403	18.3205	17.9812	17.406	16.5407	10.9139	21.6151	20.3731	19.8325	19.2773	18.2467	16.57	12.7003	10.6906	-1.38714	-0.54826	-0.492222	-0.956798	-0.265508	0.835999	3.84035	0.223315	2.22901	0.598138	0.518469	1.29897	0.239374	1.07088	8.60122	0.19512	1	0	0	0	0	0	1	0
5132	126.074	6.5515	Positive	NA	Unknown	13.8697	13.7839	15.5699	18.0068	17.9252	12.3576	-1.77636e-15	3.29861	11.8367	15.966	18.8843	20.8942	19.2752	17.3591	15.2312	3.41295	2.03294	-2.18216	-3.31442	-2.88734	-1.35001	-5.00143	-15.2312	-0.114339	0.307515	0.335697	0.574864	0.479416	0.188468	1.0116	4.95545	0.0136316	0	0	0	0	0	0	1	0
5134	163.143	1.823	Positive	NA	Unknown	14.6209	15.6441	19.884	20.0426	20.2277	20.9341	21.8746	20.3553	15.8058	16.6656	18.8683	19.796	20.2576	20.156	19.532	18.8118	-1.18492	-1.02158	1.01569	0.246563	-0.0298653	0.778096	2.34258	1.54343	0.848418	0.691839	0.686428	0.121498	0.0132512	0.481509	2.26027	1.23295	0	0	0	0	0	0	1	0
5135	206.101	4.89111	Positive	NA	Unknown	21.1019	21.1804	21.2734	20.2864	19.578	18.5858	19.4286	19.1999	20.7177	20.7768	21.025	20.9619	20.0237	18.544	18.4328	17.4627	0.384224	0.40362	0.248377	-0.67542	-0.445704	0.0417584	0.995853	1.73714	0.471266	0.502523	0.272598	1.0138	0.572798	0.0378944	1.77345	3.94769	0	0	0	0	0	0	0	1
5137	291.194	11.5594	Positive	NA	Unknown	12.8523	14.0126	13.8657	14.5331	19.8412	24.6335	27.9432	24.1409	17.897	16.4636	18.7804	16.1618	14.6313	16.3128	22.5365	19.3211	-5.04469	-2.45097	-4.9146	-1.62875	5.20994	8.3207	5.40671	4.81977	3.95197	1.3961	3.81103	0.782853	4.13187	7.52457	4.3471	3.70872	1	0	1	0	1	1	1	1
5138	202.07	7.25523	Positive	NA	Unknown	17.5589	21.2176	20.6381	21.881	21.9448	21.3045	15.7153	11.3044	14.5651	16.4904	18.169	20.6788	19.8351	19.3443	15.9019	11.3951	2.99377	4.72724	2.46911	1.20226	2.1097	1.96028	-0.186528	-0.0907402	1.37637	2.67472	1.04449	0.396493	0.837579	0.756766	0.0477692	0.0226359	0	1	0	0	0	0	0	0
5140	114.512	1.50267	Positive	NA	Unknown	21.8582	21.4778	21.4508	20.5779	19.9921	19.6421	17.433	17.0073	20.0901	20.1746	19.8555	19.7085	19.477	18.1486	15.5931	15.5308	1.76814	1.30324	1.59539	0.869406	0.515076	1.4935	1.83987	1.47656	3.73386	2.41323	3.22953	1.33922	0.643578	2.9387	3.94643	2.89092	1	1	1	0	0	1	1	1
5142	325.088	6.34049	Positive	NA	Unknown	17.6692	17.0823	20.2565	20.2472	19.7913	19.6678	19.4737	12.7766	18.9998	19.0027	20.7091	19.3271	19.3614	18.8051	18.3056	14.0695	-1.33064	-1.92039	-0.452559	0.920055	0.429844	0.862724	1.16812	-1.29288	2.30579	3.89588	0.505583	1.34795	0.472732	1.22874	1.9069	2.21111	1	1	0	0	0	0	0	1
5152	323.073	7.15332	Positive	NA	Unknown	20.7722	21.121	20.8347	19.6438	19.9696	20.5154	21.9279	17.9746	20.4852	19.3555	18.9931	18.0608	19.1675	18.8277	19.239	13.6077	0.287062	1.76552	1.84152	1.58302	0.802066	1.68763	2.68885	4.36696	0.330163	4.10079	4.34468	3.52214	1.31699	3.85242	7.06732	11.864	0	1	1	1	0	1	1	1
5153	330.564	8.90774	Positive	NA	Unknown	17.7833	17.0379	16.9683	15.2165	15.4189	14.687	13.9652	7.71129	20.8176	19.2266	18.872	17.8204	15.751	14.2114	14.2493	7.17204e-14	-3.03425	-2.18868	-1.90362	-2.60394	-0.332106	0.47559	-0.28413	7.71129	1.26559	0.798065	0.659444	1.01752	0.0818305	0.121386	0.0691772	4.80062	0	0	0	0	0	0	0	1
5157	95.0856	8.52161	Positive	NA	Unknown	18.1829	18.4608	18.5384	18.9671	18.7814	17.9494	17.3571	17.7729	19.2407	20.4551	20.2741	19.6385	18.5291	18.7565	17.2774	16.9479	-1.05786	-1.99431	-1.73573	-0.671344	0.252379	-0.807039	0.0797277	0.825013	1.1125	2.78894	2.28029	0.59333	0.176522	0.761493	0.0499289	0.784944	0	1	1	0	0	0	0	0
5158	217.117	1.12517	Positive	NA	Unknown	17.8669	16.1208	13.4705	15.4757	14.9456	15.6252	14.4665	3.89177	20.7719	19.6216	17.8733	19.9142	18.9834	16.7828	16.7918	13.028	-2.90495	-3.50073	-4.40279	-4.43848	-4.03784	-1.15754	-2.32525	-9.13621	0.955907	1.24634	1.73728	1.75784	1.53178	0.285697	0.702314	4.90337	0	0	0	0	0	0	0	1
5160	166.071	2.96831	Positive	NA	Unknown	20.1739	21.5037	20.2274	20.7563	20.9481	20.0073	21.3819	18.74	19.2855	19.9623	20.207	20.9586	20.6739	19.7212	17.715	18.6707	0.888413	1.54139	0.0203057	-0.202301	0.274194	0.286112	3.66691	0.0693041	0.558883	1.19718	0.00879442	0.0955958	0.133938	0.14052	4.16495	0.0307417	0	0	0	0	0	0	1	0
5168	164.037	8.27297	Positive	NA	Unknown	21.0281	21.4222	21.8585	21.157	19.3792	19.4098	15.4033	13.0546	18.4169	19.1983	20.1952	19.7155	17.5081	15.6672	12.0188	12.5936	2.61125	2.22395	1.66332	1.44153	1.87114	3.74265	3.38445	0.461009	4.47206	3.58197	2.36113	1.91655	2.80021	7.09012	6.27081	0.3965	1	1	1	0	1	1	1	0
5172	263.006	1.95751	Positive	NA	Unknown	13.326	12.9884	13.7222	14.9618	18.3753	17.398	19.4088	20.5503	12.6682	12.2593	12.6021	17.1907	18.9972	20.1135	20.7581	21.2144	0.657843	0.729049	1.12012	-2.22892	-0.621874	-2.71557	-1.34931	-0.66413	0.607348	0.697785	1.27451	3.45042	0.563467	4.53545	1.66894	0.615142	0	0	0	1	0	1	0	0
5173	297.038	2.25869	Positive	NA	Unknown	19.3861	19.3204	18.8609	18.5516	18.2995	17.2796	15.4711	16.0493	19.6607	20.117	19.242	19.4593	19.0966	16.813	12.6949	16.1321	-0.274591	-0.796566	-0.381097	-0.907734	-0.797122	0.46657	2.77619	-0.0828358	0.226048	0.891572	0.336654	1.07178	0.892442	0.434877	5.25844	0.0594504	0	0	0	0	0	0	1	0
5174	373.126	8.09253	Positive	NA	Unknown	16.6042	16.4563	20.0747	19.94	19.6394	19.5378	19.7305	14.764	17.9572	19.0546	20.4225	20.3895	19.9893	17.298	15.788	7.63248	-1.35299	-2.59822	-0.347864	-0.449491	-0.349924	2.23975	3.94254	7.1315	0.433018	1.04717	0.088178	0.116882	0.0887463	0.850078	1.9121	4.45378	0	0	0	0	0	0	0	1
5175	231.169	7.21909	Positive	NA	Unknown	17.3333	17.188	14.1	13.6097	16.5223	16.8268	17.604	17.1178	18.5972	19.2852	19.4145	18.6596	18.486	18.6421	18.2993	17.0216	-1.26383	-2.09722	-5.31451	-5.04991	-1.96367	-1.8153	-0.695337	0.0962372	1.2204	2.5467	8.63133	8.15195	2.31453	2.06413	0.534937	0.0540421	0	1	1	1	1	1	0	0
5178	162.528	2.75844	Positive	NA	Unknown	16.8187	20.0011	19.2885	18.8788	19.4816	19.7016	19.4639	16.9682	20.7971	20.2947	18.2148	19.8612	19.6256	19.183	15.0362	14.7678	-3.97837	-0.293634	1.07368	-0.982454	-0.143976	0.518566	4.42769	2.2004	2.72621	0.0946926	0.435024	0.388404	0.0442355	0.179361	3.17887	1.15463	1	0	0	0	0	0	1	0
5184	297.093	7.68061	Positive	NA	Unknown	12.0706	12.3483	13.1275	14.5526	14.8386	14.8191	15.5026	20.1121	8.25564	16.0008	18.586	18.1364	20.3312	20.0381	20.1123	20.0751	3.815	-3.65246	-5.45857	-3.58387	-5.49267	-5.21903	-4.60966	0.0370373	1.25578	1.17977	2.11301	1.14822	2.13229	1.97911	1.65141	0.00668461	0	0	1	0	1	1	0	0
5185	266.101	8.4335	Positive	NA	Unknown	19.4672	19.2092	18.6505	17.461	16.6879	15.6775	12.6376	18.0608	20.2003	20.003	19.4184	19.8778	17.4517	14.3965	12.0894	13.5398	-0.733102	-0.793839	-0.767838	-2.41684	-0.763777	1.28096	0.548163	4.52102	0.610348	0.67953	0.649572	3.33658	0.64494	1.32991	0.417101	7.57061	0	0	0	1	0	0	0	1
5188	570.215	8.07264	Positive	NA	Unknown	18.3479	19.8215	21.2684	20.9334	20.424	19.8436	19.1648	11.2899	19.1647	19.3308	20.5398	20.2545	20.089	17.3863	15.83	3.58773	-0.816821	0.490727	0.728685	0.678881	0.335009	2.45731	3.33489	7.70215	0.264934	0.145999	0.231023	0.212441	0.0954576	1.13172	1.7595	5.70364	0	0	0	0	0	0	0	1
5189	229.973	1.78142	Positive	NA	Unknown	20.0687	20.7588	20.336	20.4658	20.7611	19.8676	17.6748	18.5845	19.3741	19.2884	19.5198	20.0082	20.1932	19.7073	19.2556	19.0805	0.694559	1.47042	0.816134	0.45766	0.567886	0.160306	-1.58078	-0.495986	1.04441	3.09064	1.31534	0.587909	0.787984	0.161453	3.42569	0.654968	0	1	0	0	0	0	1	0
5197	330.116	7.43228	Positive	NA	Unknown	20.4907	21.1499	21.184	20.3006	18.0521	16.5209	14.4375	11.7892	18.8987	19.3499	20.0146	19.2097	17.8741	14.1875	10.8032	3.47939	1.592	1.80002	1.16938	1.09087	0.177973	2.33341	3.63425	8.30983	0.59135	0.697859	0.395642	0.36238	0.0467316	1.00039	1.8948	6.00711	0	0	0	0	0	0	0	1
5203	149.041	6.44018	Positive	NA	Unknown	17.8126	18.4943	19.6212	18.8921	18.3176	16.6006	15.3192	16.301	17.4686	19.3958	19.8105	19.6432	19.2337	16.5494	15.3788	14.0524	0.343967	-0.901565	-0.189245	-0.751065	-0.916102	0.0512008	-0.0595638	2.24854	0.20797	0.703177	0.10546	0.55019	0.718691	0.0264274	0.0308901	2.59832	0	0	0	0	0	0	0	1
5204	244.059	7.02915	Positive	NA	Unknown	11.0228	13.3177	13.7183	12.9722	13.2023	11.8865	3.53802	7.62913	15.3693	19.2123	19.8345	19.3617	18.4052	17.4767	15.3023	-2.57572e-14	-4.34643	-5.89457	-6.11627	-6.38953	-5.20284	-5.59024	-11.7642	7.62913	1.40317	2.18635	2.30715	2.45853	1.82239	2.0237	5.72477	3.17412	0	1	1	1	0	1	1	1
5206	122.034	2.22807	Positive	NA	Unknown	17.8886	17.6146	18.4003	18.5628	18.9156	19.3378	19.8434	19.8036	17.8314	17.6395	17.4704	17.8346	18.1714	19.4224	20.1965	18.5267	0.0572075	-0.0249326	0.92992	0.728167	0.744152	-0.0846249	-0.353088	1.27683	0.0448588	0.0190255	1.2858	0.908396	0.936471	0.0678881	0.348106	2.038	0	0	0	0	0	0	0	1
5210	540.241	8.63722	Positive	NA	Unknown	18.1027	19.0882	19.2927	18.8386	18.4538	17.8032	16.6572	1.85407e-14	19.2111	19.2751	19.5	19.0019	18.4191	16.3145	12.6631	-6.20615e-14	-1.10841	-0.186938	-0.20736	-0.163274	0.0346619	1.4887	3.9941	8.06022e-14	1.3029	0.134786	0.151569	0.115855	0.0224793	2.00004	7.62846	0	0	0	0	0	0	1	1	0
5211	100.023	1.7659	Positive	NA	Unknown	18.9551	19.1896	18.4179	19.1417	19.6718	18.2728	16.9333	18.6161	19.0578	19.1826	18.2193	19.9134	19.5943	18.661	19.0242	18.6319	-0.102684	0.00706495	0.198584	-0.771714	0.0775256	-0.38825	-2.09084	-0.0157857	0.0781885	0.0049887	0.162542	0.903484	0.05789	0.362796	3.7871	0.0112251	0	0	0	0	0	0	1	0
5212	241.104	7.05426	Positive	NA	Unknown	18.5915	18.718	18.9773	18.5691	19.2618	21.0028	20.8501	21.3592	18.3232	18.7118	19.0892	17.8185	17.9472	18.2922	19.8154	20.8698	0.26821	0.0061938	-0.111991	0.750556	1.31453	2.71059	1.03468	0.489414	0.179143	0.00351763	0.0680415	0.646087	1.41851	4.02284	1.00696	0.369913	0	0	0	0	0	1	0	0
5214	175.025	0.678344	Positive	NA	Unknown	14.8858	13.9696	14.494	15.744	17.9404	19.3915	18.399	13.9187	14.9507	17.1842	17.7177	15.8446	18.1926	16.5424	17.7395	15.3939	-0.0649328	-3.21461	-3.2237	-0.100667	-0.252206	2.84909	0.659511	-1.47522	0.0213422	2.28518	2.2946	0.0335201	0.0886388	1.91637	0.2656	0.749439	0	1	1	0	0	0	0	0
5215	169.554	7.14352	Positive	NA	Unknown	17.2887	16.5791	17.9535	17.8033	16.2746	15.6192	16.7691	17.7961	19.619	19.6964	19.6729	18.9629	17.8618	16.2867	15.7145	14.9338	-2.33034	-3.11731	-1.71933	-1.15964	-1.58726	-0.667512	1.05465	2.86238	3.01196	4.52317	1.93757	1.09624	1.72439	0.5143	0.958477	4.02493	1	1	0	0	0	0	0	1
5218	285.038	10.4212	Positive	NA	Unknown	22.6097	24.4189	23.2412	24.0292	24.3501	24.8875	23.3109	19.9255	9.43078	14.157	17.0832	16.9179	19.0294	18.2548	14.5918	17.1872	13.1789	10.262	6.15802	7.11132	5.32069	6.63271	8.71909	2.73834	5.89154	4.23227	2.04065	2.51633	1.64899	2.27395	3.3719	0.645989	1	1	1	1	0	1	1	0
5219	260.112	7.34758	Positive	NA	Unknown	20.786	20.7693	20.3819	18.7547	16.5026	13.248	12.9603	15.2141	19.9485	19.7522	19.9678	18.9112	17.2776	15.838	12.7634	12.329	0.837486	1.01712	0.414097	-0.156528	-0.775041	-2.59005	0.196925	2.88506	0.742905	0.973344	0.297954	0.0970225	0.668444	3.74007	0.125085	4.34103	0	0	0	0	0	1	0	1
5222	476.211	9.44008	Positive	NA	Unknown	18.8414	18.5547	18.3188	17.3607	16.6238	16.5712	11.9795	1.55431e-15	20.2228	19.4135	19.9776	19.0378	17.4971	16.1463	4.40053	1.26565e-14	-1.3814	-0.858796	-1.65875	-1.67703	-0.873237	0.424905	7.579	-1.11022e-14	0.397749	0.222062	0.503659	0.510945	0.226498	0.0997472	4.29657	0	0	0	0	0	0	0	1	0
5225	256.101	0.920947	Positive	NA	Unknown	18.6375	18.2472	18.213	20.2858	20.4018	19.3721	18.3256	19.3411	14.9631	16.643	18.2692	19.0007	20.0675	20.6104	18.7706	20.9524	3.67435	1.60419	-0.0561879	1.28504	0.334252	-1.23828	-0.445078	-1.61131	2.61593	0.795386	0.0176623	0.588486	0.115531	0.560164	0.159521	0.800265	1	0	0	0	0	0	0	0
5228	261.027	2.28451	Positive	NA	Unknown	19.1056	19.2917	19.8147	17.8571	18.1015	17.8296	14.5229	14.9527	19.0198	19.5079	19.9738	18.5704	18.5651	18.182	14.8413	18.0197	0.0858069	-0.216179	-0.15903	-0.713339	-0.463579	-0.352373	-0.318475	-3.06694	0.0400849	0.107692	0.0770458	0.443159	0.25902	0.187208	0.166554	3.44232	0	0	0	0	0	0	0	1
5229	179.09	1.39745	Positive	NA	Unknown	18.684	18.723	18.3009	16.2746	16.676	15.6415	17.3618	16.2896	20.7871	19.9149	18.9874	19.1313	18.2812	16.228	15.5508	15.4417	-2.10309	-1.19194	-0.686517	-2.85671	-1.60516	-0.586496	1.81099	0.847878	1.90971	0.846278	0.405719	2.9787	1.29005	0.33277	1.53598	0.533449	0	0	0	1	0	0	0	0
5232	344.241	10.8649	Positive	NA	Unknown	11.488	12.3685	15.962	16.2026	19.2243	22.7916	25	20.4959	15.6752	17.32	19.6649	18.4825	18.643	19.0565	20.5359	15.4887	-4.18718	-4.95143	-3.7029	-2.27991	0.581286	3.73513	4.46413	5.00715	5.32309	6.5819	4.52068	2.2735	0.345413	4.57394	5.78161	6.67265	1	1	1	1	0	1	1	1
5235	206.065	2.64687	Positive	NA	Unknown	20.1235	20.9248	21.6419	21.5779	21.6954	22.1972	20.4056	20.9434	17.0427	18.8408	20.2482	20.7705	20.8767	19.8865	18.5571	15.8842	3.08079	2.08393	1.3937	0.807423	0.818635	2.31067	1.84851	5.05926	9.72895	6.20813	3.63043	1.65	1.68347	7.04471	5.32688	15.3345	1	1	1	0	0	1	1	1
5236	196.095	7.4875	Positive	NA	Unknown	16.3455	18.6173	17.8946	16.2886	16.484	15.2681	17.3719	18.8026	19.482	17.5062	18.8174	20.0909	19.7186	18.2988	17.0445	17.383	-3.1365	1.11107	-0.922758	-3.80229	-3.23459	-3.03069	0.327395	1.4196	2.24506	0.520662	0.409339	2.9666	2.34799	2.13554	0.119758	0.723224	1	0	0	1	1	1	0	0
5239	179.069	8.1692	Positive	NA	Unknown	19.8014	20.6011	20.2963	20.6275	20.5376	19.6077	18.4407	19.255	19.7599	20.007	19.9483	21.2343	19.2552	19.5648	18.3292	16.491	0.0414449	0.594132	0.34805	-0.606869	1.28243	0.0429213	0.11149	2.76402	0.0226363	0.438531	0.226552	0.45069	1.25488	0.0234636	0.0634966	3.80163	0	0	0	0	0	0	0	1
5242	138.008	3.52251	Positive	NA	Unknown	13.3271	16.0323	17.6314	18.4326	14.7124	11.6247	13.8222	12.7129	19.8336	21.3128	20.5391	19.8921	17.7081	16.3037	4.36142	-7.51621e-14	-6.50642	-5.28044	-2.90776	-1.45951	-2.99577	-4.67896	9.46075	12.7129	3.21713	2.3811	1.00487	0.398032	1.04819	1.99638	5.37206	7.7297	1	1	0	0	0	1	1	1
5244	110.033	0.653999	Positive	NA	Unknown	22.9663	23.4111	23.3797	22.4966	21.0525	20.4047	20.8293	14.5235	23.09	23.4608	23.3255	22.4266	21.5422	19.6945	17.9595	13.4034	-0.123685	-0.049699	0.0541913	0.0700304	-0.489661	0.710219	2.86979	1.1201	0.0544192	0.0211236	0.0230818	0.0300512	0.252945	0.400608	2.81496	0.731101	0	0	0	0	0	0	1	0
5251	413.212	9.80877	Positive	NA	Unknown	21.5614	21.4321	20.8664	19.8945	18.7464	17.9917	17.9	13.8168	20.6338	19.9922	19.2131	18.8889	18.0453	16.756	13.1974	10.3752	0.927568	1.43986	1.65331	1.00556	0.701096	1.23565	4.70257	3.44156	0.960469	1.80781	2.21165	1.07663	0.652743	1.4473	8.80867	6.09947	0	0	1	0	0	0	1	1
5252	535.2	8.88615	Positive	NA	Unknown	20.7538	22.9379	23.0359	21.9248	21.3882	21.3235	19.4728	14.7466	16.3103	19.2818	20.0075	19.4563	19.2831	17.1365	14.0499	6.08402e-14	4.44346	3.65609	3.02838	2.46851	2.1051	4.18702	5.42299	14.7466	8.59433	6.85558	5.41202	4.11554	3.29305	8.03925	10.6018	22.9062	1	1	1	1	1	1	1	1
5255	179.031	2.68382	Positive	NA	Unknown	17.5617	16.9625	16.6258	19.023	20.3252	18.8142	19.4721	18.2516	14.3318	17.9243	18.7439	21.2449	20.3696	20.3044	19.7926	19.4053	3.22987	-0.961764	-2.11803	-2.22187	-0.044384	-1.49016	-0.320575	-1.15372	2.73207	0.495127	1.47866	1.58507	0.0163321	0.895409	0.13169	0.630271	1	0	0	0	0	0	0	0
5256	253.127	3.34297	Positive	NA	Unknown	19.9182	20.1437	20.1671	19.2147	19.2588	19.5937	21.7297	18.3752	18.0425	18.6488	17.0792	18.171	20.3119	18.2799	20.3351	11.8744	1.8757	1.49494	3.08791	1.04368	-1.05309	1.31382	1.39454	6.5008	0.851581	0.624368	1.73746	0.390522	0.394997	0.525806	0.568959	4.99861	0	0	0	0	0	0	0	1
5258	264.049	2.76178	Positive	NA	Unknown	10.543	19.8878	17.4532	16.8441	18.3872	19.0461	18.3642	12.776	21.2756	19.9981	16.8046	19.0879	18.3183	17.4619	9.76574	4.19501	-10.7327	-0.11036	0.648692	-2.24387	0.0689157	1.58417	8.59849	8.58099	2.68022	0.0120023	0.0752728	0.310812	0.00745696	0.204507	1.94132	1.93555	1	0	0	0	0	0	0	0
5260	449.106	9.20964	Positive	NA	Unknown	21.3786	20.76	20.4817	19.14	18.4724	18.2281	16.6838	14.1031	20.7662	17.8921	18.1999	16.7867	16.1323	13.0549	15.5044	7.0526	0.61244	2.86788	2.28183	2.35331	2.3401	5.17324	1.17936	7.05052	0.163679	1.18668	0.859163	0.896944	0.889918	2.79323	0.358684	4.3201	0	0	0	0	0	1	0	1
5261	232.055	7.42159	Positive	NA	Unknown	3.59193	-7.10543e-15	3.87044	12.8298	15.4763	17.9518	19.727	16.6554	18.7559	17.8674	18.0057	19.1021	19.1812	19.7267	16.3565	10.3575	-15.164	-17.8674	-14.1352	-6.27231	-3.70493	-1.7749	3.37047	6.29793	7.54672	9.07554	6.94332	2.29679	1.07157	0.397389	0.937539	2.31045	1	1	1	1	0	0	0	1
5271	123.026	1.78237	Positive	NA	Unknown	18.8886	19.2214	18.1962	18.9409	19.563	18.3788	17.4154	18.8635	18.7671	19.1781	18.2429	19.7349	19.4451	18.2803	19.101	18.3361	0.121473	0.043302	-0.0466904	-0.793973	0.117901	0.0984524	-1.68555	0.52736	0.0757388	0.0256739	0.0277442	0.715129	0.0733454	0.0604919	2.0928	0.416382	0	0	0	0	0	0	1	0
5274	407.114	1.81645	Positive	NA	Unknown	17.5711	18.5707	17.7705	19.2189	19.4689	18.9447	17.2552	14.5135	19.6118	19.9046	19.1822	20.1243	19.3346	18.7603	15.9831	15.8002	-2.04072	-1.33392	-1.41168	-0.905399	0.13436	0.18435	1.27213	-1.28667	2.06501	1.11563	1.20973	0.65112	0.0680629	0.0958323	1.0429	1.05985	1	0	0	0	0	0	0	0
5275	177.122	2.29907	Positive	NA	Unknown	16.6982	17.1491	15.5586	18.2263	18.0642	17.2795	13.1873	17.3167	18.2375	18.3433	18.0521	20.3271	19.5229	18.8839	16.7983	16.6149	-1.5393	-1.19413	-2.49351	-2.10073	-1.45874	-1.60436	-3.61101	0.701759	0.928699	0.654571	1.85775	1.44777	0.861486	0.98438	3.17731	0.328757	0	0	0	0	0	0	1	0
5278	246.027	1.67367	Positive	NA	Unknown	19.8436	19.4681	19.514	18.1116	17.0022	13.822	14.1724	14.2804	19.9113	19.6919	18.8538	19.1032	17.9908	14.4977	13.2377	12.1098	-0.0676761	-0.223785	0.660209	-0.991605	-0.988607	-0.675693	0.934674	2.17064	0.0377893	0.136935	0.506876	0.879074	0.875368	0.522542	0.809737	2.71913	0	0	0	0	0	0	0	1
5280	149.041	7.33569	Positive	NA	Unknown	16.2885	16.9617	18.0266	16.7831	15.5916	14.099	15.6789	19.1673	19.0123	20.2979	19.0376	18.8917	17.5227	16.9754	16.9498	18.404	-2.72389	-3.33618	-1.01093	-2.10861	-1.93114	-2.87639	-1.27092	0.76335	2.96608	3.95001	0.717233	2.04606	1.79978	3.20637	0.985567	0.492814	1	1	0	1	0	1	0	0
5282	239.089	7.94495	Positive	NA	Unknown	20.0788	21.9414	21.7517	23.0194	23.3141	22.5409	21.4999	19.6868	17.7077	18.5762	18.8144	19.881	20.4416	18.4704	17.6751	16.1115	2.37113	3.36511	2.93731	3.13834	2.87256	4.07044	3.82481	3.57526	1.79447	2.98367	2.45169	2.6985	2.37354	3.90448	3.57916	3.25337	0	1	1	1	1	1	1	1
5283	182.138	4.19466	Positive	NA	Unknown	18.1806	19.8646	18.7515	17.4817	17.5989	17.2733	17.3665	19.1419	17.7967	20.1325	18.9418	19.0922	18.6322	18.0128	17.9983	21.6831	0.383853	-0.267873	-0.190317	-1.61052	-1.0333	-0.739419	-0.631847	-2.54125	0.263054	0.172105	0.116908	1.81522	0.95877	0.605393	0.491752	3.50853	0	0	0	0	0	0	0	1
5289	198.991	1.74277	Positive	NA	Unknown	17.9497	18.5535	17.8695	18.9728	19.764	17.0757	17.3545	14.011	15.3748	16.3598	17.9346	19.9922	20.08	19.5748	17.6626	16.9645	2.57488	2.19375	-0.0650168	-1.0194	-0.315955	-2.49912	-0.308114	-2.95358	2.12529	1.68252	0.0254976	0.573881	0.137635	2.03471	0.133794	2.59466	1	0	0	0	0	1	0	1
5290	203.598	10.8257	Positive	NA	Unknown	0	11.4162	15.3093	15.0007	19.0381	22.5974	24.1254	20.2818	13.7159	16.5013	19.4773	17.6566	18.1807	18.876	20.2006	12.8244	-13.7159	-5.08515	-4.16805	-2.65588	0.857418	3.72137	3.9248	7.4574	14.5636	4.99492	3.81037	1.99372	0.415377	3.24792	3.50225	8.01891	1	1	1	1	0	1	1	1
5291	199.069	1.2721	Positive	NA	Unknown	12.736	12.8261	7.57662	13.0695	15.7663	13.7978	13.6461	18.4161	14.7196	19.3992	17.5556	20.5323	17.7679	20.8526	20.4297	19.6156	-1.98358	-6.57306	-9.97895	-7.46285	-2.00165	-7.05477	-6.78366	-1.19958	0.468947	2.52277	4.54576	3.0297	0.474503	2.79448	2.64071	0.250369	0	1	1	1	0	1	1	0
5293	345	2.75895	Positive	NA	Unknown	16.843	20.0937	18.5531	18.1522	19.2423	19.7181	19.3928	16.7807	20.8231	19.8341	18.2698	19.3922	19.3818	18.8874	14.4027	14.8894	-3.98006	0.259598	0.28333	-1.23993	-0.139515	0.830687	4.99012	1.89132	2.82005	0.0849043	0.0933886	0.540804	0.0438461	0.323961	3.8863	0.962491	1	0	0	0	0	0	1	0
5295	275.199	10.9002	Positive	NA	Unknown	11.3305	10.6551	12.4885	12.9193	18.5885	21.8634	23.9306	21.1932	15.8628	18.0808	21.061	18.0476	16.9415	17.7097	20.0084	14.8755	-4.53233	-7.42577	-8.57258	-5.12821	1.64702	4.15368	3.92224	6.31771	3.24651	6.30447	7.49832	3.86305	0.759859	2.86543	2.63789	5.12577	1	1	1	1	0	1	1	1
5298	176.054	2.12243	Positive	NA	Unknown	20.9561	21.2301	21.7064	20.8997	20.23	20.775	18.8197	14.1819	19.5137	19.6181	20.2963	20.0737	18.8744	17.9504	18.436	11.8233	1.44239	1.61203	1.4101	0.825981	1.35564	2.82459	0.383748	2.35862	2.92105	3.423	2.82742	1.30001	2.67118	7.15958	0.454299	5.72947	1	1	1	0	1	1	0	1
5303	192.122	1.09401	Positive	NA	Unknown	17.4639	17.8934	17.5425	18.6543	18.4462	16.2008	16.0102	18.0672	17.7512	19.3021	20.8229	21.412	20.7016	20.4322	18.5338	18.0496	-0.287346	-1.4087	-3.28042	-2.75769	-2.25539	-4.23144	-2.52364	0.0175989	0.10917	0.763327	2.566	1.99309	1.48717	3.69121	1.75122	0.0060359	0	0	1	1	0	1	0	0
5304	244.534	1.05831	Positive	NA	Unknown	17.7169	18.3928	18.3761	17.2389	14.2802	13.5418	14.827	3.59712e-14	18.9576	19.2667	17.9229	16.4553	13.7854	11.9315	8.11125	8.65974e-14	-1.24066	-0.873917	0.453233	0.783596	0.494734	1.61022	6.71576	-5.06262e-14	0.363376	0.236622	0.111436	0.207937	0.122839	0.507812	3.82112	0	0	0	0	0	0	0	1	0
5305	133.028	3.64313	Positive	NA	Unknown	19.2887	21.9356	21.4594	22.8275	22.7641	22.6395	21.9208	20.5001	14.6012	16.2061	17.9772	20.4739	20.8	19.8519	19.0193	18.4878	4.68751	5.72945	3.48217	2.35354	1.96415	2.78758	2.90152	2.01236	2.61868	3.49027	1.69859	0.967583	0.752389	1.23091	1.3039	0.777904	1	1	0	0	0	0	0	0
5306	443.095	7.13319	Positive	NA	Unknown	23.9559	24.2726	24.4517	23.5537	23.5175	23.6567	21.1174	-3.64153e-14	19.8939	19.2324	18.6915	16.5361	17.0069	7.68213	8.64103	2.75335e-14	4.06204	5.04016	5.76013	7.0176	6.51063	15.9745	12.4764	-6.39488e-14	1.01198	1.37783	1.67241	2.23044	1.99942	6.85939	5.01351	0	0	0	0	1	1	1	1	0
5307	450.174	7.76726	Positive	NA	Unknown	19.2603	19.1486	20.3751	19.5586	16.8683	7.841	7.27797	3.5833	18.3631	19.1127	20.2783	19.1657	18.4375	18.6243	19.0128	7.54952e-15	0.897212	0.0359603	0.0967554	0.392862	-1.56911	-10.7833	-11.7348	3.5833	0.150079	0.00524234	0.0142481	0.0607159	0.289772	4.12957	4.6335	0.85143	0	0	0	0	0	1	1	0
5309	116.528	4.16219	Positive	NA	Unknown	16.9564	18.6104	17.1802	17.8052	20.005	19.6484	18.1004	18.718	16.8112	17.5423	18.8133	20.5279	19.6275	19.4879	18.8797	21.0439	0.145125	1.06804	-1.63309	-2.72267	0.377443	0.160519	-0.779237	-2.32594	0.0773611	0.865426	1.58686	3.32832	0.226997	0.0862806	0.563495	2.65552	0	0	0	1	0	0	0	1
5310	186.007	1.27593	Positive	NA	Unknown	12.4101	13.1708	12.8778	16.8629	19.004	16.6762	18.7872	20.2785	12.8701	14.3914	14.0012	19.4951	19.1615	17.3655	19.3515	21.0941	-0.459962	-1.22061	-1.12334	-2.63218	-0.157499	-0.689306	-0.564365	-0.815537	0.263315	0.940793	0.837771	2.85362	0.0780314	0.435907	0.338424	0.542763	0	0	0	1	0	0	0	0
5311	245.185	8.06512	Positive	NA	Unknown	16.8345	15.0895	12.5365	13.383	16.701	16.5334	16.331	14.4348	18.1141	19.1731	19.4445	18.419	18.2867	18.4338	16.1829	12.9964	-1.27954	-4.08362	-6.90801	-5.03597	-1.58565	-1.9004	0.148078	1.43845	0.885439	4.64792	8.85555	6.10682	1.19949	1.55786	0.0662724	1.04398	0	1	1	1	0	0	0	0
5312	150.127	7.34796	Positive	NA	Unknown	18.7243	18.637	19.3206	19.011	19.0567	18.6736	19.2209	19.9324	19.2681	19.364	19.1743	19.5323	19.2396	17.6088	17.6845	18.5241	-0.543789	-0.727012	0.146272	-0.521393	-0.182874	1.06476	1.53644	1.40834	0.528628	0.78195	0.109625	0.50023	0.140709	1.34087	2.28602	2.01356	0	0	0	0	0	0	1	1
5315	233.549	6.63375	Positive	NA	Unknown	17.848	17.4811	21.6336	18.3489	17.4383	17.8813	18.1656	16.396	19.7256	20.211	19.7137	17.8218	17.1593	17.4213	14.0229	-3.90799e-14	-1.87761	-2.72993	1.91999	0.527152	0.278969	0.460001	4.14275	16.396	2.39967	4.08838	2.47875	0.408816	0.188512	0.344227	7.01849	22.9136	1	1	1	0	0	0	1	1
5317	261.093	1.86043	Positive	NA	Unknown	21.1696	21.3411	21.3454	20.4446	20.044	19.7789	20.7716	17.0575	22.0775	21.5466	20.4379	20.2685	19.5415	16.5944	19.2402	14.2777	-0.907886	-0.205463	0.907512	0.176061	0.502527	3.18459	1.53143	2.77981	0.755205	0.121464	0.754778	0.102367	0.347743	4.52179	1.5862	3.75031	0	0	0	0	0	1	0	1
5319	138.523	1.88747	Positive	NA	Unknown	16.7001	18.0911	17.7412	19.318	18.9592	18.4065	19.6076	21.0851	16.777	17.6451	16.1599	17.3898	19.6411	20.4827	20.91	21.2492	-0.0769303	0.446021	1.58123	1.92825	-0.681937	-2.07626	-1.30241	-0.164054	0.0376659	0.262433	1.41689	1.89088	0.4457	2.10631	1.07267	0.0840582	0	0	0	0	0	1	0	0
5320	215.09	7.1411	Positive	NA	Unknown	20.5185	21.0187	20.7361	20.4584	20.1557	19.632	19.4416	19.5058	20.1391	20.2035	20.5391	21.019	20.4727	18.0236	17.1938	16.7418	0.37948	0.815213	0.197032	-0.560604	-0.316924	1.60835	2.24784	2.76403	0.387248	1.08438	0.175505	0.645091	0.309207	2.90146	4.63294	6.06629	0	0	0	0	0	1	1	1
5327	321.095	8.70872	Positive	NA	Unknown	20.1794	18.2315	20.135	20.0126	19.9798	19.292	18.2581	16.3266	21.5727	19.9879	19.2125	19.0725	18.485	16.2061	15.2723	13.6545	-1.39333	-1.75637	0.922547	0.940049	1.49479	3.08591	2.98582	2.6721	1.38911	1.94532	0.775221	0.795578	1.53805	4.35022	4.15825	3.56311	0	0	0	0	0	1	1	1
5328	220.153	3.79971	Positive	NA	Unknown	19.4527	20.2615	20.6572	19.5802	19.0217	18.551	18.8407	19.0942	19.4354	20.5526	20.509	19.9506	19.2385	18.0138	17.5669	15.7067	0.0172692	-0.291136	0.148246	-0.370421	-0.216805	0.537212	1.2738	3.38752	0.0107276	0.216894	0.100721	0.28968	0.154074	0.462417	1.52522	6.02269	0	0	0	0	0	0	0	1
5329	125.515	1.11742	Positive	NA	Unknown	21.3021	21.9379	22.4794	20.7985	21.5244	22.0031	22.9824	23.0587	21.0089	20.6217	20.3592	21.0848	22.061	22.1203	22.5659	23.1817	0.293165	1.31611	2.12025	-0.286351	-0.536618	-0.117245	0.416547	-0.123076	0.155513	1.04845	2.08919	0.1514	0.318466	0.0570054	0.234182	0.060018	0	0	1	0	0	0	0	0
5337	277.069	8.15381	Positive	NA	Unknown	20.676	22.501	22.1901	23.241	23.1369	22.8713	21.4034	20.2624	8.46041	11.8738	15.6153	18.9671	19.9445	16.038	15.482	13.5434	12.2156	10.6271	6.57475	4.27386	3.19244	6.83332	5.9214	6.71902	6.6353	5.56981	2.87765	1.53832	1.01208	3.04146	2.47356	2.9688	1	1	1	0	0	1	1	1
5338	170.052	6.99794	Positive	NA	Unknown	20.7193	21.1717	21.0193	22.3992	22.1525	21.7773	17.8546	18.9228	17.7017	18.5522	19.1375	19.5549	19.308	17.1918	15.5263	16.1618	3.01759	2.61944	1.88188	2.8443	2.84457	4.58542	2.32827	2.76097	3.80087	3.11221	1.92706	3.4983	3.49876	6.5956	2.62687	3.35426	1	1	0	1	1	1	1	1
5347	435.109	6.43337	Positive	NA	Unknown	9.31957	15.2194	16.0869	15.4176	15.7679	16.0729	16.1652	18.0681	16.6626	19.5909	19.9237	18.9601	18.1272	17.2443	17.6523	16.7128	-7.34306	-4.37151	-3.83683	-3.54258	-2.35931	-1.17137	-1.48713	1.35526	3.60614	1.70482	1.41057	1.25725	0.710721	0.28782	0.387298	0.344605	1	0	0	0	0	0	0	0
5353	226.001	1.28896	Positive	NA	Unknown	21.5926	21.6812	21.0203	20.0358	19.799	20.1822	19.7433	16.007	20.7731	20.9399	20.7731	20.4441	20.1176	20.2582	16.7841	16.4446	0.819568	0.74129	0.247207	-0.408298	-0.318576	-0.076012	2.95917	-0.437591	0.646086	0.564836	0.147513	0.265359	0.197563	0.0411786	4.02162	0.288677	0	0	0	0	0	0	1	0
5355	350.142	6.49101	Positive	NA	Unknown	19.1002	20.5889	21.4292	20.8574	19.6702	19.3837	17.3179	6.91327	18.5367	19.0889	19.4308	18.9163	18.5629	15.006	15.2483	10.4464	0.563519	1.49998	1.99835	1.94108	1.10736	4.37771	2.06952	-3.53316	0.174258	0.585056	0.865211	0.830928	0.394149	2.6776	0.908541	1.96037	0	0	0	0	0	1	0	0
5358	311.072	6.51213	Positive	NA	Unknown	19.9807	20.2046	21.1774	20.7501	21.1025	20.9708	22.2241	21.2257	21.5916	21.7132	21.1624	21.0565	21.2365	21.2271	21.3039	21.1415	-1.6109	-1.50864	0.014971	-0.306397	-0.13392	-0.256265	0.92024	0.08422	2.28793	2.07937	0.0097023	0.242718	0.0945043	0.19649	1.01814	0.0573847	1	1	0	0	0	0	0	0
5363	353.229	10.5182	Positive	NA	Unknown	14.7329	16.2839	16.0889	16.6009	17.2364	18.1582	19.4193	20.3481	19.4537	19.5609	19.4457	16.7314	14.7125	16.0908	17.8915	18.6601	-4.72077	-3.27703	-3.35686	-0.130513	2.52397	2.06736	1.52787	1.68796	4.18977	2.49584	2.58449	0.0458779	1.70601	1.27761	0.832881	0.957318	1	1	1	0	0	0	0	0
5366	111.531	1.77839	Positive	NA	Unknown	18.6967	18.9246	17.8259	18.9583	19.5373	18.1476	17.1498	18.5563	18.6928	18.9012	17.4633	19.7372	19.3937	18.1825	18.994	17.9782	0.00390988	0.023442	0.362602	-0.778907	0.143568	-0.0348436	-1.84412	0.578118	0.00213691	0.0129693	0.244642	0.646324	0.0854666	0.0194144	2.2009	0.436352	0	0	0	0	0	0	1	0
5367	266.101	8.80637	Positive	NA	Unknown	16.2856	16.2982	19.1246	17.6249	16.0445	11.8076	13.144	14.2829	18.0875	20.1231	20.649	19.3181	16.5545	15.9338	14.3321	11.5053	-1.80195	-3.82494	-1.52444	-1.69313	-0.50994	-4.1262	-1.18818	2.77768	1.62015	4.74074	1.27183	1.48001	0.294808	5.24163	0.893003	3.03761	0	1	0	0	0	1	0	1
5368	166.047	1.89356	Positive	NA	Unknown	14.8448	18.8945	13.3873	16.8073	17.685	14.5618	14.1171	18.0984	16.8382	17.4061	17.1567	20.3418	20.0878	18.8652	18.1296	14.3546	-1.99336	1.48834	-3.7694	-3.53443	-2.40281	-4.30344	-4.01256	3.74382	0.744738	0.503392	1.84588	1.68058	0.965548	2.2394	2.02215	1.82764	0	0	0	0	0	1	1	0
5369	190.07	2.46128	Positive	C7H11NO5	N-ACETYL-DL-GLUTAMIC ACID	21.5661	20.6404	20.2892	19.8941	19.4654	17.4868	14.8663	14.6909	21.0226	19.77	19.9468	20.1914	19.4325	18.1062	14.0809	12.1793	0.543468	0.870428	0.342453	-0.297312	0.0328948	-0.619341	0.78548	2.51158	0.54139	1.03233	0.300682	0.253228	0.0230972	0.644601	0.893451	4.70032	0	0	0	0	0	0	0	1
5375	365.084	8.00683	Positive	NA	Unknown	16.3254	18.3603	18.6598	19.6027	19.4343	18.8027	18.858	14.8761	19.8397	18.2154	19.1412	18.4586	17.5561	13.9911	11.6793	10.804	-3.51432	0.144893	-0.481395	1.14408	1.87819	4.81165	7.17874	4.07209	3.44404	0.0603049	0.230304	0.692091	1.39018	5.28777	8.58336	4.22844	1	0	0	0	0	1	1	1
5378	201.184	9.83049	Positive	NA	Unknown	20.3153	20.4907	20.5992	20.1525	18.8962	17.4365	17.7872	13.1966	19.1483	19.9691	19.6808	19.6947	18.445	16.371	8.0694	-6.43929e-15	1.16705	0.52164	0.918413	0.457807	0.451192	1.06544	9.71775	13.1966	0.322596	0.125435	0.241021	0.108492	0.106762	0.288402	5.97523	8.59297	0	0	0	0	0	0	1	1
5380	128.035	1.30178	Positive	NA	Unknown	19.981	19.0716	19.9215	17.7233	19.7068	19.5752	19.2401	18.161	20.0379	19.6069	18.7259	20.2013	19.0921	20.0366	18.6883	19.1209	-0.0569315	-0.535327	1.19559	-2.47801	0.614667	-0.461417	0.551768	-0.959914	0.028814	0.345951	1.00908	2.89537	0.411928	0.287947	0.359307	0.743239	0	0	0	1	0	0	0	0
5381	118.065	11.4868	Positive	NA	Unknown	19.4276	19.228	19.386	19.4545	19.4399	19.5711	19.7487	19.7091	18.8351	17.6285	19.2438	19.0947	19.0435	19.1675	19.6749	19.5511	0.59252	1.59947	0.142232	0.359769	0.39643	0.403562	0.0738065	0.158	0.733188	3.04334	0.126641	0.380194	0.430225	0.440202	0.0619756	0.142549	0	1	0	0	0	0	0	0
5385	402.158	1.49805	Positive	NA	Unknown	14.6967	17.7673	19.6795	19.6133	18.8098	17.8761	14.9917	11.4134	18.1941	18.9115	19.1662	20.728	19.4914	17.8815	14.2794	13.5407	-3.49741	-1.14418	0.513362	-1.11463	-0.681614	-0.00543289	0.712271	-2.12734	2.24475	0.469207	0.17625	0.45357	0.246016	0.001586	0.259381	1.09248	1	0	0	0	0	0	0	0
5387	172.044	1.2875	Positive	NA	Unknown	13.0445	14.1405	14.3389	16.9089	19.8178	19.5456	19.2989	19.2328	14.2357	15.2527	15.078	20.2798	20.2437	20.2552	19.5744	19.5935	-1.19119	-1.11214	-0.739159	-3.37094	-0.42589	-0.709629	-0.275515	-0.360666	1.15978	1.05176	0.598661	5.10696	0.295616	0.566992	0.176149	0.241732	0	0	0	1	0	0	0	0
5389	162.017	2.20361	Positive	NA	Unknown	21.2089	21.4275	20.681	19.8251	18.9963	17.3716	12.386	15.8586	18.2292	18.6728	18.654	19.3883	18.823	14.9629	13.5828	14.2293	2.97962	2.75464	2.02695	0.436857	0.173298	2.4087	-1.19683	1.62927	4.35328	3.90746	2.52409	0.306614	0.104964	3.23518	1.17487	1.83625	1	1	1	0	0	1	0	0
5393	360.127	8.11701	Positive	NA	Unknown	8.46998	11.6496	13.2178	14.8831	15.9584	15.7893	14.8991	11.7625	18.8122	18.6562	18.8331	18.6651	16.8598	14.6591	12.6009	4.44089e-15	-10.3422	-7.00663	-5.61526	-3.78198	-0.901328	1.13016	2.29824	11.7625	6.63083	3.98142	2.9117	1.63912	0.241787	0.318356	0.806072	7.72868	1	1	1	0	0	0	0	1
5395	174.123	6.07069	Positive	NA	Unknown	15.1422	16.4566	15.3831	14.3718	13.7952	17.499	18.893	19.8615	16.5941	18.5124	18.3339	17.331	16.0966	17.9156	19.4074	20.9823	-1.45195	-2.05582	-2.95079	-2.95921	-2.3014	-0.416644	-0.514467	-1.12078	1.30478	2.16328	3.63692	3.65149	2.54911	0.250108	0.323472	0.903158	0	1	1	1	1	0	0	0
5399	170.533	8.94494	Positive	NA	Unknown	17.6351	21.7617	21.4504	22.7617	22.9415	22.4863	22.1271	21.5707	12.585	13.6017	15.5469	18.801	19.2837	15.8043	15.648	3.57137	5.05009	8.15997	5.90348	3.96073	3.65786	6.68209	6.47911	17.9993	1.81814	3.63327	2.28305	1.27808	1.14037	2.73257	2.61337	9.71297	0	1	1	0	0	1	1	1
5403	239.105	13.2089	Positive	NA	Unknown	18.9659	19.4042	18.3574	16.7112	20.3384	20.4162	19.7966	10.6842	7.16332	16.2314	14.8058	19.6154	19.0937	20.4973	19.5586	11.0779	11.8026	3.17272	3.5516	-2.90421	1.24463	-0.0810353	0.237978	-0.393686	6.22659	0.979398	1.14944	0.865243	0.286259	0.0149055	0.0452013	0.0771508	1	0	0	0	0	0	0	0
5406	192.063	6.91814	Positive	NA	Unknown	17.4986	20.0914	19.7982	21.4011	21.1241	20.3421	18.4813	17.8772	13.1688	12.8621	16.5351	20.2205	20.0264	19.436	17.7627	16.3549	4.32985	7.22931	3.26304	1.18061	1.09762	0.906087	0.718628	1.52229	3.4917	6.8718	2.32525	0.552707	0.502127	0.392165	0.293769	0.779281	1	1	1	0	0	0	0	0
5412	283.19	1.45	Positive	NA	Unknown	18.4803	20.9681	17.9146	19.2559	20.0928	19.6006	20.0704	3.83996	12.6935	18.5259	7.55725	18.6335	17.381	19.2426	19.0788	3.86342	5.78674	2.44212	10.3574	0.622467	2.71181	0.357973	0.991671	-0.0234629	1.009	0.321378	2.34129	0.0676954	0.366262	0.0377846	0.112341	0.0023829	0	0	1	0	0	0	0	0
5413	160.982	1.80251	Positive	NA	Unknown	16.3693	19.309	17.7819	19.8407	20.5079	19.6405	14.8965	13.5584	11.9772	14.6156	17.2933	20.0736	20.0138	19.7718	17.6055	20.0024	4.3921	4.69332	0.488636	-0.232828	0.494089	-0.131335	-2.70905	-6.44409	2.60792	2.86999	0.144449	0.0640925	0.146278	0.035114	1.29196	4.47713	1	1	0	0	0	0	0	1
5415	211.106	6.67389	Positive	NA	Unknown	15.1452	17.0041	17.3669	18.2281	19.2544	19.7171	20.0149	19.6076	16.901	17.511	18.6215	20.2208	19.7275	19.1786	17.5451	14.4726	-1.75581	-0.50689	-1.25468	-1.99276	-0.473098	0.53846	2.46975	5.13503	2.36556	0.418339	1.45009	2.84145	0.383181	0.452132	3.85229	9.5386	1	0	0	1	0	0	1	1
5417	262.983	2.9523	Positive	NA	Unknown	20.4342	21.3789	21.439	20.7216	20.6086	19.2888	17.1789	17.4667	20.2769	20.5727	20.8924	20.5919	20.334	18.6572	15.9663	15.646	0.157264	0.806134	0.546641	0.129647	0.274603	0.631505	1.21257	1.82068	0.0967095	0.69785	0.41786	0.0783963	0.181015	0.503675	1.23639	2.23137	0	0	0	0	0	0	0	1
5421	272.184	8.25639	Positive	NA	Unknown	18.3311	16.8604	18.1189	18.0378	18.0915	17.1008	17.7144	17.9004	17.4556	18.4235	19.0583	19.2823	19.0254	18.6521	19.6058	17.8554	0.875504	-1.56307	-0.939429	-1.24449	-0.933944	-1.55127	-1.89142	0.0450636	1.21034	2.80721	1.33944	2.01593	1.32818	2.77672	3.68224	0.0356448	0	1	0	1	0	1	1	0
5425	232.012	1.78658	Positive	NA	Unknown	18.3666	19.0059	17.5673	18.3386	18.9905	17.7593	17.0011	18.5312	18.9561	18.8935	17.8426	19.1527	18.9849	17.6424	18.8412	18.325	-0.589485	0.112447	-0.275283	-0.814045	0.00565526	0.116958	-1.84009	0.206199	0.631812	0.0871033	0.240659	0.986074	0.00402444	0.0909145	3.20237	0.171464	0	0	0	0	0	0	1	0
5428	290.158	4.40936	Positive	NA	Unknown	21.2824	21.4582	20.4929	16.9957	11.586	6.59138	3.38398	7.05221	21.2942	21.6155	20.3625	15.6771	12.3431	12.1694	12.0171	13.4479	-0.0117913	-0.15738	0.130453	1.31858	-0.757181	-5.57807	-8.63315	-6.39571	0.00188085	0.025777	0.0212631	0.262893	0.137726	1.83579	3.45151	2.24112	0	0	0	0	0	0	1	1
5429	208.057	3.07457	Positive	NA	Unknown	13.9313	14.2025	13.5421	16.706	19.0649	20.0295	15.8968	17.7822	13.4793	13.6697	17.1183	20.979	20.3901	20.1534	18.4302	17.9312	0.452024	0.532797	-3.57619	-4.27302	-1.32512	-0.123886	-2.53344	-0.148965	0.124639	0.150019	1.7893	2.31963	0.450779	0.0312805	1.08774	0.0378731	0	0	0	1	0	0	0	0
5431	189.006	2.07181	Positive	NA	Unknown	18.7172	18.9122	19.7666	19.1304	18.3135	18.743	16.4494	17.4646	18.7541	19.6351	19.6584	19.111	18.0354	18.0377	17.4919	19.2803	-0.0369538	-0.722858	0.108183	0.0193324	0.27812	0.705258	-1.04246	-1.81569	0.0214267	0.614895	0.0656296	0.0110826	0.187023	0.594931	1.01887	2.2729	0	0	0	0	0	0	0	1
5432	240.083	7.1031	Positive	NA	Unknown	18.5025	18.4989	18.3668	17.8411	16.6326	15.7994	16.173	16.8162	19.2252	19.2895	19.4237	19.766	18.0315	14.9962	14.6358	13.2373	-0.722748	-0.790563	-1.0569	-1.92496	-1.39888	0.803202	1.53722	3.57883	0.558504	0.629589	0.938637	2.22859	1.40029	0.643186	1.60555	5.31299	0	0	0	1	0	0	0	1
5433	303.067	2.68723	Positive	NA	Unknown	10.5816	17.1552	18.0514	18.9474	19.1669	18.1535	16.9517	18.8146	17.1444	20.0713	18.8438	19.6694	20.0304	17.2636	18.2672	16.9475	-6.5628	-2.91608	-0.792343	-0.722024	-0.863496	0.889924	-1.31556	1.86706	2.26006	0.709653	0.141731	0.127654	0.156278	0.16176	0.255913	0.394509	1	0	0	0	0	0	0	0
5434	241.104	6.98897	Positive	NA	Unknown	17.8428	18.0343	18.3385	18.0768	18.7603	20.6857	20.6882	20.7864	17.9802	19.22	18.8193	17.7183	17.9582	18.6988	20.4207	19.2571	-0.137402	-1.18566	-0.480808	0.358471	0.802057	1.98698	0.267481	1.52925	0.0848057	1.22242	0.361722	0.252181	0.706893	2.58763	0.178568	1.76718	0	0	0	0	0	1	0	0
5440	135.116	9.02833	Positive	NA	Unknown	17.1276	17.7226	18.5123	17.1591	15.4219	15.7593	15.3346	16.3656	19.2309	20.5031	19.8884	18.1197	16.2079	14.3698	13.5057	13.424	-2.10329	-2.78055	-1.37609	-0.960582	-0.786033	1.38949	1.82887	2.94164	1.67496	2.51557	0.91199	0.55853	0.429927	0.924458	1.36745	2.72924	0	1	0	0	0	0	0	1
5443	234.989	2.12001	Positive	NA	Unknown	19.4434	19.2609	19.1001	17.8424	16.1949	16.069	17.5881	15.9469	19.8831	19.2617	18.7903	18.7381	16.7175	16.1104	14.7164	14.9471	-0.439746	-0.000724818	0.309824	-0.895618	-0.522589	-0.0414219	2.87171	0.999793	0.231781	0.000311553	0.154174	0.566466	0.285368	0.0181647	2.96093	0.656481	0	0	0	0	0	0	1	0
5445	191.142	8.97389	Positive	NA	Unknown	21.2644	21.526	21.5893	20.9878	20.3883	19.7354	19.8317	17.6731	20.1661	20.5387	20.6381	19.7281	19.1095	17.5427	15.8849	12.5335	1.09831	0.987366	0.951227	1.25976	1.27887	2.19272	3.94682	5.1396	0.961947	0.828957	0.787281	1.16861	1.19407	2.61203	5.8661	8.06502	0	0	0	0	0	1	1	1
5446	266.101	8.28303	Positive	NA	Unknown	21.4161	21.3792	18.9192	16.8854	16.0402	15.6775	12.5302	10.796	20.9445	20.0025	19.4122	15.5781	15.642	13.8602	11.1947	10.8498	0.471691	1.37669	-0.493006	1.30733	0.398224	1.81726	1.33542	-0.0538014	0.356675	1.53421	0.377075	1.42344	0.289236	2.29929	1.46794	0.0317654	0	0	0	0	0	1	0	0
5447	221.091	2.22183	Positive	NA	Unknown	14.8864	15.0853	8.47209	11.1358	14.1981	15.1753	16.28	6.67814	19.8329	19.8256	19.7214	19.5693	17.349	16.7005	15.5149	7.86873	-4.94652	-4.74035	-11.2493	-8.43353	-3.15097	-1.52519	0.765105	-1.19058	1.28134	1.20535	4.17798	2.78149	0.681087	0.268645	0.120756	0.200035	0	0	1	1	0	0	0	0
5451	294.153	2.59029	Positive	NA	Unknown	13.136	16.7935	15.2237	19.373	19.0816	18.7635	17.8892	16.996	14.3616	19.5033	18.8879	21.7347	19.9289	18.8422	18.6121	18.2538	-1.22567	-2.70978	-3.66419	-2.36167	-0.847257	-0.0787455	-0.722846	-1.25781	0.501325	1.50773	2.34013	1.23625	0.313583	0.0231248	0.258362	0.518637	0	0	1	0	0	0	0	0
5452	212.043	3.98511	Positive	NA	Unknown	17.1026	17.8962	19.5872	19.119	18.809	15.6867	6.74047	3.32092	19.6968	20.1077	19.134	20.9838	19.4047	17.2074	11.0959	9.82632	-2.59415	-2.21149	0.453259	-1.86473	-0.59573	-1.52072	-4.35547	-6.5054	0.691325	0.557946	0.0851161	0.44639	0.114886	0.344599	1.43442	2.57204	0	0	0	0	0	0	0	1
5454	203.138	6.68769	Positive	NA	Unknown	13.9517	14.8233	16.018	14.8557	13.949	13.8195	14.1887	15.2984	19.3767	19.1121	18.8719	18.0973	17.6748	17.2256	16.3581	14.6216	-5.42507	-4.2888	-2.85389	-3.24163	-3.72577	-3.40613	-2.16936	0.676805	6.76115	5.01509	2.84691	3.41493	4.14728	3.6615	1.91117	0.383305	1	1	1	1	1	1	0	0
5459	123.536	2.75782	Positive	NA	Unknown	19.3848	19.1113	20.4095	18.9141	16.7823	16.1996	15.6734	15.7327	19.1814	19.87	20.6766	20.1741	17.5127	17.2558	16.3318	18.3816	0.203416	-0.7587	-0.26708	-1.26004	-0.730425	-1.05625	-0.658358	-2.64886	0.0879769	0.409292	0.118703	0.803364	0.389988	0.631499	0.34222	2.33402	0	0	0	0	0	0	0	1
5460	171.028	7.42917	Positive	NA	Unknown	18.0814	20.3507	17.8521	18.4684	18.1627	17.2008	18.0526	19.3655	17.3792	19.9121	18.9023	18.5057	17.4241	17.3653	16.7605	10.477	0.702227	0.438554	-1.05027	-0.0372812	0.73866	-0.164548	1.2921	8.88856	0.258208	0.148922	0.425822	0.0111167	0.274504	0.0511881	0.557945	7.94671	0	0	0	0	0	0	0	1
5462	212.043	1.4848	Positive	NA	Unknown	14.0069	17.1925	19.5495	18.6972	18.4182	18.0485	14.5712	12.015	18.2938	19.2225	18.936	20.7256	19.6614	18.6551	14.3282	13.4542	-4.28687	-2.03	0.613479	-2.02836	-1.24323	-0.606575	0.24306	-1.43921	3.11439	1.05612	0.223025	1.05491	0.539083	0.220056	0.0786329	0.655543	1	0	0	0	0	0	0	0
5466	466.263	10.2339	Positive	NA	Unknown	21.395	21.8815	22.2484	21.9165	21.588	21.7832	18.6056	2.66454e-14	18.5969	19.4813	20.0215	20.1975	20.0996	19.1023	12.3483	-2.84217e-14	2.79809	2.40015	2.22691	1.71896	1.48839	2.68093	6.25729	5.50671e-14	2.58588	2.06863	1.85444	1.27374	1.03697	2.4303	7.57896	0	1	1	0	0	0	1	1	0
5467	266.073	1.54174	Positive	NA	Unknown	15.3945	19.0786	17.5127	16.3967	17.6889	18.5394	19.0361	15.6812	20.7384	20.045	16.5862	19.2778	18.7013	17.2332	15.1096	16.1293	-5.34391	-0.966427	0.92652	-2.88105	-1.01245	1.30623	3.92643	-0.448064	3.06674	0.291806	0.277178	1.25162	0.308957	0.425538	1.96157	0.119303	1	0	0	0	0	0	0	0
5471	270.153	3.3413	Positive	NA	Unknown	19.0788	19.6642	19.669	18.3793	18.6594	19.0709	21.3461	17.841	17.9177	17.3297	16.1861	16.5611	19.9101	17.9357	19.948	7.97794	1.16108	2.33443	3.4829	1.81818	-1.25068	1.13515	1.39817	9.8631	0.284637	0.700249	1.22644	0.501527	0.311805	0.276914	0.358188	5.37958	0	0	0	0	0	0	0	1
5474	339.121	9.31979	Positive	NA	Unknown	16.9024	18.7693	19.9888	19.9981	19.5993	19.6556	19.2436	16.0411	16.6224	18.0003	19.4839	19.4798	19.0864	17.2558	16.8212	3.42596	0.279942	0.768984	0.504982	0.518272	0.512829	2.3998	2.42234	12.6152	0.0789326	0.247752	0.151632	0.156189	0.154319	1.10149	1.11625	10.1416	0	0	0	0	0	0	0	1
5478	143.533	7.07215	Positive	NA	Unknown	16.4667	17.5398	18.7394	18.5665	17.0119	15.0749	15.9501	17.6972	17.6438	19.3657	19.3917	18.7102	18.6164	16.3861	12.7002	13.2122	-1.17705	-1.8259	-0.652292	-0.143682	-1.60447	-1.31124	3.24983	4.48497	0.943746	1.77344	0.426701	0.0736818	1.46948	1.09944	4.05913	6.20825	0	0	0	0	0	0	1	1
5481	263.125	9.28184	Positive	NA	Unknown	17.4615	18.3329	18.9848	17.9518	17.2867	16.8584	15.5456	19.4036	18.1545	19.1604	20.0219	19.2652	18.4746	15.751	14.9265	14.7977	-0.692916	-0.827494	-1.03714	-1.31334	-1.18792	1.10738	0.619135	4.60586	0.635764	0.810138	1.11264	1.56337	1.35182	1.22192	0.547045	8.53532	0	0	0	0	0	0	0	1
5483	374.288	10.1934	Positive	NA	Unknown	4.4	3.53873	7.12564	7.78199	7.42098	7.6221	17.5433	16.1181	18.9662	19.1947	18.3744	13.6812	8.53563	7.12402	14.7579	3.4383	-14.5662	-15.656	-11.2488	-5.89918	-1.11464	0.498079	2.78539	12.6798	2.91465	3.23155	2.00298	0.795187	0.103667	0.0437596	0.299163	2.38484	1	1	1	0	0	0	0	1
5484	155.046	3.34461	Positive	NA	Unknown	19.1789	19.6934	19.7748	18.849	18.9922	19.244	21.3418	18.2827	18.3515	18.4039	17.4255	17.3324	19.9079	18.2798	19.7381	12.3544	0.827376	1.28946	2.34934	1.5166	-0.915676	0.964218	1.60366	5.92826	0.381064	0.681706	1.59106	0.852035	0.43365	0.463546	0.921096	5.84678	0	0	0	0	0	0	0	1
5485	200.127	4.56789	Positive	NA	Unknown	19.2339	20.3758	20.2943	19.1214	18.7197	20.3246	21.5747	19.0963	20.0075	21.2603	21.8747	20.329	19.5265	18.6438	18.9955	12.3319	-0.773605	-0.884549	-1.58043	-1.20755	-0.806802	1.68076	2.57919	6.76438	0.604779	0.725036	1.65163	1.12022	0.6399	1.8066	3.35745	10.9389	0	0	0	0	0	0	1	1
5486	138.043	6.11849	Positive	NA	Unknown	10.2942	17.0316	13.7616	14.3422	14.1681	12.9025	11.7877	7.00093	19.7744	18.7662	18.2465	17.8846	17.2598	13.2276	9.02611	10.2947	-9.48022	-1.73463	-4.48488	-3.54243	-3.09172	-0.325085	2.76157	-3.29377	3.19792	0.306874	1.08281	0.778149	0.646337	0.0469749	0.555726	0.704282	1	0	0	0	0	0	0	0
5489	183.026	2.87729	Positive	NA	Unknown	16.6408	16.6508	17.4925	20.1035	20.6084	20.3816	19.979	20.5645	16.9392	15.5635	14.7197	20.0346	20.3266	20.6548	20.7299	21.0067	-0.29846	1.08724	2.77276	0.068835	0.281782	-0.27325	-0.750922	-0.442116	0.163223	0.829882	3.19045	0.0334833	0.152842	0.14759	0.503751	0.258988	0	0	1	0	0	0	0	0
5491	228.017	9.29242	Positive	NA	Unknown	19.4784	18.9533	18.3008	17.4091	15.0359	13.7792	-1.4803e-15	4.05601e-14	20.4734	19.4803	18.7435	18.6595	16.4319	3.15544e-30	-2.96059e-15	1.18424e-14	-0.994945	-0.526979	-0.442671	-1.25038	-1.39602	13.7792	1.4803e-15	2.87178e-14	1.48187	0.608202	0.483069	2.06705	2.42684	24.6587	0	0	0	0	0	1	1	1	0	0
5492	112.01	1.5033	Positive	NA	Unknown	21.1742	20.7514	20.6803	19.6954	19.2611	18.9446	15.5653	15.3999	19.4119	19.5686	17.8578	18.6235	18.1754	16.6814	14.5612	14.3412	1.76225	1.18275	2.82249	1.07193	1.08571	2.2632	1.00414	1.05879	2.12069	1.18913	4.1558	1.03366	1.05255	3.04671	0.942676	1.01577	1	0	1	0	0	1	0	0
5494	132.522	1.50474	Positive	NA	Unknown	21.7209	21.369	21.2788	20.3048	19.9039	19.4337	16.6015	17.035	20.2474	20.3892	19.3601	19.5272	19.3473	18.3605	16.7826	16.2352	1.47345	0.979861	1.91866	0.77765	0.556556	1.07318	-0.181168	0.799808	1.49487	0.836522	2.1961	0.610219	0.394379	0.949891	0.105382	0.633692	0	0	1	0	0	0	0	0
5499	259.131	7.65109	Positive	NA	Unknown	3.66625	1.77636e-15	4.02765	13.3176	12.6057	5.32907e-15	15.5944	6.96585	16.0824	18.3584	17.4642	18.9638	17.9543	19.7413	19.4861	15.1935	-12.4162	-18.3584	-13.4366	-5.64625	-5.34852	-19.7413	-3.89173	-8.22769	4.49566	7.39073	4.99744	1.45357	1.34406	8.03933	0.855905	2.51478	1	1	1	0	0	1	0	1
5500	219.1	8.57111	Positive	NA	Unknown	17.6123	20.2849	19.6229	20.3347	20.2209	20.0523	19.2507	15.9063	18.5216	18.8004	19.1519	20.7591	20.4277	19.1048	17.3024	12.9101	-0.909302	1.48451	0.471037	-0.424432	-0.206835	0.947491	1.94838	2.9962	0.95124	1.92642	0.394319	0.345826	0.147252	1.00803	2.8597	5.1908	0	0	0	0	0	0	1	1
5504	232.996	2.98189	Positive	NA	Unknown	19.0215	20.6752	19.4018	20.0093	20.2432	19.3287	16.3848	18.5726	18.3752	19.2793	19.3557	20.2017	19.9349	19.1263	16.423	12.1602	0.646263	1.39585	0.046088	-0.19241	0.308361	0.202374	-0.0381339	6.4124	0.348282	0.969883	0.0192266	0.0858029	0.144696	0.0906483	0.0158496	7.94951	0	0	0	0	0	0	0	1
5505	232.117	6.43656	Positive	NA	Unknown	13.3834	12.5905	14.7776	14.7291	14.6355	15.028	16.8673	16.8319	16.7202	18.6273	19.3845	19.1425	19.4628	19.0507	18.5686	15.53	-3.33683	-6.03674	-4.60689	-4.4134	-4.8273	-4.02272	-1.70123	1.30194	3.27149	7.15995	5.0975	4.8154	5.4189	4.24796	1.2328	0.844598	1	1	1	1	1	1	0	0
5506	232.026	2.4937	Positive	NA	Unknown	16.4956	16.1712	15.0683	14.3121	15.7266	16.2126	13.5591	1.06581e-14	19.2364	20.0948	20.2348	17.4913	17.261	16.7954	17.3103	8.29536	-2.74079	-3.92361	-5.16655	-3.1792	-1.53438	-0.582833	-3.75121	-8.29536	0.997711	1.67105	2.49537	1.23246	0.454868	0.141769	1.56532	4.85138	0	0	1	0	0	0	0	1
5507	201.163	9.72161	Positive	NA	Unknown	21.3946	21.0642	20.8051	20.1273	19.2746	19.0003	17.8637	15.9664	19.7697	19.0442	19.3652	19.1079	17.6575	16.3033	13.9923	3.63871	1.62487	2.02005	1.43991	1.01947	1.61706	2.69707	3.87142	12.3277	0.591574	0.795146	0.504191	0.324752	0.587782	1.19453	2.01769	9.29778	0	0	0	0	0	0	1	1
5508	234.989	1.34265	Positive	NA	Unknown	19.4167	19.2369	19.5522	16.979	16.5469	16.111	13.8091	15.8338	19.9112	19.4584	19.1446	19.0451	17.0616	16.5713	14.2111	14.9365	-0.494472	-0.221582	0.407654	-2.06613	-0.514715	-0.460254	-0.401988	0.897227	0.297668	0.116964	0.235687	2.09254	0.312727	0.272735	0.231788	0.640344	0	0	0	1	0	0	0	0
5515	146.059	7.76587	Positive	NA	Unknown	19.2383	19.5342	19.6893	18.646	18.0858	18.4948	18.762	21.3476	19.1431	19.3182	19.9819	19.2106	18.2443	18.0954	18.7839	18.6573	0.0952047	0.215994	-0.2926	-0.564575	-0.15846	0.399369	-0.0219351	2.69029	0.126323	0.330811	0.486808	1.19938	0.227108	0.737907	0.026478	9.74512	0	0	0	0	0	0	0	1
5517	283.091	7.10554	Positive	NA	Unknown	16.7751	15.7967	14.2251	12.6513	7.35701	3.41089	-5.32907e-15	11.8525	19.2016	19.7726	18.7246	13.6112	11.7385	14.1338	13.7682	17.5639	-2.42648	-3.9759	-4.4995	-0.959857	-4.38152	-10.7229	-13.7682	-5.71131	0.665466	1.3297	1.59066	0.206895	1.53043	5.43149	7.40293	2.25193	0	0	0	0	0	1	1	1
5519	144.548	7.67143	Positive	NA	Unknown	19.313	21.7657	19.6005	22.0691	21.6944	20.6084	21.2952	4.11893e-14	16.023	18.2956	15.5441	21.0072	18.843	19.902	19.1248	7.9603e-14	3.28996	3.47008	4.05649	1.06195	2.85135	0.706384	2.17047	-3.84137e-14	1.84022	1.98904	2.49687	0.387257	1.49429	0.234697	1.01047	0	0	1	1	0	0	0	0	0
5520	136.507	2.65562	Positive	NA	Unknown	19.936	20.0376	20.5691	19.6777	19.4737	19.688	20.851	18.7929	19.0793	19.9509	20.3692	20.2669	19.9734	19.4479	18.5166	14.3198	0.856776	0.0866575	0.199858	-0.589157	-0.49964	0.240038	2.3344	4.47306	1.35598	0.0791275	0.201909	0.798133	0.637386	0.250935	5.60087	11.6226	0	0	0	0	0	0	1	1
5525	195.147	7.58718	Positive	NA	Unknown	22.8318	24.5484	20.59	23.6172	22.5691	22.4804	22.4179	10.5836	18.0394	20.0791	18.5287	21.3947	20.6497	21.0122	19.7287	11.9324	4.79247	4.46935	2.06123	2.22248	1.91939	1.46821	2.68915	-1.34876	3.61933	3.2794	1.07093	1.19239	0.968208	0.668524	1.57009	0.596376	1	1	0	0	0	0	0	0
5528	149.515	2.26189	Positive	NA	Unknown	19.685	19.392	19.5121	19.2718	19.1051	18.4283	17.0998	18.0758	19.7565	20.1991	19.9623	19.8859	19.6488	18.4682	15.4493	17.1409	-0.07151	-0.807159	-0.45025	-0.614141	-0.5437	-0.0399073	1.6505	0.934939	0.0524481	0.945418	0.431003	0.648694	0.551179	0.0285577	2.65629	1.16442	0	0	0	0	0	0	1	0
5532	256.116	6.87024	Positive	NA	Unknown	15.0159	18.4997	17.2418	20.6687	20.7959	18.9221	15.4378	16.7577	10.9916	14.6148	16.8704	21.6287	21.1899	18.4737	19.667	15.3172	4.02431	3.88488	0.371366	-0.960013	-0.394014	0.448366	-4.22921	1.44054	2.46614	2.34293	0.112202	0.34088	0.119831	0.138514	2.6502	0.574986	1	1	0	0	0	0	1	0
5535	105.055	1.72906	Positive	NA	Unknown	19.035	18.7662	18.1903	18.3547	18.9601	18.8323	18.9135	17.7473	19.4232	20.1598	18.2485	18.9699	18.9238	19.1792	17.9577	19.737	-0.388185	-1.39356	-0.0581872	-0.615167	0.0363512	-0.346887	0.95578	-1.98971	0.333579	1.91834	0.0399037	0.604259	0.0245287	0.290377	1.11181	3.21296	0	0	0	0	0	0	0	1
5538	159.116	9.02371	Positive	NA	Unknown	20.9805	21.2926	20.8231	20.6291	19.6692	19.2348	18.0923	14.9096	19.9625	18.3579	17.8566	18.3524	16.9844	14.5144	14.0727	11.8888	1.01797	2.9347	2.96653	2.27673	2.68479	4.72042	4.01964	3.0208	0.631715	2.85715	2.90183	1.97604	2.51225	5.49943	4.44352	2.97837	0	1	1	0	1	1	1	1
5539	191.069	9.02914	Positive	NA	Unknown	14.9479	17.561	16.3842	18.5243	19.8361	19.0913	18.0817	17.6027	19.3262	19.9775	19.6382	18.9179	17.9314	17.4987	15.8864	15.1267	-4.37832	-2.4165	-3.25405	-0.393606	1.90474	1.5926	2.19532	2.47602	5.38948	2.35113	3.60314	0.206484	1.66192	1.28241	2.04421	2.43578	1	1	1	0	0	0	1	1
5540	248.111	8.08413	Positive	NA	Unknown	17.7933	19.4697	19.7082	18.5625	16.9324	15.0662	12.5204	12.8403	16.9666	18.5219	19.418	19.2171	16.7335	15.5517	15.3584	13.8942	0.826709	0.947897	0.290213	-0.654596	0.198896	-0.485475	-2.838	-1.05386	0.463284	0.554241	0.131799	0.34427	0.0868407	0.239011	2.61948	0.638554	0	0	0	0	0	0	1	0
5541	287.053	9.22266	Positive	NA	Unknown	21.1217	21.3739	20.5458	20.0597	20.1643	21.5811	18.8703	16.8599	20.452	18.7909	19.0848	17.7897	16.3469	12.9277	13.4407	7.17779	0.669708	2.58296	1.46109	2.27002	3.81742	8.65336	5.42958	9.68213	0.188171	1.06891	0.491133	0.891081	1.87924	5.89929	3.13173	6.78222	0	0	0	0	0	1	1	1
5542	218.101	1.70985	Positive	NA	Unknown	12.8345	13.6389	13.5066	15.9441	18.8511	19.8748	18.31	13.1661	16.0227	17.4298	17.256	20.2745	19.7153	20.2173	18.3267	15.4499	-3.18821	-3.79083	-3.74942	-4.33044	-0.864264	-0.342444	-0.0167426	-2.28381	2.77298	3.54992	3.4954	4.27056	0.44421	0.14565	0.00623534	1.70664	1	1	1	1	0	0	0	0
5543	215.138	6.63203	Positive	NA	Unknown	13.863	15.6945	14.1159	17.4651	18.0779	17.6948	17.4263	16.1458	18.1933	17.0396	18.1109	19.9327	19.89	19.3806	20.903	15.5172	-4.33032	-1.34504	-3.99496	-2.46758	-1.81211	-1.68582	-3.4767	0.62862	4.24276	0.79684	3.79533	1.89735	1.21274	1.09385	3.11891	0.295978	1	0	1	0	0	0	1	0
5544	132.113	1.314	Positive	NA	Unknown	17.349	19.7969	19.9866	18.9519	19.6841	19.4024	20.5495	18.5263	17.6331	19.7196	16.4631	18.1037	15.8596	15.6324	19.8547	20.3133	-0.284062	0.0772508	3.52352	0.848199	3.82448	3.77007	0.694784	-1.78703	0.0756993	0.0194456	1.77575	0.26143	2.00127	1.95987	0.206146	0.678408	0	0	0	0	1	0	0	0
5545	316.085	5.93472	Positive	NA	Unknown	17.4733	19.4489	17.9719	19.2204	19.7472	17.5497	15.7157	12.5857	13.0027	18.5807	17.2339	19.8897	20.099	18.1833	11.2767	4.18633	4.47062	0.868163	0.738035	-0.669288	-0.351809	-0.633677	4.43898	8.39939	0.844992	0.112152	0.0938018	0.0843299	0.0425615	0.0794835	0.836696	2.08963	0	0	0	0	0	0	0	1
5550	197.02	1.88956	Positive	NA	Unknown	20.1488	20.4918	20.8602	21.8183	22.0129	22.5402	20.805	14.3845	17.7565	17.7632	18.6903	20.0454	20.0416	18.8037	17.7785	14.2711	2.39235	2.72863	2.16988	1.7729	1.97128	3.73648	3.0265	0.113309	3.26612	3.9293	2.84026	2.11843	2.47208	5.96896	4.52882	0.0671793	1	1	1	1	1	1	1	0
5551	153.025	6.87833	Positive	NA	Unknown	17.5344	20.1563	20.1205	21.6844	22.066	21.6705	21.84	21.2314	12.7578	12.1927	13.8303	17.5968	18.5629	14.4172	15.2752	12.8529	4.77665	7.96356	6.29021	4.08756	3.50314	7.25327	6.56487	8.37856	2.82467	5.70052	4.16565	2.25359	1.79949	5.04796	4.41622	6.08015	1	1	1	1	0	1	1	1
5552	107.505	1.79742	Positive	NA	Unknown	17.8306	19.9429	19.5653	20.2252	20.7834	19.8173	16.7042	14.7171	14.8008	17.7003	18.849	20.3278	20.2725	20.1797	18.2248	20.17	3.02976	2.24267	0.716324	-0.102549	0.51089	-0.362429	-1.52061	-5.45297	2.48201	1.60124	0.338961	0.03855	0.224784	0.150887	0.918106	5.60715	1	0	0	0	0	0	0	1
5554	179.08	6.58747	Positive	NA	Unknown	14.5221	13.0821	13.559	17.8089	17.6956	14.07	14.1836	14.6354	12.8555	14.6524	15.4446	19.8105	18.3207	16.6428	21.0088	16.2499	1.66654	-1.57029	-1.88559	-2.00156	-0.62506	-2.57284	-6.82519	-1.6145	0.801045	0.738081	0.951545	1.03516	0.228023	1.48414	5.86243	0.766754	0	0	0	0	0	0	1	0
5555	259.009	1.43284	Positive	NA	Unknown	17.646	19.8724	17.6967	18.5719	19.5928	19.399	19.7897	14.5593	16.7988	18.7198	13.903	19.0912	18.1864	19.3384	19.1717	15.3236	0.847194	1.15265	3.7936	-0.519313	1.4064	0.0606659	0.617959	-0.764303	0.317586	0.469034	2.49846	0.17704	0.609807	0.0178988	0.216936	0.279906	0	0	1	0	0	0	0	0
5557	788.475	12.3206	Positive	NA	Unknown	7.8269	12.951	7.09622	10.9925	-3.55271e-15	19.6684	18.436	10.908	0	13.3887	14.8555	8.53637	20.5541	19.3096	19.1435	4.13823	7.8269	-0.437733	-7.75929	2.45616	-20.5541	0.35884	-0.707499	6.76973	1.40724	0.0433465	1.3897	0.297077	5.52085	0.0352376	0.0720746	1.14228	0	0	0	0	1	0	0	0
5562	88.1123	5.02627	Positive	NA	Unknown	22.5972	21.6596	21.3671	20.5942	21.0921	20.4269	18.4439	14.9294	21.7072	20.3979	20.3818	18.4156	19.2869	17.8722	16.9751	13.4488	0.890044	1.26166	0.985363	2.17851	1.80521	2.55478	1.46887	1.48061	0.536405	0.861121	0.614166	1.8845	1.43366	2.37716	1.06648	1.07861	0	0	0	0	0	1	0	0
5567	383.129	7.40759	Positive	NA	Unknown	18.1351	15.8541	16.8708	17.0505	15.2418	14.7903	14.0481	10.3829	20.6593	19.3739	18.158	15.9904	15.0558	13.6544	12.4771	10.6627	-2.52427	-3.51988	-1.28721	1.06017	0.186014	1.13591	1.57098	-0.279781	2.18378	3.52388	0.830313	0.636797	0.0800622	0.699185	1.09872	0.125367	1	1	0	0	0	0	0	0
5573	261.073	8.07218	Positive	NA	Unknown	18.3896	20.11	20.672	22.2693	21.5467	19.819	19.3445	18.7638	16.456	13.027	16.3705	20.3655	18.9079	16.4981	15.0344	13.604	1.9336	7.083	4.30145	1.90381	2.63876	3.32089	4.31011	5.15974	0.900638	5.66176	2.85357	0.88131	1.40252	1.9596	2.86183	3.69581	0	1	1	0	0	0	1	1
5576	700.423	12.3734	Positive	NA	Unknown	7.75694	13.0105	7.96046	11.1358	3.71391	20.0141	18.9749	11.1851	5.32907e-15	15.1878	15.5037	12.6432	20.6256	19.2033	19.1498	4.39317	7.75694	-2.17729	-7.5432	-1.50738	-16.9117	0.810805	-0.174836	6.7919	1.368	0.253354	1.31395	0.164533	4.19631	0.0825372	0.0166531	1.13042	0	0	0	0	1	0	0	0
5577	91.0543	8.64557	Positive	NA	Unknown	18.6641	19.7012	20.28	19.7658	19.113	18.9957	17.0211	13.8492	18.3784	18.8425	19.8531	19.3174	18.4861	17.6907	15.5625	13.1678	0.285739	0.858627	0.426852	0.448428	0.626939	1.305	1.45859	0.681332	0.295713	1.28595	0.491211	0.524007	0.824186	2.36342	2.77691	0.925565	0	0	0	0	0	1	1	0
5578	295.077	3.39353	Positive	NA	Unknown	22.2201	22.1012	23.2887	23.1822	22.1891	22.1572	20.8234	13.6331	20.3713	19.9349	19.9779	18.7642	19.0461	18.2893	17.6973	13.0001	1.84883	2.1663	3.31083	4.418	3.14301	3.86785	3.12602	0.633078	1.843	2.32207	4.24463	6.19943	3.95104	5.22867	3.92144	0.418049	0	1	1	1	1	1	1	0
5580	294.153	2.44774	Positive	NA	Unknown	13.3868	16.5474	14.8743	18.2165	19.4216	19.369	18.8392	18.5496	14.5258	16.6692	18.3481	19.835	19.5008	19.6985	19.2277	19.3266	-1.13906	-0.121821	-3.47382	-1.61844	-0.0792301	-0.329475	-0.38844	-0.777076	0.437237	0.0350864	2.06609	0.69608	0.0225168	0.101131	0.121349	0.271237	0	0	1	0	0	0	0	0
5587	203.002	1.13485	Positive	NA	Unknown	16.0363	16.961	17.4083	15.9115	17.2051	18.1529	18.1445	18.5877	19.1465	19.0369	17.9018	15.7344	18.5887	17.459	18.8892	18.2457	-3.11012	-2.07589	-0.493567	0.177067	-1.38358	0.693859	-0.744766	0.342014	2.62877	1.45955	0.21925	0.0695816	0.820143	0.331286	0.361928	0.143452	1	0	0	0	0	0	0	0
5590	318.189	11.8379	Positive	NA	Unknown	17.7858	19.3963	18.9265	17.7206	18.4016	18.1626	19.2918	18.3651	18.2493	18.4051	18.0162	18.5085	18.4616	16.6326	17.632	17.2456	-0.463522	0.991215	0.910294	-0.78787	-0.0600025	1.52998	1.65978	1.11952	0.362603	1.00068	0.887867	0.727165	0.0367175	1.87068	2.10667	1.18983	0	0	0	0	0	0	1	0
5593	215.142	9.5273	Positive	NA	Unknown	19.8446	20.0113	19.3156	17.7329	15.2373	13.7667	13.5343	13.0023	20.2954	20.3187	19.565	17.2784	15.3101	11.5062	6.94307	10.3664	-0.450739	-0.307428	-0.249429	0.454479	-0.0728066	2.26055	6.59119	2.63593	0.123931	0.0813923	0.0650175	0.125081	0.0180836	0.923086	4.28114	1.1473	0	0	0	0	0	0	1	0
5594	327.212	8.43283	Positive	NA	Unknown	14.7314	17.3685	19.5257	18.8702	16.0353	15.0314	18.9148	17.4088	17.4974	20.7146	20.2191	18.9059	17.0181	15.3029	16.8997	12.7681	-2.76597	-3.34615	-0.693391	-0.0357276	-0.982824	-0.271498	2.0151	4.64069	3.16549	4.13492	0.452335	0.0170226	0.719147	0.14601	2.00115	6.3517	1	1	0	0	0	0	1	1
5595	280.116	8.87252	Positive	NA	Unknown	19.0943	18.8843	18.1165	18.16	17.9238	15.4445	15.6439	16.6915	19.8211	19.5851	19.2161	16.8234	16.4785	15.3922	12.6293	10.6298	-0.726822	-0.700769	-1.09956	1.33659	1.4453	0.05234	3.01455	6.06166	0.389189	0.371637	0.669721	0.875975	0.977481	0.0212516	2.82852	7.19457	0	0	0	0	0	0	1	1
5598	123.518	2.27082	Positive	NA	Unknown	22.893	22.989	22.7075	21.9277	21.5435	20.5295	19.0399	19.6584	20.3497	20.2507	19.3758	20.5134	19.96	19.6732	20.0972	20.3155	2.54329	2.73821	3.33163	1.41435	1.58355	0.8563	-1.05727	-0.657123	4.8543	5.35052	6.84734	2.11743	2.49592	1.02532	1.38649	0.709553	1	1	1	1	1	0	0	0
5599	216.086	7.17948	Positive	NA	Unknown	15.0592	15.9727	14.6193	16.3224	15.5073	14.2459	14.5985	18.0731	15.4537	14.6458	15.8188	20.1363	19.3888	17.4086	16.3663	16.7517	-0.394496	1.32687	-1.19947	-3.81381	-3.88147	-3.16264	-1.76773	1.3214	0.109198	0.461683	0.405524	2.01517	2.06753	1.53409	0.675355	0.459221	0	0	0	1	1	0	0	0
5605	219.173	8.71886	Positive	NA	Unknown	19.4836	19.2908	19.0422	18.1594	17.7878	18.5657	18.9197	18.8241	19.2455	18.8994	18.4242	17.4838	17.262	17.0742	14.065	14.6701	0.238128	0.391444	0.618012	0.675619	0.525802	1.49155	4.85475	4.15399	0.123568	0.218615	0.381992	0.42792	0.312179	1.26115	6.57464	5.39888	0	0	0	0	0	0	1	1
5608	323.074	9.05721	Positive	NA	Unknown	20.5881	19.1595	17.1258	14.7239	15.3185	14.6167	14.492	13.7352	18.7944	18.8424	14.2294	10.836	12.2745	6.93418	-7.77156e-16	4.996e-15	1.79373	0.317103	2.89646	3.88791	3.04407	7.68249	14.492	13.7352	0.4813	0.0643296	0.920324	1.4003	0.986947	3.74471	8.39369	7.89877	0	0	0	0	0	1	1	1
5610	174.534	6.12677	Positive	NA	Unknown	10.8698	16.5849	13.065	14.6757	13.201	12.5785	11.1813	3.31811	19.6483	18.2127	17.468	17.7398	17.176	13.9795	7.96133	7.11952	-8.77843	-1.62777	-4.40294	-3.06413	-3.975	-1.401	3.21993	-3.80141	2.66589	0.267221	0.98312	0.597301	0.851943	0.223269	0.63842	0.800797	1	0	0	0	0	0	0	0
5612	176.055	1.81345	Positive	NA	Unknown	20.7698	20.7509	21.1461	20.3143	19.709	19.7221	17.5125	13.7093	19.2631	19.3133	19.4187	20.0054	18.8774	17.912	17.1738	14.9604	1.50666	1.43762	1.72737	0.308881	0.831609	1.8101	0.338737	-1.25104	1.98176	1.85068	2.41854	0.235979	0.845008	2.58842	0.263625	1.51163	1	0	1	0	0	1	0	0
5619	166.071	2.48991	Positive	NA	Unknown	20.1576	20.0919	19.6789	18.0627	19.4066	19.4347	19.6646	19.9033	18.3108	18.635	18.3726	19.2924	19.3164	18.1015	16.7348	18.209	1.84681	1.45695	1.30636	-1.22971	0.090203	1.33324	2.92979	1.69433	1.27695	0.911777	0.783508	0.721099	0.0350895	0.805859	2.49746	1.12865	0	0	0	0	0	0	1	0
5620	252.053	8.29949	Positive	NA	Unknown	16.0532	16.4557	18.4216	17.7036	15.4098	12.1808	12.8436	13.6031	17.3246	19.1458	19.099	18.3236	17.7364	14.2556	8.37045	10.7507	-1.27134	-2.6901	-0.677377	-0.620011	-2.32659	-2.07473	4.47319	2.85239	0.371351	1.01259	0.174024	0.157214	0.826296	0.705856	2.11092	1.10033	0	0	0	0	0	0	1	0
5624	153.541	7.30244	Positive	NA	Unknown	12.496	14.2214	16.3006	17.5107	16.5947	14.9365	15.1451	16.2706	16.7737	18.8067	19.0515	18.7108	18.5222	17.4346	14.7115	14.2932	-4.27766	-4.58532	-2.75095	-1.20018	-1.92749	-2.49807	0.433609	1.97734	5.39862	5.90221	2.93865	0.888791	1.75251	2.55684	0.238408	1.81899	1	1	1	0	0	1	0	0
5625	138.042	1.96793	Positive	NA	Unknown	10.8604	17.2933	13.4068	14.6203	15.1334	16.4816	17.3879	15.6641	20.0195	18.3975	15.1442	17.6833	16.8308	15.4886	15.3222	15.2296	-9.15909	-1.10416	-1.73743	-3.06299	-1.69733	0.993008	2.06564	0.434439	5.01751	0.274658	0.485742	1.05201	0.471205	0.241688	0.610596	0.0942363	1	0	0	0	0	0	0	0
5627	247.041	1.02415	Positive	NA	Unknown	20.7843	21.8906	20.8573	20.8984	20.0667	18.7707	17.4741	13.343	19.6885	19.3876	19.8779	19.9571	19.6083	15.972	15.7678	12.3873	1.09577	2.50306	0.979452	0.941324	0.458487	2.79866	1.7063	0.955688	0.752842	2.45917	0.646189	0.612578	0.246221	2.88986	1.40785	0.625161	0	1	0	0	0	1	0	0
5628	264.143	2.63727	Positive	NA	Unknown	8.35402	11.6995	11.187	14.5592	18.7839	19.4125	19.0854	18.8063	8.31083	19.3816	18.85	17.0137	19.7751	20.2289	19.3505	20.0579	0.0431919	-7.68202	-7.66294	-2.4545	-0.991193	-0.816433	-0.265076	-1.25163	0.00639235	2.60369	2.59433	0.519856	0.170877	0.136997	0.04071	0.224428	0	1	1	0	0	0	0	0
5630	140.001	1.653	Positive	NA	Unknown	16.2945	19.0542	19.0155	20.3031	20.0741	19.8883	18.5315	14.2019	16.0575	16.6743	19.4848	21.0046	19.8243	19.5006	17.6309	14.1146	0.236989	2.37989	-0.469214	-0.701429	0.249797	0.387734	0.900643	0.0872868	0.105299	2.03018	0.229736	0.375878	0.111606	0.183625	0.518667	0.0363037	0	1	0	0	0	0	0	0
5634	385.071	8.85646	Positive	NA	Unknown	12.1115	18.6894	16.9045	16.9098	15.667	13.3455	11.5484	12.9508	12.3075	19.669	19.4376	19.1269	17.4054	15.744	15.07	9.76996e-15	-0.196052	-0.979649	-2.53313	-2.21703	-1.73836	-2.39856	-3.52165	12.9508	0.0221825	0.121951	0.374591	0.317157	0.236069	0.349762	0.57409	3.64896	0	0	0	0	0	0	0	1
5653	228.121	6.70848	Positive	NA	Unknown	13.9774	14.8671	15.8417	18.4182	17.1327	16.5304	15.3881	15.6067	13.7796	16.862	18.9511	19.4128	19.3382	19.6841	18.0479	16.1934	0.197822	-1.9949	-3.10938	-0.994693	-2.20549	-3.15371	-2.65984	-0.586671	0.0775257	1.35758	2.58906	0.518032	1.57005	2.64267	2.06289	0.266307	0	0	1	0	0	1	1	0
5654	207.538	7.05278	Positive	NA	Unknown	13.6307	14.4297	16.1492	16.3491	15.3515	15.4001	13.0732	3.60739	17.5804	18.2935	18.607	18.5695	17.4681	15.8931	13.2679	3.65263e-14	-3.94973	-3.8638	-2.45779	-2.22035	-2.11658	-0.492905	-0.194659	3.60739	2.10674	2.04022	1.06072	0.919104	0.859666	0.139332	0.0507826	1.84573	1	1	0	0	0	0	0	0
5656	296.071	8.07531	Positive	NA	Unknown	16.4278	17.4571	19.0971	19.2447	19.2051	18.9009	18.1088	10.9892	15.6519	18.6966	19.7547	19.8143	19.033	17.0587	15.4644	-5.9508e-14	0.775868	-1.23948	-0.657602	-0.569667	0.172006	1.84217	2.64437	10.9892	0.775765	1.50793	0.619481	0.511998	0.121319	2.68435	4.46562	18.9237	0	0	0	0	0	1	1	1
5658	193.554	8.53973	Positive	NA	Unknown	18.796	18.5364	18.4774	16.054	11.5755	10.1803	10.3977	13.0733	19.3084	19.5769	18.9299	16.9348	12.0255	12.0938	3.78857	3.60346	-0.512341	-1.04054	-0.452446	-0.880795	-0.450011	-1.91352	6.60916	9.46985	0.103398	0.232188	0.0902359	0.190806	0.0897068	0.49611	2.8512	4.713	0	0	0	0	0	0	1	1
5660	175.111	9.09219	Positive	NA	Unknown	16.3746	16.5559	15.0405	15.5838	15.1071	16.5156	17.6661	17.72	19.7731	18.6111	17.3361	17.4747	15.4411	15.0098	12.9457	13.4906	-3.39855	-2.05525	-2.29562	-1.89085	-0.334054	1.50579	4.72041	4.22942	4.26915	2.08298	2.44699	1.84443	0.186905	1.32515	6.54899	5.7059	1	1	1	0	0	0	1	1
5663	357.131	9.34132	Positive	NA	Unknown	16.3514	18.3375	19.5586	19.6078	19.2364	19.1408	18.5112	15.3354	15.9849	17.5617	19.0186	19.0706	18.7167	15.9725	15.8242	3.52665	0.36643	0.775823	0.540003	0.537133	0.519686	3.16837	2.68697	11.8088	0.097794	0.229683	0.150737	0.149826	0.144315	1.48033	1.16747	8.75754	0	0	0	0	0	0	0	1
5666	465.101	9.027	Positive	NA	Unknown	21.804	21.4056	21.1709	19.7318	19.1412	18.9786	19.3734	12.9332	19.3923	18.1774	19.1476	17.3038	17.3395	15.9657	15.2632	13.1814	2.41164	3.2282	2.02327	2.42799	1.80171	3.0129	4.11019	-0.248154	2.06149	3.14415	1.59595	2.08191	1.34906	2.84791	4.4058	0.110455	1	1	0	1	0	1	1	0
5667	314.143	6.1365	Positive	NA	Unknown	16.638	15.4985	15.1298	15.8791	13.5292	15.588	16.2319	13.0005	19.8484	18.7232	18.758	17.7622	17.7497	14.9577	14.4983	12.985	-3.21034	-3.22463	-3.62819	-1.88315	-4.22053	0.630333	1.73361	0.0154369	2.83889	2.85711	3.38128	1.30795	4.17608	0.302162	1.1615	0.00580041	1	1	1	0	1	0	0	0
5668	176.127	1.7754	Positive	NA	Unknown	13.5142	16.4444	17.2765	16.0725	17.4962	17.5107	16.8213	16.2994	18.2408	19.4896	18.3806	20.4495	19.4583	17.768	17.2103	16.68	-4.72662	-3.04519	-1.10408	-4.37702	-1.9621	-0.257279	-0.389001	-0.380547	4.40404	2.36141	0.56208	3.96303	1.24678	0.0985058	0.156383	0.152513	1	1	0	1	0	0	0	0
5669	219.173	9.28381	Positive	NA	Unknown	21.0987	21.1398	21.149	19.3936	18.7389	18.9065	19.7198	19.0901	19.8611	18.8123	19.6789	19.4913	18.2019	16.5729	15.0819	15.6512	1.23759	2.32754	1.47009	-0.0977034	0.537014	2.3336	4.63783	3.43889	1.73259	4.2833	2.22709	0.0726799	0.538247	4.29855	9.88746	7.07911	0	1	1	0	0	1	1	1
5675	247.132	8.1178	Positive	NA	Unknown	18.0903	18.5772	18.6708	17.1285	15.6698	13.251	13.7625	15.6285	17.9269	19.0675	19.0476	18.0323	16.6111	13.4091	3.4276	10.6658	0.163441	-0.490344	-0.376814	-0.903867	-0.941237	-0.158164	10.3349	4.96263	0.0419973	0.137544	0.102585	0.281267	0.295538	0.0405824	7.66717	2.90728	0	0	0	0	0	0	1	1
5679	222.132	2.23036	Positive	NA	Unknown	12.3997	15.6902	13.5464	16.4326	17.4469	15.3314	13.4488	11.0792	13.0723	17.1368	19.8388	21.0524	20.0089	19.4565	18.7115	15.5157	-0.672564	-1.44661	-6.29244	-4.61976	-2.56206	-4.12505	-5.26263	-4.43648	0.22307	0.583545	4.67464	3.0396	1.29197	2.58185	3.65638	2.868	0	0	1	1	0	1	1	1
5681	304.137	7.09285	Positive	NA	Unknown	18.6641	18.3968	18.0807	17.3755	15.2794	15.3149	15.2233	13.7165	18.8702	18.878	18.92	17.9135	17.1434	16.8566	14.1911	13.8515	-0.206119	-0.481277	-0.839305	-0.537968	-1.86404	-1.54173	1.03219	-0.135002	0.116173	0.312367	0.639915	0.358788	1.98346	1.50434	0.849501	0.0731883	0	0	0	0	1	0	0	0
5682	356.117	1.48247	Positive	NA	Unknown	18.3059	19.8189	19.7384	19.9844	19.956	20.6145	18.2781	12.3145	19.1445	19.1234	18.3788	19.3984	19.2315	16.4198	14.2795	10.4399	-0.838591	0.695534	1.35955	0.586042	0.724505	4.19479	3.99864	1.87454	0.54057	0.423796	1.04858	0.341284	0.446627	5.21309	4.89354	1.66519	0	0	0	0	0	1	1	0
5688	133.097	1.63982	Positive	NA	Unknown	17.7577	19.1602	19.6964	18.1101	17.7299	17.4723	17.2042	17.1996	18.8217	19.2558	18.0603	17.1847	17.6924	16.602	16.2052	19.2818	-1.06398	-0.09562	1.63615	0.925344	0.0375386	0.870313	0.998964	-2.08216	0.925704	0.0524081	1.71624	0.762546	0.0198885	0.70117	0.847684	2.43874	0	0	0	0	0	0	0	1
5695	253.08	6.64941	Positive	NA	Unknown	22.3101	21.8483	21.4691	19.5594	15.9533	12.001	11.7506	3.81125	20.2207	19.0089	16.4563	13.1257	13.4561	16.1773	17.3196	11.7012	2.08942	2.83942	5.01281	6.43369	2.49725	-4.17624	-5.56895	-7.88994	0.636479	0.971473	2.20689	3.16519	0.811984	1.69099	2.5716	4.21263	0	0	1	1	0	0	1	1
5696	135.116	10.2893	Positive	NA	Unknown	15.9577	15.9576	15.6301	14.8699	14.1934	14.7564	14.3359	17.9533	19.6706	18.5423	18.171	16.5526	14.5065	14.8504	15.6311	16.8653	-3.71297	-2.58463	-2.54089	-1.68269	-0.313109	-0.0939999	-1.29517	1.08801	4.13085	2.46875	2.40829	1.32246	0.152429	0.0413903	0.911372	0.716146	1	1	1	0	0	0	0	0
5697	303.104	6.72674	Positive	NA	Unknown	16.942	18.5019	18.9472	18.3794	18.8065	20.9339	20.0817	16.9297	15.748	17.0843	17.2569	17.6033	18.1025	19.1709	18.8158	14.3181	1.19394	1.41758	1.69032	0.776083	0.704024	1.76293	1.26588	2.61156	0.902589	1.15063	1.48247	0.503506	0.443632	1.57581	0.979877	2.79122	0	0	0	0	0	0	0	1
5698	137.533	7.3322	Positive	NA	Unknown	13.9283	14.8605	16.4259	16.4046	13.9556	13.2065	15.2391	16.0494	17.28	20.6673	19.3698	17.935	15.536	14.4552	14.0714	14.9069	-3.35174	-5.8068	-2.94394	-1.53044	-1.58037	-1.24868	1.16766	1.14253	1.83876	4.04697	1.52232	0.608121	0.634921	0.465056	0.426516	0.414801	0	1	0	0	0	0	0	0
5699	427.192	9.17298	Positive	NA	Unknown	20.8719	21.7695	21.4014	20.6607	19.587	19.1149	17.0448	12.0077	19.0951	19.115	18.979	18.371	17.6143	15.9887	12.6224	3.43881	1.7768	2.65454	2.42236	2.28968	1.97272	3.12621	4.42235	8.56885	0.671856	1.17636	1.03265	0.953741	0.775093	1.48904	2.46767	6.12715	0	0	0	0	0	0	1	1
5700	140.986	1.53185	Positive	NA	Unknown	20.0853	20.1245	20.2639	21.0897	21.0385	20.2655	18.0861	17.1766	17.8077	19.0768	19.0776	21.584	20.7576	20.5581	18.228	20.1106	2.27766	1.04773	1.18625	-0.494336	0.280914	-0.29256	-0.141883	-2.93402	1.69329	0.569514	0.672835	0.22213	0.116267	0.121647	0.0555194	2.44911	0	0	0	0	0	0	0	1
5703	233.152	9.57098	Positive	NA	Unknown	19.9126	20.4351	19.3417	18.4734	17.9072	16.9737	17.0013	18.3661	20.8545	20.2406	19.7077	18.2914	16.834	13.4027	14.4111	14.6813	-0.941956	0.194561	-0.366032	0.181927	1.07324	3.57106	2.59024	3.68477	1.06996	0.145059	0.305473	0.134465	1.28948	6.88156	4.55766	7.14533	0	0	0	0	0	1	1	1
5706	294.153	2.83241	Positive	NA	Unknown	13.175	15.5769	13.9142	17.6184	15.631	15.6952	15.8101	13.4487	14.7093	20.0774	19.5862	21.0475	18.4236	16.7292	16.4188	16.8487	-1.53428	-4.50056	-5.67198	-3.4291	-2.79262	-1.03403	-0.60873	-3.40001	0.405554	1.79175	2.50991	1.20855	0.903465	0.248992	0.134621	1.19388	0	0	1	0	0	0	0	0
5709	259.166	12.7143	Positive	NA	Unknown	21.2155	20.2569	22.8828	19.7965	19.2304	20.8602	17.551	14.4103	19.6569	15.5055	18.1204	18.4372	18.6793	17.1738	16.0763	14.1226	1.5586	4.75135	4.76232	1.35926	0.551106	3.68643	1.47469	0.287784	0.78636	3.88323	3.89569	0.652341	0.209323	2.7077	0.728788	0.100177	0	1	1	0	0	1	0	0
5710	288.983	2.21771	Positive	NA	Unknown	17.5099	18.5181	17.3864	17.5893	17.4634	16.4815	13.0643	14.7255	18.5943	19.0042	18.1278	18.4842	17.9779	16.0537	8.18045	14.0974	-1.08442	-0.486069	-0.741386	-0.894954	-0.514481	0.427758	4.88382	0.628168	0.269394	0.106852	0.171937	0.214137	0.113784	0.0928654	2.07148	0.142298	0	0	0	0	0	0	1	0
5712	233.152	9.20564	Positive	NA	Unknown	17.7371	18.3407	17.8723	17.5211	17.2991	17.5326	20.331	18.9315	20.294	19.4297	18.3885	19.2283	17.6418	15.7195	15.9853	15.2256	-2.55694	-1.089	-0.516121	-1.70716	-0.342708	1.81309	4.3457	3.70587	2.5492	0.750049	0.285329	1.41599	0.175561	1.54513	5.33175	4.30996	1	0	0	0	0	0	1	1
5714	374.288	10.9113	Positive	NA	Unknown	7.01575	10.576	13.0876	12.8713	16.7701	20.5505	23.603	21.0479	11.9966	17.8469	20.861	17.6387	16.1015	17.0116	18.5526	13.6165	-4.98084	-7.27091	-7.77332	-4.76736	0.668572	3.53897	5.05039	7.43135	2.02399	3.49273	3.83569	1.89867	0.14668	1.2325	2.06534	3.60172	1	1	1	0	0	0	1	1
5715	326.963	1.06642	Positive	NA	Unknown	18.253	19.5234	17.3209	19.2435	19.482	19.8383	18.5115	15.7032	18.6305	18.3983	16.8755	16.1167	17.9978	19.551	18.2086	15.3601	-0.377465	1.12508	0.445443	3.12676	1.48426	0.287275	0.302989	0.343085	0.169192	0.658032	0.205098	2.83094	0.964687	0.124156	0.13179	0.151676	0	0	0	1	0	0	0	0
5719	274.127	8.13333	Positive	NA	Unknown	19.1227	19.239	18.2616	15.4442	13.3467	12.728	11.4276	12.9045	19.586	19.9532	19.6667	17.6268	14.5344	13.7426	13.1441	11.1325	-0.463237	-0.714152	-1.40516	-2.18262	-1.18766	-1.01459	-1.71648	1.77204	0.285921	0.493758	1.25286	2.37591	0.986027	0.791443	1.67391	1.75343	0	0	0	1	0	0	0	0
5720	183.075	4.92089	Positive	NA	Unknown	15.3361	14.7376	13.9163	19.8917	21.2229	19.6701	17.8579	18.4359	12.2855	10.5737	16.0337	21.2456	20.3708	18.4155	19.5207	14.8609	3.05062	4.16388	-2.11741	-1.3539	0.852108	1.25455	-1.66279	3.57499	1.7081	2.68655	1.01	0.547405	0.303339	0.49521	0.721678	2.15268	0	1	0	0	0	0	0	1
5721	203.117	9.74604	Positive	NA	Unknown	13.5795	16.1734	12.6398	14.3644	13.7284	11.7109	11.5143	18.0736	20.0196	13.4365	15.1445	17.0549	16.1491	14.1904	14.0274	16.9741	-6.44007	2.73694	-2.5047	-2.69043	-2.4207	-2.47952	-2.51317	1.09948	3.83347	1.11628	0.984402	1.08936	0.938268	0.970481	0.989102	0.330222	1	0	0	0	0	0	0	0
5727	182.033	1.35947	Positive	NA	Unknown	16.4689	19.9588	19.6854	19.7159	19.9892	18.9143	16.3167	14.0818	19.5988	20.3671	20.1797	20.9146	19.8894	20.0453	17.2498	14.1719	-3.12998	-0.408365	-0.494304	-1.19877	0.0998606	-1.13098	-0.933082	-0.0901258	2.57284	0.171445	0.2142	0.654707	0.0371969	0.60539	0.469764	0.0334393	1	0	0	0	0	0	0	0
5728	152.127	4.49583	Positive	NA	Unknown	21.7594	23.2708	20.0827	21.6547	21.5266	20.6306	20.9481	16.2305	18.659	19.8979	16.7677	20.0405	17.2967	19.3422	18.5743	17.0992	3.10043	3.3729	3.31496	1.61423	4.22997	1.28847	2.3738	-0.868699	2.08922	2.36198	2.30317	0.819372	3.27299	0.602739	1.41634	0.361504	1	1	1	0	1	0	0	0
5729	744.449	12.3354	Positive	NA	Unknown	8.00337	12.6057	4.35887	12.0894	3.65114	19.9036	18.7687	14.7758	3.55271e-15	14.0243	15.5956	12.4929	20.6526	19.3496	19.2992	7.70274	8.00337	-1.41864	-11.2367	-0.403508	-17.0014	0.554088	-0.530468	7.07308	1.79195	0.183363	2.93384	0.0462844	5.20153	0.0647305	0.0617943	1.4971	0	0	1	0	1	0	0	0
[truncated: 4,613 more rows]

## Sheet: ESI MS Negative
Row ID	m/z	RT	ESI MS mode	Formula	Name	8 dpa BL (Lsmean Log2)	12 dpa BL (Lsmean Log2)	16 dpa BL (Lsmean Log2)	20 dpa BL (Lsmean Log2)	24 dpa BL (Lsmean Log2)	36 dpa BL (Lsmean Log2)	40 dpa BL (Lsmean Log2)	50 dpa BL (Lsmean Log2)	8 dpa WL (Lsmean Log2)	12 dpa WL (Lsmean Log2)	16 dpa WL (Lsmean Log2)	20 dpa WL (Lsmean Log2)	24 dpa WL (Lsmean Log2)	36 dpa WL (Lsmean Log2)	40 dpa WL (Lsmean Log2)	50 dpa WL (Lsmean Log2)	8 dpa BL/WL (Log2)	12 dpa BL/WL (Log2)	16 dpa BL/WL (Log2)	20 dpa BL/WL (Log2)	24 dpa BL/WL (Log2)	36 dpa BL/WL (Log2)	40 dpa BL/WL (Log2)	50 dpa BL/WL (Log2)	8 dpa -log10(p-value)	12 dpa -log10(p-value)	16 dpa -log10(p-value)	20 dpa -log10(p-value)	24 dpa -log10(p-value)	36 dpa -log10(p-value)	40 dpa -log10(p-value)	50 dpa -log10(p-value)	8 dpa Sig Index	12 dpa Sig Index	16 dpa Sig Index	20 dpa Sig Index	24 dpa Sig Index	36 dpa Sig Index	40 dpa Sig Index	50 dpa Sig Index
[truncated: 4,541 more rows]
