# Supplementary material for: Multi-omics analysis of pigmentation related to proanthocyanidin biosynthesis in brown cotton (Gossypium hirsutum L.)
Source: Front Plant Sci. 2024 Mar 13;15:1372232. doi: 10.3389/fpls.2024.1372232 (PMC10965557; doi:10.3389/fpls.2024.1372232)
Supplement: Supplementary Data Sheet 2 — A two-way ANOVA analysis of transcript data. [file DataSheet_2.xlsx]

## Sheet: Suppl Data 2
Gene	Chr.	Strain	Start	End	Arabidopsis ID	ArabDesc	Swissprot_id	SwissProt_desc	Trembl_id	Trembl_desc	KEGG_id	KEGG_desc	Pfam_ids	InterProt_ids	GO_ids	8B LSmean	8W LSmean	20B LSmean	20W LSmean	Log2 (B/W 8dpa)	Log2(B/W 20 dpa)	8-log10(p-value) B/W 8 dpa	20-log10(p-value) B/W 20 dpa	8 dpa Sig Index	20 dpa Sig Index
Gh_D11G1662	D11	-	17760659	17764027	AT5G38660	acclimation of photosynthesis to environment	Q55403	Y575_SYNY3 Thylakoid membrane protein slr0575 OS=Synechocystis sp. (strain PCC 6803 / Kazusa) GN=slr0575 PE=4 SV=1	B9SWM3	B9SWM3_RICCO Putative uncharacterized protein OS=Ricinus communis GN=RCOM_0015770 PE=4 SV=1			PF11016.3|DUF2854	IPR021275|Protein of unknown function DUF2854		1	2	13	27	-0.287679	-1.03724	0.17	3.23	0	-1
Gh_A02G1068	A02	+	52439947	52448060	AT1G76570	Chlorophyll A-B binding family protein	Q9LQN6	P2C04_ARATH Probable protein phosphatase 2C 4 OS=Arabidopsis thaliana GN=PLL5 PE=1 SV=1	M5WMP2	M5WMP2_PRUPE Uncharacterized protein OS=Prunus persica GN=PRUPE_ppa008546mg PE=4 SV=1	ath:AT3G27690	LHCB2:4 (Photosystem II light harvesting complex gene 2.3); chlorophyll binding ; K08913 light-harvesting complex II chlorophyll a/b binding protein 2	PF00481.16|PP2C; PF00504.16|Chloroa_b-bind; PB005180|Pfam-B_5180	IPR001344|Chlorophyll A-B binding protein, plant; IPR001932|Protein phosphatase 2C (PP2C)-like domain; IPR022796|Chlorophyll A-B binding protein	GO:0016020|membrane ; GO:0009765|photosynthesis, light harvesting; GO:0003824|catalytic activity	17	35	25	67	-1.01086	-1.40158	0.69	1.34	0	-1
Gh_D05G3193	D05	+	49360704	49362506	AT1G79040	photosystem II subunit R	P06183	PSBR_SOLTU Photosystem II 10 kDa polypeptide, chloroplastic OS=Solanum tuberosum GN=PSBR PE=2 SV=1	K7WNX1	K7WNX1_SOLTU Light inducible tissue-specific ST-LS1 OS=Solanum tuberosum PE=2 SV=1	ath:AT1G79040	PSBR; PSBR (photosystem II subunit R) ; K03541 photosystem II 10kDa protein	PF04725.7|PsbR	IPR006814|Photosystem II PsbR	GO:0009523|photosystem II ; GO:0042651|thylakoid membrane ; GO:0015979|photosynthesis ; GO:0009654|oxygen evolving complex	2	2	6	20	0	-1.77886	0	3.63	0	-1
Gh_A04G0428	A04	+	13303507	13305244	AT1G79040	photosystem II subunit R	P06183	PSBR_SOLTU Photosystem II 10 kDa polypeptide, chloroplastic OS=Solanum tuberosum GN=PSBR PE=2 SV=1	K7WNX1	K7WNX1_SOLTU Light inducible tissue-specific ST-LS1 OS=Solanum tuberosum PE=2 SV=1	ath:AT1G79040	PSBR; PSBR (photosystem II subunit R) ; K03541 photosystem II 10kDa protein	PF04725.7|PsbR	IPR006814|Photosystem II PsbR	GO:0009523|photosystem II ; GO:0042651|thylakoid membrane ; GO:0015979|photosynthesis ; GO:0009654|oxygen evolving complex	1	2	5	17	-0.693147	-1.76766	0.17	1.61	0	-1
Gh_A06G0403	A06	+	6709152	6718222	AT5G11450	Mog1/PsbP/DUF1795-like photosystem II reaction center PsbP family protein	P82715	PPD5_ARATH PsbP domain-containing protein 5, chloroplastic OS=Arabidopsis thaliana GN=PPD5 PE=1 SV=3	B9H9F5	B9H9F5_POPTR Predicted protein OS=Populus trichocarpa GN=POPTRDRAFT_654065 PE=4 SV=1			PF01789.11|PsbP	IPR002683|Photosystem II PsbP, oxygen evolving complex; IPR007110|Immunoglobulin-like domain	GO:0009523|photosystem II ; GO:0005515|protein binding ; GO:0019898|extrinsic to membrane ; GO:0005509|calcium ion binding ; GO:0015979|photosynthesis ; GO:0009654|oxygen evolving complex	3	5	8	19	-0.587787	-1.18958	0.45	2.04	0	-1
Gh_D06G0433	D06	+	6209459	6213780	AT5G11450	Mog1/PsbP/DUF1795-like photosystem II reaction center PsbP family protein	P82715	PPD5_ARATH PsbP domain-containing protein 5, chloroplastic OS=Arabidopsis thaliana GN=PPD5 PE=1 SV=3	B9H9F5	B9H9F5_POPTR Predicted protein OS=Populus trichocarpa GN=POPTRDRAFT_654065 PE=4 SV=1			PF01789.11|PsbP	IPR002683|Photosystem II PsbP, oxygen evolving complex; IPR007110|Immunoglobulin-like domain	GO:0009523|photosystem II ; GO:0005515|protein binding ; GO:0019898|extrinsic to membrane ; GO:0005509|calcium ion binding ; GO:0015979|photosynthesis ; GO:0009654|oxygen evolving complex	2	3	8	17	-0.133532	-1.1582	0.08	2.23	0	-1
Gh_A11G1357	A11	+	17397989	17398975	AT1G61520	photosystem I light harvesting complex gene 3	P27522	CB13_SOLLC Chlorophyll a-b binding protein 8, chloroplastic OS=Solanum lycopersicum GN=CAB8 PE=3 SV=1	I1JJU8	I1JJU8_SOYBN Uncharacterized protein OS=Glycine max PE=3 SV=1	pop:POPTR_664934	Lhca3; light-harvesting complex I protein Lhca3 ; K08909 light-harvesting complex I chlorophyll a/b binding protein 3	PF00504.16|Chloroa_b-bind	IPR001344|Chlorophyll A-B binding protein, plant; IPR022796|Chlorophyll A-B binding protein	GO:0016020|membrane ; GO:0009765|photosynthesis, light harvesting	5	11	10	25	-1.22027	-1.27015	0.77	1.45	0	-1
Gh_A05G1200	A05	+	12065549	12066226	AT1G31330	photosystem I subunit F	Q9SHE8	PSAF_ARATH Photosystem I reaction center subunit III, chloroplastic OS=Arabidopsis thaliana GN=PSAF PE=1 SV=1	A9PI20	A9PI20_POPTR Putative uncharacterized protein OS=Populus trichocarpa GN=POPTRDRAFT_709002 PE=2 SV=1	pop:POPTR_709002	hypothetical protein ; K02694 photosystem I subunit III	PF02507.10|PSI_PsaF	IPR003666|Photosystem I PsaF, reaction centre subunit III	GO:0009538|photosystem I reaction center ; GO:0015979|photosynthesis ; GO:0009522|photosystem I	57	27	18	16	1.08114	0.215709	2.08	0.22	1	0
Gh_D05G1377	D05	+	12085315	12085989	AT1G31330	photosystem I subunit F	Q9SHE8	PSAF_ARATH Photosystem I reaction center subunit III, chloroplastic OS=Arabidopsis thaliana GN=PSAF PE=1 SV=1	A9PI20	A9PI20_POPTR Putative uncharacterized protein OS=Populus trichocarpa GN=POPTRDRAFT_709002 PE=2 SV=1	pop:POPTR_709002	hypothetical protein ; K02694 photosystem I subunit III	PF02507.10|PSI_PsaF	IPR003666|Photosystem I PsaF, reaction centre subunit III	GO:0009538|photosystem I reaction center ; GO:0015979|photosynthesis ; GO:0009522|photosystem I	44	21	14	14	1.10492	0.0666912	2.77	0.1	1	0
Gh_D08G0513	D08	-	5731106	5732420	AT2G20260	photosystem I subunit E-2	Q41228	PSAEA_NICSY Photosystem I reaction center subunit IV A, chloroplastic OS=Nicotiana sylvestris GN=PSAEA PE=1 SV=1	G7KZJ5	G7KZJ5_MEDTR Photosystem I reaction center subunit IV A OS=Medicago truncatula GN=MTR_7g099390 PE=2 SV=1	pop:POPTR_711610	hypothetical protein ; K02693 photosystem I subunit IV	PF02427.12|PSI_PsaE	IPR003375|Photosystem I PsaE, reaction centre subunit IV	GO:0009538|photosystem I reaction center ; GO:0015979|photosynthesis ; GO:0009522|photosystem I	3	2	7	15	0.470004	-1.06087	0.47	2.7	0	-1
Gh_D07G1624	D07	-	31897736	31898493	AT4G12800	photosystem I subunit l	Q9SUI4	PSAL_ARATH Photosystem I reaction center subunit XI, chloroplastic OS=Arabidopsis thaliana GN=PSAL PE=1 SV=2	B9SMR5	B9SMR5_RICCO Photosystem I reaction center subunit XI, chloroplast, putative OS=Ricinus communis GN=RCOM_1628230 PE=4 SV=1	vvi:100242802	GSVIVT00025097001; hypothetical protein LOC100242802 ; K02699 photosystem I subunit XI	PF02605.10|PsaL	IPR003757|Photosystem I PsaL, reaction centre subunit XI	GO:0009538|photosystem I reaction center ; GO:0015979|photosynthesis ; GO:0009522|photosystem I	2	3	8	21	-0.91628	-1.41161	0.38	1.99	0	-1
Gh_A13G1885	A13	+	78531900	78541878	AT3G09150	phytochromobilin:ferredoxin oxidoreductase, chloroplast / phytochromobilin synthase (HY2)	Q9SR43	PFBS_ARATH Phytochromobilin:ferredoxin oxidoreductase, chloroplastic OS=Arabidopsis thaliana GN=HY2 PE=2 SV=1	M5WHM5	M5WHM5_PRUPE Uncharacterized protein OS=Prunus persica GN=PRUPE_ppa008498mg PE=4 SV=1	ath:AT3G09150	HY2; HY2 (ELONGATED HYPOCOTYL 2); phytochromobilin:ferredoxin oxidoreductase ; K08101 phytochromobilin:ferredoxin oxidoreductase [EC:1.3.7.4]	PF12861.2|zf-Apc11; PF05996.7|Fe_bilin_red	IPR001841|Zinc finger, RING-type; IPR009249|Ferredoxin-dependent bilin reductase; IPR024991|Anaphase-promoting complex subunit 11	GO:0010024|phytochromobilin biosynthetic process ; GO:0005515|protein binding ; GO:0016636|oxidoreductase activity, acting on the CH-CH group of donors, iron-sulfur protein as acceptor ; GO:0008270|zinc ion binding ; GO:0055114|oxidation-reduction process ; GO:0050897|cobalt ion binding ; GO:0005680|anaphase-promoting complex ; GO:0004842|ubiquitin-protein ligase activity	6	12	8	22	-0.930475	-1.57086	0.62	1.34	0	-1
Gh_A12G1556	A12	+	75626925	75631401	AT1G68830	STT7 homolog STN7	Q9S713	STT7_ARATH Serine/threonine-protein kinase STN7, chloroplastic OS=Arabidopsis thaliana GN=STN7 PE=1 SV=1	B9SEI7	B9SEI7_RICCO Serine/threonine protein kinase, putative OS=Ricinus communis GN=RCOM_0705590 PE=3 SV=1	cme:CMS463C	similar to serine/threonine protein kinase ; K08282 non-specific serine/threonine protein kinase [EC:2.7.11.1]	PF00069.20|Pkinase; PB002132|Pfam-B_2132	IPR000719|Protein kinase domain; IPR002290|Serine/threonine- / dual specificity protein kinase, catalytic domain; IPR008271|Serine/threonine-protein kinase, active site; IPR017441|Protein kinase, ATP binding site	GO:0005524|ATP binding ; GO:0004674|protein serine/threonine kinase activity ; GO:0004672|protein kinase activity ; GO:0006468|protein phosphorylation	14	20	30	63	-0.546544	-1.09233	0.55	2.03	0	-1
Gh_A06G1246	A06	-	89813435	89822109	AT3G14130	Aldolase-type TIM barrel family protein	Q9LJH5	GLO4_ARATH Peroxisomal (S)-2-hydroxy-acid oxidase GLO4 OS=Arabidopsis thaliana GN=GLO4 PE=2 SV=1	B9ST75	B9ST75_RICCO (S)-2-hydroxy-acid oxidase, putative OS=Ricinus communis GN=RCOM_0684810 PE=4 SV=1	pop:POPTR_555599	hypothetical protein ; K11517 (S)-2-hydroxy-acid oxidase [EC:1.1.3.15]	PF01070.13|FMN_dh	IPR000262|FMN-dependent dehydrogenase; IPR008259|FMN-dependent alpha-hydroxy acid dehydrogenase, active site; IPR012133|Alpha-hydroxy acid dehydrogenase, FMN-dependent	GO:0010181|FMN binding ; GO:0055114|oxidation-reduction process ; GO:0016491|oxidoreductase activity	39	47	42	86	-0.290874	-1.03271	0.61	2.36	0	-1
Gh_D10G0533	D10	-	5163696	5166274	AT3G14130	Aldolase-type TIM barrel family protein	Q9LJH5	GLO4_ARATH Peroxisomal (S)-2-hydroxy-acid oxidase GLO4 OS=Arabidopsis thaliana GN=GLO4 PE=2 SV=1	A5AKN6	A5AKN6_VITVI Putative uncharacterized protein OS=Vitis vinifera GN=VITISV_031318 PE=4 SV=1	ppp:PHYPADRAFT_159377	hypothetical protein ; K11517 (S)-2-hydroxy-acid oxidase [EC:1.1.3.15]	PF01070.13|FMN_dh	IPR000262|FMN-dependent dehydrogenase; IPR008259|FMN-dependent alpha-hydroxy acid dehydrogenase, active site; IPR012133|Alpha-hydroxy acid dehydrogenase, FMN-dependent	GO:0010181|FMN binding ; GO:0055114|oxidation-reduction process ; GO:0016491|oxidoreductase activity	1	3	6	17	-0.980827	-1.46358	0.38	1.91	0	-1
Gh_A01G0343	A01	+	4825885	4827479	AT3G14420	Aldolase-type TIM barrel family protein	Q9LRR9	GLO1_ARATH Peroxisomal (S)-2-hydroxy-acid oxidase GLO1 OS=Arabidopsis thaliana GN=GLO1 PE=1 SV=1	M4CNK5	M4CNK5_BRARP Uncharacterized protein OS=Brassica rapa subsp. pekinensis GN=Bra005793 PE=4 SV=1	vvi:100244701	GSVIVT00000984001; hypothetical protein LOC100244701 ; K11517 (S)-2-hydroxy-acid oxidase [EC:1.1.3.15]	PF01070.13|FMN_dh	IPR000262|FMN-dependent dehydrogenase	GO:0016491|oxidoreductase activity	11	13	12	28	-0.235566	-1.19969	0.17	1.35	0	-1
Gh_D03G1496	D03	-	44078161	44079530	AT1G12550	D-isomer specific 2-hydroxyacid dehydrogenase family protein	Q9LE33	HPR3_ARATH Glyoxylate/hydroxypyruvate reductase HPR3 OS=Arabidopsis thaliana GN=HPR3 PE=2 SV=1	B9RBY8	B9RBY8_RICCO Glycerate dehydrogenase, putative OS=Ricinus communis GN=RCOM_1682350 PE=3 SV=1	dme:Dmel_CG31674	CG31674 gene product from transcript CG31674-RA (EC:1.1.1.79); K00049 glyoxylate reductase (NADP+) [EC:1.1.1.79]	PF02826.14|2-Hacid_dh_C; PF00389.25|2-Hacid_dh	IPR006139|D-isomer specific 2-hydroxyacid dehydrogenase, catalytic domain; IPR006140|D-isomer specific 2-hydroxyacid dehydrogenase, NAD-binding	GO:0016616|oxidoreductase activity, acting on the CH-OH group of donors, NAD or NADP as acceptor ; GO:0008152|metabolic process ; GO:0051287|NAD binding ; GO:0048037|cofactor binding ; GO:0055114|oxidation-reduction process	61	30	62	50	1.03597	0.318132	2.58	1.24	1	0
Gh_A03G2001	scaffold503_A03	+	98724	100094	AT1G12550	D-isomer specific 2-hydroxyacid dehydrogenase family protein	Q9LE33	HPR3_ARATH Glyoxylate/hydroxypyruvate reductase HPR3 OS=Arabidopsis thaliana GN=HPR3 PE=2 SV=1	B9GKR7	B9GKR7_POPTR Predicted protein OS=Populus trichocarpa GN=POPTRDRAFT_1067100 PE=3 SV=1	hsa:9380	GRHPR; glyoxylate reductase/hydroxypyruvate reductase (EC:1.1.1.79); K00015 glyoxylate reductase [EC:1.1.1.26]; K00049 glyoxylate reductase (NADP+) [EC:1.1.1.79]	PF02826.14|2-Hacid_dh_C; PF00389.25|2-Hacid_dh	IPR006139|D-isomer specific 2-hydroxyacid dehydrogenase, catalytic domain; IPR006140|D-isomer specific 2-hydroxyacid dehydrogenase, NAD-binding	GO:0016616|oxidoreductase activity, acting on the CH-OH group of donors, NAD or NADP as acceptor ; GO:0008152|metabolic process ; GO:0051287|NAD binding ; GO:0048037|cofactor binding ; GO:0055114|oxidation-reduction process	34	15	18	21	1.14557	-0.209092	2.16	0.37	1	0
Gh_A02G1185	A02	-	67485819	67490603	AT1G80380	P-loop containing nucleoside triphosphate hydrolases superfamily protein	Q944I4	GLYK_ARATH D-glycerate 3-kinase, chloroplastic OS=Arabidopsis thaliana GN=GLYK PE=1 SV=2	F6HX46	F6HX46_VITVI Putative uncharacterized protein OS=Vitis vinifera GN=VIT_09s0002g05200 PE=2 SV=1			PB018845|Pfam-B_18845; PB001579|Pfam-B_1579			14	8	15	31	0.739667	-1.00106	1.65	2.88	0	-1
Gh_D05G1215	D05	+	10430378	10434248	AT1G80380	P-loop containing nucleoside triphosphate hydrolases superfamily protein	Q944I4	GLYK_ARATH D-glycerate 3-kinase, chloroplastic OS=Arabidopsis thaliana GN=GLYK PE=1 SV=2	B9RUW3	B9RUW3_RICCO D-glycerate 3-kinase, chloroplast, putative OS=Ricinus communis GN=RCOM_0895280 PE=4 SV=1			PB018845|Pfam-B_18845; PB001579|Pfam-B_1579			4	8	10	22	-0.955512	-1.18455	1.02	2.18	0	-1
Gh_D07G1759	D07	+	41639445	41640186	AT5G38430	Ribulose bisphosphate carboxylase (small chain) family protein	P31333	RBS_GOSHI Ribulose bisphosphate carboxylase small chain, chloroplastic OS=Gossypium hirsutum GN=RBCS PE=3 SV=2	K4HMF5	K4HMF5_GOSTO Ribulose bisphosphate carboxylase small chain OS=Gossypium tomentosum PE=3 SV=1	ath:AT5G38430	ribulose bisphosphate carboxylase small chain 1B / RuBisCO small subunit 1B (RBCS-1B) (ATS1B) ; K01602 ribulose-bisphosphate carboxylase small chain [EC:4.1.1.39]	PF12338.3|RbcS; PF00101.15|RuBisCO_small	IPR000894|Ribulose bisphosphate carboxylase small chain, domain; IPR024680|Ribulose-1,5-bisphosphate carboxylase small subunit, N-terminal; IPR024681|Ribulose bisphosphate carboxylase, small chain		5	12	19	22	-1.22378	-0.17185	1.69	0.52	-1	0
Gh_D13G0294	D13	-	2862641	2864253	AT4G38970	fructose-bisphosphate aldolase 2	Q944G9	ALFC2_ARATH Probable fructose-bisphosphate aldolase 2, chloroplastic OS=Arabidopsis thaliana GN=FBA2 PE=1 SV=2	G8FMI9	G8FMI9_CARPA Fructose-bisphosphate aldolase OS=Carica papaya PE=2 SV=1	vvi:100255859	GSVIVT00036826001; hypothetical protein LOC100255859 ; K01623 fructose-bisphosphate aldolase, class I [EC:4.1.2.13]	PF00274.14|Glycolytic	IPR000741|Fructose-bisphosphate aldolase, class-I	GO:0004332|fructose-bisphosphate aldolase activity ; GO:0006096|glycolysis	2	7	7	20	-1.7346	-1.55147	1.03	1.96	0	-1
Gh_D13G0295	D13	-	2869459	2871076	AT4G38970	fructose-bisphosphate aldolase 2	Q944G9	ALFC2_ARATH Probable fructose-bisphosphate aldolase 2, chloroplastic OS=Arabidopsis thaliana GN=FBA2 PE=1 SV=2	G8FMI9	G8FMI9_CARPA Fructose-bisphosphate aldolase OS=Carica papaya PE=2 SV=1	vvi:100255859	GSVIVT00036826001; hypothetical protein LOC100255859 ; K01623 fructose-bisphosphate aldolase, class I [EC:4.1.2.13]	PF00274.14|Glycolytic	IPR000741|Fructose-bisphosphate aldolase, class-I	GO:0004332|fructose-bisphosphate aldolase activity ; GO:0006096|glycolysis	2	6	6	15	-1.56862	-1.30624	1.03	1.82	0	-1
Gh_D11G0849	D11	+	7323631	7326746	AT2G45290	Transketolase	F4IW47	TKTC2_ARATH Transketolase-2, chloroplastic OS=Arabidopsis thaliana GN=TKL-2 PE=1 SV=1	B9RDA1	B9RDA1_RICCO Transketolase, putative OS=Ricinus communis GN=RCOM_1611360 PE=4 SV=1	pop:POPTR_552034	hypothetical protein ; K00615 transketolase [EC:2.2.1.1]	PF02780.15|Transketolase_C; PF00456.16|Transketolase_N; PF02779.19|Transket_pyr	IPR005474|Transketolase, N-terminal; IPR005475|Transketolase-like, pyrimidine-binding domain; IPR005476|Transketolase, C-terminal; IPR020826|Transketolase binding site	GO:0008152|metabolic process ; GO:0003824|catalytic activity	271	88	146	169	1.62408	-0.205003	3.42	0.75	1	0
Gh_A07G1360	A07	-	34079073	34082115	AT2G45290	Transketolase	F4IW47	TKTC2_ARATH Transketolase-2, chloroplastic OS=Arabidopsis thaliana GN=TKL-2 PE=1 SV=1	B9RDA1	B9RDA1_RICCO Transketolase, putative OS=Ricinus communis GN=RCOM_1611360 PE=4 SV=1	pop:POPTR_552034	hypothetical protein ; K00615 transketolase [EC:2.2.1.1]	PF02780.15|Transketolase_C; PF00456.16|Transketolase_N; PF02779.19|Transket_pyr	IPR005474|Transketolase, N-terminal; IPR005475|Transketolase-like, pyrimidine-binding domain; IPR005476|Transketolase, C-terminal; IPR020826|Transketolase binding site	GO:0008152|metabolic process ; GO:0003824|catalytic activity	129	41	136	154	1.66378	-0.179683	1.84	0.36	1	0
Gh_D07G1469	D07	-	25219450	25222493	AT2G45290	Transketolase	F4IW47	TKTC2_ARATH Transketolase-2, chloroplastic OS=Arabidopsis thaliana GN=TKL-2 PE=1 SV=1	B9RDA1	B9RDA1_RICCO Transketolase, putative OS=Ricinus communis GN=RCOM_1611360 PE=4 SV=1	pop:POPTR_552034	hypothetical protein ; K00615 transketolase [EC:2.2.1.1]	PF02780.15|Transketolase_C; PF00456.16|Transketolase_N; PF02779.19|Transket_pyr	IPR005474|Transketolase, N-terminal; IPR005475|Transketolase-like, pyrimidine-binding domain; IPR005476|Transketolase, C-terminal; IPR020826|Transketolase binding site	GO:0008152|metabolic process ; GO:0003824|catalytic activity	116	36	144	151	1.67204	-0.0617758	1.77	0.11	1	0
Gh_A11G0731	A11	+	7077101	7080209	AT2G45290	Transketolase	F4IW47	TKTC2_ARATH Transketolase-2, chloroplastic OS=Arabidopsis thaliana GN=TKL-2 PE=1 SV=1	B9RDA1	B9RDA1_RICCO Transketolase, putative OS=Ricinus communis GN=RCOM_1611360 PE=4 SV=1	pop:POPTR_552034	hypothetical protein ; K00615 transketolase [EC:2.2.1.1]	PF02780.15|Transketolase_C; PF00456.16|Transketolase_N; PF02779.19|Transket_pyr	IPR005474|Transketolase, N-terminal; IPR005475|Transketolase-like, pyrimidine-binding domain; IPR005476|Transketolase, C-terminal; IPR020826|Transketolase binding site	GO:0008152|metabolic process ; GO:0003824|catalytic activity	361	92	110	148	1.97814	-0.419467	3.66	1.21	1	0
Gh_D08G2271	D08	-	62252245	62253078	AT3G04790	Ribose 5-phosphate isomerase, type A protein	Q9ZU38	RPIA_ARATH Probable ribose-5-phosphate isomerase OS=Arabidopsis thaliana GN=At2g01290 PE=2 SV=1	B9I5E5	B9I5E5_POPTR Predicted protein OS=Populus trichocarpa GN=POPTRDRAFT_1096522 PE=1 SV=1	pop:POPTR_1096522	hypothetical protein ; K01807 ribose 5-phosphate isomerase A [EC:5.3.1.6]	PF06026.9|Rib_5-P_isom_A	IPR004788|Ribose 5-phosphate isomerase, type A	GO:0009052|pentose-phosphate shunt, non-oxidative branch ; GO:0004751|ribose-5-phosphate isomerase activity	151	59	114	107	1.34445	0.0834286	2.62	0.2	1	0
Gh_D11G2606	D11	+	54186750	54187595	AT3G04790	Ribose 5-phosphate isomerase, type A protein	Q9ZU38	RPIA_ARATH Probable ribose-5-phosphate isomerase OS=Arabidopsis thaliana GN=At2g01290 PE=2 SV=1	M5VZJ1	M5VZJ1_PRUPE Uncharacterized protein OS=Prunus persica GN=PRUPE_ppa009739mg PE=4 SV=1	pop:POPTR_1096522	hypothetical protein ; K01807 ribose 5-phosphate isomerase A [EC:5.3.1.6]	PF06026.9|Rib_5-P_isom_A	IPR004788|Ribose 5-phosphate isomerase, type A	GO:0009052|pentose-phosphate shunt, non-oxidative branch ; GO:0004751|ribose-5-phosphate isomerase activity	118	22	98	70	2.43979	0.475951	2.57	1.16	1	0
Gh_A08G1905	A08	-	99762047	99762880	AT3G04790	Ribose 5-phosphate isomerase, type A protein	Q9ZU38	RPIA_ARATH Probable ribose-5-phosphate isomerase OS=Arabidopsis thaliana GN=At2g01290 PE=2 SV=1	B9I5E5	B9I5E5_POPTR Predicted protein OS=Populus trichocarpa GN=POPTRDRAFT_1096522 PE=1 SV=1	pop:POPTR_1096522	hypothetical protein ; K01807 ribose 5-phosphate isomerase A [EC:5.3.1.6]	PF06026.9|Rib_5-P_isom_A	IPR004788|Ribose 5-phosphate isomerase, type A	GO:0009052|pentose-phosphate shunt, non-oxidative branch ; GO:0004751|ribose-5-phosphate isomerase activity	102	42	74	87	1.28093	-0.23395	1.75	0.38	1	0
Gh_A11G2295	A11	+	79016493	79017338	AT3G04790	Ribose 5-phosphate isomerase, type A protein	Q9ZU38	RPIA_ARATH Probable ribose-5-phosphate isomerase OS=Arabidopsis thaliana GN=At2g01290 PE=2 SV=1	B9REQ4	B9REQ4_RICCO Ribose-5-phosphate isomerase, putative OS=Ricinus communis GN=RCOM_1427780 PE=3 SV=1	pop:POPTR_1096522	hypothetical protein ; K01807 ribose 5-phosphate isomerase A [EC:5.3.1.6]	PF06026.9|Rib_5-P_isom_A	IPR004788|Ribose 5-phosphate isomerase, type A	GO:0009052|pentose-phosphate shunt, non-oxidative branch ; GO:0004751|ribose-5-phosphate isomerase activity	52	17	35	32	1.58163	0.133531	2.17	0.21	1	0
Gh_A07G0579	A07	+	8062591	8066889	AT5G61410	D-ribulose-5-phosphate-3-epimerase	Q43157	RPE_SPIOL Ribulose-phosphate 3-epimerase, chloroplastic OS=Spinacia oleracea GN=RPE PE=1 SV=1	B9N4C5	B9N4C5_POPTR Predicted protein OS=Populus trichocarpa GN=POPTRDRAFT_744163 PE=4 SV=1	pop:POPTR_744163	hypothetical protein ; K01783 ribulose-phosphate 3-epimerase [EC:5.1.3.1]	PF00834.14|Ribul_P_3_epim	IPR000056|Ribulose-phosphate 3-epimerase-like	GO:0005975|carbohydrate metabolic process ; GO:0016857|racemase and epimerase activity, acting on carbohydrates and derivatives	74	33	56	86	1.18973	-0.618809	1.59	1.16	1	0
Gh_D07G0644	D07	+	7524074	7528369	AT5G61410	D-ribulose-5-phosphate-3-epimerase	Q43157	RPE_SPIOL Ribulose-phosphate 3-epimerase, chloroplastic OS=Spinacia oleracea GN=RPE PE=1 SV=1	B9N4C5	B9N4C5_POPTR Predicted protein OS=Populus trichocarpa GN=POPTRDRAFT_744163 PE=4 SV=1	pop:POPTR_744163	hypothetical protein ; K01783 ribulose-phosphate 3-epimerase [EC:5.1.3.1]	PF00834.14|Ribul_P_3_epim	IPR000056|Ribulose-phosphate 3-epimerase-like	GO:0005975|carbohydrate metabolic process ; GO:0016857|racemase and epimerase activity, acting on carbohydrates and derivatives	58	22	44	60	1.3578	-0.459532	2.1	1.12	1	0
Gh_D07G1919	D07	-	47530274	47545583	AT1G55490	chaperonin 60 beta	P21241	RUBB_BRANA RuBisCO large subunit-binding protein subunit beta, chloroplastic OS=Brassica napus PE=2 SV=1	M1C7V6	M1C7V6_SOLTU Uncharacterized protein OS=Solanum tuberosum GN=PGSC0003DMG400024011 PE=3 SV=1	osa:4327993	Os02g0102900; hypothetical protein ; K04077 chaperonin GroEL	PF00118.19|Cpn60_TCP1; PF03399.11|SAC3_GANP	IPR001844|Chaperonin Cpn60; IPR002423|Chaperonin Cpn60/TCP-1; IPR005062|SAC3/GANP/Nin1/mts3/eIF-3 p25; IPR018370|Chaperonin Cpn60, conserved site	GO:0044267|cellular protein metabolic process ; GO:0006457|protein folding ; GO:0005524|ATP binding ; GO:0042026|protein refolding; GO:0005737|cytoplasm	3	9	2	15	-1.81236	-2.96522	1.91	2.38	-1	-1
Gh_A06G1451	A06	+	97410424	97414474	AT1G73110	P-loop containing nucleoside triphosphate hydrolases superfamily protein	Q9ZT00	RCA_MAIZE Ribulose bisphosphate carboxylase/oxygenase activase, chloroplastic OS=Zea mays GN=RCA1 PE=2 SV=3	K7M428	K7M428_SOYBN Uncharacterized protein OS=Glycine max PE=4 SV=1	vvi:100266898	GSVIVT00038106001; hypothetical protein LOC100266898 ; K10908 DNA-directed RNA polymerase, mitochondrial [EC:2.7.7.6]	PF14700.1|RPOL_N; PF00004.24|AAA	IPR003959|ATPase, AAA-type, core; IPR011525|Aux/IAA-ARF-dimerisation	GO:0005524|ATP binding ; GO:0046983|protein dimerization activity	3	7	5	16	-1.35455	-1.74044	0.98	1.94	0	-1
Gh_A06G0571	A06	+	14784662	14785331	AT1G73110	P-loop containing nucleoside triphosphate hydrolases superfamily protein	Q9ZT00	RCA_MAIZE Ribulose bisphosphate carboxylase/oxygenase activase, chloroplastic OS=Zea mays GN=RCA1 PE=2 SV=3	B9GLS2	B9GLS2_POPTR Predicted protein OS=Populus trichocarpa GN=POPTRDRAFT_1065652 PE=4 SV=1						5	7	4	14	-0.575364	-1.83828	0.48	1.65	0	-1
Gh_D05G0106	D05	-	1168935	1173635	AT4G20130	plastid transcriptionally active 14	Q9XI84	RBCMT_ARATH [Fructose-bisphosphate aldolase]-lysine N-methyltransferase, chloroplastic OS=Arabidopsis thaliana GN=LSMT-L PE=1 SV=1	M5WHC5	M5WHC5_PRUPE Uncharacterized protein OS=Prunus persica GN=PRUPE_ppa004855mg PE=4 SV=1	ath:AT1G14030	ribulose-1,5 bisphosphate carboxylase oxygenase large subunit N-methyltransferase, putative ; K00592 [ribulose-bisphosphate carboxylase]-lysine N-methyltransferase [EC:2.1.1.127]	PF09273.6|Rubis-subs-bind; PF00856.23|SET	IPR001214|SET domain; IPR015353|Rubisco LS methyltransferase, substrate-binding domain	GO:0005515|protein binding	2	5	6	22	-0.944462	-1.91239	0.34	1.62	0	-1
Gh_Sca110300G01	scaffold110300	-	188	370	AT5G20280	sucrose phosphate synthase 1F	O22060	SPSA1_CITUN Probable sucrose-phosphate synthase 1 OS=Citrus unshiu GN=SPS1 PE=2 SV=1	A5C869	A5C869_VITVI Putative uncharacterized protein OS=Vitis vinifera GN=VITISV_036457 PE=4 SV=1	vvi:100241955	GSVIVT00006423001; hypothetical protein LOC100241955 ; K00696 sucrose-phosphate synthase [EC:2.4.1.14]	PB003068|Pfam-B_3068			4	3	7	20	0.628592	-1.51706	0.32	1.92	0	-1
Gh_D04G1683	D04	+	48982321	48984571	AT1G43670	Inositol monophosphatase family protein	Q43139	F16P2_SACHY Fructose-1,6-bisphosphatase, cytosolic OS=Saccharum hybrid GN=CFBP PE=2 SV=2	K4DFY4	K4DFY4_SOLLC Uncharacterized protein OS=Solanum lycopersicum GN=Solyc12g056530.1 PE=3 SV=1	pop:POPTR_714722	hypothetical protein ; K03841 fructose-1,6-bisphosphatase I [EC:3.1.3.11]	PF00316.15|FBPase	IPR000146|Fructose-1,6-bisphosphatase class 1/Sedoheputulose-1,7-bisphosphatase; IPR020548|Fructose-1,6-bisphosphatase, active site	GO:0005975|carbohydrate metabolic process ; GO:0042578|phosphoric ester hydrolase activity ; GO:0042132|fructose 1,6-bisphosphate 1-phosphatase activity	8	8	10	23	0.0235304	-1.21302	0.04	2.96	0	-1
Gh_A11G2212	A11	-	76346612	76360633	AT5G18480	plant glycogenin-like starch initiation protein 6	Q8GWB7	GUX6_ARATH Putative glucuronosyltransferase PGSIP6 OS=Arabidopsis thaliana GN=PGSIP6 PE=2 SV=1	B9I5R1	B9I5R1_POPTR Predicted protein OS=Populus trichocarpa GN=POPTRDRAFT_571125 PE=4 SV=1	bfo:BRAFLDRAFT_257976	hypothetical protein ; K00750 glycogenin glucosyltransferase [EC:2.4.1.186]	PF00931.17|NB-ARC; PF01501.15|Glyco_transf_8	IPR002182|NB-ARC; IPR002495|Glycosyl transferase, family 8	GO:0043531|ADP binding ; GO:0016757|transferase activity, transferring glycosyl groups	8	34	10	44	-2.05162	-2.11177	1.34	1.6	-1	-1
Gh_A07G0561	A07	+	7796722	7801462	AT1G74910	ADP-glucose pyrophosphorylase family protein	Q7SXP8	GMPAB_DANRE Mannose-1-phosphate guanyltransferase alpha-B OS=Danio rerio GN=gmppab PE=2 SV=1	M1CA88	M1CA88_SOLTU Uncharacterized protein OS=Solanum tuberosum GN=PGSC0003DMG402024581 PE=4 SV=1	mcc:703756	GMPPA; GDP-mannose pyrophosphorylase A ; K00971 mannose-1-phosphate guanylyltransferase [EC:2.7.7.22]	PF00132.19|Hexapep; PF00483.18|NTP_transferase; PB009845|Pfam-B_9845	IPR001451|Bacterial transferase hexapeptide repeat; IPR005835|Nucleotidyl transferase	GO:0009058|biosynthetic process ; GO:0016779|nucleotidyltransferase activity	28	33	63	139	-0.213419	-1.15537	0.3	2.95	0	-1
Gh_A07G1759	A07	+	71990087	71992754	AT5G48300	ADP glucose pyrophosphorylase 1	P52417	GLGS2_VICFA Glucose-1-phosphate adenylyltransferase small subunit 2, chloroplastic OS=Vicia faba GN=AGPP PE=2 SV=1	I1JJP2	I1JJP2_SOYBN Glucose-1-phosphate adenylyltransferase OS=Glycine max PE=3 SV=1	vvi:100240927	GSVIVT00029046001; hypothetical protein LOC100240927 ; K00975 glucose-1-phosphate adenylyltransferase [EC:2.7.7.27]	PB014406|Pfam-B_14406; PB004015|Pfam-B_4015; PF00483.18|NTP_transferase	IPR005835|Nucleotidyl transferase; IPR005836|ADP-glucose pyrophosphorylase, conserved site	GO:0005978|glycogen biosynthetic process; GO:0009058|biosynthetic process ; GO:0008878|glucose-1-phosphate adenylyltransferase activity; GO:0016779|nucleotidyltransferase activity	10	13	13	26	-0.491408	-1.00045	0.47	1.41	0	-1
Gh_D09G1782	D09	+	45420378	45423579	AT1G32900	UDP-Glycosyltransferase superfamily protein	O82627	SSG1_ANTMA Granule-bound starch synthase 1, chloroplastic/amyloplastic OS=Antirrhinum majus GN=WAXY PE=2 SV=1	C8YQU9	C8YQU9_GOSHI Granule-bound starch synthase 1 OS=Gossypium hirsutum PE=2 SV=1	ppp:PHYPADRAFT_202950	hypothetical protein ; K00703 starch synthase [EC:2.4.1.21]	PF00534.15|Glycos_transf_1; PB003465|Pfam-B_3465; PF08323.6|Glyco_transf_5; PB013834|Pfam-B_13834; PB012438|Pfam-B_12438	IPR001296|Glycosyl transferase, family 1; IPR013534|Starch synthase, catalytic domain	GO:0009058|biosynthetic process	7	9	19	45	-0.340927	-1.23356	0.13	1.47	0	-1
Gh_A09G2368	scaffold2295_A09	+	9710	12913	AT1G32900	UDP-Glycosyltransferase superfamily protein	O82627	SSG1_ANTMA Granule-bound starch synthase 1, chloroplastic/amyloplastic OS=Antirrhinum majus GN=WAXY PE=2 SV=1	C8YQU9	C8YQU9_GOSHI Granule-bound starch synthase 1 OS=Gossypium hirsutum PE=2 SV=1	ppp:PHYPADRAFT_202950	hypothetical protein ; K00703 starch synthase [EC:2.4.1.21]	PF00534.15|Glycos_transf_1; PB003465|Pfam-B_3465; PF08323.6|Glyco_transf_5; PB013834|Pfam-B_13834; PB012438|Pfam-B_12438	IPR001296|Glycosyl transferase, family 1; IPR013534|Starch synthase, catalytic domain	GO:0009058|biosynthetic process	4	6	10	25	-0.470004	-1.25768	0.54	2.73	0	-1
Gh_A09G0145	A09	-	3545966	3549877	AT3G01180	starch synthase 2	Q43847	SSY2_SOLTU Granule-bound starch synthase 2, chloroplastic/amyloplastic OS=Solanum tuberosum GN=SS2 PE=1 SV=3	B3SRP3	B3SRP3_MANES Starch synthase isoform II OS=Manihot esculenta GN=SSII PE=2 SV=1	vvi:100261002	similar to starch synthase ; K00703 starch synthase [EC:2.4.1.21]	PF00534.15|Glycos_transf_1; PB011566|Pfam-B_11566; PF08323.6|Glyco_transf_5; PB013834|Pfam-B_13834; PB012438|Pfam-B_12438; PB007495|Pfam-B_7495	IPR001296|Glycosyl transferase, family 1; IPR013534|Starch synthase, catalytic domain	GO:0009058|biosynthetic process	7	7	10	20	0.0307717	-1.06015	0.03	1.83	0	-1
Gh_D10G1430	D10	+	30734521	30736573	AT4G18240	starch synthase 4	Q0WVX5	SSY4_ARATH Probable starch synthase 4, chloroplastic/amyloplastic OS=Arabidopsis thaliana GN=SS4 PE=2 SV=1	M1AF51	M1AF51_SOLTU Uncharacterized protein OS=Solanum tuberosum GN=PGSC0003DMG400008322 PE=3 SV=1	olu:OSTLU_41853	predicted protein; K00703 starch synthase [EC:2.4.1.21]	PB013834|Pfam-B_13834			24	7	4	9	1.79176	-1.14161	2.02	0.88	1	0
Gh_D05G2667	D05	-	27878444	27883598	AT4G18240	starch synthase 4	Q0WVX5	SSY4_ARATH Probable starch synthase 4, chloroplastic/amyloplastic OS=Arabidopsis thaliana GN=SS4 PE=2 SV=1	Q9XGC1	Q9XGC1_VIGUN Starch synthase, isoform V OS=Vigna unguiculata PE=2 SV=1	olu:OSTLU_41853	predicted protein; K00703 starch synthase [EC:2.4.1.21]	PF00534.15|Glycos_transf_1	IPR001296|Glycosyl transferase, family 1	GO:0009058|biosynthetic process	4	8	7	18	-1.19625	-1.40229	0.7	1.34	0	-1
Gh_D08G1051	D08	+	29556056	29557050	AT4G18240	starch synthase 4	Q0WVX5	SSY4_ARATH Probable starch synthase 4, chloroplastic/amyloplastic OS=Arabidopsis thaliana GN=SS4 PE=2 SV=1	M5WM80	M5WM80_PRUPE Uncharacterized protein OS=Prunus persica GN=PRUPE_ppa000758mg PE=4 SV=1						3	4	6	15	-0.485508	-1.28292	0.26	1.65	0	-1
Gh_A02G1412	A02	+	79796081	79804950	AT5G65685	UDP-Glycosyltransferase superfamily protein	Q0WVX5	SSY4_ARATH Probable starch synthase 4, chloroplastic/amyloplastic OS=Arabidopsis thaliana GN=SS4 PE=2 SV=1	B2ZGM8	B2ZGM8_VITVI Starch synthase V OS=Vitis vinifera PE=2 SV=1	vvi:100233071	starch synthase VI ; K00703 starch synthase [EC:2.4.1.21]	PF08323.6|Glyco_transf_5; PB013834|Pfam-B_13834	IPR013534|Starch synthase, catalytic domain		9	14	19	41	-0.670674	-1.10823	0.83	2.27	0	-1
Gh_D03G0307	D03	-	3501848	3510830	AT5G65685	UDP-Glycosyltransferase superfamily protein	Q0WVX5	SSY4_ARATH Probable starch synthase 4, chloroplastic/amyloplastic OS=Arabidopsis thaliana GN=SS4 PE=2 SV=1	B2ZGM8	B2ZGM8_VITVI Starch synthase V OS=Vitis vinifera PE=2 SV=1	vvi:100233071	starch synthase VI ; K00703 starch synthase [EC:2.4.1.21]	PF08323.6|Glyco_transf_5; PB013834|Pfam-B_13834	IPR013534|Starch synthase, catalytic domain		6	11	17	36	-0.76214	-1.08426	2.3	4.15	0	-1
Gh_D11G1909	D11	-	22899717	22903410	AT2G36390	starch branching enzyme 2.1	O23647	GLGB1_ARATH 1,4-alpha-glucan-branching enzyme 2-1, chloroplastic/amyloplastic OS=Arabidopsis thaliana GN=SBE2.1 PE=1 SV=1	B3U2B7	B3U2B7_CUCSA Starch branching enzyme I OS=Cucumis sativus PE=4 SV=1	pop:POPTR_589574	hypothetical protein ; K00700 1,4-alpha-glucan branching enzyme [EC:2.4.1.18]		IPR015902|Glycoside hydrolase, family 13	GO:0003824|catalytic activity	3	16	5	27	-2.50322	-2.51939	2.77	3.41	-1	-1
Gh_D05G3059	D05	+	42115153	42118495	AT2G36390	starch branching enzyme 2.1	O23647	GLGB1_ARATH 1,4-alpha-glucan-branching enzyme 2-1, chloroplastic/amyloplastic OS=Arabidopsis thaliana GN=SBE2.1 PE=1 SV=1	R4QZ41	R4QZ41_9ROSI Starch branching enzyme II (Fragment) OS=Rhizophora apiculata x Rhizophora stylosa GN=SBE2 PE=4 SV=1	ath:AT2G36390	SBE2.1; SBE2.1 (STARCH BRANCHING ENZYME 2.1); 1,4-alpha-glucan branching enzyme ; K00700 1,4-alpha-glucan branching enzyme [EC:2.4.1.18]	PF00128.19|Alpha-amylase	IPR006047|Glycosyl hydrolase, family 13, catalytic domain; IPR015902|Glycoside hydrolase, family 13	GO:0043169|cation binding ; GO:0005975|carbohydrate metabolic process ; GO:0003824|catalytic activity	2	7	6	16	-1.63761	-1.49951	1.05	1.73	0	-1
Gh_D01G2020	D01	+	59092523	59102437	AT5G03650	starch branching enzyme 2.2	Q9LZS3	GLGB2_ARATH 1,4-alpha-glucan-branching enzyme 2-2, chloroplastic/amyloplastic OS=Arabidopsis thaliana GN=SBE2.2 PE=1 SV=1	M5VWN8	M5VWN8_PRUPE Uncharacterized protein OS=Prunus persica GN=PRUPE_ppa001312mg PE=4 SV=1	pop:POPTR_589574	hypothetical protein ; K00700 1,4-alpha-glucan branching enzyme [EC:2.4.1.18]	PB010702|Pfam-B_10702; PF00128.19|Alpha-amylase; PF02922.13|CBM_48; PF02806.13|Alpha-amylase_C; PB001017|Pfam-B_1017	IPR004193|Glycoside hydrolase, family 13, N-terminal; IPR006047|Glycosyl hydrolase, family 13, catalytic domain; IPR006048|Alpha-amylase, C-terminal all beta; IPR006589|Glycosyl hydrolase, family 13, subfamily, catalytic domain; IPR015902|Glycoside hydrolase, family 13	GO:0043169|cation binding ; GO:0004553|hydrolase activity, hydrolyzing O-glycosyl compounds ; GO:0005975|carbohydrate metabolic process ; GO:0003824|catalytic activity	24	29	51	109	-0.272415	-1.09402	0.16	1.52	0	-1
Gh_D08G0883	D08	-	16654338	16654699	AT5G03650	starch branching enzyme 2.2	Q9LZS3	GLGB2_ARATH 1,4-alpha-glucan-branching enzyme 2-2, chloroplastic/amyloplastic OS=Arabidopsis thaliana GN=SBE2.2 PE=1 SV=1	B3U2B7	B3U2B7_CUCSA Starch branching enzyme I OS=Cucumis sativus PE=4 SV=1	pop:POPTR_589574	hypothetical protein ; K00700 1,4-alpha-glucan branching enzyme [EC:2.4.1.18]		IPR015902|Glycoside hydrolase, family 13	GO:0003824|catalytic activity	4	16	5	19	-2.17128	-1.87877	1.23	1.35	0	-1
Gh_D10G1939	D10	+	54236632	54240787	AT5G03650	starch branching enzyme 2.2	Q08047	GLGB_MAIZE 1,4-alpha-glucan-branching enzyme 2, chloroplastic/amyloplastic OS=Zea mays GN=SBE1 PE=1 SV=1	M0SZ56	M0SZ56_MUSAM Uncharacterized protein OS=Musa acuminata subsp. malaccensis PE=4 SV=1	sbi:SORBI_06g015360	SORBIDRAFT_06g015360; hypothetical protein ; K00700 1,4-alpha-glucan branching enzyme [EC:2.4.1.18]				3	8	4	14	-1.21302	-1.84952	1.29	2.13	0	-1
Gh_D04G0065	D04	-	899890	921306	AT2G39930	isoamylase 1	O04196	ISOA1_ARATH Isoamylase 1, chloroplastic OS=Arabidopsis thaliana GN=ISA1 PE=1 SV=1	A4PIS8	A4PIS8_PHAVU Isoamylase-type starch-debranching enzyme 1 OS=Phaseolus vulgaris GN=PvISA1 PE=2 SV=1	pop:POPTR_560622	hypothetical protein ; K02438 glycogen operon protein GlgX [EC:3.2.1.-]	PF00128.19|Alpha-amylase; PB014892|Pfam-B_14892; PB004101|Pfam-B_4101; PB011318|Pfam-B_11318; PF02922.13|CBM_48; PB002695|Pfam-B_2695	IPR004193|Glycoside hydrolase, family 13, N-terminal; IPR006047|Glycosyl hydrolase, family 13, catalytic domain; IPR006589|Glycosyl hydrolase, family 13, subfamily, catalytic domain; IPR015902|Glycoside hydrolase, family 13	GO:0043169|cation binding ; GO:0004553|hydrolase activity, hydrolyzing O-glycosyl compounds ; GO:0005975|carbohydrate metabolic process ; GO:0003824|catalytic activity	13	28	34	88	-1.05762	-1.38474	1.56	3.09	-1	-1
Gh_A05G3543	A05	+	91139703	91164282	AT2G39930	isoamylase 1	O04196	ISOA1_ARATH Isoamylase 1, chloroplastic OS=Arabidopsis thaliana GN=ISA1 PE=1 SV=1	B9HAL8	B9HAL8_POPTR Predicted protein OS=Populus trichocarpa GN=POPTRDRAFT_560622 PE=4 SV=1	pop:POPTR_560622	hypothetical protein ; K02438 glycogen operon protein GlgX [EC:3.2.1.-]	PF00128.19|Alpha-amylase; PB014892|Pfam-B_14892; PB004101|Pfam-B_4101; PB011318|Pfam-B_11318; PF02922.13|CBM_48; PB002695|Pfam-B_2695	IPR004193|Glycoside hydrolase, family 13, N-terminal; IPR006047|Glycosyl hydrolase, family 13, catalytic domain; IPR006589|Glycosyl hydrolase, family 13, subfamily, catalytic domain; IPR015902|Glycoside hydrolase, family 13	GO:0043169|cation binding ; GO:0004553|hydrolase activity, hydrolyzing O-glycosyl compounds ; GO:0005975|carbohydrate metabolic process ; GO:0003824|catalytic activity	12	24	19	55	-1.08379	-1.5079	1.21	2.27	0	-1
Gh_D07G2424	scaffold4175_D07	+	59753	63170	AT1G66430	pfkB-like carbohydrate kinase family protein	Q9M1B9	SCRK4_ARATH Probable fructokinase-4 OS=Arabidopsis thaliana GN=At3g59480 PE=2 SV=1	I6U6M6	I6U6M6_GOSHE FRK3 OS=Gossypium herbaceum PE=2 SV=1	pop:POPTR_800560	hypothetical protein ; K00847 fructokinase [EC:2.7.1.4]	PF00294.19|PfkB	IPR002139|Ribokinase; IPR002173|Carbohydrate/puine kinase, PfkB, conserved site; IPR011611|Carbohydrate kinase PfkB	GO:0016773|phosphotransferase activity, alcohol group as acceptor ; GO:0004747|ribokinase activity; GO:0006014|D-ribose metabolic process	10	6	6	13	0.693147	-1.09859	0.89	1.46	0	-1
Gh_D10G1259	D10	-	22841105	22844027	AT3G59480	pfkB-like carbohydrate kinase family protein	Q42896	SCRK2_SOLLC Fructokinase-2 OS=Solanum lycopersicum GN=FRK2 PE=1 SV=2	D2D2Z5	D2D2Z5_GOSHI Fructokinase OS=Gossypium hirsutum PE=1 SV=1	vvi:100245852	GSVIVT00001970001; hypothetical protein LOC100245852 ; K00847 fructokinase [EC:2.7.1.4]	PF00294.19|PfkB	IPR002139|Ribokinase; IPR002173|Carbohydrate/puine kinase, PfkB, conserved site; IPR011611|Carbohydrate kinase PfkB	GO:0016773|phosphotransferase activity, alcohol group as acceptor ; GO:0004747|ribokinase activity; GO:0006014|D-ribose metabolic process	57	19	111	155	1.59631	-0.483567	1.91	1.82	1	0
Gh_A10G1235	A10	+	64369238	64372186	AT3G59480	pfkB-like carbohydrate kinase family protein	Q42896	SCRK2_SOLLC Fructokinase-2 OS=Solanum lycopersicum GN=FRK2 PE=1 SV=2	D2D2Z5	D2D2Z5_GOSHI Fructokinase OS=Gossypium hirsutum PE=1 SV=1	pop:POPTR_562225	hypothetical protein ; K00847 fructokinase [EC:2.7.1.4]	PF00294.19|PfkB	IPR002139|Ribokinase; IPR002173|Carbohydrate/puine kinase, PfkB, conserved site; IPR011611|Carbohydrate kinase PfkB	GO:0016773|phosphotransferase activity, alcohol group as acceptor ; GO:0004747|ribokinase activity; GO:0006014|D-ribose metabolic process	59	22	106	150	1.43037	-0.505033	2.14	2.08	1	0
Gh_A13G1557	A13	-	74379205	74382555	AT1G56560	Plant neutral invertase family protein	Q67XD9	CINV2_ARATH Alkaline/neutral invertase CINV2 OS=Arabidopsis thaliana GN=CINV2 PE=2 SV=1	H6V7I6	H6V7I6_MANES Neutral/alkaline invertase OS=Manihot esculenta GN=NINV7 PE=2 SV=1			PF12899.2|Glyco_hydro_100	IPR024746|Glycosyl hydrolase family 100	GO:0033926|glycopeptide alpha-N-acetylgalactosaminidase activity	2	5	6	17	-1.34373	-1.60941	0.57	1.46	0	-1
Gh_A10G1562	A10	-	85211695	85214555	AT3G06500	Plant neutral invertase family protein	Q67XD9	CINV2_ARATH Alkaline/neutral invertase CINV2 OS=Arabidopsis thaliana GN=CINV2 PE=2 SV=1	B9RZV8	B9RZV8_RICCO Beta-fructofuranosidase, putative OS=Ricinus communis GN=RCOM_1002060 PE=4 SV=1			PF12899.2|Glyco_hydro_100	IPR024746|Glycosyl hydrolase family 100	GO:0033926|glycopeptide alpha-N-acetylgalactosaminidase activity	22	7	23	25	1.56862	-0.0825208	1.82	0.15	1	0
Gh_A01G1070	A01	-	39087273	39091786	AT5G22510	alkaline/neutral invertase	Q67XD9	CINV2_ARATH Alkaline/neutral invertase CINV2 OS=Arabidopsis thaliana GN=CINV2 PE=2 SV=1	I7EV10	I7EV10_LITCN Neutral invertase OS=Litchi chinensis GN=NI PE=2 SV=1			PF12899.2|Glyco_hydro_100	IPR024746|Glycosyl hydrolase family 100	GO:0033926|glycopeptide alpha-N-acetylgalactosaminidase activity	7	7	10	29	4.64562e-10	-1.54835	0	1.97	0	-1
Gh_A13G1881	A13	+	78479800	78483583	AT1G50460	hexokinase-like 1	Q9LPS1	HXK3_ARATH Hexokinase-3 OS=Arabidopsis thaliana GN=At1g50460 PE=1 SV=1	B9HP03	B9HP03_POPTR Predicted protein OS=Populus trichocarpa GN=POPTRDRAFT_768035 PE=3 SV=1	pop:POPTR_797614	hypothetical protein ; K00844 hexokinase [EC:2.7.1.1]	PF00349.16|Hexokinase_1; PF03727.11|Hexokinase_2	IPR001312|Hexokinase; IPR019807|Hexokinase, conserved site; IPR022672|Hexokinase, N-terminal; IPR022673|Hexokinase, C-terminal	GO:0005524|ATP binding ; GO:0016773|phosphotransferase activity, alcohol group as acceptor ; GO:0006096|glycolysis ; GO:0005975|carbohydrate metabolic process ; GO:0004396|hexokinase activity	9	12	9	18	-0.287682	-1.07551	0.31	1.4	0	-1
Gh_D05G0363	D05	-	3036699	3040187	AT3G43190	sucrose synthase 4	P13708	SUSY_SOYBN Sucrose synthase OS=Glycine max GN=SS PE=1 SV=2	I1T4R2	I1T4R2_GOSHI Sucrose synthase OS=Gossypium hirsutum subsp. latifolium PE=3 SV=1	ath:AT3G43190	SUS4; SUS4; UDP-glycosyltransferase/ sucrose synthase/ transferase, transferring glycosyl groups ; K00695 sucrose synthase [EC:2.4.1.13]	PF00534.15|Glycos_transf_1; PB010052|Pfam-B_10052; PF00862.14|Sucrose_synth	IPR000368|Sucrose synthase; IPR001296|Glycosyl transferase, family 1; IPR012820|Sucrose synthase, plant/cyanobacteria	GO:0009058|biosynthetic process ; GO:0016157|sucrose synthase activity; GO:0005985|sucrose metabolic process	686	275	1079	994	1.31764	0.118468	1.92	0.33	1	0
Gh_A05G3937	scaffold1240_A05	-	40524	44014	AT3G43190	sucrose synthase 4	P13708	SUSY_SOYBN Sucrose synthase OS=Glycine max GN=SS PE=1 SV=2	I1T4R1	I1T4R1_GOSHI Sucrose synthase OS=Gossypium hirsutum subsp. latifolium PE=3 SV=1	ath:AT3G43190	SUS4; SUS4; UDP-glycosyltransferase/ sucrose synthase/ transferase, transferring glycosyl groups ; K00695 sucrose synthase [EC:2.4.1.13]	PF00534.15|Glycos_transf_1; PB010052|Pfam-B_10052; PF00862.14|Sucrose_synth	IPR000368|Sucrose synthase; IPR001296|Glycosyl transferase, family 1; IPR012820|Sucrose synthase, plant/cyanobacteria	GO:0009058|biosynthetic process ; GO:0016157|sucrose synthase activity; GO:0005985|sucrose metabolic process	573	259	817	772	1.14503	0.0816867	1.68	0.18	1	0
Gh_D13G2037	D13	+	55853500	55856852	AT3G43190	sucrose synthase 4	P13708	SUSY_SOYBN Sucrose synthase OS=Glycine max GN=SS PE=1 SV=2	G1JRK7	G1JRK7_GOSHI Sucrose synthase OS=Gossypium hirsutum PE=2 SV=1	ath:AT3G43190	SUS4; SUS4; UDP-glycosyltransferase/ sucrose synthase/ transferase, transferring glycosyl groups ; K00695 sucrose synthase [EC:2.4.1.13]	PF00534.15|Glycos_transf_1; PB010052|Pfam-B_10052; PF00862.14|Sucrose_synth	IPR000368|Sucrose synthase; IPR001296|Glycosyl transferase, family 1; IPR012820|Sucrose synthase, plant/cyanobacteria	GO:0009058|biosynthetic process ; GO:0016157|sucrose synthase activity; GO:0005985|sucrose metabolic process	13	11	247	761	0.254854	-1.62578	0.03	2.67	0	-1
Gh_A13G1673	A13	+	75647743	75651096	AT3G43190	sucrose synthase 4	P13708	SUSY_SOYBN Sucrose synthase OS=Glycine max GN=SS PE=1 SV=2	G9BRX5	G9BRX5_GOSAR Sucrose synthase OS=Gossypium arboreum PE=2 SV=1	ath:AT3G43190	SUS4; SUS4; UDP-glycosyltransferase/ sucrose synthase/ transferase, transferring glycosyl groups ; K00695 sucrose synthase [EC:2.4.1.13]	PF00534.15|Glycos_transf_1; PB010052|Pfam-B_10052; PF00862.14|Sucrose_synth	IPR000368|Sucrose synthase; IPR001296|Glycosyl transferase, family 1; IPR012820|Sucrose synthase, plant/cyanobacteria	GO:0009058|biosynthetic process ; GO:0016157|sucrose synthase activity; GO:0005985|sucrose metabolic process	12	10	218	592	0.278626	-1.43981	0.03	2.28	0	-1
Gh_D07G0139	D07	-	1486343	1491132	AT3G43190	sucrose synthase 4	P13708	SUSY_SOYBN Sucrose synthase OS=Glycine max GN=SS PE=1 SV=2	I6QYQ8	I6QYQ8_GOSAR Sucrose synthase OS=Gossypium arboreum PE=2 SV=1	ath:AT3G43190	SUS4; SUS4; UDP-glycosyltransferase/ sucrose synthase/ transferase, transferring glycosyl groups ; K00695 sucrose synthase [EC:2.4.1.13]	PF00534.15|Glycos_transf_1; PB010052|Pfam-B_10052; PF00862.14|Sucrose_synth	IPR000368|Sucrose synthase; IPR001296|Glycosyl transferase, family 1; IPR012820|Sucrose synthase, plant/cyanobacteria	GO:0009058|biosynthetic process ; GO:0016157|sucrose synthase activity; GO:0005985|sucrose metabolic process	3	1	43	158	1.09861	-1.88042	0.22	3.69	0	-1
Gh_Sca127487G01	scaffold127487	-	92	265	AT3G43190	sucrose synthase 4	P13708	SUSY_SOYBN Sucrose synthase OS=Glycine max GN=SS PE=1 SV=2	Q9ZRC4	Q9ZRC4_GOSHI Sucrose synthase (Fragment) OS=Gossypium hirsutum PE=2 SV=1	ath:AT3G43190	SUS4; SUS4; UDP-glycosyltransferase/ sucrose synthase/ transferase, transferring glycosyl groups ; K00695 sucrose synthase [EC:2.4.1.13]	PF00862.14|Sucrose_synth	IPR000368|Sucrose synthase; IPR012820|Sucrose synthase, plant/cyanobacteria	GO:0016157|sucrose synthase activity; GO:0005985|sucrose metabolic process	2	1	13	46	0.287682	-1.84714	0.03	1.5	0	-1
Gh_A07G0146	A07	-	1833210	1837769	AT3G43190	sucrose synthase 4	P13708	SUSY_SOYBN Sucrose synthase OS=Glycine max GN=SS PE=1 SV=2	I6QYQ8	I6QYQ8_GOSAR Sucrose synthase OS=Gossypium arboreum PE=2 SV=1	ath:AT3G43190	SUS4; SUS4; UDP-glycosyltransferase/ sucrose synthase/ transferase, transferring glycosyl groups ; K00695 sucrose synthase [EC:2.4.1.13]	PF00534.15|Glycos_transf_1; PB010052|Pfam-B_10052; PF00862.14|Sucrose_synth	IPR000368|Sucrose synthase; IPR001296|Glycosyl transferase, family 1; IPR012820|Sucrose synthase, plant/cyanobacteria	GO:0009058|biosynthetic process ; GO:0016157|sucrose synthase activity; GO:0005985|sucrose metabolic process	3	2	12	31	0.287698	-1.36203	0.1	2.26	0	-1
Gh_A02G0913	A02	-	34669074	34689596	AT3G23640	heteroglycan glucosidase 1	Q9F234	AGL2_BACTQ Alpha-glucosidase 2 OS=Bacillus thermoamyloliquefaciens PE=3 SV=1	D7U407	D7U407_VITVI Putative uncharacterized protein OS=Vitis vinifera GN=VIT_02s0033g01410 PE=2 SV=1	lma:LmjF18.0090	alpha glucosidase II subunit (EC:3.2.1.20); K01187 alpha-glucosidase [EC:3.2.1.20]	PF01055.21|Glyco_hydro_31; PF13802.1|Gal_mutarotas_2	IPR000322|Glycoside hydrolase, family 31; IPR025887|Glycoside hydrolase family 31, N-terminal domain	GO:0004553|hydrolase activity, hydrolyzing O-glycosyl compounds ; GO:0005975|carbohydrate metabolic process	40	54	56	122	-0.434735	-1.12753	0.85	2.6	0	-1
Gh_D02G1142	D02	-	34188197	34200666	AT1G69830	alpha-amylase-like 3	Q94A41	AMY3_ARATH Alpha-amylase 3, chloroplastic OS=Arabidopsis thaliana GN=AMY3 PE=2 SV=1	B9S2B5	B9S2B5_RICCO Alpha-amylase, putative OS=Ricinus communis GN=RCOM_0697970 PE=4 SV=1	osa:4342055	Os06g0713800; hypothetical protein ; K01176 alpha-amylase [EC:3.2.1.1]	PF00128.19|Alpha-amylase; PB005052|Pfam-B_5052; PF07821.7|Alpha-amyl_C2	IPR006047|Glycosyl hydrolase, family 13, catalytic domain; IPR006589|Glycosyl hydrolase, family 13, subfamily, catalytic domain; IPR012850|Alpha-amylase, C-terminal beta-sheet; IPR015902|Glycoside hydrolase, family 13	GO:0043169|cation binding ; GO:0004556|alpha-amylase activity ; GO:0005509|calcium ion binding ; GO:0005975|carbohydrate metabolic process ; GO:0003824|catalytic activity	5	7	9	19	-0.330242	-1.12781	0.2	1.33	0	-1
Gh_D11G0932	D11	-	8079122	8088177	AT2G45880	beta-amylase 7	O80831	BAM7_ARATH Beta-amylase 7 OS=Arabidopsis thaliana GN=BAM7 PE=2 SV=2	J7I638	J7I638_PONTR Beta-amylase 6 OS=Poncirus trifoliata GN=BAM6 PE=2 SV=1	ath:AT4G17090	CT-BMY; CT-BMY (BETA-AMYLASE 3, BETA-AMYLASE 8); beta-amylase ; K01177 beta-amylase [EC:3.2.1.2]	PF01373.12|Glyco_hydro_14; PF05687.8|DUF822; PB009865|Pfam-B_9865	IPR001371|Glycoside hydrolase, family 14B, plant; IPR001554|Glycoside hydrolase, family 14; IPR008540|BZR1, transcriptional repressor; IPR018238|Glycoside hydrolase, family 14, conserved site	GO:0000272|polysaccharide catabolic process ; GO:0016161|beta-amylase activity	7	19	12	33	-1.40877	-1.42872	2.1	2.78	-1	-1
Gh_Sca005596G01	scaffold5596	-	7232	9831	AT3G23920	beta-amylase 1	Q9LIR6	BAM1_ARATH Beta-amylase 1, chloroplastic OS=Arabidopsis thaliana GN=BAM1 PE=1 SV=1	J7ICW8	J7ICW8_PONTR Beta-amylase OS=Poncirus trifoliata GN=BAM2 PE=2 SV=1	ath:AT4G17090	CT-BMY; CT-BMY (BETA-AMYLASE 3, BETA-AMYLASE 8); beta-amylase ; K01177 beta-amylase [EC:3.2.1.2]	PF01373.12|Glyco_hydro_14; PB009865|Pfam-B_9865	IPR001371|Glycoside hydrolase, family 14B, plant; IPR001554|Glycoside hydrolase, family 14; IPR018238|Glycoside hydrolase, family 14, conserved site	GO:0000272|polysaccharide catabolic process ; GO:0016161|beta-amylase activity	32	13	76	92	1.32428	-0.278189	1.4	0.9	1	0
Gh_A12G1931	A12	+	82069606	82071988	AT4G17090	chloroplast beta-amylase	O23553	BAM3_ARATH Beta-amylase 3, chloroplastic OS=Arabidopsis thaliana GN=BAM3 PE=1 SV=3	B9MTV8	B9MTV8_POPTR Predicted protein OS=Populus trichocarpa GN=POPTRDRAFT_589941 PE=3 SV=1	ath:AT4G17090	CT-BMY; CT-BMY (BETA-AMYLASE 3, BETA-AMYLASE 8); beta-amylase ; K01177 beta-amylase [EC:3.2.1.2]	PF01373.12|Glyco_hydro_14; PB009865|Pfam-B_9865	IPR001371|Glycoside hydrolase, family 14B, plant; IPR001554|Glycoside hydrolase, family 14; IPR018238|Glycoside hydrolase, family 14, conserved site	GO:0000272|polysaccharide catabolic process ; GO:0016161|beta-amylase activity	4	4	5	15	0.125151	-1.56862	0.09	1.95	0	-1
Gh_D05G2096	D05	+	19506346	19523303	AT4G24450	phosphoglucan, water dikinase	Q9STV0	GWD2_ARATH Alpha-glucan water dikinase 2 OS=Arabidopsis thaliana GN=GWD2 PE=2 SV=3	M5XQ70	M5XQ70_PRUPE Uncharacterized protein OS=Prunus persica GN=PRUPE_ppa000345mg PE=4 SV=1	ath:AT1G10760	SEX1; SEX1 (STARCH EXCESS 1) ; K08244 alpha-glucan, water dikinase [EC:2.7.9.4]	PF01326.14|PPDK_N; PF02268.11|TFIIA_gamma_N; PB002413|Pfam-B_2413	IPR002192|Pyruvate phosphate dikinase, PEP/pyruvate-binding; IPR015872|Transcription initiation factor IIA, gamma subunit, N-terminal	GO:0005672|transcription factor TFIIA complex ; GO:0016310|phosphorylation ; GO:0005524|ATP binding ; GO:0016301|kinase activity ; GO:0006367|transcription initiation from RNA polymerase II promoter	4	15	12	22	-1.8718	-0.858661	1.46	1.32	-1	0
Gh_A07G0647	A07	+	9469947	9477024	AT5G16150	plastidic GLC translocator	Q56ZZ7	PLST4_ARATH Plastidic glucose transporter 4 OS=Arabidopsis thaliana GN=At5g16150 PE=1 SV=2	Q539E7	Q539E7_VITVI Plastid hexose transporter OS=Vitis vinifera GN=VIT_14s0006g02720 PE=2 SV=1	cfa:403997	SLC2A3; solute carrier family 2 (facilitated glucose transporter), member 3 ; K08142 MFS transporter, SP family, solute carrier family 2 (facilitated glucose transporter), member 3	PF00083.19|Sugar_tr; PB010816|Pfam-B_10816	IPR003663|Sugar/inositol transporter; IPR005828|General substrate transporter; IPR005829|Sugar transporter, conserved site; IPR020846|Major facilitator superfamily domain	GO:0016020|membrane ; GO:0006810|transport ; GO:0055085|transmembrane transport ; GO:0016021|integral to membrane ; GO:0022891|substrate-specific transmembrane transporter activity; GO:0022857|transmembrane transporter activity ; GO:0005215|transporter activity	16	11	30	69	0.554996	-1.22754	0.29	1.66	0	-1
Gh_A10G0259	A10	-	2268304	2271744	AT5G46110	Glucose-6-phosphate/phosphate translocator-related	P21727	TPT_PEA Triose phosphate/phosphate translocator, chloroplastic OS=Pisum sativum PE=1 SV=1	B9RB94	B9RB94_RICCO Triose phosphate/phosphate translocator, chloroplast, putative OS=Ricinus communis GN=RCOM_1673220 PE=4 SV=1			PF03151.11|TPT	IPR004853|Triose-phosphate transporter domain		41	19	16	19	1.09164	-0.255344	1.78	0.28	1	0
Gh_D10G0259	D10	-	2213705	2217282	AT5G46110	Glucose-6-phosphate/phosphate translocator-related	P21727	TPT_PEA Triose phosphate/phosphate translocator, chloroplastic OS=Pisum sativum PE=1 SV=1	B9RB94	B9RB94_RICCO Triose phosphate/phosphate translocator, chloroplast, putative OS=Ricinus communis GN=RCOM_1673220 PE=4 SV=1			PF03151.11|TPT	IPR004853|Triose-phosphate transporter domain		34	16	15	15	1.13294	-0.0696747	1.8	0.07	1	0
Gh_A05G2482	A05	+	32615468	32632432	AT5G04360	limit dextrinase	Q8GTR4	PULA1_ARATH Pullulanase 1, chloroplastic OS=Arabidopsis thaliana GN=PU1 PE=1 SV=2	M5XR33	M5XR33_PRUPE Uncharacterized protein OS=Prunus persica GN=PRUPE_ppa000905mg PE=4 SV=1	ath:AT5G38990	protein kinase family protein ; K04733 interleukin-1 receptor-associated kinase 4 [EC:2.7.11.1]	PF00069.20|Pkinase; PF00128.19|Alpha-amylase; PB000663|Pfam-B_663; PF02922.13|CBM_48; PF11852.3|DUF3372	IPR000719|Protein kinase domain; IPR002290|Serine/threonine- / dual specificity protein kinase, catalytic domain; IPR004193|Glycoside hydrolase, family 13, N-terminal; IPR006047|Glycosyl hydrolase, family 13, catalytic domain; IPR008271|Serine/threonine-protein kinase, active site; IPR015902|Glycoside hydrolase, family 13; IPR020635|Tyrosine-protein kinase, catalytic domain; IPR024561|Alpha-1,6-g…	GO:0005524|ATP binding ; GO:0006468|protein phosphorylation ; GO:0003824|catalytic activity ; GO:0043169|cation binding ; GO:0004553|hydrolase activity, hydrolyzing O-glycosyl compounds ; GO:0004713|protein tyrosine kinase activity; GO:0004674|protein serine/threonine kinase activity ; GO:0004672|protein kinase activity ; GO:0005975|carbohydrate metabolic process	36	45	56	117	-0.313001	-1.05146	0.38	2.04	0	-1
Gh_D04G1954	scaffold3948_D04	-	74815	79901	AT3G52180	dual specificity protein phosphatase (DsPTP1) family protein	Q9FEB5	DSP4_ARATH Phosphoglucan phosphatase DSP4, chloroplastic OS=Arabidopsis thaliana GN=DSP4 PE=1 SV=1	B9T3V0	B9T3V0_RICCO Phosphoprotein phosphatase, putative OS=Ricinus communis GN=RCOM_0114250 PE=4 SV=1	spu:592944	hypothetical LOC592944 ; K07199 5'-AMP-activated protein kinase, regulatory beta subunit	PF00782.15|DSPc	IPR000340|Dual specificity phosphatase, catalytic domain; IPR000387|Protein-tyrosine/Dual specificity phosphatase; IPR020422|Dual specificity phosphatase, subgroup, catalytic domain	GO:0008138|protein tyrosine/serine/threonine phosphatase activity ; GO:0006470|protein dephosphorylation ; GO:0016311|dephosphorylation ; GO:0016791|phosphatase activity	14	13	17	34	0.124455	-1.02092	0.31	3	0	-1
Gh_A05G3108	A05	-	80204471	80207570	AT5G40390	Raffinose synthase family protein	Q9FND9	RFS5_ARATH Probable galactinol--sucrose galactosyltransferase 5 OS=Arabidopsis thaliana GN=RFS5 PE=1 SV=1	B9SF88	B9SF88_RICCO Stachyose synthase, putative OS=Ricinus communis GN=RCOM_1095590 PE=4 SV=1	ath:AT5G40390	SIP1; SIP1 (SEED IMBIBITION 1-LIKE); galactinol-sucrose galactosyltransferase/ hydrolase, hydrolyzing O-glycosyl compounds ; K06611 stachyose synthetase [EC:2.4.1.67]	PF05691.7|Raffinose_syn	IPR008811|Glycosyl hydrolases 36		92	24	8	9	1.91193	-0.161315	2.36	0.06	1	0
Gh_D04G0532	D04	+	9112360	9115448	AT5G40390	Raffinose synthase family protein	Q9FND9	RFS5_ARATH Probable galactinol--sucrose galactosyltransferase 5 OS=Arabidopsis thaliana GN=RFS5 PE=1 SV=1	B9SF88	B9SF88_RICCO Stachyose synthase, putative OS=Ricinus communis GN=RCOM_1095590 PE=4 SV=1	ath:AT5G40390	SIP1; SIP1 (SEED IMBIBITION 1-LIKE); galactinol-sucrose galactosyltransferase/ hydrolase, hydrolyzing O-glycosyl compounds ; K06611 stachyose synthetase [EC:2.4.1.67]	PF05691.7|Raffinose_syn	IPR008811|Glycosyl hydrolases 36		54	14	7	6	1.91144	0.1053	1.9	0.03	1	0
Gh_A13G1088	A13	-	61109340	61112995	AT1G55740	seed imbibition 1	Q84VX0	RFS1_ARATH Probable galactinol--sucrose galactosyltransferase 1 OS=Arabidopsis thaliana GN=RFS1 PE=2 SV=1	B9SXA4	B9SXA4_RICCO Stachyose synthase, putative OS=Ricinus communis GN=RCOM_0268570 PE=4 SV=1	ath:AT5G40390	SIP1; SIP1 (SEED IMBIBITION 1-LIKE); galactinol-sucrose galactosyltransferase/ hydrolase, hydrolyzing O-glycosyl compounds ; K06611 stachyose synthetase [EC:2.4.1.67]	PF05691.7|Raffinose_syn	IPR008811|Glycosyl hydrolases 36		12	13	14	32	-0.158224	-1.2364	0.24	2.53	0	-1
Gh_A01G1088	A01	-	40994773	40999830	AT3G57520	seed imbibition 2	Q94A08	RFS2_ARATH Probable galactinol--sucrose galactosyltransferase 2 OS=Arabidopsis thaliana GN=RFS2 PE=2 SV=2	E6NUE9	E6NUE9_9ROSI JMS10C05.2 protein OS=Jatropha curcas GN=JMS10C05.2 PE=4 SV=1	ath:AT5G40390	SIP1; SIP1 (SEED IMBIBITION 1-LIKE); galactinol-sucrose galactosyltransferase/ hydrolase, hydrolyzing O-glycosyl compounds ; K06611 stachyose synthetase [EC:2.4.1.67]	PF05691.7|Raffinose_syn	IPR008811|Glycosyl hydrolases 36		9	10	39	89	-0.206362	-1.19291	0.14	2.74	0	-1
Gh_A12G1687	A12	+	78608898	78610543	AT3G57520	seed imbibition 2	Q94A08	RFS2_ARATH Probable galactinol--sucrose galactosyltransferase 2 OS=Arabidopsis thaliana GN=RFS2 PE=2 SV=2	B9RAR3	B9RAR3_RICCO Hydrolase, hydrolyzing O-glycosyl compounds, putative OS=Ricinus communis GN=RCOM_1508050 PE=4 SV=1	ath:AT5G40390	SIP1; SIP1 (SEED IMBIBITION 1-LIKE); galactinol-sucrose galactosyltransferase/ hydrolase, hydrolyzing O-glycosyl compounds ; K06611 stachyose synthetase [EC:2.4.1.67]	PF05691.7|Raffinose_syn	IPR008811|Glycosyl hydrolases 36		3	2	5	18	0.587826	-1.89462	0.4	2.68	0	-1
Gh_A12G1117	A12	-	64479773	64482711	AT4G01970	stachyose synthase	Q93XK2	STSYN_PEA Stachyose synthase OS=Pisum sativum GN=STS1 PE=1 SV=1	M5XML9	M5XML9_PRUPE Uncharacterized protein OS=Prunus persica GN=PRUPE_ppa001276mg PE=4 SV=1	ath:AT5G40390	SIP1; SIP1 (SEED IMBIBITION 1-LIKE); galactinol-sucrose galactosyltransferase/ hydrolase, hydrolyzing O-glycosyl compounds ; K06611 stachyose synthetase [EC:2.4.1.67]	PF05691.7|Raffinose_syn	IPR008811|Glycosyl hydrolases 36		61	15	5	11	2.03777	-1.00277	2.71	0.7	1	0
Gh_D12G1244	D12	-	40467416	40470283	AT4G01970	stachyose synthase	Q93XK2	STSYN_PEA Stachyose synthase OS=Pisum sativum GN=STS1 PE=1 SV=1	M5XML9	M5XML9_PRUPE Uncharacterized protein OS=Prunus persica GN=PRUPE_ppa001276mg PE=4 SV=1	ath:AT5G40390	SIP1; SIP1 (SEED IMBIBITION 1-LIKE); galactinol-sucrose galactosyltransferase/ hydrolase, hydrolyzing O-glycosyl compounds ; K06611 stachyose synthetase [EC:2.4.1.67]	PF05691.7|Raffinose_syn	IPR008811|Glycosyl hydrolases 36		23	7	6	8	1.66501	-0.432866	2.33	0.45	1	0
Gh_D09G0762	D09	-	31935067	31941705	AT1G78580	trehalose-6-phosphate synthase	Q9SYM4	TPS1_ARATH Alpha,alpha-trehalose-phosphate synthase [UDP-forming] 1 OS=Arabidopsis thaliana GN=TPS1 PE=1 SV=1	B9S8H7	B9S8H7_RICCO Trehalose-6-phosphate synthase, putative OS=Ricinus communis GN=RCOM_1253000 PE=4 SV=1	ath:AT1G78580	ATTPS1; ATTPS1 (TREHALOSE-6-PHOSPHATE SYNTHASE); transferase, transferring glycosyl groups ; K00697 alpha,alpha-trehalose-phosphate synthase (UDP-forming) [EC:2.4.1.15]	PF00982.16|Glyco_transf_20; PF02358.11|Trehalose_PPase	IPR001830|Glycosyl transferase, family 20; IPR003337|Trehalose-phosphatase	GO:0005992|trehalose biosynthetic process ; GO:0003824|catalytic activity	6	15	13	23	-1.26743	-0.890315	2.16	2.31	-1	0
Gh_D05G1451	D05	-	12924780	12930643	AT1G78580	trehalose-6-phosphate synthase	Q9SYM4	TPS1_ARATH Alpha,alpha-trehalose-phosphate synthase [UDP-forming] 1 OS=Arabidopsis thaliana GN=TPS1 PE=1 SV=1	M5WR99	M5WR99_PRUPE Uncharacterized protein OS=Prunus persica GN=PRUPE_ppa001057mg PE=4 SV=1	ath:AT1G78580	ATTPS1; ATTPS1 (TREHALOSE-6-PHOSPHATE SYNTHASE); transferase, transferring glycosyl groups ; K00697 alpha,alpha-trehalose-phosphate synthase (UDP-forming) [EC:2.4.1.15]	PF00982.16|Glyco_transf_20; PF02358.11|Trehalose_PPase	IPR001830|Glycosyl transferase, family 20; IPR003337|Trehalose-phosphatase	GO:0005992|trehalose biosynthetic process ; GO:0003824|catalytic activity	6	11	15	35	-0.836248	-1.25277	1.43	3.14	0	-1
Gh_A09G0760	A09	-	53686914	53693545	AT1G78580	trehalose-6-phosphate synthase	Q9SYM4	TPS1_ARATH Alpha,alpha-trehalose-phosphate synthase [UDP-forming] 1 OS=Arabidopsis thaliana GN=TPS1 PE=1 SV=1	B9S8H7	B9S8H7_RICCO Trehalose-6-phosphate synthase, putative OS=Ricinus communis GN=RCOM_1253000 PE=4 SV=1	ath:AT1G78580	ATTPS1; ATTPS1 (TREHALOSE-6-PHOSPHATE SYNTHASE); transferase, transferring glycosyl groups ; K00697 alpha,alpha-trehalose-phosphate synthase (UDP-forming) [EC:2.4.1.15]	PF00982.16|Glyco_transf_20; PF02358.11|Trehalose_PPase	IPR001830|Glycosyl transferase, family 20; IPR003337|Trehalose-phosphatase	GO:0005992|trehalose biosynthetic process ; GO:0003824|catalytic activity	7	13	9	21	-0.960462	-1.168	2.76	3.55	0	-1
Gh_A05G1280	A05	-	13009952	13015788	AT1G78580	trehalose-6-phosphate synthase	Q9SYM4	TPS1_ARATH Alpha,alpha-trehalose-phosphate synthase [UDP-forming] 1 OS=Arabidopsis thaliana GN=TPS1 PE=1 SV=1	M5WR99	M5WR99_PRUPE Uncharacterized protein OS=Prunus persica GN=PRUPE_ppa001057mg PE=4 SV=1	ath:AT1G78580	ATTPS1; ATTPS1 (TREHALOSE-6-PHOSPHATE SYNTHASE); transferase, transferring glycosyl groups ; K00697 alpha,alpha-trehalose-phosphate synthase (UDP-forming) [EC:2.4.1.15]	PF00982.16|Glyco_transf_20; PF02358.11|Trehalose_PPase	IPR001830|Glycosyl transferase, family 20; IPR003337|Trehalose-phosphatase	GO:0005992|trehalose biosynthetic process ; GO:0003824|catalytic activity	5	7	10	34	-0.510833	-1.81708	0.38	2.38	0	-1
Gh_D12G2173	D12	-	54813129	54815333	AT4G22590	Haloacid dehalogenase-like hydrolase (HAD) superfamily protein	Q9SUW0	TPPG_ARATH Probable trehalose-phosphate phosphatase G OS=Arabidopsis thaliana GN=TPPG PE=2 SV=1	M5WDF3	M5WDF3_PRUPE Uncharacterized protein OS=Prunus persica GN=PRUPE_ppa014788mg PE=4 SV=1	ppp:PHYPADRAFT_151258	hypothetical protein ; K01087 trehalose-phosphatase [EC:3.1.3.12]	PF02358.11|Trehalose_PPase	IPR003337|Trehalose-phosphatase	GO:0005992|trehalose biosynthetic process ; GO:0003824|catalytic activity	13	3	16	41	2.24543	-1.32991	1.95	3.03	1	-1
Gh_Sca011773G01	scaffold11773	-	213	2107	AT1G68020	UDP-Glycosyltransferase / trehalose-phosphatase family protein	Q94AH8	TPS6_ARATH Alpha,alpha-trehalose-phosphate synthase [UDP-forming] 6 OS=Arabidopsis thaliana GN=TPS6 PE=1 SV=2	B9SNF1	B9SNF1_RICCO Trehalose-6-phosphate synthase, putative OS=Ricinus communis GN=RCOM_1148340 PE=4 SV=1	ath:AT1G06410	ATTPS7; ATTPS7 (Arabidopsis thaliana trehalose-phosphatase/synthase 7); transferase, transferring glycosyl groups / trehalose-phosphatase ; K00697 alpha,alpha-trehalose-phosphate synthase (UDP-forming) [EC:2.4.1.15]; K01087 trehalose-phosphatase [EC:3.1.3.12]	PF00982.16|Glyco_transf_20; PF02358.11|Trehalose_PPase	IPR001830|Glycosyl transferase, family 20; IPR003337|Trehalose-phosphatase	GO:0005992|trehalose biosynthetic process ; GO:0003824|catalytic activity	64	32	65	75	1.02398	-0.208401	2.52	0.89	1	0
Gh_A12G2364	A12	-	86146767	86147561	AT5G51970	GroES-like zinc-binding alcohol dehydrogenase family protein	Q9FJ95	DHSO_ARATH Sorbitol dehydrogenase OS=Arabidopsis thaliana GN=SDH PE=1 SV=1	M1D596	M1D596_SOLTU Uncharacterized protein OS=Solanum tuberosum GN=PGSC0003DMG400032154 PE=3 SV=1	ath:AT5G51970	sorbitol dehydrogenase, putative / L-iditol 2-dehydrogenase, putative ; K00008 L-iditol 2-dehydrogenase [EC:1.1.1.14]	PF08240.7|ADH_N	IPR002085|Alcohol dehydrogenase superfamily, zinc-type; IPR013154|Alcohol dehydrogenase GroES-like	GO:0008270|zinc ion binding ; GO:0055114|oxidation-reduction process ; GO:0016491|oxidoreductase activity	2	9	2	14	-2.52573	-2.87915	1.33	1.67	-1	-1
Gh_A12G2363	A12	-	86146068	86146733	AT5G51970	GroES-like zinc-binding alcohol dehydrogenase family protein	Q1PSI9	IDND_VITVI L-idonate 5-dehydrogenase OS=Vitis vinifera GN=VIT_16s0100g00290 PE=1 SV=2	I3S011	I3S011_LOTJA Uncharacterized protein OS=Lotus japonicus PE=2 SV=1	ath:AT5G51970	sorbitol dehydrogenase, putative / L-iditol 2-dehydrogenase, putative ; K00008 L-iditol 2-dehydrogenase [EC:1.1.1.14]	PF00107.21|ADH_zinc_N	IPR002085|Alcohol dehydrogenase superfamily, zinc-type; IPR013149|Alcohol dehydrogenase, C-terminal	GO:0008270|zinc ion binding ; GO:0055114|oxidation-reduction process ; GO:0016491|oxidoreductase activity	3	5	2	16	-0.693094	-2.77259	0.36	1.59	0	-1
Gh_A02G0642	A02	+	10155534	10161863	AT1G71710	DNAse I-like superfamily protein	Q84MA2	IP5P1_ARATH Type I inositol 1,4,5-trisphosphate 5-phosphatase 1 OS=Arabidopsis thaliana GN=IP5P1 PE=1 SV=2	F6H6R6	F6H6R6_VITVI Putative uncharacterized protein OS=Vitis vinifera GN=VIT_18s0157g00210 PE=4 SV=1	ddi:DDB_0191151	Dd5P4; RhoGAP domain-containing protein ; K01099 phosphatidylinositol-bisphosphatase [EC:3.1.3.36]	PF03372.18|Exo_endo_phos	IPR000300|Inositol polyphosphate-related phosphatase; IPR005135|Endonuclease/exonuclease/phosphatase	GO:0046856|phosphatidylinositol dephosphorylation	13	24	17	40	-0.845554	-1.2419	1.44	2.35	0	-1
Gh_A06G1010	A06	-	49876962	49884034	AT1G71710	DNAse I-like superfamily protein	Q84MA2	IP5P1_ARATH Type I inositol 1,4,5-trisphosphate 5-phosphatase 1 OS=Arabidopsis thaliana GN=IP5P1 PE=1 SV=2	F6H6R6	F6H6R6_VITVI Putative uncharacterized protein OS=Vitis vinifera GN=VIT_18s0157g00210 PE=4 SV=1	ddi:DDB_0191151	Dd5P4; RhoGAP domain-containing protein ; K01099 phosphatidylinositol-bisphosphatase [EC:3.1.3.36]	PF03372.18|Exo_endo_phos	IPR000300|Inositol polyphosphate-related phosphatase; IPR005135|Endonuclease/exonuclease/phosphatase	GO:0046856|phosphatidylinositol dephosphorylation	4	5	8	18	-0.18256	-1.13846	0.11	1.64	0	-1
Gh_D09G1885	D09	+	46321050	46325131	AT4G18010	myo-inositol polyphosphate 5-phosphatase 2	Q9FUR2	IP5P2_ARATH Type I inositol 1,4,5-trisphosphate 5-phosphatase 2 OS=Arabidopsis thaliana GN=IP5P2 PE=1 SV=2	B9MTY7	B9MTY7_POPTR Predicted protein (Fragment) OS=Populus trichocarpa GN=POPTRDRAFT_739892 PE=4 SV=1	ddi:DDB_0191151	Dd5P4; RhoGAP domain-containing protein ; K01099 phosphatidylinositol-bisphosphatase [EC:3.1.3.36]	PF03372.18|Exo_endo_phos	IPR000300|Inositol polyphosphate-related phosphatase; IPR005135|Endonuclease/exonuclease/phosphatase	GO:0046856|phosphatidylinositol dephosphorylation	2	12	15	22	-2.48491	-0.516691	1.44	1.03	-1	0
Gh_A12G1916	A12	-	81889507	81892899	AT4G18010	myo-inositol polyphosphate 5-phosphatase 2	Q9FUR2	IP5P2_ARATH Type I inositol 1,4,5-trisphosphate 5-phosphatase 2 OS=Arabidopsis thaliana GN=IP5P2 PE=1 SV=2	B9N2R2	B9N2R2_POPTR Predicted protein OS=Populus trichocarpa GN=POPTRDRAFT_924832 PE=4 SV=1	ddi:DDB_0191151	Dd5P4; RhoGAP domain-containing protein ; K01099 phosphatidylinositol-bisphosphatase [EC:3.1.3.36]	PF03372.18|Exo_endo_phos; PB003731|Pfam-B_3731	IPR000300|Inositol polyphosphate-related phosphatase; IPR005135|Endonuclease/exonuclease/phosphatase	GO:0046856|phosphatidylinositol dephosphorylation	1	2	16	33	-0.8473	-1.04198	0.19	1.74	0	-1
Gh_A02G1268	A02	-	74614634	74617431	AT2G22240	myo-inositol-1-phosphate synthase 2	Q9LW96	INO1_TOBAC Inositol-3-phosphate synthase OS=Nicotiana tabacum PE=2 SV=1	D2D2Z4	D2D2Z4_GOSHI Myo-inositol-1-phosphate synthase OS=Gossypium hirsutum PE=2 SV=1	pop:POPTR_831371	hypothetical protein ; K01858 myo-inositol-1-phosphate synthase [EC:5.5.1.4]	PF07994.7|NAD_binding_5; PF01658.12|Inos-1-P_synth	IPR002587|Myo-inositol-1-phosphate synthase; IPR013021|Myo-inositol-1-phosphate synthase, GAPDH-like	GO:0008654|phospholipid biosynthetic process ; GO:0006021|inositol biosynthetic process ; GO:0004512|inositol-3-phosphate synthase activity	377	179	57	94	1.07783	-0.715555	2.08	0.6	1	0
Gh_A05G1099	A05	-	11204282	11206472	AT1G14520	myo-inositol oxygenase 1	Q8L799	MIOX1_ARATH Inositol oxygenase 1 OS=Arabidopsis thaliana GN=MIOX1 PE=2 SV=1	D7U067	D7U067_VITVI Putative uncharacterized protein OS=Vitis vinifera GN=VIT_09s0002g02940 PE=2 SV=1	ath:AT1G14520	MIOX1; MIOX1 (MYO-INISITOL OXYGENASE); oxidoreductase ; K00469 inositol oxygenase [EC:1.13.99.1]	PF05153.10|DUF706	IPR007828|Inositol oxygenase	GO:0019310|inositol catabolic process ; GO:0005506|iron ion binding ; GO:0055114|oxidation-reduction process ; GO:0005737|cytoplasm ; GO:0050113|inositol oxygenase activity	26	10	7	9	1.33223	-0.376478	2.74	0.64	1	0
Gh_D05G1390	D05	-	12302497	12305561	AT1G31190	myo-inositol monophosphatase like 1	Q94F00	IMPL1_ARATH Phosphatase IMPL1, chloroplastic OS=Arabidopsis thaliana GN=IMPL1 PE=1 SV=2	B9NA67	B9NA67_POPTR Predicted protein OS=Populus trichocarpa GN=POPTRDRAFT_586756 PE=4 SV=1	pop:POPTR_586756	hypothetical protein ; K01092 myo-inositol-1(or 4)-monophosphatase [EC:3.1.3.25]	PB002290|Pfam-B_2290; PF00459.20|Inositol_P	IPR000760|Inositol monophosphatase; IPR020550|Inositol monophosphatase, conserved site; IPR020583|Inositol monophosphatase, metal-binding site	GO:0046854|phosphatidylinositol phosphorylation	6	7	10	22	-0.21511	-1.11571	0.28	2.52	0	-1
Gh_A05G1213	A05	-	12229835	12232970	AT1G31190	myo-inositol monophosphatase like 1	Q94F00	IMPL1_ARATH Phosphatase IMPL1, chloroplastic OS=Arabidopsis thaliana GN=IMPL1 PE=1 SV=2	B9NA67	B9NA67_POPTR Predicted protein OS=Populus trichocarpa GN=POPTRDRAFT_586756 PE=4 SV=1	pop:POPTR_586756	hypothetical protein ; K01092 myo-inositol-1(or 4)-monophosphatase [EC:3.1.3.25]	PB002290|Pfam-B_2290; PF00459.20|Inositol_P	IPR000760|Inositol monophosphatase; IPR020583|Inositol monophosphatase, metal-binding site	GO:0046854|phosphatidylinositol phosphorylation	4	6	10	24	-0.693285	-1.24286	0.38	1.68	0	-1
Gh_A11G1089	A11	+	12722044	12726492	AT1G04420	NAD(P)-linked oxidoreductase superfamily protein	P0A9T5	TAS_SHIFL Protein tas OS=Shigella flexneri GN=tas PE=3 SV=1	B9IE88	B9IE88_POPTR Predicted protein OS=Populus trichocarpa GN=POPTRDRAFT_666263 PE=4 SV=1	afm:AFUA_2G01410	aldo-keto reductase (EC:1.1.1.-); K00100	PF00248.16|Aldo_ket_red	IPR001395|Aldo/keto reductase; IPR023210|NADP-dependent oxidoreductase domain		4	8	5	20	-0.838329	-1.93908	1.33	2.97	0	-1
Gh_D11G1240	D11	+	11709162	11713622	AT1G04420	NAD(P)-linked oxidoreductase superfamily protein	P0A9T5	TAS_SHIFL Protein tas OS=Shigella flexneri GN=tas PE=3 SV=1	B9IE88	B9IE88_POPTR Predicted protein OS=Populus trichocarpa GN=POPTRDRAFT_666263 PE=4 SV=1	afm:AFUA_2G01410	aldo-keto reductase (EC:1.1.1.-); K00100	PF00248.16|Aldo_ket_red	IPR001395|Aldo/keto reductase; IPR023210|NADP-dependent oxidoreductase domain		4	8	3	19	-0.838334	-2.47799	1.43	3.08	0	-1
Gh_A05G3292	A05	-	86302700	86305844	AT1G06690	NAD(P)-linked oxidoreductase superfamily protein	Q94A68	Y1669_ARATH Uncharacterized oxidoreductase At1g06690, chloroplastic OS=Arabidopsis thaliana GN=At1g06690 PE=1 SV=1	B9GSR0	B9GSR0_POPTR Predicted protein OS=Populus trichocarpa GN=POPTRDRAFT_816159 PE=4 SV=1	olu:OSTLU_16993	predicted protein; K05885 2,5-diketo-D-gluconate reductase [EC:1.1.1.274]	PF00248.16|Aldo_ket_red	IPR001395|Aldo/keto reductase; IPR018170|Aldo/keto reductase, conserved site; IPR020471|Aldo/keto reductase subgroup; IPR023210|NADP-dependent oxidoreductase domain	GO:0055114|oxidation-reduction process ; GO:0016491|oxidoreductase activity	7	9	15	41	-0.348307	-1.49821	0.47	3.08	0	-1
Gh_A04G0900	A04	+	57338670	57340979	AT1G49350	pfkB-like carbohydrate kinase family protein	P30235	PSUK_ECOLI Pseudouridine kinase OS=Escherichia coli (strain K12) GN=psuK PE=1 SV=2	M5VIF9	M5VIF9_PRUPE Uncharacterized protein OS=Prunus persica GN=PRUPE_ppa006480mg PE=4 SV=1	dre:415207	rbks; ribokinase (EC:2.7.1.15); K00852 ribokinase [EC:2.7.1.15]	PF00294.19|PfkB	IPR002139|Ribokinase; IPR002173|Carbohydrate/puine kinase, PfkB, conserved site; IPR011611|Carbohydrate kinase PfkB	GO:0016773|phosphotransferase activity, alcohol group as acceptor ; GO:0004747|ribokinase activity; GO:0006014|D-ribose metabolic process	14	19	22	51	-0.515466	-1.20683	0.33	1.37	0	-1
Gh_A05G0686	A05	+	7198690	7202249	AT2G27680	NAD(P)-linked oxidoreductase superfamily protein	Q94A68	Y1669_ARATH Uncharacterized oxidoreductase At1g06690, chloroplastic OS=Arabidopsis thaliana GN=At1g06690 PE=1 SV=1	M5VYN0	M5VYN0_PRUPE Uncharacterized protein OS=Prunus persica GN=PRUPE_ppa007011mg PE=4 SV=1	olu:OSTLU_16993	predicted protein; K05885 2,5-diketo-D-gluconate reductase [EC:1.1.1.274]	PF00248.16|Aldo_ket_red	IPR001395|Aldo/keto reductase; IPR023210|NADP-dependent oxidoreductase domain		4	5	7	22	-0.251367	-1.60934	0.12	1.79	0	-1
Gh_D05G0832	D05	+	6966207	6969772	AT2G27680	NAD(P)-linked oxidoreductase superfamily protein	Q94A68	Y1669_ARATH Uncharacterized oxidoreductase At1g06690, chloroplastic OS=Arabidopsis thaliana GN=At1g06690 PE=1 SV=1	M5VYN0	M5VYN0_PRUPE Uncharacterized protein OS=Prunus persica GN=PRUPE_ppa007011mg PE=4 SV=1	olu:OSTLU_16993	predicted protein; K05885 2,5-diketo-D-gluconate reductase [EC:1.1.1.274]	PF00248.16|Aldo_ket_red	IPR001395|Aldo/keto reductase; IPR023210|NADP-dependent oxidoreductase domain		2	6	6	22	-1.42578	-1.79176	2.31	4.02	-1	-1
Gh_D09G1444	D09	-	42062497	42064248	AT2G37760	NAD(P)-linked oxidoreductase superfamily protein	O80944	AKRC8_ARATH Aldo-keto reductase family 4 member C8 OS=Arabidopsis thaliana GN=AKR4C8 PE=1 SV=2	D7MW56	D7MW56_ARALL Putative uncharacterized protein OS=Arabidopsis lyrata subsp. lyrata GN=ARALYDRAFT_333154 PE=4 SV=1	osa:4338987	Os05g0456300; hypothetical protein ; K00002 alcohol dehydrogenase (NADP+) [EC:1.1.1.2]	PF00248.16|Aldo_ket_red	IPR001395|Aldo/keto reductase; IPR018170|Aldo/keto reductase, conserved site; IPR020471|Aldo/keto reductase subgroup; IPR023210|NADP-dependent oxidoreductase domain	GO:0055114|oxidation-reduction process ; GO:0016491|oxidoreductase activity	9	10	9	19	-0.0571195	-1.06967	0.12	2.64	0	-1
Gh_A07G0541	A07	+	7350719	7359523	AT3G17770	Dihydroxyacetone kinase	O04059	DHBK_SOLLC Putative 3,4-dihydroxy-2-butanone kinase OS=Solanum lycopersicum GN=DHBK PE=2 SV=1	B9N399	B9N399_POPTR Predicted protein OS=Populus trichocarpa GN=POPTRDRAFT_784099 PE=2 SV=1	olu:OSTLU_44124	predicted protein; K00863 dihydroxyacetone kinase [EC:2.7.1.29]	PF02733.12|Dak1; PF02734.12|Dak2	IPR004006|Dak kinase; IPR004007|Dak phosphatase	GO:0006071|glycerol metabolic process ; GO:0004371|glycerone kinase activity	5	13	9	28	-1.50408	-1.63352	1.06	1.82	0	-1
Gh_A11G0850	A11	+	8598760	8601007	AT3G61610	Galactose mutarotase-like superfamily protein	Q40784	AAPC_CENCI Putative glucose-6-phosphate 1-epimerase OS=Cenchrus ciliaris PE=2 SV=1	D7UCK4	D7UCK4_VITVI Putative uncharacterized protein OS=Vitis vinifera GN=VIT_15s0046g01430 PE=4 SV=1	dme:Dmel_CG9008	CG9008 gene product from transcript CG9008-RA (EC:5.-.-.-); K01785 aldose 1-epimerase [EC:5.1.3.3]	PF01263.15|Aldose_epim	IPR008183|Aldose 1-/Glucose-6-phosphate 1-epimerase	GO:0016853|isomerase activity ; GO:0005975|carbohydrate metabolic process	5	11	16	36	-1.06635	-1.12458	0.84	1.95	0	-1
Gh_A12G2697	scaffold3405_A12	+	247233	248960	AT4G23730	Galactose mutarotase-like superfamily protein	Q40784	AAPC_CENCI Putative glucose-6-phosphate 1-epimerase OS=Cenchrus ciliaris PE=2 SV=1	B9RCN0	B9RCN0_RICCO Aldose 1-epimerase, putative OS=Ricinus communis GN=RCOM_1690740 PE=4 SV=1	dme:Dmel_CG9008	CG9008 gene product from transcript CG9008-RA (EC:5.-.-.-); K01785 aldose 1-epimerase [EC:5.1.3.3]	PF01263.15|Aldose_epim	IPR008183|Aldose 1-/Glucose-6-phosphate 1-epimerase	GO:0016853|isomerase activity ; GO:0005975|carbohydrate metabolic process	4	4	4	16	-0.0644459	-2.02439	0.03	1.4	0	-1
Gh_A02G1213	A02	-	71322411	71328407	AT4G27600	pfkB-like carbohydrate kinase family protein	Q55480	YZ37_SYNY3 Uncharacterized sugar kinase slr0537 OS=Synechocystis sp. (strain PCC 6803 / Kazusa) GN=slr0537 PE=3 SV=1	B9S254	B9S254_RICCO Ribokinase, putative OS=Ricinus communis GN=RCOM_1327470 PE=3 SV=1	mdo:100011774	hypothetical protein LOC100011774 ; K00856 adenosine kinase [EC:2.7.1.20]	PF00294.19|PfkB	IPR002139|Ribokinase; IPR002173|Carbohydrate/puine kinase, PfkB, conserved site; IPR011611|Carbohydrate kinase PfkB	GO:0016773|phosphotransferase activity, alcohol group as acceptor ; GO:0004747|ribokinase activity; GO:0006014|D-ribose metabolic process	6	5	9	20	0.274437	-1.15802	0.17	1.59	0	-1
Gh_A08G0424	A08	+	5598690	5603955	AT4G28706	pfkB-like carbohydrate kinase family protein	P50053	KHK_HUMAN Ketohexokinase OS=Homo sapiens GN=KHK PE=1 SV=1	M5VJZ6	M5VJZ6_PRUPE Uncharacterized protein OS=Prunus persica GN=PRUPE_ppa015470mg PE=4 SV=1	hsa:3795	KHK; ketohexokinase (fructokinase) (EC:2.7.1.3); K00846 ketohexokinase [EC:2.7.1.3]	PF00294.19|PfkB	IPR002139|Ribokinase; IPR002173|Carbohydrate/puine kinase, PfkB, conserved site; IPR011611|Carbohydrate kinase PfkB	GO:0016773|phosphotransferase activity, alcohol group as acceptor ; GO:0004747|ribokinase activity; GO:0006014|D-ribose metabolic process	11	14	9	22	-0.302949	-1.326	0.71	2.61	0	-1
Gh_D08G0512	D08	+	5725019	5730397	AT4G28706	pfkB-like carbohydrate kinase family protein	P50053	KHK_HUMAN Ketohexokinase OS=Homo sapiens GN=KHK PE=1 SV=1	M5VJZ6	M5VJZ6_PRUPE Uncharacterized protein OS=Prunus persica GN=PRUPE_ppa015470mg PE=4 SV=1	hsa:3795	KHK; ketohexokinase (fructokinase) (EC:2.7.1.3); K00846 ketohexokinase [EC:2.7.1.3]	PF00294.19|PfkB	IPR002139|Ribokinase; IPR002173|Carbohydrate/puine kinase, PfkB, conserved site; IPR011611|Carbohydrate kinase PfkB	GO:0016773|phosphotransferase activity, alcohol group as acceptor ; GO:0004747|ribokinase activity; GO:0006014|D-ribose metabolic process	8	9	6	14	-0.170627	-1.31372	0.21	1.75	0	-1
Gh_A05G3097	A05	+	79815960	79820126	AT5G14500	aldose 1-epimerase family protein	Q40784	AAPC_CENCI Putative glucose-6-phosphate 1-epimerase OS=Cenchrus ciliaris PE=2 SV=1	B9S658	B9S658_RICCO Aldose 1-epimerase, putative OS=Ricinus communis GN=RCOM_1064680 PE=4 SV=1	dme:Dmel_CG9008	CG9008 gene product from transcript CG9008-RA (EC:5.-.-.-); K01785 aldose 1-epimerase [EC:5.1.3.3]	PF01263.15|Aldose_epim	IPR008183|Aldose 1-/Glucose-6-phosphate 1-epimerase	GO:0016853|isomerase activity ; GO:0005975|carbohydrate metabolic process	10	13	21	44	-0.405465	-1.07944	0.43	2.15	0	-1
Gh_D04G0543	D04	-	9354886	9358946	AT5G14500	aldose 1-epimerase family protein	Q40784	AAPC_CENCI Putative glucose-6-phosphate 1-epimerase OS=Cenchrus ciliaris PE=2 SV=1	B9S658	B9S658_RICCO Aldose 1-epimerase, putative OS=Ricinus communis GN=RCOM_1064680 PE=4 SV=1	dme:Dmel_CG9008	CG9008 gene product from transcript CG9008-RA (EC:5.-.-.-); K01785 aldose 1-epimerase [EC:5.1.3.3]	PF01263.15|Aldose_epim	IPR008183|Aldose 1-/Glucose-6-phosphate 1-epimerase	GO:0016853|isomerase activity ; GO:0005975|carbohydrate metabolic process	7	11	23	47	-0.527355	-1.06452	0.6	2.55	0	-1
Gh_D04G0459	D04	-	7427800	7430013	AT5G15140	Galactose mutarotase-like superfamily protein	Q5EA79	GALM_BOVIN Aldose 1-epimerase OS=Bos taurus GN=GALM PE=2 SV=1	M5WVL2	M5WVL2_PRUPE Uncharacterized protein OS=Prunus persica GN=PRUPE_ppa024124mg PE=4 SV=1	pop:POPTR_1076165	hypothetical protein ; K01785 aldose 1-epimerase [EC:5.1.3.3]	PF01263.15|Aldose_epim	IPR008183|Aldose 1-/Glucose-6-phosphate 1-epimerase; IPR015443|Aldose 1-epimerase	GO:0016853|isomerase activity ; GO:0005975|carbohydrate metabolic process ; GO:0019318|hexose metabolic process	28	9	9	17	1.58964	-0.903441	2.09	1.16	1	0
Gh_A11G1493	A11	-	20730901	20739473	AT5G37850	pfkB-like carbohydrate kinase family protein	Q8W1X2	PDXK_ARATH Pyridoxal kinase OS=Arabidopsis thaliana GN=PK PE=1 SV=2	G7KBP8	G7KBP8_MEDTR Pyridoxal kinase OS=Medicago truncatula GN=MTR_5g079730 PE=4 SV=1	ath:AT5G37850	SOS4; SOS4 (SALT OVERLY SENSITIVE 4); kinase/ pyridoxal kinase ; K00868 pyridoxine kinase [EC:2.7.1.35]	PF08543.7|Phos_pyr_kin	IPR004625|Pyridoxal phosphate (active vitamin B6) biosynthesis, pyridoxal kinase; IPR013749|Phosphomethylpyrimidine kinase type-1	GO:0008478|pyridoxal kinase activity; GO:0009443|pyridoxal 5'-phosphate salvage	11	22	8	24	-0.925205	-1.6043	1.74	2.27	0	-1
Gh_D11G1654	D11	-	17591731	17601412	AT5G37850	pfkB-like carbohydrate kinase family protein	Q8W1X2	PDXK_ARATH Pyridoxal kinase OS=Arabidopsis thaliana GN=PK PE=1 SV=2	M0RZ76	M0RZ76_MUSAM Uncharacterized protein OS=Musa acuminata subsp. malaccensis PE=4 SV=1	pop:POPTR_756072	hypothetical protein ; K00868 pyridoxine kinase [EC:2.7.1.35]	PF08543.7|Phos_pyr_kin	IPR004625|Pyridoxal phosphate (active vitamin B6) biosynthesis, pyridoxal kinase; IPR013749|Phosphomethylpyrimidine kinase type-1	GO:0008478|pyridoxal kinase activity; GO:0009443|pyridoxal 5'-phosphate salvage	7	14	12	28	-0.959776	-1.28335	1.85	2.88	0	-1
Gh_D13G1547	D13	-	47646202	47649697	AT5G53850	haloacid dehalogenase-like hydrolase family protein	B9N1F9	MTBC_POPTR Probable bifunctional methylthioribulose-1-phosphate dehydratase/enolase-phosphatase E1 OS=Populus trichocarpa GN=POPTRDRAFT_827604 PE=3 SV=1	M5X0M5	M5X0M5_PRUPE Uncharacterized protein OS=Prunus persica GN=PRUPE_ppa004202mg PE=4 SV=1	pop:POPTR_827604	hypothetical protein ; K09880 enolase-phosphatase E1 [EC:3.1.3.77]	PF00596.16|Aldolase_II; PF13419.1|HAD_2	IPR001303|Class II aldolase/adducin N-terminal; IPR017714|Methylthioribulose-1-phosphate dehydratase; IPR023214|HAD-like domain	GO:0046872|metal ion binding ; GO:0019509|L-methionine salvage from methylthioadenosine; GO:0005737|cytoplasm	11	17	30	63	-0.589469	-1.04873	1.12	3.12	0	-1
Gh_A13G1245	A13	-	66332199	66335974	AT5G53850	haloacid dehalogenase-like hydrolase family protein	B9N1F9	MTBC_POPTR Probable bifunctional methylthioribulose-1-phosphate dehydratase/enolase-phosphatase E1 OS=Populus trichocarpa GN=POPTRDRAFT_827604 PE=3 SV=1	M5X0M5	M5X0M5_PRUPE Uncharacterized protein OS=Prunus persica GN=PRUPE_ppa004202mg PE=4 SV=1	pop:POPTR_827604	hypothetical protein ; K09880 enolase-phosphatase E1 [EC:3.1.3.77]	PF00596.16|Aldolase_II; PF13419.1|HAD_2	IPR001303|Class II aldolase/adducin N-terminal; IPR023214|HAD-like domain	GO:0046872|metal ion binding	9	10	18	37	-0.17185	-1.05365	0.41	3.45	0	-1
Gh_A10G0687	A10	-	11588126	11591847	AT5G53850	haloacid dehalogenase-like hydrolase family protein	B9N1F9	MTBC_POPTR Probable bifunctional methylthioribulose-1-phosphate dehydratase/enolase-phosphatase E1 OS=Populus trichocarpa GN=POPTRDRAFT_827604 PE=3 SV=1	E7AIM1	E7AIM1_PLAMJ Dehydratase-enolase-phophatase (Fragment) OS=Plantago major GN=dep1 PE=4 SV=1	pop:POPTR_827604	hypothetical protein ; K09880 enolase-phosphatase E1 [EC:3.1.3.77]	PF00596.16|Aldolase_II	IPR001303|Class II aldolase/adducin N-terminal; IPR017714|Methylthioribulose-1-phosphate dehydratase	GO:0046872|metal ion binding ; GO:0019509|L-methionine salvage from methylthioadenosine; GO:0005737|cytoplasm	3	12	4	38	-2.14007	-3.09637	1.19	2.28	0	-1
Gh_A05G1197	A05	-	12045837	12049661	AT5G57330	Galactose mutarotase-like superfamily protein	Q40784	AAPC_CENCI Putative glucose-6-phosphate 1-epimerase OS=Cenchrus ciliaris PE=2 SV=1	M5WSU7	M5WSU7_PRUPE Uncharacterized protein OS=Prunus persica GN=PRUPE_ppa008778mg PE=4 SV=1	dme:Dmel_CG9008	CG9008 gene product from transcript CG9008-RA (EC:5.-.-.-); K01785 aldose 1-epimerase [EC:5.1.3.3]	PF01263.15|Aldose_epim	IPR008183|Aldose 1-/Glucose-6-phosphate 1-epimerase	GO:0016853|isomerase activity ; GO:0005975|carbohydrate metabolic process	12	9	18	49	0.336394	-1.42137	1.03	4.23	0	-1
Gh_D05G1374	D05	-	12066618	12070437	AT5G57330	Galactose mutarotase-like superfamily protein	Q40784	AAPC_CENCI Putative glucose-6-phosphate 1-epimerase OS=Cenchrus ciliaris PE=2 SV=1	M5WSU7	M5WSU7_PRUPE Uncharacterized protein OS=Prunus persica GN=PRUPE_ppa008778mg PE=4 SV=1	dme:Dmel_CG9008	CG9008 gene product from transcript CG9008-RA (EC:5.-.-.-); K01785 aldose 1-epimerase [EC:5.1.3.3]	PF01263.15|Aldose_epim	IPR008183|Aldose 1-/Glucose-6-phosphate 1-epimerase	GO:0016853|isomerase activity ; GO:0005975|carbohydrate metabolic process	6	5	12	33	0.287682	-1.44036	0.27	2.76	0	-1
Gh_D06G1557	D06	+	51871079	51875740	AT5G57330	Galactose mutarotase-like superfamily protein	Q40784	AAPC_CENCI Putative glucose-6-phosphate 1-epimerase OS=Cenchrus ciliaris PE=2 SV=1	B9GLR9	B9GLR9_POPTR Predicted protein (Fragment) OS=Populus trichocarpa GN=POPTRDRAFT_178246 PE=4 SV=1	dme:Dmel_CG9008	CG9008 gene product from transcript CG9008-RA (EC:5.-.-.-); K01785 aldose 1-epimerase [EC:5.1.3.3]	PF01263.15|Aldose_epim	IPR008183|Aldose 1-/Glucose-6-phosphate 1-epimerase	GO:0016853|isomerase activity ; GO:0005975|carbohydrate metabolic process	4	5	6	14	-0.451985	-1.31058	0.67	2.51	0	-1
Gh_A04G1282	A04	+	62854902	62870040	AT1G06490	glucan synthase-like 7	Q9SHJ3	CALS7_ARATH Callose synthase 7 OS=Arabidopsis thaliana GN=CALS7 PE=2 SV=3	B9SKY2	B9SKY2_RICCO Transferase, transferring glycosyl groups, putative OS=Ricinus communis GN=RCOM_0696580 PE=4 SV=1	pop:POPTR_754371	hypothetical protein ; K00706 1,3-beta-glucan synthase [EC:2.4.1.34]	PB019860|Pfam-B_19860; PF14288.1|FKS1_dom1; PF02364.10|Glucan_synthase; PB018879|Pfam-B_18879; PB003782|Pfam-B_3782; PB016490|Pfam-B_16490; PB001748|Pfam-B_1748	IPR003440|Glycosyl transferase, family 48; IPR026899|1,3-beta-glucan synthase subunit FKS1-like, domain-1; IPR026953|Callose synthase	GO:0016020|membrane ; GO:0006075|(1->3)-beta-D-glucan biosynthetic process ; GO:0003843|1,3-beta-D-glucan synthase activity ; GO:0000148|1,3-beta-D-glucan synthase complex	3	7	6	17	-1.09861	-1.50408	1.32	2.55	-1	-1
Gh_A10G1388	A10	-	75076855	75095165	AT2G13680	callose synthase 5	Q3B724	CALS5_ARATH Callose synthase 5 OS=Arabidopsis thaliana GN=CALS5 PE=1 SV=1	D7L053	D7L053_ARALL Putative uncharacterized protein OS=Arabidopsis lyrata subsp. lyrata GN=ARALYDRAFT_899601 PE=4 SV=1	ath:AT2G13680	CALS5; CALS5 (CALLOSE SYNTHASE 5); 1,3-beta-glucan synthase ; K11000 callose synthase [EC:2.4.1.-]	PF00025.16|Arf; PB002806|Pfam-B_2806; PF14288.1|FKS1_dom1; PF02364.10|Glucan_synthase; PB018879|Pfam-B_18879; PB003782|Pfam-B_3782; PB001748|Pfam-B_1748; PB019860|Pfam-B_19860; PB016490|Pfam-B_16490	IPR003440|Glycosyl transferase, family 48; IPR006689|Small GTPase superfamily, ARF/SAR type; IPR024156|Small GTPase superfamily, ARF type; IPR026899|1,3-beta-glucan synthase subunit FKS1-like, domain-1; IPR026953|Callose synthase	GO:0016020|membrane ; GO:0006075|(1->3)-beta-D-glucan biosynthetic process ; GO:0007264|small GTPase mediated signal transduction ; GO:0003843|1,3-beta-D-glucan synthase activity ; GO:0005622|intracellular ; GO:0005525|GTP binding ; GO:0000148|1,3-beta-D-glucan synthase complex	11	34	19	81	-1.66771	-2.06721	0.75	1.5	0	-1
Gh_Sca092001G01	scaffold92001	-	191	376	AT5G13000	glucan synthase-like 12	Q9LXT9	CALS3_ARATH Callose synthase 3 OS=Arabidopsis thaliana GN=CALS3 PE=2 SV=3	M4E3N3	M4E3N3_BRARP Uncharacterized protein OS=Brassica rapa subsp. pekinensis GN=Bra023386 PE=4 SV=1	ath:AT1G05570	CALS1; CALS1 (CALLOSE SYNTHASE 1); transferase, transferring glycosyl groups ; K11000 callose synthase [EC:2.4.1.-]		IPR026953|Callose synthase	GO:0003843|1,3-beta-D-glucan synthase activity	4	1	10	22	1.5405	-1.14091	0.55	1.71	0	-1
Gh_D13G0301	D13	-	2923757	2926516	AT2G21370	xylulose kinase-1	P27155	XYLB_STAXY Xylulose kinase OS=Staphylococcus xylosus GN=xylB PE=3 SV=1	B9HRH6	B9HRH6_POPTR Predicted protein OS=Populus trichocarpa GN=POPTRDRAFT_1086712 PE=4 SV=1	tva:TVAG_135240	sugar kinase ; K00851 gluconokinase [EC:2.7.1.12]	PF00370.16|FGGY_N; PF02782.11|FGGY_C	IPR018484|Carbohydrate kinase, FGGY, N-terminal; IPR018485|Carbohydrate kinase, FGGY, C-terminal	GO:0016773|phosphotransferase activity, alcohol group as acceptor ; GO:0005975|carbohydrate metabolic process	29	36	3	9	-0.337601	-1.67392	2.14	2.32	0	-1
Gh_A01G0229	A01	+	2216586	2221182	AT3G06580	Mevalonate/galactokinase family protein	Q9SEE5	GALK1_ARATH Galactokinase OS=Arabidopsis thaliana GN=GAL1 PE=1 SV=2	B6V3B9	B6V3B9_CUCME Galactokinase OS=Cucumis melo PE=2 SV=1	pop:POPTR_723945	hypothetical protein ; K00849 galactokinase [EC:2.7.1.6]	PF00288.21|GHMP_kinases_N; PF10509.4|GalKase_gal_bdg; PF08544.8|GHMP_kinases_C	IPR000705|Galactokinase; IPR006203|GHMP kinase, ATP-binding, conserved site; IPR006204|GHMP kinase N-terminal domain; IPR006206|Mevalonate/galactokinase; IPR013750|GHMP kinase, C-terminal domain; IPR019539|Galactokinase galactose-binding domain; IPR019741|Galactokinase, conserved site	GO:0046835|carbohydrate phosphorylation; GO:0008152|metabolic process ; GO:0005524|ATP binding ; GO:0016301|kinase activity ; GO:0016773|phosphotransferase activity, alcohol group as acceptor ; GO:0006012|galactose metabolic process ; GO:0005737|cytoplasm ; GO:0004335|galactokinase activity	3	8	7	15	-1.21302	-1.21364	0.8	1.34	0	-1
Gh_A10G0227	A10	-	2004984	2009363	AT5G08370	alpha-galactosidase 2	Q42656	AGAL_COFAR Alpha-galactosidase OS=Coffea arabica PE=1 SV=1	M5WH74	M5WH74_PRUPE Uncharacterized protein OS=Prunus persica GN=PRUPE_ppa007136mg PE=4 SV=1	osa:4344290	Os07g0679300; hypothetical protein ; K07407 alpha-galactosidase [EC:3.2.1.22]	PB008970|Pfam-B_8970; PB000968|Pfam-B_968; PF02065.13|Melibiase	IPR000111|Glycoside hydrolase, clan GH-D; IPR002241|Glycoside hydrolase, family 27	GO:0004553|hydrolase activity, hydrolyzing O-glycosyl compounds ; GO:0005975|carbohydrate metabolic process	10	34	2	9	-1.711	-1.83803	1.9	0.74	-1	0
Gh_D04G1070	D04	+	35186726	35190638	AT5G17310	UDP-glucose pyrophosphorylase 2	O64459	UGPA_PYRPY UTP--glucose-1-phosphate uridylyltransferase OS=Pyrus pyrifolia PE=2 SV=1	J7LIB4	J7LIB4_ACTER UDP-glucose pyrophosphorylase (Fragment) OS=Actinidia eriantha PE=2 SV=1	sbi:SORBI_04g001320	SORBIDRAFT_04g001320; hypothetical protein ; K00963 UTP--glucose-1-phosphate uridylyltransferase [EC:2.7.7.9]	PF01704.13|UDPGP; PB008108|Pfam-B_8108	IPR002618|UTP--glucose-1-phosphate uridylyltransferase; IPR016267|UTP--glucose-1-phosphate uridylyltransferase, subgroup	GO:0008152|metabolic process ; GO:0016779|nucleotidyltransferase activity	6	3	7	25	0.780158	-1.88903	0.3	1.54	0	-1
Gh_D10G0107	D10	+	845050	849103	AT1G12000	Phosphofructokinase family protein	Q41141	PFPB_RICCO Pyrophosphate--fructose 6-phosphate 1-phosphotransferase subunit beta OS=Ricinus communis GN=PFP-BETA PE=3 SV=1	B9HZE4	B9HZE4_POPTR Predicted protein OS=Populus trichocarpa GN=POPTRDRAFT_1093153 PE=2 SV=1	ath:AT1G12000	pyrophosphate--fructose-6-phosphate 1-phosphotransferase beta subunit, putative / pyrophosphate-dependent 6-phosphofructose-1-kinase, putative ; K00895 pyrophosphate--fructose-6-phosphate 1-phosphotransferase [EC:2.7.1.90]	PF00365.15|PFK; PB005933|Pfam-B_5933	IPR000023|Phosphofructokinase domain; IPR022953|Phosphofructokinase	GO:0003872|6-phosphofructokinase activity ; GO:0006002|fructose 6-phosphate metabolic process; GO:0006096|glycolysis ; GO:0005945|6-phosphofructokinase complex	120	44	132	138	1.4503	-0.0743271	2.37	0.2	1	0
Gh_A10G0103	A10	+	834861	838764	AT1G12000	Phosphofructokinase family protein	Q41141	PFPB_RICCO Pyrophosphate--fructose 6-phosphate 1-phosphotransferase subunit beta OS=Ricinus communis GN=PFP-BETA PE=3 SV=1	B9HZE4	B9HZE4_POPTR Predicted protein OS=Populus trichocarpa GN=POPTRDRAFT_1093153 PE=2 SV=1	ath:AT1G12000	pyrophosphate--fructose-6-phosphate 1-phosphotransferase beta subunit, putative / pyrophosphate-dependent 6-phosphofructose-1-kinase, putative ; K00895 pyrophosphate--fructose-6-phosphate 1-phosphotransferase [EC:2.7.1.90]	PF00365.15|PFK; PB005933|Pfam-B_5933	IPR000023|Phosphofructokinase domain; IPR022953|Phosphofructokinase	GO:0003872|6-phosphofructokinase activity ; GO:0006002|fructose 6-phosphate metabolic process; GO:0006096|glycolysis ; GO:0005945|6-phosphofructokinase complex	93	29	118	107	1.66004	0.145662	1.58	0.24	1	0
Gh_D02G1012	D02	+	24830229	24835396	AT1G76550	Phosphofructokinase family protein	Q41140	PFPA_RICCO Pyrophosphate--fructose 6-phosphate 1-phosphotransferase subunit alpha OS=Ricinus communis GN=PFP-ALPHA PE=1 SV=1	F2YQ40	F2YQ40_9ROSA Phosphofructokinase alpha subunit OS=Eriobotrya japonica GN=PFKa PE=2 SV=2	ath:AT1G20950	pyrophosphate--fructose-6-phosphate 1-phosphotransferase-related / pyrophosphate-dependent 6-phosphofructose-1-kinase-related ; K00895 pyrophosphate--fructose-6-phosphate 1-phosphotransferase [EC:2.7.1.90]	PF00365.15|PFK	IPR000023|Phosphofructokinase domain; IPR022953|Phosphofructokinase	GO:0003872|6-phosphofructokinase activity ; GO:0006002|fructose 6-phosphate metabolic process; GO:0006096|glycolysis ; GO:0005945|6-phosphofructokinase complex	338	135	386	480	1.31943	-0.314424	2.62	1.39	1	0
Gh_A02G0878	A02	-	27983885	27988803	AT1G76550	Phosphofructokinase family protein	Q41140	PFPA_RICCO Pyrophosphate--fructose 6-phosphate 1-phosphotransferase subunit alpha OS=Ricinus communis GN=PFP-ALPHA PE=1 SV=1	F2YQ40	F2YQ40_9ROSA Phosphofructokinase alpha subunit OS=Eriobotrya japonica GN=PFKa PE=2 SV=2	ath:AT1G20950	pyrophosphate--fructose-6-phosphate 1-phosphotransferase-related / pyrophosphate-dependent 6-phosphofructose-1-kinase-related ; K00895 pyrophosphate--fructose-6-phosphate 1-phosphotransferase [EC:2.7.1.90]	PF00365.15|PFK	IPR000023|Phosphofructokinase domain; IPR022953|Phosphofructokinase	GO:0003872|6-phosphofructokinase activity ; GO:0006002|fructose 6-phosphate metabolic process; GO:0006096|glycolysis ; GO:0005945|6-phosphofructokinase complex	322	126	353	485	1.35689	-0.460243	1.91	1.28	1	0
Gh_D03G1338	D03	+	41877836	41887239	AT1G07110	fructose-2,6-bisphosphatase	Q9MB58	F26_ARATH 6-phosphofructo-2-kinase/fructose-2,6-bisphosphatase OS=Arabidopsis thaliana GN=FKFBP PE=1 SV=1	D7SJU7	D7SJU7_VITVI Putative uncharacterized protein OS=Vitis vinifera GN=VIT_06s0004g06920 PE=4 SV=1	vvi:100244966	GSVIVT00024062001; hypothetical protein LOC100244966 ; K00900 6-phosphofructo-2-kinase [EC:2.7.1.105]; K01103 fructose-2,6-bisphosphatase [EC:3.1.3.46]	PF01591.13|6PF2K; PB010096|Pfam-B_10096; PF00300.17|His_Phos_1; PF00686.14|CBM_20	IPR001345|Phosphoglycerate/bisphosphoglycerate mutase, active site; IPR002044|Carbohydrate binding module family 20; IPR003094|Fructose-2,6-bisphosphatase; IPR013078|Histidine phosphatase superfamily, clade-1; IPR013079|6-phosphofructo-2-kinase	GO:2001070|starch binding ; GO:0006003|fructose 2,6-bisphosphate metabolic process; GO:0008152|metabolic process ; GO:0005524|ATP binding ; GO:0006000|fructose metabolic process ; GO:0003824|catalytic activity ; GO:0003873|6-phosphofructo-2-kinase activity	16	23	45	96	-0.533425	-1.10136	0.77	2.9	0	-1
Gh_A07G2221	scaffold1832_A07	-	1316450	1319465	AT1G07110	fructose-2,6-bisphosphatase	Q9MB58	F26_ARATH 6-phosphofructo-2-kinase/fructose-2,6-bisphosphatase OS=Arabidopsis thaliana GN=FKFBP PE=1 SV=1	B9HND2	B9HND2_POPTR Predicted protein OS=Populus trichocarpa GN=POPTRDRAFT_821351 PE=2 SV=1	pop:POPTR_821351	hypothetical protein ; K00900 6-phosphofructo-2-kinase [EC:2.7.1.105]; K01103 fructose-2,6-bisphosphatase [EC:3.1.3.46]		IPR001345|Phosphoglycerate/bisphosphoglycerate mutase, active site; IPR003094|Fructose-2,6-bisphosphatase	GO:0006003|fructose 2,6-bisphosphate metabolic process; GO:0008152|metabolic process ; GO:0005524|ATP binding ; GO:0003824|catalytic activity	4	6	6	17	-0.385658	-1.42846	0.24	1.58	0	-1
Gh_A03G0932	A03	+	59875276	59878204	AT1G07110	fructose-2,6-bisphosphatase	Q9MB58	F26_ARATH 6-phosphofructo-2-kinase/fructose-2,6-bisphosphatase OS=Arabidopsis thaliana GN=FKFBP PE=1 SV=1	K7LQV2	K7LQV2_SOYBN Uncharacterized protein OS=Glycine max PE=4 SV=1	vvi:100244966	GSVIVT00024062001; hypothetical protein LOC100244966 ; K00900 6-phosphofructo-2-kinase [EC:2.7.1.105]; K01103 fructose-2,6-bisphosphatase [EC:3.1.3.46]	PF01591.13|6PF2K	IPR003094|Fructose-2,6-bisphosphatase; IPR013079|6-phosphofructo-2-kinase	GO:0006003|fructose 2,6-bisphosphate metabolic process; GO:0005524|ATP binding ; GO:0006000|fructose metabolic process ; GO:0003824|catalytic activity ; GO:0003873|6-phosphofructo-2-kinase activity	4	6	7	16	-0.693147	-1.09856	0.52	1.52	0	-1
Gh_A08G0003	A08	+	27062	28649	AT3G55440	triosephosphate isomerase	P48491	TPIS_ARATH Triosephosphate isomerase, cytosolic OS=Arabidopsis thaliana GN=CTIMC PE=1 SV=2	M5VZS0	M5VZS0_PRUPE Uncharacterized protein OS=Prunus persica GN=PRUPE_ppa010312mg PE=4 SV=1	vvi:100248352	GSVIVT00024314001; hypothetical protein LOC100248352 ; K01803 triosephosphate isomerase (TIM) [EC:5.3.1.1]	PF00121.13|TIM	IPR000652|Triosephosphate isomerase; IPR020861|Triosephosphate isomerase, active site	GO:0008152|metabolic process ; GO:0004807|triose-phosphate isomerase activity	8	6	10	20	0.583146	-1.0349	0.8	2.1	0	-1
Gh_D04G0765	D04	-	15770270	15772696	AT3G04120	glyceraldehyde-3-phosphate dehydrogenase C subunit 1	Q7FAH2	G3PC2_ORYSJ Glyceraldehyde-3-phosphate dehydrogenase 2, cytosolic OS=Oryza sativa subsp. japonica GN=GAPC2 PE=1 SV=1	D2D332	D2D332_GOSHI Glyceraldehyde-3-phosphate dehydrogenase C subunit OS=Gossypium hirsutum PE=2 SV=1	osa:4336216	Os04g0486600; hypothetical protein ; K00134 glyceraldehyde 3-phosphate dehydrogenase [EC:1.2.1.12]	PF02800.15|Gp_dh_C; PF00044.19|Gp_dh_N	IPR020828|Glyceraldehyde 3-phosphate dehydrogenase, NAD(P) binding domain; IPR020829|Glyceraldehyde 3-phosphate dehydrogenase, catalytic domain; IPR020830|Glyceraldehyde 3-phosphate dehydrogenase, active site; IPR020831|Glyceraldehyde/Erythrose phosphate dehydrogenase family	GO:0016620|oxidoreductase activity, acting on the aldehyde or oxo group of donors, NAD or NADP as acceptor ; GO:0055114|oxidation-reduction process	731	310	775	974	1.23626	-0.329005	1.97	0.94	1	0
Gh_A05G2976	A05	-	73258028	73260422	AT3G04120	glyceraldehyde-3-phosphate dehydrogenase C subunit 1	Q7FAH2	G3PC2_ORYSJ Glyceraldehyde-3-phosphate dehydrogenase 2, cytosolic OS=Oryza sativa subsp. japonica GN=GAPC2 PE=1 SV=1	D2D332	D2D332_GOSHI Glyceraldehyde-3-phosphate dehydrogenase C subunit OS=Gossypium hirsutum PE=2 SV=1	osa:4336216	Os04g0486600; hypothetical protein ; K00134 glyceraldehyde 3-phosphate dehydrogenase [EC:1.2.1.12]	PF02800.15|Gp_dh_C; PF00044.19|Gp_dh_N	IPR020828|Glyceraldehyde 3-phosphate dehydrogenase, NAD(P) binding domain; IPR020829|Glyceraldehyde 3-phosphate dehydrogenase, catalytic domain; IPR020830|Glyceraldehyde 3-phosphate dehydrogenase, active site; IPR020831|Glyceraldehyde/Erythrose phosphate dehydrogenase family	GO:0016620|oxidoreductase activity, acting on the aldehyde or oxo group of donors, NAD or NADP as acceptor ; GO:0055114|oxidation-reduction process	756	329	719	955	1.20215	-0.40871	1.89	1.07	1	0
Gh_D05G0533	D05	+	4326082	4328437	AT2G24270	aldehyde dehydrogenase 11A3	P93338	GAPN_NICPL NADP-dependent glyceraldehyde-3-phosphate dehydrogenase OS=Nicotiana plumbaginifolia GN=GAPN PE=2 SV=1	A9PGH7	A9PGH7_POPTR Putative uncharacterized protein OS=Populus trichocarpa PE=2 SV=1	osa:4345685	Os08g0440800; hypothetical protein ; K00131 glyceraldehyde-3-phosphate dehydrogenase (NADP) [EC:1.2.1.9]	PF00171.17|Aldedh	IPR015590|Aldehyde dehydrogenase domain; IPR016160|Aldehyde dehydrogenase, conserved site	GO:0008152|metabolic process ; GO:0055114|oxidation-reduction process ; GO:0016491|oxidoreductase activity	110	35	31	31	1.67473	-0.0106259	2.33	0.01	1	0
Gh_A05G0415	A05	+	4681423	4683777	AT2G24270	aldehyde dehydrogenase 11A3	P93338	GAPN_NICPL NADP-dependent glyceraldehyde-3-phosphate dehydrogenase OS=Nicotiana plumbaginifolia GN=GAPN PE=2 SV=1	I1MT35	I1MT35_SOYBN Uncharacterized protein OS=Glycine max PE=3 SV=1	osa:4345685	Os08g0440800; hypothetical protein ; K00131 glyceraldehyde-3-phosphate dehydrogenase (NADP) [EC:1.2.1.9]	PF00171.17|Aldedh	IPR015590|Aldehyde dehydrogenase domain; IPR016160|Aldehyde dehydrogenase, conserved site	GO:0008152|metabolic process ; GO:0055114|oxidation-reduction process ; GO:0016491|oxidoreductase activity	129	29	25	29	2.16084	-0.201572	2.62	0.17	1	0
Gh_Sca078461G01	scaffold78461	-	233	457	AT2G24270	aldehyde dehydrogenase 11A3	Q8LK61	GAPN_WHEAT NADP-dependent glyceraldehyde-3-phosphate dehydrogenase OS=Triticum aestivum GN=GAPN PE=1 SV=2	I1JGN1	I1JGN1_SOYBN Uncharacterized protein OS=Glycine max PE=3 SV=1	osa:4345685	Os08g0440800; hypothetical protein ; K00131 glyceraldehyde-3-phosphate dehydrogenase (NADP) [EC:1.2.1.9]	PF00171.17|Aldedh	IPR015590|Aldehyde dehydrogenase domain	GO:0008152|metabolic process ; GO:0055114|oxidation-reduction process ; GO:0016491|oxidoreductase activity	23	5	3	4	2.11153	-0.753772	2.81	0.63	1	0
Gh_A01G1785	A01	-	97578620	97580581	AT2G36460	Aldolase superfamily protein	P17784	ALF_ORYSJ Fructose-bisphosphate aldolase cytoplasmic isozyme OS=Oryza sativa subsp. japonica GN=FBA PE=1 SV=2	A9PJ53	A9PJ53_9ROSI Putative uncharacterized protein OS=Populus trichocarpa x Populus deltoides PE=2 SV=1	pop:POPTR_578574	hypothetical protein ; K01623 fructose-bisphosphate aldolase, class I [EC:4.1.2.13]	PF00274.14|Glycolytic	IPR000741|Fructose-bisphosphate aldolase, class-I	GO:0004332|fructose-bisphosphate aldolase activity ; GO:0006096|glycolysis	74	30	82	109	1.29375	-0.419879	1.51	0.89	1	0
Gh_A06G0769	A06	-	26891046	26896080	AT1G79550	phosphoglycerate kinase	Q42962	PGKY_TOBAC Phosphoglycerate kinase, cytosolic OS=Nicotiana tabacum PE=1 SV=1	A9PCH8	A9PCH8_POPTR Predicted protein OS=Populus trichocarpa GN=POPTRDRAFT_569934 PE=2 SV=1	pop:POPTR_569934	hypothetical protein ; K01079 phosphoserine phosphatase [EC:3.1.3.3]	PF00162.14|PGK	IPR001576|Phosphoglycerate kinase; IPR015911|Phosphoglycerate kinase, conserved site	GO:0006096|glycolysis ; GO:0004618|phosphoglycerate kinase activity	9	19	8	39	-1.14916	-2.26277	0.97	1.88	0	-1
Gh_D02G1082	D02	+	29831798	29835472	AT1G09780	Phosphoglycerate mutase, 2,3-bisphosphoglycerate-independent	P35493	PMGI_RICCO 2,3-bisphosphoglycerate-independent phosphoglycerate mutase OS=Ricinus communis PE=1 SV=2	C5DB67	C5DB67_VITVI Putative 2-3 biphosphoglycerate independant phosphoglycerate mutase OS=Vitis vinifera GN=40N03_140 PE=2 SV=1	vvi:100245007	hypothetical protein LOC100245007 ; K01834 phosphoglycerate mutase [EC:5.4.2.1]	PF06415.8|iPGM_N; PF01676.13|Metalloenzyme	IPR006124|Metalloenzyme; IPR011258|BPG-independent PGAM, N-terminal	GO:0046872|metal ion binding ; GO:0006007|glucose catabolic process ; GO:0004619|phosphoglycerate mutase activity ; GO:0003824|catalytic activity ; GO:0005737|cytoplasm ; GO:0030145|manganese ion binding	214	98	139	231	1.11974	-0.731217	2.29	1.93	1	0
Gh_A03G0649	A03	-	19450735	19453882	AT1G74030	enolase 1	Q9C9C4	ENO1_ARATH Enolase 1, chloroplastic OS=Arabidopsis thaliana GN=ENO1 PE=1 SV=1	E6NU46	E6NU46_9ROSI JHL10I11.2 protein OS=Jatropha curcas GN=JHL10I11.2 PE=3 SV=1	vvi:100256026	similar to enolase, putative ; K01689 enolase [EC:4.2.1.11]	PF00113.17|Enolase_C; PF03952.11|Enolase_N	IPR000941|Enolase; IPR020809|Enolase, conserved site; IPR020810|Enolase, C-terminal; IPR020811|Enolase, N-terminal	GO:0000287|magnesium ion binding ; GO:0004634|phosphopyruvate hydratase activity ; GO:0006096|glycolysis ; GO:0000015|phosphopyruvate hydratase complex	183	86	66	101	1.08212	-0.604104	2.87	1.57	1	0
Gh_D01G2033	D01	-	59326180	59329485	AT2G36530	Enolase	P42896	ENO_RICCO Enolase OS=Ricinus communis PE=2 SV=1	Q6WB92	Q6WB92_GOSBA Enolase OS=Gossypium barbadense PE=2 SV=1	pop:POPTR_836259	hypothetical protein ; K01689 enolase [EC:4.2.1.11]	PF00113.17|Enolase_C; PF03952.11|Enolase_N	IPR000941|Enolase; IPR020809|Enolase, conserved site; IPR020810|Enolase, C-terminal; IPR020811|Enolase, N-terminal	GO:0000287|magnesium ion binding ; GO:0004634|phosphopyruvate hydratase activity ; GO:0006096|glycolysis ; GO:0000015|phosphopyruvate hydratase complex	256	117	316	432	1.12251	-0.454373	1.31	0.98	1	0
Gh_D09G2437	scaffold4320_D09	+	5800	9222	AT2G36530	Enolase	P42896	ENO_RICCO Enolase OS=Ricinus communis PE=2 SV=1	A8IMB0	A8IMB0_GOSHI Enolase OS=Gossypium hirsutum GN=Eno PE=2 SV=1	pop:POPTR_836259	hypothetical protein ; K01689 enolase [EC:4.2.1.11]	PF00113.17|Enolase_C; PF03952.11|Enolase_N	IPR000941|Enolase; IPR020809|Enolase, conserved site; IPR020810|Enolase, C-terminal; IPR020811|Enolase, N-terminal	GO:0000287|magnesium ion binding ; GO:0004634|phosphopyruvate hydratase activity ; GO:0006096|glycolysis ; GO:0000015|phosphopyruvate hydratase complex	72	30	81	123	1.23816	-0.600943	1.74	1.59	1	0
Gh_A09G1335	A09	+	66046261	66051487	AT3G52990	Pyruvate kinase family protein	Q42806	KPYC_SOYBN Pyruvate kinase, cytosolic isozyme OS=Glycine max PE=1 SV=1	A9P7U5	A9P7U5_POPTR Pyruvate kinase OS=Populus trichocarpa GN=POPTRDRAFT_589553 PE=2 SV=1	ath:AT3G52990	pyruvate kinase, putative ; K00873 pyruvate kinase [EC:2.7.1.40]	PF00224.16|PK; PF02887.11|PK_C	IPR001697|Pyruvate kinase; IPR015793|Pyruvate kinase, barrel; IPR015795|Pyruvate kinase, C-terminal	GO:0030955|potassium ion binding ; GO:0000287|magnesium ion binding ; GO:0004743|pyruvate kinase activity ; GO:0006096|glycolysis	45	26	42	94	0.834533	-1.15648	1.1	2.08	0	-1
Gh_D09G2442	scaffold4321_D09	+	63398	68118	AT3G52990	Pyruvate kinase family protein	Q42806	KPYC_SOYBN Pyruvate kinase, cytosolic isozyme OS=Glycine max PE=1 SV=1	A9P7U5	A9P7U5_POPTR Pyruvate kinase OS=Populus trichocarpa GN=POPTRDRAFT_589553 PE=2 SV=1	ath:AT3G52990	pyruvate kinase, putative ; K00873 pyruvate kinase [EC:2.7.1.40]	PF00224.16|PK; PF02887.11|PK_C	IPR001697|Pyruvate kinase; IPR015793|Pyruvate kinase, barrel; IPR015795|Pyruvate kinase, C-terminal	GO:0030955|potassium ion binding ; GO:0000287|magnesium ion binding ; GO:0004743|pyruvate kinase activity ; GO:0006096|glycolysis	41	22	32	99	0.90807	-1.62891	0.55	1.47	0	-1
Gh_A10G1783	A10	+	92688366	92696676	AT3G52990	Pyruvate kinase family protein	Q42806	KPYC_SOYBN Pyruvate kinase, cytosolic isozyme OS=Glycine max PE=1 SV=1	F6I5U5	F6I5U5_VITVI Pyruvate kinase OS=Vitis vinifera GN=VIT_13s0074g00210 PE=2 SV=1	ath:AT3G52990	pyruvate kinase, putative ; K00873 pyruvate kinase [EC:2.7.1.40]	PF00224.16|PK; PF02887.11|PK_C	IPR001697|Pyruvate kinase; IPR015793|Pyruvate kinase, barrel; IPR015795|Pyruvate kinase, C-terminal	GO:0030955|potassium ion binding ; GO:0000287|magnesium ion binding ; GO:0004743|pyruvate kinase activity ; GO:0006096|glycolysis	11	10	17	42	0.085514	-1.29015	0.06	2.08	0	-1
Gh_A13G0547	A13	+	12682101	12685217	AT5G08570	Pyruvate kinase family protein	Q42806	KPYC_SOYBN Pyruvate kinase, cytosolic isozyme OS=Glycine max PE=1 SV=1	I1N5N0	I1N5N0_SOYBN Pyruvate kinase OS=Glycine max PE=3 SV=1	vvi:100255934	GSVIVT00002610001; hypothetical protein LOC100255934 ; K00873 pyruvate kinase [EC:2.7.1.40]	PF00224.16|PK; PF02887.11|PK_C	IPR001697|Pyruvate kinase; IPR015793|Pyruvate kinase, barrel; IPR015795|Pyruvate kinase, C-terminal; IPR018209|Pyruvate kinase, active site	GO:0030955|potassium ion binding ; GO:0000287|magnesium ion binding ; GO:0004743|pyruvate kinase activity ; GO:0006096|glycolysis	37	9	6	20	2.00533	-1.70136	2.05	1.37	1	-1
Gh_A02G0746	A02	-	13840387	13843027	AT1G53310	phosphoenolpyruvate carboxylase 1	P29196	CAPP_SOLTU Phosphoenolpyruvate carboxylase OS=Solanum tuberosum GN=PPC1 PE=2 SV=2	A9QED9	A9QED9_GOSHI Phosphoenolpyruvate carboxylase OS=Gossypium hirsutum GN=PEPC2 PE=2 SV=1	pop:POPTR_745223	hypothetical protein ; K01595 phosphoenolpyruvate carboxylase [EC:4.1.1.31]	PF00311.12|PEPcase	IPR021135|Phosphoenolpyruvate carboxylase	GO:0006099|tricarboxylic acid cycle ; GO:0015977|carbon fixation ; GO:0008964|phosphoenolpyruvate carboxylase activity	4	5	4	14	-0.526093	-1.67764	0.33	1.56	0	-1
Gh_D12G0808	D12	+	25014666	25019967	AT1G53310	phosphoenolpyruvate carboxylase 1	Q02909	CAPP1_SOYBN Phosphoenolpyruvate carboxylase, housekeeping isozyme OS=Glycine max GN=PPC16 PE=1 SV=1	O23946	O23946_GOSHI Phosphoenolpyruvate carboxylase 1 OS=Gossypium hirsutum GN=PEPC1 PE=2 SV=1	vvi:100233103	GSVIVT00018735001, GPEPC; PEP carboxylase ; K01595 phosphoenolpyruvate carboxylase [EC:4.1.1.31]	PB010230|Pfam-B_10230; PF00311.12|PEPcase	IPR018129|Phosphoenolpyruvate carboxylase, active site; IPR021135|Phosphoenolpyruvate carboxylase	GO:0006099|tricarboxylic acid cycle ; GO:0015977|carbon fixation ; GO:0008964|phosphoenolpyruvate carboxylase activity	7	5	4	9	0.464304	-1.27297	0.87	2.01	0	-1
Gh_A12G0505	A12	-	12173946	12183814	AT3G14940	phosphoenolpyruvate carboxylase 3	P29196	CAPP_SOLTU Phosphoenolpyruvate carboxylase OS=Solanum tuberosum GN=PPC1 PE=2 SV=2	G8HI81	G8HI81_CITSI Phosphoenolpyruvate carboxylase (Fragment) OS=Citrus sinensis PE=2 SV=1	pop:POPTR_745223	hypothetical protein ; K01595 phosphoenolpyruvate carboxylase [EC:4.1.1.31]	PF00311.12|PEPcase	IPR021135|Phosphoenolpyruvate carboxylase	GO:0006099|tricarboxylic acid cycle ; GO:0015977|carbon fixation ; GO:0008964|phosphoenolpyruvate carboxylase activity	6	9	10	28	-0.517943	-1.43588	0.25	1.33	0	-1
Gh_D11G2549	D11	+	52618032	52618844	AT1G08650	phosphoenolpyruvate carboxylase kinase 1	Q9SPK4	PPCK1_ARATH Phosphoenolpyruvate carboxylase kinase 1 OS=Arabidopsis thaliana GN=PPCK1 PE=1 SV=1	B9I5N1	B9I5N1_POPTR Predicted protein OS=Populus trichocarpa GN=POPTRDRAFT_773772 PE=4 SV=1	ath:AT2G38910	CPK20; CPK20 (calcium-dependent protein kinase 20); calmodulin-dependent protein kinase/ kinase ; K00924	PF00069.20|Pkinase	IPR000719|Protein kinase domain; IPR002290|Serine/threonine- / dual specificity protein kinase, catalytic domain; IPR008271|Serine/threonine-protein kinase, active site; IPR017441|Protein kinase, ATP binding site; IPR020635|Tyrosine-protein kinase, catalytic domain	GO:0004713|protein tyrosine kinase activity; GO:0005524|ATP binding ; GO:0004674|protein serine/threonine kinase activity ; GO:0004672|protein kinase activity ; GO:0006468|protein phosphorylation	39	17	27	27	1.17032	-0.0043573	1.53	0	1	0
Gh_D09G1835	D09	-	45937215	45939002	AT1G12580	phosphoenolpyruvate carboxylase-related kinase 1	Q9FMP5	CDPKH_ARATH Calcium-dependent protein kinase 17 OS=Arabidopsis thaliana GN=CPK17 PE=2 SV=1	D7TW81	D7TW81_VITVI Putative uncharacterized protein OS=Vitis vinifera GN=VIT_02s0025g04520 PE=4 SV=1	ath:AT5G12180	CPK17; CPK17 (calcium-dependent protein kinase 17); calmodulin-dependent protein kinase/ kinase ; K00924	PF00069.20|Pkinase	IPR000719|Protein kinase domain; IPR002290|Serine/threonine- / dual specificity protein kinase, catalytic domain; IPR008271|Serine/threonine-protein kinase, active site; IPR017441|Protein kinase, ATP binding site; IPR020635|Tyrosine-protein kinase, catalytic domain	GO:0004713|protein tyrosine kinase activity; GO:0005524|ATP binding ; GO:0004674|protein serine/threonine kinase activity ; GO:0004672|protein kinase activity ; GO:0006468|protein phosphorylation	7	6	4	9	0.169899	-1.11923	0.32	2.02	0	-1
Gh_A01G0785	A01	-	16916976	16921595	AT1G16300	glyceraldehyde-3-phosphate dehydrogenase of plastid 2	Q5E924	G3PP2_ARATH Glyceraldehyde 3-phosphate dehydrogenase GAPCP2, chloroplastic OS=Arabidopsis thaliana GN=GAPCP2 PE=2 SV=1	B9HI47	B9HI47_POPTR Predicted protein OS=Populus trichocarpa GN=POPTRDRAFT_832627 PE=3 SV=1	pop:POPTR_832627	hypothetical protein ; K00134 glyceraldehyde 3-phosphate dehydrogenase [EC:1.2.1.12]	PF02800.15|Gp_dh_C; PF00044.19|Gp_dh_N	IPR020828|Glyceraldehyde 3-phosphate dehydrogenase, NAD(P) binding domain; IPR020829|Glyceraldehyde 3-phosphate dehydrogenase, catalytic domain; IPR020830|Glyceraldehyde 3-phosphate dehydrogenase, active site; IPR020831|Glyceraldehyde/Erythrose phosphate dehydrogenase family	GO:0016620|oxidoreductase activity, acting on the aldehyde or oxo group of donors, NAD or NADP as acceptor ; GO:0055114|oxidation-reduction process	91	38	58	95	1.26958	-0.712156	1.67	1.22	1	0
Gh_D11G2927	D11	-	59768649	59772906	AT1G16300	glyceraldehyde-3-phosphate dehydrogenase of plastid 2	Q5E924	G3PP2_ARATH Glyceraldehyde 3-phosphate dehydrogenase GAPCP2, chloroplastic OS=Arabidopsis thaliana GN=GAPCP2 PE=2 SV=1	B9HI47	B9HI47_POPTR Predicted protein OS=Populus trichocarpa GN=POPTRDRAFT_832627 PE=3 SV=1	pop:POPTR_832627	hypothetical protein ; K00134 glyceraldehyde 3-phosphate dehydrogenase [EC:1.2.1.12]	PF02800.15|Gp_dh_C; PF00044.19|Gp_dh_N	IPR020828|Glyceraldehyde 3-phosphate dehydrogenase, NAD(P) binding domain; IPR020829|Glyceraldehyde 3-phosphate dehydrogenase, catalytic domain; IPR020830|Glyceraldehyde 3-phosphate dehydrogenase, active site; IPR020831|Glyceraldehyde/Erythrose phosphate dehydrogenase family	GO:0016620|oxidoreductase activity, acting on the aldehyde or oxo group of donors, NAD or NADP as acceptor ; GO:0055114|oxidation-reduction process	62	29	77	89	1.09732	-0.223144	1.46	0.48	1	0
Gh_D06G0340	D06	-	4395180	4397521	AT1G22170	Phosphoglycerate mutase family protein	Q6MEW4	GPMA_PARUW 2,3-bisphosphoglycerate-dependent phosphoglycerate mutase OS=Protochlamydia amoebophila (strain UWE25) GN=gpmA PE=3 SV=1	B9RJG7	B9RJG7_RICCO Phosphoglycerate mutase, putative OS=Ricinus communis GN=RCOM_1034140 PE=3 SV=1	pop:POPTR_1071686	hypothetical protein ; K01834 phosphoglycerate mutase [EC:5.4.2.1]	PF00300.17|His_Phos_1	IPR001345|Phosphoglycerate/bisphosphoglycerate mutase, active site; IPR005952|Phosphoglycerate mutase 1; IPR013078|Histidine phosphatase superfamily, clade-1	GO:0008152|metabolic process ; GO:0004619|phosphoglycerate mutase activity ; GO:0006096|glycolysis ; GO:0003824|catalytic activity ; GO:0016868|intramolecular transferase activity, phosphotransferases	22	10	12	13	1.12845	-0.145954	1.69	0.17	1	0
Gh_A06G0310	A06	-	4244054	4246395	AT1G22170	Phosphoglycerate mutase family protein	Q6MEW4	GPMA_PARUW 2,3-bisphosphoglycerate-dependent phosphoglycerate mutase OS=Protochlamydia amoebophila (strain UWE25) GN=gpmA PE=3 SV=1	B9RJG7	B9RJG7_RICCO Phosphoglycerate mutase, putative OS=Ricinus communis GN=RCOM_1034140 PE=3 SV=1	pop:POPTR_1071686	hypothetical protein ; K01834 phosphoglycerate mutase [EC:5.4.2.1]	PF00300.17|His_Phos_1	IPR001345|Phosphoglycerate/bisphosphoglycerate mutase, active site; IPR005952|Phosphoglycerate mutase 1; IPR013078|Histidine phosphatase superfamily, clade-1	GO:0008152|metabolic process ; GO:0004619|phosphoglycerate mutase activity ; GO:0006096|glycolysis ; GO:0003824|catalytic activity ; GO:0016868|intramolecular transferase activity, phosphotransferases	18	8	8	9	1.09064	-0.04652	1.99	0.06	1	0
Gh_A04G0547	A04	-	33518907	33520785	AT3G52930	Aldolase superfamily protein	O65735	ALF_CICAR Fructose-bisphosphate aldolase, cytoplasmic isozyme OS=Cicer arietinum GN=ALDC PE=1 SV=1	A9PJ53	A9PJ53_9ROSI Putative uncharacterized protein OS=Populus trichocarpa x Populus deltoides PE=2 SV=1	pop:POPTR_578574	hypothetical protein ; K01623 fructose-bisphosphate aldolase, class I [EC:4.1.2.13]	PF00274.14|Glycolytic	IPR000741|Fructose-bisphosphate aldolase, class-I	GO:0004332|fructose-bisphosphate aldolase activity ; GO:0006096|glycolysis	221	85	250	335	1.38011	-0.420081	1.35	0.76	1	0
Gh_A02G0682	A02	-	11429152	11431422	AT1G77120	alcohol dehydrogenase 1	P06525	ADH1_ARATH Alcohol dehydrogenase class-P OS=Arabidopsis thaliana GN=ADH1 PE=1 SV=2	Q39783	Q39783_GOSHI Alcohol dehydrogenase 2b OS=Gossypium hirsutum PE=3 SV=1	ath:AT1G77120	ADH1; ADH1 (ALCOHOL DEHYDROGENASE 1) ; K00001 alcohol dehydrogenase [EC:1.1.1.1]	PF00107.21|ADH_zinc_N; PF08240.7|ADH_N; PB004256|Pfam-B_4256	IPR002085|Alcohol dehydrogenase superfamily, zinc-type; IPR002328|Alcohol dehydrogenase, zinc-type, conserved site; IPR013149|Alcohol dehydrogenase, C-terminal; IPR013154|Alcohol dehydrogenase GroES-like	GO:0008270|zinc ion binding ; GO:0055114|oxidation-reduction process ; GO:0016491|oxidoreductase activity	3	4	9	19	-0.310155	-1.0771	0.16	1.63	0	-1
Gh_A07G2011	A07	+	76376925	76380509	AT1G23800	aldehyde dehydrogenase 2B7	Q9SU63	AL2B4_ARATH Aldehyde dehydrogenase family 2 member B4, mitochondrial OS=Arabidopsis thaliana GN=ALDH2B4 PE=2 SV=1	D7TWS2	D7TWS2_VITVI Putative uncharacterized protein OS=Vitis vinifera GN=VIT_14s0066g01550 PE=3 SV=1	ath:AT3G48000	ALDH2B4 (ALDEHYDE DEHYDROGENASE 2); 3-chloroallyl aldehyde dehydrogenase/ aldehyde dehydrogenase (NAD) ; K00128 aldehyde dehydrogenase (NAD+) [EC:1.2.1.3]	PF00171.17|Aldedh	IPR015590|Aldehyde dehydrogenase domain; IPR016160|Aldehyde dehydrogenase, conserved site	GO:0008152|metabolic process ; GO:0055114|oxidation-reduction process ; GO:0016491|oxidoreductase activity	7	6	68	161	0.101781	-1.24752	0.02	2.23	0	-1
Gh_D05G0221	D05	-	2045263	2049124	AT3G24503	aldehyde dehydrogenase 2C4	Q56YU0	AL2C4_ARATH Aldehyde dehydrogenase family 2 member C4 OS=Arabidopsis thaliana GN=ALDH2C4 PE=1 SV=2	B9RKT6	B9RKT6_RICCO Aldehyde dehydrogenase, putative OS=Ricinus communis GN=RCOM_1053330 PE=3 SV=1	pop:POPTR_809215	hypothetical protein ; K12355 coniferyl-aldehyde dehydrogenase [EC:1.2.1.68]	PF00171.17|Aldedh	IPR015590|Aldehyde dehydrogenase domain	GO:0008152|metabolic process ; GO:0055114|oxidation-reduction process ; GO:0016491|oxidoreductase activity	1	3	8	19	-1.50408	-1.26695	0.33	1.36	0	-1
Gh_D02G1665	D02	-	57172439	57176663	AT3G48000	aldehyde dehydrogenase 2B4	Q9SU63	AL2B4_ARATH Aldehyde dehydrogenase family 2 member B4, mitochondrial OS=Arabidopsis thaliana GN=ALDH2B4 PE=2 SV=1	M5XAM9	M5XAM9_PRUPE Uncharacterized protein OS=Prunus persica GN=PRUPE_ppa004036mg PE=4 SV=1	ath:AT3G48000	ALDH2B4 (ALDEHYDE DEHYDROGENASE 2); 3-chloroallyl aldehyde dehydrogenase/ aldehyde dehydrogenase (NAD) ; K00128 aldehyde dehydrogenase (NAD+) [EC:1.2.1.3]	PF00171.17|Aldedh	IPR015590|Aldehyde dehydrogenase domain; IPR016160|Aldehyde dehydrogenase, conserved site	GO:0008152|metabolic process ; GO:0055114|oxidation-reduction process ; GO:0016491|oxidoreductase activity	18	13	8	23	0.448688	-1.51515	1.6	3.16	0	-1
Gh_A02G0517	A02	-	7668368	7749288	AT3G16910	acyl-activating enzyme 7	Q8VZF1	AEE7_ARATH Acetate/butyrate--CoA ligase AAE7, peroxisomal OS=Arabidopsis thaliana GN=AAE7 PE=1 SV=1	M4IS88	M4IS88_HUMLU CCL3 OS=Humulus lupulus PE=2 SV=1	mbr:MONBRDRAFT_30730	hypothetical protein ; K00666 fatty-acyl-CoA synthase [EC:6.2.1.-]	PF13193.1|AMP-binding_C; PF00501.23|AMP-binding	IPR000873|AMP-dependent synthetase/ligase; IPR025110|AMP-binding enzyme C-terminal domain	GO:0008152|metabolic process ; GO:0003824|catalytic activity	24	36	33	68	-0.609878	-1.04164	1.66	2.96	0	-1
Gh_A03G0958	A03	+	61864637	61867965	AT3G21720	isocitrate lyase	P17069	ACEA_GOSHI Isocitrate lyase OS=Gossypium hirsutum PE=2 SV=1	F6HIK1	F6HIK1_VITVI Isocitrate lyase OS=Vitis vinifera GN=VIT_12s0059g02350 PE=3 SV=1	vvi:100248231	similar to Isocitrate lyase ; K01637 isocitrate lyase [EC:4.1.3.1]	PF00463.16|ICL	IPR000918|Isocitrate lyase/phosphorylmutase; IPR006254|Isocitrate lyase; IPR018523|Isocitrate lyase/phosphorylmutase, conserved site	GO:0019752|carboxylic acid metabolic process ; GO:0008152|metabolic process ; GO:0003824|catalytic activity ; GO:0004451|isocitrate lyase activity	1	1	4	31	0.405465	-2.98818	0.12	2.85	0	-1
Gh_A03G1316	A03	+	91073236	91076739	AT5G13110	glucose-6-phosphate dehydrogenase 2	Q9FY99	G6PD2_ARATH Glucose-6-phosphate 1-dehydrogenase 2, chloroplastic OS=Arabidopsis thaliana GN=At5g13110 PE=2 SV=2	D7U5Y0	D7U5Y0_VITVI Glucose-6-phosphate 1-dehydrogenase OS=Vitis vinifera GN=VIT_01s0146g00060 PE=3 SV=1	vvi:100267681	hypothetical protein LOC100267681 ; K00036 glucose-6-phosphate 1-dehydrogenase [EC:1.1.1.49]	PF00479.17|G6PD_N; PF02781.11|G6PD_C	IPR001282|Glucose-6-phosphate dehydrogenase; IPR019796|Glucose-6-phosphate dehydrogenase, active site; IPR022674|Glucose-6-phosphate dehydrogenase, NAD-binding; IPR022675|Glucose-6-phosphate dehydrogenase, C-terminal	GO:0050661|NADP binding ; GO:0006006|glucose metabolic process ; GO:0055114|oxidation-reduction process ; GO:0004345|glucose-6-phosphate dehydrogenase activity	13	16	32	79	-0.257828	-1.31442	0.22	2.48	0	-1
Gh_A01G0161	A01	-	1629121	1633491	AT5G13110	glucose-6-phosphate dehydrogenase 2	Q43793	G6PDC_TOBAC Glucose-6-phosphate 1-dehydrogenase, chloroplastic OS=Nicotiana tabacum PE=2 SV=1	B9RMA8	B9RMA8_RICCO Glucose-6-phosphate 1-dehydrogenase OS=Ricinus communis GN=RCOM_1078990 PE=3 SV=1	vvi:100267681	hypothetical protein LOC100267681 ; K00036 glucose-6-phosphate 1-dehydrogenase [EC:1.1.1.49]	PF00479.17|G6PD_N; PF02781.11|G6PD_C	IPR001282|Glucose-6-phosphate dehydrogenase; IPR019796|Glucose-6-phosphate dehydrogenase, active site; IPR022674|Glucose-6-phosphate dehydrogenase, NAD-binding; IPR022675|Glucose-6-phosphate dehydrogenase, C-terminal	GO:0050661|NADP binding ; GO:0006006|glucose metabolic process ; GO:0055114|oxidation-reduction process ; GO:0004345|glucose-6-phosphate dehydrogenase activity	22	17	14	41	0.384967	-1.54282	0.65	2.42	0	-1
Gh_D01G0208	D01	-	1765891	1770251	AT5G13110	glucose-6-phosphate dehydrogenase 2	Q43793	G6PDC_TOBAC Glucose-6-phosphate 1-dehydrogenase, chloroplastic OS=Nicotiana tabacum PE=2 SV=1	B9RMA8	B9RMA8_RICCO Glucose-6-phosphate 1-dehydrogenase OS=Ricinus communis GN=RCOM_1078990 PE=3 SV=1	vvi:100267681	hypothetical protein LOC100267681 ; K00036 glucose-6-phosphate 1-dehydrogenase [EC:1.1.1.49]	PF00479.17|G6PD_N; PF02781.11|G6PD_C	IPR001282|Glucose-6-phosphate dehydrogenase; IPR019796|Glucose-6-phosphate dehydrogenase, active site; IPR022674|Glucose-6-phosphate dehydrogenase, NAD-binding; IPR022675|Glucose-6-phosphate dehydrogenase, C-terminal	GO:0050661|NADP binding ; GO:0006006|glucose metabolic process ; GO:0055114|oxidation-reduction process ; GO:0004345|glucose-6-phosphate dehydrogenase activity	16	11	15	33	0.606136	-1.13206	1.57	3.03	0	-1
Gh_A07G2079	A07	+	77321711	77325697	AT5G40760	glucose-6-phosphate dehydrogenase 6	P37830	G6PD_SOLTU Glucose-6-phosphate 1-dehydrogenase, cytoplasmic isoform OS=Solanum tuberosum GN=G6PDH PE=2 SV=1	R4I3D6	R4I3D6_9ROSI Cytoplasmic glucose-6-phosphate dehydrogenase OS=Cucumis hystrix PE=4 SV=1	vvi:100254253	GSVIVT00020574001; hypothetical protein LOC100254253 ; K00036 glucose-6-phosphate 1-dehydrogenase [EC:1.1.1.49]	PF00479.17|G6PD_N; PF02781.11|G6PD_C	IPR001282|Glucose-6-phosphate dehydrogenase; IPR019796|Glucose-6-phosphate dehydrogenase, active site; IPR022674|Glucose-6-phosphate dehydrogenase, NAD-binding; IPR022675|Glucose-6-phosphate dehydrogenase, C-terminal	GO:0050661|NADP binding ; GO:0006006|glucose metabolic process ; GO:0055114|oxidation-reduction process ; GO:0004345|glucose-6-phosphate dehydrogenase activity	169	54	171	194	1.64823	-0.188431	1.82	0.36	1	0
Gh_D07G2294	D07	+	54230429	54234467	AT5G40760	glucose-6-phosphate dehydrogenase 6	P37830	G6PD_SOLTU Glucose-6-phosphate 1-dehydrogenase, cytoplasmic isoform OS=Solanum tuberosum GN=G6PDH PE=2 SV=1	R4I3D6	R4I3D6_9ROSI Cytoplasmic glucose-6-phosphate dehydrogenase OS=Cucumis hystrix PE=4 SV=1	vvi:100254253	GSVIVT00020574001; hypothetical protein LOC100254253 ; K00036 glucose-6-phosphate 1-dehydrogenase [EC:1.1.1.49]	PF00479.17|G6PD_N; PF02781.11|G6PD_C	IPR001282|Glucose-6-phosphate dehydrogenase; IPR019796|Glucose-6-phosphate dehydrogenase, active site; IPR022674|Glucose-6-phosphate dehydrogenase, NAD-binding; IPR022675|Glucose-6-phosphate dehydrogenase, C-terminal	GO:0050661|NADP binding ; GO:0006006|glucose metabolic process ; GO:0055114|oxidation-reduction process ; GO:0004345|glucose-6-phosphate dehydrogenase activity	148	49	167	156	1.59008	0.102604	2.31	0.26	1	0
Gh_D09G0331	D09	+	11291340	11294584	AT5G40760	glucose-6-phosphate dehydrogenase 6	P37830	G6PD_SOLTU Glucose-6-phosphate 1-dehydrogenase, cytoplasmic isoform OS=Solanum tuberosum GN=G6PDH PE=2 SV=1	R4I3D6	R4I3D6_9ROSI Cytoplasmic glucose-6-phosphate dehydrogenase OS=Cucumis hystrix PE=4 SV=1	vvi:100254253	GSVIVT00020574001; hypothetical protein LOC100254253 ; K00036 glucose-6-phosphate 1-dehydrogenase [EC:1.1.1.49]	PF00479.17|G6PD_N; PF02781.11|G6PD_C	IPR001282|Glucose-6-phosphate dehydrogenase; IPR019796|Glucose-6-phosphate dehydrogenase, active site; IPR022674|Glucose-6-phosphate dehydrogenase, NAD-binding; IPR022675|Glucose-6-phosphate dehydrogenase, C-terminal	GO:0050661|NADP binding ; GO:0006006|glucose metabolic process ; GO:0055114|oxidation-reduction process ; GO:0004345|glucose-6-phosphate dehydrogenase activity	84	40	112	124	1.05816	-0.137102	2.78	0.8	1	0
Gh_D13G0343	D13	+	3485356	3485943	AT1G71180	6-phosphogluconate dehydrogenase family protein	Q949M8	3HID3_ARATH Probable 3-hydroxyisobutyrate dehydrogenase-like 3, mitochondrial OS=Arabidopsis thaliana GN=At1g71180 PE=2 SV=1	F6H8X5	F6H8X5_VITVI Putative uncharacterized protein OS=Vitis vinifera GN=VIT_12s0034g01860 PE=4 SV=1	ath:AT4G29120	6-phosphogluconate dehydrogenase NAD-binding domain-containing protein ; K00020 3-hydroxyisobutyrate dehydrogenase [EC:1.1.1.31]	PF03446.10|NAD_binding_2	IPR006115|6-phosphogluconate dehydrogenase, NADP-binding; IPR015815|Hydroxy monocarboxylic acid anion dehydrogenase, HIBADH-type	GO:0006098|pentose-phosphate shunt ; GO:0004616|phosphogluconate dehydrogenase (decarboxylating) activity ; GO:0055114|oxidation-reduction process ; GO:0016491|oxidoreductase activity	21	9	17	18	1.16443	-0.110347	1.57	0.16	1	0
Gh_D08G0560	D08	+	6554948	6556405	AT3G02360	6-phosphogluconate dehydrogenase family protein	Q9FWA3	6GPD3_ARATH 6-phosphogluconate dehydrogenase, decarboxylating 3 OS=Arabidopsis thaliana GN=At3g02360 PE=2 SV=1	B9SXT4	B9SXT4_RICCO 6-phosphogluconate dehydrogenase, decarboxylating OS=Ricinus communis GN=RCOM_0876630 PE=3 SV=1	pop:POPTR_837012	hypothetical protein ; K00033 6-phosphogluconate dehydrogenase [EC:1.1.1.44]	PF00393.14|6PGD; PF03446.10|NAD_binding_2	IPR006114|6-phosphogluconate dehydrogenase, C-terminal; IPR006115|6-phosphogluconate dehydrogenase, NADP-binding	GO:0050661|NADP binding ; GO:0006098|pentose-phosphate shunt ; GO:0004616|phosphogluconate dehydrogenase (decarboxylating) activity ; GO:0055114|oxidation-reduction process	336	146	312	363	1.20522	-0.21857	1.53	0.37	1	0
Gh_A06G0585	A06	+	15237010	15238032	AT4G29120	6-phosphogluconate dehydrogenase family protein	Q9SZE1	3HID1_ARATH Probable 3-hydroxyisobutyrate dehydrogenase-like 1, mitochondrial OS=Arabidopsis thaliana GN=At4g29120 PE=2 SV=1	B9ILU7	B9ILU7_POPTR Predicted protein (Fragment) OS=Populus trichocarpa GN=POPTRDRAFT_262082 PE=4 SV=1	ath:AT4G29120	6-phosphogluconate dehydrogenase NAD-binding domain-containing protein ; K00020 3-hydroxyisobutyrate dehydrogenase [EC:1.1.1.31]	PF14833.1|NAD_binding_11; PF03446.10|NAD_binding_2	IPR006115|6-phosphogluconate dehydrogenase, NADP-binding; IPR015815|Hydroxy monocarboxylic acid anion dehydrogenase, HIBADH-type	GO:0006098|pentose-phosphate shunt ; GO:0004616|phosphogluconate dehydrogenase (decarboxylating) activity ; GO:0055114|oxidation-reduction process ; GO:0016491|oxidoreductase activity	61	18	81	75	1.78126	0.113046	2.41	0.35	1	0
Gh_A06G0584	A06	+	15232112	15233134	AT4G29120	6-phosphogluconate dehydrogenase family protein	Q9SZE1	3HID1_ARATH Probable 3-hydroxyisobutyrate dehydrogenase-like 1, mitochondrial OS=Arabidopsis thaliana GN=At4g29120 PE=2 SV=1	B9ILU7	B9ILU7_POPTR Predicted protein (Fragment) OS=Populus trichocarpa GN=POPTRDRAFT_262082 PE=4 SV=1	ath:AT4G29120	6-phosphogluconate dehydrogenase NAD-binding domain-containing protein ; K00020 3-hydroxyisobutyrate dehydrogenase [EC:1.1.1.31]	PF14833.1|NAD_binding_11; PF03446.10|NAD_binding_2	IPR006115|6-phosphogluconate dehydrogenase, NADP-binding; IPR015815|Hydroxy monocarboxylic acid anion dehydrogenase, HIBADH-type	GO:0006098|pentose-phosphate shunt ; GO:0004616|phosphogluconate dehydrogenase (decarboxylating) activity ; GO:0055114|oxidation-reduction process ; GO:0016491|oxidoreductase activity	45	16	65	69	1.48744	-0.0789273	1.73	0.17	1	0
Gh_A06G0586	A06	+	15238165	15239019	AT4G29120	6-phosphogluconate dehydrogenase family protein	Q9SZE1	3HID1_ARATH Probable 3-hydroxyisobutyrate dehydrogenase-like 1, mitochondrial OS=Arabidopsis thaliana GN=At4g29120 PE=2 SV=1	B9ILU7	B9ILU7_POPTR Predicted protein (Fragment) OS=Populus trichocarpa GN=POPTRDRAFT_262082 PE=4 SV=1	ath:AT4G29120	6-phosphogluconate dehydrogenase NAD-binding domain-containing protein ; K00020 3-hydroxyisobutyrate dehydrogenase [EC:1.1.1.31]	PF14833.1|NAD_binding_11; PF03446.10|NAD_binding_2	IPR006115|6-phosphogluconate dehydrogenase, NADP-binding; IPR015815|Hydroxy monocarboxylic acid anion dehydrogenase, HIBADH-type	GO:0006098|pentose-phosphate shunt ; GO:0004616|phosphogluconate dehydrogenase (decarboxylating) activity ; GO:0055114|oxidation-reduction process ; GO:0016491|oxidoreductase activity	44	12	62	41	1.92048	0.588822	1.93	1.35	1	0
Gh_A03G1984	scaffold498_A03	+	26493	29321	AT1G12230	Aldolase superfamily protein	B0UV30	TAL_HAES2 Transaldolase OS=Haemophilus somnus (strain 2336) GN=tal PE=3 SV=1	D6N3G8	D6N3G8_GOSHI Transaldolase OS=Gossypium hirsutum PE=2 SV=1	vvi:100257422	similar to transaldolase ToTAL2 ; K00616 transaldolase [EC:2.2.1.2]	PF00923.14|Transaldolase	IPR001585|Transaldolase	GO:0005975|carbohydrate metabolic process	18	30	28	80	-0.730052	-1.51544	0.96	2.51	0	-1
Gh_A04G0871	A04	+	56303406	56305849	AT5G13420	Aldolase-type TIM barrel family protein	A0LTY8	TAL_ACIC1 Transaldolase OS=Acidothermus cellulolyticus (strain ATCC 43068 / 11B) GN=tal PE=3 SV=1	B9GMU5	B9GMU5_POPTR Predicted protein OS=Populus trichocarpa GN=POPTRDRAFT_640120 PE=3 SV=1	pop:POPTR_640120	hypothetical protein ; K00616 transaldolase [EC:2.2.1.2]	PF00923.14|Transaldolase	IPR001585|Transaldolase; IPR018225|Transaldolase, active site	GO:0005975|carbohydrate metabolic process	332	108	269	409	1.61822	-0.603915	1.84	1.23	1	0
Gh_D04G1372	D04	+	44595207	44597632	AT5G13420	Aldolase-type TIM barrel family protein	A0LTY8	TAL_ACIC1 Transaldolase OS=Acidothermus cellulolyticus (strain ATCC 43068 / 11B) GN=tal PE=3 SV=1	B9GMU5	B9GMU5_POPTR Predicted protein OS=Populus trichocarpa GN=POPTRDRAFT_640120 PE=3 SV=1	pop:POPTR_640120	hypothetical protein ; K00616 transaldolase [EC:2.2.1.2]	PF00923.14|Transaldolase	IPR001585|Transaldolase; IPR018225|Transaldolase, active site	GO:0005975|carbohydrate metabolic process	263	91	286	402	1.52348	-0.490993	2.46	1.77	1	0
Gh_A12G1299	A12	-	68606643	68612817	AT5G50850	Transketolase family protein	Q6Z1G7	ODPB1_ORYSJ Pyruvate dehydrogenase E1 component subunit beta-1, mitochondrial OS=Oryza sativa subsp. japonica GN=Os08g0536000 PE=2 SV=1	B9RFW4	B9RFW4_RICCO Pyruvate dehydrogenase, putative OS=Ricinus communis GN=RCOM_1437610 PE=4 SV=1	vvi:100264409	hypothetical protein LOC100264409 ; K00162 pyruvate dehydrogenase E1 component subunit beta [EC:1.2.4.1]	PF02780.15|Transketolase_C; PF02779.19|Transket_pyr	IPR005475|Transketolase-like, pyrimidine-binding domain; IPR005476|Transketolase, C-terminal; IPR027110|Pyruvate dehydrogenase E1 component subunit beta	GO:0008152|metabolic process ; GO:0004739|pyruvate dehydrogenase (acetyl-transferring) activity; GO:0003824|catalytic activity ; GO:0006086|acetyl-CoA biosynthetic process from pyruvate	7	15	16	48	-0.970358	-1.57963	0.86	2.3	0	-1
Gh_D12G1421	D12	-	43594130	43600055	AT5G50850	Transketolase family protein	Q6Z1G7	ODPB1_ORYSJ Pyruvate dehydrogenase E1 component subunit beta-1, mitochondrial OS=Oryza sativa subsp. japonica GN=Os08g0536000 PE=2 SV=1	B9RFW4	B9RFW4_RICCO Pyruvate dehydrogenase, putative OS=Ricinus communis GN=RCOM_1437610 PE=4 SV=1	vvi:100264409	hypothetical protein LOC100264409 ; K00162 pyruvate dehydrogenase E1 component subunit beta [EC:1.2.4.1]	PF02780.15|Transketolase_C; PF02779.19|Transket_pyr	IPR005475|Transketolase-like, pyrimidine-binding domain; IPR005476|Transketolase, C-terminal; IPR027110|Pyruvate dehydrogenase E1 component subunit beta	GO:0008152|metabolic process ; GO:0004739|pyruvate dehydrogenase (acetyl-transferring) activity; GO:0003824|catalytic activity ; GO:0006086|acetyl-CoA biosynthetic process from pyruvate	5	19	12	53	-1.83621	-2.19561	1.64	2.83	-1	-1
Gh_D06G2064	D06	+	62500956	62507202	AT3G13930	Dihydrolipoamide acetyltransferase, long form protein	Q8RWN9	ODP22_ARATH Dihydrolipoyllysine-residue acetyltransferase component 2 of pyruvate dehydrogenase complex, mitochondrial OS=Arabidopsis thaliana GN=At3g13930 PE=1 SV=2	A9PGQ6	A9PGQ6_POPTR Putative uncharacterized protein OS=Populus trichocarpa PE=2 SV=1	vvi:100251405	hypothetical protein LOC100251405 ; K00627 pyruvate dehydrogenase E2 component (dihydrolipoamide acetyltransferase) [EC:2.3.1.12]	PF00364.17|Biotin_lipoyl; PF02817.12|E3_binding; PF00198.18|2-oxoacid_dh	IPR000089|Biotin/lipoyl attachment; IPR001078|2-oxoacid dehydrogenase acyltransferase, catalytic domain; IPR003016|2-oxo acid dehydrogenase, lipoyl-binding site; IPR004167|E3 binding	GO:0016746|transferase activity, transferring acyl groups ; GO:0008152|metabolic process	37	18	62	87	1.00608	-0.486405	2.2	2.31	1	0
Gh_D05G3734	scaffold3992_D05	-	3291	9699	AT2G05710	aconitase 3	P49608	ACOC_CUCMA Aconitate hydratase, cytoplasmic OS=Cucurbita maxima PE=2 SV=1	B9SDW5	B9SDW5_RICCO Aconitase, putative OS=Ricinus communis GN=RCOM_0487910 PE=4 SV=1	vvi:100253811	GSVIVT00027318001; hypothetical protein LOC100253811 ; K01681 aconitate hydratase 1 [EC:4.2.1.3]	PB012921|Pfam-B_12921; PF00330.15|Aconitase; PB004717|Pfam-B_4717; PF00694.14|Aconitase_C; PB002084|Pfam-B_2084; PB003732|Pfam-B_3732	IPR000573|Aconitase A/isopropylmalate dehydratase small subunit, swivel; IPR001030|Aconitase/3-isopropylmalate dehydratase large subunit, alpha/beta/alpha; IPR015934|Aconitase/Iron regulatory protein 2/2-methylisocitrate dehydratase; IPR015937|Aconitase/isopropylmalate dehydratase; IPR018136|Aconitase family, 4Fe-4S cluster binding site	GO:0008152|metabolic process	24	17	23	48	0.527633	-1.0875	0.97	2.34	0	-1
Gh_A02G1668	A02	+	83024936	83030802	AT4G35830	aconitase 1	P49608	ACOC_CUCMA Aconitate hydratase, cytoplasmic OS=Cucurbita maxima PE=2 SV=1	D7T1R6	D7T1R6_VITVI Putative uncharacterized protein OS=Vitis vinifera GN=VIT_00s0264g00030 PE=4 SV=1	vvi:100242027	hypothetical protein LOC100242027 ; K01681 aconitate hydratase 1 [EC:4.2.1.3]	PB012921|Pfam-B_12921; PF00330.15|Aconitase; PB004717|Pfam-B_4717; PF00694.14|Aconitase_C; PB002084|Pfam-B_2084; PB003732|Pfam-B_3732	IPR000573|Aconitase A/isopropylmalate dehydratase small subunit, swivel; IPR001030|Aconitase/3-isopropylmalate dehydratase large subunit, alpha/beta/alpha; IPR015934|Aconitase/Iron regulatory protein 2/2-methylisocitrate dehydratase; IPR015937|Aconitase/isopropylmalate dehydratase; IPR018136|Aconitase family, 4Fe-4S cluster binding site	GO:0008152|metabolic process	9	25	7	21	-1.53393	-1.5724	1.67	1.51	-1	-1
Gh_D13G1335	D13	+	42063479	42072462	AT1G54340	isocitrate dehydrogenase	P50218	IDHC_TOBAC Isocitrate dehydrogenase [NADP] OS=Nicotiana tabacum PE=2 SV=1	M5WUJ4	M5WUJ4_PRUPE Uncharacterized protein OS=Prunus persica GN=PRUPE_ppa006334mg PE=4 SV=1	pop:POPTR_770098	hypothetical protein ; K00031 isocitrate dehydrogenase [EC:1.1.1.42]	PF00180.15|Iso_dh	IPR004790|Isocitrate dehydrogenase NADP-dependent; IPR019818|Isocitrate/isopropylmalate dehydrogenase, conserved site; IPR024084|Isopropylmalate dehydrogenase-like domain	GO:0004450|isocitrate dehydrogenase (NADP+) activity; GO:0000287|magnesium ion binding ; GO:0016616|oxidoreductase activity, acting on the CH-OH group of donors, NAD or NADP as acceptor ; GO:0006102|isocitrate metabolic process; GO:0051287|NAD binding ; GO:0055114|oxidation-reduction process	16	19	30	63	-0.245122	-1.06458	0.23	2.01	0	-1
Gh_A13G1069	A13	+	60500634	60509658	AT1G54340	isocitrate dehydrogenase	P50218	IDHC_TOBAC Isocitrate dehydrogenase [NADP] OS=Nicotiana tabacum PE=2 SV=1	M5WUJ4	M5WUJ4_PRUPE Uncharacterized protein OS=Prunus persica GN=PRUPE_ppa006334mg PE=4 SV=1	pop:POPTR_770098	hypothetical protein ; K00031 isocitrate dehydrogenase [EC:1.1.1.42]	PF00180.15|Iso_dh	IPR004790|Isocitrate dehydrogenase NADP-dependent; IPR019818|Isocitrate/isopropylmalate dehydrogenase, conserved site; IPR024084|Isopropylmalate dehydrogenase-like domain	GO:0004450|isocitrate dehydrogenase (NADP+) activity; GO:0000287|magnesium ion binding ; GO:0016616|oxidoreductase activity, acting on the CH-OH group of donors, NAD or NADP as acceptor ; GO:0006102|isocitrate metabolic process; GO:0051287|NAD binding ; GO:0055114|oxidation-reduction process	17	15	26	57	0.215111	-1.16927	0.11	1.3	0	-1
Gh_A04G0320	A04	-	7659308	7661994	AT1G53240	Lactate/malate dehydrogenase family protein	P83373	MDHM_FRAAN Malate dehydrogenase, mitochondrial OS=Fragaria ananassa GN=MMDHI PE=1 SV=1	B9SE47	B9SE47_RICCO Malate dehydrogenase OS=Ricinus communis GN=RCOM_1520380 PE=3 SV=1	pop:POPTR_822907	hypothetical protein ; K00026 malate dehydrogenase [EC:1.1.1.37]	PF00056.18|Ldh_1_N; PF02866.13|Ldh_1_C	IPR001236|Lactate/malate dehydrogenase, N-terminal; IPR001252|Malate dehydrogenase, active site; IPR001557|L-lactate/malate dehydrogenase; IPR010097|Malate dehydrogenase, type 1; IPR022383|Lactate/malate dehydrogenase, C-terminal	GO:0016616|oxidoreductase activity, acting on the CH-OH group of donors, NAD or NADP as acceptor ; GO:0016615|malate dehydrogenase activity; GO:0044262|cellular carbohydrate metabolic process ; GO:0055114|oxidation-reduction process ; GO:0030060|L-malate dehydrogenase activity; GO:0016491|oxidoreductase activity ; GO:0006108|malate metabolic process	103	70	101	216	0.557444	-1.08921	0.47	1.39	0	-1
Gh_A07G1844	A07	-	73443150	73446879	AT3G15020	Lactate/malate dehydrogenase family protein	Q9LKA3	MDHM2_ARATH Malate dehydrogenase 2, mitochondrial OS=Arabidopsis thaliana GN=At3g15020 PE=1 SV=1	B9SBE8	B9SBE8_RICCO Putative uncharacterized protein OS=Ricinus communis GN=RCOM_0716680 PE=4 SV=1	ath:AT3G15020	malate dehydrogenase (NAD), mitochondrial, putative ; K00026 malate dehydrogenase [EC:1.1.1.37]		IPR001252|Malate dehydrogenase, active site; IPR001557|L-lactate/malate dehydrogenase; IPR010097|Malate dehydrogenase, type 1	GO:0016616|oxidoreductase activity, acting on the CH-OH group of donors, NAD or NADP as acceptor ; GO:0016615|malate dehydrogenase activity; GO:0044262|cellular carbohydrate metabolic process ; GO:0055114|oxidation-reduction process ; GO:0030060|L-malate dehydrogenase activity; GO:0006108|malate metabolic process	7	13	8	23	-0.788455	-1.58273	0.67	1.56	0	-1
Gh_A09G0577	A09	-	47665145	47670392	AT4G13430	isopropyl malate isomerase large subunit 1	Q94AR8	LEUC_ARATH 3-isopropylmalate dehydratase OS=Arabidopsis thaliana GN=IIL1 PE=2 SV=1	M5XSL7	M5XSL7_PRUPE Uncharacterized protein OS=Prunus persica GN=PRUPE_ppa004448mg PE=4 SV=1	pop:POPTR_821804	hypothetical protein ; K01703 3-isopropylmalate/(R)-2-methylmalate dehydratase large subunit [EC:4.2.1.33]	PF00330.15|Aconitase	IPR001030|Aconitase/3-isopropylmalate dehydratase large subunit, alpha/beta/alpha; IPR006251|Homoaconitase/3-isopropylmalate dehydratase, large subunit; IPR015937|Aconitase/isopropylmalate dehydratase	GO:0008652|cellular amino acid biosynthetic process ; GO:0016836|hydro-lyase activity; GO:0008152|metabolic process ; GO:0051539|4 iron, 4 sulfur cluster binding	7	7	10	22	-0.0896116	-1.14596	0.07	1.86	0	-1
Gh_D07G0663	D07	+	7736819	7738057	AT3G47520	malate dehydrogenase	Q9SN86	MDHP_ARATH Malate dehydrogenase, chloroplastic OS=Arabidopsis thaliana GN=At3g47520 PE=1 SV=1	B9N6Q8	B9N6Q8_POPTR Predicted protein OS=Populus trichocarpa GN=POPTRDRAFT_785828 PE=3 SV=1	pop:POPTR_583880	hypothetical protein ; K00026 malate dehydrogenase [EC:1.1.1.37]	PF00056.18|Ldh_1_N; PF02866.13|Ldh_1_C	IPR001236|Lactate/malate dehydrogenase, N-terminal; IPR001252|Malate dehydrogenase, active site; IPR001557|L-lactate/malate dehydrogenase; IPR010097|Malate dehydrogenase, type 1; IPR022383|Lactate/malate dehydrogenase, C-terminal	GO:0016616|oxidoreductase activity, acting on the CH-OH group of donors, NAD or NADP as acceptor ; GO:0016615|malate dehydrogenase activity; GO:0044262|cellular carbohydrate metabolic process ; GO:0055114|oxidation-reduction process ; GO:0030060|L-malate dehydrogenase activity; GO:0016491|oxidoreductase activity ; GO:0006108|malate metabolic process	16	7	15	22	1.12601	-0.518794	1.58	1.13	1	0
Gh_D02G0438	D02	-	5773634	5776021	AT5G43330	Lactate/malate dehydrogenase family protein	Q9FSF0	MDH_TOBAC Malate dehydrogenase OS=Nicotiana tabacum GN=MD1 PE=1 SV=1	D2D318	D2D318_GOSHI Malate dehydrogenase OS=Gossypium hirsutum PE=2 SV=1	pop:POPTR_747123	hypothetical protein ; K00026 malate dehydrogenase [EC:1.1.1.37]	PF00056.18|Ldh_1_N; PB008588|Pfam-B_8588; PF02866.13|Ldh_1_C	IPR001236|Lactate/malate dehydrogenase, N-terminal; IPR001252|Malate dehydrogenase, active site; IPR010945|Malate dehydrogenase, type 2; IPR022383|Lactate/malate dehydrogenase, C-terminal	GO:0016616|oxidoreductase activity, acting on the CH-OH group of donors, NAD or NADP as acceptor ; GO:0016615|malate dehydrogenase activity; GO:0055114|oxidation-reduction process ; GO:0016491|oxidoreductase activity ; GO:0006108|malate metabolic process	215	98	302	514	1.13714	-0.766571	1.59	2.13	1	0
Gh_A10G2294	scaffold2503_A10	-	57412	60654	AT5G43330	Lactate/malate dehydrogenase family protein	Q9FSF0	MDH_TOBAC Malate dehydrogenase OS=Nicotiana tabacum GN=MD1 PE=1 SV=1	D2D318	D2D318_GOSHI Malate dehydrogenase OS=Gossypium hirsutum PE=2 SV=1	pop:POPTR_747123	hypothetical protein ; K00026 malate dehydrogenase [EC:1.1.1.37]	PF00056.18|Ldh_1_N; PB008588|Pfam-B_8588; PF02866.13|Ldh_1_C	IPR001236|Lactate/malate dehydrogenase, N-terminal; IPR001252|Malate dehydrogenase, active site; IPR010945|Malate dehydrogenase, type 2; IPR022383|Lactate/malate dehydrogenase, C-terminal	GO:0016616|oxidoreductase activity, acting on the CH-OH group of donors, NAD or NADP as acceptor ; GO:0016615|malate dehydrogenase activity; GO:0055114|oxidation-reduction process ; GO:0016491|oxidoreductase activity ; GO:0006108|malate metabolic process	121	58	91	151	1.07473	-0.740817	1.33	1.22	1	0
Gh_A02G1139	A02	-	62327400	62332541	AT1G79750	NADP-malic enzyme 4	Q9CA83	MAOP4_ARATH NADP-dependent malic enzyme 4, chloroplastic OS=Arabidopsis thaliana GN=NADP-ME4 PE=1 SV=1	I4AXX7	I4AXX7_9ROSI Malic enzyme OS=Dimocarpus longan PE=2 SV=1	ath:AT1G79750	ATNADP-ME4 (NADP-MALIC ENZYME 4); malate dehydrogenase (oxaloacetate-decarboxylating) (NADP+)/ malic enzyme/ oxidoreductase, acting on NADH or NADPH, NAD or NADP as acceptor ; K00029 malate dehydrogenase (oxaloacetate-decarboxylating)(NADP+) [EC:1.1.1.40]	PB005789|Pfam-B_5789; PF03949.10|Malic_M; PB004884|Pfam-B_4884; PF00390.14|malic	IPR001891|Malic oxidoreductase; IPR012301|Malic enzyme, N-terminal; IPR012302|Malic enzyme, NAD-binding; IPR015884|Malic enzyme, conserved site	GO:0016619|malate dehydrogenase (oxaloacetate-decarboxylating) activity; GO:0046872|metal ion binding ; GO:0016616|oxidoreductase activity, acting on the CH-OH group of donors, NAD or NADP as acceptor ; GO:0004470|malic enzyme activity; GO:0051287|NAD binding ; GO:0055114|oxidation-reduction process ; GO:0016491|oxidoreductase activity ; GO:0006108|malate metabolic process	62	69	57	119	-0.159566	-1.05069	0.16	1.44	0	-1
Gh_D03G0562	D03	-	11288817	11293979	AT1G79750	NADP-malic enzyme 4	Q9CA83	MAOP4_ARATH NADP-dependent malic enzyme 4, chloroplastic OS=Arabidopsis thaliana GN=NADP-ME4 PE=1 SV=1	I4AXX7	I4AXX7_9ROSI Malic enzyme OS=Dimocarpus longan PE=2 SV=1	ath:AT1G79750	ATNADP-ME4 (NADP-MALIC ENZYME 4); malate dehydrogenase (oxaloacetate-decarboxylating) (NADP+)/ malic enzyme/ oxidoreductase, acting on NADH or NADPH, NAD or NADP as acceptor ; K00029 malate dehydrogenase (oxaloacetate-decarboxylating)(NADP+) [EC:1.1.1.40]	PB005789|Pfam-B_5789; PF03949.10|Malic_M; PB004884|Pfam-B_4884; PF00390.14|malic	IPR001891|Malic oxidoreductase; IPR012301|Malic enzyme, N-terminal; IPR012302|Malic enzyme, NAD-binding; IPR015884|Malic enzyme, conserved site	GO:0016619|malate dehydrogenase (oxaloacetate-decarboxylating) activity; GO:0046872|metal ion binding ; GO:0016616|oxidoreductase activity, acting on the CH-OH group of donors, NAD or NADP as acceptor ; GO:0004470|malic enzyme activity; GO:0051287|NAD binding ; GO:0055114|oxidation-reduction process ; GO:0016491|oxidoreductase activity ; GO:0006108|malate metabolic process	47	51	50	124	-0.107867	-1.3257	0.07	1.4	0	-1
Gh_D07G0086	D07	+	976775	980658	AT2G19900	NADP-malic enzyme 1	P51615	MAOX_VITVI NADP-dependent malic enzyme OS=Vitis vinifera PE=2 SV=1	B9RKI6	B9RKI6_RICCO Malic enzyme OS=Ricinus communis GN=RCOM_1049930 PE=3 SV=1	vvi:100233140	malate dehydrogenase (NADP+) ; K00029 malate dehydrogenase (oxaloacetate-decarboxylating)(NADP+) [EC:1.1.1.40]	PB005789|Pfam-B_5789; PF03949.10|Malic_M; PB004884|Pfam-B_4884; PF00390.14|malic	IPR001891|Malic oxidoreductase; IPR012301|Malic enzyme, N-terminal; IPR012302|Malic enzyme, NAD-binding; IPR015884|Malic enzyme, conserved site	GO:0016619|malate dehydrogenase (oxaloacetate-decarboxylating) activity; GO:0046872|metal ion binding ; GO:0016616|oxidoreductase activity, acting on the CH-OH group of donors, NAD or NADP as acceptor ; GO:0004470|malic enzyme activity; GO:0051287|NAD binding ; GO:0055114|oxidation-reduction process ; GO:0016491|oxidoreductase activity ; GO:0006108|malate metabolic process	3	6	12	28	-0.820982	-1.27696	0.89	2.87	0	-1
Gh_D05G2998	D05	-	37402121	37402763	AT4G00570	NAD-dependent malic enzyme 2	Q8L7K9	MAO2_ARATH NAD-dependent malic enzyme 2, mitochondrial OS=Arabidopsis thaliana GN=NAD-ME2 PE=1 SV=1	I1L6N5	I1L6N5_SOYBN Malic enzyme OS=Glycine max PE=3 SV=1	ath:AT4G00570	malate oxidoreductase, putative ; K00028 malate dehydrogenase (decarboxylating) [EC:1.1.1.39]	PF03949.10|Malic_M	IPR001891|Malic oxidoreductase; IPR012302|Malic enzyme, NAD-binding; IPR015884|Malic enzyme, conserved site	GO:0016619|malate dehydrogenase (oxaloacetate-decarboxylating) activity; GO:0046872|metal ion binding ; GO:0016616|oxidoreductase activity, acting on the CH-OH group of donors, NAD or NADP as acceptor ; GO:0004470|malic enzyme activity; GO:0051287|NAD binding ; GO:0055114|oxidation-reduction process ; GO:0016491|oxidoreductase activity ; GO:0006108|malate metabolic process	2	4	5	16	-1.22391	-1.58178	0.49	1.46	0	-1
Gh_D11G2506	D11	-	51331629	51334128	AT4G00570	NAD-dependent malic enzyme 2	P37225	MAON_SOLTU NAD-dependent malic enzyme 59 kDa isoform, mitochondrial OS=Solanum tuberosum PE=1 SV=1	B9GPX3	B9GPX3_POPTR Malic enzyme OS=Populus trichocarpa GN=POPTRDRAFT_552135 PE=3 SV=1	ath:AT4G00570	malate oxidoreductase, putative ; K00028 malate dehydrogenase (decarboxylating) [EC:1.1.1.39]	PF03949.10|Malic_M; PF00390.14|malic	IPR012301|Malic enzyme, N-terminal; IPR012302|Malic enzyme, NAD-binding	GO:0016619|malate dehydrogenase (oxaloacetate-decarboxylating) activity; GO:0016616|oxidoreductase activity, acting on the CH-OH group of donors, NAD or NADP as acceptor ; GO:0051287|NAD binding ; GO:0055114|oxidation-reduction process	2	11	5	9	-2.58022	-0.854415	1.47	0.85	-1	0
Gh_A05G0358	A05	-	3877466	3881132	AT5G25880	NADP-malic enzyme 3	P51615	MAOX_VITVI NADP-dependent malic enzyme OS=Vitis vinifera PE=2 SV=1	D7TBH4	D7TBH4_VITVI Malic enzyme OS=Vitis vinifera GN=VIT_11s0016g03210 PE=2 SV=1	vvi:100233140	malate dehydrogenase (NADP+) ; K00029 malate dehydrogenase (oxaloacetate-decarboxylating)(NADP+) [EC:1.1.1.40]	PB005789|Pfam-B_5789; PF03949.10|Malic_M; PB004884|Pfam-B_4884; PF00390.14|malic	IPR001891|Malic oxidoreductase; IPR012301|Malic enzyme, N-terminal; IPR012302|Malic enzyme, NAD-binding; IPR015884|Malic enzyme, conserved site	GO:0016619|malate dehydrogenase (oxaloacetate-decarboxylating) activity; GO:0046872|metal ion binding ; GO:0016616|oxidoreductase activity, acting on the CH-OH group of donors, NAD or NADP as acceptor ; GO:0004470|malic enzyme activity; GO:0051287|NAD binding ; GO:0055114|oxidation-reduction process ; GO:0016491|oxidoreductase activity ; GO:0006108|malate metabolic process	41	100	20	35	-1.28028	-0.82965	3.02	1.46	-1	0
Gh_D05G0474	D05	-	3793413	3797060	AT5G25880	NADP-malic enzyme 3	P51615	MAOX_VITVI NADP-dependent malic enzyme OS=Vitis vinifera PE=2 SV=1	B9RKI6	B9RKI6_RICCO Malic enzyme OS=Ricinus communis GN=RCOM_1049930 PE=3 SV=1	vvi:100233140	malate dehydrogenase (NADP+) ; K00029 malate dehydrogenase (oxaloacetate-decarboxylating)(NADP+) [EC:1.1.1.40]	PB005789|Pfam-B_5789; PF03949.10|Malic_M; PB004884|Pfam-B_4884; PF00390.14|malic	IPR001891|Malic oxidoreductase; IPR012301|Malic enzyme, N-terminal; IPR012302|Malic enzyme, NAD-binding; IPR015884|Malic enzyme, conserved site	GO:0016619|malate dehydrogenase (oxaloacetate-decarboxylating) activity; GO:0046872|metal ion binding ; GO:0016616|oxidoreductase activity, acting on the CH-OH group of donors, NAD or NADP as acceptor ; GO:0004470|malic enzyme activity; GO:0051287|NAD binding ; GO:0055114|oxidation-reduction process ; GO:0016491|oxidoreductase activity ; GO:0006108|malate metabolic process	30	86	23	28	-1.5332	-0.299902	2.61	0.39	-1	0
Gh_A11G3272	scaffold3046_A11	+	54230	57108	AT1G09430	ATP-citrate lyase A-3	O80526	ACLA3_ARATH ATP-citrate synthase alpha chain protein 3 OS=Arabidopsis thaliana GN=ACLA-3 PE=2 SV=1	M1BK68	M1BK68_SOLTU Uncharacterized protein OS=Solanum tuberosum GN=PGSC0003DMG403018293 PE=4 SV=1	pop:POPTR_827990	hypothetical protein ; K01648 ATP citrate (pro-S)-lyase [EC:2.3.3.8]	PB001232|Pfam-B_1232; PF08442.5|ATP-grasp_2	IPR013650|ATP-grasp fold, succinyl-CoA synthetase-type		242	90	184	230	1.43239	-0.325017	1.89	0.62	1	0
Gh_D11G2832	D11	+	58253847	58256744	AT1G09430	ATP-citrate lyase A-3	Q2QZ86	ACLA2_ORYSJ ATP-citrate synthase alpha chain protein 2 OS=Oryza sativa subsp. japonica GN=ACLA-2 PE=2 SV=2	B9N432	B9N432_POPTR Predicted protein OS=Populus trichocarpa GN=POPTRDRAFT_827990 PE=2 SV=1	pop:POPTR_827990	hypothetical protein ; K01648 ATP citrate (pro-S)-lyase [EC:2.3.3.8]	PB001232|Pfam-B_1232; PF08442.5|ATP-grasp_2	IPR013650|ATP-grasp fold, succinyl-CoA synthetase-type		181	76	182	228	1.2597	-0.328471	2.16	1.02	1	0
Gh_A12G1327	A12	+	69849220	69852412	AT1G60810	ATP-citrate lyase A-2	Q9SGY2	ACLA1_ARATH ATP-citrate synthase alpha chain protein 1 OS=Arabidopsis thaliana GN=ACLA-1 PE=1 SV=1	M1CEI7	M1CEI7_SOLTU Uncharacterized protein OS=Solanum tuberosum GN=PGSC0003DMG400025587 PE=4 SV=1	ath:AT1G10670	ACLA-1; ACLA-1 (ATP-citrate lyase A-1) ; K01648 ATP citrate (pro-S)-lyase [EC:2.3.3.8]	PB001232|Pfam-B_1232; PF08442.5|ATP-grasp_2	IPR013650|ATP-grasp fold, succinyl-CoA synthetase-type		120	46	104	194	1.40136	-0.898372	1.97	2.11	1	0
Gh_D12G1452	D12	+	44396082	44399289	AT1G60810	ATP-citrate lyase A-2	Q9SGY2	ACLA1_ARATH ATP-citrate synthase alpha chain protein 1 OS=Arabidopsis thaliana GN=ACLA-1 PE=1 SV=1	M1CEI7	M1CEI7_SOLTU Uncharacterized protein OS=Solanum tuberosum GN=PGSC0003DMG400025587 PE=4 SV=1	vvi:100255189	GSVIVT00002749001; hypothetical protein LOC100255189 ; K01648 ATP citrate (pro-S)-lyase [EC:2.3.3.8]	PB001232|Pfam-B_1232; PF08442.5|ATP-grasp_2	IPR013650|ATP-grasp fold, succinyl-CoA synthetase-type		102	33	70	95	1.64613	-0.448904	2.09	0.92	1	0
Gh_A10G1534	A10	+	84091764	84096031	AT5G49460	ATP citrate lyase subunit B 2	Q9FGX1	ACLB2_ARATH ATP-citrate synthase beta chain protein 2 OS=Arabidopsis thaliana GN=ACLB-2 PE=1 SV=1	M5XNZ7	M5XNZ7_PRUPE Uncharacterized protein OS=Prunus persica GN=PRUPE_ppa003053mg PE=4 SV=1	pop:POPTR_656642	hypothetical protein ; K01648 ATP citrate (pro-S)-lyase [EC:2.3.3.8]	PB003892|Pfam-B_3892; PF00285.16|Citrate_synt; PF00549.14|Ligase_CoA; PB000541|Pfam-B_541; PB003979|Pfam-B_3979	IPR002020|Citrate synthase-like; IPR005810|Succinyl-CoA ligase, alpha subunit; IPR005811|ATP-citrate lyase/succinyl-CoA ligase; IPR017440|ATP-citrate lyase/succinyl-CoA ligase, active site; IPR017866|Succinyl-CoA synthetase, beta subunit, conserved site	GO:0004775|succinate-CoA ligase (ADP-forming) activity; GO:0003878|ATP citrate synthase activity; GO:0008152|metabolic process ; GO:0046912|transferase activity, transferring acyl groups, acyl groups converted into alkyl on transfer ; GO:0044262|cellular carbohydrate metabolic process ; GO:0003824|catalytic activity	188	56	172	241	1.7492	-0.48951	2.5	1.57	1	0
Gh_D10G1780	D10	+	50187012	50190092	AT5G49460	ATP citrate lyase subunit B 2	Q93VT8	ACLB1_ORYSJ ATP-citrate synthase beta chain protein 1 OS=Oryza sativa subsp. japonica GN=ACLB-1 PE=2 SV=1	B9RZR0	B9RZR0_RICCO ATP-citrate synthase, putative OS=Ricinus communis GN=RCOM_1000580 PE=4 SV=1	vvi:100267071	GSVIVT00033143001; hypothetical protein LOC100267071 ; K01648 ATP citrate (pro-S)-lyase [EC:2.3.3.8]	PB003892|Pfam-B_3892; PF00549.14|Ligase_CoA; PB000541|Pfam-B_541; PB003979|Pfam-B_3979	IPR005810|Succinyl-CoA ligase, alpha subunit; IPR005811|ATP-citrate lyase/succinyl-CoA ligase; IPR017440|ATP-citrate lyase/succinyl-CoA ligase, active site; IPR017866|Succinyl-CoA synthetase, beta subunit, conserved site	GO:0004775|succinate-CoA ligase (ADP-forming) activity; GO:0003878|ATP citrate synthase activity; GO:0008152|metabolic process ; GO:0003824|catalytic activity	105	39	195	224	1.43887	-0.198863	1.77	0.65	1	0
Gh_D01G2294	scaffold3710_D01	+	39662	43816	AT5G49460	ATP citrate lyase subunit B 2	Q93VT8	ACLB1_ORYSJ ATP-citrate synthase beta chain protein 1 OS=Oryza sativa subsp. japonica GN=ACLB-1 PE=2 SV=1	M5XNZ7	M5XNZ7_PRUPE Uncharacterized protein OS=Prunus persica GN=PRUPE_ppa003053mg PE=4 SV=1	vvi:100267071	GSVIVT00033143001; hypothetical protein LOC100267071 ; K01648 ATP citrate (pro-S)-lyase [EC:2.3.3.8]	PB003892|Pfam-B_3892; PF00285.16|Citrate_synt; PF00549.14|Ligase_CoA; PB000541|Pfam-B_541; PB003979|Pfam-B_3979	IPR002020|Citrate synthase-like; IPR005810|Succinyl-CoA ligase, alpha subunit; IPR005811|ATP-citrate lyase/succinyl-CoA ligase; IPR017440|ATP-citrate lyase/succinyl-CoA ligase, active site; IPR017866|Succinyl-CoA synthetase, beta subunit, conserved site	GO:0004775|succinate-CoA ligase (ADP-forming) activity; GO:0003878|ATP citrate synthase activity; GO:0008152|metabolic process ; GO:0046912|transferase activity, transferring acyl groups, acyl groups converted into alkyl on transfer ; GO:0044262|cellular carbohydrate metabolic process ; GO:0003824|catalytic activity	259	59	156	133	2.13858	0.224089	2.7	0.46	1	0
Gh_A01G0224	A01	+	2187286	2191439	AT5G49460	ATP citrate lyase subunit B 2	Q93VT8	ACLB1_ORYSJ ATP-citrate synthase beta chain protein 1 OS=Oryza sativa subsp. japonica GN=ACLB-1 PE=2 SV=1	I1MGE7	I1MGE7_SOYBN Uncharacterized protein OS=Glycine max PE=4 SV=1	vvi:100267071	GSVIVT00033143001; hypothetical protein LOC100267071 ; K01648 ATP citrate (pro-S)-lyase [EC:2.3.3.8]	PB003892|Pfam-B_3892; PF00285.16|Citrate_synt; PF00549.14|Ligase_CoA; PB000541|Pfam-B_541; PB003979|Pfam-B_3979	IPR002020|Citrate synthase-like; IPR005810|Succinyl-CoA ligase, alpha subunit; IPR005811|ATP-citrate lyase/succinyl-CoA ligase; IPR017440|ATP-citrate lyase/succinyl-CoA ligase, active site; IPR017866|Succinyl-CoA synthetase, beta subunit, conserved site	GO:0004775|succinate-CoA ligase (ADP-forming) activity; GO:0003878|ATP citrate synthase activity; GO:0008152|metabolic process ; GO:0046912|transferase activity, transferring acyl groups, acyl groups converted into alkyl on transfer ; GO:0044262|cellular carbohydrate metabolic process ; GO:0003824|catalytic activity	257	56	122	112	2.18791	0.116743	2.96	0.22	1	0
Gh_D02G1653	D02	+	56960888	56968518	AT1G70410	beta carbonic anhydrase 4	P27141	CAHC_TOBAC Carbonic anhydrase, chloroplastic OS=Nicotiana tabacum PE=2 SV=1	B9SHA8	B9SHA8_RICCO Carbonic anhydrase OS=Ricinus communis GN=RCOM_0528440 PE=3 SV=1	pop:POPTR_814132	hypothetical protein ; K01673 carbonic anhydrase [EC:4.2.1.1]	PB001771|Pfam-B_1771; PF00484.14|Pro_CA	IPR001765|Carbonic anhydrase; IPR015892|Carbonic anhydrase, prokaryotic-like, conserved site	GO:0015976|carbon utilization; GO:0008270|zinc ion binding ; GO:0004089|carbonate dehydratase activity	3	3	4	23	-0.318454	-2.44235	0.11	1.88	0	-1
Gh_A05G1879	A05	+	19679340	19681328	AT4G33580	beta carbonic anhydrase 5	P27141	CAHC_TOBAC Carbonic anhydrase, chloroplastic OS=Nicotiana tabacum PE=2 SV=1	I1JGZ6	I1JGZ6_SOYBN Carbonic anhydrase OS=Glycine max PE=3 SV=1	vvi:100263997	hypothetical protein LOC100263997 ; K01673 carbonic anhydrase [EC:4.2.1.1]	PF00484.14|Pro_CA	IPR001765|Carbonic anhydrase; IPR015892|Carbonic anhydrase, prokaryotic-like, conserved site	GO:0015976|carbon utilization; GO:0008270|zinc ion binding ; GO:0004089|carbonate dehydratase activity	7	2	10	25	1.79176	-1.31824	0.57	1.42	0	-1
Gh_A03G1758	A03	+	98782911	98784726	AT4G34700	LYR family of Fe/S cluster biogenesis protein	Q945M1	NDUB9_ARATH NADH dehydrogenase [ubiquinone] 1 beta subcomplex subunit 9 OS=Arabidopsis thaliana GN=CIB22 PE=2 SV=1	B9RHE0	B9RHE0_RICCO NADH dehydrogenase, putative OS=Ricinus communis GN=RCOM_1450680 PE=4 SV=1	vvi:100246984	hypothetical protein LOC100246984 ; K03965 NADH dehydrogenase (ubiquinone) 1 beta subcomplex 9 [EC:1.6.5.3 1.6.99.3]	PF05347.10|Complex1_LYR	IPR008011|Complex 1 LYR protein		39	25	34	69	0.639606	-1.0205	0.63	1.37	0	-1
Gh_A05G3468	A05	+	90140563	90141602	AT3G27890	NADPH:quinone oxidoreductase	Q9LK88	NQR_ARATH NADPH:quinone oxidoreductase OS=Arabidopsis thaliana GN=NQR PE=1 SV=1	M5X157	M5X157_PRUPE Uncharacterized protein OS=Prunus persica GN=PRUPE_ppa011740mg PE=4 SV=1	afm:AFUA_5G15030	arsenic resistance protein ArsH (EC:1.5.1.-); K11811 arsenical resistance protein ArsH	PF03358.10|FMN_red	IPR005025|NADPH-dependent FMN reductase		8	6	22	52	0.583146	-1.23527	0.28	1.91	0	-1
Gh_A13G2236	scaffold3564_A13	+	344623	345406	ATMG01275	NADH dehydrogenase 1A	Q01148	NU1M_WHEAT NADH-ubiquinone oxidoreductase chain 1 OS=Triticum aestivum GN=ND1 PE=2 SV=1	H6WES1	H6WES1_9POAL NADH-ubiquinone oxidoreductase chain 1 (Fragment) OS=Ferrocalamus rimosivaginus GN=nad1 PE=3 SV=1	ath:AT2G07785	NADH-ubiquinone oxidoreductase, putative ; K03878 NADH dehydrogenase I subunit 1 [EC:1.6.5.3]	PF00146.16|NADHdh	IPR001694|NADH:ubiquinone oxidoreductase, subunit 1/F420H2 oxidoreductase subunit H	GO:0016020|membrane ; GO:0055114|oxidation-reduction process	5	7	14	3	-0.360882	2.29141	0.22	1.32	0	1
Gh_D01G0976	D01	-	17420526	17423614	AT1G19580	gamma carbonic anhydrase 1	Q9FWR5	GCA1_ARATH Gamma carbonic anhydrase 1, mitochondrial OS=Arabidopsis thaliana GN=GAMMACA1 PE=1 SV=1	B9R7W8	B9R7W8_RICCO Protein yrdA, putative OS=Ricinus communis GN=RCOM_1594910 PE=4 SV=1	cpv:cgd5_3750	dynactin subunit p25-like ; K10427 dynactin 5	PF00132.19|Hexapep	IPR001451|Bacterial transferase hexapeptide repeat		71	35	88	97	1.03218	-0.150996	1.43	0.31	1	0
Gh_D07G0507	D07	-	5749413	5751683	AT3G48680	gamma carbonic anhydrase-like 2	Q9FMV1	GCAL1_ARATH Gamma carbonic anhydrase-like 1, mitochondrial OS=Arabidopsis thaliana GN=GAMMACAL1 PE=1 SV=1	B9RAD6	B9RAD6_RICCO Protein yrdA, putative OS=Ricinus communis GN=RCOM_1505640 PE=4 SV=1	lbc:LACBIDRAFT_296361	dynactin, subunit p25; K10427 dynactin 5				62	30	79	99	1.0633	-0.319202	1.85	1.04	1	0
Gh_D04G1998	scaffold3975_D04	+	59981	60463	AT2G07785	NADH dehydrogenase family protein	P31839	NU1M_OENBE NADH-ubiquinone oxidoreductase chain 1 OS=Oenothera berteriana GN=ND1 PE=2 SV=1	Q95868	Q95868_NICSY Orf105 (Fragment) OS=Nicotiana sylvestris PE=4 SV=1	ath:AT2G07785	NADH-ubiquinone oxidoreductase, putative ; K03878 NADH dehydrogenase I subunit 1 [EC:1.6.5.3]	PF00146.16|NADHdh	IPR001694|NADH:ubiquinone oxidoreductase, subunit 1/F420H2 oxidoreductase subunit H	GO:0016020|membrane ; GO:0055114|oxidation-reduction process	8	7	19	7	0.187226	1.42133	0.13	1.54	0	1
Gh_D05G2758	D05	-	29895073	29895866	AT4G02580	NADH-ubiquinone oxidoreductase 24 kDa subunit, putative	O22769	NDUV2_ARATH NADH dehydrogenase [ubiquinone] flavoprotein 2, mitochondrial OS=Arabidopsis thaliana GN=At4g02580 PE=1 SV=3	B9H8G8	B9H8G8_POPTR Predicted protein OS=Populus trichocarpa GN=POPTRDRAFT_831609 PE=3 SV=1	pop:POPTR_831609	hypothetical protein ; K03943 NADH dehydrogenase (ubiquinone) flavoprotein 2 [EC:1.6.5.3 1.6.99.3]	PF01257.14|2Fe-2S_thioredx	IPR002023|NADH-quinone oxidoreductase subunit E like	GO:0055114|oxidation-reduction process ; GO:0016491|oxidoreductase activity	3	7	5	20	-1.1314	-1.84811	1.06	2.41	0	-1
Gh_D07G2401	scaffold4170_D07	+	2301	4109	AT5G11770	NADH-ubiquinone oxidoreductase 20 kDa subunit, mitochondrial	P42027	NDUS7_BRAOL NADH dehydrogenase [ubiquinone] iron-sulfur protein 7, mitochondrial OS=Brassica oleracea PE=2 SV=1	M4CXJ1	M4CXJ1_BRARP Uncharacterized protein OS=Brassica rapa subsp. pekinensis GN=Bra008938 PE=3 SV=1	pop:POPTR_561685	hypothetical protein ; K03940 NADH dehydrogenase (ubiquinone) Fe-S protein 7 [EC:1.6.5.3 1.6.99.3]	PF01058.17|Oxidored_q6	IPR006137|NADH:ubiquinone oxidoreductase-like, 20kDa subunit; IPR006138|NADH-ubiquinone oxidoreductase, 20 Kd subunit; IPR014406|[NiFe]-hydrogenase-3-type complex, small subunit/NADH:quinone oxidoreductase, subunit NuoB	GO:0016651|oxidoreductase activity, acting on NAD(P)H ; GO:0051539|4 iron, 4 sulfur cluster binding ; GO:0048038|quinone binding ; GO:0055114|oxidation-reduction process ; GO:0051536|iron-sulfur cluster binding ; GO:0008137|NADH dehydrogenase (ubiquinone) activity	86	42	124	106	1.04455	0.222665	2.53	1.1	1	0
Gh_A10G1241	A10	+	64599150	64607730	AT2G43400	electron-transfer flavoprotein:ubiquinone oxidoreductase	Q54XM6	ETFD_DICDI Electron transfer flavoprotein-ubiquinone oxidoreductase, mitochondrial OS=Dictyostelium discoideum GN=etfdh PE=3 SV=1	M5XQI5	M5XQI5_PRUPE Uncharacterized protein OS=Prunus persica GN=PRUPE_ppa002564mg PE=4 SV=1	vvi:100244062	hypothetical protein LOC100244062 ; K00311 electron-transferring-flavoprotein dehydrogenase [EC:1.5.5.1]	PB015525|Pfam-B_15525; PB009905|Pfam-B_9905; PB003163|Pfam-B_3163; PF13450.1|NAD_binding_8; PF05187.8|ETF_QO; PB000569|Pfam-B_569	IPR007859|Electron transfer flavoprotein-ubiquinone oxidoreductase	GO:0004174|electron-transferring-flavoprotein dehydrogenase activity ; GO:0055114|oxidation-reduction process	16	17	24	52	-0.122962	-1.15461	0.09	1.76	0	-1
Gh_D09G0566	D09	-	27510089	27513818	AT5G43430	electron transfer flavoprotein beta	Q9LSW8	ETFB_ARATH Electron transfer flavoprotein subunit beta, mitochondrial OS=Arabidopsis thaliana GN=ETFB PE=1 SV=1	B9STH5	B9STH5_RICCO Electron transfer flavoprotein beta-subunit, putative OS=Ricinus communis GN=RCOM_0491720 PE=4 SV=1	vvi:100256297	GSVIVT00020216001; hypothetical protein LOC100256297 ; K03521 electron transfer flavoprotein beta subunit	PF01012.16|ETF	IPR000049|Electron transfer flavoprotein, beta-subunit, conserved site; IPR012255|Electron transfer flavoprotein, beta subunit; IPR014730|Electron transfer flavoprotein, alpha/beta-subunit, N-terminal	GO:0009055|electron carrier activity	11	13	21	49	-0.267314	-1.19724	0.21	2.01	0	-1
Gh_A12G0296	A12	+	5071432	5072599	AT1G15120	Ubiquinol-cytochrome C reductase hinge protein	P48504	QCR6_SOLTU Cytochrome b-c1 complex subunit 6 OS=Solanum tuberosum PE=1 SV=2	B9T2H1	B9T2H1_RICCO Ubiquinol-cytochrome c reductase complex 7.8 kDa protein, putative OS=Ricinus communis GN=RCOM_0454060 PE=4 SV=1	osa:4349859	Os11g0162200; hypothetical protein ; K00416 ubiquinol-cytochrome c reductase subunit 6 [EC:1.10.2.2]	PF02320.11|UCR_hinge	IPR003422|Cytochrome b-c1 complex, subunit 6; IPR023184|Ubiquinol-cytochrome C reductase hinge domain	GO:0008121|ubiquinol-cytochrome-c reductase activity ; GO:0006122|mitochondrial electron transport, ubiquinol to cytochrome c	15	13	13	40	0.182322	-1.58533	0.1	1.37	0	-1
Gh_D04G0105	D04	+	1459755	1459928	AT3G10860	Cytochrome b-c1 complex, subunit 8 protein	P46269	QCR8_SOLTU Cytochrome b-c1 complex subunit 8 OS=Solanum tuberosum PE=1 SV=2	D6BQP2	D6BQP2_9ROSI Cytochrome b-c1 complex subunit 8 OS=Jatropha curcas PE=4 SV=1			PF10890.3|DUF2741	IPR020101|Cytochrome b-c1 complex subunit 8, plants		33	23	36	75	0.530628	-1.04911	0.42	1.37	0	-1
Gh_D12G0869	D12	-	28576131	28576466	AT5G13430	Ubiquinol-cytochrome C reductase iron-sulfur subunit	P51134	UCRI4_TOBAC Cytochrome b-c1 complex subunit Rieske-4, mitochondrial OS=Nicotiana tabacum PE=2 SV=1	B9RG04	B9RG04_RICCO Cytochrome b-c1 complex subunit Rieske, mitochondrial OS=Ricinus communis GN=RCOM_1438410 PE=3 SV=1	pop:POPTR_712114	hypothetical protein ; K00411 ubiquinol-cytochrome c reductase iron-sulfur subunit [EC:1.10.2.2]	PF02921.9|UCR_TM	IPR004192|Ubiquinol cytochrome reductase, transmembrane domain; IPR014349|Rieske iron-sulphur protein	GO:0016679|oxidoreductase activity, acting on diphenols and related substances as donors; GO:0008121|ubiquinol-cytochrome-c reductase activity ; GO:0055114|oxidation-reduction process	4	3	7	18	0.374693	-1.30195	0.19	1.63	0	-1
Gh_D04G1765	D04	+	49936953	49938707	AT4G10040	cytochrome c-2	P00059	CYC_ABUTH Cytochrome c OS=Abutilon theophrasti PE=1 SV=1	B9RFB0	B9RFB0_RICCO Cytochrome c, putative OS=Ricinus communis GN=RCOM_1433300 PE=3 SV=1	osa:4338825	Os05g0420600; hypothetical protein ; K08738 cytochrome c	PF00034.16|Cytochrom_C; PB018316|Pfam-B_18316	IPR002327|Cytochrome c, class IA/ IB; IPR003088|Cytochrome c domain; IPR009056|Cytochrome c-like domain	GO:0009055|electron carrier activity ; GO:0020037|heme binding ; GO:0005506|iron ion binding	16	17	12	30	-0.0628002	-1.3283	0.06	1.73	0	-1
Gh_D09G0819	D09	-	32758632	32762433	AT5G40810	Cytochrome C1 family	P25076	CY11_SOLTU Cytochrome c1-1, heme protein, mitochondrial OS=Solanum tuberosum GN=CYCL PE=2 SV=1	K4C7W7	K4C7W7_SOLLC Uncharacterized protein OS=Solanum lycopersicum GN=Solyc06g067920.2 PE=4 SV=1	vvi:100261810	hypothetical protein LOC100261810 ; K00413 ubiquinol-cytochrome c reductase cytochrome c1 subunit [EC:1.10.2.2]	PF02167.10|Cytochrom_C1	IPR002326|Cytochrome c1; IPR009056|Cytochrome c-like domain	GO:0009055|electron carrier activity ; GO:0020037|heme binding ; GO:0005506|iron ion binding	12	9	18	37	0.405465	-1.01836	0.84	3	0	-1
Gh_D01G1128	D01	-	24089735	24091831	ATMG00180	cytochrome C biogenesis 452	P93286	CCMF_ARATH Putative cytochrome c biogenesis ccmF-like mitochondrial protein OS=Arabidopsis thaliana GN=CCMFC PE=1 SV=2	E8ZCA3	E8ZCA3_BETVM Putative uncharacterized protein orf208 OS=Beta vulgaris subsp. maritima GN=orf208 PE=4 SV=1						61	52	149	44	0.246439	1.75158	0.14	1.41	0	1
Gh_A11G1849	A11	+	42789580	42795366	AT1G02410	cytochrome c oxidase assembly protein CtaG / Cox11 family	Q8GWR0	COX11_ARATH Cytochrome c oxidase assembly protein COX11, mitochondrial OS=Arabidopsis thaliana GN=COX11 PE=2 SV=1	B9GK24	B9GK24_POPTR Predicted protein (Fragment) OS=Populus trichocarpa GN=POPTRDRAFT_179596 PE=3 SV=1	pop:POPTR_179596	hypothetical protein ; K02258 cytochrome c oxidase subunit XI assembly protein	PF04442.9|CtaG_Cox11	IPR007533|Cytochrome c oxidase assembly protein CtaG/Cox11	GO:0005507|copper ion binding	7	12	10	24	-0.723	-1.30625	0.51	1.34	0	-1
Gh_Sca004794G02	scaffold4794	-	39486	40526	AT1G02410	cytochrome c oxidase assembly protein CtaG / Cox11 family	Q8GWR0	COX11_ARATH Cytochrome c oxidase assembly protein COX11, mitochondrial OS=Arabidopsis thaliana GN=COX11 PE=2 SV=1	B9SQ82	B9SQ82_RICCO Cytochrome C oxidase assembly protein cox11, putative OS=Ricinus communis GN=RCOM_1196270 PE=4 SV=1	pop:POPTR_179596	hypothetical protein ; K02258 cytochrome c oxidase subunit XI assembly protein	PF04442.9|CtaG_Cox11	IPR007533|Cytochrome c oxidase assembly protein CtaG/Cox11	GO:0005507|copper ion binding	5	4	5	13	0.37949	-1.47439	0.29	1.76	0	-1
Gh_D09G1650	D09	+	44126740	44131499	AT3G17910	Surfeit locus 1 cytochrome c oxidase biogenesis protein	Q9SE51	SURF1_ARATH Surfeit locus protein 1 OS=Arabidopsis thaliana GN=SURF1 PE=2 SV=1	M5WUQ5	M5WUQ5_PRUPE Uncharacterized protein OS=Prunus persica GN=PRUPE_ppa007867mg PE=4 SV=1			PF02104.10|SURF1	IPR002994|Surfeit locus 1/Shy1	GO:0016020|membrane	6	4	8	18	0.485076	-1.15396	1.05	3.15	0	-1
Gh_D06G0835	D06	-	14968931	14972065	AT5G57815	Cytochrome c oxidase, subunit Vib family protein	Q945L0	CX6B2_ARATH Cytochrome c oxidase subunit 6b-2 OS=Arabidopsis thaliana GN=COX6B-2 PE=2 SV=1	D7MDN5	D7MDN5_ARALL Putative uncharacterized protein OS=Arabidopsis lyrata subsp. lyrata GN=ARALYDRAFT_913717 PE=4 SV=1	ath:AT5G57815	cytochrome c oxidase subunit 6b, putative ; K02267 cytochrome c oxidase subunit VIb [EC:1.9.3.1]	PF02297.12|COX6B	IPR003213|Cytochrome c oxidase, subunit VIb	GO:0004129|cytochrome-c oxidase activity ; GO:0005739|mitochondrion	5	13	6	20	-1.4744	-1.6514	1.04	1.42	0	-1
Gh_A08G1046	A08	-	72768501	72768692	AT5G61310	Cytochrome c oxidase subunit Vc family protein	Q42841	COX5C_HORVU Cytochrome c oxidase subunit 5C OS=Hordeum vulgare GN=COX5C PE=3 SV=3	B9RNE3	B9RNE3_RICCO Cytochrome c oxidase polypeptide Vc, putative OS=Ricinus communis GN=RCOM_0557130 PE=4 SV=1				IPR008432|Cytochrome c oxidase subunit Vc	GO:0005746|mitochondrial respiratory chain	31	18	35	90	0.76512	-1.37417	0.41	1.38	0	-1
Gh_D07G1273	D07	-	19999289	19999480	AT5G61310	Cytochrome c oxidase subunit Vc family protein	Q9SXX7	COX5C_ORYSJ Cytochrome c oxidase subunit 5C OS=Oryza sativa subsp. japonica GN=COX5C PE=2 SV=3	B9RNE3	B9RNE3_RICCO Cytochrome c oxidase polypeptide Vc, putative OS=Ricinus communis GN=RCOM_0557130 PE=4 SV=1				IPR008432|Cytochrome c oxidase subunit Vc	GO:0005746|mitochondrial respiratory chain	22	13	31	68	0.705121	-1.14368	0.78	2.23	0	-1
Gh_A07G0930	A07	+	16922969	16925903	AT5G58970	uncoupling protein 2	Q9ZWG1	PUMP2_ARATH Mitochondrial uncoupling protein 2 OS=Arabidopsis thaliana GN=PUMP2 PE=2 SV=1	R4IQ87	R4IQ87_LITCN Plant uncoupling mitochondrial protein 1 OS=Litchi chinensis GN=PUMP1 PE=2 SV=1	hsa:7350	UCP1; uncoupling protein 1 (mitochondrial, proton carrier) ; K08769 mitochondrial brown fat uncoupling protein 1	PF00153.22|Mito_carr	IPR002030|Mitochondrial brown fat uncoupling protein; IPR018108|Mitochondrial substrate/solute carrier	GO:0031966|mitochondrial membrane ; GO:0006839|mitochondrial transport	20	25	27	59	-0.282768	-1.13873	0.21	1.45	0	-1
Gh_D06G0518	D06	+	7811338	7812069	AT2G07698	ATPase, F1 complex, alpha subunit protein	P18260	ATPAM_HELAN ATP synthase subunit alpha, mitochondrial OS=Helianthus annuus GN=ATPA PE=3 SV=1	R4TIY7	R4TIY7_9ROSI ATPA OS=Hibiscus cannabinus GN=atpA PE=4 SV=1	ath:AT2G07698	ATP synthase alpha chain, mitochondrial, putative ; K02132 F-type H+-transporting ATPase subunit alpha [EC:3.6.3.14]	PF00306.22|ATP-synt_ab_C; PF00006.20|ATP-synt_ab	IPR000194|ATPase, F1/V1/A1 complex, alpha/beta subunit, nucleotide-binding domain; IPR000793|ATPase, F1/V1/A1 complex, alpha/beta subunit, C-terminal; IPR020003|ATPase, alpha/beta subunit, nucleotide-binding domain, active site	GO:0033178|proton-transporting two-sector ATPase complex, catalytic domain ; GO:0015991|ATP hydrolysis coupled proton transport ; GO:0016820|hydrolase activity, acting on acid anhydrides, catalyzing transmembrane movement of substances ; GO:0005524|ATP binding	28	20	120	13	0.457905	3.18606	0.18	1.42	0	1
Gh_A08G0864	A08	+	49014425	49014583	AT2G07698	ATPase, F1 complex, alpha subunit protein	P12862	ATPAM_WHEAT ATP synthase subunit alpha, mitochondrial OS=Triticum aestivum GN=ATPA PE=3 SV=1	B9ETG1	B9ETG1_ORYSJ Uncharacterized protein OS=Oryza sativa subsp. japonica GN=OsJ_00606 PE=4 SV=1	ath:AT2G07698	ATP synthase alpha chain, mitochondrial, putative ; K02132 F-type H+-transporting ATPase subunit alpha [EC:3.6.3.14]	PF02874.18|ATP-synt_ab_N	IPR004100|ATPase, alpha/beta subunit, N-terminal	GO:0046034|ATP metabolic process ; GO:0015992|proton transport	9	7	21	2	0.426084	3.17208	0.29	1.47	0	1
Gh_D09G0251	D09	+	7660924	7661109	AT2G07698	ATPase, F1 complex, alpha subunit protein	P0C522	ATPAM_ORYSJ ATP synthase subunit alpha, mitochondrial OS=Oryza sativa subsp. japonica GN=ATPA PE=1 SV=1	A5JW40	A5JW40_CORAV ATPase alpha subunit (Fragment) OS=Corylus avellana GN=atpA PE=3 SV=1	ath:AT2G07698	ATP synthase alpha chain, mitochondrial, putative ; K02132 F-type H+-transporting ATPase subunit alpha [EC:3.6.3.14]				8	5	20	4	0.693449	2.34455	0.48	1.63	0	1
Gh_D06G1119	D06	+	25903060	25904737	AT2G33040	gamma subunit of Mt ATP synthase	Q96250	ATPG3_ARATH ATP synthase subunit gamma, mitochondrial OS=Arabidopsis thaliana GN=ATPC PE=1 SV=1	Q6UA03	Q6UA03_GOSBA ATP synthase subunit gamma (Fragment) OS=Gossypium barbadense PE=1 SV=1	vvi:100246670	GSVIVT00016204001; hypothetical protein LOC100246670 ; K02136 F-type H+-transporting ATPase subunit gamma [EC:3.6.3.14]	PF00231.14|ATP-synt	IPR000131|ATPase, F1 complex, gamma subunit; IPR023632|ATPase, F1 complex, gamma subunit conserved site	GO:0045261|proton-transporting ATP synthase complex, catalytic core F(1) ; GO:0015986|ATP synthesis coupled proton transport ; GO:0046961|proton-transporting ATPase activity, rotational mechanism ; GO:0046933|proton-transporting ATP synthase activity, rotational mechanism	10	9	12	29	0.196712	-1.32567	0.2	2.14	0	-1
Gh_D03G1233	D03	-	39712464	39712744	AT3G46430				B9SZF4	B9SZF4_RICCO Putative uncharacterized protein OS=Ricinus communis GN=RCOM_0983170 PE=4 SV=1			PB004179|Pfam-B_4179			30	18	28	90	0.730052	-1.6702	0.41	1.54	0	-1
Gh_D05G0950	D05	-	7947018	7947300	AT3G46430				B9SZF4	B9SZF4_RICCO Putative uncharacterized protein OS=Ricinus communis GN=RCOM_0983170 PE=4 SV=1			PB004179|Pfam-B_4179			6	5	7	22	0.476925	-1.66416	0.37	2.07	0	-1
Gh_D01G0352	D01	-	3899436	3901320	AT3G52300	ATP synthase D chain, mitochondrial	Q9FT52	ATP5H_ARATH ATP synthase subunit d, mitochondrial OS=Arabidopsis thaliana GN=At3g52300 PE=1 SV=3	B9SUN3	B9SUN3_RICCO ATP synthase D chain, mitochondrial, putative OS=Ricinus communis GN=RCOM_0713220 PE=4 SV=1	vvi:100241092	GSVIVT00018240001; hypothetical protein LOC100241092 ; K02138 F-type H+-transporting ATPase subunit d [EC:3.6.3.14]	PF05873.7|Mt_ATP-synt_D	IPR008689|ATPase, F0 complex, subunit D, mitochondrial	GO:0015986|ATP synthesis coupled proton transport ; GO:0000276|mitochondrial proton-transporting ATP synthase complex, coupling factor F(o) ; GO:0015078|hydrogen ion transmembrane transporter activity	8	3	9	5	1.20386	0.867137	2.35	2.21	1	0
Gh_A04G0851	A04	+	55625656	55628717	AT5G08670	ATP synthase alpha/beta family protein	Q01859	ATPBM_ORYSJ ATP synthase subunit beta, mitochondrial OS=Oryza sativa subsp. japonica GN=ATPB PE=1 SV=2	C6GFP3	C6GFP3_GOSHI ATP synthase subunit beta OS=Gossypium hirsutum PE=2 SV=1	osa:4324151	Os01g0685800; hypothetical protein ; K02133 F-type H+-transporting ATPase subunit beta [EC:3.6.3.14]	PB000029|Pfam-B_29; PF00306.22|ATP-synt_ab_C; PF11421.3|Synthase_beta; PF00006.20|ATP-synt_ab; PF02874.18|ATP-synt_ab_N	IPR000194|ATPase, F1/V1/A1 complex, alpha/beta subunit, nucleotide-binding domain; IPR000793|ATPase, F1/V1/A1 complex, alpha/beta subunit, C-terminal; IPR003593|AAA+ ATPase domain; IPR004100|ATPase, alpha/beta subunit, N-terminal; IPR005722|ATPase, F1 complex, beta subunit; IPR020003|ATPase, alpha/beta subunit, nucleotide-binding domain, active site; IPR020971|ATP synthase, F1 beta subunit	GO:0046034|ATP metabolic process ; GO:0005524|ATP binding ; GO:0006754|ATP biosynthetic process ; GO:0015986|ATP synthesis coupled proton transport ; GO:0033178|proton-transporting two-sector ATPase complex, catalytic domain ; GO:0015991|ATP hydrolysis coupled proton transport ; GO:0016820|hydrolase activity, acting on acid anhydrides, catalyzing transmembrane movement of substances ; GO:0000166|…	282	131	425	483	1.11298	-0.186409	1.79	0.6	1	0
Gh_D04G1349	D04	+	44049548	44052595	AT5G08680	ATP synthase alpha/beta family protein	P17614	ATPBM_NICPL ATP synthase subunit beta, mitochondrial OS=Nicotiana plumbaginifolia GN=ATPB PE=1 SV=1	C6GFP3	C6GFP3_GOSHI ATP synthase subunit beta OS=Gossypium hirsutum PE=2 SV=1	osa:4324151	Os01g0685800; hypothetical protein ; K02133 F-type H+-transporting ATPase subunit beta [EC:3.6.3.14]	PB000029|Pfam-B_29; PF00306.22|ATP-synt_ab_C; PF11421.3|Synthase_beta; PF00006.20|ATP-synt_ab; PF02874.18|ATP-synt_ab_N	IPR000194|ATPase, F1/V1/A1 complex, alpha/beta subunit, nucleotide-binding domain; IPR000793|ATPase, F1/V1/A1 complex, alpha/beta subunit, C-terminal; IPR003593|AAA+ ATPase domain; IPR004100|ATPase, alpha/beta subunit, N-terminal; IPR005722|ATPase, F1 complex, beta subunit; IPR020003|ATPase, alpha/beta subunit, nucleotide-binding domain, active site; IPR020971|ATP synthase, F1 beta subunit	GO:0046034|ATP metabolic process ; GO:0005524|ATP binding ; GO:0006754|ATP biosynthetic process ; GO:0015986|ATP synthesis coupled proton transport ; GO:0033178|proton-transporting two-sector ATPase complex, catalytic domain ; GO:0015991|ATP hydrolysis coupled proton transport ; GO:0016820|hydrolase activity, acting on acid anhydrides, catalyzing transmembrane movement of substances ; GO:0000166|…	311	155	466	503	1.00284	-0.110798	2.37	0.54	1	0
Gh_A04G0852	A04	-	55636939	55640299	AT5G08680	ATP synthase alpha/beta family protein	P17614	ATPBM_NICPL ATP synthase subunit beta, mitochondrial OS=Nicotiana plumbaginifolia GN=ATPB PE=1 SV=1	C6GFP3	C6GFP3_GOSHI ATP synthase subunit beta OS=Gossypium hirsutum PE=2 SV=1	osa:4324151	Os01g0685800; hypothetical protein ; K02133 F-type H+-transporting ATPase subunit beta [EC:3.6.3.14]	PB000029|Pfam-B_29; PF00306.22|ATP-synt_ab_C; PF11421.3|Synthase_beta; PF00006.20|ATP-synt_ab; PF02874.18|ATP-synt_ab_N	IPR000194|ATPase, F1/V1/A1 complex, alpha/beta subunit, nucleotide-binding domain; IPR000793|ATPase, F1/V1/A1 complex, alpha/beta subunit, C-terminal; IPR003593|AAA+ ATPase domain; IPR004100|ATPase, alpha/beta subunit, N-terminal; IPR005722|ATPase, F1 complex, beta subunit; IPR020003|ATPase, alpha/beta subunit, nucleotide-binding domain, active site; IPR020971|ATP synthase, F1 beta subunit	GO:0046034|ATP metabolic process ; GO:0005524|ATP binding ; GO:0006754|ATP biosynthetic process ; GO:0015986|ATP synthesis coupled proton transport ; GO:0033178|proton-transporting two-sector ATPase complex, catalytic domain ; GO:0015991|ATP hydrolysis coupled proton transport ; GO:0016820|hydrolase activity, acting on acid anhydrides, catalyzing transmembrane movement of substances ; GO:0000166|…	288	127	394	466	1.18191	-0.243303	1.59	0.62	1	0
Gh_D04G1350	D04	-	44062311	44065701	AT5G08680	ATP synthase alpha/beta family protein	P17614	ATPBM_NICPL ATP synthase subunit beta, mitochondrial OS=Nicotiana plumbaginifolia GN=ATPB PE=1 SV=1	C6GFP3	C6GFP3_GOSHI ATP synthase subunit beta OS=Gossypium hirsutum PE=2 SV=1	osa:4324151	Os01g0685800; hypothetical protein ; K02133 F-type H+-transporting ATPase subunit beta [EC:3.6.3.14]	PB000029|Pfam-B_29; PF00306.22|ATP-synt_ab_C; PF11421.3|Synthase_beta; PF00006.20|ATP-synt_ab; PF02874.18|ATP-synt_ab_N	IPR000194|ATPase, F1/V1/A1 complex, alpha/beta subunit, nucleotide-binding domain; IPR000793|ATPase, F1/V1/A1 complex, alpha/beta subunit, C-terminal; IPR003593|AAA+ ATPase domain; IPR004100|ATPase, alpha/beta subunit, N-terminal; IPR005722|ATPase, F1 complex, beta subunit; IPR020003|ATPase, alpha/beta subunit, nucleotide-binding domain, active site; IPR020971|ATP synthase, F1 beta subunit	GO:0046034|ATP metabolic process ; GO:0005524|ATP binding ; GO:0006754|ATP biosynthetic process ; GO:0015986|ATP synthesis coupled proton transport ; GO:0033178|proton-transporting two-sector ATPase complex, catalytic domain ; GO:0015991|ATP hydrolysis coupled proton transport ; GO:0016820|hydrolase activity, acting on acid anhydrides, catalyzing transmembrane movement of substances ; GO:0000166|…	230	114	337	349	1.01693	-0.0502253	1.75	0.13	1	0
Gh_A01G1164	A01	+	55521464	55528279	AT5G08680	ATP synthase alpha/beta family protein	P17614	ATPBM_NICPL ATP synthase subunit beta, mitochondrial OS=Nicotiana plumbaginifolia GN=ATPB PE=1 SV=1	C6GFP3	C6GFP3_GOSHI ATP synthase subunit beta OS=Gossypium hirsutum PE=2 SV=1	osa:4324151	Os01g0685800; hypothetical protein ; K02133 F-type H+-transporting ATPase subunit beta [EC:3.6.3.14]	PB000029|Pfam-B_29; PF11421.3|Synthase_beta; PF14389.1|Lzipper-MIP1; PF00006.20|ATP-synt_ab; PF02874.18|ATP-synt_ab_N	IPR000194|ATPase, F1/V1/A1 complex, alpha/beta subunit, nucleotide-binding domain; IPR003593|AAA+ ATPase domain; IPR004100|ATPase, alpha/beta subunit, N-terminal; IPR005722|ATPase, F1 complex, beta subunit; IPR020003|ATPase, alpha/beta subunit, nucleotide-binding domain, active site; IPR020971|ATP synthase, F1 beta subunit; IPR025757|Ternary complex factor MIP1, leucine-zipper	GO:0046034|ATP metabolic process ; GO:0005524|ATP binding ; GO:0006754|ATP biosynthetic process ; GO:0015986|ATP synthesis coupled proton transport ; GO:0000166|nucleotide binding ; GO:0000275|mitochondrial proton-transporting ATP synthase complex, catalytic core F(1) ; GO:0006200|ATP catabolic process ; GO:0017111|nucleoside-triphosphatase activity; GO:0015992|proton transport ; GO:0046933|proto…	13	111	27	144	-3.06272	-2.40279	1.37	1.72	-1	-1
Gh_D01G1292	D01	+	35630521	35633422	AT5G08690	ATP synthase alpha/beta family protein	P17614	ATPBM_NICPL ATP synthase subunit beta, mitochondrial OS=Nicotiana plumbaginifolia GN=ATPB PE=1 SV=1	C6GFP3	C6GFP3_GOSHI ATP synthase subunit beta OS=Gossypium hirsutum PE=2 SV=1	osa:4324151	Os01g0685800; hypothetical protein ; K02133 F-type H+-transporting ATPase subunit beta [EC:3.6.3.14]	PB000029|Pfam-B_29; PF00306.22|ATP-synt_ab_C; PF11421.3|Synthase_beta; PF00006.20|ATP-synt_ab; PF02874.18|ATP-synt_ab_N	IPR000194|ATPase, F1/V1/A1 complex, alpha/beta subunit, nucleotide-binding domain; IPR000793|ATPase, F1/V1/A1 complex, alpha/beta subunit, C-terminal; IPR004100|ATPase, alpha/beta subunit, N-terminal; IPR005722|ATPase, F1 complex, beta subunit; IPR020003|ATPase, alpha/beta subunit, nucleotide-binding domain, active site; IPR020971|ATP synthase, F1 beta subunit	GO:0046034|ATP metabolic process ; GO:0005524|ATP binding ; GO:0006754|ATP biosynthetic process ; GO:0015986|ATP synthesis coupled proton transport ; GO:0033178|proton-transporting two-sector ATPase complex, catalytic domain ; GO:0015991|ATP hydrolysis coupled proton transport ; GO:0016820|hydrolase activity, acting on acid anhydrides, catalyzing transmembrane movement of substances ; GO:0000275|…	3	7	5	14	-1.38629	-1.63142	0.88	1.57	0	-1
Gh_D08G1553	D08	-	49533621	49535827	AT5G47030	ATPase, F1 complex, delta/epsilon subunit	Q40089	ATP4_IPOBA ATP synthase subunit delta', mitochondrial OS=Ipomoea batatas PE=1 SV=1	C6GFP5	C6GFP5_GOSHI ATP synthase delta subunit 3 OS=Gossypium hirsutum PE=2 SV=1	pop:POPTR_740153	hypothetical protein ; K02134 F-type H+-transporting ATPase subunit delta [EC:3.6.3.14]	PF02823.11|ATP-synt_DE_N	IPR001469|ATPase, F1 complex, delta/epsilon subunit; IPR020546|ATPase, F1 complex, delta/epsilon subunit, N-terminal	GO:0045261|proton-transporting ATP synthase complex, catalytic core F(1) ; GO:0015986|ATP synthesis coupled proton transport ; GO:0046961|proton-transporting ATPase activity, rotational mechanism ; GO:0046933|proton-transporting ATP synthase activity, rotational mechanism	33	16	45	54	1.07974	-0.255867	1.75	0.79	1	0
Gh_A03G1169	A03	-	83703777	83704193	ATMG01190	ATP synthase subunit 1	P18260	ATPAM_HELAN ATP synthase subunit alpha, mitochondrial OS=Helianthus annuus GN=ATPA PE=3 SV=1	M1G679	M1G679_GOSHI ATP synthase subunit alpha (Fragment) OS=Gossypium hirsutum GN=atp1 PE=2 SV=1	ath:AT2G07698	ATP synthase alpha chain, mitochondrial, putative ; K02132 F-type H+-transporting ATPase subunit alpha [EC:3.6.3.14]	PB000029|Pfam-B_29; PF02874.18|ATP-synt_ab_N	IPR004100|ATPase, alpha/beta subunit, N-terminal	GO:0046034|ATP metabolic process ; GO:0015992|proton transport	27	21	73	13	0.35364	2.48083	0.24	1.7	0	1
Gh_D04G1994	scaffold3975_D04	-	23762	24850	ATMG01190	ATP synthase subunit 1	P24459	ATPAM_PHAVU ATP synthase subunit alpha, mitochondrial OS=Phaseolus vulgaris GN=ATPA PE=1 SV=1	Q209R7	Q209R7_SECST AtpA (Fragment) OS=Secale strictum subsp. africanum GN=atpA PE=3 SV=1	ath:AT2G07698	ATP synthase alpha chain, mitochondrial, putative ; K02132 F-type H+-transporting ATPase subunit alpha [EC:3.6.3.14]	PB000029|Pfam-B_29; PF02874.18|ATP-synt_ab_N	IPR004100|ATPase, alpha/beta subunit, N-terminal	GO:0046034|ATP metabolic process ; GO:0015992|proton transport	11	7	36	7	0.677881	2.31718	0.36	1.6	0	1
Gh_A12G1023	A12	-	61846078	61850059	AT1G01220	L-fucokinase/GDP-L-fucose pyrophosphorylase	Q9LNJ9	FKGP_ARATH Bifunctional fucokinase/fucose pyrophosphorylase OS=Arabidopsis thaliana GN=FKGP PE=1 SV=2	M5X7R9	M5X7R9_PRUPE Uncharacterized protein OS=Prunus persica GN=PRUPE_ppa000586mg PE=4 SV=1	xla:100137687	hypothetical protein LOC100137687 ; K05305 fucokinase [EC:2.7.1.52]	PF00288.21|GHMP_kinases_N; PF07959.7|Fucokinase	IPR006204|GHMP kinase N-terminal domain; IPR006206|Mevalonate/galactokinase; IPR012887|L-fucokinase	GO:0008152|metabolic process ; GO:0005524|ATP binding ; GO:0016301|kinase activity ; GO:0016773|phosphotransferase activity, alcohol group as acceptor ; GO:0005737|cytoplasm ; GO:0016772|transferase activity, transferring phosphorus-containing groups	5	9	18	55	-0.826679	-1.62482	0.24	1.49	0	-1
Gh_D08G2686	scaffold4252_D08	-	14677	19950	AT5G52560	UDP-sugar pyrophosphorylase	Q0GZS3	USP_CUCME UDP-sugar pyrophosphorylase OS=Cucumis melo GN=USP PE=1 SV=1	B9S2T0	B9S2T0_RICCO UDP-n-acteylglucosamine pyrophosphorylase, putative OS=Ricinus communis GN=RCOM_0561530 PE=4 SV=1	vvi:100259254	GSVIVT00015459001; hypothetical protein LOC100259254 ; K12447 UDP-sugar pyrophosphorylase [EC:2.7.7.64]	PF01704.13|UDPGP	IPR002618|UTP--glucose-1-phosphate uridylyltransferase	GO:0008152|metabolic process ; GO:0016779|nucleotidyltransferase activity	19	21	28	59	-0.160343	-1.0626	0.2	2.25	0	-1
Gh_A10G0899	A10	-	19726691	19731839	AT5G52560	UDP-sugar pyrophosphorylase	Q0GZS3	USP_CUCME UDP-sugar pyrophosphorylase OS=Cucumis melo GN=USP PE=1 SV=1	B9S2T0	B9S2T0_RICCO UDP-n-acteylglucosamine pyrophosphorylase, putative OS=Ricinus communis GN=RCOM_0561530 PE=4 SV=1	vvi:100259254	GSVIVT00015459001; hypothetical protein LOC100259254 ; K12447 UDP-sugar pyrophosphorylase [EC:2.7.7.64]	PF01704.13|UDPGP	IPR002618|UTP--glucose-1-phosphate uridylyltransferase	GO:0008152|metabolic process ; GO:0016779|nucleotidyltransferase activity	10	9	10	23	0.231805	-1.20391	0.18	1.47	0	-1
Gh_A02G1096	A02	+	56042772	56049789	AT5G52560	UDP-sugar pyrophosphorylase	Q0GZS3	USP_CUCME UDP-sugar pyrophosphorylase OS=Cucumis melo GN=USP PE=1 SV=1	M1C415	M1C415_SOLTU Uncharacterized protein OS=Solanum tuberosum GN=PGSC0003DMG400023024 PE=4 SV=1	vvi:100259254	GSVIVT00015459001; hypothetical protein LOC100259254 ; K12447 UDP-sugar pyrophosphorylase [EC:2.7.7.64]	PF01704.13|UDPGP	IPR002618|UTP--glucose-1-phosphate uridylyltransferase	GO:0008152|metabolic process ; GO:0016779|nucleotidyltransferase activity	5	9	8	22	-0.839751	-1.4604	1.17	2.58	0	-1
Gh_A08G1623	A08	-	95345284	95347616	AT1G12780	UDP-D-glucose/UDP-D-galactose 4-epimerase 1	Q42605	UGE1_ARATH Bifunctional UDP-glucose 4-epimerase and UDP-xylose 4-epimerase 1 OS=Arabidopsis thaliana GN=UGE1 PE=1 SV=2	B9GWF3	B9GWF3_POPTR Predicted protein OS=Populus trichocarpa GN=POPTRDRAFT_817341 PE=2 SV=1	ath:AT1G12780	UGE1; UGE1 (UDP-D-GLUCOSE/UDP-D-GALACTOSE 4-EPIMERASE 1); UDP-glucose 4-epimerase/ protein dimerization ; K01784 UDP-glucose 4-epimerase [EC:5.1.3.2]	PF01370.16|Epimerase; PF13950.1|Epimerase_Csub; PB008977|Pfam-B_8977	IPR001509|NAD-dependent epimerase/dehydratase; IPR005886|UDP-glucose 4-epimerase GalE; IPR025308|UDP-glucose 4-epimerase C-terminal domain	GO:0044237|cellular metabolic process ; GO:0006012|galactose metabolic process ; GO:0003824|catalytic activity ; GO:0003978|UDP-glucose 4-epimerase activity; GO:0050662|coenzyme binding	20	12	19	50	0.760286	-1.36169	0.67	1.81	0	-1
Gh_D08G1936	D08	-	57515697	57518030	AT1G12780	UDP-D-glucose/UDP-D-galactose 4-epimerase 1	Q42605	UGE1_ARATH Bifunctional UDP-glucose 4-epimerase and UDP-xylose 4-epimerase 1 OS=Arabidopsis thaliana GN=UGE1 PE=1 SV=2	B9GWF3	B9GWF3_POPTR Predicted protein OS=Populus trichocarpa GN=POPTRDRAFT_817341 PE=2 SV=1	ath:AT1G12780	UGE1; UGE1 (UDP-D-GLUCOSE/UDP-D-GALACTOSE 4-EPIMERASE 1); UDP-glucose 4-epimerase/ protein dimerization ; K01784 UDP-glucose 4-epimerase [EC:5.1.3.2]	PF01370.16|Epimerase; PF13950.1|Epimerase_Csub; PB008977|Pfam-B_8977	IPR001509|NAD-dependent epimerase/dehydratase; IPR005886|UDP-glucose 4-epimerase GalE; IPR025308|UDP-glucose 4-epimerase C-terminal domain	GO:0044237|cellular metabolic process ; GO:0006012|galactose metabolic process ; GO:0003824|catalytic activity ; GO:0003978|UDP-glucose 4-epimerase activity; GO:0050662|coenzyme binding	13	9	16	38	0.559616	-1.23104	0.47	1.88	0	-1
Gh_A02G0506	A02	-	7363380	7365467	AT1G12780	UDP-D-glucose/UDP-D-galactose 4-epimerase 1	O65780	GALE1_CYATE UDP-glucose 4-epimerase GEPI42 OS=Cyamopsis tetragonoloba PE=2 SV=1	K7MS59	K7MS59_SOYBN Uncharacterized protein OS=Glycine max PE=4 SV=1	ath:AT1G12780	UGE1; UGE1 (UDP-D-GLUCOSE/UDP-D-GALACTOSE 4-EPIMERASE 1); UDP-glucose 4-epimerase/ protein dimerization ; K01784 UDP-glucose 4-epimerase [EC:5.1.3.2]	PF13950.1|Epimerase_Csub; PF14389.1|Lzipper-MIP1	IPR025308|UDP-glucose 4-epimerase C-terminal domain; IPR025757|Ternary complex factor MIP1, leucine-zipper		4	12	3	18	-1.55814	-2.41293	1.06	1.47	0	-1
Gh_A13G2069	scaffold3411_A13	+	84476	84932	AT1G12780	UDP-D-glucose/UDP-D-galactose 4-epimerase 1	O65780	GALE1_CYATE UDP-glucose 4-epimerase GEPI42 OS=Cyamopsis tetragonoloba PE=2 SV=1	K7MS59	K7MS59_SOYBN Uncharacterized protein OS=Glycine max PE=4 SV=1	ath:AT1G12780	UGE1; UGE1 (UDP-D-GLUCOSE/UDP-D-GALACTOSE 4-EPIMERASE 1); UDP-glucose 4-epimerase/ protein dimerization ; K01784 UDP-glucose 4-epimerase [EC:5.1.3.2]				3	9	2	12	-1.7703	-2.31652	1.5	1.83	-1	-1
Gh_A07G1707	A07	+	69504831	69506747	AT1G63180	UDP-D-glucose/UDP-D-galactose 4-epimerase 3	O65780	GALE1_CYATE UDP-glucose 4-epimerase GEPI42 OS=Cyamopsis tetragonoloba PE=2 SV=1	Q6XP48	Q6XP48_SOLTU UDP-Glc-4-epimerase OS=Solanum tuberosum GN=StUGE51 PE=2 SV=1	ath:AT1G63180	UGE3; UGE3 (UDP-D-GLUCOSE/UDP-D-GALACTOSE 4-EPIMERASE 3); UDP-glucose 4-epimerase/ protein dimerization ; K01784 UDP-glucose 4-epimerase [EC:5.1.3.2]	PF13950.1|Epimerase_Csub	IPR005886|UDP-glucose 4-epimerase GalE; IPR025308|UDP-glucose 4-epimerase C-terminal domain	GO:0006012|galactose metabolic process ; GO:0003978|UDP-glucose 4-epimerase activity	3	7	4	19	-1.32914	-2.28819	0.78	1.76	0	-1
Gh_A08G2405	scaffold1984_A08	-	26029	29402	AT4G10960	UDP-D-glucose/UDP-D-galactose 4-epimerase 5	O65781	GALE2_CYATE UDP-glucose 4-epimerase GEPI48 OS=Cyamopsis tetragonoloba PE=2 SV=1	K4CPP0	K4CPP0_SOLLC Uncharacterized protein OS=Solanum lycopersicum GN=Solyc08g082440.2 PE=3 SV=1	ath:AT4G23920	UGE2; UGE2 (UDP-D-GLUCOSE/UDP-D-GALACTOSE 4-EPIMERASE 2); UDP-glucose 4-epimerase/ protein dimerization ; K01784 UDP-glucose 4-epimerase [EC:5.1.3.2]	PF01370.16|Epimerase; PF13950.1|Epimerase_Csub; PB008977|Pfam-B_8977	IPR001509|NAD-dependent epimerase/dehydratase; IPR005886|UDP-glucose 4-epimerase GalE; IPR025308|UDP-glucose 4-epimerase C-terminal domain	GO:0044237|cellular metabolic process ; GO:0006012|galactose metabolic process ; GO:0003824|catalytic activity ; GO:0003978|UDP-glucose 4-epimerase activity; GO:0050662|coenzyme binding	3	4	7	20	-0.310155	-1.51707	0.11	1.49	0	-1
Gh_D02G2411	scaffold3840_D02	+	22147	23589	AT5G15490	UDP-glucose 6-dehydrogenase family protein	Q2QS13	UGDH5_ORYSJ UDP-glucose 6-dehydrogenase 5 OS=Oryza sativa subsp. japonica GN=UGD5 PE=2 SV=1	D2WK24	D2WK24_GOSHI UDP-glucose 6-dehydrogenase OS=Gossypium hirsutum GN=UGD2 PE=2 SV=1	vvi:100261061	hypothetical protein LOC100261061 ; K00012 UDPglucose 6-dehydrogenase [EC:1.1.1.22]	PF00984.14|UDPG_MGDP_dh; PF03721.9|UDPG_MGDP_dh_N; PF03720.10|UDPG_MGDP_dh_C	IPR001732|UDP-glucose/GDP-mannose dehydrogenase, N-terminal; IPR014026|UDP-glucose/GDP-mannose dehydrogenase, dimerisation; IPR014027|UDP-glucose/GDP-mannose dehydrogenase, C-terminal	GO:0016616|oxidoreductase activity, acting on the CH-OH group of donors, NAD or NADP as acceptor ; GO:0051287|NAD binding ; GO:0055114|oxidation-reduction process	39	25	22	51	0.62516	-1.2149	1.62	2.6	0	-1
Gh_Sca192035G01	scaffold192035	-	15	269	AT5G15490	UDP-glucose 6-dehydrogenase family protein	Q9AUV6	UGDH3_ORYSJ UDP-glucose 6-dehydrogenase 3 OS=Oryza sativa subsp. japonica GN=UGD3 PE=2 SV=1	D2WK24	D2WK24_GOSHI UDP-glucose 6-dehydrogenase OS=Gossypium hirsutum GN=UGD2 PE=2 SV=1	vvi:100264653	hypothetical protein LOC100264653 ; K00012 UDPglucose 6-dehydrogenase [EC:1.1.1.22]	PF03720.10|UDPG_MGDP_dh_C	IPR014027|UDP-glucose/GDP-mannose dehydrogenase, C-terminal	GO:0016616|oxidoreductase activity, acting on the CH-OH group of donors, NAD or NADP as acceptor ; GO:0051287|NAD binding ; GO:0055114|oxidation-reduction process	9	8	5	15	0.154152	-1.7148	0.11	1.33	0	-1
Gh_D07G1467	D07	-	25168767	25170080	AT4G00110	UDP-D-glucuronate 4-epimerase 3	O81312	GAE3_ARATH UDP-glucuronate 4-epimerase 3 OS=Arabidopsis thaliana GN=GAE3 PE=2 SV=1	M5XCI5	M5XCI5_PRUPE Uncharacterized protein OS=Prunus persica GN=PRUPE_ppa005953mg PE=4 SV=1	ath:AT4G00110	GAE3; GAE3 (UDP-D-GLUCURONATE 4-EPIMERASE 3); catalytic ; K08679 UDP-glucuronate 4-epimerase [EC:5.1.3.6]	PF01370.16|Epimerase	IPR001509|NAD-dependent epimerase/dehydratase; IPR008089|Nucleotide sugar epimerase	GO:0005975|carbohydrate metabolic process ; GO:0044237|cellular metabolic process ; GO:0016857|racemase and epimerase activity, acting on carbohydrates and derivatives ; GO:0003824|catalytic activity ; GO:0050662|coenzyme binding	15	7	31	28	1.04835	0.175353	1.48	0.53	1	0
Gh_D08G1869	D08	+	56351467	56352768	AT4G12250	UDP-D-glucuronate 4-epimerase 5	O81312	GAE3_ARATH UDP-glucuronate 4-epimerase 3 OS=Arabidopsis thaliana GN=GAE3 PE=2 SV=1	M4EWD2	M4EWD2_BRARP Uncharacterized protein OS=Brassica rapa subsp. pekinensis GN=Bra033116 PE=4 SV=1	ath:AT4G00110	GAE3; GAE3 (UDP-D-GLUCURONATE 4-EPIMERASE 3); catalytic ; K08679 UDP-glucuronate 4-epimerase [EC:5.1.3.6]	PF01370.16|Epimerase	IPR001509|NAD-dependent epimerase/dehydratase; IPR008089|Nucleotide sugar epimerase	GO:0005975|carbohydrate metabolic process ; GO:0044237|cellular metabolic process ; GO:0016857|racemase and epimerase activity, acting on carbohydrates and derivatives ; GO:0003824|catalytic activity ; GO:0050662|coenzyme binding	49	25	63	54	1.0125	0.218408	3.88	2.07	1	0
Gh_D04G0825	D04	+	20679620	20680645	AT4G30440	UDP-D-glucuronate 4-epimerase 1	Q9M0B6	GAE1_ARATH UDP-glucuronate 4-epimerase 1 OS=Arabidopsis thaliana GN=GAE1 PE=1 SV=1	D2D334	D2D334_GOSHI UDP-D-glucuronic acid 4-epimerase OS=Gossypium hirsutum PE=2 SV=1	osa:4330975	Os02g0791500; hypothetical protein ; K01795	PF01370.16|Epimerase	IPR001509|NAD-dependent epimerase/dehydratase	GO:0044237|cellular metabolic process ; GO:0003824|catalytic activity ; GO:0050662|coenzyme binding	104	40	148	154	1.36002	-0.0653499	1.36	0.1	1	0
Gh_A08G2065	A08	+	101948340	101949614	AT1G78570	rhamnose biosynthesis 1	Q9SYM5	RHM1_ARATH Probable rhamnose biosynthetic enzyme 1 OS=Arabidopsis thaliana GN=RHM1 PE=1 SV=1	D2D336	D2D336_GOSHI Rhamnose synthase OS=Gossypium hirsutum PE=2 SV=1	vvi:100260586	GSVIVT00027921001; hypothetical protein LOC100260586 ; K12450 UDP-glucose 4,6-dehydratase [EC:4.2.1.76]	PF04321.12|RmlD_sub_bind	IPR005913|dTDP-4-dehydrorhamnose reductase	GO:0045226|extracellular polysaccharide biosynthetic process ; GO:0008831|dTDP-4-dehydrorhamnose reductase activity	8	10	2	7	-0.213574	-1.51958	0.39	1.52	0	-1
Gh_A07G1396	A07	+	38033421	38034894	AT3G54690	Sugar isomerase (SIS) family protein	Q9M1T1	SETH3_ARATH Probable arabinose 5-phosphate isomerase OS=Arabidopsis thaliana GN=SETH3 PE=2 SV=1	A9PBR5	A9PBR5_POPTR Predicted protein OS=Populus trichocarpa GN=POPTRDRAFT_816080 PE=2 SV=1	pop:POPTR_816080	hypothetical protein ; K06041 arabinose-5-phosphate isomerase [EC:5.3.1.13]	PF00571.23|CBS; PF01380.17|SIS	IPR000644|CBS domain; IPR001347|Sugar isomerase (SIS)	GO:0030246|carbohydrate binding ; GO:0005515|protein binding ; GO:0030554|adenyl nucleotide binding; GO:0005975|carbohydrate metabolic process	55	26	51	52	1.08636	-0.0308772	2.13	0.07	1	0
Gh_D07G1500	D07	+	26616541	26618053	AT3G54690	Sugar isomerase (SIS) family protein	Q9M1T1	SETH3_ARATH Probable arabinose 5-phosphate isomerase OS=Arabidopsis thaliana GN=SETH3 PE=2 SV=1	A9PBR5	A9PBR5_POPTR Predicted protein OS=Populus trichocarpa GN=POPTRDRAFT_816080 PE=2 SV=1	pop:POPTR_816080	hypothetical protein ; K06041 arabinose-5-phosphate isomerase [EC:5.3.1.13]	PF00571.23|CBS; PF01380.17|SIS	IPR000644|CBS domain; IPR001347|Sugar isomerase (SIS)	GO:0030246|carbohydrate binding ; GO:0005515|protein binding ; GO:0030554|adenyl nucleotide binding; GO:0005975|carbohydrate metabolic process	48	22	49	43	1.12932	0.20554	2.04	0.52	1	0
Gh_D08G0852	D08	+	15267782	15277462	AT1G79500	Aldolase-type TIM barrel family protein	Q9AV97	KDSA1_ARATH 2-dehydro-3-deoxyphosphooctonate aldolase 1 OS=Arabidopsis thaliana GN=KDSA1 PE=1 SV=2	K7MUK5	K7MUK5_SOYBN Uncharacterized protein OS=Glycine max PE=3 SV=1	pop:POPTR_818614	hypothetical protein ; K01627 2-dehydro-3-deoxyphosphooctonate aldolase (KDO 8-P synthase) [EC:2.5.1.55]	PF00793.15|DAHP_synth_1	IPR006218|DAHP synthetase I/KDSA; IPR006269|3-deoxy-8-phosphooctulonate synthase	GO:0009058|biosynthetic process ; GO:0008152|metabolic process ; GO:0008676|3-deoxy-8-phosphooctulonate synthase activity; GO:0005737|cytoplasm	13	12	13	29	0.0391691	-1.17091	0.08	3.04	0	-1
Gh_D11G1675	D11	-	18127088	18129882	AT1G67070	Mannose-6-phosphate isomerase, type I	Q9FZH5	MPI2_ARATH Mannose-6-phosphate isomerase 2 OS=Arabidopsis thaliana GN=PMI2 PE=1 SV=1	B9H303	B9H303_POPTR Mannose-6-phosphate isomerase OS=Populus trichocarpa GN=POPTRDRAFT_758948 PE=3 SV=1	pop:POPTR_758948	hypothetical protein ; K01809 mannose-6-phosphate isomerase [EC:5.3.1.8]	PF01238.16|PMI_typeI	IPR001250|Mannose-6-phosphate isomerase, type I; IPR016305|Mannose-6-phosphate isomerase; IPR018050|Phosphomannose isomerase, type I, conserved site	GO:0008270|zinc ion binding ; GO:0005975|carbohydrate metabolic process ; GO:0004476|mannose-6-phosphate isomerase activity ; GO:0009298|GDP-mannose biosynthetic process	11	12	30	63	-0.141079	-1.06981	0.1	2.14	0	-1
Gh_A07G2229	scaffold1845_A07	+	317012	322940	AT3G07330	Cellulose-synthase-like C6	Q9SRT3	CSLC6_ARATH Probable xyloglucan glycosyltransferase 6 OS=Arabidopsis thaliana GN=CSLC6 PE=1 SV=1	R0I117	R0I117_9BRAS Uncharacterized protein OS=Capsella rubella GN=CARUB_v10013120mg PE=4 SV=1			PB005365|Pfam-B_5365; PB012062|Pfam-B_12062; PB004906|Pfam-B_4906; PF13641.1|Glyco_tranf_2_3; PB009408|Pfam-B_9408; PB015575|Pfam-B_15575; PB006231|Pfam-B_6231; PB010232|Pfam-B_10232			20	28	24	57	-0.433038	-1.25349	0.78	2.49	0	-1
Gh_A09G0244	A09	-	7558276	7560519	AT3G28180	Cellulose-synthase-like C4	Q9LJP4	CSLC4_ARATH Xyloglucan glycosyltransferase 4 OS=Arabidopsis thaliana GN=CSLC4 PE=1 SV=1	B9RUD8	B9RUD8_RICCO Transferase, transferring glycosyl groups, putative OS=Ricinus communis GN=RCOM_0851910 PE=4 SV=1	afm:AFUA_3G03620	glycosyl transferase (EC:2.4.1.-); K00754	PF13641.1|Glyco_tranf_2_3; PB009408|Pfam-B_9408; PB005365|Pfam-B_5365; PB006231|Pfam-B_6231; PB015575|Pfam-B_15575; PB012062|Pfam-B_12062; PB010232|Pfam-B_10232			133	64	23	25	1.05373	-0.0714386	2.11	0.05	1	0
Gh_D05G2045	D05	-	18893763	18896280	AT4G07960	Cellulose-synthase-like C12	Q9ZQB9	CSLCC_ARATH Probable xyloglucan glycosyltransferase 12 OS=Arabidopsis thaliana GN=CSLC12 PE=1 SV=1	L0ASJ1	L0ASJ1_POPTO Cellulose synthase-like protein OS=Populus tomentosa PE=4 SV=1	afm:AFUA_3G03620	glycosyl transferase (EC:2.4.1.-); K00754	PB005365|Pfam-B_5365; PB012062|Pfam-B_12062; PB004906|Pfam-B_4906; PF13641.1|Glyco_tranf_2_3; PB009408|Pfam-B_9408; PB015575|Pfam-B_15575; PB006231|Pfam-B_6231; PB010232|Pfam-B_10232			61	23	96	114	1.40247	-0.255396	1.44	0.59	1	0
Gh_D07G2414	scaffold4174_D07	+	9445	12414	AT5G22130	mannosyltransferase family protein	Q500W7	PIGM_ARATH GPI mannosyltransferase 1 OS=Arabidopsis thaliana GN=PIGM PE=2 SV=1	Q0WVX1	Q0WVX1_ARATH At5g22130 OS=Arabidopsis thaliana GN=At5g22130 PE=2 SV=1	ath:AT5G22130	PNT1; PNT1 (PEANUT 1); mannosyltransferase/ transferase, transferring glycosyl groups ; K05284 phosphatidylinositol glycan, class M [EC:2.4.1.-]	PB012530|Pfam-B_12530; PB006893|Pfam-B_6893; PF05007.8|Mannosyl_trans; PB002700|Pfam-B_2700	IPR007704|Mannosyltransferase, DXD	GO:0006506|GPI anchor biosynthetic process ; GO:0016758|transferase activity, transferring hexosyl groups ; GO:0016021|integral to membrane ; GO:0005789|endoplasmic reticulum membrane	10	12	19	42	-0.226771	-1.14	0.22	2.22	0	-1
Gh_A09G0876	A09	+	56613544	56617109	AT5G22740	cellulose synthase-like A02	Q9FNI7	CSLA2_ARATH Glucomannan 4-beta-mannosyltransferase 2 OS=Arabidopsis thaliana GN=CSLA2 PE=2 SV=1	B9HQL2	B9HQL2_POPTR Predicted protein OS=Populus trichocarpa GN=POPTRDRAFT_556940 PE=4 SV=1	afm:AFUA_3G03620	glycosyl transferase (EC:2.4.1.-); K00754	PF13641.1|Glyco_tranf_2_3; PB009408|Pfam-B_9408; PB006231|Pfam-B_6231; PB015575|Pfam-B_15575; PB012062|Pfam-B_12062			129	62	23	37	1.05729	-0.703957	2.28	0.78	1	0
Gh_D09G2167	D09	+	48835708	48839773	AT1G55850	cellulose synthase like E1	Q8VYR4	CSLG2_ARATH Cellulose synthase-like protein G2 OS=Arabidopsis thaliana GN=CSLG2 PE=2 SV=1	F6H8G9	F6H8G9_VITVI Putative uncharacterized protein OS=Vitis vinifera GN=VIT_05s0049g00010 PE=4 SV=1	ath:AT4G18780	CESA8; CESA8 (CELLULOSE SYNTHASE 8); cellulose synthase/ transferase, transferring glycosyl groups ; K10999 cellulose synthase A [EC:2.4.1.12]	PF03552.9|Cellulose_synt	IPR005150|Cellulose synthase	GO:0016760|cellulose synthase (UDP-forming) activity ; GO:0016020|membrane ; GO:0030244|cellulose biosynthetic process	76	24	7	6	1.6714	0.0689855	2.72	0.03	1	0
Gh_A12G1874	A12	-	81302624	81306420	AT3G03050	cellulose synthase-like D3	Q9M9M4	CSLD3_ARATH Cellulose synthase-like protein D3 OS=Arabidopsis thaliana GN=CSLD3 PE=1 SV=1	M5WZC5	M5WZC5_PRUPE Uncharacterized protein OS=Prunus persica GN=PRUPE_ppa021772mg PE=4 SV=1	osa:4347093	Os09g0422500; hypothetical protein ; K10999 cellulose synthase A [EC:2.4.1.12]	PF14570.1|zf-RING_4; PF03552.9|Cellulose_synt	IPR005150|Cellulose synthase	GO:0016760|cellulose synthase (UDP-forming) activity ; GO:0016020|membrane ; GO:0030244|cellulose biosynthetic process	135	55	142	159	1.31255	-0.158281	1.4	0.23	1	0
Gh_A02G1345	A02	-	77847136	77851019	AT3G03050	cellulose synthase-like D3	Q9M9M4	CSLD3_ARATH Cellulose synthase-like protein D3 OS=Arabidopsis thaliana GN=CSLD3 PE=1 SV=1	K7K5F4	K7K5F4_SOYBN Uncharacterized protein OS=Glycine max PE=4 SV=1	osa:4347093	Os09g0422500; hypothetical protein ; K10999 cellulose synthase A [EC:2.4.1.12]	PF14570.1|zf-RING_4; PF03552.9|Cellulose_synt	IPR005150|Cellulose synthase	GO:0016760|cellulose synthase (UDP-forming) activity ; GO:0016020|membrane ; GO:0030244|cellulose biosynthetic process	113	49	38	83	1.21482	-1.12093	2.02	1.64	1	-1
Gh_D03G0480	D03	-	8010801	8014682	AT3G03050	cellulose synthase-like D3	Q9M9M4	CSLD3_ARATH Cellulose synthase-like protein D3 OS=Arabidopsis thaliana GN=CSLD3 PE=1 SV=1	K7K5F4	K7K5F4_SOYBN Uncharacterized protein OS=Glycine max PE=4 SV=1	osa:4347093	Os09g0422500; hypothetical protein ; K10999 cellulose synthase A [EC:2.4.1.12]	PF14570.1|zf-RING_4; PF03552.9|Cellulose_synt	IPR005150|Cellulose synthase	GO:0016760|cellulose synthase (UDP-forming) activity ; GO:0016020|membrane ; GO:0030244|cellulose biosynthetic process	82	38	40	78	1.1127	-0.98083	1.62	1.48	1	0
Gh_D08G2355	D08	+	63272823	63276388	AT3G03050	cellulose synthase-like D3	Q9M9M4	CSLD3_ARATH Cellulose synthase-like protein D3 OS=Arabidopsis thaliana GN=CSLD3 PE=1 SV=1	F6HEF7	F6HEF7_VITVI Putative uncharacterized protein OS=Vitis vinifera GN=VIT_16s0039g02020 PE=2 SV=1	osa:4347093	Os09g0422500; hypothetical protein ; K10999 cellulose synthase A [EC:2.4.1.12]	PF14570.1|zf-RING_4; PF03552.9|Cellulose_synt	IPR005150|Cellulose synthase	GO:0016760|cellulose synthase (UDP-forming) activity ; GO:0016020|membrane ; GO:0030244|cellulose biosynthetic process	55	27	31	45	1.01082	-0.534083	2.13	1.28	1	0
Gh_D05G1460	D05	+	13002023	13006412	AT4G18780	cellulose synthase family protein	Q8LPK5	CESA8_ARATH Cellulose synthase A catalytic subunit 8 [UDP-forming] OS=Arabidopsis thaliana GN=CESA8 PE=1 SV=1	B2ZAS9	B2ZAS9_9ROSI Cellulose synthase OS=Gossypioides kirkii PE=4 SV=1	ath:AT4G18780	CESA8; CESA8 (CELLULOSE SYNTHASE 8); cellulose synthase/ transferase, transferring glycosyl groups ; K10999 cellulose synthase A [EC:2.4.1.12]	PF14569.1|zf-UDP; PF03552.9|Cellulose_synt	IPR005150|Cellulose synthase; IPR027934|Cellulose synthase, RING-type zinc finger	GO:0016760|cellulose synthase (UDP-forming) activity ; GO:0016020|membrane ; GO:0030244|cellulose biosynthetic process	6	10	17	68	-0.784955	-2.03425	0.27	1.88	0	-1
Gh_A09G1963	A09	+	72721758	72727357	AT4G23990	cellulose synthase like G3	Q0WVN5	CSLG3_ARATH Cellulose synthase-like protein G3 OS=Arabidopsis thaliana GN=CSLG3 PE=2 SV=2	B9STK2	B9STK2_RICCO Cellulose synthase, putative OS=Ricinus communis GN=RCOM_0492590 PE=4 SV=1	ath:AT5G17420	IRX3; IRX3 (IRREGULAR XYLEM 3, MURUS 10); cellulose synthase ; K10999 cellulose synthase A [EC:2.4.1.12]	PF03552.9|Cellulose_synt	IPR005150|Cellulose synthase	GO:0016760|cellulose synthase (UDP-forming) activity ; GO:0016020|membrane ; GO:0030244|cellulose biosynthetic process	3	2	3	34	0.405466	-3.46804	0.08	1.46	0	-1
Gh_A09G1964	A09	+	72738789	72743401	AT4G24000	cellulose synthase like G2	Q8VYR4	CSLG2_ARATH Cellulose synthase-like protein G2 OS=Arabidopsis thaliana GN=CSLG2 PE=2 SV=1	F6H8G9	F6H8G9_VITVI Putative uncharacterized protein OS=Vitis vinifera GN=VIT_05s0049g00010 PE=4 SV=1	osa:4347093	Os09g0422500; hypothetical protein ; K10999 cellulose synthase A [EC:2.4.1.12]	PF03552.9|Cellulose_synt	IPR005150|Cellulose synthase	GO:0016760|cellulose synthase (UDP-forming) activity ; GO:0016020|membrane ; GO:0030244|cellulose biosynthetic process	19	6	2	3	1.63142	-0.539011	2.03	0.28	1	0
Gh_D08G0582	D08	-	6949114	6959824	AT5G05170	Cellulose synthase family protein	Q941L0	CESA3_ARATH Cellulose synthase A catalytic subunit 3 [UDP-forming] OS=Arabidopsis thaliana GN=CESA3 PE=1 SV=2	J9QV56	J9QV56_9ROSI Cellulose synthase (Fragment) OS=Populus fremontii GN=CesA1A PE=4 SV=1	ath:AT5G05170	CESA3; CESA3 (CELLULOSE SYNTHASE 3); cellulose synthase/ transferase, transferring glycosyl groups ; K10999 cellulose synthase A [EC:2.4.1.12]	PF03552.9|Cellulose_synt	IPR005150|Cellulose synthase	GO:0016760|cellulose synthase (UDP-forming) activity ; GO:0016020|membrane ; GO:0030244|cellulose biosynthetic process	3	10	5	16	-1.64859	-1.71379	1.12	1.61	0	-1
Gh_D12G0885	D12	+	30076019	30082836	AT5G64740	cellulose synthase 6	Q94JQ6	CESA6_ARATH Cellulose synthase A catalytic subunit 6 [UDP-forming] OS=Arabidopsis thaliana GN=CESA6 PE=1 SV=2	G7IBY3	G7IBY3_MEDTR Cellulose synthase OS=Medicago truncatula GN=MTR_1g098550 PE=4 SV=1	ath:AT5G64740	CESA6; CESA6 (CELLULOSE SYNTHASE 6); transferase, transferring glycosyl groups ; K10999 cellulose synthase A [EC:2.4.1.12]	PF14569.1|zf-UDP; PF03552.9|Cellulose_synt	IPR001841|Zinc finger, RING-type; IPR005150|Cellulose synthase; IPR027934|Cellulose synthase, RING-type zinc finger	GO:0016760|cellulose synthase (UDP-forming) activity ; GO:0016020|membrane ; GO:0005515|protein binding ; GO:0030244|cellulose biosynthetic process ; GO:0008270|zinc ion binding	7	10	4	9	-0.522189	-1.20397	0.8	1.36	0	-1
Gh_D02G0577	D02	-	7758686	7761160	AT4G16120	COBRA-like protein-7 precursor	Q8GZ17	COBL7_ARATH COBRA-like protein 7 OS=Arabidopsis thaliana GN=COBL7 PE=1 SV=2	A9PEE4	A9PEE4_POPTR Predicted protein OS=Populus trichocarpa GN=POPTRDRAFT_821674 PE=2 SV=1			PB000893|Pfam-B_893; PB009192|Pfam-B_9192; PF04833.10|COBRA	IPR006918|COBRA, plant	GO:0010215|cellulose microfibril organization; GO:0031225|anchored to membrane; GO:0016049|cell growth	131	63	125	148	1.05754	-0.246727	2.76	1.16	1	0
Gh_A02G0513	A02	-	7572905	7575380	AT4G16120	COBRA-like protein-7 precursor	Q8GZ17	COBL7_ARATH COBRA-like protein 7 OS=Arabidopsis thaliana GN=COBL7 PE=1 SV=2	A9PEE4	A9PEE4_POPTR Predicted protein OS=Populus trichocarpa GN=POPTRDRAFT_821674 PE=2 SV=1			PB000893|Pfam-B_893; PB009192|Pfam-B_9192; PF04833.10|COBRA	IPR006918|COBRA, plant	GO:0010215|cellulose microfibril organization; GO:0031225|anchored to membrane; GO:0016049|cell growth	118	55	112	148	1.09964	-0.402141	2.27	1.39	1	0
Gh_D12G1819	D12	-	50697965	50699846	AT5G15630	COBRA-like extracellular glycosyl-phosphatidyl inositol-anchored protein family	Q9LFW3	COBL4_ARATH COBRA-like protein 4 OS=Arabidopsis thaliana GN=COBL4 PE=2 SV=2	A9PI47	A9PI47_POPTR Putative uncharacterized protein OS=Populus trichocarpa PE=2 SV=1			PB009192|Pfam-B_9192; PF04833.10|COBRA	IPR006918|COBRA, plant	GO:0010215|cellulose microfibril organization; GO:0031225|anchored to membrane; GO:0016049|cell growth	1	5	14	30	-1.8459	-1.13989	0.55	1.74	0	-1
Gh_D05G1880	D05	+	17185585	17186649	AT1G19300	Nucleotide-diphospho-sugar transferases superfamily protein	Q9LN68	GATL1_ARATH Probable galacturonosyltransferase-like 1 OS=Arabidopsis thaliana GN=GATL1 PE=2 SV=1	D0ECQ7	D0ECQ7_POPDE Glycosyltransferase family GT8 protein OS=Populus deltoides GN=GATL1.2 PE=2 SV=1	dre:492466	glt8d1; glycosyltransferase 8 domain containing 1 (EC:2.4.1.-); K00754	PF01501.15|Glyco_transf_8	IPR002495|Glycosyl transferase, family 8	GO:0016757|transferase activity, transferring glycosyl groups	3	1	24	57	1.38629	-1.21935	0.28	2.44	0	-1
Gh_A05G1690	A05	+	17583763	17584830	AT1G19300	Nucleotide-diphospho-sugar transferases superfamily protein	Q9LN68	GATL1_ARATH Probable galacturonosyltransferase-like 1 OS=Arabidopsis thaliana GN=GATL1 PE=2 SV=1	D0ECQ7	D0ECQ7_POPDE Glycosyltransferase family GT8 protein OS=Populus deltoides GN=GATL1.2 PE=2 SV=1	dre:492466	glt8d1; glycosyltransferase 8 domain containing 1 (EC:2.4.1.-); K00754	PF01501.15|Glyco_transf_8	IPR002495|Glycosyl transferase, family 8	GO:0016757|transferase activity, transferring glycosyl groups	2	1	19	51	0.916288	-1.38629	0.12	1.91	0	-1
Gh_D05G2480	D05	+	24967340	24968419	AT1G19300	Nucleotide-diphospho-sugar transferases superfamily protein	Q9LN68	GATL1_ARATH Probable galacturonosyltransferase-like 1 OS=Arabidopsis thaliana GN=GATL1 PE=2 SV=1	D0ECQ6	D0ECQ6_POPDE Glycosyltransferase family GT8 protein OS=Populus deltoides GN=GATL1.1 PE=2 SV=1	dre:492466	glt8d1; glycosyltransferase 8 domain containing 1 (EC:2.4.1.-); K00754	PF01501.15|Glyco_transf_8	IPR002495|Glycosyl transferase, family 8	GO:0016757|transferase activity, transferring glycosyl groups	1	2	19	41	-0.916288	-1.09861	0.14	1.76	0	-1
Gh_A05G2220	A05	+	25686186	25687265	AT1G19300	Nucleotide-diphospho-sugar transferases superfamily protein	Q9LN68	GATL1_ARATH Probable galacturonosyltransferase-like 1 OS=Arabidopsis thaliana GN=GATL1 PE=2 SV=1	D0ECQ6	D0ECQ6_POPDE Glycosyltransferase family GT8 protein OS=Populus deltoides GN=GATL1.1 PE=2 SV=1	dre:492466	glt8d1; glycosyltransferase 8 domain containing 1 (EC:2.4.1.-); K00754	PF01501.15|Glyco_transf_8	IPR002495|Glycosyl transferase, family 8	GO:0016757|transferase activity, transferring glycosyl groups	1	2	18	37	-0.510823	-1.041	0.1	1.86	0	-1
Gh_A05G2313	A05	-	27650891	27654803	AT1G77130	plant glycogenin-like starch initiation protein 2	Q8W4A7	GUX3_ARATH Putative UDP-glucuronate:xylan alpha-glucuronosyltransferase 3 OS=Arabidopsis thaliana GN=GUX3 PE=2 SV=1	M5VIJ3	M5VIJ3_PRUPE Uncharacterized protein OS=Prunus persica GN=PRUPE_ppa002697mg PE=4 SV=1	bfo:BRAFLDRAFT_257976	hypothetical protein ; K00750 glycogenin glucosyltransferase [EC:2.4.1.186]	PF01501.15|Glyco_transf_8; PB018911|Pfam-B_18911; PB010331|Pfam-B_10331	IPR002495|Glycosyl transferase, family 8	GO:0016757|transferase activity, transferring glycosyl groups	36	33	21	43	0.160709	-1.02115	0.24	1.51	0	-1
Gh_D13G1495	D13	+	46583202	46585967	AT5G54690	galacturonosyltransferase 12	Q9FH36	GAUTC_ARATH Probable galacturonosyltransferase 12 OS=Arabidopsis thaliana GN=GAUT12 PE=2 SV=1	M5X0L1	M5X0L1_PRUPE Uncharacterized protein OS=Prunus persica GN=PRUPE_ppa004043mg PE=4 SV=1	ath:AT3G02350	GAUT9; GAUT9 (Galacturonosyltransferase 9); polygalacturonate 4-alpha-galacturonosyltransferase/ transferase, transferring glycosyl groups / transferase, transferring hexosyl groups ; K00754	PB004140|Pfam-B_4140; PF01501.15|Glyco_transf_8; PB012772|Pfam-B_12772	IPR002495|Glycosyl transferase, family 8	GO:0016757|transferase activity, transferring glycosyl groups	3	2	32	103	0.287681	-1.70257	0.04	2.48	0	-1
Gh_A13G1199	A13	+	65040755	65043553	AT5G54690	galacturonosyltransferase 12	Q9FH36	GAUTC_ARATH Probable galacturonosyltransferase 12 OS=Arabidopsis thaliana GN=GAUT12 PE=2 SV=1	M5X0L1	M5X0L1_PRUPE Uncharacterized protein OS=Prunus persica GN=PRUPE_ppa004043mg PE=4 SV=1	ath:AT3G02350	GAUT9; GAUT9 (Galacturonosyltransferase 9); polygalacturonate 4-alpha-galacturonosyltransferase/ transferase, transferring glycosyl groups / transferase, transferring hexosyl groups ; K00754	PF01501.15|Glyco_transf_8; PB012772|Pfam-B_12772	IPR002495|Glycosyl transferase, family 8	GO:0016757|transferase activity, transferring glycosyl groups	3	3	30	88	0.287682	-1.55717	0.07	2.69	0	-1
Gh_A01G0568	A01	-	9996974	9999674	AT5G54690	galacturonosyltransferase 12	Q9FH36	GAUTC_ARATH Probable galacturonosyltransferase 12 OS=Arabidopsis thaliana GN=GAUT12 PE=2 SV=1	M5X0L1	M5X0L1_PRUPE Uncharacterized protein OS=Prunus persica GN=PRUPE_ppa004043mg PE=4 SV=1	ath:AT3G02350	GAUT9; GAUT9 (Galacturonosyltransferase 9); polygalacturonate 4-alpha-galacturonosyltransferase/ transferase, transferring glycosyl groups / transferase, transferring hexosyl groups ; K00754	PF01501.15|Glyco_transf_8; PB012772|Pfam-B_12772	IPR002495|Glycosyl transferase, family 8	GO:0016757|transferase activity, transferring glycosyl groups	2	2	29	95	0	-1.70265	0	3.6	0	-1
Gh_D01G0577	D01	-	7904964	7913279	AT5G54690	galacturonosyltransferase 12	Q9FH36	GAUTC_ARATH Probable galacturonosyltransferase 12 OS=Arabidopsis thaliana GN=GAUT12 PE=2 SV=1	M5X0L1	M5X0L1_PRUPE Uncharacterized protein OS=Prunus persica GN=PRUPE_ppa004043mg PE=4 SV=1	ath:AT3G02350	GAUT9; GAUT9 (Galacturonosyltransferase 9); polygalacturonate 4-alpha-galacturonosyltransferase/ transferase, transferring glycosyl groups / transferase, transferring hexosyl groups ; K00754	PF01501.15|Glyco_transf_8; PB012772|Pfam-B_12772	IPR002495|Glycosyl transferase, family 8	GO:0016757|transferase activity, transferring glycosyl groups	1	2	24	67	-1.25276	-1.47058	0.77	4.44	0	-1
Gh_Sca063168G01	scaffold63168	-	10	621	AT5G54690	galacturonosyltransferase 12	Q9FH36	GAUTC_ARATH Probable galacturonosyltransferase 12 OS=Arabidopsis thaliana GN=GAUT12 PE=2 SV=1	M5X0L1	M5X0L1_PRUPE Uncharacterized protein OS=Prunus persica GN=PRUPE_ppa004043mg PE=4 SV=1	ath:AT3G02350	GAUT9; GAUT9 (Galacturonosyltransferase 9); polygalacturonate 4-alpha-galacturonosyltransferase/ transferase, transferring glycosyl groups / transferase, transferring hexosyl groups ; K00754	PB012772|Pfam-B_12772			1	3	8	28	-1.09865	-1.87983	0.2	1.59	0	-1
Gh_D12G1409	D12	+	43357297	43358031	AT1G03870	FASCICLIN-like arabinoogalactan 9	Q9ZWA8	FLA9_ARATH Fasciclin-like arabinogalactan protein 9 OS=Arabidopsis thaliana GN=FLA9 PE=1 SV=1	B1NHU5	B1NHU5_GOSHI Fasciclin-like arabinogalactan protein 1 OS=Gossypium hirsutum PE=2 SV=1			PF02469.17|Fasciclin	IPR000782|FAS1 domain		390	75	3181	2649	2.37836	0.264172	1.6	1.79	1	0
Gh_A12G1287	A12	+	68269264	68269998	AT1G03870	FASCICLIN-like arabinoogalactan 9	Q9ZWA8	FLA9_ARATH Fasciclin-like arabinogalactan protein 9 OS=Arabidopsis thaliana GN=FLA9 PE=1 SV=1	A9XTK9	A9XTK9_GOSHI Fasciclin-like arabinogalactan protein 4 OS=Gossypium hirsutum GN=FLA4 PE=2 SV=1			PF02469.17|Fasciclin	IPR000782|FAS1 domain		335	84	2743	2288	1.99353	0.26209	1.58	1.76	1	0
Gh_D07G1912	D07	-	47150447	47151238	AT2G04780	FASCICLIN-like arabinoogalactan 7	Q9SJ81	FLA7_ARATH Fasciclin-like arabinogalactan protein 7 OS=Arabidopsis thaliana GN=FLA7 PE=1 SV=1	A9XTK8	A9XTK8_GOSHI Fasciclin-like arabinogalactan protein 3 OS=Gossypium hirsutum GN=FLA3 PE=2 SV=1			PF02469.17|Fasciclin	IPR000782|FAS1 domain		8	8	16	46	0.0259755	-1.53248	0.02	2.91	0	-1
Gh_A07G0896	A07	-	16027634	16028266	AT3G46550	Fasciclin-like arabinogalactan family protein	Q9SNC3	FLA4_ARATH Fasciclin-like arabinogalactan protein 4 OS=Arabidopsis thaliana GN=FLA4 PE=1 SV=1	A9XTL4	A9XTL4_GOSHI Fasciclin-like arabinogalactan protein 9 OS=Gossypium hirsutum GN=FLA9 PE=2 SV=1			PF02469.17|Fasciclin	IPR000782|FAS1 domain		61	24	23	23	1.36657	-0.0381515	2.18	0.04	1	0
Gh_D07G1394	D07	+	22730256	22730769	AT3G61640	arabinogalactan protein 20	Q9M373	AGP20_ARATH Arabinogalactan peptide 20 OS=Arabidopsis thaliana GN=AGP20 PE=3 SV=1	B9T338	B9T338_RICCO Putative uncharacterized protein OS=Ricinus communis GN=RCOM_0149710 PE=4 SV=1			PF06376.7|DUF1070	IPR009424|Arabinogalactan peptide, AGP		16	13	18	41	0.278357	-1.19534	0.19	1.47	0	-1
Gh_A01G0714	A01	+	13649630	13651601	AT5G55730	FASCICLIN-like arabinogalactan 1	Q9FM65	FLA1_ARATH Fasciclin-like arabinogalactan protein 1 OS=Arabidopsis thaliana GN=FLA1 PE=1 SV=1	A9XTL6	A9XTL6_GOSHI Fasciclin-like arabinogalactan protein 11 OS=Gossypium hirsutum GN=FLA11 PE=1 SV=1			PF02469.17|Fasciclin	IPR000782|FAS1 domain		186	112	65	186	0.725973	-1.50755	1.98	2.67	0	-1
Gh_D01G0733	D01	+	10455845	10457810	AT5G55730	FASCICLIN-like arabinogalactan 1	Q9FM65	FLA1_ARATH Fasciclin-like arabinogalactan protein 1 OS=Arabidopsis thaliana GN=FLA1 PE=1 SV=1	A9XTL6	A9XTL6_GOSHI Fasciclin-like arabinogalactan protein 11 OS=Gossypium hirsutum GN=FLA11 PE=1 SV=1			PF02469.17|Fasciclin	IPR000782|FAS1 domain		114	67	93	215	0.764606	-1.20925	1.65	2.81	0	-1
Gh_A09G0998	A09	-	59892693	59893424	AT5G60490	FASCICLIN-like arabinogalactan-protein 12	Q8LEJ6	FLA11_ARATH Fasciclin-like arabinogalactan protein 11 OS=Arabidopsis thaliana GN=FLA11 PE=2 SV=2	Q7Y250	Q7Y250_GOSHI Arabinogalactan protein OS=Gossypium hirsutum PE=2 SV=1			PF02469.17|Fasciclin	IPR000782|FAS1 domain		2010	766	4147	4673	1.39106	-0.172225	1.43	0.46	1	0
Gh_A01G1360	A01	+	85267510	85269169	AT4G38770	proline-rich protein 4	Q9SKP9	PRP2_ARATH Proline-rich protein 2 OS=Arabidopsis thaliana GN=PRP2 PE=2 SV=1	F6I133	F6I133_VITVI Putative uncharacterized protein OS=Vitis vinifera GN=VIT_03s0038g01830 PE=4 SV=1	gga:417020	NEFH; neurofilament, heavy polypeptide ; K04574 neurofilament heavy polypeptide	PF01190.12|Pollen_Ole_e_I	IPR006041|Pollen Ole e 1 allergen/extensin		803	1651	226	459	-1.03994	-1.02561	1.53	0.58	-1	0
Gh_D11G1049	D11	+	9278319	9279599	AT2G46630				B9T512	B9T512_RICCO Putative uncharacterized protein OS=Ricinus communis GN=RCOM_0144270 PE=4 SV=1						2	5	24	14	-1.33457	0.729698	2.09	3.36	-1	0
Gh_A05G0756	A05	+	7774698	7779128	AT3G47000	Glycosyl hydrolase family protein	Q23892	GLUA_DICDI Lysosomal beta glucosidase OS=Dictyostelium discoideum GN=gluA PE=1 SV=2	F6GUU3	F6GUU3_VITVI Putative uncharacterized protein OS=Vitis vinifera GN=VIT_06s0004g06110 PE=4 SV=1	ath:AT3G47000	glycosyl hydrolase family 3 protein ; K01188 beta-glucosidase [EC:3.2.1.21]	PF01915.17|Glyco_hydro_3_C; PF00933.16|Glyco_hydro_3	IPR001764|Glycoside hydrolase, family 3, N-terminal; IPR002772|Glycoside hydrolase family 3 C-terminal domain; IPR026892|Glycoside hydrolase family 3	GO:0004553|hydrolase activity, hydrolyzing O-glycosyl compounds ; GO:0005975|carbohydrate metabolic process	3	3	7	16	0	-1.20709	0	2.5	0	-1
Gh_D09G0990	D09	-	35629945	35633456	AT5G20950	Glycosyl hydrolase family protein	Q23892	GLUA_DICDI Lysosomal beta glucosidase OS=Dictyostelium discoideum GN=gluA PE=1 SV=2	Q7XAS3	Q7XAS3_GOSHI Beta-D-glucosidase OS=Gossypium hirsutum PE=1 SV=1	ath:AT3G47000	glycosyl hydrolase family 3 protein ; K01188 beta-glucosidase [EC:3.2.1.21]	PF01915.17|Glyco_hydro_3_C; PF00933.16|Glyco_hydro_3	IPR001764|Glycoside hydrolase, family 3, N-terminal; IPR002772|Glycoside hydrolase family 3 C-terminal domain; IPR026892|Glycoside hydrolase family 3	GO:0004553|hydrolase activity, hydrolyzing O-glycosyl compounds ; GO:0005975|carbohydrate metabolic process	153	67	16	31	1.17954	-0.952009	2.54	0.84	1	0
Gh_A09G0968	A09	-	59254440	59257942	AT5G20950	Glycosyl hydrolase family protein	Q23892	GLUA_DICDI Lysosomal beta glucosidase OS=Dictyostelium discoideum GN=gluA PE=1 SV=2	Q7XAS3	Q7XAS3_GOSHI Beta-D-glucosidase OS=Gossypium hirsutum PE=1 SV=1	ath:AT3G47000	glycosyl hydrolase family 3 protein ; K01188 beta-glucosidase [EC:3.2.1.21]	PF01915.17|Glyco_hydro_3_C; PF00933.16|Glyco_hydro_3	IPR001764|Glycoside hydrolase, family 3, N-terminal; IPR002772|Glycoside hydrolase family 3 C-terminal domain; IPR026892|Glycoside hydrolase family 3	GO:0004553|hydrolase activity, hydrolyzing O-glycosyl compounds ; GO:0005975|carbohydrate metabolic process	41	25	19	81	0.702537	-2.10006	0.94	2.3	0	-1
Gh_D07G1130	D07	-	16625727	16632307	AT5G20950	Glycosyl hydrolase family protein	P33363	BGLX_ECOLI Periplasmic beta-glucosidase OS=Escherichia coli (strain K12) GN=bglX PE=1 SV=2	Q7XAS3	Q7XAS3_GOSHI Beta-D-glucosidase OS=Gossypium hirsutum PE=1 SV=1	ath:AT3G47000	glycosyl hydrolase family 3 protein ; K01188 beta-glucosidase [EC:3.2.1.21]	PF01915.17|Glyco_hydro_3_C; PF00933.16|Glyco_hydro_3	IPR001764|Glycoside hydrolase, family 3, N-terminal; IPR002772|Glycoside hydrolase family 3 C-terminal domain; IPR026892|Glycoside hydrolase family 3	GO:0004553|hydrolase activity, hydrolyzing O-glycosyl compounds ; GO:0005975|carbohydrate metabolic process	3	13	6	23	-2.14658	-1.96226	0.94	1.44	0	-1
Gh_D04G1563	D04	-	47754389	47757533	AT3G19620	Glycosyl hydrolase family protein	Q9LJN4	BXL5_ARATH Probable beta-D-xylosidase 5 OS=Arabidopsis thaliana GN=BXL5 PE=2 SV=2	B9SNE2	B9SNE2_RICCO Beta-glucosidase, putative OS=Ricinus communis GN=RCOM_0175560 PE=4 SV=1	ath:AT1G02640	BXL2; BXL2 (BETA-XYLOSIDASE 2); hydrolase, hydrolyzing O-glycosyl compounds ; K05349 beta-glucosidase [EC:3.2.1.21]	PF14310.1|Fn3-like; PB000726|Pfam-B_726; PF01915.17|Glyco_hydro_3_C; PF00933.16|Glyco_hydro_3	IPR001764|Glycoside hydrolase, family 3, N-terminal; IPR002772|Glycoside hydrolase family 3 C-terminal domain; IPR026891|Fibronectin type III-like domain; IPR026892|Glycoside hydrolase family 3	GO:0004553|hydrolase activity, hydrolyzing O-glycosyl compounds ; GO:0005975|carbohydrate metabolic process	6	6	6	17	0.113329	-1.41273	0.06	1.39	0	-1
Gh_A04G0957	A04	-	59167813	59173529	AT5G64570	beta-D-xylosidase 4	A5JTQ3	XYL2_MEDSV Beta-xylosidase/alpha-L-arabinofuranosidase 2 OS=Medicago sativa subsp. varia GN=Xyl2 PE=2 SV=1	B9RIY8	B9RIY8_RICCO Beta-glucosidase, putative OS=Ricinus communis GN=RCOM_1752040 PE=4 SV=1	ath:AT1G02640	BXL2; BXL2 (BETA-XYLOSIDASE 2); hydrolase, hydrolyzing O-glycosyl compounds ; K05349 beta-glucosidase [EC:3.2.1.21]	PF14310.1|Fn3-like; PB000726|Pfam-B_726; PF01915.17|Glyco_hydro_3_C; PF00933.16|Glyco_hydro_3	IPR001764|Glycoside hydrolase, family 3, N-terminal; IPR002772|Glycoside hydrolase family 3 C-terminal domain; IPR026891|Fibronectin type III-like domain; IPR026892|Glycoside hydrolase family 3	GO:0004553|hydrolase activity, hydrolyzing O-glycosyl compounds ; GO:0005975|carbohydrate metabolic process	1	2	4	22	-0.916288	-2.54273	1.35	4.76	0	-1
Gh_Sca004768G05	scaffold4768	-	27351	32978	AT1G09910	Rhamnogalacturonate lyase family protein	Q8RJP2	RHIE_DICD3 Rhamnogalacturonate lyase OS=Dickeya dadantii (strain 3937) GN=rhiE PE=1 SV=1	B9H6S4	B9H6S4_POPTR Predicted protein OS=Populus trichocarpa GN=POPTRDRAFT_716387 PE=4 SV=1	afm:AFUA_8G00820	rhamnogalacturonase (EC:4.2.2.-); K06036	PF14686.1|fn3_3; PB010842|Pfam-B_10842; PF14683.1|CBM-like; PF06045.6|Rhamnogal_lyase	IPR010325|Rhamnogalacturonate lyase		19	19	31	69	0.0218191	-1.16584	0.01	1.86	0	-1
Gh_D02G1642	D02	+	56763520	56767194	AT1G10640	Pectin lyase-like superfamily protein	Q949Z1	PGLR4_ARATH Polygalacturonase At1g48100 OS=Arabidopsis thaliana GN=At1g48100 PE=2 SV=1	I1N1I1	I1N1I1_SOYBN Uncharacterized protein OS=Glycine max PE=3 SV=1	ath:AT5G14650	polygalacturonase, putative / pectinase, putative ; K01184 polygalacturonase [EC:3.2.1.15]	PF00295.12|Glyco_hydro_28	IPR000743|Glycoside hydrolase, family 28; IPR006626|Parallel beta-helix repeat	GO:0005975|carbohydrate metabolic process ; GO:0004650|polygalacturonase activity	19	22	6	20	-0.154181	-1.81808	0.58	2.9	0	-1
Gh_A03G1208	A03	+	86122611	86126322	AT1G10640	Pectin lyase-like superfamily protein	Q949Z1	PGLR4_ARATH Polygalacturonase At1g48100 OS=Arabidopsis thaliana GN=At1g48100 PE=2 SV=1	I1N1I1	I1N1I1_SOYBN Uncharacterized protein OS=Glycine max PE=3 SV=1	ath:AT5G14650	polygalacturonase, putative / pectinase, putative ; K01184 polygalacturonase [EC:3.2.1.15]	PF00295.12|Glyco_hydro_28	IPR000743|Glycoside hydrolase, family 28; IPR006626|Parallel beta-helix repeat	GO:0005975|carbohydrate metabolic process ; GO:0004650|polygalacturonase activity	12	20	6	19	-0.734502	-1.70442	2.39	3.13	0	-1
Gh_A04G1172	A04	-	61921131	61926335	AT1G10640	Pectin lyase-like superfamily protein	Q949Z1	PGLR4_ARATH Polygalacturonase At1g48100 OS=Arabidopsis thaliana GN=At1g48100 PE=2 SV=1	I1KXE1	I1KXE1_SOYBN Uncharacterized protein OS=Glycine max PE=3 SV=1	ath:AT5G14650	polygalacturonase, putative / pectinase, putative ; K01184 polygalacturonase [EC:3.2.1.15]	PF00295.12|Glyco_hydro_28	IPR000743|Glycoside hydrolase, family 28; IPR006626|Parallel beta-helix repeat	GO:0005975|carbohydrate metabolic process ; GO:0004650|polygalacturonase activity	4	21	6	7	-2.3857	-0.194157	2.44	0.2	-1	0
Gh_D04G1783	D04	-	50171629	50176793	AT1G10640	Pectin lyase-like superfamily protein	Q949Z1	PGLR4_ARATH Polygalacturonase At1g48100 OS=Arabidopsis thaliana GN=At1g48100 PE=2 SV=1	I1KXE1	I1KXE1_SOYBN Uncharacterized protein OS=Glycine max PE=3 SV=1	ath:AT5G14650	polygalacturonase, putative / pectinase, putative ; K01184 polygalacturonase [EC:3.2.1.15]	PF00295.12|Glyco_hydro_28	IPR000743|Glycoside hydrolase, family 28; IPR006626|Parallel beta-helix repeat	GO:0005975|carbohydrate metabolic process ; GO:0004650|polygalacturonase activity	4	19	4	6	-2.37669	-0.587787	2.67	0.72	-1	0
Gh_D01G1532	D01	-	47209490	47212246	AT1G23460	Pectin lyase-like superfamily protein	Q94AJ5	PGLR5_ARATH Probable polygalacturonase At1g80170 OS=Arabidopsis thaliana GN=At1g80170 PE=1 SV=1	B9I0Y7	B9I0Y7_POPTR Predicted protein OS=Populus trichocarpa GN=POPTRDRAFT_888210 PE=3 SV=1	ath:AT5G14650	polygalacturonase, putative / pectinase, putative ; K01184 polygalacturonase [EC:3.2.1.15]	PF00295.12|Glyco_hydro_28	IPR000743|Glycoside hydrolase, family 28	GO:0005975|carbohydrate metabolic process ; GO:0004650|polygalacturonase activity	5	12	10	19	-1.32913	-0.959775	1.45	1.69	-1	0
Gh_A01G1343	A01	-	83471160	83474053	AT1G23460	Pectin lyase-like superfamily protein	Q94AJ5	PGLR5_ARATH Probable polygalacturonase At1g80170 OS=Arabidopsis thaliana GN=At1g80170 PE=1 SV=1	B9N010	B9N010_POPTR Predicted protein (Fragment) OS=Populus trichocarpa GN=POPTRDRAFT_742328 PE=3 SV=1	ath:AT5G14650	polygalacturonase, putative / pectinase, putative ; K01184 polygalacturonase [EC:3.2.1.15]	PF00295.12|Glyco_hydro_28	IPR000743|Glycoside hydrolase, family 28	GO:0005975|carbohydrate metabolic process ; GO:0004650|polygalacturonase activity	3	10	8	17	-1.86322	-1.11514	1.59	1.82	-1	-1
Gh_D02G0621	D02	+	8493670	8495669	AT1G48100	Pectin lyase-like superfamily protein	Q949Z1	PGLR4_ARATH Polygalacturonase At1g48100 OS=Arabidopsis thaliana GN=At1g48100 PE=2 SV=1	F6HE14	F6HE14_VITVI Putative uncharacterized protein OS=Vitis vinifera GN=VIT_05s0020g00420 PE=2 SV=1	ath:AT5G14650	polygalacturonase, putative / pectinase, putative ; K01184 polygalacturonase [EC:3.2.1.15]	PF00295.12|Glyco_hydro_28	IPR000743|Glycoside hydrolase, family 28; IPR006626|Parallel beta-helix repeat	GO:0005975|carbohydrate metabolic process ; GO:0004650|polygalacturonase activity	5	13	6	11	-1.46634	-0.837397	2.1	1.53	-1	0
Gh_D10G1732	D10	+	48685872	48688666	AT3G16850	Pectin lyase-like superfamily protein	A7PZL3	PGLR_VITVI Probable polygalacturonase OS=Vitis vinifera GN=GSVIVT00026920001 PE=1 SV=1	M5XF65	M5XF65_PRUPE Uncharacterized protein OS=Prunus persica GN=PRUPE_ppa005599mg PE=4 SV=1	ath:AT3G15720	glycoside hydrolase family 28 protein / polygalacturonase (pectinase) family protein ; K01184 polygalacturonase [EC:3.2.1.15]	PF00295.12|Glyco_hydro_28	IPR000743|Glycoside hydrolase, family 28	GO:0005975|carbohydrate metabolic process ; GO:0004650|polygalacturonase activity	13	12	7	20	0.094029	-1.46407	0.12	1.98	0	-1
Gh_A10G1489	A10	+	81734255	81737048	AT3G16850	Pectin lyase-like superfamily protein	A7PZL3	PGLR_VITVI Probable polygalacturonase OS=Vitis vinifera GN=GSVIVT00026920001 PE=1 SV=1	M5XF65	M5XF65_PRUPE Uncharacterized protein OS=Prunus persica GN=PRUPE_ppa005599mg PE=4 SV=1	ath:AT3G15720	glycoside hydrolase family 28 protein / polygalacturonase (pectinase) family protein ; K01184 polygalacturonase [EC:3.2.1.15]	PF00295.12|Glyco_hydro_28	IPR000743|Glycoside hydrolase, family 28	GO:0005975|carbohydrate metabolic process ; GO:0004650|polygalacturonase activity	9	8	6	21	0.182321	-1.72402	0.14	1.66	0	-1
Gh_A06G0704	A06	+	19665191	19667971	AT3G42950	Pectin lyase-like superfamily protein	A7PZL3	PGLR_VITVI Probable polygalacturonase OS=Vitis vinifera GN=GSVIVT00026920001 PE=1 SV=1	M5W735	M5W735_PRUPE Uncharacterized protein OS=Prunus persica GN=PRUPE_ppa004793mg PE=4 SV=1	ath:AT3G15720	glycoside hydrolase family 28 protein / polygalacturonase (pectinase) family protein ; K01184 polygalacturonase [EC:3.2.1.15]	PF00295.12|Glyco_hydro_28	IPR000743|Glycoside hydrolase, family 28; IPR006626|Parallel beta-helix repeat	GO:0005975|carbohydrate metabolic process ; GO:0004650|polygalacturonase activity	4	5	35	75	-0.325422	-1.12137	0.1	2.27	0	-1
Gh_A10G1881	A10	+	95254564	95256843	AT3G55140	Pectin lyase-like superfamily protein	Q9C8G4	PLY4_ARATH Probable pectate lyase 4 OS=Arabidopsis thaliana GN=At1g30350 PE=2 SV=1	B9HM29	B9HM29_POPTR Predicted protein OS=Populus trichocarpa GN=POPTRDRAFT_720641 PE=2 SV=1	ath:AT3G55140	pectate lyase family protein ; K01728 pectate lyase [EC:4.2.2.2]	PB000238|Pfam-B_238; PF00544.14|Pec_lyase_C	IPR002022|Pectate lyase/Amb allergen; IPR018082|AmbAllergen		3	6	4	16	-0.77319	-2.05191	0.68	2.08	0	-1
Gh_A08G1072	A08	+	73725857	73728619	AT3G62110	Pectin lyase-like superfamily protein	A7PZL3	PGLR_VITVI Probable polygalacturonase OS=Vitis vinifera GN=GSVIVT00026920001 PE=1 SV=1	M5XME1	M5XME1_PRUPE Uncharacterized protein OS=Prunus persica GN=PRUPE_ppa005310mg PE=4 SV=1	ath:AT3G15720	glycoside hydrolase family 28 protein / polygalacturonase (pectinase) family protein ; K01184 polygalacturonase [EC:3.2.1.15]	PF00295.12|Glyco_hydro_28	IPR000743|Glycoside hydrolase, family 28; IPR006626|Parallel beta-helix repeat	GO:0005975|carbohydrate metabolic process ; GO:0004650|polygalacturonase activity	43	17	34	79	1.34897	-1.23463	1.98	2.61	1	-1
Gh_D08G1353	D08	+	44403391	44406282	AT3G62110	Pectin lyase-like superfamily protein	A7PZL3	PGLR_VITVI Probable polygalacturonase OS=Vitis vinifera GN=GSVIVT00026920001 PE=1 SV=1	M5XME1	M5XME1_PRUPE Uncharacterized protein OS=Prunus persica GN=PRUPE_ppa005310mg PE=4 SV=1	ath:AT5G17200	glycoside hydrolase family 28 protein / polygalacturonase (pectinase) family protein ; K01184 polygalacturonase [EC:3.2.1.15]	PF00295.12|Glyco_hydro_28	IPR000743|Glycoside hydrolase, family 28; IPR006626|Parallel beta-helix repeat	GO:0005975|carbohydrate metabolic process ; GO:0004650|polygalacturonase activity	38	13	25	50	1.57859	-1.00106	1.77	1.72	1	-1
Gh_D09G1925	D09	-	46665178	46669101	AT4G13710	Pectin lyase-like superfamily protein	Q944R1	PLY15_ARATH Probable pectate lyase 15 OS=Arabidopsis thaliana GN=At4g13710 PE=2 SV=1	A9PIK2	A9PIK2_POPTR Predicted protein OS=Populus trichocarpa GN=POPTRDRAFT_547984 PE=2 SV=1	ath:AT4G13710	pectate lyase family protein ; K01728 pectate lyase [EC:4.2.2.2]	PB000238|Pfam-B_238; PF00544.14|Pec_lyase_C	IPR002022|Pectate lyase/Amb allergen; IPR018082|AmbAllergen		361	175	184	220	1.04229	-0.258127	1.59	0.32	1	0
Gh_A09G1803	A09	-	71324619	71328528	AT4G13710	Pectin lyase-like superfamily protein	Q944R1	PLY15_ARATH Probable pectate lyase 15 OS=Arabidopsis thaliana GN=At4g13710 PE=2 SV=1	A9PIK2	A9PIK2_POPTR Predicted protein OS=Populus trichocarpa GN=POPTRDRAFT_547984 PE=2 SV=1	ath:AT4G13710	pectate lyase family protein ; K01728 pectate lyase [EC:4.2.2.2]	PB000238|Pfam-B_238; PF00544.14|Pec_lyase_C	IPR002022|Pectate lyase/Amb allergen; IPR018082|AmbAllergen		450	223	127	159	1.01471	-0.324044	1.64	0.27	1	0
Gh_D05G3049	D05	+	41486893	41494462	AT4G13710	Pectin lyase-like superfamily protein	Q944R1	PLY15_ARATH Probable pectate lyase 15 OS=Arabidopsis thaliana GN=At4g13710 PE=2 SV=1	A9PIK2	A9PIK2_POPTR Predicted protein OS=Populus trichocarpa GN=POPTRDRAFT_547984 PE=2 SV=1	ath:AT4G13710	pectate lyase family protein ; K01728 pectate lyase [EC:4.2.2.2]	PB000238|Pfam-B_238; PF00544.14|Pec_lyase_C	IPR002022|Pectate lyase/Amb allergen; IPR018082|AmbAllergen		5	3	72	151	0.965065	-1.07839	0.12	1.84	0	-1
Gh_A05G3634	scaffold1052_A05	+	169414	176662	AT4G13710	Pectin lyase-like superfamily protein	Q944R1	PLY15_ARATH Probable pectate lyase 15 OS=Arabidopsis thaliana GN=At4g13710 PE=2 SV=1	A9PIK2	A9PIK2_POPTR Predicted protein OS=Populus trichocarpa GN=POPTRDRAFT_547984 PE=2 SV=1	ath:AT4G13710	pectate lyase family protein ; K01728 pectate lyase [EC:4.2.2.2]	PB000238|Pfam-B_238; PF00544.14|Pec_lyase_C	IPR002022|Pectate lyase/Amb allergen; IPR018082|AmbAllergen		2	2	32	136	0.182322	-2.10312	0.01	1.83	0	-1
Gh_A03G1147	A03	+	82275356	82278533	AT5G63180	Pectin lyase-like superfamily protein	Q9FXD8	PLY5_ARATH Probable pectate lyase 5 OS=Arabidopsis thaliana GN=At1g67750 PE=2 SV=2	Q93XJ1	Q93XJ1_SALGI Pectate lyase OS=Salix gilgiana GN=SgPL1 PE=2 SV=1	osa:4335013	Os04g0137100; hypothetical protein ; K01728 pectate lyase [EC:4.2.2.2]	PB000238|Pfam-B_238; PF00544.14|Pec_lyase_C	IPR002022|Pectate lyase/Amb allergen; IPR018082|AmbAllergen		24	11	6	2	1.10866	1.6488	1.58	0.67	1	0
Gh_A03G0885	A03	-	56794871	56796095	AT2G03090	expansin A15	O80622	EXP15_ARATH Expansin-A15 OS=Arabidopsis thaliana GN=EXPA15 PE=2 SV=2	Q8LKJ8	Q8LKJ8_GOSHI Alpha-expansin (Precursor) OS=Gossypium hirsutum GN=Exp6 PE=3 SV=1			PF03330.13|DPBB_1; PF01357.16|Pollen_allerg_1	IPR002963|Expansin; IPR007112|Expansin/pollen allergen, DPBB domain; IPR007117|Expansin, cellulose-binding-like domain; IPR007118|Expansin/Lol pI; IPR009009|RlpA-like double-psi beta-barrel domain	GO:0009664|plant-type cell wall organization ; GO:0005576|extracellular region	34	9	2	3	1.98099	-0.788405	2.18	0.24	1	0
Gh_D08G2130	D08	+	60673211	60676126	AT2G36870	xyloglucan endotransglucosylase/hydrolase 32	P93046	XTH31_ARATH Probable xyloglucan endotransglucosylase/hydrolase protein 31 OS=Arabidopsis thaliana GN=XTH31 PE=2 SV=2	A0MMD6	A0MMD6_LITCN Xyloglucan endotransglycosylase 1 OS=Litchi chinensis GN=XET1 PE=2 SV=1	ath:AT3G44990	XTR8; XTR8 (xyloglucan:xyloglucosyl transferase 8); hydrolase, acting on glycosyl bonds ; K08235 xyloglucan:xyloglucosyl transferase [EC:2.4.1.207]	PF06955.7|XET_C; PF00722.16|Glyco_hydro_16	IPR000757|Glycoside hydrolase, family 16; IPR010713|Xyloglucan endo-transglycosylase, C-terminal	GO:0048046|apoplast ; GO:0016762|xyloglucan:xyloglucosyl transferase activity ; GO:0004553|hydrolase activity, hydrolyzing O-glycosyl compounds ; GO:0005618|cell wall ; GO:0006073|cellular glucan metabolic process ; GO:0005975|carbohydrate metabolic process	4	2	123	38	0.773226	1.68194	0.19	3.15	0	1
Gh_A08G1784	A08	+	98106296	98109205	AT2G36870	xyloglucan endotransglucosylase/hydrolase 32	Q9SJL9	XTH32_ARATH Probable xyloglucan endotransglucosylase/hydrolase protein 32 OS=Arabidopsis thaliana GN=XTH32 PE=2 SV=1	A0MMD6	A0MMD6_LITCN Xyloglucan endotransglycosylase 1 OS=Litchi chinensis GN=XET1 PE=2 SV=1	ath:AT2G36870	xyloglucan:xyloglucosyl transferase, putative / xyloglucan endotransglycosylase, putative / endo-xyloglucan transferase, putative ; K08235 xyloglucan:xyloglucosyl transferase [EC:2.4.1.207]	PF06955.7|XET_C; PF00722.16|Glyco_hydro_16	IPR000757|Glycoside hydrolase, family 16; IPR010713|Xyloglucan endo-transglycosylase, C-terminal	GO:0048046|apoplast ; GO:0016762|xyloglucan:xyloglucosyl transferase activity ; GO:0004553|hydrolase activity, hydrolyzing O-glycosyl compounds ; GO:0005618|cell wall ; GO:0006073|cellular glucan metabolic process ; GO:0005975|carbohydrate metabolic process	2	2	121	34	0.336477	1.82148	0.1	3.91	0	1
Gh_D09G1463	D09	+	42231968	42233089	AT2G39700	expansin A4	O48818	EXPA4_ARATH Expansin-A4 OS=Arabidopsis thaliana GN=EXPA4 PE=1 SV=1	Q8LKK0	Q8LKK0_GOSHI Alpha-expansin (Precursor) OS=Gossypium hirsutum GN=Exp4 PE=3 SV=1			PF03330.13|DPBB_1; PF01357.16|Pollen_allerg_1	IPR002963|Expansin; IPR007112|Expansin/pollen allergen, DPBB domain; IPR007117|Expansin, cellulose-binding-like domain; IPR007118|Expansin/Lol pI; IPR009009|RlpA-like double-psi beta-barrel domain	GO:0009664|plant-type cell wall organization ; GO:0005576|extracellular region	63	29	10	14	1.12549	-0.376831	1.32	0.15	1	0
Gh_D10G1145	D10	+	18608318	18609246	AT2G40610	expansin A8	Q40636	EXPA2_ORYSJ Expansin-A2 OS=Oryza sativa subsp. japonica GN=EXPA2 PE=2 SV=2	I1T478	I1T478_9ROSI Alpha-expansin 1 OS=Gossypium trilobum PE=3 SV=1			PF03330.13|DPBB_1; PF01357.16|Pollen_allerg_1	IPR002963|Expansin; IPR007112|Expansin/pollen allergen, DPBB domain; IPR007117|Expansin, cellulose-binding-like domain; IPR007118|Expansin/Lol pI; IPR009009|RlpA-like double-psi beta-barrel domain	GO:0009664|plant-type cell wall organization ; GO:0005576|extracellular region	1657	710	237	427	1.22251	-0.851827	1.95	0.6	1	0
Gh_A10G2323	scaffold2672_A10	-	149124	150059	AT2G40610	expansin A8	Q0DHB7	EXPA4_ORYSJ Expansin-A4 OS=Oryza sativa subsp. japonica GN=EXPA4 PE=2 SV=1	Q283Q7	Q283Q7_GOSHI Alpha expansin OS=Gossypium hirsutum GN=EXPA15 PE=2 SV=1			PF03330.13|DPBB_1; PF01357.16|Pollen_allerg_1	IPR002963|Expansin; IPR007112|Expansin/pollen allergen, DPBB domain; IPR007117|Expansin, cellulose-binding-like domain; IPR007118|Expansin/Lol pI; IPR009009|RlpA-like double-psi beta-barrel domain	GO:0009664|plant-type cell wall organization ; GO:0005576|extracellular region	1262	534	108	274	1.24013	-1.34621	1.71	0.58	1	0
Gh_D02G0220	D02	+	2631191	2632576	AT3G23730	xyloglucan endotransglucosylase/hydrolase 16	P35694	BRU1_SOYBN Brassinosteroid-regulated protein BRU1 OS=Glycine max PE=2 SV=1	B9IA86	B9IA86_POPTR Predicted protein OS=Populus trichocarpa GN=POPTRDRAFT_572886 PE=4 SV=1	ath:AT3G23730	xyloglucan:xyloglucosyl transferase, putative / xyloglucan endotransglycosylase, putative / endo-xyloglucan transferase, putative ; K08235 xyloglucan:xyloglucosyl transferase [EC:2.4.1.207]	PF06955.7|XET_C; PF00722.16|Glyco_hydro_16	IPR000757|Glycoside hydrolase, family 16; IPR008263|Glycoside hydrolase, family 16, active site; IPR008264|Beta-glucanase; IPR010713|Xyloglucan endo-transglycosylase, C-terminal	GO:0048046|apoplast ; GO:0016762|xyloglucan:xyloglucosyl transferase activity ; GO:0004553|hydrolase activity, hydrolyzing O-glycosyl compounds ; GO:0005618|cell wall ; GO:0006073|cellular glucan metabolic process ; GO:0005975|carbohydrate metabolic process	134	33	21	34	2.01341	-0.714786	1.65	0.33	1	0
Gh_D05G0764	D05	-	6285485	6286628	AT4G03210	xyloglucan endotransglucosylase/hydrolase 9	Q8LDW9	XTH9_ARATH Xyloglucan endotransglucosylase/hydrolase protein 9 OS=Arabidopsis thaliana GN=XTH9 PE=2 SV=2	N0DX39	N0DX39_CUCSA Putative xyloglucan endotransglucosylase/hydrolase OS=Cucumis sativus GN=xth21 PE=4 SV=1	osa:4350662	Os11g0539200; hypothetical protein ; K08235 xyloglucan:xyloglucosyl transferase [EC:2.4.1.207]	PF06955.7|XET_C; PF00722.16|Glyco_hydro_16	IPR000757|Glycoside hydrolase, family 16; IPR010713|Xyloglucan endo-transglycosylase, C-terminal	GO:0048046|apoplast ; GO:0016762|xyloglucan:xyloglucosyl transferase activity ; GO:0004553|hydrolase activity, hydrolyzing O-glycosyl compounds ; GO:0005618|cell wall ; GO:0006073|cellular glucan metabolic process ; GO:0005975|carbohydrate metabolic process	3	9	7	7	-1.54756	-0.0289882	1.58	0.03	-1	0
Gh_D08G1739	D08	-	53651905	53653218	AT4G17030	expansin-like B1	Q850K7	EXLB1_ORYSJ Expansin-like B1 OS=Oryza sativa subsp. japonica GN=EXLB1 PE=2 SV=2	F6HTB9	F6HTB9_VITVI Putative uncharacterized protein OS=Vitis vinifera GN=VIT_02s0012g00830 PE=3 SV=1			PF03330.13|DPBB_1; PF01357.16|Pollen_allerg_1	IPR007112|Expansin/pollen allergen, DPBB domain; IPR007117|Expansin, cellulose-binding-like domain; IPR007118|Expansin/Lol pI; IPR009009|RlpA-like double-psi beta-barrel domain	GO:0005576|extracellular region	5	12	13	35	-1.28967	-1.4286	1.36	2.6	-1	-1
Gh_D08G1774	D08	+	54163295	54164384	AT4G17030	expansin-like B1	O23547	EXLB1_ARATH Expansin-like B1 OS=Arabidopsis thaliana GN=EXLB1 PE=2 SV=2	B9N2W2	B9N2W2_POPTR Putative uncharacterized protein PtrEXLB1 OS=Populus trichocarpa GN=PtrEXLB1 PE=3 SV=1			PF03330.13|DPBB_1; PF01357.16|Pollen_allerg_1	IPR005795|Major pollen allergen Lol pI; IPR007112|Expansin/pollen allergen, DPBB domain; IPR007117|Expansin, cellulose-binding-like domain; IPR007118|Expansin/Lol pI; IPR009009|RlpA-like double-psi beta-barrel domain	GO:0019953|sexual reproduction; GO:0005576|extracellular region	15	3	8	9	2.14007	-0.202941	1.9	0.23	1	0
Gh_D11G0896	D11	-	7748672	7749420	AT4G28850	xyloglucan endotransglucosylase/hydrolase 26	Q9ZV40	XTH21_ARATH Probable xyloglucan endotransglucosylase/hydrolase protein 21 OS=Arabidopsis thaliana GN=XTH21 PE=2 SV=1	B9GPU5	B9GPU5_POPTR Predicted protein OS=Populus trichocarpa GN=POPTRDRAFT_552110 PE=4 SV=1	ath:AT2G18800	xyloglucan:xyloglucosyl transferase, putative / xyloglucan endotransglycosylase, putative / endo-xyloglucan transferase, putative ; K08235 xyloglucan:xyloglucosyl transferase [EC:2.4.1.207]	PF00722.16|Glyco_hydro_16	IPR000757|Glycoside hydrolase, family 16; IPR008264|Beta-glucanase	GO:0004553|hydrolase activity, hydrolyzing O-glycosyl compounds ; GO:0005975|carbohydrate metabolic process	54	21	51	54	1.39731	-0.0818788	2.1	0.17	1	0
Gh_A11G0768	A11	-	7585700	7586454	AT4G28850	xyloglucan endotransglucosylase/hydrolase 26	Q9ZV40	XTH21_ARATH Probable xyloglucan endotransglucosylase/hydrolase protein 21 OS=Arabidopsis thaliana GN=XTH21 PE=2 SV=1	B9GPU5	B9GPU5_POPTR Predicted protein OS=Populus trichocarpa GN=POPTRDRAFT_552110 PE=4 SV=1	ath:AT2G18800	xyloglucan:xyloglucosyl transferase, putative / xyloglucan endotransglycosylase, putative / endo-xyloglucan transferase, putative ; K08235 xyloglucan:xyloglucosyl transferase [EC:2.4.1.207]	PF00722.16|Glyco_hydro_16	IPR000757|Glycoside hydrolase, family 16; IPR008264|Beta-glucanase	GO:0004553|hydrolase activity, hydrolyzing O-glycosyl compounds ; GO:0005975|carbohydrate metabolic process	43	14	43	47	1.59227	-0.136809	1.53	0.19	1	0
Gh_Sca010556G01	scaffold10556	-	2653	3774	AT4G37800	xyloglucan endotransglucosylase/hydrolase 7	Q8LER3	XTH7_ARATH Probable xyloglucan endotransglucosylase/hydrolase protein 7 OS=Arabidopsis thaliana GN=XTH7 PE=2 SV=2	B2KL34	B2KL34_GOSHI Xyloglucan endotransglucosylase/hydrolase OS=Gossypium hirsutum GN=XTH PE=2 SV=1	ath:AT4G37800	xyloglucan:xyloglucosyl transferase, putative / xyloglucan endotransglycosylase, putative / endo-xyloglucan transferase, putative ; K08235 xyloglucan:xyloglucosyl transferase [EC:2.4.1.207]	PF06955.7|XET_C; PF00722.16|Glyco_hydro_16	IPR000757|Glycoside hydrolase, family 16; IPR008263|Glycoside hydrolase, family 16, active site; IPR010713|Xyloglucan endo-transglycosylase, C-terminal	GO:0048046|apoplast ; GO:0016762|xyloglucan:xyloglucosyl transferase activity ; GO:0004553|hydrolase activity, hydrolyzing O-glycosyl compounds ; GO:0005618|cell wall ; GO:0006073|cellular glucan metabolic process ; GO:0005975|carbohydrate metabolic process	756	310	1221	1353	1.2833	-0.147171	1.51	0.35	1	0
Gh_A11G0455	A11	-	4371589	4372710	AT4G37800	xyloglucan endotransglucosylase/hydrolase 7	Q8LER3	XTH7_ARATH Probable xyloglucan endotransglucosylase/hydrolase protein 7 OS=Arabidopsis thaliana GN=XTH7 PE=2 SV=2	B7SCZ6	B7SCZ6_GOSAR Xyloglucan endotransglycosylase/hydrolase OS=Gossypium arboreum PE=4 SV=1	ath:AT4G37800	xyloglucan:xyloglucosyl transferase, putative / xyloglucan endotransglycosylase, putative / endo-xyloglucan transferase, putative ; K08235 xyloglucan:xyloglucosyl transferase [EC:2.4.1.207]	PF06955.7|XET_C; PF00722.16|Glyco_hydro_16	IPR000757|Glycoside hydrolase, family 16; IPR008263|Glycoside hydrolase, family 16, active site; IPR010713|Xyloglucan endo-transglycosylase, C-terminal	GO:0048046|apoplast ; GO:0016762|xyloglucan:xyloglucosyl transferase activity ; GO:0004553|hydrolase activity, hydrolyzing O-glycosyl compounds ; GO:0005618|cell wall ; GO:0006073|cellular glucan metabolic process ; GO:0005975|carbohydrate metabolic process	592	245	736	895	1.27086	-0.283092	1.6	0.66	1	0
Gh_A01G1439	A01	+	89104034	89105296	AT4G38400	expansin-like A2	Q9LZT4	EXLA1_ARATH Expansin-like A1 OS=Arabidopsis thaliana GN=EXLA1 PE=2 SV=1	B9HQZ5	B9HQZ5_POPTR Putative uncharacterized protein PtrEXLA2 OS=Populus trichocarpa GN=PtrEXLA2 PE=3 SV=1			PF03330.13|DPBB_1; PF01357.16|Pollen_allerg_1	IPR005795|Major pollen allergen Lol pI; IPR007112|Expansin/pollen allergen, DPBB domain; IPR007117|Expansin, cellulose-binding-like domain; IPR007118|Expansin/Lol pI; IPR009009|RlpA-like double-psi beta-barrel domain	GO:0019953|sexual reproduction; GO:0005576|extracellular region	3	8	12	30	-1.63372	-1.34313	0.56	1.4	0	-1
Gh_A07G0082	A07	-	1050682	1054031	AT5G19730	Pectin lyase-like superfamily protein	Q8VYZ3	PME53_ARATH Probable pectinesterase 53 OS=Arabidopsis thaliana GN=PME53 PE=2 SV=1	B9RKG6	B9RKG6_RICCO Pectinesterase OS=Ricinus communis GN=RCOM_1049330 PE=3 SV=1	ath:AT5G19730	pectinesterase family protein ; K01051 pectinesterase [EC:3.1.1.11]	PF01095.14|Pectinesterase	IPR000070|Pectinesterase, catalytic; IPR018040|Pectinesterase, active site	GO:0005618|cell wall ; GO:0030599|pectinesterase activity ; GO:0042545|cell wall modification	4	14	7	55	-1.70475	-3.03835	1.13	2.49	0	-1
Gh_D07G0091	D07	-	1046693	1049885	AT5G19730	Pectin lyase-like superfamily protein	Q8VYZ3	PME53_ARATH Probable pectinesterase 53 OS=Arabidopsis thaliana GN=PME53 PE=2 SV=1	B9RKG6	B9RKG6_RICCO Pectinesterase OS=Ricinus communis GN=RCOM_1049330 PE=3 SV=1	ath:AT5G19730	pectinesterase family protein ; K01051 pectinesterase [EC:3.1.1.11]	PF01095.14|Pectinesterase	IPR000070|Pectinesterase, catalytic; IPR018040|Pectinesterase, active site	GO:0005618|cell wall ; GO:0030599|pectinesterase activity ; GO:0042545|cell wall modification	4	13	5	20	-1.51059	-2.09251	1.76	2.41	-1	-1
Gh_A04G1394	scaffold996_A04	-	43078	45767	AT3G09410	Pectinacetylesterase family protein	Q6P988	NOTUM_HUMAN Protein notum homolog OS=Homo sapiens GN=NOTUM PE=2 SV=2	M5VZ85	M5VZ85_PRUPE Uncharacterized protein OS=Prunus persica GN=PRUPE_ppa005949mg PE=4 SV=1	mbr:MONBRDRAFT_30786	hypothetical protein ; K11866 STAM-binding protein [EC:3.1.2.15]	PF03283.8|PAE; PB012650|Pfam-B_12650	IPR004963|Pectinacetylesterase		5	10	10	33	-0.969401	-1.65976	0.73	2.05	0	-1
Gh_D12G2455	D12	+	57531281	57538545	AT5G23870	Pectinacetylesterase family protein	Q8R116	NOTUM_MOUSE Protein notum homolog OS=Mus musculus GN=Notum PE=2 SV=2	E0CV10	E0CV10_VITVI Putative uncharacterized protein OS=Vitis vinifera GN=VIT_16s0050g00570 PE=4 SV=1	mbr:MONBRDRAFT_30786	hypothetical protein ; K11866 STAM-binding protein [EC:3.1.2.15]	PF03283.8|PAE; PB012650|Pfam-B_12650	IPR004963|Pectinacetylesterase		2	3	11	22	-0.916291	-1.06526	0.25	1.38	0	-1
Gh_A12G2321	A12	+	85798411	85805158	AT5G23870	Pectinacetylesterase family protein	Q8R116	NOTUM_MOUSE Protein notum homolog OS=Mus musculus GN=Notum PE=2 SV=2	E0CV10	E0CV10_VITVI Putative uncharacterized protein OS=Vitis vinifera GN=VIT_16s0050g00570 PE=4 SV=1	mbr:MONBRDRAFT_30786	hypothetical protein ; K11866 STAM-binding protein [EC:3.1.2.15]	PF03283.8|PAE; PB012650|Pfam-B_12650	IPR004963|Pectinacetylesterase		2	3	9	21	-0.810931	-1.27122	0.31	1.89	0	-1
Gh_D07G0885	D07	-	11534967	11539318	AT5G48450	SKU5 similar 3	Q9SU40	SKU5_ARATH Monocopper oxidase-like protein SKU5 OS=Arabidopsis thaliana GN=SKU5 PE=1 SV=1	D7TYL0	D7TYL0_VITVI Putative uncharacterized protein OS=Vitis vinifera GN=VIT_07s0141g00540 PE=4 SV=1	ath:AT1G55570	SKS12; SKS12 (SKU5 Similar 12); copper ion binding / oxidoreductase ; K00423 L-ascorbate oxidase [EC:1.10.3.3]	PF07732.10|Cu-oxidase_3; PF00394.17|Cu-oxidase; PF07731.9|Cu-oxidase_2	IPR001117|Multicopper oxidase, type 1; IPR011706|Multicopper oxidase, type 2; IPR011707|Multicopper oxidase, type 3	GO:0005507|copper ion binding ; GO:0055114|oxidation-reduction process ; GO:0016491|oxidoreductase activity	7	7	13	34	-0.149532	-1.4051	0.08	1.81	0	-1
Gh_A07G0825	A07	-	14216269	14228157	AT5G48450	SKU5 similar 3	Q9SU40	SKU5_ARATH Monocopper oxidase-like protein SKU5 OS=Arabidopsis thaliana GN=SKU5 PE=1 SV=1	D7TYL0	D7TYL0_VITVI Putative uncharacterized protein OS=Vitis vinifera GN=VIT_07s0141g00540 PE=4 SV=1	ath:AT1G55570	SKS12; SKS12 (SKU5 Similar 12); copper ion binding / oxidoreductase ; K00423 L-ascorbate oxidase [EC:1.10.3.3]	PF07732.10|Cu-oxidase_3; PF00394.17|Cu-oxidase; PF07731.9|Cu-oxidase_2	IPR001117|Multicopper oxidase, type 1; IPR011706|Multicopper oxidase, type 2; IPR011707|Multicopper oxidase, type 3	GO:0005507|copper ion binding ; GO:0055114|oxidation-reduction process ; GO:0016491|oxidoreductase activity	4	8	7	21	-0.940983	-1.57351	0.61	1.62	0	-1
Gh_A01G0633	A01	+	11349478	11352247	AT3G20480	tetraacyldisaccharide 4\'-kinase family protein	Q8LEA0	LPXK_ARATH Probable tetraacyldisaccharide 4'-kinase, mitochondrial OS=Arabidopsis thaliana GN=LPXK PE=2 SV=1	B9I7K9	B9I7K9_POPTR Predicted protein (Fragment) OS=Populus trichocarpa GN=POPTRDRAFT_242629 PE=3 SV=1			PF02606.9|LpxK	IPR003758|Tetraacyldisaccharide 4'-kinase	GO:0005524|ATP binding ; GO:0009029|tetraacyldisaccharide 4'-kinase activity ; GO:0009245|lipid A biosynthetic process	2	3	7	14	-0.356675	-1.06582	0.24	1.89	0	-1
Gh_A13G0129	A13	-	1426425	1445229	AT3G56130	biotin/lipoyl attachment domain-containing protein	Q06881	BCCP_NOSS1 Biotin carboxyl carrier protein of acetyl-CoA carboxylase OS=Nostoc sp. (strain PCC 7120 / UTEX 2576) GN=accB PE=1 SV=2	I1LMV7	I1LMV7_SOYBN Uncharacterized protein OS=Glycine max PE=4 SV=1	vvi:100266760	hypothetical protein LOC100266760 ; K02160 acetyl-CoA carboxylase biotin carboxyl carrier protein	PF00364.17|Biotin_lipoyl	IPR000089|Biotin/lipoyl attachment		49	63	44	100	-0.372389	-1.19356	0.4	1.47	0	-1
Gh_A06G1968	scaffold1321_A06	-	27230	31196	AT3G56130	biotin/lipoyl attachment domain-containing protein	Q06881	BCCP_NOSS1 Biotin carboxyl carrier protein of acetyl-CoA carboxylase OS=Nostoc sp. (strain PCC 7120 / UTEX 2576) GN=accB PE=1 SV=2	M5XEP4	M5XEP4_PRUPE Uncharacterized protein OS=Prunus persica GN=PRUPE_ppa009474mg PE=4 SV=1	vvi:100266760	hypothetical protein LOC100266760 ; K02160 acetyl-CoA carboxylase biotin carboxyl carrier protein	PF00364.17|Biotin_lipoyl	IPR000089|Biotin/lipoyl attachment		5	6	10	24	-0.322773	-1.21061	0.14	1.32	0	-1
Gh_A01G1574	A01	+	92949679	92961931	AT1G36160	acetyl-CoA carboxylase 1	Q38970	ACC1_ARATH Acetyl-CoA carboxylase 1 OS=Arabidopsis thaliana GN=ACC1 PE=1 SV=1	B9RJG2	B9RJG2_RICCO Homomeric Acetyl-CoA Carboxylase (Hom-ACCase) OS=Ricinus communis GN=RCOM_1033990 PE=4 SV=1	vvi:100247288	hypothetical protein LOC100247288 ; K01946 biotin carboxylase [EC:6.3.4.14]; K11262 acetyl-CoA carboxylase [EC:6.4.1.2]	PF00364.17|Biotin_lipoyl; PF00289.17|CPSase_L_chain; PF08326.7|ACC_central; PB003837|Pfam-B_3837; PF01039.17|Carboxyl_trans; PF02785.14|Biotin_carb_C; PF02786.12|CPSase_L_D2	IPR000022|Carboxyl transferase; IPR000089|Biotin/lipoyl attachment; IPR001882|Biotin-binding site; IPR005479|Carbamoyl-phosphate synthetase large subunit-like, ATP-binding domain; IPR005481|Carbamoyl-phosphate synthase, large subunit, N-terminal; IPR005482|Biotin carboxylase, C-terminal; IPR011761|ATP-grasp fold; IPR011762|Acetyl-coenzyme A carboxyltransferase, N-terminal; IPR011763|Acetyl-coenzy…	GO:0003989|acetyl-CoA carboxylase activity ; GO:0004075|biotin carboxylase activity; GO:0008152|metabolic process ; GO:0005524|ATP binding ; GO:0003824|catalytic activity ; GO:0016874|ligase activity ; GO:0046872|metal ion binding ; GO:0006633|fatty acid biosynthetic process	519	191	144	228	1.44511	-0.658015	2.78	1.19	1	0
Gh_D01G1885	D01	-	56791739	56803984	AT1G36160	acetyl-CoA carboxylase 1	Q38970	ACC1_ARATH Acetyl-CoA carboxylase 1 OS=Arabidopsis thaliana GN=ACC1 PE=1 SV=1	B9RJG2	B9RJG2_RICCO Homomeric Acetyl-CoA Carboxylase (Hom-ACCase) OS=Ricinus communis GN=RCOM_1033990 PE=4 SV=1	vvi:100247288	hypothetical protein LOC100247288 ; K01946 biotin carboxylase [EC:6.3.4.14]; K11262 acetyl-CoA carboxylase [EC:6.4.1.2]	PF00364.17|Biotin_lipoyl; PF00289.17|CPSase_L_chain; PF08326.7|ACC_central; PB003837|Pfam-B_3837; PF01039.17|Carboxyl_trans; PF02785.14|Biotin_carb_C; PF02786.12|CPSase_L_D2	IPR000022|Carboxyl transferase; IPR000089|Biotin/lipoyl attachment; IPR001882|Biotin-binding site; IPR005479|Carbamoyl-phosphate synthetase large subunit-like, ATP-binding domain; IPR005481|Carbamoyl-phosphate synthase, large subunit, N-terminal; IPR005482|Biotin carboxylase, C-terminal; IPR011761|ATP-grasp fold; IPR011762|Acetyl-coenzyme A carboxyltransferase, N-terminal; IPR011763|Acetyl-coenzy…	GO:0003989|acetyl-CoA carboxylase activity ; GO:0004075|biotin carboxylase activity; GO:0008152|metabolic process ; GO:0005524|ATP binding ; GO:0003824|catalytic activity ; GO:0016874|ligase activity ; GO:0046872|metal ion binding ; GO:0006633|fatty acid biosynthetic process	513	173	161	204	1.56407	-0.340577	2.56	0.5	1	0
Gh_Sca054591G01	scaffold54591	-	86	744	AT1G36160	acetyl-CoA carboxylase 1	Q38970	ACC1_ARATH Acetyl-CoA carboxylase 1 OS=Arabidopsis thaliana GN=ACC1 PE=1 SV=1	B9RJG2	B9RJG2_RICCO Homomeric Acetyl-CoA Carboxylase (Hom-ACCase) OS=Ricinus communis GN=RCOM_1033990 PE=4 SV=1	vvi:100247288	hypothetical protein LOC100247288 ; K01946 biotin carboxylase [EC:6.3.4.14]; K11262 acetyl-CoA carboxylase [EC:6.4.1.2]	PF00364.17|Biotin_lipoyl; PF08326.7|ACC_central	IPR000089|Biotin/lipoyl attachment; IPR001882|Biotin-binding site; IPR013537|Acetyl-CoA carboxylase, central domain	GO:0003989|acetyl-CoA carboxylase activity ; GO:0005524|ATP binding ; GO:0006633|fatty acid biosynthetic process	13	3	3	7	2.09179	-1.22378	1.9	1.1	1	0
Gh_A13G2224	scaffold3564_A13	-	69760	106287	AT2G38040	acetyl Co-enzyme a carboxylase carboxyltransferase alpha subunit	Q9LD43	ACCA_ARATH Acetyl-coenzyme A carboxylase carboxyl transferase subunit alpha, chloroplastic OS=Arabidopsis thaliana GN=CAC3 PE=1 SV=1	A8RWV1	A8RWV1_GOSHI Chloroplast acetyl-CoA carboxylase carboxyltransferase alpha subunit OS=Gossypium hirsutum GN=CTa1 PE=2 SV=1	vvi:100266499	GSVIVT00021457001; hypothetical protein LOC100266499 ; K01962 acetyl-CoA carboxylase carboxyl transferase subunit alpha [EC:6.4.1.2]	PF03255.9|ACCA	IPR001095|Acetyl-CoA carboxylase, alpha subunit; IPR009648|Malonate decarboxylase gamma subunit; IPR011763|Acetyl-coenzyme A carboxyltransferase, C-terminal	GO:0003989|acetyl-CoA carboxylase activity ; GO:0009317|acetyl-CoA carboxylase complex ; GO:0006633|fatty acid biosynthetic process ; GO:0016874|ligase activity	5	13	10	37	-1.27122	-1.87595	0.53	1.35	0	-1
Gh_D10G0709	D10	+	8162520	8172315	AT3G15690	Single hybrid motif superfamily protein			B9GKX5	B9GKX5_POPTR Predicted protein (Fragment) OS=Populus trichocarpa GN=POPTRDRAFT_838715 PE=4 SV=1						7	16	16	35	-1.18823	-1.11638	0.8	1.4	0	-1
Gh_A03G0169	A03	+	2551062	2559237	AT5G35360	acetyl Co-enzyme a carboxylase biotin carboxylase subunit	B9HBA8	ACCC1_POPTR Biotin carboxylase 1, chloroplastic OS=Populus trichocarpa GN=POPTRDRAFT_831870 PE=2 SV=1	A5HJL1	A5HJL1_GOSHI Chloroplast biotin carboxylase OS=Gossypium hirsutum GN=BC1 PE=2 SV=1	nvi:100117061	similar to Methylcrotonoyl-Coenzyme A carboxylase 1 (alpha) ; K01968 3-methylcrotonyl-CoA carboxylase alpha subunit [EC:6.4.1.4]	PF00289.17|CPSase_L_chain; PF02785.14|Biotin_carb_C; PF02786.12|CPSase_L_D2	IPR005479|Carbamoyl-phosphate synthetase large subunit-like, ATP-binding domain; IPR005481|Carbamoyl-phosphate synthase, large subunit, N-terminal; IPR005482|Biotin carboxylase, C-terminal; IPR011761|ATP-grasp fold; IPR011764|Biotin carboxylation domain	GO:0046872|metal ion binding ; GO:0004075|biotin carboxylase activity; GO:0008152|metabolic process ; GO:0005524|ATP binding ; GO:0003824|catalytic activity ; GO:0016874|ligase activity	17	13	24	52	0.363965	-1.1411	0.62	2.76	0	-1
Gh_A09G1749	A09	-	70858724	70862604	AT1G62640	3-ketoacyl-acyl carrier protein synthase III	P49243	FABH_ARATH 3-oxoacyl-[acyl-carrier-protein] synthase III, chloroplastic OS=Arabidopsis thaliana GN=At1g62640 PE=2 SV=2	D9J067	D9J067_GOSHI KASIII OS=Gossypium hirsutum PE=2 SV=1	vvi:100245497	hypothetical protein LOC100245497 ; K00648 3-oxoacyl-[acyl-carrier-protein] synthase III [EC:2.3.1.180]	PF08545.5|ACP_syn_III; PF08541.5|ACP_syn_III_C	IPR013747|3-Oxoacyl-[acyl-carrier-protein (ACP)] synthase III C-terminal; IPR013751|3-Oxoacyl-[acyl-carrier-protein (ACP)] synthase III	GO:0004315|3-oxoacyl-[acyl-carrier-protein] synthase activity ; GO:0016747|transferase activity, transferring acyl groups other than amino-acyl groups ; GO:0006633|fatty acid biosynthetic process ; GO:0008610|lipid biosynthetic process	10	9	15	31	0.22739	-1.07044	0.21	1.87	0	-1
Gh_A11G0242	A11	+	2256456	2259782	AT1G62640	3-ketoacyl-acyl carrier protein synthase III	P49243	FABH_ARATH 3-oxoacyl-[acyl-carrier-protein] synthase III, chloroplastic OS=Arabidopsis thaliana GN=At1g62640 PE=2 SV=2	D9J067	D9J067_GOSHI KASIII OS=Gossypium hirsutum PE=2 SV=1	vvi:100245497	hypothetical protein LOC100245497 ; K00648 3-oxoacyl-[acyl-carrier-protein] synthase III [EC:2.3.1.180]	PF08545.5|ACP_syn_III; PF08541.5|ACP_syn_III_C	IPR013747|3-Oxoacyl-[acyl-carrier-protein (ACP)] synthase III C-terminal; IPR013751|3-Oxoacyl-[acyl-carrier-protein (ACP)] synthase III	GO:0004315|3-oxoacyl-[acyl-carrier-protein] synthase activity ; GO:0016747|transferase activity, transferring acyl groups other than amino-acyl groups ; GO:0006633|fatty acid biosynthetic process ; GO:0008610|lipid biosynthetic process	8	11	11	46	-0.421195	-2.07143	0.24	1.92	0	-1
Gh_D11G0257	D11	+	2197806	2201138	AT1G62640	3-ketoacyl-acyl carrier protein synthase III	P49243	FABH_ARATH 3-oxoacyl-[acyl-carrier-protein] synthase III, chloroplastic OS=Arabidopsis thaliana GN=At1g62640 PE=2 SV=2	D9J067	D9J067_GOSHI KASIII OS=Gossypium hirsutum PE=2 SV=1	ath:AT1G62640	KAS III (3-KETOACYL-ACYL CARRIER PROTEIN SYNTHASE III); 3-oxoacyl-[acyl-carrier-protein] synthase ; K00648 3-oxoacyl-[acyl-carrier-protein] synthase III [EC:2.3.1.180]	PF08545.5|ACP_syn_III; PF08541.5|ACP_syn_III_C	IPR013747|3-Oxoacyl-[acyl-carrier-protein (ACP)] synthase III C-terminal; IPR013751|3-Oxoacyl-[acyl-carrier-protein (ACP)] synthase III	GO:0004315|3-oxoacyl-[acyl-carrier-protein] synthase activity ; GO:0016747|transferase activity, transferring acyl groups other than amino-acyl groups ; GO:0006633|fatty acid biosynthetic process ; GO:0008610|lipid biosynthetic process	9	8	9	31	0.207639	-1.81736	0.16	2.13	0	-1
Gh_D08G2566	D08	+	65344788	65348768	AT1G74960	fatty acid biosynthesis 1	Q9C9P4	KASC2_ARATH 3-oxoacyl-[acyl-carrier-protein] synthase II, chloroplastic OS=Arabidopsis thaliana GN=KAS2 PE=1 SV=1	D9J066	D9J066_GOSHI KASII OS=Gossypium hirsutum PE=2 SV=1	vvi:100262737	similar to beta-ketoacyl-ACP synthase II ; K09458 3-oxoacyl-[acyl-carrier-protein] synthase II [EC:2.3.1.179]	PF00109.21|ketoacyl-synt; PB004305|Pfam-B_4305; PF02801.17|Ketoacyl-synt_C; PB014255|Pfam-B_14255	IPR014030|Beta-ketoacyl synthase, N-terminal; IPR014031|Beta-ketoacyl synthase, C-terminal; IPR018201|Beta-ketoacyl synthase, active site; IPR020841|Polyketide synthase, beta-ketoacyl synthase domain		19	17	19	39	0.210895	-1.03265	0.19	1.44	0	-1
Gh_A11G1407	A11	-	18685692	18690674	AT2G04540	Beta-ketoacyl synthase	Q8L3X9	KASM_ARATH 3-oxoacyl-[acyl-carrier-protein] synthase, mitochondrial OS=Arabidopsis thaliana GN=KAS PE=1 SV=1	D7TEG7	D7TEG7_VITVI 3-oxoacyl-[acyl-carrier-protein] synthase OS=Vitis vinifera GN=VIT_12s0059g01660 PE=3 SV=1	vvi:100244832	hypothetical protein LOC100244832 ; K09458 3-oxoacyl-[acyl-carrier-protein] synthase II [EC:2.3.1.179]	PF00109.21|ketoacyl-synt; PB004305|Pfam-B_4305; PB019440|Pfam-B_19440; PF02801.17|Ketoacyl-synt_C; PB014255|Pfam-B_14255	IPR014030|Beta-ketoacyl synthase, N-terminal; IPR014031|Beta-ketoacyl synthase, C-terminal; IPR018201|Beta-ketoacyl synthase, active site; IPR020841|Polyketide synthase, beta-ketoacyl synthase domain		3	5	8	17	-0.587783	-1.09861	0.55	2.1	0	-1
Gh_A08G0113	A08	+	993164	996534	AT2G05990	NAD(P)-binding Rossmann-fold superfamily protein	Q9SLA8	FABI_ARATH Enoyl-[acyl-carrier-protein] reductase [NADH], chloroplastic OS=Arabidopsis thaliana GN=MOD1 PE=1 SV=1	B9GLM6	B9GLM6_POPTR Predicted protein OS=Populus trichocarpa GN=POPTRDRAFT_639726 PE=4 SV=1	pop:POPTR_639726	hypothetical protein ; K00208 enoyl-[acyl-carrier protein] reductase I [EC:1.3.1.9]	PB003926|Pfam-B_3926; PF13561.1|adh_short_C2	IPR002347|Glucose/ribitol dehydrogenase		44	28	41	84	0.667721	-1.01837	0.76	1.62	0	-1
Gh_A13G1854	A13	+	78204056	78206162	AT2G05990	NAD(P)-binding Rossmann-fold superfamily protein	Q9SLA8	FABI_ARATH Enoyl-[acyl-carrier-protein] reductase [NADH], chloroplastic OS=Arabidopsis thaliana GN=MOD1 PE=1 SV=1	B9GLM6	B9GLM6_POPTR Predicted protein OS=Populus trichocarpa GN=POPTRDRAFT_639726 PE=4 SV=1	pop:POPTR_639726	hypothetical protein ; K00208 enoyl-[acyl-carrier protein] reductase I [EC:1.3.1.9]	PB003926|Pfam-B_3926; PF13561.1|adh_short_C2	IPR002347|Glucose/ribitol dehydrogenase		6	7	4	11	-0.101783	-1.60944	0.08	1.36	0	-1
Gh_D13G2098	D13	+	56456813	56459196	AT1G08510	fatty acyl-ACP thioesterases B	Q9SQI3	FATB_GOSHI Palmitoyl-acyl carrier protein thioesterase, chloroplastic OS=Gossypium hirsutum GN=FATB1 PE=1 SV=1	A7XZV1	A7XZV1_9ROSI Chloroplast acyl-ACP thioesterase OS=Jatropha curcas PE=2 SV=1	pop:POPTR_809202	hypothetical protein ; K10781 fatty acyl-ACP thioesterase B [EC:3.1.2.- 3.1.2.14]	PF12590.3|Acyl-thio_N; PF01643.12|Acyl-ACP_TE	IPR002864|Acyl-ACP thioesterase; IPR021113|Acyl-ACP-thioesterase, N-terminal	GO:0016790|thiolester hydrolase activity ; GO:0006633|fatty acid biosynthetic process	28	26	13	27	0.151477	-1.07729	0.35	1.89	0	-1
Gh_A13G1750	A13	+	76380863	76383241	AT1G08510	fatty acyl-ACP thioesterases B	Q9SQI3	FATB_GOSHI Palmitoyl-acyl carrier protein thioesterase, chloroplastic OS=Gossypium hirsutum GN=FATB1 PE=1 SV=1	A7XZV1	A7XZV1_9ROSI Chloroplast acyl-ACP thioesterase OS=Jatropha curcas PE=2 SV=1	pop:POPTR_809202	hypothetical protein ; K10781 fatty acyl-ACP thioesterase B [EC:3.1.2.- 3.1.2.14]	PF12590.3|Acyl-thio_N; PF01643.12|Acyl-ACP_TE	IPR002864|Acyl-ACP thioesterase; IPR021113|Acyl-ACP-thioesterase, N-terminal	GO:0016790|thiolester hydrolase activity ; GO:0006633|fatty acid biosynthetic process	19	16	6	18	0.241836	-1.51198	0.67	2.34	0	-1
Gh_D08G2090	D08	-	59759220	59762456	AT3G25110	fatA acyl-ACP thioesterase	Q42561	FATA1_ARATH Oleoyl-acyl carrier protein thioesterase 1, chloroplastic OS=Arabidopsis thaliana GN=FATA PE=1 SV=1	F6I751	F6I751_VITVI Putative uncharacterized protein OS=Vitis vinifera GN=VIT_00s0245g00050 PE=2 SV=1	vvi:100248960	hypothetical protein LOC100248960 ; K10782 fatty acyl-ACP thioesterase A [EC:3.1.2.- 3.1.2.14]	PF01643.12|Acyl-ACP_TE	IPR002864|Acyl-ACP thioesterase	GO:0016790|thiolester hydrolase activity ; GO:0006633|fatty acid biosynthetic process	35	31	43	86	0.168922	-1.01987	0.15	1.6	0	-1
Gh_D13G2223	D13	+	58366897	58372351	AT1G55320	acyl-activating enzyme 18	Q84P17	AEE18_ARATH Probable acyl-activating enzyme 18, peroxisomal OS=Arabidopsis thaliana GN=AAE18 PE=2 SV=1	M5W726	M5W726_PRUPE Uncharacterized protein OS=Prunus persica GN=PRUPE_ppa002031mg PE=4 SV=1	vvi:100246794	GSVIVT00024773001; hypothetical protein LOC100246794 ; K01895 acetyl-CoA synthetase [EC:6.2.1.1]	PF00501.23|AMP-binding	IPR000873|AMP-dependent synthetase/ligase; IPR020845|AMP-binding, conserved site	GO:0008152|metabolic process ; GO:0003824|catalytic activity	115	51	26	35	1.17719	-0.42163	3.17	0.88	1	0
Gh_A13G2347	scaffold3706_A13	-	10003	15281	AT1G55320	acyl-activating enzyme 18	Q84P17	AEE18_ARATH Probable acyl-activating enzyme 18, peroxisomal OS=Arabidopsis thaliana GN=AAE18 PE=2 SV=1	D7SLH9	D7SLH9_VITVI Putative uncharacterized protein OS=Vitis vinifera GN=VIT_06s0004g00750 PE=4 SV=1	vvi:100246794	GSVIVT00024773001; hypothetical protein LOC100246794 ; K01895 acetyl-CoA synthetase [EC:6.2.1.1]	PF00501.23|AMP-binding	IPR000873|AMP-dependent synthetase/ligase; IPR020845|AMP-binding, conserved site	GO:0008152|metabolic process ; GO:0003824|catalytic activity	60	29	17	26	1.07992	-0.603151	3.02	1.46	1	0
Gh_A02G1693	A02	-	83147435	83149628	AT2G17650	AMP-dependent synthetase and ligase family protein	Q9SEY5	AAE2_ARATH Probable acyl-activating enzyme 2 OS=Arabidopsis thaliana GN=AAE2 PE=2 SV=1	M5VPK3	M5VPK3_PRUPE Uncharacterized protein OS=Prunus persica GN=PRUPE_ppa021932mg PE=4 SV=1	mbr:MONBRDRAFT_30730	hypothetical protein ; K00666 fatty-acyl-CoA synthase [EC:6.2.1.-]	PF13193.1|AMP-binding_C; PF00501.23|AMP-binding	IPR000873|AMP-dependent synthetase/ligase; IPR020845|AMP-binding, conserved site; IPR025110|AMP-binding enzyme C-terminal domain	GO:0008152|metabolic process ; GO:0003824|catalytic activity	4	9	17	38	-1.30635	-1.11207	0.57	1.52	0	-1
Gh_D10G0649	D10	-	7036560	7043567	AT3G16170	AMP-dependent synthetase and ligase family protein	Q8H151	AAE13_ARATH Malonate--CoA ligase OS=Arabidopsis thaliana GN=AAE13 PE=1 SV=1	D7L5L1	D7L5L1_ARALL Putative uncharacterized protein OS=Arabidopsis lyrata subsp. lyrata GN=ARALYDRAFT_318392 PE=4 SV=1	ago:AGOS_AAR168C	AAR168Cp; K01976	PF13193.1|AMP-binding_C; PF00501.23|AMP-binding	IPR000873|AMP-dependent synthetase/ligase; IPR020845|AMP-binding, conserved site; IPR025110|AMP-binding enzyme C-terminal domain	GO:0008152|metabolic process ; GO:0003824|catalytic activity	59	41	53	120	0.514557	-1.17665	1.43	3.13	0	-1
Gh_D10G2438	scaffold4394_D10	+	46124	62880	AT3G23790	AMP-dependent synthetase and ligase family protein	Q9LK39	AAE16_ARATH Probable acyl-activating enzyme 16, chloroplastic OS=Arabidopsis thaliana GN=AAE16 PE=2 SV=1	D7U8I0	D7U8I0_VITVI Putative uncharacterized protein OS=Vitis vinifera GN=VIT_08s0032g00050 PE=4 SV=1	ath:AT4G14070	AAE15; AAE15 (ACYL-ACTIVATING ENZYME 15); long-chain-fatty-acid-[acyl-carrier-protein] ligase ; K01897 long-chain acyl-CoA synthetase [EC:6.2.1.3]				15	44	26	53	-1.54543	-1.01241	2.03	1.92	-1	-1
Gh_A08G2389	scaffold1941_A08	+	116035	118211	AT3G48990	AMP-dependent synthetase and ligase family protein	Q9SMT7	4CLLA_ARATH 4-coumarate--CoA ligase-like 10 OS=Arabidopsis thaliana GN=4CLL10 PE=2 SV=1	B9RC98	B9RC98_RICCO AMP dependent CoA ligase, putative OS=Ricinus communis GN=RCOM_1686390 PE=4 SV=1	ago:AGOS_AAR168C	AAR168Cp; K01976	PF13193.1|AMP-binding_C; PF00501.23|AMP-binding	IPR000873|AMP-dependent synthetase/ligase; IPR020845|AMP-binding, conserved site; IPR025110|AMP-binding enzyme C-terminal domain	GO:0008152|metabolic process ; GO:0003824|catalytic activity	3	8	45	161	-1.41099	-1.83574	0.27	2.52	0	-1
Gh_D09G1937	D09	+	46809739	46811424	AT5G16340	AMP-dependent synthetase and ligase family protein	Q9FFE6	AAE5_ARATH Probable acyl-activating enzyme 5, peroxisomal OS=Arabidopsis thaliana GN=AAE5 PE=2 SV=1	B9S6X4	B9S6X4_RICCO AMP dependent ligase, putative OS=Ricinus communis GN=RCOM_1328840 PE=4 SV=1	mbr:MONBRDRAFT_30730	hypothetical protein ; K00666 fatty-acyl-CoA synthase [EC:6.2.1.-]	PF13193.1|AMP-binding_C; PF00501.23|AMP-binding	IPR000873|AMP-dependent synthetase/ligase; IPR020845|AMP-binding, conserved site; IPR025110|AMP-binding enzyme C-terminal domain	GO:0008152|metabolic process ; GO:0003824|catalytic activity	27	13	67	57	1.06514	0.236466	1.38	0.76	1	0
Gh_D13G1022	D13	-	27137793	27161760	AT5G35930	AMP-dependent synthetase and ligase family protein	F4K1G2	AEE19_ARATH Putative acyl-activating enzyme 19 OS=Arabidopsis thaliana GN=At5g35930 PE=2 SV=1	B9SDD9	B9SDD9_RICCO AMP dependent ligase, putative OS=Ricinus communis GN=RCOM_1516860 PE=4 SV=1	hsa:132949	AASDH; aminoadipate-semialdehyde dehydrogenase (EC:6.2.1.-); K00142 aminoadipate-semialdehyde dehydrogenase [EC:1.2.1.31]	PF13193.1|AMP-binding_C; PB016596|Pfam-B_16596; PF00501.23|AMP-binding; PF13360.1|PQQ_2; PF01011.16|PQQ	IPR000873|AMP-dependent synthetase/ligase; IPR002372|Pyrrolo-quinoline quinone repeat; IPR006162|Phosphopantetheine attachment site; IPR009081|Acyl carrier protein-like; IPR018391|Pyrrolo-quinoline quinone beta-propeller repeat; IPR020845|AMP-binding, conserved site; IPR025110|AMP-binding enzyme C-terminal domain	GO:0008152|metabolic process ; GO:0003824|catalytic activity	11	25	17	43	-1.23623	-1.31123	1.62	2.22	-1	-1
Gh_A13G2165	scaffold3497_A13	-	404349	431548	AT5G35930	AMP-dependent synthetase and ligase family protein	F4K1G2	AEE19_ARATH Putative acyl-activating enzyme 19 OS=Arabidopsis thaliana GN=At5g35930 PE=2 SV=1	B9SDD9	B9SDD9_RICCO AMP dependent ligase, putative OS=Ricinus communis GN=RCOM_1516860 PE=4 SV=1	hsa:132949	AASDH; aminoadipate-semialdehyde dehydrogenase (EC:6.2.1.-); K00142 aminoadipate-semialdehyde dehydrogenase [EC:1.2.1.31]	PF13193.1|AMP-binding_C; PB016596|Pfam-B_16596; PF00501.23|AMP-binding; PF13360.1|PQQ_2; PF01011.16|PQQ	IPR000873|AMP-dependent synthetase/ligase; IPR002372|Pyrrolo-quinoline quinone repeat; IPR006162|Phosphopantetheine attachment site; IPR009081|Acyl carrier protein-like; IPR018391|Pyrrolo-quinoline quinone beta-propeller repeat; IPR020845|AMP-binding, conserved site; IPR025110|AMP-binding enzyme C-terminal domain	GO:0008152|metabolic process ; GO:0003824|catalytic activity	7	23	16	35	-1.63684	-1.1719	1.23	1.43	0	-1
Gh_A06G0374	A06	+	6072725	6076649	AT1G77590	long chain acyl-CoA synthetase 9	Q9CAP8	LACS9_ARATH Long chain acyl-CoA synthetase 9, chloroplastic OS=Arabidopsis thaliana GN=LACS9 PE=2 SV=1	E0CR69	E0CR69_VITVI Putative uncharacterized protein OS=Vitis vinifera GN=VIT_18s0001g02810 PE=4 SV=1	ath:AT1G77590	LACS9; LACS9 (LONG CHAIN ACYL-COA SYNTHETASE 9); long-chain-fatty-acid-CoA ligase ; K01897 long-chain acyl-CoA synthetase [EC:6.2.1.3]	PB011727|Pfam-B_11727; PF00501.23|AMP-binding	IPR000873|AMP-dependent synthetase/ligase; IPR020845|AMP-binding, conserved site	GO:0008152|metabolic process ; GO:0003824|catalytic activity	23	16	18	42	0.476619	-1.21301	0.6	1.84	0	-1
Gh_A07G1181	A07	-	25966705	25971637	AT2G47240	AMP-dependent synthetase and ligase family protein	O22898	LACS1_ARATH Long chain acyl-CoA synthetase 1 OS=Arabidopsis thaliana GN=LACS1 PE=2 SV=1	B9RNA5	B9RNA5_RICCO Long-chain-fatty-acid CoA ligase, putative OS=Ricinus communis GN=RCOM_1346070 PE=4 SV=1	ath:AT4G23850	long-chain-fatty-acid--CoA ligase / long-chain acyl-CoA synthetase ; K01897 long-chain acyl-CoA synthetase [EC:6.2.1.3]	PB011727|Pfam-B_11727; PF00501.23|AMP-binding	IPR000873|AMP-dependent synthetase/ligase; IPR020845|AMP-binding, conserved site	GO:0008152|metabolic process ; GO:0003824|catalytic activity	142	112	54	164	0.344771	-1.6034	0.63	2	0	-1
Gh_D07G1281	D07	-	20094100	20099033	AT2G47240	AMP-dependent synthetase and ligase family protein	O22898	LACS1_ARATH Long chain acyl-CoA synthetase 1 OS=Arabidopsis thaliana GN=LACS1 PE=2 SV=1	B9RNA5	B9RNA5_RICCO Long-chain-fatty-acid CoA ligase, putative OS=Ricinus communis GN=RCOM_1346070 PE=4 SV=1	ath:AT4G23850	long-chain-fatty-acid--CoA ligase / long-chain acyl-CoA synthetase ; K01897 long-chain acyl-CoA synthetase [EC:6.2.1.3]	PB011727|Pfam-B_11727; PF00501.23|AMP-binding	IPR000873|AMP-dependent synthetase/ligase; IPR020845|AMP-binding, conserved site	GO:0008152|metabolic process ; GO:0003824|catalytic activity	77	91	54	327	-0.236835	-2.59396	0.36	3.17	0	-1
Gh_D12G1163	D12	+	38830945	38832540	AT1G01120	3-ketoacyl-CoA synthase 1	Q9MAM3	KCS1_ARATH 3-ketoacyl-CoA synthase 1 OS=Arabidopsis thaliana GN=KCS1 PE=2 SV=1	M9Z5H7	M9Z5H7_GOSRA 3-ketoacyl-CoA synthase 10 OS=Gossypium raimondii GN=KCS10 PE=4 SV=1	tps:THAPSDRAFT_270141	KAS3; 3-oxoacyl-synthase (EC:2.3.1.41); K00648 3-oxoacyl-[acyl-carrier-protein] synthase III [EC:2.3.1.180]	PF08392.7|FAE1_CUT1_RppA; PF08541.5|ACP_syn_III_C	IPR013601|FAE1/Type III polyketide synthase-like protein; IPR013747|3-Oxoacyl-[acyl-carrier-protein (ACP)] synthase III C-terminal	GO:0016020|membrane ; GO:0016747|transferase activity, transferring acyl groups other than amino-acyl groups ; GO:0006633|fatty acid biosynthetic process ; GO:0008610|lipid biosynthetic process	130	65	49	29	1.01349	0.770472	2.66	1.34	1	0
Gh_A12G1044	A12	+	62445172	62446767	AT1G01120	3-ketoacyl-CoA synthase 1	Q9MAM3	KCS1_ARATH 3-ketoacyl-CoA synthase 1 OS=Arabidopsis thaliana GN=KCS1 PE=2 SV=1	M9Z5H7	M9Z5H7_GOSRA 3-ketoacyl-CoA synthase 10 OS=Gossypium raimondii GN=KCS10 PE=4 SV=1	tps:THAPSDRAFT_270141	KAS3; 3-oxoacyl-synthase (EC:2.3.1.41); K00648 3-oxoacyl-[acyl-carrier-protein] synthase III [EC:2.3.1.180]	PF08392.7|FAE1_CUT1_RppA; PF08541.5|ACP_syn_III_C	IPR013601|FAE1/Type III polyketide synthase-like protein; IPR013747|3-Oxoacyl-[acyl-carrier-protein (ACP)] synthase III C-terminal	GO:0016020|membrane ; GO:0016747|transferase activity, transferring acyl groups other than amino-acyl groups ; GO:0006633|fatty acid biosynthetic process ; GO:0008610|lipid biosynthetic process	78	38	43	26	1.01915	0.722403	1.63	0.85	1	0
Gh_D07G1331	D07	-	21372463	21374058	AT1G01120	3-ketoacyl-CoA synthase 1	Q9MAM3	KCS1_ARATH 3-ketoacyl-CoA synthase 1 OS=Arabidopsis thaliana GN=KCS1 PE=2 SV=1	M9ZC07	M9ZC07_GOSRA 3-ketoacyl-CoA synthase 17 OS=Gossypium raimondii GN=KCS17 PE=4 SV=1	tps:THAPSDRAFT_270141	KAS3; 3-oxoacyl-synthase (EC:2.3.1.41); K00648 3-oxoacyl-[acyl-carrier-protein] synthase III [EC:2.3.1.180]	PF08392.7|FAE1_CUT1_RppA; PF08541.5|ACP_syn_III_C	IPR013601|FAE1/Type III polyketide synthase-like protein; IPR013747|3-Oxoacyl-[acyl-carrier-protein (ACP)] synthase III C-terminal	GO:0016020|membrane ; GO:0016747|transferase activity, transferring acyl groups other than amino-acyl groups ; GO:0006633|fatty acid biosynthetic process ; GO:0008610|lipid biosynthetic process	1	2	22	10	-1.09861	1.17271	0.2	1.32	0	1
Gh_A06G1558	A06	+	99993309	99994703	AT5G04530	3-ketoacyl-CoA synthase 19	Q9LZ72	KCS21_ARATH 3-ketoacyl-CoA synthase 21 OS=Arabidopsis thaliana GN=KCS21 PE=2 SV=1	M9ZC21	M9ZC21_GOSRA 3-ketoacyl-CoA synthase 15 OS=Gossypium raimondii GN=KCS15 PE=4 SV=1	sbi:SORBI_05g019870	SORBIDRAFT_05g019870; hypothetical protein ; K00660 chalcone synthase [EC:2.3.1.74]	PF08392.7|FAE1_CUT1_RppA; PF08541.5|ACP_syn_III_C	IPR013601|FAE1/Type III polyketide synthase-like protein; IPR013747|3-Oxoacyl-[acyl-carrier-protein (ACP)] synthase III C-terminal	GO:0016020|membrane ; GO:0016747|transferase activity, transferring acyl groups other than amino-acyl groups ; GO:0006633|fatty acid biosynthetic process ; GO:0008610|lipid biosynthetic process	101	50	1	2	1.01096	-0.693158	2.1	0.07	1	0
Gh_Sca144453G01	scaffold144453	+	96	353	AT5G04530	3-ketoacyl-CoA synthase 19	Q9LZ72	KCS21_ARATH 3-ketoacyl-CoA synthase 21 OS=Arabidopsis thaliana GN=KCS21 PE=2 SV=1	M9ZC21	M9ZC21_GOSRA 3-ketoacyl-CoA synthase 15 OS=Gossypium raimondii GN=KCS15 PE=4 SV=1			PF08392.7|FAE1_CUT1_RppA	IPR013601|FAE1/Type III polyketide synthase-like protein	GO:0016020|membrane ; GO:0016747|transferase activity, transferring acyl groups other than amino-acyl groups ; GO:0006633|fatty acid biosynthetic process	65	27	1	1	1.2865	-0.405465	1.9	0.04	1	0
Gh_A08G0514	A08	+	7716960	7718474	AT2G44620	mitochondrial acyl carrier protein 1	P53665	ACPM1_ARATH Acyl carrier protein 1, mitochondrial OS=Arabidopsis thaliana GN=MTACP1 PE=2 SV=1	M5X145	M5X145_PRUPE Uncharacterized protein OS=Prunus persica GN=PRUPE_ppa013401mg PE=4 SV=1	vvi:100246253	GSVIVT00018992001; hypothetical protein LOC100246253 ; K03955 NADH dehydrogenase (ubiquinone) 1 alpha/beta subcomplex 1 [EC:1.6.5.3 1.6.99.3]	PF00550.20|PP-binding	IPR003231|Acyl carrier protein (ACP); IPR009081|Acyl carrier protein-like	GO:0006633|fatty acid biosynthetic process	33	15	39	79	1.15427	-1.00339	1.15	1.86	0	-1
Gh_D13G1868	D13	+	53781726	53788558	AT3G05420	acyl-CoA binding protein 4	Q9MA55	ACBP4_ARATH Acyl-CoA-binding domain-containing protein 4 OS=Arabidopsis thaliana GN=ACBP4 PE=1 SV=1	B9RF93	B9RF93_RICCO Acyl-CoA binding protein, putative OS=Ricinus communis GN=RCOM_1432720 PE=4 SV=1	nve:NEMVE_v1g100198	hypothetical protein ; K10317 F-box protein 42	PF13415.1|Kelch_3; PF13854.1|Kelch_5; PF00887.14|ACBP; PB009301|Pfam-B_9301	IPR000582|Acyl-CoA-binding protein, ACBP	GO:0000062|fatty-acyl-CoA binding	16	20	25	54	-0.344451	-1.10494	0.63	2.69	0	-1
Gh_A10G1284	A10	-	67102494	67107801	AT2G43710	Plant stearoyl-acyl-carrier-protein desaturase family protein	P22337	STAD_RICCO Acyl-[acyl-carrier-protein] desaturase, chloroplastic OS=Ricinus communis PE=1 SV=1	B9T0X0	B9T0X0_RICCO Acyl-[acyl-carrier-protein] desaturase OS=Ricinus communis GN=RCOM_1238330 PE=3 SV=1	ath:AT3G02630	acyl-(acyl-carrier-protein) desaturase, putative / stearoyl-ACP desaturase, putative ; K03921 acyl-[acyl-carrier-protein] desaturase [EC:1.14.19.2]	PF03405.9|FA_desaturase_2	IPR005067|Fatty acid desaturase, type 2	GO:0045300|acyl-[acyl-carrier-protein] desaturase activity ; GO:0006631|fatty acid metabolic process ; GO:0055114|oxidation-reduction process	6	13	2	6	-1.01473	-1.64862	1.38	1	-1	0
Gh_A10G0106	A10	+	872273	877140	AT4G04320	malonyl-CoA decarboxylase family protein	O95822	DCMC_HUMAN Malonyl-CoA decarboxylase, mitochondrial OS=Homo sapiens GN=MLYCD PE=1 SV=3	E0CVN3	E0CVN3_VITVI Putative uncharacterized protein OS=Vitis vinifera GN=VIT_10s0116g00870 PE=4 SV=1	vvi:100246958	hypothetical protein LOC100246958 ; K01578 malonyl-CoA decarboxylase [EC:4.1.1.9]	PF05292.6|MCD	IPR007956|Malonyl-CoA decarboxylase	GO:0050080|malonyl-CoA decarboxylase activity ; GO:0006633|fatty acid biosynthetic process	12	14	24	49	-0.259109	-1.0351	0.15	1.45	0	-1
Gh_A05G1243	A05	+	12577550	12580152	AT2G34590	Transketolase family protein	O64688	ODPB3_ARATH Pyruvate dehydrogenase E1 component subunit beta-3, chloroplastic OS=Arabidopsis thaliana GN=E1-BETA-2 PE=2 SV=1	B9S0Z5	B9S0Z5_RICCO Pyruvate dehydrogenase, putative OS=Ricinus communis GN=RCOM_0632150 PE=4 SV=1	pop:POPTR_668506	hypothetical protein ; K00162 pyruvate dehydrogenase E1 component subunit beta [EC:1.2.4.1]	PF02780.15|Transketolase_C; PF02779.19|Transket_pyr	IPR005475|Transketolase-like, pyrimidine-binding domain; IPR005476|Transketolase, C-terminal	GO:0008152|metabolic process ; GO:0003824|catalytic activity	41	19	30	48	1.09629	-0.685712	1.65	1.37	1	0
Gh_D05G1406	D05	+	12511807	12514403	AT2G34590	Transketolase family protein	O64688	ODPB3_ARATH Pyruvate dehydrogenase E1 component subunit beta-3, chloroplastic OS=Arabidopsis thaliana GN=E1-BETA-2 PE=2 SV=1	B9S0Z5	B9S0Z5_RICCO Pyruvate dehydrogenase, putative OS=Ricinus communis GN=RCOM_0632150 PE=4 SV=1	ath:AT2G34590	transketolase family protein ; K00162 pyruvate dehydrogenase E1 component subunit beta [EC:1.2.4.1]	PF02780.15|Transketolase_C; PF02779.19|Transket_pyr	IPR005475|Transketolase-like, pyrimidine-binding domain; IPR005476|Transketolase, C-terminal	GO:0008152|metabolic process ; GO:0003824|catalytic activity	39	20	29	45	1.00533	-0.64755	1.32	1.08	1	0
Gh_A08G1185	A08	-	81823478	81826154	AT2G46090	Diacylglycerol kinase family protein	O82359	LCKB2_ARATH Sphingoid long-chain bases kinase 2, mitochondrial OS=Arabidopsis thaliana GN=LCKB2 PE=2 SV=1	M5WZY9	M5WZY9_PRUPE Uncharacterized protein OS=Prunus persica GN=PRUPE_ppa007544mg PE=4 SV=1	vvi:100246487	hypothetical protein LOC100246487 ; K07029	PF00781.19|DAGK_cat; PB001500|Pfam-B_1500; PB017401|Pfam-B_17401	IPR001206|Diacylglycerol kinase, catalytic domain	GO:0004143|diacylglycerol kinase activity ; GO:0007205|protein kinase C-activating G-protein coupled receptor signaling pathway	12	9	11	23	0.336472	-1.11487	0.57	2.22	0	-1
Gh_D04G0605	D04	+	10821266	10822804	AT3G11430	glycerol-3-phosphate acyltransferase 5	Q9CAY3	GPAT5_ARATH Glycerol-3-phosphate acyltransferase 5 OS=Arabidopsis thaliana GN=GPAT5 PE=1 SV=1	B9HTG4	B9HTG4_POPTR Predicted protein OS=Populus trichocarpa GN=POPTRDRAFT_805502 PE=4 SV=1			PB001661|Pfam-B_1661; PF01553.16|Acyltransferase	IPR002123|Phospholipid/glycerol acyltransferase	GO:0016746|transferase activity, transferring acyl groups ; GO:0008152|metabolic process	1	2	62	21	-0.916291	1.57097	0.07	1.45	0	1
Gh_A05G3037	A05	-	78024613	78026151	AT3G11430	glycerol-3-phosphate acyltransferase 5	Q9CAY3	GPAT5_ARATH Glycerol-3-phosphate acyltransferase 5 OS=Arabidopsis thaliana GN=GPAT5 PE=1 SV=1	B9HTG4	B9HTG4_POPTR Predicted protein OS=Populus trichocarpa GN=POPTRDRAFT_805502 PE=4 SV=1			PB001661|Pfam-B_1661; PF01553.16|Acyltransferase	IPR002123|Phospholipid/glycerol acyltransferase	GO:0016746|transferase activity, transferring acyl groups ; GO:0008152|metabolic process	1	1	46	13	-0.405465	1.79769	0.03	1.31	0	1
Gh_D12G2555	D12	-	58430118	58434672	AT3G18000	S-adenosyl-L-methionine-dependent methyltransferases superfamily protein	Q9FR44	PEAM1_ARATH Phosphoethanolamine N-methyltransferase 1 OS=Arabidopsis thaliana GN=NMT1 PE=2 SV=1	B9T1H8	B9T1H8_RICCO Phosphoethanolamine n-methyltransferase, putative OS=Ricinus communis GN=RCOM_0161380 PE=4 SV=1	pfa:MAL13P1.214	phosphoethanolamine N-methyltransferase (EC:2.1.1.103); K05929 phosphoethanolamine N-methyltransferase [EC:2.1.1.103]	PF13489.1|Methyltransf_23; PF13847.1|Methyltransf_31	IPR013216|Methyltransferase type 11; IPR025771|Phosphoethanolamine N-methyltransferase	GO:0000234|phosphoethanolamine N-methyltransferase activity; GO:0008152|metabolic process ; GO:0008168|methyltransferase activity ; GO:0006656|phosphatidylcholine biosynthetic process	23	42	16	35	-0.902868	-1.10444	2.32	2.32	0	-1
Gh_A12G2430	A12	-	86779900	86784401	AT3G18000	S-adenosyl-L-methionine-dependent methyltransferases superfamily protein	Q9FR44	PEAM1_ARATH Phosphoethanolamine N-methyltransferase 1 OS=Arabidopsis thaliana GN=NMT1 PE=2 SV=1	B9T1H8	B9T1H8_RICCO Phosphoethanolamine n-methyltransferase, putative OS=Ricinus communis GN=RCOM_0161380 PE=4 SV=1	pfa:MAL13P1.214	phosphoethanolamine N-methyltransferase (EC:2.1.1.103); K05929 phosphoethanolamine N-methyltransferase [EC:2.1.1.103]	PF13489.1|Methyltransf_23; PF13847.1|Methyltransf_31	IPR025714|Methyltransferase domain; IPR025771|Phosphoethanolamine N-methyltransferase	GO:0000234|phosphoethanolamine N-methyltransferase activity; GO:0006656|phosphatidylcholine biosynthetic process	16	37	12	29	-1.25006	-1.30184	1.9	1.68	-1	-1
Gh_A11G2987	scaffold2726_A11	-	85575	89619	AT1G32200	phospholipid/glycerol acyltransferase family protein	Q39639	PLSB_CUCSA Glycerol-3-phosphate acyltransferase, chloroplastic OS=Cucumis sativus PE=2 SV=1	D7TTQ8	D7TTQ8_VITVI Putative uncharacterized protein OS=Vitis vinifera GN=VIT_02s0012g02160 PE=4 SV=1	cre:CHLREDRAFT_205741	PLSB1; glycerol-3-phosphate acyltransferase (EC:2.3.1.15); K00630 glycerol-3-phosphate O-acyltransferase [EC:2.3.1.15]	PF14829.1|GPAT_N; PF01553.16|Acyltransferase	IPR002123|Phospholipid/glycerol acyltransferase	GO:0016746|transferase activity, transferring acyl groups ; GO:0008152|metabolic process	15	10	10	20	0.644829	-1.04034	1.56	2.36	0	-1
Gh_A03G1948	scaffold496_A03	+	45464	51022	AT1G32200	phospholipid/glycerol acyltransferase family protein	Q39639	PLSB_CUCSA Glycerol-3-phosphate acyltransferase, chloroplastic OS=Cucumis sativus PE=2 SV=1	Q8W3L0	Q8W3L0_CITUN Glycerol-3-phosphate acyltransferase OS=Citrus unshiu GN=Cit-GPAT PE=2 SV=1	cre:CHLREDRAFT_205741	PLSB1; glycerol-3-phosphate acyltransferase (EC:2.3.1.15); K00630 glycerol-3-phosphate O-acyltransferase [EC:2.3.1.15]	PF14829.1|GPAT_N; PF01553.16|Acyltransferase	IPR002123|Phospholipid/glycerol acyltransferase	GO:0016746|transferase activity, transferring acyl groups ; GO:0008152|metabolic process	5	6	12	25	-0.122605	-1.09854	0.06	1.41	0	-1
Gh_D03G1661	D03	+	46629378	46634196	AT1G32200	phospholipid/glycerol acyltransferase family protein	P10349	PLSB_CUCMO Glycerol-3-phosphate acyltransferase, chloroplastic OS=Cucurbita moschata PE=1 SV=1	D7TTQ8	D7TTQ8_VITVI Putative uncharacterized protein OS=Vitis vinifera GN=VIT_02s0012g02160 PE=4 SV=1	cre:CHLREDRAFT_205741	PLSB1; glycerol-3-phosphate acyltransferase (EC:2.3.1.15); K00630 glycerol-3-phosphate O-acyltransferase [EC:2.3.1.15]	PF14829.1|GPAT_N; PF01553.16|Acyltransferase	IPR002123|Phospholipid/glycerol acyltransferase	GO:0016746|transferase activity, transferring acyl groups ; GO:0008152|metabolic process	5	5	12	24	-1.75602e-08	-1.03277	0	2.88	0	-1
Gh_D08G1683	D08	-	52638770	52645877	AT1G32200	phospholipid/glycerol acyltransferase family protein	Q39639	PLSB_CUCSA Glycerol-3-phosphate acyltransferase, chloroplastic OS=Cucumis sativus PE=2 SV=1	D7TTQ8	D7TTQ8_VITVI Putative uncharacterized protein OS=Vitis vinifera GN=VIT_02s0012g02160 PE=4 SV=1	cre:CHLREDRAFT_205741	PLSB1; glycerol-3-phosphate acyltransferase (EC:2.3.1.15); K00630 glycerol-3-phosphate O-acyltransferase [EC:2.3.1.15]	PF14829.1|GPAT_N; PF01553.16|Acyltransferase	IPR002123|Phospholipid/glycerol acyltransferase	GO:0016746|transferase activity, transferring acyl groups ; GO:0008152|metabolic process	3	6	6	19	-1.09861	-1.60224	0.8	2.02	0	-1
Gh_D07G0353	D07	-	3684269	3688964	AT2G26830	Protein kinase superfamily protein	Q869T9	EKIA_DICDI Probable ethanolamine kinase A OS=Dictyostelium discoideum GN=etnkA PE=3 SV=1	A5BHH1	A5BHH1_VITVI Putative uncharacterized protein OS=Vitis vinifera GN=VITISV_011672 PE=4 SV=1	ddi:DDBDRAFT_0217566	hypothetical protein ; K00894 ethanolamine kinase [EC:2.7.1.82]	PB015017|Pfam-B_15017; PF01633.15|Choline_kinase	IPR026712|Choline/Ethanolamine kinase	GO:0016301|kinase activity ; GO:0046474|glycerophospholipid biosynthetic process	26	18	17	39	0.53571	-1.19469	0.73	1.71	0	-1
Gh_D10G0092	D10	+	703405	711641	AT1G62430	CDP-diacylglycerol synthase 1	O04928	CDS1_ARATH Phosphatidate cytidylyltransferase OS=Arabidopsis thaliana GN=CDS1 PE=2 SV=1	B9RXC8	B9RXC8_RICCO Phosphatidate cytidylyltransferase OS=Ricinus communis GN=RCOM_0902650 PE=3 SV=1	pop:POPTR_837467	hypothetical protein ; K00981 phosphatidate cytidylyltransferase [EC:2.7.7.41]	PF04720.7|DUF506; PF01148.15|CTP_transf_1	IPR000374|Phosphatidate cytidylyltransferase; IPR006502|Protein of unknown function DUF506, plant	GO:0016020|membrane ; GO:0016772|transferase activity, transferring phosphorus-containing groups	3	8	21	36	-1.20397	-0.764183	1.35	2.5	-1	0
Gh_A06G1753	A06	+	102647553	102651565	AT4G22340	cytidinediphosphate diacylglycerol synthase 2	O04928	CDS1_ARATH Phosphatidate cytidylyltransferase OS=Arabidopsis thaliana GN=CDS1 PE=2 SV=1	B9RXC8	B9RXC8_RICCO Phosphatidate cytidylyltransferase OS=Ricinus communis GN=RCOM_0902650 PE=3 SV=1	vvi:100265735	GSVIVT00005252001; hypothetical protein LOC100265735 ; K00981 phosphatidate cytidylyltransferase [EC:2.7.7.41]	PF01148.15|CTP_transf_1	IPR000374|Phosphatidate cytidylyltransferase	GO:0016020|membrane ; GO:0016772|transferase activity, transferring phosphorus-containing groups	4	5	6	16	-0.223144	-1.43508	0.17	1.92	0	-1
Gh_D08G0285	D08	-	2784060	2787068	AT4G22340	cytidinediphosphate diacylglycerol synthase 2	O04940	CDS1_SOLTU Phosphatidate cytidylyltransferase OS=Solanum tuberosum GN=CDS1 PE=2 SV=1	D7T839	D7T839_VITVI Phosphatidate cytidylyltransferase OS=Vitis vinifera GN=VIT_19s0090g01220 PE=3 SV=1	vvi:100262389	hypothetical protein LOC100262389 ; K00981 phosphatidate cytidylyltransferase [EC:2.7.7.41]	PF01148.15|CTP_transf_1	IPR000374|Phosphatidate cytidylyltransferase	GO:0016020|membrane ; GO:0016772|transferase activity, transferring phosphorus-containing groups	5	4	6	13	0.318454	-1.17557	0.34	1.93	0	-1
Gh_A03G0225	A03	+	3419435	3422165	AT5G58560	Phosphatidate cytidylyltransferase family protein	Q2N2K0	PHYK3_SOYBN Probable phytol kinase 3, chloroplastic OS=Glycine max PE=2 SV=1	B9HNC4	B9HNC4_POPTR Predicted protein OS=Populus trichocarpa GN=POPTRDRAFT_557647 PE=2 SV=1	cgr:CAGL0M07700g	hypothetical protein ; K00902 dolichol kinase [EC:2.7.1.108]	PF01148.15|CTP_transf_1	IPR000374|Phosphatidate cytidylyltransferase	GO:0016020|membrane ; GO:0016772|transferase activity, transferring phosphorus-containing groups	4	8	8	16	-0.9986	-1.07187	1.98	2.9	0	-1
Gh_A01G1401	A01	+	88064610	88066696	AT1G68000	phosphatidylinositol synthase 1	Q8LBA6	PIS1_ARATH CDP-diacylglycerol--inositol 3-phosphatidyltransferase 1 OS=Arabidopsis thaliana GN=PIS1 PE=1 SV=2	Q8LK57	Q8LK57_BRANA Phosphatidylinositol synthase OS=Brassica napus PE=2 SV=1	ath:AT1G68000	ATPIS1; ATPIS1 (Arabidopsis thaliana phosphatidylinositol synthase 1); CDP-diacylglycerol-inositol 3-phosphatidyltransferase ; K00999 CDP-diacylglycerol--inositol 3-phosphatidyltransferase [EC:2.7.8.11]	PF01066.16|CDP-OH_P_transf	IPR000462|CDP-alcohol phosphatidyltransferase	GO:0016020|membrane ; GO:0008654|phospholipid biosynthetic process ; GO:0016780|phosphotransferase activity, for other substituted phosphate groups	8	8	14	32	0.0246911	-1.17272	0.02	2.41	0	-1
Gh_D01G1642	D01	+	52030056	52032104	AT1G68000	phosphatidylinositol synthase 1	Q8LBA6	PIS1_ARATH CDP-diacylglycerol--inositol 3-phosphatidyltransferase 1 OS=Arabidopsis thaliana GN=PIS1 PE=1 SV=2	Q8LK57	Q8LK57_BRANA Phosphatidylinositol synthase OS=Brassica napus PE=2 SV=1	ath:AT1G68000	ATPIS1; ATPIS1 (Arabidopsis thaliana phosphatidylinositol synthase 1); CDP-diacylglycerol-inositol 3-phosphatidyltransferase ; K00999 CDP-diacylglycerol--inositol 3-phosphatidyltransferase [EC:2.7.8.11]	PF01066.16|CDP-OH_P_transf	IPR000462|CDP-alcohol phosphatidyltransferase	GO:0016020|membrane ; GO:0008654|phospholipid biosynthetic process ; GO:0016780|phosphotransferase activity, for other substituted phosphate groups	6	4	14	38	0.498991	-1.41046	0.34	2.44	0	-1
Gh_A12G1648	A12	-	77821625	77826563	AT5G07920	diacylglycerol kinase1	Q39017	DGK1_ARATH Diacylglycerol kinase 1 OS=Arabidopsis thaliana GN=DGK1 PE=1 SV=2	M5WXK0	M5WXK0_PRUPE Uncharacterized protein OS=Prunus persica GN=PRUPE_ppa002021mg PE=4 SV=1	pop:POPTR_834296	hypothetical protein ; K00901 diacylglycerol kinase [EC:2.7.1.107]	PF00781.19|DAGK_cat; PF00609.14|DAGK_acc; PF00130.17|C1_1	IPR000756|Diacylglycerol kinase, accessory domain; IPR001206|Diacylglycerol kinase, catalytic domain; IPR002219|Protein kinase C-like, phorbol ester/diacylglycerol binding	GO:0004143|diacylglycerol kinase activity ; GO:0007205|protein kinase C-activating G-protein coupled receptor signaling pathway ; GO:0035556|intracellular signal transduction	10	9	11	27	0.122602	-1.35715	0.07	1.5	0	-1
Gh_A08G1479	A08	+	91021701	91033946	AT4G29890	choline monooxygenase, putative (CMO-like)	Q9SZR0	CHMO_ARATH Choline monooxygenase, chloroplastic OS=Arabidopsis thaliana GN=At4g29890 PE=2 SV=2	M7YJG9	M7YJG9_TRIUA Choline monooxygenase, chloroplastic OS=Triticum urartu GN=TRIUR3_23657 PE=4 SV=1	ath:AT4G29890	choline monooxygenase, putative (CMO-like) ; K00499 choline monooxygenase [EC:1.14.15.7]	PF00848.14|Ring_hydroxyl_A	IPR015879|Aromatic-ring-hydroxylating dioxygenase, alpha subunit, C-terminal domain	GO:0051537|2 iron, 2 sulfur cluster binding ; GO:0019439|aromatic compound catabolic process ; GO:0016708|oxidoreductase activity, acting on paired donors, with incorporation or reduction of molecular oxygen, NAD(P)H as one donor, and incorporation of two atoms of oxygen into one donor ; GO:0005506|iron ion binding ; GO:0055114|oxidation-reduction process	6	15	10	33	-1.25276	-1.76903	0.72	1.47	0	-1
Gh_A06G0697	A06	+	19224876	19229025	AT4G29890	choline monooxygenase, putative (CMO-like)	Q9SZR0	CHMO_ARATH Choline monooxygenase, chloroplastic OS=Arabidopsis thaliana GN=At4g29890 PE=2 SV=2	M7YJG9	M7YJG9_TRIUA Choline monooxygenase, chloroplastic OS=Triticum urartu GN=TRIUR3_23657 PE=4 SV=1	ath:AT4G29890	choline monooxygenase, putative (CMO-like) ; K00499 choline monooxygenase [EC:1.14.15.7]	PF00848.14|Ring_hydroxyl_A; PF00400.27|WD40	IPR001680|WD40 repeat; IPR015879|Aromatic-ring-hydroxylating dioxygenase, alpha subunit, C-terminal domain; IPR017986|WD40-repeat-containing domain; IPR019775|WD40 repeat, conserved site	GO:0051537|2 iron, 2 sulfur cluster binding ; GO:0019439|aromatic compound catabolic process ; GO:0016708|oxidoreductase activity, acting on paired donors, with incorporation or reduction of molecular oxygen, NAD(P)H as one donor, and incorporation of two atoms of oxygen into one donor ; GO:0005515|protein binding ; GO:0005506|iron ion binding ; GO:0055114|oxidation-reduction process	5	11	10	39	-1.00764	-1.96647	0.45	1.59	0	-1
Gh_D04G0121	D04	+	1630710	1633233	AT2G40690	NAD-dependent glycerol-3-phosphate dehydrogenase family protein	Q949Q0	GPDA2_ARATH Glycerol-3-phosphate dehydrogenase [NAD(+)] 2, chloroplastic OS=Arabidopsis thaliana GN=GLY1 PE=1 SV=1	I1JH49	I1JH49_SOYBN Uncharacterized protein OS=Glycine max PE=3 SV=1	cre:CHLREDRAFT_80188	hypothetical protein ; K00057 glycerol-3-phosphate dehydrogenase (NAD(P)+) [EC:1.1.1.94]	PF07479.9|NAD_Gly3P_dh_C; PF01210.18|NAD_Gly3P_dh_N	IPR006109|Glycerol-3-phosphate dehydrogenase, NAD-dependent, C-terminal; IPR006168|Glycerol-3-phosphate dehydrogenase, NAD-dependent; IPR011128|Glycerol-3-phosphate dehydrogenase, NAD-dependent, N-terminal	GO:0016614|oxidoreductase activity, acting on CH-OH group of donors ; GO:0016616|oxidoreductase activity, acting on the CH-OH group of donors, NAD or NADP as acceptor ; GO:0046168|glycerol-3-phosphate catabolic process ; GO:0051287|NAD binding ; GO:0055114|oxidation-reduction process ; GO:0005737|cytoplasm ; GO:0004367|glycerol-3-phosphate dehydrogenase [NAD+] activity; GO:0006072|glycerol-3-phos…	5	5	6	14	0.0909195	-1.21511	0.13	2.52	0	-1
Gh_A05G3772	scaffold1219_A05	+	12842	15335	AT2G40690	NAD-dependent glycerol-3-phosphate dehydrogenase family protein	Q949Q0	GPDA2_ARATH Glycerol-3-phosphate dehydrogenase [NAD(+)] 2, chloroplastic OS=Arabidopsis thaliana GN=GLY1 PE=1 SV=1	I1JH49	I1JH49_SOYBN Uncharacterized protein OS=Glycine max PE=3 SV=1	cre:CHLREDRAFT_80188	hypothetical protein ; K00057 glycerol-3-phosphate dehydrogenase (NAD(P)+) [EC:1.1.1.94]	PF07479.9|NAD_Gly3P_dh_C; PF01210.18|NAD_Gly3P_dh_N	IPR006109|Glycerol-3-phosphate dehydrogenase, NAD-dependent, C-terminal; IPR006168|Glycerol-3-phosphate dehydrogenase, NAD-dependent; IPR011128|Glycerol-3-phosphate dehydrogenase, NAD-dependent, N-terminal	GO:0016614|oxidoreductase activity, acting on CH-OH group of donors ; GO:0016616|oxidoreductase activity, acting on the CH-OH group of donors, NAD or NADP as acceptor ; GO:0046168|glycerol-3-phosphate catabolic process ; GO:0051287|NAD binding ; GO:0055114|oxidation-reduction process ; GO:0005737|cytoplasm ; GO:0004367|glycerol-3-phosphate dehydrogenase [NAD+] activity; GO:0006072|glycerol-3-phos…	3	4	6	16	-0.374694	-1.28663	0.25	1.8	0	-1
Gh_A06G1394	A06	-	96129785	96132536	AT2G41540	6-phosphogluconate dehydrogenase family protein	Q8S2G5	GPDH2_ORYSJ Probable glycerol-3-phosphate dehydrogenase [NAD(+)] 2, cytosolic OS=Oryza sativa subsp. japonica GN=Os01g0801600 PE=2 SV=1	B9RGG7	B9RGG7_RICCO Glycerol-3-phosphate dehydrogenase, putative OS=Ricinus communis GN=RCOM_1454000 PE=3 SV=1	ecb:100052204	similar to Glycerol-3-phosphate dehydrogenase [NAD+], cytoplasmic (GPD-C) (GPDH-C) ; K00006 glycerol-3-phosphate dehydrogenase (NAD+) [EC:1.1.1.8]	PF07479.9|NAD_Gly3P_dh_C; PF01210.18|NAD_Gly3P_dh_N	IPR006109|Glycerol-3-phosphate dehydrogenase, NAD-dependent, C-terminal; IPR006168|Glycerol-3-phosphate dehydrogenase, NAD-dependent; IPR011128|Glycerol-3-phosphate dehydrogenase, NAD-dependent, N-terminal	GO:0016614|oxidoreductase activity, acting on CH-OH group of donors ; GO:0016616|oxidoreductase activity, acting on the CH-OH group of donors, NAD or NADP as acceptor ; GO:0046168|glycerol-3-phosphate catabolic process ; GO:0051287|NAD binding ; GO:0055114|oxidation-reduction process ; GO:0005737|cytoplasm ; GO:0004367|glycerol-3-phosphate dehydrogenase [NAD+] activity; GO:0006072|glycerol-3-phos…	25	18	24	49	0.449268	-1.06489	0.59	1.84	0	-1
Gh_A10G1331	A10	+	70924658	70925161	AT5G59320	lipid transfer protein 3	Q43129	NLTP2_GOSHI Non-specific lipid-transfer protein OS=Gossypium hirsutum PE=2 SV=1	Q9M6B6	Q9M6B6_GOSHI Non-specific lipid-transfer protein (Precursor) OS=Gossypium hirsutum GN=FSltp3 PE=2 SV=1			PF00234.17|Tryp_alpha_amyl	IPR000528|Plant lipid transfer protein/Par allergen; IPR016140|Bifunctional inhibitor/plant lipid transfer protein/seed storage helical domain	GO:0008289|lipid binding ; GO:0006869|lipid transport	480	217	68	164	1.14344	-1.25669	1.46	0.69	1	0
Gh_D05G2422	D05	-	24268402	24270977	AT1G76150	enoyl-CoA hydratase 2	Q8VYI3	ECH2_ARATH Enoyl-CoA hydratase 2, peroxisomal OS=Arabidopsis thaliana GN=ECH2 PE=1 SV=1	B9H5E2	B9H5E2_POPTR Predicted protein OS=Populus trichocarpa GN=POPTRDRAFT_652170 PE=4 SV=1	mbr:MONBRDRAFT_23152	hypothetical protein ; K12405 3-hydroxyacyl-CoA dehydrogenase / 3a,7a,12a-trihydroxy-5b-cholest-24-enoyl-CoA hydratase [EC:1.1.1.35 4.2.1.107]	PF13452.1|MaoC_dehydrat_N; PF01575.14|MaoC_dehydratas	IPR002539|MaoC-like domain; IPR027090|Enoyl-CoA hydratase 2	GO:0008152|metabolic process ; GO:0016491|oxidoreductase activity	20	18	42	86	0.182322	-1.05385	0.21	2.56	0	-1
Gh_D11G1695	D11	+	18430160	18432935	AT1G76150	enoyl-CoA hydratase 2	Q8VYI3	ECH2_ARATH Enoyl-CoA hydratase 2, peroxisomal OS=Arabidopsis thaliana GN=ECH2 PE=1 SV=1	M8BCU6	M8BCU6_AEGTA Peroxisomal multifunctional enzyme type 2 OS=Aegilops tauschii GN=F775_08460 PE=4 SV=1	mbr:MONBRDRAFT_23152	hypothetical protein ; K12405 3-hydroxyacyl-CoA dehydrogenase / 3a,7a,12a-trihydroxy-5b-cholest-24-enoyl-CoA hydratase [EC:1.1.1.35 4.2.1.107]	PF01575.14|MaoC_dehydratas	IPR002539|MaoC-like domain; IPR027090|Enoyl-CoA hydratase 2	GO:0008152|metabolic process ; GO:0016491|oxidoreductase activity	9	12	18	42	-0.435318	-1.23278	0.35	2.02	0	-1
Gh_A05G2167	A05	-	24824346	24825766	AT1G76150	enoyl-CoA hydratase 2	Q8VYI3	ECH2_ARATH Enoyl-CoA hydratase 2, peroxisomal OS=Arabidopsis thaliana GN=ECH2 PE=1 SV=1	B9H5E2	B9H5E2_POPTR Predicted protein OS=Populus trichocarpa GN=POPTRDRAFT_652170 PE=4 SV=1	dre:393105	hsd17b4; hydroxysteroid (17-beta) dehydrogenase 4 ; K12405 3-hydroxyacyl-CoA dehydrogenase / 3a,7a,12a-trihydroxy-5b-cholest-24-enoyl-CoA hydratase [EC:1.1.1.35 4.2.1.107]	PF13452.1|MaoC_dehydrat_N	IPR027090|Enoyl-CoA hydratase 2		8	8	14	33	0.0253178	-1.2018	0.02	2.46	0	-1
Gh_D01G0553	D01	+	7138161	7139498	AT4G27270	Quinone reductase family protein	C4XGC2	NQOR_DESMR NAD(P)H dehydrogenase (quinone) OS=Desulfovibrio magneticus (strain ATCC 700980 / DSM 13731 / RS-1) GN=DMR_02110 PE=3 SV=1	D2D309	D2D309_GOSHI Benzoquinone reductase OS=Gossypium hirsutum PE=2 SV=1	vvi:100232919	GSVIVT00027476001, QOR; quinone reductase-like ; K03809 Trp repressor binding protein	PF03358.10|FMN_red	IPR005025|NADPH-dependent FMN reductase; IPR008254|Flavodoxin/nitric oxide synthase	GO:0010181|FMN binding ; GO:0016491|oxidoreductase activity	46	64	26	105	-0.476715	-2.04773	0.45	1.6	0	-1
Gh_A11G1722	A11	+	26897938	26899685	AT4G36750	Quinone reductase family protein	P42058	ALTA7_ALTAL Minor allergen Alt a 7 OS=Alternaria alternata GN=ALTA7 PE=1 SV=1	B9SGI4	B9SGI4_RICCO Minor allergen Alt a, putative OS=Ricinus communis GN=RCOM_0553220 PE=4 SV=1	pop:POPTR_663306	hypothetical protein ; K03809 Trp repressor binding protein	PF03358.10|FMN_red	IPR005025|NADPH-dependent FMN reductase; IPR008254|Flavodoxin/nitric oxide synthase	GO:0010181|FMN binding ; GO:0016491|oxidoreductase activity	122	54	13	18	1.18673	-0.417414	2.44	0.28	1	0
Gh_D11G1880	D11	+	22033011	22034760	AT4G36750	Quinone reductase family protein	P42058	ALTA7_ALTAL Minor allergen Alt a 7 OS=Alternaria alternata GN=ALTA7 PE=1 SV=1	B9SGI4	B9SGI4_RICCO Minor allergen Alt a, putative OS=Ricinus communis GN=RCOM_0553220 PE=4 SV=1	pop:POPTR_663306	hypothetical protein ; K03809 Trp repressor binding protein	PF03358.10|FMN_red	IPR005025|NADPH-dependent FMN reductase; IPR008254|Flavodoxin/nitric oxide synthase	GO:0010181|FMN binding ; GO:0016491|oxidoreductase activity	50	20	13	16	1.33847	-0.329479	1.8	0.25	1	0
Gh_D05G2698	D05	-	28509851	28510786	AT5G07010	sulfotransferase 2A	Q8L5A7	SOT15_ARATH Cytosolic sulfotransferase 15 OS=Arabidopsis thaliana GN=SOT15 PE=1 SV=1	B9GX89	B9GX89_POPTR Predicted protein OS=Populus trichocarpa GN=POPTRDRAFT_647353 PE=2 SV=1	ath:AT2G03760	ST; ST (steroid sulfotransferase); sulfotransferase ; K01025	PF00685.22|Sulfotransfer_1	IPR000863|Sulfotransferase domain	GO:0008146|sulfotransferase activity	54	5	22	6	3.30226	1.80884	1.71	1.03	1	0
Gh_A03G0432	A03	-	9072059	9091600	AT5G58800	Quinone reductase family protein	O82383	U71D1_ARATH UDP-glycosyltransferase 71D1 OS=Arabidopsis thaliana GN=UGT71D1 PE=2 SV=1	B9SI05	B9SI05_RICCO Flavoprotein wrbA, putative OS=Ricinus communis GN=RCOM_0611780 PE=4 SV=1	pop:POPTR_663306	hypothetical protein ; K03809 Trp repressor binding protein	PF00201.13|UDPGT; PB000839|Pfam-B_839; PF03358.10|FMN_red	IPR002213|UDP-glucuronosyl/UDP-glucosyltransferase; IPR005025|NADPH-dependent FMN reductase; IPR008254|Flavodoxin/nitric oxide synthase	GO:0008152|metabolic process ; GO:0010181|FMN binding ; GO:0016758|transferase activity, transferring hexosyl groups ; GO:0016491|oxidoreductase activity	10	13	26	58	-0.392562	-1.19505	0.28	2.1	0	-1
Gh_A11G0930	A11	+	9958873	9960160	AT1G01020	Arv1-like protein	Q9HDX5	ARV1_SCHPO Protein arv1 OS=Schizosaccharomyces pombe (strain 972 / ATCC 24843) GN=arv1 PE=3 SV=3	D7U850	D7U850_VITVI Putative uncharacterized protein OS=Vitis vinifera GN=VIT_15s0048g02360 PE=4 SV=1			PF04161.8|Arv1	IPR007290|Arv1 protein		4	3	7	15	0.287665	-1.06087	0.18	1.58	0	-1
Gh_A07G0513	A07	-	6705558	6709212	AT1G13580	LAG1 longevity assurance homolog 3	Q6EUN0	ASCL1_ORYSJ ASC1-like protein 1 OS=Oryza sativa subsp. japonica GN=Os02g0581300 PE=2 SV=1	B9N080	B9N080_POPTR Predicted protein OS=Populus trichocarpa GN=POPTRDRAFT_836807 PE=4 SV=1	ago:AGOS_ABR009W	ABR009Wp; K04709 Acyl-CoA-dependent ceramide synthase [EC:2.3.1.24]	PF03798.11|TRAM_LAG1_CLN8	IPR006634|TRAM/LAG1/CLN8 homology domain	GO:0016021|integral to membrane	19	14	15	32	0.494412	-1.09523	0.53	1.46	0	-1
Gh_A08G2217	A08	+	103131115	103132458	AT2G46210	Fatty acid/sphingolipid desaturase	Q43469	SLD1_HELAN Delta(8)-fatty-acid desaturase OS=Helianthus annuus GN=sld1 PE=1 SV=1	B9RRR1	B9RRR1_RICCO Fatty acid desaturase, putative OS=Ricinus communis GN=RCOM_0797300 PE=4 SV=1	bta:515925	FADS3; fatty acid desaturase 3 (EC:1.14.19.-); K10225 fatty acid desaturase 3 (delta-6 desaturase) [EC:1.14.19.-]	PB012113|Pfam-B_12113; PF00173.23|Cyt-b5; PF00487.19|FA_desaturase; PB003476|Pfam-B_3476	IPR001199|Cytochrome b5-like heme/steroid binding domain; IPR005804|Fatty acid desaturase, type 1	GO:0020037|heme binding ; GO:0006629|lipid metabolic process	356	157	97	103	1.18061	-0.0811344	1.48	0.04	1	0
Gh_D08G2583	D08	+	65460731	65462074	AT2G46210	Fatty acid/sphingolipid desaturase	Q43469	SLD1_HELAN Delta(8)-fatty-acid desaturase OS=Helianthus annuus GN=sld1 PE=1 SV=1	B9RRR1	B9RRR1_RICCO Fatty acid desaturase, putative OS=Ricinus communis GN=RCOM_0797300 PE=4 SV=1	bta:515925	FADS3; fatty acid desaturase 3 (EC:1.14.19.-); K10225 fatty acid desaturase 3 (delta-6 desaturase) [EC:1.14.19.-]	PB012113|Pfam-B_12113; PF00173.23|Cyt-b5; PF00487.19|FA_desaturase; PB003476|Pfam-B_3476	IPR001199|Cytochrome b5-like heme/steroid binding domain; IPR005804|Fatty acid desaturase, type 1	GO:0020037|heme binding ; GO:0006629|lipid metabolic process	326	138	106	82	1.24176	0.37216	1.71	0.27	1	0
Gh_A07G1291	A07	+	30625403	30626746	AT2G46210	Fatty acid/sphingolipid desaturase	Q43469	SLD1_HELAN Delta(8)-fatty-acid desaturase OS=Helianthus annuus GN=sld1 PE=1 SV=1	B9GQE8	B9GQE8_POPTR Predicted protein OS=Populus trichocarpa GN=POPTRDRAFT_644538 PE=4 SV=1	bta:515925	FADS3; fatty acid desaturase 3 (EC:1.14.19.-); K10225 fatty acid desaturase 3 (delta-6 desaturase) [EC:1.14.19.-]	PB012113|Pfam-B_12113; PF00173.23|Cyt-b5; PF00487.19|FA_desaturase; PB003476|Pfam-B_3476	IPR001199|Cytochrome b5-like heme/steroid binding domain; IPR005804|Fatty acid desaturase, type 1	GO:0020037|heme binding ; GO:0006629|lipid metabolic process	192	95	76	68	1.0162	0.14686	1.94	0.16	1	0
Gh_D07G1405	D07	+	23118528	23119871	AT2G46210	Fatty acid/sphingolipid desaturase	Q43469	SLD1_HELAN Delta(8)-fatty-acid desaturase OS=Helianthus annuus GN=sld1 PE=1 SV=1	B9GQE8	B9GQE8_POPTR Predicted protein OS=Populus trichocarpa GN=POPTRDRAFT_644538 PE=4 SV=1	bta:515925	FADS3; fatty acid desaturase 3 (EC:1.14.19.-); K10225 fatty acid desaturase 3 (delta-6 desaturase) [EC:1.14.19.-]	PB012113|Pfam-B_12113; PF00173.23|Cyt-b5; PF00487.19|FA_desaturase; PB003476|Pfam-B_3476	IPR001199|Cytochrome b5-like heme/steroid binding domain; IPR005804|Fatty acid desaturase, type 1	GO:0020037|heme binding ; GO:0006629|lipid metabolic process	184	86	75	70	1.09565	0.0838567	1.76	0.08	1	0
Gh_D01G0004	D01	+	23088	23945	AT3G06470	GNS1/SUR4 membrane protein family	Q86JM5	Y2012_DICDI Putative elongation of fatty acids protein DDB_G0272012 OS=Dictyostelium discoideum GN=DDB_G0272012 PE=3 SV=1	M9ZA77	M9ZA77_GOSRA 3-ketoacyl-CoA synthase 12 OS=Gossypium raimondii GN=KCS12 PE=4 SV=1	dme:Dmel_CG11801	Elo68beta; Elongase 68beta ; K10249 elongation of very long chain fatty acids protein 4	PF01151.13|ELO	IPR002076|GNS1/SUR4 membrane protein	GO:0016021|integral to membrane	783	335	71	83	1.22348	-0.216324	1.93	0.08	1	0
Gh_A01G0005	A01	+	48194	49051	AT3G06470	GNS1/SUR4 membrane protein family	Q86JM5	Y2012_DICDI Putative elongation of fatty acids protein DDB_G0272012 OS=Dictyostelium discoideum GN=DDB_G0272012 PE=3 SV=1	M9Z6L8	M9Z6L8_GOSRA 3-ketoacyl-CoA synthase OS=Gossypium raimondii GN=KCS PE=4 SV=1	pic:PICST_34675	ELO2; Fatty acyl-CoA elongase/Polyunsaturated fatty acid specific elongation enzyme ; K10245 fatty acid elongase 2 [EC:2.3.1.-]	PF01151.13|ELO	IPR002076|GNS1/SUR4 membrane protein	GO:0016021|integral to membrane	467	186	33	38	1.33048	-0.234841	2.27	0.08	1	0
Gh_D01G0003	D01	+	13688	14545	AT3G06470	GNS1/SUR4 membrane protein family	Q86JM5	Y2012_DICDI Putative elongation of fatty acids protein DDB_G0272012 OS=Dictyostelium discoideum GN=DDB_G0272012 PE=3 SV=1	M9Z6L8	M9Z6L8_GOSRA 3-ketoacyl-CoA synthase OS=Gossypium raimondii GN=KCS PE=4 SV=1	pic:PICST_34675	ELO2; Fatty acyl-CoA elongase/Polyunsaturated fatty acid specific elongation enzyme ; K10245 fatty acid elongase 2 [EC:2.3.1.-]	PF01151.13|ELO	IPR002076|GNS1/SUR4 membrane protein	GO:0016021|integral to membrane	355	149	26	37	1.25696	-0.500102	1.49	0.12	1	0
Gh_A05G1408	A05	-	14550760	14554082	AT4G21540	sphingosine kinase 1	Q8L7L1	SPHK1_ARATH Sphingosine kinase 1 OS=Arabidopsis thaliana GN=SPHK1 PE=1 SV=1	B9HZ01	B9HZ01_POPTR Predicted protein OS=Populus trichocarpa GN=POPTRDRAFT_568293 PE=4 SV=1	vvi:100248229	hypothetical protein LOC100248229 ; K04718 sphingosine kinase [EC:2.7.1.91]	PF00781.19|DAGK_cat	IPR001206|Diacylglycerol kinase, catalytic domain	GO:0004143|diacylglycerol kinase activity ; GO:0007205|protein kinase C-activating G-protein coupled receptor signaling pathway	5	5	7	15	-0.0444518	-1.05115	0.03	1.4	0	-1
Gh_D10G0804	D10	+	9978130	9994062	AT4G36480	long-chain base1	Q94IB8	LCB1_ARATH Long chain base biosynthesis protein 1 OS=Arabidopsis thaliana GN=LCB1 PE=1 SV=1	M5XCL8	M5XCL8_PRUPE Uncharacterized protein OS=Prunus persica GN=PRUPE_ppa004977mg PE=4 SV=1	vvi:100254626	GSVIVT00003631001; hypothetical protein LOC100254626 ; K00654 serine palmitoyltransferase [EC:2.3.1.50]	PF00155.16|Aminotran_1_2	IPR004839|Aminotransferase, class I/classII	GO:0009058|biosynthetic process ; GO:0030170|pyridoxal phosphate binding	19	38	32	79	-0.971301	-1.31166	1.45	2.47	0	-1
Gh_A04G0953	A04	+	59106929	59114673	AT5G23450	long-chain base (LCB) kinase 1	Q9LRB0	LCBK1_ARATH Sphingoid long-chain bases kinase 1 OS=Arabidopsis thaliana GN=LCBK1 PE=1 SV=1	M5XVI1	M5XVI1_PRUPE Uncharacterized protein OS=Prunus persica GN=PRUPE_ppa001710mg PE=4 SV=1	gga:425523	CERK; ceramide kinase (EC:2.7.1.138); K04715 ceramide kinase [EC:2.7.1.138]	PF00781.19|DAGK_cat	IPR001206|Diacylglycerol kinase, catalytic domain	GO:0004143|diacylglycerol kinase activity ; GO:0007205|protein kinase C-activating G-protein coupled receptor signaling pathway	27	25	26	56	0.0944522	-1.11071	0.12	2.02	0	-1
Gh_D04G1477	D04	+	46611987	46619887	AT5G23450	long-chain base (LCB) kinase 1	Q9LRB0	LCBK1_ARATH Sphingoid long-chain bases kinase 1 OS=Arabidopsis thaliana GN=LCBK1 PE=1 SV=1	M5XVI1	M5XVI1_PRUPE Uncharacterized protein OS=Prunus persica GN=PRUPE_ppa001710mg PE=4 SV=1	mbr:MONBRDRAFT_33671	hypothetical protein ; K04718 sphingosine kinase [EC:2.7.1.91]	PF00781.19|DAGK_cat	IPR001206|Diacylglycerol kinase, catalytic domain	GO:0004143|diacylglycerol kinase activity ; GO:0007205|protein kinase C-activating G-protein coupled receptor signaling pathway	15	18	17	37	-0.27764	-1.09044	1.25	3.74	0	-1
Gh_D03G1137	D03	-	37572905	37576889	AT1G07380	Neutral/alkaline non-lysosomal ceramidase	Q0JL46	NCASE_ORYSJ Neutral ceramidase OS=Oryza sativa subsp. japonica GN=Os01g0624000 PE=1 SV=1	B9S377	B9S377_RICCO Ceramidase, putative OS=Ricinus communis GN=RCOM_0731110 PE=4 SV=1	tad:TRIADDRAFT_29967	hypothetical protein ; K12349 neutral ceramidase [EC:3.5.1.23]	PF04734.8|Ceramidase_alk	IPR006823|Neutral/alkaline nonlysosomal ceramidase		89	29	85	104	1.61175	-0.283182	2.12	0.72	1	0
Gh_A03G0402	A03	+	7839073	7843069	AT1G07380	Neutral/alkaline non-lysosomal ceramidase	Q304B9	NCASE_ARATH Neutral ceramidase OS=Arabidopsis thaliana GN=At2g38010 PE=2 SV=1	B9S377	B9S377_RICCO Ceramidase, putative OS=Ricinus communis GN=RCOM_0731110 PE=4 SV=1	tad:TRIADDRAFT_29967	hypothetical protein ; K12349 neutral ceramidase [EC:3.5.1.23]	PF04734.8|Ceramidase_alk	IPR006823|Neutral/alkaline nonlysosomal ceramidase		85	29	61	84	1.53281	-0.462473	1.65	0.73	1	0
Gh_A08G1572	A08	-	94021177	94022609	AT4G12110	sterol-4alpha-methyl oxidase 1-1	Q8L7W5	SMO11_ARATH Methylsterol monooxygenase 1-1 OS=Arabidopsis thaliana GN=SMO1-1 PE=1 SV=1	B9N3L5	B9N3L5_POPTR Predicted protein (Fragment) OS=Populus trichocarpa GN=POPTRDRAFT_267028 PE=4 SV=1	ath:AT1G07420	SMO2-2; SMO2-2 (sterol 4-alpha-methyl-oxidase 2); C-4 methylsterol oxidase ; K07750 methylsterol monooxygenase [EC:1.14.13.72]	PB015840|Pfam-B_15840; PF04116.8|FA_hydroxylase	IPR006694|Fatty acid hydroxylase	GO:0005506|iron ion binding ; GO:0006633|fatty acid biosynthetic process ; GO:0055114|oxidation-reduction process ; GO:0016491|oxidoreductase activity	20	8	11	20	1.34602	-0.840471	1.5	1.15	1	0
Gh_D08G2376	D08	-	63635636	63643517	AT3G07020	UDP-Glycosyltransferase superfamily protein	Q9M8Z7	U80A2_ARATH Sterol 3-beta-glucosyltransferase UGT80A2 OS=Arabidopsis thaliana GN=UGT80A2 PE=2 SV=1	B9RFT9	B9RFT9_RICCO Transferase, transferring glycosyl groups, putative OS=Ricinus communis GN=RCOM_1437250 PE=4 SV=1	osa:4335001	Os04g0131900; hypothetical protein ; K05841 sterol 3beta-glucosyltransferase [EC:2.4.1.173]	PF03033.15|Glyco_transf_28; PB004519|Pfam-B_4519; PB000971|Pfam-B_971	IPR002213|UDP-glucuronosyl/UDP-glucosyltransferase; IPR004276|Glycosyl transferase, family 28	GO:0030259|lipid glycosylation ; GO:0008152|metabolic process ; GO:0016758|transferase activity, transferring hexosyl groups ; GO:0005975|carbohydrate metabolic process	20	26	38	77	-0.351388	-1.03455	0.22	1.38	0	-1
Gh_A08G1982	A08	-	100912837	100920883	AT3G07020	UDP-Glycosyltransferase superfamily protein	Q9M8Z7	U80A2_ARATH Sterol 3-beta-glucosyltransferase UGT80A2 OS=Arabidopsis thaliana GN=UGT80A2 PE=2 SV=1	B9RFT9	B9RFT9_RICCO Transferase, transferring glycosyl groups, putative OS=Ricinus communis GN=RCOM_1437250 PE=4 SV=1	osa:4335001	Os04g0131900; hypothetical protein ; K05841 sterol 3beta-glucosyltransferase [EC:2.4.1.173]	PF03033.15|Glyco_transf_28; PB004519|Pfam-B_4519; PB000971|Pfam-B_971	IPR002213|UDP-glucuronosyl/UDP-glucosyltransferase; IPR004276|Glycosyl transferase, family 28	GO:0030259|lipid glycosylation ; GO:0008152|metabolic process ; GO:0016758|transferase activity, transferring hexosyl groups ; GO:0005975|carbohydrate metabolic process	10	9	30	66	0.0755076	-1.12855	0.03	1.53	0	-1
Gh_D02G0145	D02	+	1352777	1359668	AT2G43420	3-beta hydroxysteroid dehydrogenase/isomerase family protein	A9X4U2	HSDD3_ARATH 3beta-hydroxysteroid-dehydrogenase/decarboxylase isoform 3 OS=Arabidopsis thaliana GN=3BETAHSD/D3 PE=2 SV=2	D7U1V9	D7U1V9_VITVI Putative uncharacterized protein OS=Vitis vinifera GN=VIT_05s0102g01170 PE=3 SV=1	sbi:SORBI_01g032980	SORBIDRAFT_01g032980; hypothetical protein ; K07748 sterol-4alpha-carboxylate 3-dehydrogenase (decarboxylating) [EC:1.1.1.170]	PF01073.14|3Beta_HSD; PF02453.12|Reticulon	IPR002225|3-beta hydroxysteroid dehydrogenase/isomerase; IPR003388|Reticulon	GO:0006694|steroid biosynthetic process ; GO:0005783|endoplasmic reticulum ; GO:0016616|oxidoreductase activity, acting on the CH-OH group of donors, NAD or NADP as acceptor ; GO:0003854|3-beta-hydroxy-delta5-steroid dehydrogenase activity ; GO:0055114|oxidation-reduction process	5	6	26	58	-0.182322	-1.1474	0.09	2.5	0	-1
Gh_D01G0660	D01	+	9267613	9268374	AT2G43420	3-beta hydroxysteroid dehydrogenase/isomerase family protein	A9X4U2	HSDD3_ARATH 3beta-hydroxysteroid-dehydrogenase/decarboxylase isoform 3 OS=Arabidopsis thaliana GN=3BETAHSD/D3 PE=2 SV=2	D7U1V9	D7U1V9_VITVI Putative uncharacterized protein OS=Vitis vinifera GN=VIT_05s0102g01170 PE=3 SV=1	sbi:SORBI_01g032980	SORBIDRAFT_01g032980; hypothetical protein ; K07748 sterol-4alpha-carboxylate 3-dehydrogenase (decarboxylating) [EC:1.1.1.170]	PF01073.14|3Beta_HSD	IPR002225|3-beta hydroxysteroid dehydrogenase/isomerase	GO:0006694|steroid biosynthetic process ; GO:0016616|oxidoreductase activity, acting on the CH-OH group of donors, NAD or NADP as acceptor ; GO:0003854|3-beta-hydroxy-delta5-steroid dehydrogenase activity ; GO:0055114|oxidation-reduction process	3	10	5	12	-1.62746	-1.21771	1.34	1.33	-1	-1
Gh_A08G0143	A08	-	1342590	1348723	AT2G07050	cycloartenol synthase 1	Q8W3Z3	CAS2_BETPL Cycloartenol synthase 2 OS=Betula platyphylla GN=CASBPX2 PE=1 SV=1	M5XKH5	M5XKH5_PRUPE Uncharacterized protein OS=Prunus persica GN=PRUPE_ppa001844mg PE=4 SV=1	vvi:100243389	GSVIVT00016985001; hypothetical protein LOC100243389 ; K01853 cycloartenol synthase [EC:5.4.99.8]	PB012282|Pfam-B_12282; PB003550|Pfam-B_3550; PB003354|Pfam-B_3354; PB012414|Pfam-B_12414; PB004135|Pfam-B_4135; PB003997|Pfam-B_3997; PB003663|Pfam-B_3663; PB001685|Pfam-B_1685; PB004711|Pfam-B_4711; PB003808|Pfam-B_3808; PF00432.16|Prenyltrans; PB012411|Pfam-B_12411; PB001610|Pfam-B_1610; PF13249.1|Prenyltrans_2	IPR001330|Prenyltransferase/squalene oxidase; IPR002365|Terpene synthase, conserved site	GO:0016866|intramolecular transferase activity ; GO:0003824|catalytic activity	66	59	36	82	0.175529	-1.18625	0.24	1.6	0	-1
Gh_D11G0059	D11	+	542945	548510	AT1G73920	alpha/beta-Hydrolases superfamily protein	Q3U4B4	LIPN_MOUSE Lipase member N OS=Mus musculus GN=Lipn PE=2 SV=1	B9I2Q8	B9I2Q8_POPTR Predicted protein OS=Populus trichocarpa GN=POPTRDRAFT_823306 PE=4 SV=1	dme:Dmel_CG17116	Lip2; Lipase 2 (EC:3.1.1.3); K01046 triacylglycerol lipase [EC:3.1.1.3]	PB000494|Pfam-B_494; PF04083.11|Abhydro_lipase	IPR006693|Partial AB-hydrolase lipase domain	GO:0006629|lipid metabolic process	47	23	74	97	1.02844	-0.397038	1.34	1.09	1	0
Gh_A11G0699	A11	-	6792069	6804215	AT2G44970	alpha/beta-Hydrolases superfamily protein			B9RD37	B9RD37_RICCO Putative uncharacterized protein OS=Ricinus communis GN=RCOM_1609300 PE=4 SV=1			PF02450.10|LCAT	IPR003386|Lecithin:cholesterol/phospholipid:diacylglycerol acyltransferase	GO:0008374|O-acyltransferase activity ; GO:0006629|lipid metabolic process	6	8	5	19	-0.393904	-1.86075	0.49	2.25	0	-1
Gh_D11G0815	D11	-	6976338	6980193	AT2G44970	alpha/beta-Hydrolases superfamily protein			B9RD37	B9RD37_RICCO Putative uncharacterized protein OS=Ricinus communis GN=RCOM_1609300 PE=4 SV=1			PF02450.10|LCAT	IPR003386|Lecithin:cholesterol/phospholipid:diacylglycerol acyltransferase	GO:0008374|O-acyltransferase activity ; GO:0006629|lipid metabolic process	5	7	4	14	-0.298493	-1.71008	0.5	2.62	0	-1
Gh_A09G0598	A09	-	48125264	48129022	AT5G18640	alpha/beta-Hydrolases superfamily protein	P19515	LIP_RHIMI Lipase OS=Rhizomucor miehei PE=1 SV=2	B6V3M3	B6V3M3_9ROSI Lipase OS=Jatropha curcas PE=2 SV=1	tet:TTHERM_00194590	Lipase family protein (EC:3.1.1.73); K09252 feruloyl esterase [EC:3.1.1.73]	PF01764.20|Lipase_3; PB018919|Pfam-B_18919	IPR002921|Lipase, class 3	GO:0004806|triglyceride lipase activity ; GO:0006629|lipid metabolic process	4	3	17	35	0.628609	-1.03746	0.38	2.45	0	-1
Gh_A02G1725	scaffold192_A02	-	4217	10909	AT1G05790	lipase class 3 family protein	Q91WC9	DGLB_MOUSE Sn1-specific diacylglycerol lipase beta OS=Mus musculus GN=Daglb PE=1 SV=2	M5XYH6	M5XYH6_PRUPE Uncharacterized protein OS=Prunus persica GN=PRUPE_ppa001794mg PE=4 SV=1	dme:Dmel_CG33174	CG33174 gene product from transcript CG33174-RF (EC:3.1.1.3); K01046 triacylglycerol lipase [EC:3.1.1.3]	PF01764.20|Lipase_3	IPR002921|Lipase, class 3	GO:0004806|triglyceride lipase activity ; GO:0006629|lipid metabolic process	5	6	9	21	-0.241162	-1.29916	0.12	1.4	0	-1
Gh_A07G0830	A07	-	14255853	14264092	AT3G07400	lipase class 3 family protein			M5W293	M5W293_PRUPE Uncharacterized protein OS=Prunus persica GN=PRUPE_ppa000736mg PE=4 SV=1			PB002848|Pfam-B_2848; PF01764.20|Lipase_3	IPR002921|Lipase, class 3	GO:0004806|triglyceride lipase activity ; GO:0006629|lipid metabolic process	15	13	17	35	0.300585	-1.02032	0.27	1.52	0	-1
Gh_D02G0314	D02	-	4261363	4273310	AT4G13550	triglyceride lipases;triglyceride lipases	Q0CBM7	FAEA_ASPTN Probable feruloyl esterase A OS=Aspergillus terreus (strain NIH 2624 / FGSC A1156) GN=faeA PE=3 SV=1	K4CWD1	K4CWD1_SOLLC Uncharacterized protein OS=Solanum lycopersicum GN=Solyc09g091050.2 PE=4 SV=1	tet:TTHERM_00194590	Lipase family protein (EC:3.1.1.73); K09252 feruloyl esterase [EC:3.1.1.73]	PB007588|Pfam-B_7588; PF01764.20|Lipase_3; PF00168.25|C2	IPR000008|C2 calcium-dependent membrane targeting; IPR002921|Lipase, class 3; IPR018029|C2 membrane targeting protein	GO:0005515|protein binding ; GO:0004806|triglyceride lipase activity ; GO:0006629|lipid metabolic process	3	8	13	28	-1.45861	-1.10691	1.23	2.25	0	-1
Gh_A01G0215	A01	-	2096672	2102177	AT4G16070	Mono-/di-acylglycerol lipase, N-terminal;Lipase, class 3	Q9Y4D2	DGLA_HUMAN Sn1-specific diacylglycerol lipase alpha OS=Homo sapiens GN=DAGLA PE=1 SV=3	M5XVK6	M5XVK6_PRUPE Uncharacterized protein OS=Prunus persica GN=PRUPE_ppa002828mg PE=4 SV=1	dme:Dmel_CG33174	CG33174 gene product from transcript CG33174-RF (EC:3.1.1.3); K01046 triacylglycerol lipase [EC:3.1.1.3]	PF01764.20|Lipase_3; PF03893.11|Lipase3_N	IPR002921|Lipase, class 3; IPR005592|Mono-/di-acylglycerol lipase, N-terminal	GO:0016042|lipid catabolic process ; GO:0004091|carboxylesterase activity ; GO:0004806|triglyceride lipase activity ; GO:0006629|lipid metabolic process	7	18	14	37	-1.44121	-1.43667	1.12	1.78	0	-1
Gh_A09G0350	A09	+	15022043	15026171	AT5G14180	Myzus persicae-induced lipase 1	Q67ZU1	LIP2_ARATH Triacylglycerol lipase 2 OS=Arabidopsis thaliana GN=LIP2 PE=2 SV=1	Q1XBG1	Q1XBG1_RICCO Lipase OS=Ricinus communis GN=RCOM_1677770 PE=2 SV=1	tad:TRIADDRAFT_54597	hypothetical protein ; K01052 lysosomal acid lipase/cholesteryl ester hydrolase [EC:3.1.1.13]	PF04083.11|Abhydro_lipase	IPR006693|Partial AB-hydrolase lipase domain	GO:0006629|lipid metabolic process	3	2	51	22	0.133284	1.19423	0.02	1.42	0	1
Gh_D09G0354	D09	+	12003097	12010215	AT5G14180	Myzus persicae-induced lipase 1	Q67ZU1	LIP2_ARATH Triacylglycerol lipase 2 OS=Arabidopsis thaliana GN=LIP2 PE=2 SV=1	Q1XBG1	Q1XBG1_RICCO Lipase OS=Ricinus communis GN=RCOM_1677770 PE=2 SV=1	tad:TRIADDRAFT_54597	hypothetical protein ; K01052 lysosomal acid lipase/cholesteryl ester hydrolase [EC:3.1.1.13]	PF04083.11|Abhydro_lipase	IPR006693|Partial AB-hydrolase lipase domain	GO:0006629|lipid metabolic process	2	2	30	15	2.22045e-16	1.04454	0	1.75	0	1
Gh_A12G0493	A12	-	11141796	11149130	AT5G16120	alpha/beta-Hydrolases superfamily protein	Q99685	MGLL_HUMAN Monoglyceride lipase OS=Homo sapiens GN=MGLL PE=1 SV=2	B9N233	B9N233_POPTR Predicted protein OS=Populus trichocarpa GN=POPTRDRAFT_827820 PE=4 SV=1	nve:NEMVE_v1g195674	hypothetical protein ; K01054 acylglycerol lipase [EC:3.1.1.23]	PF12697.2|Abhydrolase_6	IPR000073|Alpha/beta hydrolase fold-1		15	18	27	54	-0.282719	-1.00688	0.25	1.72	0	-1
Gh_D02G1023	D02	-	25492635	25521204	AT1G31480	shoot gravitropism 2 (SGR2)	O46606	DDHD1_BOVIN Phospholipase DDHD1 OS=Bos taurus GN=DDHD1 PE=1 SV=1	B9SHQ6	B9SHQ6_RICCO Putative uncharacterized protein OS=Ricinus communis GN=RCOM_0742540 PE=4 SV=1	bta:338047	DDHD1; DDHD domain containing 1 ; K01066 esterase / lipase [EC:3.1.1.-]	PB000901|Pfam-B_901; PB001577|Pfam-B_1577; PF02862.12|DDHD; PB002494|Pfam-B_2494	IPR004177|DDHD	GO:0046872|metal ion binding	13	26	30	56	-1.00371	-0.908017	1.57	2.28	-1	0
Gh_A03G1801	A03	+	99119100	99120056	AT4G38690	PLC-like phosphodiesterases superfamily protein	P34024	PLC_LISMO 1-phosphatidylinositol phosphodiesterase OS=Listeria monocytogenes serovar 1/2a (strain ATCC BAA-679 / EGD-e) GN=plcA PE=1 SV=1	F6I115	F6I115_VITVI Putative uncharacterized protein OS=Vitis vinifera GN=VIT_03s0038g02090 PE=4 SV=1	dre:100006223	DKEY-266F7.9; hypothetical LOC100006223 ; K01771 1-phosphatidylinositol phosphodiesterase [EC:4.6.1.13]	PF00388.14|PI-PLC-X	IPR000909|Phospholipase C, phosphatidylinositol-specific , X domain		23	10	9	15	1.12694	-0.653117	1.54	0.78	1	0
Gh_D03G0546	D03	-	10422279	10425127	AT1G55180	phospholipase D alpha 4	Q9C888	PLDE1_ARATH Phospholipase D epsilon OS=Arabidopsis thaliana GN=PLDEPSILON PE=3 SV=1	B9MWR1	B9MWR1_POPTR Phospholipase D OS=Populus trichocarpa GN=POPTRDRAFT_781949 PE=3 SV=1	ath:AT1G55180	PLDEPSILON (PHOSPHOLIPASE D ALPHA 4); phospholipase D ; K01115 phospholipase D [EC:3.1.4.4]	PF12357.3|PLD_C; PB002232|Pfam-B_2232; PB003054|Pfam-B_3054; PB007094|Pfam-B_7094; PF00614.17|PLDc; PB010767|Pfam-B_10767; PB015586|Pfam-B_15586; PB013644|Pfam-B_13644	IPR001736|Phospholipase D/Transphosphatidylase; IPR015679|Phospholipase D family; IPR024632|Phospholipase D, C-terminal	GO:0008152|metabolic process ; GO:0003824|catalytic activity	2	11	10	15	-2.22849	-0.637058	1.35	0.92	-1	0
Gh_A10G0662	A10	-	11048194	11066260	AT3G15730	phospholipase D alpha 1	Q41142	PLDA1_RICCO Phospholipase D alpha 1 OS=Ricinus communis GN=PLD1 PE=1 SV=1	D4P4T8	D4P4T8_GOSHI Phospholipase D OS=Gossypium hirsutum GN=PLDalpha PE=2 SV=1	vvi:100232987	GSVIVT00000347001, PLD; phospholipase D alpha ; K01115 phospholipase D [EC:3.1.4.4]	PF12357.3|PLD_C; PB003054|Pfam-B_3054; PB007094|Pfam-B_7094; PF00614.17|PLDc; PB010767|Pfam-B_10767; PB015586|Pfam-B_15586; PF00168.25|C2	IPR000008|C2 calcium-dependent membrane targeting; IPR001736|Phospholipase D/Transphosphatidylase; IPR015679|Phospholipase D family; IPR024632|Phospholipase D, C-terminal	GO:0008152|metabolic process ; GO:0005515|protein binding ; GO:0003824|catalytic activity	610	304	397	524	1.00336	-0.399331	1.81	0.82	1	0
Gh_A01G0213	A01	+	2083336	2091108	AT3G16785	phospholipase D P1	Q9LRZ5	PLDP1_ARATH Phospholipase D p1 OS=Arabidopsis thaliana GN=PLDP1 PE=2 SV=1	B9RTA5	B9RTA5_RICCO Phospholipase d zeta, putative OS=Ricinus communis GN=RCOM_0682600 PE=4 SV=1	vvi:100261987	similar to PLDP1 (PHOSPHOLIPASE D ZETA1); phospholipase D ; K01115 phospholipase D [EC:3.1.4.4]	PB016714|Pfam-B_16714; PB003216|Pfam-B_3216; PB004946|Pfam-B_4946; PF00614.17|PLDc; PB008728|Pfam-B_8728; PF13091.1|PLDc_2; PB004552|Pfam-B_4552	IPR001736|Phospholipase D/Transphosphatidylase; IPR001849|Pleckstrin homology domain; IPR015679|Phospholipase D family; IPR025202|Phospholipase D-like domain	GO:0008152|metabolic process ; GO:0005515|protein binding ; GO:0003824|catalytic activity ; GO:0005543|phospholipid binding	6	7	10	28	-0.325376	-1.4031	0.26	2.13	0	-1
Gh_Sca005308G01	scaffold5308	+	923	8640	AT3G16785	phospholipase D P1	Q9LRZ5	PLDP1_ARATH Phospholipase D p1 OS=Arabidopsis thaliana GN=PLDP1 PE=2 SV=1	B9RTA5	B9RTA5_RICCO Phospholipase d zeta, putative OS=Ricinus communis GN=RCOM_0682600 PE=4 SV=1	vvi:100261987	similar to PLDP1 (PHOSPHOLIPASE D ZETA1); phospholipase D ; K01115 phospholipase D [EC:3.1.4.4]	PB016714|Pfam-B_16714; PB003216|Pfam-B_3216; PB004946|Pfam-B_4946; PF00614.17|PLDc; PB008728|Pfam-B_8728; PF13091.1|PLDc_2; PB004552|Pfam-B_4552	IPR001736|Phospholipase D/Transphosphatidylase; IPR001849|Pleckstrin homology domain; IPR015679|Phospholipase D family; IPR025202|Phospholipase D-like domain	GO:0008152|metabolic process ; GO:0005515|protein binding ; GO:0003824|catalytic activity ; GO:0005543|phospholipid binding	5	7	11	28	-0.500775	-1.41908	0.39	2.18	0	-1
Gh_D12G0556	D12	-	10278949	10284459	AT4G35790	phospholipase D delta	Q9C5Y0	PLDD1_ARATH Phospholipase D delta OS=Arabidopsis thaliana GN=PLDDELTA PE=1 SV=2	Q8H6B9	Q8H6B9_GOSHI Phospholipase D OS=Gossypium hirsutum GN=pldd PE=2 SV=1	ath:AT2G42010	PLDBETA1 (PHOSPHOLIPASE D BETA 1); phospholipase D ; K01115 phospholipase D [EC:3.1.4.4]	PF12357.3|PLD_C; PB007094|Pfam-B_7094; PF00614.17|PLDc; PB010767|Pfam-B_10767; PB015586|Pfam-B_15586; PF00168.25|C2	IPR000008|C2 calcium-dependent membrane targeting; IPR001736|Phospholipase D/Transphosphatidylase; IPR015679|Phospholipase D family; IPR018029|C2 membrane targeting protein; IPR024632|Phospholipase D, C-terminal	GO:0008152|metabolic process ; GO:0005515|protein binding ; GO:0003824|catalytic activity	54	36	85	209	0.596395	-1.29234	0.25	1.34	0	-1
Gh_A12G0540	A12	-	13280804	13286284	AT4G35790	phospholipase D delta	Q9C5Y0	PLDD1_ARATH Phospholipase D delta OS=Arabidopsis thaliana GN=PLDDELTA PE=1 SV=2	Q8H6B9	Q8H6B9_GOSHI Phospholipase D OS=Gossypium hirsutum GN=pldd PE=2 SV=1	ath:AT2G42010	PLDBETA1 (PHOSPHOLIPASE D BETA 1); phospholipase D ; K01115 phospholipase D [EC:3.1.4.4]	PF12357.3|PLD_C; PB007094|Pfam-B_7094; PF00614.17|PLDc; PB010767|Pfam-B_10767; PB015586|Pfam-B_15586; PF00168.25|C2	IPR000008|C2 calcium-dependent membrane targeting; IPR001736|Phospholipase D/Transphosphatidylase; IPR015679|Phospholipase D family; IPR018029|C2 membrane targeting protein; IPR024632|Phospholipase D, C-terminal	GO:0008152|metabolic process ; GO:0005515|protein binding ; GO:0003824|catalytic activity	51	30	84	194	0.777502	-1.19864	0.43	1.6	0	-1
Gh_D12G0220	D12	-	2909185	2910096	AT1G47480	alpha/beta-Hydrolases superfamily protein	Q9SX78	CXE2_ARATH Probable carboxylesterase 2 OS=Arabidopsis thaliana GN=CXE2 PE=2 SV=1	B9SF01	B9SF01_RICCO A/G-specific adenine glycosylase muty, putative OS=Ricinus communis GN=RCOM_1211520 PE=4 SV=1	afm:AFUA_5G03770	lipase (EC:3.1.1.3); K01046 triacylglycerol lipase [EC:3.1.1.3]	PF07859.8|Abhydrolase_3	IPR013094|Alpha/beta hydrolase fold-3	GO:0016787|hydrolase activity ; GO:0008152|metabolic process	1	2	17	42	-0.916288	-1.25506	0.13	1.77	0	-1
Gh_D10G0773	D10	-	9200953	9203152	AT3G02040	senescence-related gene 3	Q02979	GDE1_YEAST Glycerophosphodiester phosphodiesterase GDE1 OS=Saccharomyces cerevisiae (strain ATCC 204508 / S288c) GN=GDE1 PE=1 SV=1	B9N0X1	B9N0X1_POPTR Predicted protein OS=Populus trichocarpa GN=POPTRDRAFT_783367 PE=4 SV=1	sce:YPL110C	GDE1; Gde1p ; K06867	PF03009.12|GDPD	IPR004129|Glycerophosphoryl diester phosphodiesterase	GO:0006071|glycerol metabolic process ; GO:0008889|glycerophosphodiester phosphodiesterase activity	11	13	30	61	-0.210565	-1.02802	0.2	2.39	0	-1
Gh_A10G0626	A10	+	10016443	10018618	AT3G02040	senescence-related gene 3	Q02979	GDE1_YEAST Glycerophosphodiester phosphodiesterase GDE1 OS=Saccharomyces cerevisiae (strain ATCC 204508 / S288c) GN=GDE1 PE=1 SV=1	B9N0X1	B9N0X1_POPTR Predicted protein OS=Populus trichocarpa GN=POPTRDRAFT_783367 PE=4 SV=1	sce:YPL110C	GDE1; Gde1p ; K06867	PF03009.12|GDPD	IPR004129|Glycerophosphoryl diester phosphodiesterase	GO:0006071|glycerol metabolic process ; GO:0008889|glycerophosphodiester phosphodiesterase activity	13	14	22	48	-0.188794	-1.09673	0.3	2.8	0	-1
Gh_D02G1768	D02	+	60214714	60217076	AT3G02040	senescence-related gene 3	Q02979	GDE1_YEAST Glycerophosphodiester phosphodiesterase GDE1 OS=Saccharomyces cerevisiae (strain ATCC 204508 / S288c) GN=GDE1 PE=1 SV=1	A5AMY0	A5AMY0_VITVI Putative uncharacterized protein OS=Vitis vinifera GN=VIT_14s0068g01500 PE=4 SV=1	sce:YPL110C	GDE1; Gde1p ; K06867	PF03009.12|GDPD	IPR004129|Glycerophosphoryl diester phosphodiesterase	GO:0006071|glycerol metabolic process ; GO:0008889|glycerophosphodiester phosphodiesterase activity	1	3	8	17	-1.09861	-1.09003	0.53	1.89	0	-1
Gh_D01G0186	D01	-	1525799	1531519	AT1G06290	acyl-CoA oxidase 3	P0CZ23	ACOX3_ARATH Acyl-coenzyme A oxidase 3, peroxisomal OS=Arabidopsis thaliana GN=ACX3 PE=1 SV=1	G8XNW7	G8XNW7_MALDO Acyl-coenzyme A oxidase OS=Malus domestica PE=2 SV=1	pop:POPTR_582787	hypothetical protein ; K00232 acyl-CoA oxidase [EC:1.3.3.6]	PF00441.19|Acyl-CoA_dh_1; PF01756.14|ACOX; PF02770.14|Acyl-CoA_dh_M; PB001025|Pfam-B_1025	IPR002655|Acyl-CoA oxidase, C-terminal; IPR006091|Acyl-CoA oxidase/dehydrogenase, central domain; IPR009075|Acyl-CoA dehydrogenase/oxidase C-terminal; IPR012258|Acyl-CoA oxidase	GO:0016627|oxidoreductase activity, acting on the CH-CH group of donors ; GO:0006635|fatty acid beta-oxidation ; GO:0003997|acyl-CoA oxidase activity ; GO:0006631|fatty acid metabolic process ; GO:0050660|flavin adenine dinucleotide binding ; GO:0005777|peroxisome ; GO:0003995|acyl-CoA dehydrogenase activity ; GO:0055114|oxidation-reduction process	47	20	179	196	1.21909	-0.129246	1.84	0.82	1	0
Gh_A12G1288	A12	-	68276181	68283563	AT1G06290	acyl-CoA oxidase 3	P0CZ23	ACOX3_ARATH Acyl-coenzyme A oxidase 3, peroxisomal OS=Arabidopsis thaliana GN=ACX3 PE=1 SV=1	B9N619	B9N619_POPTR Acyl-coenzyme A oxidase OS=Populus trichocarpa GN=POPTRDRAFT_582787 PE=2 SV=1	pop:POPTR_582787	hypothetical protein ; K00232 acyl-CoA oxidase [EC:1.3.3.6]	PF00441.19|Acyl-CoA_dh_1; PF01756.14|ACOX; PF02770.14|Acyl-CoA_dh_M; PB001025|Pfam-B_1025	IPR002655|Acyl-CoA oxidase, C-terminal; IPR006091|Acyl-CoA oxidase/dehydrogenase, central domain; IPR009075|Acyl-CoA dehydrogenase/oxidase C-terminal; IPR012258|Acyl-CoA oxidase	GO:0016627|oxidoreductase activity, acting on the CH-CH group of donors ; GO:0006635|fatty acid beta-oxidation ; GO:0003997|acyl-CoA oxidase activity ; GO:0006631|fatty acid metabolic process ; GO:0050660|flavin adenine dinucleotide binding ; GO:0005777|peroxisome ; GO:0003995|acyl-CoA dehydrogenase activity ; GO:0055114|oxidation-reduction process	58	26	73	89	1.1758	-0.284325	1.45	0.62	1	0
Gh_D12G1410	D12	-	43363720	43369229	AT1G06290	acyl-CoA oxidase 3	P0CZ23	ACOX3_ARATH Acyl-coenzyme A oxidase 3, peroxisomal OS=Arabidopsis thaliana GN=ACX3 PE=1 SV=1	B9N619	B9N619_POPTR Acyl-coenzyme A oxidase OS=Populus trichocarpa GN=POPTRDRAFT_582787 PE=2 SV=1	pop:POPTR_582787	hypothetical protein ; K00232 acyl-CoA oxidase [EC:1.3.3.6]	PF00441.19|Acyl-CoA_dh_1; PF01756.14|ACOX; PF02770.14|Acyl-CoA_dh_M; PB001025|Pfam-B_1025	IPR002655|Acyl-CoA oxidase, C-terminal; IPR006091|Acyl-CoA oxidase/dehydrogenase, central domain; IPR009075|Acyl-CoA dehydrogenase/oxidase C-terminal; IPR012258|Acyl-CoA oxidase	GO:0016627|oxidoreductase activity, acting on the CH-CH group of donors ; GO:0006635|fatty acid beta-oxidation ; GO:0003997|acyl-CoA oxidase activity ; GO:0006631|fatty acid metabolic process ; GO:0050660|flavin adenine dinucleotide binding ; GO:0005777|peroxisome ; GO:0003995|acyl-CoA dehydrogenase activity ; GO:0055114|oxidation-reduction process	59	14	62	65	2.08922	-0.0624422	2.05	0.12	1	0
Gh_A01G0142	A01	-	1312324	1323339	AT1G06290	acyl-CoA oxidase 3	P0CZ23	ACOX3_ARATH Acyl-coenzyme A oxidase 3, peroxisomal OS=Arabidopsis thaliana GN=ACX3 PE=1 SV=1	G8XNW7	G8XNW7_MALDO Acyl-coenzyme A oxidase OS=Malus domestica PE=2 SV=1	pop:POPTR_582787	hypothetical protein ; K00232 acyl-CoA oxidase [EC:1.3.3.6]	PF00441.19|Acyl-CoA_dh_1; PF01756.14|ACOX; PF02770.14|Acyl-CoA_dh_M; PB001025|Pfam-B_1025	IPR002655|Acyl-CoA oxidase, C-terminal; IPR006091|Acyl-CoA oxidase/dehydrogenase, central domain; IPR009075|Acyl-CoA dehydrogenase/oxidase C-terminal; IPR012258|Acyl-CoA oxidase	GO:0016627|oxidoreductase activity, acting on the CH-CH group of donors ; GO:0006635|fatty acid beta-oxidation ; GO:0003997|acyl-CoA oxidase activity ; GO:0006631|fatty acid metabolic process ; GO:0050660|flavin adenine dinucleotide binding ; GO:0005777|peroxisome ; GO:0003995|acyl-CoA dehydrogenase activity ; GO:0055114|oxidation-reduction process	5	29	10	41	-2.45022	-2.1032	1.91	2.31	-1	-1
Gh_A09G2434	scaffold2302_A09	-	99825	103306	AT3G51840	acyl-CoA oxidase 4	Q96329	ACOX4_ARATH Acyl-coenzyme A oxidase 4, peroxisomal OS=Arabidopsis thaliana GN=ACX4 PE=1 SV=1	B9T1J4	B9T1J4_RICCO Acyl-CoA dehydrogenase, putative OS=Ricinus communis GN=RCOM_0186930 PE=3 SV=1	vvi:100257352	hypothetical protein LOC100257352 ; K00252 glutaryl-CoA dehydrogenase [EC:1.3.99.7]	PF00441.19|Acyl-CoA_dh_1; PF02771.11|Acyl-CoA_dh_N; PF02770.14|Acyl-CoA_dh_M	IPR006089|Acyl-CoA dehydrogenase, conserved site; IPR006091|Acyl-CoA oxidase/dehydrogenase, central domain; IPR006092|Acyl-CoA dehydrogenase, N-terminal; IPR009075|Acyl-CoA dehydrogenase/oxidase C-terminal	GO:0016627|oxidoreductase activity, acting on the CH-CH group of donors ; GO:0003995|acyl-CoA dehydrogenase activity ; GO:0055114|oxidation-reduction process	3	14	9	40	-1.981	-2.14496	1.02	2.05	0	-1
Gh_A07G1965	A07	-	75619687	75623697	AT4G16760	acyl-CoA oxidase 1	O65202	ACOX1_ARATH Peroxisomal acyl-coenzyme A oxidase 1 OS=Arabidopsis thaliana GN=ACX1 PE=1 SV=1	E9L0E1	E9L0E1_GOSHI Acyl-coenzyme A oxidase OS=Gossypium hirsutum PE=2 SV=1	pop:POPTR_836303	hypothetical protein ; K00232 acyl-CoA oxidase [EC:1.3.3.6]	PF00628.24|PHD; PF01756.14|ACOX	IPR001965|Zinc finger, PHD-type; IPR002655|Acyl-CoA oxidase, C-terminal; IPR012258|Acyl-CoA oxidase; IPR019786|Zinc finger, PHD-type, conserved site; IPR019787|Zinc finger, PHD-finger	GO:0006635|fatty acid beta-oxidation ; GO:0005515|protein binding ; GO:0003997|acyl-CoA oxidase activity ; GO:0006631|fatty acid metabolic process ; GO:0050660|flavin adenine dinucleotide binding ; GO:0008270|zinc ion binding ; GO:0005777|peroxisome ; GO:0055114|oxidation-reduction process	18	23	24	64	-0.402837	-1.44599	0.65	2.74	0	-1
Gh_A07G1442	A07	+	40009589	40011315	AT4G16760	acyl-CoA oxidase 1	O65202	ACOX1_ARATH Peroxisomal acyl-coenzyme A oxidase 1 OS=Arabidopsis thaliana GN=ACX1 PE=1 SV=1	E9L0E1	E9L0E1_GOSHI Acyl-coenzyme A oxidase OS=Gossypium hirsutum PE=2 SV=1	pop:POPTR_836303	hypothetical protein ; K00232 acyl-CoA oxidase [EC:1.3.3.6]	PF01756.14|ACOX	IPR002655|Acyl-CoA oxidase, C-terminal; IPR012258|Acyl-CoA oxidase	GO:0006635|fatty acid beta-oxidation ; GO:0003997|acyl-CoA oxidase activity ; GO:0006631|fatty acid metabolic process ; GO:0050660|flavin adenine dinucleotide binding ; GO:0005777|peroxisome ; GO:0055114|oxidation-reduction process	15	14	17	47	0.0529224	-1.4781	0.12	3.74	0	-1
Gh_A11G1444	A11	+	19757410	19764959	AT1G06550	ATP-dependent caseinolytic (Clp) protease/crotonase family protein	Q9SHJ8	HIBC8_ARATH 3-hydroxyisobutyryl-CoA hydrolase-like protein 5 OS=Arabidopsis thaliana GN=At1g06550 PE=2 SV=2	A9PBA7	A9PBA7_POPTR Predicted protein OS=Populus trichocarpa GN=POPTRDRAFT_551227 PE=2 SV=1	ppp:PHYPADRAFT_199427	hypothetical protein ; K01692 enoyl-CoA hydratase [EC:4.2.1.17]	PF13766.1|ECH_C; PB002828|Pfam-B_2828			263	126	41	59	1.06163	-0.531464	2.28	0.49	1	0
Gh_D11G1599	D11	+	16738908	16744047	AT1G06550	ATP-dependent caseinolytic (Clp) protease/crotonase family protein	Q9SHJ8	HIBC8_ARATH 3-hydroxyisobutyryl-CoA hydrolase-like protein 5 OS=Arabidopsis thaliana GN=At1g06550 PE=2 SV=2	A9PBA7	A9PBA7_POPTR Predicted protein OS=Populus trichocarpa GN=POPTRDRAFT_551227 PE=2 SV=1	ppp:PHYPADRAFT_199427	hypothetical protein ; K01692 enoyl-CoA hydratase [EC:4.2.1.17]	PF13766.1|ECH_C; PB002828|Pfam-B_2828			239	89	45	63	1.42255	-0.480346	3.86	1.23	1	0
Gh_D11G0819	D11	-	7011068	7014103	AT3G60510	ATP-dependent caseinolytic (Clp) protease/crotonase family protein	Q5XF59	HIBC4_ARATH 3-hydroxyisobutyryl-CoA hydrolase-like protein 1, mitochondrial OS=Arabidopsis thaliana GN=At3g60510 PE=2 SV=1	B9RD44	B9RD44_RICCO Catalytic, putative OS=Ricinus communis GN=RCOM_1609370 PE=4 SV=1	ppp:PHYPADRAFT_199427	hypothetical protein ; K01692 enoyl-CoA hydratase [EC:4.2.1.17]	PB013792|Pfam-B_13792; PF00378.15|ECH; PF13766.1|ECH_C; PB002828|Pfam-B_2828	IPR001753|Crotonase superfamily	GO:0008152|metabolic process ; GO:0003824|catalytic activity	7	9	21	44	-0.478035	-1.03047	0.86	3.27	0	-1
Gh_A05G0487	A05	-	5291161	5294367	AT4G31810	ATP-dependent caseinolytic (Clp) protease/crotonase family protein	Q8RXN4	HIBC5_ARATH 3-hydroxyisobutyryl-CoA hydrolase-like protein 2, mitochondrial OS=Arabidopsis thaliana GN=At4g31810 PE=2 SV=1	D7SV41	D7SV41_VITVI Putative uncharacterized protein OS=Vitis vinifera GN=VIT_04s0008g06610 PE=4 SV=1	ppp:PHYPADRAFT_199427	hypothetical protein ; K01692 enoyl-CoA hydratase [EC:4.2.1.17]	PF00378.15|ECH; PF13766.1|ECH_C; PB002828|Pfam-B_2828	IPR001753|Crotonase superfamily	GO:0008152|metabolic process ; GO:0003824|catalytic activity	19	17	20	43	0.157807	-1.14513	0.31	2.73	0	-1
Gh_D05G0605	D05	-	4903751	4906960	AT4G31810	ATP-dependent caseinolytic (Clp) protease/crotonase family protein	Q8RXN4	HIBC5_ARATH 3-hydroxyisobutyryl-CoA hydrolase-like protein 2, mitochondrial OS=Arabidopsis thaliana GN=At4g31810 PE=2 SV=1	M5XEQ7	M5XEQ7_PRUPE Uncharacterized protein OS=Prunus persica GN=PRUPE_ppa006533mg PE=4 SV=1	ppp:PHYPADRAFT_199427	hypothetical protein ; K01692 enoyl-CoA hydratase [EC:4.2.1.17]	PF00378.15|ECH; PF13766.1|ECH_C; PB002828|Pfam-B_2828	IPR001753|Crotonase superfamily	GO:0008152|metabolic process ; GO:0003824|catalytic activity	16	16	20	45	-0.0178576	-1.15742	0.04	3.46	0	-1
Gh_D11G0931	D11	-	8074417	8078758	AT1G01710	Acyl-CoA thioesterase family protein	P58137	ACOT8_MOUSE Acyl-coenzyme A thioesterase 8 OS=Mus musculus GN=Acot8 PE=1 SV=1	E4MWI3	E4MWI3_THEHA mRNA, clone: RTFL01-11-K11 OS=Thellungiella halophila PE=2 SV=1	ath:AT1G01710	acyl-CoA thioesterase family protein ; K01068 palmitoyl-CoA hydrolase [EC:3.1.2.2]	PB014266|Pfam-B_14266; PF13622.1|4HBT_3	IPR003703|Acyl-CoA thioesterase	GO:0047617|acyl-CoA hydrolase activity; GO:0006637|acyl-CoA metabolic process	9	21	9	28	-1.25593	-1.55297	1.82	2.28	-1	-1
Gh_D12G0013	D12	-	271111	273353	AT1G04290	Thioesterase superfamily protein	Q5R833	ACO13_PONAB Acyl-coenzyme A thioesterase 13 OS=Pongo abelii GN=ACOT13 PE=2 SV=1	A9PCW5	A9PCW5_POPTR Predicted protein OS=Populus trichocarpa GN=POPTRDRAFT_556283 PE=2 SV=1			PF03061.17|4HBT	IPR006683|Thioesterase superfamily		6	13	13	27	-1.2164	-1.06133	0.83	1.33	0	-1
Gh_A02G0603	A02	-	9393400	9394869	AT1G48320	Thioesterase superfamily protein	P45083	Y1161_HAEIN Putative esterase HI_1161 OS=Haemophilus influenzae (strain ATCC 51907 / DSM 11121 / KW20 / Rd) GN=HI_1161 PE=1 SV=1	B9S024	B9S024_RICCO Acyl-CoA thioesterase, putative OS=Ricinus communis GN=RCOM_1004050 PE=4 SV=1			PF03061.17|4HBT	IPR006683|Thioesterase superfamily		16	10	7	15	0.612386	-1.03157	1.02	1.44	0	-1
Gh_D12G1302	D12	+	41375649	41380557	AT3G06860	multifunctional protein 2	Q39659	MFPA_CUCSA Glyoxysomal fatty acid beta-oxidation multifunctional protein MFP-a OS=Cucumis sativus PE=1 SV=1	G7JLJ7	G7JLJ7_MEDTR Glyoxysomal fatty acid beta-oxidation multifunctional protein MFP-a OS=Medicago truncatula GN=MTR_4g120130 PE=4 SV=1	osa:4326503	Os01g0348600; hypothetical protein ; K10527 enoyl-CoA hydratase/3-hydroxyacyl-CoA dehydrogenase [EC:1.1.1.211 1.1.1.35 4.2.1.17]	PB008396|Pfam-B_8396; PF02737.13|3HCDH_N; PB004574|Pfam-B_4574	IPR006176|3-hydroxyacyl-CoA dehydrogenase, NAD binding	GO:0006631|fatty acid metabolic process ; GO:0003857|3-hydroxyacyl-CoA dehydrogenase activity ; GO:0055114|oxidation-reduction process ; GO:0016491|oxidoreductase activity	2	6	7	16	-1.56856	-1.29015	1.44	2.42	-1	-1
Gh_A12G0316	A12	-	5601337	5604136	AT4G29010	Enoyl-CoA hydratase/isomerase family	Q8W1L6	MFP_ORYSJ Peroxisomal fatty acid beta-oxidation multifunctional protein OS=Oryza sativa subsp. japonica GN=MFP PE=1 SV=2	E7CQZ7	E7CQZ7_GOSHI MFP OS=Gossypium hirsutum PE=2 SV=1	osa:4328997	Os02g0274100; hypothetical protein ; K10527 enoyl-CoA hydratase/3-hydroxyacyl-CoA dehydrogenase [EC:1.1.1.211 1.1.1.35 4.2.1.17]		IPR024111|Peroxisomal targeting signal 1 receptor family; IPR024113|Peroxisomal targeting signal 1 receptor		5	11	8	33	-1.16643	-2.10541	0.77	2	0	-1
Gh_A05G0067	A05	+	853657	859753	AT5G20410	monogalactosyldiacylglycerol synthase 2	O82730	MGDG2_ARATH Monogalactosyldiacylglycerol synthase 2, chloroplastic OS=Arabidopsis thaliana GN=MGD2 PE=1 SV=1	K4DC70	K4DC70_SOLLC Uncharacterized protein OS=Solanum lycopersicum GN=Solyc12g009820.1 PE=4 SV=1	ath:AT5G20410	MGD2; MGD2 (monogalactosyldiacylglycerol synthase 2); 1,2-diacylglycerol 3-beta-galactosyltransferase/ transferase, transferring glycosyl groups ; K03715 1,2-diacylglycerol 3-beta-galactosyltransferase [EC:2.4.1.46]	PF04101.11|Glyco_tran_28_C; PF04062.9|P21-Arc; PF06925.6|MGDG_synth	IPR007204|ARP2/3 complex, 21kDa subunit (p21-Arc); IPR007235|Glycosyl transferase, family 28, C-terminal; IPR009695|Diacylglycerol glucosyltransferase, N-terminal	GO:0030833|regulation of actin filament polymerization ; GO:0005856|cytoskeleton ; GO:0009247|glycolipid biosynthetic process ; GO:0005885|Arp2/3 protein complex ; GO:0034314|Arp2/3 complex-mediated actin nucleation ; GO:0030259|lipid glycosylation ; GO:0016758|transferase activity, transferring hexosyl groups ; GO:0030246|carbohydrate binding ; GO:0005975|carbohydrate metabolic process	2	4	9	20	-1.25282	-1.16857	0.72	2.1	0	-1
Gh_A11G2830	A11	-	91682275	91687934	AT3G11670	UDP-Glycosyltransferase superfamily protein	Q6DW74	DGDG1_LOTJA Digalactosyldiacylglycerol synthase 1, chloroplastic OS=Lotus japonicus GN=DGD1 PE=2 SV=1	B9T6N2	B9T6N2_RICCO Galactolipid galactosyltransferase, putative OS=Ricinus communis GN=RCOM_0322290 PE=4 SV=1	ath:AT3G11670	DGD1; DGD1 (DIGALACTOSYL DIACYLGLYCEROL DEFICIENT 1); galactolipid galactosyltransferase/ transferase, transferring glycosyl groups ; K09480 digalactosyldiacylglycerol synthase [EC:2.4.1.241]	PF00534.15|Glycos_transf_1; PB002734|Pfam-B_2734; PB006794|Pfam-B_6794; PB003617|Pfam-B_3617; PB008461|Pfam-B_8461	IPR001296|Glycosyl transferase, family 1	GO:0009058|biosynthetic process	12	10	15	31	0.226528	-1.07367	0.17	1.48	0	-1
Gh_A04G0761	A04	-	51660891	51663703	AT5G01220	sulfoquinovosyldiacylglycerol 2	O06423	MGTA_MYCTU GDP-mannose-dependent alpha-mannosyltransferase OS=Mycobacterium tuberculosis GN=mgtA PE=1 SV=1	B9HCK5	B9HCK5_POPTR Predicted protein (Fragment) OS=Populus trichocarpa GN=POPTRDRAFT_417124 PE=2 SV=1	ath:AT5G01220	SQD2; SQD2 (SULFOQUINOVOSYLDIACYLGLYCEROL 2); UDP-sulfoquinovose:DAG sulfoquinovosyltransferase/ transferase, transferring glycosyl groups ; K06119 sulfoquinovosyltransferase [EC:2.4.1.-]	PF00534.15|Glycos_transf_1; PF13579.1|Glyco_trans_4_4	IPR001296|Glycosyl transferase, family 1	GO:0009058|biosynthetic process	17	6	9	16	1.44489	-0.77768	1.52	1.02	1	0
Gh_D10G1379	D10	+	27360056	27362123	AT3G53180	glutamate-ammonia ligases;catalytics;glutamate-ammonia ligases	P38094	FLUG_EMENI Protein fluG OS=Emericella nidulans (strain FGSC A4 / ATCC 38163 / CBS 112.46 / NRRL 194 / M139) GN=fluG PE=1 SV=1	I3RZ67	I3RZ67_LOTJA Uncharacterized protein OS=Lotus japonicus PE=2 SV=1	ath:AT2G03430	ankyrin repeat family protein ; K06694 26S proteasome non-ATPase regulatory subunit 10	PF12796.2|Ank_2; PF00120.19|Gln-synt_C	IPR002110|Ankyrin repeat; IPR008146|Glutamine synthetase, catalytic domain; IPR020683|Ankyrin repeat-containing domain	GO:0006807|nitrogen compound metabolic process ; GO:0005515|protein binding ; GO:0004356|glutamate-ammonia ligase activity	5	7	6	18	-0.530628	-1.52305	0.7	2.42	0	-1
Gh_D02G0311	D02	+	4231873	4234356	AT5G35630	glutamine synthetase 2	P15102	GLNA4_PHAVU Glutamine synthetase leaf isozyme, chloroplastic OS=Phaseolus vulgaris PE=1 SV=1	B9RST2	B9RST2_RICCO Glutamine synthetase OS=Ricinus communis GN=RCOM_0678350 PE=3 SV=1	pop:POPTR_725763	hypothetical protein ; K01915 glutamine synthetase [EC:6.3.1.2]	PF03951.14|Gln-synt_N; PF00120.19|Gln-synt_C	IPR008146|Glutamine synthetase, catalytic domain; IPR008147|Glutamine synthetase, beta-Grasp; IPR027302|Glutamine synthetase, N-terminal conserved site; IPR027303|Glutamine synthetase, glycine-rich site	GO:0006807|nitrogen compound metabolic process ; GO:0004356|glutamate-ammonia ligase activity ; GO:0006542|glutamine biosynthetic process	60	18	49	21	1.70679	1.19967	2.8	2.32	1	1
Gh_A02G0242	A02	+	3009830	3012478	AT5G35630	glutamine synthetase 2	P15102	GLNA4_PHAVU Glutamine synthetase leaf isozyme, chloroplastic OS=Phaseolus vulgaris PE=1 SV=1	B9RST2	B9RST2_RICCO Glutamine synthetase OS=Ricinus communis GN=RCOM_0678350 PE=3 SV=1	pop:POPTR_725763	hypothetical protein ; K01915 glutamine synthetase [EC:6.3.1.2]	PF03951.14|Gln-synt_N; PF00120.19|Gln-synt_C	IPR008146|Glutamine synthetase, catalytic domain; IPR008147|Glutamine synthetase, beta-Grasp; IPR027302|Glutamine synthetase, N-terminal conserved site; IPR027303|Glutamine synthetase, glycine-rich site	GO:0006807|nitrogen compound metabolic process ; GO:0004356|glutamate-ammonia ligase activity ; GO:0006542|glutamine biosynthetic process	61	20	35	23	1.6134	0.574026	2.52	1.04	1	0
Gh_A04G0928	A04	-	58259573	58263257	AT5G37600	glutamine synthase clone R1	P32289	GLNA_VIGAC Glutamine synthetase nodule isozyme OS=Vigna aconitifolia PE=2 SV=1	D2D304	D2D304_GOSHI Glutamine synthetase OS=Gossypium hirsutum PE=2 SV=1	pop:POPTR_819912	hypothetical protein ; K01915 glutamine synthetase [EC:6.3.1.2]	PF03951.14|Gln-synt_N; PF00120.19|Gln-synt_C	IPR008146|Glutamine synthetase, catalytic domain; IPR008147|Glutamine synthetase, beta-Grasp; IPR027302|Glutamine synthetase, N-terminal conserved site; IPR027303|Glutamine synthetase, glycine-rich site	GO:0006807|nitrogen compound metabolic process ; GO:0004356|glutamate-ammonia ligase activity ; GO:0006542|glutamine biosynthetic process	651	253	192	203	1.36319	-0.0789079	2.69	0.1	1	0
Gh_D04G1445	D04	-	46139381	46143104	AT5G37600	glutamine synthase clone R1	P32289	GLNA_VIGAC Glutamine synthetase nodule isozyme OS=Vigna aconitifolia PE=2 SV=1	D2D304	D2D304_GOSHI Glutamine synthetase OS=Gossypium hirsutum PE=2 SV=1	pop:POPTR_819912	hypothetical protein ; K01915 glutamine synthetase [EC:6.3.1.2]	PF03951.14|Gln-synt_N; PF00120.19|Gln-synt_C	IPR008146|Glutamine synthetase, catalytic domain; IPR008147|Glutamine synthetase, beta-Grasp; IPR027302|Glutamine synthetase, N-terminal conserved site; IPR027303|Glutamine synthetase, glycine-rich site	GO:0006807|nitrogen compound metabolic process ; GO:0004356|glutamate-ammonia ligase activity ; GO:0006542|glutamine biosynthetic process	513	222	156	167	1.21096	-0.098729	2.83	0.15	1	0
Gh_D12G2120	D12	+	54263798	54266026	AT5G07440	glutamate dehydrogenase 2	Q38946	DHE2_ARATH Glutamate dehydrogenase 2 OS=Arabidopsis thaliana GN=GDH2 PE=1 SV=1	M5WMA0	M5WMA0_PRUPE Uncharacterized protein OS=Prunus persica GN=PRUPE_ppa006458mg PE=4 SV=1	ath:AT5G07440	GDH2; GDH2 (GLUTAMATE DEHYDROGENASE 2); oxidoreductase ; K00261 glutamate dehydrogenase (NAD(P)+) [EC:1.4.1.3]	PF02812.13|ELFV_dehydrog_N; PF00208.16|ELFV_dehydrog	IPR006095|Glutamate/phenylalanine/leucine/valine dehydrogenase; IPR006096|Glutamate/phenylalanine/leucine/valine dehydrogenase, C-terminal; IPR006097|Glutamate/phenylalanine/leucine/valine dehydrogenase, dimerisation domain	GO:0006520|cellular amino acid metabolic process ; GO:0055114|oxidation-reduction process ; GO:0016491|oxidoreductase activity	4	5	10	23	-0.430469	-1.25005	0.97	3.79	0	-1
Gh_D11G2666	D11	-	55408564	55410506	AT5G18170	glutamate dehydrogenase 1	Q43314	DHE1_ARATH Glutamate dehydrogenase 1 OS=Arabidopsis thaliana GN=GDH1 PE=2 SV=1	M5VQ31	M5VQ31_PRUPE Uncharacterized protein OS=Prunus persica GN=PRUPE_ppa006457mg PE=4 SV=1	vvi:100250450	GSVIVT00025474001; hypothetical protein LOC100250450 ; K00261 glutamate dehydrogenase (NAD(P)+) [EC:1.4.1.3]	PF02812.13|ELFV_dehydrog_N; PF00208.16|ELFV_dehydrog	IPR006095|Glutamate/phenylalanine/leucine/valine dehydrogenase; IPR006096|Glutamate/phenylalanine/leucine/valine dehydrogenase, C-terminal; IPR006097|Glutamate/phenylalanine/leucine/valine dehydrogenase, dimerisation domain	GO:0006520|cellular amino acid metabolic process ; GO:0055114|oxidation-reduction process ; GO:0016491|oxidoreductase activity	2	4	2	19	-1.02957	-3.17805	0.68	2.35	0	-1
Gh_D11G2111	D11	+	30735310	30739219	AT3G49645				M5W2X3	M5W2X3_PRUPE Uncharacterized protein (Fragment) OS=Prunus persica GN=PRUPE_ppa027144mg PE=4 SV=1						8	11	5	12	-0.381851	-1.30832	1.43	2.94	0	-1
Gh_A03G0997	A03	-	65176170	65178144	AT2G02010	glutamate decarboxylase 4	Q9ZPS3	DCE4_ARATH Glutamate decarboxylase 4 OS=Arabidopsis thaliana GN=GAD4 PE=2 SV=1	Q1I1D8	Q1I1D8_CITSI Glutamate decarboxylase OS=Citrus sinensis PE=2 SV=1	pop:POPTR_648236	hypothetical protein ; K01580 glutamate decarboxylase [EC:4.1.1.15]	PF00282.14|Pyridoxal_deC; PB000509|Pfam-B_509; PB001725|Pfam-B_1725; PB001838|Pfam-B_1838	IPR002129|Pyridoxal phosphate-dependent decarboxylase; IPR010107|Glutamate decarboxylase	GO:0019752|carboxylic acid metabolic process ; GO:0016831|carboxy-lyase activity ; GO:0006536|glutamate metabolic process; GO:0004351|glutamate decarboxylase activity; GO:0030170|pyridoxal phosphate binding	3	1	9	23	0.980843	-1.36431	0.34	2.02	0	-1
Gh_D02G1390	D02	-	46934911	46936895	AT2G02010	glutamate decarboxylase 4	Q9ZPS3	DCE4_ARATH Glutamate decarboxylase 4 OS=Arabidopsis thaliana GN=GAD4 PE=2 SV=1	Q1I1D8	Q1I1D8_CITSI Glutamate decarboxylase OS=Citrus sinensis PE=2 SV=1	pop:POPTR_648236	hypothetical protein ; K01580 glutamate decarboxylase [EC:4.1.1.15]	PF00282.14|Pyridoxal_deC; PB000509|Pfam-B_509; PB001725|Pfam-B_1725; PB001838|Pfam-B_1838	IPR002129|Pyridoxal phosphate-dependent decarboxylase; IPR010107|Glutamate decarboxylase	GO:0019752|carboxylic acid metabolic process ; GO:0016831|carboxy-lyase activity ; GO:0006536|glutamate metabolic process; GO:0004351|glutamate decarboxylase activity; GO:0030170|pyridoxal phosphate binding	2	3	8	16	-0.133543	-1.04597	0.08	2.05	0	-1
Gh_D13G0275	D13	+	2681628	2686724	AT2G22250	aspartate aminotransferase	E9L7A5	PAT_PETHY Bifunctional aspartate aminotransferase and glutamate/aspartate-prephenate aminotransferase OS=Petunia hybrida PE=1 SV=1	E5LBC4	E5LBC4_SOLLC Prephenate aminotransferase OS=Solanum lycopersicum GN=PAT PE=2 SV=1	mbr:MONBRDRAFT_34582	hypothetical protein ; K12586 exosome complex component RRP43	PF00155.16|Aminotran_1_2	IPR004838|Aminotransferases, class-I, pyridoxal-phosphate-binding site; IPR004839|Aminotransferase, class I/classII	GO:0009058|biosynthetic process ; GO:0003824|catalytic activity ; GO:0030170|pyridoxal phosphate binding	137	39	37	45	1.82371	-0.287006	2.57	0.34	1	0
Gh_D11G2214	D11	-	37029160	37034399	AT2G22250	aspartate aminotransferase	E9L7A5	PAT_PETHY Bifunctional aspartate aminotransferase and glutamate/aspartate-prephenate aminotransferase OS=Petunia hybrida PE=1 SV=1	E5LBC4	E5LBC4_SOLLC Prephenate aminotransferase OS=Solanum lycopersicum GN=PAT PE=2 SV=1	mbr:MONBRDRAFT_34582	hypothetical protein ; K12586 exosome complex component RRP43	PF00155.16|Aminotran_1_2	IPR004838|Aminotransferases, class-I, pyridoxal-phosphate-binding site; IPR004839|Aminotransferase, class I/classII	GO:0009058|biosynthetic process ; GO:0003824|catalytic activity ; GO:0030170|pyridoxal phosphate binding	54	23	16	30	1.23867	-0.869604	1.96	1.11	1	0
Gh_A11G1828	A11	+	38619594	38624885	AT2G22250	aspartate aminotransferase	E9L7A5	PAT_PETHY Bifunctional aspartate aminotransferase and glutamate/aspartate-prephenate aminotransferase OS=Petunia hybrida PE=1 SV=1	E5LBC4	E5LBC4_SOLLC Prephenate aminotransferase OS=Solanum lycopersicum GN=PAT PE=2 SV=1	mbr:MONBRDRAFT_34582	hypothetical protein ; K12586 exosome complex component RRP43	PF00155.16|Aminotran_1_2	IPR004838|Aminotransferases, class-I, pyridoxal-phosphate-binding site; IPR004839|Aminotransferase, class I/classII	GO:0009058|biosynthetic process ; GO:0003824|catalytic activity ; GO:0030170|pyridoxal phosphate binding	53	22	14	28	1.30737	-1.04752	2.76	1.85	1	-1
Gh_A13G0258	A13	+	3145013	3150074	AT2G22250	aspartate aminotransferase	E9L7A5	PAT_PETHY Bifunctional aspartate aminotransferase and glutamate/aspartate-prephenate aminotransferase OS=Petunia hybrida PE=1 SV=1	B9SSK3	B9SSK3_RICCO Aspartate aminotransferase, putative OS=Ricinus communis GN=RCOM_0984440 PE=3 SV=1	pop:POPTR_801257	hypothetical protein ; K10907 aminotransferase [EC:2.6.1.-]	PF00155.16|Aminotran_1_2	IPR004838|Aminotransferases, class-I, pyridoxal-phosphate-binding site; IPR004839|Aminotransferase, class I/classII	GO:0009058|biosynthetic process ; GO:0003824|catalytic activity ; GO:0030170|pyridoxal phosphate binding	43	13	11	22	1.77429	-0.955511	3.03	1.79	1	0
Gh_A07G0173	A07	+	2228758	2233796	AT5G11520	aspartate aminotransferase 3	P28734	AATC_DAUCA Aspartate aminotransferase, cytoplasmic OS=Daucus carota PE=2 SV=1	B9H919	B9H919_POPTR Aspartate aminotransferase OS=Populus trichocarpa GN=POPTRDRAFT_819550 PE=3 SV=1	pop:POPTR_819551	hypothetical protein ; K00813 aspartate aminotransferase [EC:2.6.1.1]	PF00155.16|Aminotran_1_2	IPR000796|Aspartate/other aminotransferase; IPR004838|Aminotransferases, class-I, pyridoxal-phosphate-binding site; IPR004839|Aminotransferase, class I/classII	GO:0009058|biosynthetic process ; GO:0006520|cellular amino acid metabolic process ; GO:0008483|transaminase activity ; GO:0003824|catalytic activity ; GO:0030170|pyridoxal phosphate binding	17	20	7	18	-0.211307	-1.28093	0.32	1.43	0	-1
Gh_D13G0613	D13	+	8541439	8543502	AT1G17290	alanine aminotransferas	F4I7I0	ALAT1_ARATH Alanine aminotransferase 1, mitochondrial OS=Arabidopsis thaliana GN=ALAAT1 PE=1 SV=1	B9N7I4	B9N7I4_POPTR Predicted protein OS=Populus trichocarpa GN=POPTRDRAFT_584163 PE=4 SV=1	pop:POPTR_1073568	hypothetical protein ; K00814 alanine transaminase [EC:2.6.1.2]	PF00155.16|Aminotran_1_2; PB017210|Pfam-B_17210; PB018256|Pfam-B_18256; PF00067.17|p450; PB002710|Pfam-B_2710	IPR001128|Cytochrome P450; IPR004839|Aminotransferase, class I/classII; IPR017972|Cytochrome P450, conserved site	GO:0009055|electron carrier activity ; GO:0020037|heme binding ; GO:0016705|oxidoreductase activity, acting on paired donors, with incorporation or reduction of molecular oxygen ; GO:0009058|biosynthetic process ; GO:0005506|iron ion binding ; GO:0055114|oxidation-reduction process ; GO:0030170|pyridoxal phosphate binding	6	3	12	29	1.02161	-1.27465	0.76	2.41	0	-1
Gh_A09G1477	A09	+	67989000	67993107	AT2G37500	arginine biosynthesis protein ArgJ family	B9SZB6	ARGJ_RICCO Arginine biosynthesis bifunctional protein ArgJ, chloroplastic OS=Ricinus communis GN=RCOM_1202350 PE=3 SV=1	D7TQ89	D7TQ89_VITVI Arginine biosynthesis bifunctional protein ArgJ, chloroplastic OS=Vitis vinifera GN=VIT_08s0040g03320 PE=3 SV=1	vvi:100253362	hypothetical protein LOC100253362 ; K00620 glutamate N-acetyltransferase / amino-acid N-acetyltransferase [EC:2.3.1.1 2.3.1.35]	PF01960.13|ArgJ	IPR002813|Arginine biosynthesis protein ArgJ	GO:0004358|glutamate N-acetyltransferase activity ; GO:0006526|arginine biosynthetic process	13	15	9	18	-0.281167	-1.04019	0.43	1.52	0	-1
Gh_A13G0329	A13	+	4087648	4090709	AT2G19940	oxidoreductases, acting on the aldehyde or oxo group of donors, NAD or NADP as acceptor;copper ion binding	Q93Z70	ARGC_ARATH Probable N-acetyl-gamma-glutamyl-phosphate reductase, chloroplastic OS=Arabidopsis thaliana GN=At2g19940 PE=1 SV=2	R0I2Y6	R0I2Y6_9BRAS Uncharacterized protein OS=Capsella rubella GN=CARUB_v10013854mg PE=4 SV=1	ath:AT2G19940	semialdehyde dehydrogenase family protein ; K00145 N-acetyl-gamma-glutamyl-phosphate reductase [EC:1.2.1.38]	PF02774.13|Semialdhyde_dhC; PF01118.19|Semialdhyde_dh	IPR000534|Semialdehyde dehydrogenase, NAD-binding; IPR012280|Semialdehyde dehydrogenase, dimerisation domain; IPR023013|N-acetyl-gamma-glutamyl-phosphate reductase, active site	GO:0016620|oxidoreductase activity, acting on the aldehyde or oxo group of donors, NAD or NADP as acceptor ; GO:0008652|cellular amino acid biosynthetic process ; GO:0003942|N-acetyl-gamma-glutamyl-phosphate reductase activity ; GO:0006520|cellular amino acid metabolic process ; GO:0051287|NAD binding ; GO:0055114|oxidation-reduction process ; GO:0005737|cytoplasm ; GO:0046983|protein dimerizatio…	10	13	10	29	-0.334006	-1.52998	0.41	2.16	0	-1
Gh_A07G0951	A07	-	17711758	17715096	AT3G47340	glutamine-dependent asparagine synthase 1	P49078	ASNS1_ARATH Asparagine synthetase [glutamine-hydrolyzing] 1 OS=Arabidopsis thaliana GN=ASN1 PE=2 SV=2	I0B673	I0B673_GOSHI Asparagine synthetase OS=Gossypium hirsutum PE=2 SV=1	vvi:100241610	hypothetical protein LOC100241610 ; K01953 asparagine synthase (glutamine-hydrolysing) [EC:6.3.5.4]	PB011735|Pfam-B_11735; PF13537.1|GATase_7; PF00733.16|Asn_synthase	IPR000583|Class II glutamine amidotransferase domain; IPR001962|Asparagine synthase; IPR017932|Glutamine amidotransferase type 2 domain	GO:0008152|metabolic process ; GO:0006529|asparagine biosynthetic process ; GO:0004066|asparagine synthase (glutamine-hydrolyzing) activity	3	9	10	26	-1.51413	-1.39989	0.81	1.62	0	-1
Gh_Sca004949G01	scaffold4949	+	2751	6189	AT3G47340	glutamine-dependent asparagine synthase 1	P49092	ASNS1_LOTJA Asparagine synthetase [glutamine-hydrolyzing] 1 OS=Lotus japonicus GN=AS1 PE=1 SV=2	I0B673	I0B673_GOSHI Asparagine synthetase OS=Gossypium hirsutum PE=2 SV=1	vvi:100241610	hypothetical protein LOC100241610 ; K01953 asparagine synthase (glutamine-hydrolysing) [EC:6.3.5.4]	PB011735|Pfam-B_11735; PB008145|Pfam-B_8145; PF13537.1|GATase_7; PF00733.16|Asn_synthase	IPR000583|Class II glutamine amidotransferase domain; IPR001962|Asparagine synthase; IPR017932|Glutamine amidotransferase type 2 domain	GO:0008152|metabolic process ; GO:0006529|asparagine biosynthetic process ; GO:0004066|asparagine synthase (glutamine-hydrolyzing) activity	2	1	12	28	0.287694	-1.21377	0.05	1.64	0	-1
Gh_D05G0328	D05	-	2787148	2788743	AT4G29840	Pyridoxal-5\'-phosphate-dependent enzyme family protein	Q9S7B5	THRC1_ARATH Threonine synthase 1, chloroplastic OS=Arabidopsis thaliana GN=TS1 PE=1 SV=1	B9RK44	B9RK44_RICCO Threonine synthase, putative OS=Ricinus communis GN=RCOM_1046290 PE=4 SV=1	vvi:100266217	GSVIVT00016507001; hypothetical protein LOC100266217 ; K01733 threonine synthase [EC:4.2.3.1]	PF00291.20|PALP	IPR000634|Serine/threonine dehydratase, pyridoxal-phosphate-binding site; IPR001926|Tryptophan synthase beta subunit-like PLP-dependent enzymes superfamily	GO:0006520|cellular amino acid metabolic process ; GO:0030170|pyridoxal phosphate binding	22	10	36	37	1.13943	-0.0252468	1.35	0.04	1	0
Gh_A13G1464	A13	-	72720751	72724303	AT5G17920	Cobalamin-independent synthase family protein	Q42699	METE_CATRO 5-methyltetrahydropteroyltriglutamate--homocysteine methyltransferase OS=Catharanthus roseus GN=METE PE=2 SV=1	A6YGE7	A6YGE7_CARPA Methionine synthase OS=Carica papaya PE=1 SV=1	pop:POPTR_573959	MS4; vitamin-b12 independent methionine synthase, 5-methyltetrahydropteroyltriglutamate-homocysteine ; K00549 5-methyltetrahydropteroyltriglutamate--homocysteine methyltransferase [EC:2.1.1.14]	PF08267.7|Meth_synt_1; PF01717.13|Meth_synt_2	IPR002629|Methionine synthase, vitamin-B12 independent; IPR013215|Cobalamin (vitamin B12)-independent methionine synthase MetE, N-terminal	GO:0008652|cellular amino acid biosynthetic process ; GO:0008270|zinc ion binding ; GO:0009086|methionine biosynthetic process ; GO:0003871|5-methyltetrahydropteroyltriglutamate-homocysteine S-methyltransferase activity	435	196	456	444	1.14886	0.0389062	1.92	0.08	1	0
Gh_D13G1732	D13	+	51881226	51884789	AT5G17920	Cobalamin-independent synthase family protein	Q42699	METE_CATRO 5-methyltetrahydropteroyltriglutamate--homocysteine methyltransferase OS=Catharanthus roseus GN=METE PE=2 SV=1	A6YGE7	A6YGE7_CARPA Methionine synthase OS=Carica papaya PE=1 SV=1	pop:POPTR_573959	MS4; vitamin-b12 independent methionine synthase, 5-methyltetrahydropteroyltriglutamate-homocysteine ; K00549 5-methyltetrahydropteroyltriglutamate--homocysteine methyltransferase [EC:2.1.1.14]	PF08267.7|Meth_synt_1; PF01717.13|Meth_synt_2	IPR002629|Methionine synthase, vitamin-B12 independent; IPR013215|Cobalamin (vitamin B12)-independent methionine synthase MetE, N-terminal	GO:0008652|cellular amino acid biosynthetic process ; GO:0008270|zinc ion binding ; GO:0009086|methionine biosynthetic process ; GO:0003871|5-methyltetrahydropteroyltriglutamate-homocysteine S-methyltransferase activity	353	167	450	395	1.07691	0.190926	2.02	0.59	1	0
Gh_A13G0801	A13	+	37428112	37431821	AT5G17920	Cobalamin-independent synthase family protein	P93263	METE_MESCR 5-methyltetrahydropteroyltriglutamate--homocysteine methyltransferase OS=Mesembryanthemum crystallinum GN=METE PE=2 SV=1	A6YGE7	A6YGE7_CARPA Methionine synthase OS=Carica papaya PE=1 SV=1	pop:POPTR_573959	MS4; vitamin-b12 independent methionine synthase, 5-methyltetrahydropteroyltriglutamate-homocysteine ; K00549 5-methyltetrahydropteroyltriglutamate--homocysteine methyltransferase [EC:2.1.1.14]	PF08267.7|Meth_synt_1; PF01717.13|Meth_synt_2	IPR002629|Methionine synthase, vitamin-B12 independent; IPR013215|Cobalamin (vitamin B12)-independent methionine synthase MetE, N-terminal	GO:0008652|cellular amino acid biosynthetic process ; GO:0008270|zinc ion binding ; GO:0009086|methionine biosynthetic process ; GO:0003871|5-methyltetrahydropteroyltriglutamate-homocysteine S-methyltransferase activity	73	35	91	97	1.0586	-0.0930739	1.59	0.2	1	0
Gh_D11G3085	D11	-	62833885	62840344	AT3G57050	cystathionine beta-lyase	P53780	METC_ARATH Cystathionine beta-lyase, chloroplastic OS=Arabidopsis thaliana GN=At3g57050 PE=1 SV=1	I1JN71	I1JN71_SOYBN Uncharacterized protein OS=Glycine max PE=3 SV=1	vvi:100260731	hypothetical protein LOC100260731 ; K01760 cystathionine beta-lyase [EC:4.4.1.8]	PF01053.15|Cys_Met_Meta_PP	IPR000277|Cys/Met metabolism, pyridoxal phosphate-dependent enzyme; IPR006238|Cystathionine beta-lyase, eukaryotic	GO:0004121|cystathionine beta-lyase activity; GO:0071266|'de novo' L-methionine biosynthetic process; GO:0030170|pyridoxal phosphate binding	16	15	20	41	0.0663695	-1.04067	0.12	2.74	0	-1
Gh_D08G1348	D08	+	44231058	44232239	AT1G02500	S-adenosylmethionine synthetase 1	Q9AT55	METK2_ELAUM S-adenosylmethionine synthase 2 OS=Elaeagnus umbellata GN=SAMS2 PE=2 SV=1	H6UJ33	H6UJ33_CAJCA S-adenosylmethionine synthetase OS=Cajanus cajan PE=2 SV=1	vvi:100244176	GSVIVT00019707001; S-adenosylmethionine synthetase 2 ; K00789 S-adenosylmethionine synthetase [EC:2.5.1.6]	PF02772.11|S-AdoMet_synt_M; PF00438.15|S-AdoMet_synt_N; PF02773.11|S-AdoMet_synt_C	IPR002133|S-adenosylmethionine synthetase; IPR022628|S-adenosylmethionine synthetase, N-terminal; IPR022629|S-adenosylmethionine synthetase, central domain; IPR022630|S-adenosylmethionine synthetase, C-terminal; IPR022631|S-adenosylmethionine synthetase, conserved site	GO:0005524|ATP binding ; GO:0004478|methionine adenosyltransferase activity ; GO:0006556|S-adenosylmethionine biosynthetic process	159	62	317	502	1.35272	-0.66414	1.37	1.89	1	0
Gh_A08G1067	A08	+	73601857	73603038	AT1G02500	S-adenosylmethionine synthetase 1	Q9AT55	METK2_ELAUM S-adenosylmethionine synthase 2 OS=Elaeagnus umbellata GN=SAMS2 PE=2 SV=1	H6UJ33	H6UJ33_CAJCA S-adenosylmethionine synthetase OS=Cajanus cajan PE=2 SV=1	vvi:100244176	GSVIVT00019707001; S-adenosylmethionine synthetase 2 ; K00789 S-adenosylmethionine synthetase [EC:2.5.1.6]	PF02772.11|S-AdoMet_synt_M; PF00438.15|S-AdoMet_synt_N; PF02773.11|S-AdoMet_synt_C	IPR002133|S-adenosylmethionine synthetase; IPR022628|S-adenosylmethionine synthetase, N-terminal; IPR022629|S-adenosylmethionine synthetase, central domain; IPR022630|S-adenosylmethionine synthetase, C-terminal; IPR022631|S-adenosylmethionine synthetase, conserved site	GO:0005524|ATP binding ; GO:0004478|methionine adenosyltransferase activity ; GO:0006556|S-adenosylmethionine biosynthetic process	166	61	254	381	1.45593	-0.586994	1.8	1.81	1	0
Gh_D12G1222	D12	-	40040076	40041257	AT1G02500	S-adenosylmethionine synthetase 1	Q9AT56	METK1_ELAUM S-adenosylmethionine synthase 1 OS=Elaeagnus umbellata GN=SAMS1 PE=2 SV=1	E2GMU6	E2GMU6_GOSHI S-adenosylmethionine synthetase OS=Gossypium hirsutum GN=SAMS PE=2 SV=1	vvi:100244176	GSVIVT00019707001; S-adenosylmethionine synthetase 2 ; K00789 S-adenosylmethionine synthetase [EC:2.5.1.6]	PF02772.11|S-AdoMet_synt_M; PF00438.15|S-AdoMet_synt_N; PF02773.11|S-AdoMet_synt_C	IPR002133|S-adenosylmethionine synthetase; IPR022628|S-adenosylmethionine synthetase, N-terminal; IPR022629|S-adenosylmethionine synthetase, central domain; IPR022630|S-adenosylmethionine synthetase, C-terminal; IPR022631|S-adenosylmethionine synthetase, conserved site	GO:0005524|ATP binding ; GO:0004478|methionine adenosyltransferase activity ; GO:0006556|S-adenosylmethionine biosynthetic process	191	94	219	311	1.02934	-0.502572	1.53	1.29	1	0
Gh_D07G1294	D07	+	20357174	20358355	AT4G01850	S-adenosylmethionine synthetase 2	Q9AT56	METK1_ELAUM S-adenosylmethionine synthase 1 OS=Elaeagnus umbellata GN=SAMS1 PE=2 SV=1	E2GMU6	E2GMU6_GOSHI S-adenosylmethionine synthetase OS=Gossypium hirsutum GN=SAMS PE=2 SV=1	pop:POPTR_834837	AdoMet4; s-adenosylmethionine synthetase 4 (EC:2.5.1.6); K00789 S-adenosylmethionine synthetase [EC:2.5.1.6]	PF02772.11|S-AdoMet_synt_M; PF00438.15|S-AdoMet_synt_N; PF02773.11|S-AdoMet_synt_C	IPR002133|S-adenosylmethionine synthetase; IPR022628|S-adenosylmethionine synthetase, N-terminal; IPR022629|S-adenosylmethionine synthetase, central domain; IPR022630|S-adenosylmethionine synthetase, C-terminal; IPR022631|S-adenosylmethionine synthetase, conserved site	GO:0005524|ATP binding ; GO:0004478|methionine adenosyltransferase activity ; GO:0006556|S-adenosylmethionine biosynthetic process	253	73	224	304	1.79747	-0.43902	2.32	1.23	1	0
Gh_A07G1193	A07	+	26350337	26351107	AT4G01850	S-adenosylmethionine synthetase 2	Q9AT55	METK2_ELAUM S-adenosylmethionine synthase 2 OS=Elaeagnus umbellata GN=SAMS2 PE=2 SV=1	H6UJ33	H6UJ33_CAJCA S-adenosylmethionine synthetase OS=Cajanus cajan PE=2 SV=1	pop:POPTR_834837	AdoMet4; s-adenosylmethionine synthetase 4 (EC:2.5.1.6); K00789 S-adenosylmethionine synthetase [EC:2.5.1.6]	PF02772.11|S-AdoMet_synt_M; PF02773.11|S-AdoMet_synt_C	IPR002133|S-adenosylmethionine synthetase; IPR022629|S-adenosylmethionine synthetase, central domain; IPR022630|S-adenosylmethionine synthetase, C-terminal; IPR022631|S-adenosylmethionine synthetase, conserved site	GO:0005524|ATP binding ; GO:0004478|methionine adenosyltransferase activity ; GO:0006556|S-adenosylmethionine biosynthetic process	52	16	45	74	1.71386	-0.706299	1.81	1.46	1	0
Gh_A11G0966	A11	-	10519463	10520644	AT4G01850	S-adenosylmethionine synthetase 2	Q9AT55	METK2_ELAUM S-adenosylmethionine synthase 2 OS=Elaeagnus umbellata GN=SAMS2 PE=2 SV=1	H6UJ33	H6UJ33_CAJCA S-adenosylmethionine synthetase OS=Cajanus cajan PE=2 SV=1	vvi:100244176	GSVIVT00019707001; S-adenosylmethionine synthetase 2 ; K00789 S-adenosylmethionine synthetase [EC:2.5.1.6]	PF02772.11|S-AdoMet_synt_M; PF00438.15|S-AdoMet_synt_N; PF02773.11|S-AdoMet_synt_C	IPR002133|S-adenosylmethionine synthetase; IPR022628|S-adenosylmethionine synthetase, N-terminal; IPR022629|S-adenosylmethionine synthetase, central domain; IPR022630|S-adenosylmethionine synthetase, C-terminal; IPR022631|S-adenosylmethionine synthetase, conserved site	GO:0005524|ATP binding ; GO:0004478|methionine adenosyltransferase activity ; GO:0006556|S-adenosylmethionine biosynthetic process	53	20	43	71	1.36186	-0.711576	1.51	1.26	1	0
Gh_A02G0322	A02	-	3825650	3829330	AT3G22740	homocysteine S-methyltransferase 3	Q8LAX0	HMT3_ARATH Homocysteine S-methyltransferase 3 OS=Arabidopsis thaliana GN=HMT3 PE=1 SV=2	B9RTM3	B9RTM3_RICCO 5-methyltetrahydrofolate:homocysteine methyltransferase, putative OS=Ricinus communis GN=RCOM_0911480 PE=4 SV=1	pop:POPTR_658494	HMT2; homocysteine s-methyltransferase (EC:2.1.1.10); K00547 homocysteine S-methyltransferase [EC:2.1.1.10]	PF02574.11|S-methyl_trans	IPR003726|Homocysteine S-methyltransferase	GO:0008898|homocysteine S-methyltransferase activity	1	1	8	19	-0.405465	-1.25642	0.09	1.83	0	-1
Gh_D05G1039	D05	+	8767120	8777841	AT5G49810	methionine S-methyltransferase	Q9LTB2	MMT1_ARATH Methionine S-methyltransferase OS=Arabidopsis thaliana GN=MMT1 PE=2 SV=1	M5Y1U1	M5Y1U1_PRUPE Uncharacterized protein OS=Prunus persica GN=PRUPE_ppa000568mg PE=4 SV=1	ath:AT5G49810	MMT; MMT (methionine S-methyltransferase); S-adenosylmethionine-dependent methyltransferase ; K08247 methionine S-methyltransferase [EC:2.1.1.12]	PF00155.16|Aminotran_1_2; PF12847.2|Methyltransf_18	IPR004839|Aminotransferase, class I/classII; IPR025779|Methionine S-methyltransferase	GO:0009058|biosynthetic process ; GO:0008168|methyltransferase activity ; GO:0030170|pyridoxal phosphate binding	53	34	35	72	0.621858	-1.04321	1.46	2.32	0	-1
Gh_D02G1975	D02	-	63703540	63704631	AT2G17265	homoserine kinase	A4SGN0	KHSE_PROVI Homoserine kinase OS=Prosthecochloris vibrioformis (strain DSM 265) GN=thrB PE=3 SV=1	B9RVC9	B9RVC9_RICCO Homoserine kinase, putative OS=Ricinus communis GN=RCOM_0902180 PE=3 SV=1	pop:POPTR_782581	hypothetical protein ; K00872 homoserine kinase [EC:2.7.1.39]	PF00288.21|GHMP_kinases_N; PF08544.8|GHMP_kinases_C	IPR000870|Homoserine kinase; IPR006203|GHMP kinase, ATP-binding, conserved site; IPR006204|GHMP kinase N-terminal domain; IPR013750|GHMP kinase, C-terminal domain	GO:0005524|ATP binding ; GO:0004413|homoserine kinase activity; GO:0006566|threonine metabolic process	52	25	67	60	1.08532	0.157062	2.27	0.57	1	0
Gh_Sca078021G01	scaffold78021	+	114	383	AT3G48560	chlorsulfuron/imidazolinone resistant 1	P27819	ILVB3_BRANA Acetolactate synthase 3, chloroplastic OS=Brassica napus PE=3 SV=1	O49810	O49810_BRATO Acetolactate synthase (Fragment) OS=Brassica tournefortii GN=ALS PE=4 SV=2	hmg:100199687	similar to 2-hydroxyacyl-CoA lyase 1 ; K01652 acetolactate synthase I/II/III large subunit [EC:2.2.1.6]	PF02776.13|TPP_enzyme_N	IPR012001|Thiamine pyrophosphate enzyme, N-terminal TPP-binding domain; IPR012846|Acetolactate synthase, large subunit, biosynthetic	GO:0000287|magnesium ion binding ; GO:0050660|flavin adenine dinucleotide binding ; GO:0030976|thiamine pyrophosphate binding ; GO:0009082|branched-chain amino acid biosynthetic process ; GO:0003984|acetolactate synthase activity	4	2	7	17	0.847298	-1.25682	0.3	1.3	0	-1
Gh_D02G0001	D02	-	5367	11225	AT3G58610	ketol-acid reductoisomerase	O82043	ILV5_PEA Ketol-acid reductoisomerase, chloroplastic OS=Pisum sativum GN=PGAAIR PE=1 SV=1	Q56WU3	Q56WU3_ARATH Ketol-acid reductoisomerase OS=Arabidopsis thaliana GN=At3g58610 PE=2 SV=1	vvi:100262542	GSVIVT00018719001; hypothetical protein LOC100262542 ; K00053 ketol-acid reductoisomerase [EC:1.1.1.86]	PB004060|Pfam-B_4060; PF01450.14|IlvC	IPR000506|Acetohydroxy acid isomeroreductase C-terminal; IPR013023|Acetohydroxy acid isomeroreductase	GO:0004455|ketol-acid reductoisomerase activity ; GO:0055114|oxidation-reduction process ; GO:0016491|oxidoreductase activity ; GO:0009082|branched-chain amino acid biosynthetic process	11	15	17	38	-0.41556	-1.13295	1.34	3.55	0	-1
Gh_A05G1855	A05	-	19418705	19421702	AT1G10070	branched-chain amino acid transaminase 2	Q9M439	BCAT2_ARATH Branched-chain-amino-acid aminotransferase 2, chloroplastic OS=Arabidopsis thaliana GN=BCAT2 PE=1 SV=1	B9R6U0	B9R6U0_RICCO Branched-chain amino acid aminotransferase, putative OS=Ricinus communis GN=RCOM_1585550 PE=3 SV=1	vvi:100260903	hypothetical protein LOC100260903 ; K00826 branched-chain amino acid aminotransferase [EC:2.6.1.42]	PF01063.14|Aminotran_4; PB006860|Pfam-B_6860	IPR001544|Aminotransferase, class IV; IPR005786|Branched-chain amino acid aminotransferase II; IPR018300|Aminotransferase, class IV, conserved site	GO:0004084|branched-chain-amino-acid transaminase activity; GO:0008152|metabolic process ; GO:0009081|branched-chain amino acid metabolic process; GO:0003824|catalytic activity	5	7	16	39	-0.47	-1.28389	0.15	1.34	0	-1
Gh_A10G1199	A10	-	62607701	62616353	AT1G74040	2-isopropylmalate synthase 1	Q9C550	LEU12_ARATH 2-isopropylmalate synthase 2, chloroplastic OS=Arabidopsis thaliana GN=IPMS2 PE=1 SV=1	B9SX30	B9SX30_RICCO Isopropylmalate synthase, putative OS=Ricinus communis GN=RCOM_1267040 PE=3 SV=1	pop:POPTR_861364	hypothetical protein ; K01649 2-isopropylmalate synthase [EC:2.3.3.13]	PF00682.14|HMGL-like; PF08502.5|LeuA_dimer; PB000679|Pfam-B_679; PB001005|Pfam-B_1005	IPR000891|Pyruvate carboxyltransferase; IPR002034|Alpha-isopropylmalate/homocitrate synthase, conserved site; IPR013709|2-isopropylmalate synthase LeuA, allosteric (dimerisation) domain	GO:0019752|carboxylic acid metabolic process ; GO:0009098|leucine biosynthetic process ; GO:0003852|2-isopropylmalate synthase activity ; GO:0046912|transferase activity, transferring acyl groups, acyl groups converted into alkyl on transfer ; GO:0003824|catalytic activity	82	91	86	192	-0.148093	-1.16142	0.11	1.39	0	-1
Gh_A03G0832	A03	-	43776069	43791151	AT1G74040	2-isopropylmalate synthase 1	Q9C550	LEU12_ARATH 2-isopropylmalate synthase 2, chloroplastic OS=Arabidopsis thaliana GN=IPMS2 PE=1 SV=1	B9SX30	B9SX30_RICCO Isopropylmalate synthase, putative OS=Ricinus communis GN=RCOM_1267040 PE=3 SV=1	pop:POPTR_861364	hypothetical protein ; K01649 2-isopropylmalate synthase [EC:2.3.3.13]	PF00682.14|HMGL-like; PF08502.5|LeuA_dimer; PB000679|Pfam-B_679; PB001939|Pfam-B_1939; PB001005|Pfam-B_1005	IPR000891|Pyruvate carboxyltransferase; IPR002034|Alpha-isopropylmalate/homocitrate synthase, conserved site; IPR013709|2-isopropylmalate synthase LeuA, allosteric (dimerisation) domain	GO:0019752|carboxylic acid metabolic process ; GO:0009098|leucine biosynthetic process ; GO:0003852|2-isopropylmalate synthase activity ; GO:0046912|transferase activity, transferring acyl groups, acyl groups converted into alkyl on transfer ; GO:0003824|catalytic activity	27	31	34	72	-0.216223	-1.08709	0.31	2.2	0	-1
Gh_A12G2082	A12	-	83683906	83685436	AT4G11640	serine racemase	Q2PGG3	SRR_ARATH Serine racemase OS=Arabidopsis thaliana GN=SR PE=1 SV=1	D7TW10	D7TW10_VITVI Putative uncharacterized protein OS=Vitis vinifera GN=VIT_02s0025g03670 PE=4 SV=1	ath:AT4G11640	ATSR; ATSR (ARABIDOPSIS THALIANA SIGNAL-RESPONSIVE); serine racemase ; K12235 serine racemase [EC:5.1.1.18]	PF00291.20|PALP	IPR000634|Serine/threonine dehydratase, pyridoxal-phosphate-binding site; IPR001926|Tryptophan synthase beta subunit-like PLP-dependent enzymes superfamily	GO:0006520|cellular amino acid metabolic process ; GO:0030170|pyridoxal phosphate binding	5	7	5	11	-0.451985	-1.08334	0.53	1.5	0	-1
Gh_D12G0199	D12	+	2641215	2644312	AT4G34200	D-3-phosphoglycerate dehydrogenase	O04130	SERA_ARATH D-3-phosphoglycerate dehydrogenase, chloroplastic OS=Arabidopsis thaliana GN=At1g17745 PE=1 SV=2	D2D316	D2D316_GOSHI Phosphoglycerate dehydrogenase OS=Gossypium hirsutum PE=2 SV=1	ath:AT4G34200	EDA9; EDA9 (embryo sac development arrest 9); NAD binding / amino acid binding / binding / catalytic/ cofactor binding / oxidoreductase, acting on the CH-OH group of donors, NAD or NADP as acceptor / phosphoglycerate dehydrogenase ; K00058 D-3-phosphoglycerate dehydrogenase [EC:1.1.1.95]	PF02826.14|2-Hacid_dh_C; PF00389.25|2-Hacid_dh; PF01842.20|ACT	IPR002912|ACT domain; IPR006139|D-isomer specific 2-hydroxyacid dehydrogenase, catalytic domain; IPR006140|D-isomer specific 2-hydroxyacid dehydrogenase, NAD-binding; IPR006236|D-3-phosphoglycerate dehydrogenase; IPR015878|S-adenosyl-L-homocysteine hydrolase, NAD binding domain	GO:0016616|oxidoreductase activity, acting on the CH-OH group of donors, NAD or NADP as acceptor ; GO:0016597|amino acid binding ; GO:0008152|metabolic process ; GO:0051287|NAD binding ; GO:0048037|cofactor binding ; GO:0006564|L-serine biosynthetic process; GO:0055114|oxidation-reduction process ; GO:0004617|phosphoglycerate dehydrogenase activity	107	48	256	257	1.15417	-0.00502598	1.79	0.02	1	0
Gh_A13G0380	A13	-	5070297	5072562	AT4G34200	D-3-phosphoglycerate dehydrogenase	O04130	SERA_ARATH D-3-phosphoglycerate dehydrogenase, chloroplastic OS=Arabidopsis thaliana GN=At1g17745 PE=1 SV=2	D2D316	D2D316_GOSHI Phosphoglycerate dehydrogenase OS=Gossypium hirsutum PE=2 SV=1	ath:AT4G34200	EDA9; EDA9 (embryo sac development arrest 9); NAD binding / amino acid binding / binding / catalytic/ cofactor binding / oxidoreductase, acting on the CH-OH group of donors, NAD or NADP as acceptor / phosphoglycerate dehydrogenase ; K00058 D-3-phosphoglycerate dehydrogenase [EC:1.1.1.95]	PB016798|Pfam-B_16798; PF02826.14|2-Hacid_dh_C; PF00389.25|2-Hacid_dh; PF01842.20|ACT	IPR002912|ACT domain; IPR006139|D-isomer specific 2-hydroxyacid dehydrogenase, catalytic domain; IPR006140|D-isomer specific 2-hydroxyacid dehydrogenase, NAD-binding; IPR006236|D-3-phosphoglycerate dehydrogenase; IPR015878|S-adenosyl-L-homocysteine hydrolase, NAD binding domain	GO:0016616|oxidoreductase activity, acting on the CH-OH group of donors, NAD or NADP as acceptor ; GO:0016597|amino acid binding ; GO:0008152|metabolic process ; GO:0051287|NAD binding ; GO:0048037|cofactor binding ; GO:0006564|L-serine biosynthetic process; GO:0055114|oxidation-reduction process ; GO:0004617|phosphoglycerate dehydrogenase activity	46	35	39	92	0.405465	-1.24103	0.54	2	0	-1
Gh_A02G1157	A02	-	65124262	65126108	AT1G18640	3-phosphoserine phosphatase	O82796	SERB_ARATH Phosphoserine phosphatase, chloroplastic OS=Arabidopsis thaliana GN=PSP PE=1 SV=2	F6GSZ3	F6GSZ3_VITVI Putative uncharacterized protein OS=Vitis vinifera GN=VIT_17s0000g07310 PE=4 SV=1	ath:AT1G18640	PSP; PSP (3-PHOSPHOSERINE PHOSPHATASE) ; K01079 phosphoserine phosphatase [EC:3.1.3.3]				12	24	11	40	-1.01817	-1.90282	0.82	1.56	0	-1
Gh_A03G2100	scaffold582_A03	+	35809	40084	AT1G18640	3-phosphoserine phosphatase	O82796	SERB_ARATH Phosphoserine phosphatase, chloroplastic OS=Arabidopsis thaliana GN=PSP PE=1 SV=2	B9RLN8	B9RLN8_RICCO Phosphoserine phosphatase, putative OS=Ricinus communis GN=RCOM_1469840 PE=4 SV=1	pop:POPTR_569934	hypothetical protein ; K01079 phosphoserine phosphatase [EC:3.1.3.3]	PF00270.24|DEAD	IPR011545|DNA/RNA helicase, DEAD/DEAH box type, N-terminal	GO:0005524|ATP binding ; GO:0008026|ATP-dependent helicase activity ; GO:0003676|nucleic acid binding	2	10	5	28	-2.00533	-2.39375	0.95	1.92	0	-1
Gh_A07G2180	scaffold1716_A07	-	156797	159990	AT1G18640	3-phosphoserine phosphatase	O82796	SERB_ARATH Phosphoserine phosphatase, chloroplastic OS=Arabidopsis thaliana GN=PSP PE=1 SV=2	B9RLN8	B9RLN8_RICCO Phosphoserine phosphatase, putative OS=Ricinus communis GN=RCOM_1469840 PE=4 SV=1	pop:POPTR_569934	hypothetical protein ; K01079 phosphoserine phosphatase [EC:3.1.3.3]	PF00162.14|PGK; PF12710.2|HAD	IPR001576|Phosphoglycerate kinase; IPR015911|Phosphoglycerate kinase, conserved site	GO:0006096|glycolysis ; GO:0004618|phosphoglycerate kinase activity	4	6	5	14	-0.579758	-1.5439	0.4	1.53	0	-1
Gh_A06G0948	A06	+	42171060	42172292	AT2G24580	FAD-dependent oxidoreductase family protein	Q9SJA7	SOX_ARATH Probable sarcosine oxidase OS=Arabidopsis thaliana GN=At2g24580 PE=2 SV=1	B9ILE2	B9ILE2_POPTR Sarcosine oxidase OS=Populus trichocarpa GN=SOX1 PE=4 SV=1	ath:AT2G24580	sarcosine oxidase family protein ; K00301 sarcosine oxidase [EC:1.5.3.1]	PF01266.19|DAO	IPR006076|FAD dependent oxidoreductase	GO:0055114|oxidation-reduction process ; GO:0016491|oxidoreductase activity	7	10	24	54	-0.462624	-1.19565	0.16	1.35	0	-1
Gh_A11G0321	A11	+	2972002	2975358	AT1G18490	Protein of unknown function (DUF1637)	Q96SZ5	AEDO_HUMAN 2-aminoethanethiol dioxygenase OS=Homo sapiens GN=ADO PE=1 SV=2	E6NU47	E6NU47_9ROSI JHL10I11.3 protein OS=Jatropha curcas GN=JHL10I11.3 PE=4 SV=1	dre:406474	adob; 2-aminoethanethiol (cysteamine) dioxygenase b ; K10712 cysteamine dioxygenase [EC:1.13.11.19]	PF07847.7|DUF1637	IPR012864|Cysteamine dioxygenase	GO:0047800|cysteamine dioxygenase activity ; GO:0055114|oxidation-reduction process	15	14	15	33	0.0317487	-1.13496	0.03	1.65	0	-1
Gh_D05G3678	D05	+	61348021	61350980	AT1G55880	Pyridoxal-5\'-phosphate-dependent enzyme family protein	P87131	CYSK2_SCHPO Cysteine synthase 2 OS=Schizosaccharomyces pombe (strain 972 / ATCC 24843) GN=cys12 PE=3 SV=1	B9GFL5	B9GFL5_POPTR Cysteine synthase OS=Populus trichocarpa GN=POPTRDRAFT_707666 PE=3 SV=1	pop:POPTR_707666	hypothetical protein ; K01738 cysteine synthase A [EC:2.5.1.47]	PF00291.20|PALP	IPR001216|Cysteine synthase/cystathionine beta-synthase P-phosphate-binding site; IPR001926|Tryptophan synthase beta subunit-like PLP-dependent enzymes superfamily	GO:0006535|cysteine biosynthetic process from serine	6	8	8	21	-0.278713	-1.39268	0.37	2.45	0	-1
Gh_A04G0055	A04	-	589614	592530	AT1G55880	Pyridoxal-5\'-phosphate-dependent enzyme family protein	P87131	CYSK2_SCHPO Cysteine synthase 2 OS=Schizosaccharomyces pombe (strain 972 / ATCC 24843) GN=cys12 PE=3 SV=1	B9GFL5	B9GFL5_POPTR Cysteine synthase OS=Populus trichocarpa GN=POPTRDRAFT_707666 PE=3 SV=1	pop:POPTR_707666	hypothetical protein ; K01738 cysteine synthase A [EC:2.5.1.47]	PF00291.20|PALP	IPR001216|Cysteine synthase/cystathionine beta-synthase P-phosphate-binding site; IPR001926|Tryptophan synthase beta subunit-like PLP-dependent enzymes superfamily	GO:0006535|cysteine biosynthetic process from serine	6	7	7	18	-0.216224	-1.36399	1.21	4.53	0	-1
Gh_D13G1029	D13	-	27733787	27737826	AT3G03630	cysteine synthase 26	O22682	CYSK4_ARATH Probable cysteine synthase, chloroplastic OS=Arabidopsis thaliana GN=At3g03630 PE=1 SV=1	M5VVX3	M5VVX3_PRUPE Uncharacterized protein OS=Prunus persica GN=PRUPE_ppa007201mg PE=4 SV=1	vvi:100267217	hypothetical protein LOC100267217 ; K01738 cysteine synthase A [EC:2.5.1.47]	PF00291.20|PALP	IPR001216|Cysteine synthase/cystathionine beta-synthase P-phosphate-binding site; IPR001926|Tryptophan synthase beta subunit-like PLP-dependent enzymes superfamily	GO:0006535|cysteine biosynthetic process from serine	5	4	6	13	0.17185	-1.0116	0.13	1.52	0	-1
Gh_D13G1830	D13	+	53378760	53394127	AT3G04940	cysteine synthase D1	Q43317	CYSK_CITLA Cysteine synthase OS=Citrullus lanatus PE=1 SV=1	B9MZI2	B9MZI2_POPTR Predicted protein OS=Populus trichocarpa GN=POPTRDRAFT_595469 PE=4 SV=1	ath:AT3G04940	ATCYSD1 (Arabidopsis thaliana cysteine synthase D1); cysteine synthase ; K01738 cysteine synthase A [EC:2.5.1.47]	PF00291.20|PALP	IPR001216|Cysteine synthase/cystathionine beta-synthase P-phosphate-binding site; IPR001926|Tryptophan synthase beta subunit-like PLP-dependent enzymes superfamily	GO:0006535|cysteine biosynthetic process from serine	6	12	12	35	-0.93827	-1.55228	1.13	2.65	0	-1
Gh_A11G0809	A11	+	8048108	8051581	AT3G61440	cysteine synthase C1	Q1KLZ2	CAS1_MALDO L-3-cyanoalanine synthase 1, mitochondrial OS=Malus domestica GN=CAS1 PE=1 SV=1	Q5VLJ4	Q5VLJ4_HEVBR Cysteine synthase OS=Hevea brasiliensis PE=2 SV=1	pop:POPTR_644475	hypothetical protein ; K01738 cysteine synthase A [EC:2.5.1.47]	PF00291.20|PALP	IPR001216|Cysteine synthase/cystathionine beta-synthase P-phosphate-binding site; IPR001926|Tryptophan synthase beta subunit-like PLP-dependent enzymes superfamily	GO:0006535|cysteine biosynthetic process from serine	49	39	39	93	0.331034	-1.24843	0.29	1.45	0	-1
Gh_A02G1695	A02	+	83161752	83166344	AT4G35640	serine acetyltransferase 3;2	Q8W2B8	SAT4_ARATH Serine acetyltransferase 4 OS=Arabidopsis thaliana GN=SAT4 PE=1 SV=1	M5VVC1	M5VVC1_PRUPE Uncharacterized protein (Fragment) OS=Prunus persica GN=PRUPE_ppa021964mg PE=4 SV=1	pop:POPTR_818359	hypothetical protein ; K00640 serine O-acetyltransferase [EC:2.3.1.30]	PF00132.19|Hexapep; PB015985|Pfam-B_15985; PB004136|Pfam-B_4136; PF06426.9|SATase_N	IPR001451|Bacterial transferase hexapeptide repeat; IPR010493|Serine acetyltransferase, N-terminal; IPR018357|Hexapeptide transferase, conserved site	GO:0009001|serine O-acetyltransferase activity ; GO:0006535|cysteine biosynthetic process from serine ; GO:0016740|transferase activity ; GO:0005737|cytoplasm	3	5	7	17	-0.737599	-1.32819	0.54	1.78	0	-1
Gh_D13G2069	D13	+	56241610	56242801	AT5G56760	serine acetyltransferase 1;1	Q42538	SAT5_ARATH Serine acetyltransferase 5 OS=Arabidopsis thaliana GN=SAT5 PE=1 SV=1	B9MWB2	B9MWB2_POPTR Predicted protein OS=Populus trichocarpa GN=POPTRDRAFT_826889 PE=2 SV=1	pop:POPTR_826889	hypothetical protein ; K00640 serine O-acetyltransferase [EC:2.3.1.30]	PF00132.19|Hexapep; PB015985|Pfam-B_15985; PB004136|Pfam-B_4136; PF06426.9|SATase_N; PF14602.1|Hexapep_2	IPR001451|Bacterial transferase hexapeptide repeat; IPR010493|Serine acetyltransferase, N-terminal; IPR018357|Hexapeptide transferase, conserved site	GO:0009001|serine O-acetyltransferase activity ; GO:0006535|cysteine biosynthetic process from serine ; GO:0016740|transferase activity ; GO:0005737|cytoplasm	47	21	88	90	1.19259	-0.027081	1.43	0.06	1	0
Gh_A05G1924	A05	-	20163311	20166735	AT1G22410	Class-II DAHP synthetase family protein	P37216	AROG_SOLLC Phospho-2-dehydro-3-deoxyheptonate aldolase 2, chloroplastic OS=Solanum lycopersicum PE=2 SV=1	B9RJN2	B9RJN2_RICCO Phospho-2-dehydro-3-deoxyheptonate aldolase 1, chloroplast, putative OS=Ricinus communis GN=RCOM_1036940 PE=4 SV=1	pop:POPTR_559072	DHS4; 2-dehydro-3-deoxyphosphoheptonate aldolase/ 3-deoxy-d-arabino-heptulosonate 7-phosphate synthetase ; K01626 3-deoxy-7-phosphoheptulonate synthase [EC:2.5.1.54]	PF01474.11|DAHP_synth_2	IPR002480|DAHP synthetase, class II	GO:0003849|3-deoxy-7-phosphoheptulonate synthase activity ; GO:0009073|aromatic amino acid family biosynthetic process	782	184	329	372	2.08671	-0.180037	2.42	0.24	1	0
Gh_D05G2157	D05	-	20198645	20202056	AT1G22410	Class-II DAHP synthetase family protein	P37216	AROG_SOLLC Phospho-2-dehydro-3-deoxyheptonate aldolase 2, chloroplastic OS=Solanum lycopersicum PE=2 SV=1	B9RJN2	B9RJN2_RICCO Phospho-2-dehydro-3-deoxyheptonate aldolase 1, chloroplast, putative OS=Ricinus communis GN=RCOM_1036940 PE=4 SV=1	pop:POPTR_559072	DHS4; 2-dehydro-3-deoxyphosphoheptonate aldolase/ 3-deoxy-d-arabino-heptulosonate 7-phosphate synthetase ; K01626 3-deoxy-7-phosphoheptulonate synthase [EC:2.5.1.54]	PF01474.11|DAHP_synth_2	IPR002480|DAHP synthetase, class II	GO:0003849|3-deoxy-7-phosphoheptulonate synthase activity ; GO:0009073|aromatic amino acid family biosynthetic process	750	183	295	314	2.03758	-0.0903282	4	0.3	1	0
Gh_D12G0562	D12	-	10433418	10435860	AT5G66120	3-dehydroquinate synthase, putative	B8GPV3	AROB_THISH 3-dehydroquinate synthase OS=Thioalkalivibrio sp. (strain HL-EbGR7) GN=aroB PE=3 SV=1	Q30D01	Q30D01_FAGSY Putative 3-dehydroquinate synthase OS=Fagus sylvatica PE=2 SV=1	vvi:100266137	GSVIVT00036740001; hypothetical protein LOC100266137 ; K01735 3-dehydroquinate synthase [EC:4.2.3.4]	PF01761.15|DHQ_synthase		GO:0009073|aromatic amino acid family biosynthetic process ; GO:0003856|3-dehydroquinate synthase activity	86	35	74	98	1.30384	-0.41855	2.12	1.13	1	0
Gh_A11G1596	A11	-	23433255	23435731	AT5G66120	3-dehydroquinate synthase, putative	B8GPV3	AROB_THISH 3-dehydroquinate synthase OS=Thioalkalivibrio sp. (strain HL-EbGR7) GN=aroB PE=3 SV=1	B9VU86	B9VU86_VITVI 3-dehydroquinate synthase OS=Vitis vinifera PE=2 SV=1	vvi:100266137	GSVIVT00036740001; hypothetical protein LOC100266137 ; K01735 3-dehydroquinate synthase [EC:4.2.3.4]	PF01761.15|DHQ_synthase		GO:0009073|aromatic amino acid family biosynthetic process ; GO:0003856|3-dehydroquinate synthase activity	45	13	31	51	1.75703	-0.726205	1.46	1	1	0
Gh_D12G2439	D12	+	57422391	57426553	AT2G21940	shikimate kinase 1	Q9SJ05	SK1_ARATH Shikimate kinase 1, chloroplastic OS=Arabidopsis thaliana GN=SK1 PE=1 SV=2	M5W0C8	M5W0C8_PRUPE Uncharacterized protein OS=Prunus persica GN=PRUPE_ppa009120mg PE=4 SV=1	pop:POPTR_819856	SK3; shikimate kinase (EC:2.7.1.71); K00891 shikimate kinase [EC:2.7.1.71]	PF01202.17|SKI	IPR000623|Shikimate kinase/Threonine synthase-like 1; IPR023000|Shikimate kinase, conserved site	GO:0004765|shikimate kinase activity ; GO:0005524|ATP binding	10	20	16	31	-1.0527	-0.975079	1.65	2.06	-1	0
Gh_A12G2303	A12	+	85688257	85692091	AT2G21940	shikimate kinase 1	Q9SJ05	SK1_ARATH Shikimate kinase 1, chloroplastic OS=Arabidopsis thaliana GN=SK1 PE=1 SV=2	M5W0C8	M5W0C8_PRUPE Uncharacterized protein OS=Prunus persica GN=PRUPE_ppa009120mg PE=4 SV=1	vvi:100262762	GSVIVT00019395001; hypothetical protein LOC100262762 ; K00891 shikimate kinase [EC:2.7.1.71]	PF01202.17|SKI	IPR000623|Shikimate kinase/Threonine synthase-like 1; IPR023000|Shikimate kinase, conserved site	GO:0004765|shikimate kinase activity ; GO:0005524|ATP binding	4	10	9	31	-1.33451	-1.75281	1.04	2.24	0	-1
Gh_D12G1013	D12	+	35862879	35865958	AT2G45300	RNA 3\'-terminal phosphate cyclase/enolpyruvate transferase, alpha/beta	P05466	AROA_ARATH 3-phosphoshikimate 1-carboxyvinyltransferase, chloroplastic OS=Arabidopsis thaliana GN=At2g45300 PE=2 SV=3	B2C1I9	B2C1I9_GOSHI 3-phosphoshikimate 1-carboxyvinyltransferase OS=Gossypium hirsutum GN=EPSPS PE=2 SV=1	vvi:100232912	GSVIVT00026409001; 5-enolpyruvylshikimate-3-phosphate synthase ; K00800 3-phosphoshikimate 1-carboxyvinyltransferase [EC:2.5.1.19]	PF00275.15|EPSP_synthase	IPR001986|Enolpyruvate transferase domain; IPR023193|3-phosphoshikimate 1-carboxyvinyltransferase, conserved site	GO:0016765|transferase activity, transferring alkyl or aryl (other than methyl) groups	244	53	55	81	2.20101	-0.555627	3.37	1.1	1	0
Gh_A12G0923	A12	+	59396777	59399852	AT2G45300	RNA 3\'-terminal phosphate cyclase/enolpyruvate transferase, alpha/beta	P05466	AROA_ARATH 3-phosphoshikimate 1-carboxyvinyltransferase, chloroplastic OS=Arabidopsis thaliana GN=At2g45300 PE=2 SV=3	A7Y7Y2	A7Y7Y2_GOSHI 3-phosphoshikimate 1-carboxyvinyltransferase OS=Gossypium hirsutum GN=EPSPS PE=2 SV=1	vvi:100232912	GSVIVT00026409001; 5-enolpyruvylshikimate-3-phosphate synthase ; K00800 3-phosphoshikimate 1-carboxyvinyltransferase [EC:2.5.1.19]	PF00275.15|EPSP_synthase	IPR001986|Enolpyruvate transferase domain; IPR023193|3-phosphoshikimate 1-carboxyvinyltransferase, conserved site	GO:0016765|transferase activity, transferring alkyl or aryl (other than methyl) groups	305	54	30	75	2.49657	-1.34303	3.16	1.43	1	-1
Gh_D10G2107	D10	-	57842820	57848389	AT1G48850	chorismate synthase, putative / 5-enolpyruvylshikimate-3-phosphate phospholyase, putative	P57720	AROC_ARATH Chorismate synthase, chloroplastic OS=Arabidopsis thaliana GN=EMB1144 PE=2 SV=2	B9SUA2	B9SUA2_RICCO Chorismate synthase OS=Ricinus communis GN=RCOM_0228160 PE=1 SV=1	pop:POPTR_724971	CS2; chorismate synthase ; K01736 chorismate synthase [EC:4.2.3.5]	PF01264.16|Chorismate_synt	IPR000453|Chorismate synthase; IPR020541|Chorismate synthase, conserved site	GO:0009073|aromatic amino acid family biosynthetic process ; GO:0004107|chorismate synthase activity	213	73	90	104	1.54988	-0.217343	2.76	0.42	1	0
Gh_A10G1847	A10	-	94558456	94563961	AT1G48850	chorismate synthase, putative / 5-enolpyruvylshikimate-3-phosphate phospholyase, putative	P57720	AROC_ARATH Chorismate synthase, chloroplastic OS=Arabidopsis thaliana GN=EMB1144 PE=2 SV=2	B9SUA2	B9SUA2_RICCO Chorismate synthase OS=Ricinus communis GN=RCOM_0228160 PE=1 SV=1	pop:POPTR_724971	CS2; chorismate synthase ; K01736 chorismate synthase [EC:4.2.3.5]	PF01264.16|Chorismate_synt	IPR000453|Chorismate synthase; IPR020541|Chorismate synthase, conserved site	GO:0009073|aromatic amino acid family biosynthetic process ; GO:0004107|chorismate synthase activity	211	75	74	87	1.499	-0.230524	2.82	0.41	1	0
Gh_A05G2556	A05	-	36069976	36075843	AT1G48850	chorismate synthase, putative / 5-enolpyruvylshikimate-3-phosphate phospholyase, putative	P57720	AROC_ARATH Chorismate synthase, chloroplastic OS=Arabidopsis thaliana GN=EMB1144 PE=2 SV=2	B9SUA2	B9SUA2_RICCO Chorismate synthase OS=Ricinus communis GN=RCOM_0228160 PE=1 SV=1	pop:POPTR_724971	CS2; chorismate synthase ; K01736 chorismate synthase [EC:4.2.3.5]	PF01264.16|Chorismate_synt	IPR000453|Chorismate synthase; IPR020541|Chorismate synthase, conserved site	GO:0009073|aromatic amino acid family biosynthetic process ; GO:0004107|chorismate synthase activity	165	45	45	62	1.88327	-0.459314	3.81	1.34	1	0
Gh_D05G2834	D05	-	31820231	31826166	AT1G48850	chorismate synthase, putative / 5-enolpyruvylshikimate-3-phosphate phospholyase, putative	P57720	AROC_ARATH Chorismate synthase, chloroplastic OS=Arabidopsis thaliana GN=EMB1144 PE=2 SV=2	B9SUA2	B9SUA2_RICCO Chorismate synthase OS=Ricinus communis GN=RCOM_0228160 PE=1 SV=1	pop:POPTR_724971	CS2; chorismate synthase ; K01736 chorismate synthase [EC:4.2.3.5]	PF01264.16|Chorismate_synt	IPR000453|Chorismate synthase; IPR020541|Chorismate synthase, conserved site	GO:0009073|aromatic amino acid family biosynthetic process ; GO:0004107|chorismate synthase activity	101	23	33	44	2.11389	-0.419302	3.64	1.24	1	0
Gh_Sca032539G01	scaffold32539	+	25	1065	AT1G48850	chorismate synthase, putative / 5-enolpyruvylshikimate-3-phosphate phospholyase, putative	P57720	AROC_ARATH Chorismate synthase, chloroplastic OS=Arabidopsis thaliana GN=EMB1144 PE=2 SV=2	F4I033	F4I033_ARATH Chorismate synthase OS=Arabidopsis thaliana GN=EMB1144 PE=2 SV=1	ath:AT1G48850	EMB1144 (EMBRYO DEFECTIVE 1144); chorismate synthase ; K01736 chorismate synthase [EC:4.2.3.5]	PF01264.16|Chorismate_synt	IPR000453|Chorismate synthase; IPR020541|Chorismate synthase, conserved site	GO:0009073|aromatic amino acid family biosynthetic process ; GO:0004107|chorismate synthase activity	22	3	10	21	2.86212	-1.03724	2.78	2.34	1	-1
Gh_D10G2105	D10	-	57798424	57808742	AT1G48850	chorismate synthase, putative / 5-enolpyruvylshikimate-3-phosphate phospholyase, putative	P57720	AROC_ARATH Chorismate synthase, chloroplastic OS=Arabidopsis thaliana GN=EMB1144 PE=2 SV=2	M4DCE4	M4DCE4_BRARP Chorismate synthase OS=Brassica rapa subsp. pekinensis GN=Bra014158 PE=3 SV=1	pop:POPTR_724971	CS2; chorismate synthase ; K01736 chorismate synthase [EC:4.2.3.5]	PF01264.16|Chorismate_synt	IPR000453|Chorismate synthase; IPR020541|Chorismate synthase, conserved site	GO:0009073|aromatic amino acid family biosynthetic process ; GO:0004107|chorismate synthase activity	20	6	8	12	1.71114	-0.617191	1.34	0.48	1	0
Gh_D09G0592	D09	-	28484129	28488312	AT3G06350	dehydroquinate dehydratase, putative / shikimate dehydrogenase, putative	Q9SQT8	DHQSD_ARATH Bifunctional 3-dehydroquinate dehydratase/shikimate dehydrogenase, chloroplastic OS=Arabidopsis thaliana GN=EMB3004 PE=1 SV=1	B9HSF2	B9HSF2_POPTR Dehydroquinate dehydratase/ shikimate dehydrogenase OS=Populus trichocarpa GN=DHQD4 PE=3 SV=1	ath:AT3G06350	EMB3004/MEE32 (EMBRYO DEFECTIVE 3004); 3-dehydroquinate dehydratase/ NADP binding / binding / catalytic/ shikimate 5-dehydrogenase ; K00014 shikimate 5-dehydrogenase [EC:1.1.1.25]; K03785 3-dehydroquinate dehydratase I [EC:4.2.1.10]	PB016164|Pfam-B_16164; PF08501.6|Shikimate_dh_N; PF01488.15|Shikimate_DH; PF01487.10|DHquinase_I	IPR001381|Dehydroquinase class I; IPR006151|Quinate/shikimate 5-dehydrogenase/glutamyl-tRNA reductase; IPR013708|Shikimate dehydrogenase substrate binding, N-terminal	GO:0003855|3-dehydroquinate dehydratase activity ; GO:0055114|oxidation-reduction process ; GO:0004764|shikimate 3-dehydrogenase (NADP+) activity	105	50	58	80	1.07343	-0.461837	1.71	0.76	1	0
Gh_A13G0701	A13	-	22883028	22886194	AT1G69370	chorismate mutase 3	Q9C544	CM3_ARATH Chorismate mutase 3, chloroplastic OS=Arabidopsis thaliana GN=CM3 PE=1 SV=1	M5XD70	M5XD70_PRUPE Uncharacterized protein OS=Prunus persica GN=PRUPE_ppa008640mg PE=4 SV=1	ath:AT1G69370	CM3; CM3 (CHORISMATE MUTASE 3); chorismate mutase ; K01850 chorismate mutase [EC:5.4.99.5]	PB005800|Pfam-B_5800; PB009705|Pfam-B_9705; PB001059|Pfam-B_1059	IPR008238|Chorismate mutase, AroQ class, eukaryotic type	GO:0004106|chorismate mutase activity; GO:0009073|aromatic amino acid family biosynthetic process	11	12	9	26	-0.11607	-1.49962	0.09	1.59	0	-1
Gh_D13G0823	D13	-	14937497	14940657	AT1G69370	chorismate mutase 3	Q9C544	CM3_ARATH Chorismate mutase 3, chloroplastic OS=Arabidopsis thaliana GN=CM3 PE=1 SV=1	M5XD70	M5XD70_PRUPE Uncharacterized protein OS=Prunus persica GN=PRUPE_ppa008640mg PE=4 SV=1	ath:AT1G69370	CM3; CM3 (CHORISMATE MUTASE 3); chorismate mutase ; K01850 chorismate mutase [EC:5.4.99.5]	PB005800|Pfam-B_5800; PB009705|Pfam-B_9705; PB001059|Pfam-B_1059; PF01817.16|CM_2	IPR008238|Chorismate mutase, AroQ class, eukaryotic type; IPR020822|Chorismate mutase, type II	GO:0046417|chorismate metabolic process ; GO:0004106|chorismate mutase activity; GO:0009073|aromatic amino acid family biosynthetic process	11	9	10	27	0.235312	-1.43507	0.13	1.32	0	-1
Gh_D11G0753	D11	-	6503864	6506939	AT3G29200	chorismate mutase 1	P42738	CM1_ARATH Chorismate mutase 1, chloroplastic OS=Arabidopsis thaliana GN=CM1 PE=1 SV=3	D2CSU4	D2CSU4_PETHY Chorismate mutase 1 OS=Petunia hybrida GN=CM1 PE=2 SV=1	ath:AT3G29200	CM1; CM1 (chorismate mutase 1); chorismate mutase ; K01850 chorismate mutase [EC:5.4.99.5]	PB005800|Pfam-B_5800; PB009705|Pfam-B_9705; PB001059|Pfam-B_1059; PF01817.16|CM_2	IPR008238|Chorismate mutase, AroQ class, eukaryotic type; IPR020822|Chorismate mutase, type II	GO:0046417|chorismate metabolic process ; GO:0004106|chorismate mutase activity; GO:0009073|aromatic amino acid family biosynthetic process	50	17	27	36	1.55287	-0.429909	2.38	0.9	1	0
Gh_A09G0884	A09	-	57116588	57117868	AT1G08250	arogenate dehydratase 6	Q9SGD6	AROD6_ARATH Arogenate dehydratase/prephenate dehydratase 6, chloroplastic OS=Arabidopsis thaliana GN=ADT6 PE=1 SV=1	A9PHG2	A9PHG2_POPTR Arogenate/prephenate dehydratase OS=Populus trichocarpa GN=PDT2 PE=2 SV=1	ppp:PHYPADRAFT_128069	hypothetical protein ; K04518 prephenate dehydratase [EC:4.2.1.51]	PF00800.13|PDT	IPR001086|Prephenate dehydratase; IPR018528|Prephenate dehydratase, conserved site	GO:0004664|prephenate dehydratase activity ; GO:0009094|L-phenylalanine biosynthetic process	214	47	59	70	2.18836	-0.245906	3.75	0.64	1	0
Gh_D09G0908	D09	-	34416392	34417672	AT1G08250	arogenate dehydratase 6	Q9SGD6	AROD6_ARATH Arogenate dehydratase/prephenate dehydratase 6, chloroplastic OS=Arabidopsis thaliana GN=ADT6 PE=1 SV=1	B9HQT5	B9HQT5_POPTR Arogenate/prephenate dehydratase OS=Populus trichocarpa GN=PDT4 PE=4 SV=1	ppp:PHYPADRAFT_128069	hypothetical protein ; K04518 prephenate dehydratase [EC:4.2.1.51]	PF00800.13|PDT	IPR001086|Prephenate dehydratase; IPR018528|Prephenate dehydratase, conserved site	GO:0004664|prephenate dehydratase activity ; GO:0009094|L-phenylalanine biosynthetic process	202	46	54	61	2.14267	-0.175686	4.06	0.51	1	0
Gh_D08G0077	D08	-	630530	631831	AT1G08250	arogenate dehydratase 6	Q9SGD6	AROD6_ARATH Arogenate dehydratase/prephenate dehydratase 6, chloroplastic OS=Arabidopsis thaliana GN=ADT6 PE=1 SV=1	B9SN95	B9SN95_RICCO Prephenate dehydratase, putative OS=Ricinus communis GN=RCOM_1187000 PE=4 SV=1	ppp:PHYPADRAFT_128069	hypothetical protein ; K04518 prephenate dehydratase [EC:4.2.1.51]	PF00800.13|PDT	IPR001086|Prephenate dehydratase; IPR018528|Prephenate dehydratase, conserved site	GO:0004664|prephenate dehydratase activity ; GO:0009094|L-phenylalanine biosynthetic process	89	16	31	74	2.48107	-1.2362	2.09	1.65	1	-1
Gh_A08G0037	A08	-	270719	272011	AT1G08250	arogenate dehydratase 6	Q9SGD6	AROD6_ARATH Arogenate dehydratase/prephenate dehydratase 6, chloroplastic OS=Arabidopsis thaliana GN=ADT6 PE=1 SV=1	A9PHG2	A9PHG2_POPTR Arogenate/prephenate dehydratase OS=Populus trichocarpa GN=PDT2 PE=2 SV=1	ppp:PHYPADRAFT_128069	hypothetical protein ; K04518 prephenate dehydratase [EC:4.2.1.51]	PF00800.13|PDT	IPR001086|Prephenate dehydratase; IPR018528|Prephenate dehydratase, conserved site	GO:0004664|prephenate dehydratase activity ; GO:0009094|L-phenylalanine biosynthetic process	106	25	22	50	2.07588	-1.17066	2.5	1.41	1	-1
[truncated: 5,735 more rows]
